# Supplementary material for: The gut contractile organoid for studying the gut motility regulated by coordinating signals between interstitial cells of Cajal and smooth muscles
Source: eLife. 2025 Aug 22;13:RP97860. doi: 10.7554/eLife.97860 (PMC12373395; doi:10.7554/eLife.97860)
Supplement: Figure 2—source data 1. [file elife-97860-fig2-data1.xlsx]

## Sheet: Day3-timelapse
Time [s]	#1 (TD)	#2 (TD)	Time [s]	#1 (TD)	#2 (TD)	#4 (TD)	Time [s]	#1 (TD)	#2 (TD)	Time [s]	#1 (TD)	#2 (TD)	#3 (TD)	Time [s]	#1 (TD)	#2 (TD)	Time [s]	#1 (TD)	#2 (TD)	#3 (TD)	Time [s]	#1 (TD)	#2 (TD)	Time [s]	#1 (TD)	#2 (TD)	Time [s]	#1 (TD)	Time [s]	#1 (TD)	#2 (TD)	#3 (TD)	Time [s]	#1 (TD)	#2 (TD)	#3 (TD)	Time [s]	#1 (TD)	#2 (TD)	#3 (TD)	Time [s]	#1 (TD)	#2 (TD)	Time [s]	#1 (TD)	#2 (TD)	Time [s]	#1 (TD)	Time [s]
0.064	137.52	169.11	0.064	177.66	201.58	155.77	0.063	242.88	206.52	0.065	214.12	218.81	204.93	0.065	207.59	209.02	0.064	241.37	249.68	229.63	0.064	203.15	211.09	0.065	197.57	204.53	0.065	174.61	0.063	184.4	191.85	196.4	0.064	199.92	213.43	225.93	0.064	182.77	173.45	192.63	0.065	213.92	178.27	0.065	203.4	248.65	0.065	227.64	0.065
0.768	136.92	168.67	0.767	175.93	201.56	155.62	0.767	241.21	206.74	0.768	213.92	218.76	204.9	0.769	207.29	208.6	0.768	241.71	250.37	229.21	0.767	201.25	211.34	0.769	196.83	204.19	0.769	175.25	0.767	183.84	191.65	196.62	0.768	199.9	212.01	225.66	0.768	178.41	170.78	193.22	0.769	213.39	178.31	0.769	203.11	249.26	0.768	231.19	0.769
1.464	136.77	169.33	1.465	176.47	201.03	155.39	1.464	242.21	206.13	1.464	213.85	218.89	204.78	1.464	207.02	208.28	1.465	244.14	249.67	229.6	1.465	200.67	210.79	1.464	196.43	205.06	1.465	176.9	1.463	181.46	191.3	196.97	1.464	199.89	211.62	225.21	1.464	175.98	171.75	192.6	1.465	212.91	178.36	1.464	202.7	252.43	1.464	232.33	1.465
2.169	137.11	168.88	2.168	176.36	201.53	154.39	2.167	240.85	206.34	2.169	213.51	218.93	204.74	2.168	206.92	208.5	2.168	250.69	248.22	228.32	2.169	201.75	211	2.168	197.13	204.83	2.168	179.26	2.166	179.55	192.18	196.94	2.169	199.56	212.71	224.68	2.168	177.98	173.86	192.6	2.169	212.78	178.35	2.165	202.76	253.82	2.169	232.26	2.169
2.869	136.96	169.25	2.869	175.61	200.94	153.43	2.867	241.89	206.39	2.869	213.45	219.19	204.62	2.867	206.69	208.37	2.867	248.48	247.94	228.38	2.868	202.81	208.42	2.867	197.67	204.5	2.868	179.6	2.868	179.39	192.43	197.05	2.868	199.34	213.66	224.89	2.868	179.61	173.6	192.64	2.869	213.17	178.26	2.867	202.68	254.85	2.868	232.59	2.869
3.568	136.99	169.54	3.568	175.68	200.71	152.76	3.569	240.49	206.14	3.568	213.79	219.13	204.71	3.57	206.17	208.23	3.568	249.83	247.93	227.81	3.568	203.52	207.59	3.568	198.7	208.68	3.568	180.32	3.567	180.32	192.28	196.87	3.567	199.48	213.67	224.4	3.568	180.73	173.51	192.39	3.569	212.73	178.33	3.569	203.11	255.2	3.567	232.85	3.569
4.268	137.09	169.49	4.268	175.36	201.07	153.09	4.267	240.27	206.04	4.268	213.2	218.61	204.61	4.269	206.36	208.44	4.267	248	246.96	228.99	4.268	203.55	208.56	4.267	198.7	211.55	4.267	180.76	4.269	182.41	192.31	196.83	4.268	199.03	214.07	225	4.268	181.3	173.79	192.64	4.269	211.74	178.23	4.267	203.49	255.64	4.267	232.78	4.269
4.968	137.36	169.23	4.963	175.43	200.9	153.73	4.968	240.09	206.42	4.968	213.04	218.88	204.6	4.97	206.81	208.1	4.968	246.64	246.96	228.24	4.969	202.44	208.98	4.967	198.5	207.52	4.969	180.91	4.966	183.21	192.04	197.05	4.971	199.25	214.19	224.79	4.97	181.67	173.61	192.06	4.969	211.99	178.63	4.969	203.55	256.14	4.967	232.92	4.968
5.668	137.07	169.73	5.667	175.4	200.84	153.87	5.667	239.68	205.72	5.668	213.57	219.16	204.64	5.668	206.32	208.42	5.668	245.46	246.65	228.49	5.67	202.75	209.54	5.668	197.82	205.94	5.669	181.15	5.667	183.42	192.49	196.74	5.668	197.66	214.65	224.59	5.669	181.43	173.92	191.93	5.669	211.53	178.16	5.668	203.62	256.27	5.667	232.72	5.668
6.367	137.31	169.5	6.364	175.01	200.86	155.23	6.369	239.83	205.03	6.367	212.99	218.41	204.22	6.369	206.31	208.58	6.368	246.08	246.09	228.29	6.37	202.45	209.53	6.368	198.4	204.36	6.369	181.12	6.367	183.53	192.8	197.47	6.37	196.98	214.9	224.61	6.368	182.02	174.3	192.45	6.369	211.57	175.44	6.369	203.91	256.44	6.367	232.45	6.37
7.067	137.33	169.49	7.068	174.31	200.02	155.47	7.067	248.67	205.89	7.068	213	218.96	204.33	7.07	215.88	208.28	7.068	245.68	246.22	227.91	7.068	202.45	209.18	7.065	198	203.25	7.067	181.18	7.068	183.21	191.31	197.35	7.068	195.26	215.47	225.14	7.068	182.22	174.32	192.3	7.068	207.41	169.82	7.066	203.74	256.95	7.068	231.46	7.07
7.768	137.59	169.91	7.768	174.43	197.83	155.73	7.769	257.68	205.56	7.768	212.63	218.98	204.51	7.766	219.21	208.82	7.768	245.94	245.91	228.14	7.769	202.63	209.13	7.768	197.69	202.84	7.768	181.46	7.767	183.64	190.5	197.14	7.768	195.74	215.55	224.97	7.769	182.26	174.16	192.26	7.768	207.83	169.36	7.768	203.61	257	7.769	221.48	7.768
8.469	137.42	169.4	8.468	174.47	194.89	155.33	8.469	256.66	205.59	8.468	212.97	218.97	204.45	8.469	216.05	208.86	8.468	244.67	245.95	242.51	8.468	202.29	209.18	8.469	197.81	202.31	8.469	181.32	8.468	183.75	190.48	196.82	8.469	195.86	215.71	224.9	8.467	182.53	171.45	191.93	8.468	207.59	171.85	8.468	200.61	257.12	8.468	218.07	8.47
9.17	137.47	169.88	9.17	174.52	195.53	155.25	9.169	250.9	205.74	9.168	213.01	218.85	204.26	9.168	213.82	208.64	9.169	245.31	244.31	251.65	9.168	202.73	209.46	9.169	197.66	202.03	9.168	181.47	9.168	184.26	191.45	197.13	9.17	196.61	215.77	228.2	9.166	182.45	170.08	195.32	9.168	207.93	172.15	9.166	199.19	257.68	9.168	220.6	9.169
9.868	137.39	169.08	9.864	174.11	197.56	155.4	9.869	252.62	205.33	9.87	213	218.92	204.35	9.868	212.24	208.47	9.869	244.64	243.78	241.15	9.869	202.38	209.47	9.869	197.1	202.36	9.87	181.26	9.867	184.42	192.08	197.01	9.868	197.04	215.57	228.58	9.868	182.63	171.51	197.53	9.864	207.91	173.23	9.868	196.89	257.74	9.868	226.78	9.87
10.569	137.31	169.47	10.569	174.71	200.12	155.52	10.569	257.75	205.21	10.567	212.77	219.07	204.5	10.568	210.24	208.24	10.569	243.86	243.37	233.15	10.569	203.22	210.33	10.569	196.04	202.65	10.568	181.2	10.567	184.58	192.31	197	10.568	197.31	215.25	227.41	10.567	182.74	173.27	197.76	10.568	207.26	173.99	10.568	197.34	257.9	10.568	229.98	10.567
11.269	137.46	169.22	11.268	174.16	201.2	155.35	11.268	256.52	205.44	11.268	212.86	218.76	204.44	11.268	209.71	208.4	11.267	243.82	243.29	236.04	11.268	202.8	210.59	11.267	196.07	202.32	11.27	180.95	11.267	184.52	192.68	195.52	11.27	197.92	215.41	227.15	11.268	182.71	173.46	196.18	11.269	207.28	173.95	11.268	198.66	258.52	11.268	231.69	11.267
11.969	137.1	169.23	11.965	174.55	200.5	154.84	11.969	254.27	205.03	11.969	212.71	218.83	204.24	11.969	210.14	208.56	11.968	243.92	244.43	235.32	11.968	203.07	210.6	11.968	197.09	206.71	11.968	181	11.969	184.65	192.81	195.34	11.97	198.14	215.38	226.26	11.968	182.84	173.67	193.76	11.969	207.73	174.49	11.967	200.04	258.76	11.968	231.99	11.97
12.668	137.19	169.03	12.666	174.68	201.36	155.68	12.671	251.49	204.72	12.67	212.71	218.87	203.98	12.668	209.71	208.39	12.668	243.7	244.6	235.19	12.668	203.24	211.06	12.667	197.31	204.67	12.668	181.19	12.668	184.43	192.97	194.59	12.671	198.33	215.18	226.64	12.668	182.6	173.84	192.92	12.667	207.48	174.47	12.668	200.5	258.94	12.669	232.12	12.668
13.369	137.32	169.28	13.369	174.37	201.84	155.43	13.37	248.61	205.32	13.368	212.4	219.1	204.29	13.369	209.19	208.37	13.369	243.5	244.95	234.39	13.369	203.22	211.47	13.368	197.83	203.75	13.369	180.54	13.368	184.22	193.17	193.98	13.369	198.72	214.99	226.34	13.368	182.82	173.84	192.6	13.367	207.57	174.63	13.368	201.48	259.26	13.368	231.77	13.37
14.069	137.07	169.29	14.068	174.39	201.57	155.33	14.07	245.57	205.46	14.07	212.85	218.32	204.24	14.068	208.64	208.28	14.07	243.85	244.52	233.78	14.068	203.19	211.77	14.069	198.49	205.68	14.069	178.2	14.068	184.42	192.98	193.83	14.068	198.87	214.54	225.97	14.067	182.99	173.84	192.66	14.069	207.27	174.55	14.069	201.93	255.24	14.067	232.2	14.067
14.769	136.95	169.22	14.768	174.47	201.97	155.54	14.769	244.02	205.38	14.77	212.91	218.73	204.18	14.768	208.34	208.13	14.769	242.88	244.81	234.16	14.769	203.25	211.53	14.768	198.71	203.81	14.77	175.66	14.769	183.37	192.62	194.07	14.769	198.88	213.19	226.06	14.768	183.01	173.99	193.02	14.767	207.59	174.54	14.768	202.83	252.51	14.767	231.93	14.769
15.469	137.24	169.02	15.464	174.28	201.51	155.6	15.467	242.33	205.47	15.469	212.67	218.62	204.34	15.468	208.18	208.39	15.469	243.13	243.95	234.33	15.469	203.43	210.32	15.468	198.19	204.04	15.469	176.09	15.468	181.43	192.64	195.57	15.469	199.16	213.23	226.3	15.468	183.16	174.22	193.23	15.467	207.69	174.94	15.468	203.06	248.09	15.467	231.49	15.468
16.169	137.15	169.92	16.165	174.53	201.73	155.51	16.168	240.58	205.36	16.169	212.68	218.66	204.17	16.17	207.88	208.2	16.169	243.43	244.05	234.39	16.169	203.42	207.52	16.169	197.63	203.28	16.169	177.73	16.168	180.25	192.46	195.26	16.169	199.2	212.99	225.9	16.167	183.13	172.02	192.78	16.167	207.31	174.82	16.168	199.39	248.94	16.167	229.57	16.168
16.869	136.97	169.31	16.867	174.76	201.67	155.26	16.867	239.78	205.68	16.868	212.55	218.31	204.07	16.869	207.86	208.42	16.869	243.15	253.76	233.73	16.87	203.3	199.6	16.868	197.93	202.69	16.867	177.81	16.868	179.51	192.64	195.84	16.863	199.34	213.25	225.82	16.868	183.12	170.68	193.41	16.863	207.55	174.38	16.869	199.17	249.97	16.869	219.1	16.869
17.568	137.2	169.29	17.567	175.96	200.96	155.41	17.568	240.67	205.71	17.57	212.61	218.56	204.16	17.57	208.01	207.7	17.568	242.6	259.44	234.82	17.569	203.39	197.44	17.568	197.67	202.49	17.569	177.21	17.568	181.2	192.72	196.25	17.569	199.41	214.16	225.96	17.567	182.96	170.44	193.2	17.567	207.12	174.88	17.569	198.55	254.06	17.568	217.48	17.569
18.268	137.09	169.81	18.267	177.06	200.89	155.23	18.267	239.56	205.09	18.269	212.55	218.23	203.72	18.269	207.1	208.23	18.268	241.81	254.15	234.16	18.27	202.99	200.2	18.268	197.58	203.61	18.269	175.58	18.269	182.26	191.67	196.64	18.269	199.3	214.48	225.47	18.267	182.72	173.63	192.97	18.267	207.61	174.75	18.268	201.19	255.11	18.268	221.99	18.268
18.968	137.04	169.47	18.967	179.31	201.76	155.65	18.967	239.73	204.79	18.969	212.62	218.31	203.84	18.969	207.38	207.91	18.967	242.07	254.83	233.21	18.969	203.32	201.07	18.967	196.59	207.32	18.969	175.87	18.969	182.57	191.22	196.87	18.969	199.37	214.79	225.32	18.968	179.24	174.16	193.34	18.968	208.99	174.74	18.968	202.94	256.41	18.967	225.94	18.968
19.669	136.85	169.36	19.667	179.1	201.28	155.66	19.667	239.64	204.86	19.669	212.17	218.33	204.01	19.668	207.73	208.05	19.669	242.01	251.86	232.73	19.669	203.91	202.69	19.67	195.62	207.34	19.669	177.64	19.669	182.86	192.2	196.94	19.668	199.38	215.1	225.3	19.667	175.46	173.63	192.45	19.668	211.64	174.48	19.668	204.11	257.3	19.668	229.2	19.669
20.368	136.75	168.85	20.367	180.58	201.63	155.4	20.367	238.73	205.13	20.369	212.19	218.35	203.87	20.37	207.49	208	20.368	241.99	256.78	231.82	20.37	203.89	203.27	20.37	196.82	204.7	20.369	178.17	20.369	182.86	191.83	196.85	20.369	199.14	215.07	224.92	20.367	175.49	173.64	193.79	20.368	215.47	174.73	20.37	204.16	258.19	20.367	230.22	20.369
21.068	136.86	173.85	21.068	182.54	202.04	155.27	21.067	238.82	205.36	21.068	211.84	218.03	203.8	21.068	207.94	207.9	21.068	241.16	251.67	230.4	21.068	203.1	203.62	21.069	196.63	205.29	21.068	180.14	21.069	183.02	192.26	197.02	21.069	199.62	214.14	225.26	21.068	178.66	173.47	197.53	21.068	213.01	174.94	21.068	204.67	259.18	21.067	230.59	21.068
21.769	136.66	176.58	21.769	182.82	202.06	155.96	21.767	238.83	205.16	21.768	212.55	218.33	203.72	21.77	207.44	207.71	21.768	242.2	252.14	230.58	21.769	203.51	206.01	21.77	197.64	204.5	21.768	180.92	21.769	183.42	192.46	197.11	21.769	199.25	212.9	225.44	21.767	179.8	173.26	198.06	21.768	211.78	174.78	21.768	204.85	259.8	21.769	230.77	21.769
22.469	134.8	177.44	22.47	181.52	202.01	155.7	22.468	237.21	204.64	22.467	212.54	218.22	203.72	22.469	206.96	207.96	22.468	241.76	251.75	230.67	22.469	203.27	207.48	22.467	198.73	204.1	22.468	181.26	22.469	183.51	192.47	197.1	22.469	199.48	212.22	225.22	22.468	180.41	173.61	195.86	22.468	208.29	175.13	22.469	204.75	259.71	22.467	230.82	22.469
23.169	133.4	178.6	23.168	180.7	202.54	155.72	23.167	238.79	204.84	23.169	212.47	217.89	203.32	23.168	207.17	207.86	23.168	241.71	250.87	230.16	23.168	203.51	208.27	23.17	198.31	203.4	23.168	179.42	23.169	180.97	192.38	196.97	23.169	199.51	213.84	225.11	23.169	180.8	173.86	194.23	23.168	209.03	174.96	23.168	205.12	260.64	23.168	230.48	23.169
23.869	134.85	174.32	23.87	179.26	200.26	155.56	23.867	238.76	204.88	23.868	212.34	218.14	203.64	23.869	206.97	207.84	23.869	241.79	250.32	231.28	23.868	203.5	209.67	23.871	198.05	202.3	23.869	178.9	23.869	181.22	192.15	196.88	23.868	199.53	214.19	225.69	23.869	181.38	174.05	193.65	23.868	208.75	175.15	23.869	205.58	260.74	23.866	230.89	23.869
24.569	134.88	171.03	24.567	178.47	198.06	156.01	24.567	238.81	204.9	24.569	212.47	217.95	203.46	24.569	218.9	207.72	24.569	242.25	249	230.06	24.568	203.46	209.76	24.57	197.85	202.91	24.568	179.24	24.568	181.57	192.05	196.52	24.569	199.34	214.58	224.94	24.569	181.83	171.91	193.21	24.569	208.53	174.94	24.569	205.76	257.03	24.569	231.05	24.568
25.27	134.61	170.49	25.269	177.98	196.48	156.44	25.269	238.34	205.53	25.268	211.7	217.94	203.32	25.269	216.75	207.57	25.268	241.75	248.73	229.41	25.27	203.69	210.4	25.27	197.49	202.56	25.269	179.33	25.268	183.15	192.39	194.77	25.268	199.23	214.18	225.63	25.267	181.55	171.17	193.28	25.267	208.07	174.99	25.269	206.04	254.93	25.268	231.19	25.268
25.967	135.43	169.64	25.968	177.68	198.11	156.27	25.969	238.47	205.05	25.97	212.34	217.97	203.55	25.969	215.9	207.48	25.967	241.46	247.69	241.84	25.968	203.59	210.47	25.964	197.55	203.23	25.968	180.65	25.969	183.3	192.37	193.7	25.969	198.47	214.62	225.33	25.969	182.02	173.84	193.34	25.968	208.23	175.07	25.97	206.21	253.27	25.968	230.69	25.969
26.668	136.31	170.55	26.669	177.57	199.91	155.93	26.668	238.4	206.28	26.669	212.26	218.04	203.06	26.669	214.5	207.5	26.667	241.17	247.49	253.82	26.671	203.3	210.68	26.668	197.83	203.28	26.668	180.43	26.668	182.87	191.74	193.55	26.669	196.85	215.47	225.18	26.668	182.33	173.63	193.04	26.668	207.95	175.06	26.669	206.3	252.92	26.668	230.87	26.67
27.367	136.91	170.43	27.369	176.71	199.89	155.64	27.367	239.22	204.2	27.368	211.72	217.12	203.28	27.369	216.11	207.41	27.367	241.34	247.4	250.13	27.37	203.56	210.87	27.368	196.29	203.51	27.368	181.11	27.369	183.17	191.31	193.53	27.369	196.01	215.37	225.63	27.368	182.45	173.28	193.57	27.37	208.42	175.01	27.37	206.36	254.01	27.368	220.5	27.369
28.069	137.29	169.89	28.069	177.88	201.71	154.25	28.068	238.94	204.42	28.069	212.2	217.18	203.1	28.068	215.1	204.87	28.067	247.59	247.09	239.71	28.069	204.22	208.96	28.069	194.81	203.89	28.068	181.31	28.067	183.33	191.59	194.41	28.069	195.83	215.56	225.2	28.067	182.44	173.47	193.89	28.068	208.43	175.18	28.068	206.4	256.76	28.068	217.05	28.069
28.769	137.3	170.35	28.769	177.18	202.05	152.48	28.768	239.68	205.6	28.769	211.74	217.15	203.15	28.767	212.56	201.78	28.767	248.36	246.78	235.2	28.769	203.6	203.27	28.768	196.19	204.23	28.769	180.06	28.767	182.67	191.5	194.99	28.768	196.11	215.38	224.58	28.767	182.11	174.18	193.39	28.768	208.6	175.12	28.769	206.56	259.38	28.769	217.96	28.769
29.47	137.49	169.74	29.469	176.6	202.95	152.08	29.468	237.81	204.91	29.469	212.16	217.61	203.09	29.469	210.42	201.47	29.468	250.36	245.37	235.27	29.469	203.69	201.64	29.465	196.55	204.98	29.468	178.96	29.469	180.93	191.85	196.16	29.47	197.08	215.49	225.04	29.467	181.98	173.64	193.24	29.466	208.34	174.85	29.468	206.58	260.03	29.469	223.42	29.47
30.168	137.45	169.64	30.169	176.47	203.97	152.84	30.168	240.09	204.7	30.169	211.89	217.95	203.01	30.168	209.66	204.61	30.168	245.36	244.76	234.47	30.169	203.87	201.2	30.169	197.93	204.86	30.17	177.58	30.168	179.79	192.14	196.38	30.17	197.68	216.28	224.34	30.169	182.34	174.03	193.55	30.168	208.34	175.05	30.168	206.47	260.5	30.169	227.53	30.169
30.868	137.38	169.07	30.869	176.45	203.37	154.5	30.867	239.93	204.83	30.869	211.72	217.74	203.08	30.868	208.91	206.82	30.868	245.29	245.97	230.23	30.87	203.86	202.82	30.868	198.06	204.26	30.869	178.09	30.868	181.96	191.85	196.3	30.869	197.99	216.11	227.81	30.867	182.3	174.04	193.23	30.868	208.15	174.63	30.868	206.7	261.15	30.869	228.97	30.869
31.567	137.24	168.65	31.569	176.58	203.53	155.73	31.569	239.27	205.09	31.568	211.73	217.66	203.18	31.568	208.94	207.36	31.568	244.27	245.03	228.47	31.568	203.97	204.21	31.568	197.79	205.12	31.569	179.53	31.567	182.25	192.2	196.35	31.568	198.34	215.92	228.24	31.567	182.33	173.69	193.6	31.568	207.9	174.81	31.568	206.88	261.66	31.567	229.73	31.568
32.268	137.17	168.6	32.269	176	202.82	155.86	32.269	239.27	204.81	32.268	211.54	217.88	203.05	32.268	209.02	205.18	32.268	243.09	245.2	230.32	32.269	203.72	204.75	32.268	197.93	205.06	32.27	179.87	32.269	183.55	192.34	196.32	32.268	198.36	216.5	228.24	32.267	182.39	171.23	193.18	32.268	208.06	175.03	32.268	206.79	262.14	32.27	230.51	32.268
32.967	137.52	168.47	32.97	175.95	202.98	156.49	32.967	255.07	205.39	32.969	211.41	217.38	203.15	32.969	208.11	207.07	32.968	243	244.6	231.72	32.969	203.81	206.62	32.968	197.84	205.07	32.97	180.91	32.967	183.48	191.85	196.37	32.97	198.62	216.64	227.28	32.966	182.51	169.59	193.22	32.968	206.86	175.33	32.968	206.98	262.69	32.97	230.42	32.968
33.668	137.24	171.82	33.668	175.4	203.4	156.1	33.668	255.34	206.01	33.669	211.6	217.76	203.38	33.67	207.83	207.79	33.668	243.84	244.81	232.99	33.669	203.22	207.46	33.669	197.58	205.15	33.67	180.95	33.669	183.16	192.29	196.56	33.67	198.79	216.19	226.68	33.667	182.77	171.68	192.88	33.668	211.74	174.94	33.669	206.85	263.34	33.67	230.77	33.669
34.368	137.32	178.66	34.37	175.24	202.83	156.24	34.369	253.28	218.44	34.37	211.72	217.67	203.4	34.368	207.4	207.27	34.368	243.49	244.79	232.86	34.369	203.55	208.3	34.369	197.44	205.63	34.369	180.91	34.369	183.28	192	196.92	34.368	198.87	216.71	227.26	34.367	182.35	172.82	192.34	34.368	213.05	175.08	34.368	207.12	263.39	34.37	230.59	34.368
35.068	136.55	180.57	35.069	175.2	202.87	156.8	35.067	250.56	216.97	35.07	211.4	217.24	203.04	35.068	207.96	207.58	35.068	242.56	244.51	232.12	35.067	203.42	209.05	35.069	195.58	205.27	35.069	181.11	35.068	183.06	192.7	196.66	35.068	199.04	216.43	226.72	35.067	182.54	173.25	192.56	35.068	211.9	170.69	35.068	207.2	263.5	35.069	230.9	35.069
35.769	136.21	181.28	35.769	175.2	198.71	156.74	35.769	250.51	211.93	35.769	211.4	217.22	203.25	35.767	208.01	208.46	35.769	242.97	245.02	231.46	35.769	203.9	208.86	35.768	196.42	206.2	35.768	181.83	35.768	184.05	192.26	196.98	35.768	199.15	216.52	226.7	35.763	182.5	173.52	192.95	35.768	207.07	168.2	35.768	207.24	263.84	35.769	230.72	35.769
36.469	135.11	175.5	36.468	175.78	195.06	156.99	36.467	252.44	210.04	36.47	211.53	216.97	203.51	36.47	207.92	208.65	36.469	242.68	243.68	232.23	36.468	204.14	209.06	36.47	197.2	205.87	36.469	181.74	36.469	182.5	191.9	197.33	36.469	199.22	216.65	226.55	36.467	182.61	173.37	192.99	36.467	207.81	167.88	36.469	205.91	263.34	36.468	230.58	36.468
37.168	135.82	172.01	37.169	178.94	196.92	156.64	37.168	249.93	207.87	37.168	211.78	217.05	203.54	37.168	207.64	208.74	37.169	242.82	242.21	233.52	37.169	203.7	208.81	37.17	197.32	206.8	37.17	181.35	37.168	180.65	190.27	196.58	37.169	199.17	216.71	226.44	37.168	182.69	173.43	192.47	37.167	207.43	169.17	37.167	203.92	263.8	37.168	220.41	37.169
37.867	136.44	170.13	37.868	179.36	197.95	156.58	37.866	249.64	204.98	37.869	210.91	217	203.41	37.868	208.03	208.85	37.867	242.81	255.06	233.11	37.868	203.48	209.24	37.87	198.08	210.96	37.869	181.2	37.868	180.88	190.49	197.02	37.867	199.22	217.03	226.25	37.868	182.58	173.5	192.35	37.868	207.35	170.87	37.868	201.64	264.12	37.869	216.73	37.87
38.569	136.71	170.1	38.567	179.68	201.28	156.74	38.567	246.07	202.74	38.57	211.33	217.17	203.03	38.568	207.7	209.04	38.568	243.13	262.49	233.01	38.569	203.86	209.46	38.57	198.23	211.17	38.567	181.38	38.568	181.82	190.88	197.07	38.569	199.41	216.51	226.06	38.567	182.72	173.3	192.08	38.568	207.83	172.18	38.568	200.24	263.47	38.569	219.33	38.568
39.268	137.46	170.15	39.267	181.02	201.23	156.05	39.268	242.43	203.5	39.269	211.73	217.13	202.77	39.268	208.2	208.92	39.268	242.41	259.98	233	39.269	203.75	209.38	39.268	198.17	205.96	39.269	181.25	39.268	183.16	191.99	196.64	39.268	199.28	215.58	225.64	39.267	182.94	170.87	191.8	39.268	208.26	173.2	39.267	199.89	258.21	39.269	224.65	39.268
39.97	137.87	169.76	39.963	181.54	202.72	156.19	39.967	245.98	203.05	39.97	211.35	217	203.14	39.968	208.24	209.23	39.969	241.71	254.27	232.84	39.968	203.84	208.98	39.968	197.51	205.21	39.967	181.18	39.97	183.49	191.99	196.78	39.969	199.51	213.84	225.67	39.967	182.99	169.2	192.33	39.967	208.08	173.87	39.967	201.18	255.71	39.967	227.47	39.969
40.669	137.71	169.66	40.668	179.46	202.76	156	40.667	242.92	203.74	40.67	211.81	216.37	202.71	40.669	208.05	209.33	40.667	241	251.91	232.69	40.668	203.53	209.69	40.668	197.53	204.23	40.669	180.29	40.669	183.35	192.46	196.49	40.668	199.38	211.41	225.34	40.669	182.77	171.59	192.22	40.667	208.37	174.22	40.669	203.23	253.09	40.668	228.88	40.669
41.369	137.98	169.37	41.368	179.31	203.68	156.49	41.368	242.22	203.23	41.37	211.1	216.44	203.08	41.369	207.93	209.18	41.366	240.4	251.75	233.2	41.369	198.42	209.13	41.369	197.63	203.76	41.37	177.42	41.37	183.44	192.68	196.4	41.37	199.35	209.83	225.45	41.367	182.93	172.8	193.56	41.368	208.05	174.83	41.369	204.95	255.74	41.368	229.57	41.369
42.069	137.83	169.57	42.068	178.06	203.36	156.56	42.068	240.75	202.7	42.068	211.13	216.81	203.41	42.069	207.82	209.4	42.068	240.83	252.22	240.75	42.07	196.78	208.82	42.069	197.7	202.05	42.069	176.39	42.07	183.09	192.47	196.34	42.069	199.52	209.88	225.63	42.067	182.84	172.62	196.39	42.069	207.41	175.02	42.067	205.55	257.05	42.068	229.95	42.07
42.768	137.83	169.6	42.767	177.11	202.86	156.5	42.767	240.43	203.55	42.768	212.02	216.4	203.88	42.767	207.93	209.4	42.768	241.38	250.82	247.22	42.769	195.62	209.11	42.769	197.67	201.93	42.768	176.32	42.77	183.26	192.08	196.53	42.767	199.12	211.2	224.96	42.767	182.69	173.35	198.6	42.768	208	175.12	42.769	205.73	259.31	42.768	230.02	42.77
43.469	137.46	169.34	43.468	177.18	201.4	156.21	43.467	240.67	204.14	43.468	211.86	217.14	213.82	43.47	207.66	209.02	43.468	241.88	249.35	243.15	43.469	194.77	209.8	43.469	198.16	202.25	43.468	177.42	43.469	183.39	192.32	196.35	43.469	199.42	213.05	225.59	43.467	182.67	173.53	196.48	43.467	207.02	175	43.468	205.68	261.28	43.468	230.08	43.469
44.169	137.54	169.69	44.168	177.07	200.8	155.77	44.168	239.82	203.68	44.169	211.98	212.8	213.7	44.168	215.55	208.85	44.168	241.59	251.01	232.71	44.169	197.93	209.73	44.169	196.55	201.91	44.168	178.29	44.167	183.02	192.28	196.69	44.169	198.32	213.61	224.93	44.17	181.68	173.43	195.85	44.167	207.72	175.26	44.168	206.53	262.26	44.168	229.99	44.169
44.869	137.34	169.89	44.869	177.14	199.25	156.05	44.867	240.59	204.46	44.868	211.17	211.4	208.93	44.869	218.42	208.91	44.868	241.9	260.38	233.48	44.869	199.65	209.84	44.869	195.73	203.59	44.868	179.99	44.867	183.51	192.26	196.52	44.867	196.51	214.24	225.5	44.868	176.05	173	194.58	44.869	207.35	175.19	44.867	207.02	262.3	44.868	230.05	44.869
45.569	137.48	170.06	45.569	176.22	200.41	156.21	45.568	240.21	204.98	45.568	209.88	215.99	203.18	45.569	215.31	208.97	45.567	241.16	260.62	239.17	45.568	199.5	210.13	45.568	195.08	203.45	45.57	179.79	45.567	183.59	192.46	196.63	45.567	194.97	214.37	225.83	45.568	173.54	172.59	194.33	45.568	207.28	175.5	45.568	207.48	262.65	45.567	229.94	45.569
46.27	137.42	170.29	46.269	176.08	203.01	155.87	46.268	239.51	204.5	46.268	214.94	217.93	201.23	46.268	213.51	208.82	46.269	240.93	258.92	240.91	46.268	200.13	210.54	46.269	196.82	203.57	46.269	180.29	46.269	183.78	192.27	196.75	46.268	195.22	214.52	226.01	46.267	176.27	170.37	194.11	46.268	206.59	175.66	46.27	207.74	263.42	46.268	222.05	46.269
46.97	137.68	170.03	46.968	176.47	202.79	156	46.968	239.89	204.59	46.968	216.85	218.83	202.66	46.97	211.71	208.64	46.968	240.83	254.37	238.7	46.97	200.48	210.66	46.969	197.62	204.04	46.969	180.88	46.969	183.73	192.21	196.29	46.968	195.88	214.58	224.87	46.969	178.88	169.54	193.48	46.969	206.46	175.5	46.97	207.84	263.88	46.967	216.42	46.969
47.669	137.53	169.49	47.668	179.29	203.15	156.19	47.668	239.48	204.35	47.668	217.89	219.31	203.19	47.668	210.88	208.53	47.667	240.39	253.69	238.3	47.668	200.92	210.48	47.668	198.65	203.95	47.668	180.83	47.668	183.77	191.97	196.24	47.67	196.48	214.71	225.28	47.668	180.24	172.53	193.79	47.667	205.95	175.54	47.669	208.16	264.41	47.669	216.71	47.67
48.368	137.99	169.88	48.369	179.17	202.69	156.08	48.368	239.88	203.85	48.369	217.62	218.69	203.5	48.369	209.77	208.33	48.368	240.99	253.41	238.55	48.369	201.32	210.16	48.369	198.67	204.35	48.368	180.71	48.369	183.86	192.59	196.66	48.368	197.18	215.33	225.21	48.368	180.18	172.44	193.81	48.368	206.3	175.78	48.364	208.36	264.22	48.367	222.84	48.369
49.067	137.66	169.23	49.068	180.83	202.73	155.84	49.067	239.3	204.5	49.068	217.18	218.36	203.5	49.068	215.18	208.32	49.068	241.04	252.35	230.37	49.068	201.72	209.83	49.069	198.02	204.98	49.07	178.07	49.069	183.42	192.48	196.58	49.069	197.82	216.03	225.18	49.067	180.18	172.73	193.35	49.069	205.42	175.83	49.069	207.79	260.72	49.067	225.55	49.071
49.768	137.58	169.07	49.767	180.48	202.65	155.92	49.768	239.23	204.52	49.769	217.57	218.04	203.17	49.768	212.69	208.18	49.768	240.33	250.46	228.36	49.769	201.2	210.25	49.77	197.6	204.53	49.769	176.22	49.769	180.98	192.56	196.56	49.767	198.08	215.58	225.2	49.768	181.11	172.61	194.11	49.769	206.6	175.51	49.768	208.54	257.69	49.767	227.96	49.768
50.468	137.73	170.97	50.469	179.2	202.43	156.03	50.468	239.41	203.53	50.47	217.63	217.58	203.42	50.468	210.07	208.14	50.468	240.4	250.04	233.64	50.469	201.63	210.95	50.468	197.43	204.41	50.469	176.67	50.469	180.5	191.53	196.37	50.469	197.81	216.29	225.12	50.468	181.29	172.93	193.53	50.467	205.85	175.77	50.468	208.58	255.33	50.467	228.19	50.47
51.168	138.24	177.81	51.169	179.41	202.55	155.62	51.168	239.56	204.7	51.17	216.88	217.13	203.03	51.168	208.63	207.91	51.168	240.33	249.52	232.45	51.169	201.78	210.41	51.168	197.43	204.62	51.169	177.18	51.167	179.39	191.27	196.35	51.17	197.89	216.2	225.06	51.168	181.07	172.86	194.01	51.167	206.32	176	51.167	208.68	256.2	51.168	228.77	51.17
51.868	137.63	179.5	51.869	177.58	202.4	155.88	51.867	239.69	204.31	51.87	216.81	216.92	203.12	51.867	208.5	207.02	51.868	244.56	248.49	231.87	51.869	201.92	210.84	51.869	197.75	205.04	51.869	178.29	51.867	180.11	190.54	196.5	51.87	198.31	216.52	224.95	51.868	181.47	172.84	193.61	51.866	206.14	175.98	51.867	208.29	257.39	51.869	229.34	51.87
52.568	135.71	179.31	52.568	177.17	202.72	155.42	52.568	239.22	203.93	52.57	216.94	216.87	203.53	52.567	207.98	202.95	52.569	247.07	247.67	231.89	52.567	201.82	211.31	52.568	197.17	205.2	52.569	179.67	52.568	182.15	190.43	196.14	52.57	198.72	216.11	224.9	52.568	181.88	173.02	193.43	52.568	206.62	175.66	52.568	207.49	260.16	52.57	229.2	52.569
53.268	133.49	181.05	53.268	176.82	201.84	155.57	53.267	238.36	209.45	53.268	216.81	216.82	203.61	53.269	207.65	201	53.268	248.65	247.64	233.8	53.268	202.08	211.38	53.268	196.06	205.62	53.27	180.12	53.268	183.3	191.17	195.87	53.27	198.76	216.67	224.84	53.268	181.96	172.24	193.23	53.268	211.79	175.48	53.268	207.64	261.01	53.268	229.05	53.269
53.968	133.85	177.12	53.969	176.74	202.91	155.34	53.968	239.53	216.75	53.968	216.83	217.25	203.85	53.968	207.15	201.13	53.969	251.96	247.2	233.71	53.968	201.95	211.09	53.968	196.33	205.31	53.969	180.46	53.969	183.28	191.98	194.89	53.97	199.03	216.41	224.94	53.968	181.96	171.91	193.46	53.969	214.65	170.28	53.969	207.91	262.33	53.968	229.17	53.97
54.669	135.04	173.79	54.669	176.38	202.55	155.62	54.667	239.04	215.47	54.67	216.99	216.45	204.73	54.668	215.94	202.02	54.668	247.6	246.94	233.64	54.669	201.97	211.13	54.668	197.06	205.73	54.669	180.66	54.667	182.94	191.79	194.31	54.67	199.08	216.08	224.9	54.667	182.05	171.21	192.9	54.668	215.47	168.61	54.667	208.42	262.3	54.67	229.11	54.67
55.367	134.79	171.42	55.369	176.34	201.98	155.56	55.369	238.1	210.56	55.369	216.4	217.14	204.56	55.368	214.42	202.52	55.369	245.98	246	234.03	55.369	201.73	210.97	55.368	198.13	205.76	55.369	180.78	55.367	183.74	191.49	193.71	55.368	199.14	216.21	225.15	55.368	182.22	173.31	193.18	55.367	211.94	167.52	55.368	209.02	263.01	55.368	229.43	55.37
56.068	135.23	171.66	56.069	176.46	202.1	155.63	56.066	239.2	207.17	56.069	216.43	216.91	204.58	56.068	211.69	203.54	56.069	249.21	245.94	232.46	56.069	202.17	210.24	56.07	198.03	205.08	56.069	180.9	56.067	183.8	192.01	193.48	56.067	199.29	216.59	224.77	56.068	182.55	172.98	192.69	56.069	207.01	170.02	56.069	209.16	263.32	56.069	224.12	56.068
56.768	136.39	171.69	56.769	175.87	201.98	155.67	56.766	256.82	205.53	56.77	216.25	217.12	204.1	56.769	208.52	205.55	56.769	249.44	245.46	232.27	56.767	202.25	209.13	56.768	198.32	206.06	56.77	180.71	56.768	181.71	191.97	193.68	56.768	199.55	216.9	225.33	56.768	182.24	172.6	192.63	56.769	207.31	172.89	56.768	209.18	264.15	56.768	216.2	56.768
57.468	137.14	171.53	57.469	176.15	201.9	153.88	57.467	254.86	202.23	57.47	215.9	217.04	204.64	57.467	208.1	206.14	57.47	245.04	245.34	232.4	57.471	201.96	209.64	57.469	198.56	206.46	57.471	179.64	57.47	180.92	192.26	194.54	57.468	199.34	216.63	224.67	57.467	182.02	172.78	191.46	57.47	207.24	173.74	57.468	209.34	264.3	57.469	216.35	57.469
58.169	137.52	171.75	58.167	176.12	202.06	153.05	58.167	249.92	203.07	58.17	215.62	216.86	204.83	58.167	207.87	206.64	58.171	243.42	245.45	231.25	58.169	201.84	209.82	58.168	197.96	205.9	58.17	176.99	58.167	182.19	192.54	194.57	58.168	199.43	216.76	225.1	58.167	180.46	173.19	192.05	58.169	206.56	174.34	58.168	209.35	264.53	58.169	222.58	58.169
58.868	137.85	171.02	58.867	175.85	202.31	152.66	58.867	247.17	203.18	58.87	215.55	216.66	204.23	58.867	207.38	206.47	58.869	243.09	245.29	231.91	58.869	201.77	210.16	58.868	198	206.33	58.869	175.89	58.868	183.03	192.67	194.58	58.868	199.4	216.96	224.17	58.867	175.96	173.31	197.06	58.868	207.3	174.95	58.869	209.56	265.02	58.869	226.21	58.868
59.567	137.76	171.54	59.569	175.94	201.69	153.01	59.567	244.45	202.41	59.57	215.87	216.61	204.55	59.567	206.81	206.5	59.571	242.36	245.39	230.97	59.567	202.08	210.16	59.568	198.35	205.82	59.567	176.22	59.568	183.54	192.32	195.09	59.568	199.35	216.54	224.47	59.568	176.56	173.01	198.73	59.568	208.03	175.01	59.568	209.27	265.44	59.569	227.25	59.569
60.268	137.88	171.16	60.268	175.29	201.85	153.9	60.267	248.23	202.15	60.269	215.52	216.36	204.54	60.267	206.93	207.4	60.269	242.7	245.6	230.75	60.267	202.2	210.27	60.27	198.16	206.35	60.263	177.45	60.268	183.01	192.8	195.35	60.267	199.53	217.1	224.81	60.268	178.45	173.38	196.89	60.268	208.52	175.22	60.267	209.12	265.85	60.269	227.8	60.268
60.969	138.22	170.73	60.968	178.69	201.54	155.2	60.968	251.55	201.48	60.97	215.26	216.73	204.99	60.968	206.28	207.7	60.97	242.62	245.48	230.05	60.967	202.09	210.31	60.965	198.09	206.44	60.968	178.92	60.968	182.74	191.87	194.65	60.969	199.26	216.4	225.1	60.969	179.6	173.12	196.13	60.968	207.76	175.43	60.967	208.16	265.99	60.967	228.23	60.97
61.669	138.58	170.83	61.669	181.38	197.01	155.73	61.667	248.79	201.39	61.67	215.02	216.43	204.68	61.669	205.92	207.83	61.668	242.98	245.36	229.81	61.669	201.77	210.95	61.669	197.9	206.27	61.668	180.24	61.667	182.77	191.08	194.67	61.669	199.42	217.28	224.31	61.669	179.81	172.86	194.85	61.668	207.12	175.52	61.667	207.76	266.18	61.67	228.21	61.668
62.369	138.22	170.23	62.369	181.17	196.42	156.14	62.367	250.84	201.24	62.37	215.05	216.28	204.28	62.368	205.91	207.77	62.369	242.03	244.34	230.54	62.369	201.83	210.57	62.37	197.86	206.8	62.368	180.21	62.369	183.27	191.12	194.3	62.368	197.63	216.76	225.14	62.369	180.67	169.92	193.55	62.364	207.9	175.46	62.367	208.03	266.41	62.369	228.65	62.37
63.067	138.3	170.77	63.069	181.44	197.58	156.07	63.067	246.56	201.17	63.07	214.37	216.14	204.71	63.067	205.7	208.09	63.067	241.83	244.97	228.21	63.069	201.96	208.86	63.069	197.3	206.85	63.068	180.23	63.068	182.95	191.48	194.53	63.067	197.17	217.07	224.76	63.069	180.91	169.07	193.75	63.068	207.87	175.27	63.067	207.96	266.44	63.068	228.28	63.07
63.769	138.11	170.41	63.767	181.75	201.03	156.49	63.768	245.62	202.07	63.769	214.73	215.4	204.68	63.767	205.91	208.31	63.768	240.95	244.38	228.69	63.768	201.04	201.04	63.768	196.83	206.48	63.767	180.13	63.769	181.18	191.85	193.97	63.77	196.44	217.55	225.15	63.767	181.4	171.24	193.55	63.769	207.36	174.91	63.769	208.48	265.93	63.768	228.39	63.769
64.468	137.97	170.97	64.468	181.74	201.36	156.8	64.468	244.18	201.81	64.469	214.54	211.12	204.54	64.468	206.66	208.51	64.468	241.21	244.13	228.93	64.469	197.58	195.76	64.47	197.77	206.12	64.467	180.29	64.467	179.22	191.76	193.68	64.469	196.64	217.48	224.89	64.468	181.41	172.16	193.92	64.468	206.84	174.82	64.468	209.36	266.28	64.468	228.48	64.47
65.168	138.24	170.45	65.167	179.96	203.47	156.25	65.167	242.41	202.1	65.167	211.68	210.19	214	65.17	206.51	208.48	65.168	241.72	258.92	228.74	65.169	197.05	196.35	65.168	198.19	206.4	65.169	180.48	65.167	179.23	191.97	194.01	65.17	197.16	217.42	223.95	65.167	181.22	171.69	193.68	65.169	207.38	175.04	65.168	209.05	266.19	65.167	228.19	65.17
65.868	138.23	170.55	65.867	179.15	203.88	156.49	65.869	249.17	203.66	65.868	211.77	215.82	213.87	65.869	206.71	208.61	65.868	240.79	262.31	229.29	65.868	200.22	198.81	65.87	198.51	206.62	65.869	180.69	65.867	180.23	192.15	195.07	65.869	197.91	217.7	224.21	65.868	181.36	172.49	193.06	65.869	205.7	175.09	65.867	208.92	266.05	65.867	228.48	65.87
66.568	138.09	170.49	66.567	177.79	204.14	156.46	66.569	250.93	203.98	66.567	210.41	217.86	210.29	66.569	207.15	208.79	66.568	240.65	257.53	230	66.568	200.55	199.05	66.568	198.25	206.17	66.569	180.33	66.567	181.81	191.94	195	66.569	198.21	217.72	224.26	66.569	181.36	172.86	193.68	66.569	213.2	174.91	66.569	208.89	265.93	66.568	224.59	66.57
67.267	138.11	169.9	67.269	177.35	203.8	156.26	67.269	250.83	202.78	67.268	210.85	218.25	204.79	67.268	207.14	208.75	67.27	241.17	253.66	230.15	67.268	200.88	200.97	67.267	198.35	206.37	67.268	180.52	67.267	182.91	191.92	195.43	67.268	198.44	217.95	224.51	67.268	181.7	172.95	193.36	67.268	214.5	174.74	67.268	209.17	265.93	67.267	216.02	67.27
67.967	138.05	169.67	67.969	177.09	204.06	155.93	67.967	247.26	202.97	67.968	214.85	219.09	202.48	67.968	206.88	208.76	67.969	240.9	251.6	240.64	67.968	201.44	203.3	67.968	198.29	206.43	67.97	180.38	67.967	182.89	191.89	195.4	67.97	198.62	218.04	224.02	67.969	181.97	172.57	193.15	67.969	213.27	174.77	67.97	209.17	261.82	67.968	215.36	67.969
68.667	138.13	169.49	68.669	176.27	203.67	156.12	68.668	244.32	203.67	68.668	217.28	218.62	201.88	68.669	206.91	208.83	68.668	245.01	251.06	254.42	68.668	201.6	203.49	68.668	198.28	209.88	68.669	180.22	68.668	183.06	191.86	195.38	68.669	198.88	217.57	224.16	68.669	182.02	172.42	192.8	68.669	207.14	174.93	68.668	209.47	258.74	68.667	220.65	68.669
69.363	138.01	169.54	69.368	176.49	203.44	156.46	69.369	242.89	203.12	69.368	217.16	218.02	203.06	69.369	206.94	208.64	69.368	248.88	249.74	255.34	69.369	201.94	204.35	69.368	198.27	213.51	69.368	180.24	69.368	183.59	191.6	195.32	69.366	199.03	217.46	224.21	69.369	182.2	170.99	193.31	69.368	207.63	174.99	69.37	208.77	253.95	69.367	224.54	69.37
70.068	138.13	169.62	70.067	177.09	202.96	156.04	70.069	241	203.41	70.068	217.41	218.1	203.61	70.069	206.96	208.17	70.068	250.71	248.75	251.57	70.069	201.9	205.49	70.068	198.23	209.33	70.065	180.06	70.067	183.57	190.94	195.45	70.068	198.95	217.83	224.46	70.066	182.3	171.45	193.5	70.069	207.36	175.1	70.069	208.9	255.1	70.067	226.62	70.07
70.769	138.46	169.76	70.768	176.65	202.98	156	70.768	241.42	203.04	70.768	217.1	217.89	203.43	70.77	207.05	208.27	70.768	250.43	248.96	238.8	70.769	202.07	206.52	70.768	196.49	204.73	70.769	177.99	70.767	182.48	189.22	195.43	70.769	198.96	215.5	224.35	70.767	182.52	172.99	192.84	70.767	207.1	175.11	70.77	208.94	256.87	70.767	227.57	70.769
71.468	138.26	169.95	71.47	176.88	203.21	155.83	71.47	240.21	202.72	71.467	217.33	217.05	203.43	71.468	206.92	208.19	71.468	251.79	248.69	234.44	71.469	202.19	207.14	71.469	196.15	204.18	71.469	174.65	71.468	180.59	188.89	195.6	71.469	199.21	213.46	224.2	71.468	182.55	172.38	193.11	71.468	206.71	175.21	71.467	208.97	259.28	71.469	228.35	71.471
72.169	138.41	170.06	72.168	176.56	203.26	155.97	72.169	240.14	203.07	72.168	217.03	217.31	203.1	72.17	206.61	207.66	72.168	255.41	249.66	235.24	72.169	201.96	207.43	72.17	198.23	203.9	72.165	176.12	72.168	180.46	188.71	195.62	72.169	199.25	212.23	225.01	72.168	182.6	173.14	192.81	72.168	207.58	175.43	72.169	208.57	261.28	72.168	228.49	72.169
72.869	138.05	170.41	72.87	176.32	203.13	155.83	72.869	239.53	203.52	72.868	217.3	216.45	203.34	72.869	206.68	207.55	72.87	252.48	258.61	235.09	72.868	202.21	207.4	72.869	198.1	204.47	72.866	176.95	72.868	180.28	190.18	195.44	72.865	199.34	211.27	224.23	72.869	182.64	172.98	192.5	72.864	207.94	175.32	72.868	208.58	263.41	72.867	228.25	72.87
73.569	138.4	170.31	73.569	176	202.81	156.06	73.569	239.87	203.42	73.57	217.34	216.38	203.54	73.569	206.6	207.72	73.567	245.42	256.53	236.58	73.568	202.13	207.46	73.568	198.63	204	73.57	177.96	73.569	181.78	190.33	195.26	73.57	199.47	213.14	224.29	73.567	182.55	173.08	191.85	73.568	207.61	175.15	73.568	208.21	264.01	73.568	227.93	73.569
74.268	135.55	175.74	74.269	175.97	202.22	156.48	74.269	239.41	204.75	74.268	216.78	216.5	203.54	74.269	206.34	207.95	74.268	243.51	258.42	236.47	74.267	202.3	208.02	74.267	198.69	204.14	74.269	179.06	74.268	182.52	190.92	195.29	74.27	199.58	213.71	226.65	74.267	180.37	172.92	192.34	74.268	208.12	174.93	74.268	208.35	264.64	74.267	228.08	74.269
74.968	133.75	178.48	74.968	176.21	200.88	156.45	74.969	238.39	217.02	74.969	216.4	216.35	203.16	74.968	206.43	207.46	74.968	242.93	254.12	236.33	74.967	202	207.87	74.967	199.09	204.43	74.969	179.83	74.967	182.92	191.24	195.12	74.969	199.43	214.59	228.49	74.967	175.12	172.99	192.03	74.968	206.94	175.27	74.968	208.69	264.3	74.967	228.14	74.968
75.669	133.18	178.81	75.668	175.39	197.37	155.92	75.669	239.43	215.47	75.668	215.73	214.98	203.33	75.668	207.26	207.81	75.668	242.93	253.43	234.76	75.668	202.12	208.23	75.667	198.43	205.1	75.665	180.16	75.667	183.12	191.44	195.42	75.669	199.67	214.59	228.86	75.669	175.04	173.03	191.74	75.667	207.1	175.12	75.668	208.56	264.6	75.665	228.13	75.668
76.369	133.76	180.32	76.369	178.55	197.41	155.94	76.369	244.31	213.45	76.369	216.46	212.3	203.3	76.369	208.74	207.44	76.368	243.51	253.93	236.06	76.367	202.32	208.9	76.367	198.46	205.45	76.369	180.33	76.367	182.58	192.01	195.51	76.369	199.58	214.87	229.6	76.368	177.73	172.9	191.43	76.369	206.85	175.19	76.369	208.62	265.09	76.367	220.56	76.368
77.069	134.63	177.73	77.069	179.93	200.38	155.52	77.068	262.16	208.34	77.068	215.83	213.74	203.22	77.069	208.24	207.49	77.069	243.05	252.53	235.38	77.068	202.06	208.85	77.067	198.95	205.97	77.069	180.21	77.067	182.73	192.01	195.75	77.069	199.57	214.62	227.86	77.069	179.84	171.01	191.32	77.069	206.6	175.11	77.068	208.6	265.15	77.068	214.05	77.068
77.769	136.32	174.33	77.77	181.06	201	155.6	77.769	258.87	209.97	77.767	216.06	217.64	203.57	77.768	206.94	207.9	77.768	242.73	251.16	235.36	77.767	202.08	208.91	77.767	198.34	206.12	77.77	178.87	77.768	182.85	192.43	195.58	77.769	199.53	214.93	226.92	77.766	179.68	169.22	191.39	77.767	206.05	175.02	77.767	204.9	265.99	77.767	215.35	77.769
78.469	136.16	173.52	78.467	181.82	203.38	155.98	78.467	256.73	204.41	78.467	216.04	218.22	203.05	78.468	206.56	207.9	78.469	243.11	249.78	235.25	78.467	202.41	209.12	78.468	197.4	206.66	78.47	176.98	78.468	182.63	192.01	194.45	78.469	199.85	215.87	227.48	78.468	180.34	172.42	191.6	78.468	206.78	175.3	78.469	201.87	266.57	78.467	221.56	78.467
79.17	135.72	173.18	79.167	181.3	202.8	156.16	79.167	253.49	210.44	79.169	216.35	217.96	202.79	79.17	206.73	208.03	79.169	243.18	249.85	234.58	79.168	202.11	208.8	79.168	195.88	206.69	79.163	176.37	79.167	182.77	191.9	193.72	79.17	199.68	216.09	227.28	79.168	180.51	172.03	191.45	79.168	206.72	175.33	79.17	200.21	266.47	79.169	224.92	79.169
79.864	137.04	172.32	79.868	179.38	203.57	155.13	79.868	250.71	209.33	79.868	215.72	218.3	202.29	79.869	206.39	207.94	79.868	242.45	248.73	233.6	79.868	202.42	208.46	79.869	196.12	206.95	79.869	176.96	79.869	182.94	192.01	193.46	79.87	199.65	216.32	226.78	79.867	181.38	172.44	191.56	79.863	205.58	175.28	79.87	200.17	265.98	79.868	226.64	79.868
80.568	138.09	173.03	80.569	179.19	203.61	155.88	80.568	248.16	208.1	80.568	215.48	217.84	202.15	80.569	206	208.13	80.57	241.57	248.65	234.15	80.569	202.15	208.78	80.569	197	207.39	80.568	177.24	80.568	183.08	192.44	193.07	80.568	199.78	216.48	226.95	80.567	181.19	172.54	191.22	80.567	205.8	175	80.57	199.99	266.1	80.567	227.44	80.569
81.269	137.83	173.36	81.267	177.78	203.79	155.9	81.269	246.93	207.03	81.268	215.34	217.62	202.4	81.269	206.06	208.15	81.27	241.91	248.79	232.62	81.267	202.27	208.52	81.269	197.65	207.8	81.268	178.23	81.27	183.11	191.7	192.83	81.268	199.73	216.63	226.62	81.267	181.25	172.67	194.08	81.267	205.72	174.79	81.268	200.79	262.85	81.267	227.82	81.269
81.97	137.85	172.87	81.969	177.73	203.6	156.06	81.968	245.6	202.63	81.969	215.28	217.08	202.09	81.97	206.46	207.86	81.97	241.66	248.26	242.51	81.968	202.35	208.81	81.969	198.48	207.52	81.968	179.34	81.968	183.4	191.81	193.39	81.97	199.65	216.53	226.15	81.968	181.46	172.78	196.92	81.969	205.89	175.05	81.968	203.68	259.62	81.969	228.03	81.969
82.67	138.4	172.92	82.667	177.19	203.87	156.2	82.669	243.24	203.24	82.669	215.63	217.2	202.11	82.668	206.4	207.6	82.669	242.22	248.21	251.28	82.669	202.32	208.14	82.669	198.48	207.14	82.668	180	82.67	183.45	191.06	193.81	82.668	199.44	216.6	225.89	82.668	181.57	172.76	198.14	82.667	205.67	174.97	82.669	205.65	258.73	82.669	228	82.669
83.368	139.12	173.07	83.369	176.29	203.35	156.16	83.368	242.7	203.21	83.368	214.79	217.31	202.24	83.369	206.14	207.3	83.368	242.27	246.73	249.88	83.368	202.42	208.36	83.369	198.67	206.56	83.364	179.81	83.368	183.73	190.97	194.92	83.37	199.37	217.13	225.97	83.368	181.72	172.37	196.04	83.369	205.7	175.06	83.369	206.61	258.71	83.367	227.39	83.369
84.068	139.19	172.66	84.069	176.43	203.44	155.74	84.068	242.2	208.37	84.069	214.33	217.09	202.42	84.069	205.55	207.67	84.068	241.26	246.16	239.24	84.07	202.31	207.75	84.069	198.86	209.62	84.069	179.84	84.068	183.96	190.76	195.01	84.067	197.56	216.81	225.96	84.068	182.04	171.72	196.24	84.067	205.91	175.22	84.069	207.23	261.79	84.067	227.58	84.068
84.769	139.61	172.57	84.769	176.12	202.84	155.49	84.769	250.42	204.59	84.767	214.45	217.09	202.42	84.77	206.04	207.42	84.767	241.37	252.81	237.55	84.769	202.4	208.05	84.769	198.8	213.1	84.768	180.01	84.768	183.69	190.91	195.41	84.769	196.28	217.04	225.21	84.767	181.83	170.87	194.65	84.767	205.03	175.15	84.769	207.37	263.64	84.768	219.39	84.768
85.469	139.21	172.06	85.469	176.5	203.33	155.95	85.469	258.42	202.78	85.467	214.57	216.62	202.61	85.47	208.83	207.54	85.468	240.52	261.22	236.35	85.469	202.72	207.76	85.47	198.44	205.44	85.468	178.89	85.469	183.38	190.73	194.56	85.468	195.41	216.89	225.6	85.469	182.4	173.48	194.32	85.468	205.21	174.85	85.468	206.91	263.86	85.466	214.62	85.469
86.17	139.26	172.18	86.168	180.76	202.87	155.9	86.168	258.84	205.65	86.167	213.9	216.92	202.23	86.168	216.97	207.47	86.168	241.23	259.94	238.01	86.168	202.54	207.76	86.169	198.55	205.71	86.168	176.92	86.168	182.54	191.38	193.29	86.168	196.08	217.49	225.27	86.168	182.28	173.33	194.29	86.169	205.02	175.07	86.168	207.29	264.27	86.168	216.72	86.17
86.869	139.34	172.1	86.869	181.97	199.82	155.82	86.868	252.32	203.59	86.868	213.92	216.62	202.3	86.869	215	207.37	86.868	241.19	253.78	234.66	86.868	202.54	208.2	86.868	197.87	203.77	86.864	176.1	86.868	179.98	191.54	193.22	86.864	196.51	216.93	224.99	86.867	182.76	173.15	193.9	86.864	204.98	175.15	86.869	207.51	264.28	86.866	221.9	86.869
87.569	139.14	172.23	87.568	182.06	195.56	155.89	87.569	249.5	202.75	87.568	213.88	216.61	202.29	87.569	212.27	207.33	87.568	240.67	251.99	235.11	87.569	202.74	207.87	87.57	197.93	203.34	87.568	177.84	87.568	179.29	191.52	193.25	87.568	197.21	217.02	225.14	87.568	182.82	172.93	193.98	87.567	205.3	175.42	87.569	207.8	264.89	87.569	225.53	87.569
88.27	139.49	171.96	88.268	182.48	198.21	156.22	88.268	246.11	203.27	88.267	214.33	216.95	202.31	88.268	210.78	207.21	88.268	239.36	250.65	233.78	88.269	198.21	205.68	88.268	197.85	203.42	88.269	177.85	88.268	178.45	191.32	193.31	88.268	197.89	217.08	224.76	88.268	182.18	172.91	193.53	88.269	205.18	175.16	88.268	207.95	265.75	88.266	226.22	88.269
88.97	139.53	172.27	88.968	179.49	200.02	156.2	88.968	244.27	203.91	88.969	214.05	216.46	202.22	88.969	210.22	207	88.967	239.53	249.13	234.15	88.969	195.6	196.36	88.969	197.3	203.24	88.969	178.04	88.97	180.03	191.53	194.53	88.97	198.22	217.26	225.18	88.968	177.86	172.96	193.57	88.97	205.42	175.22	88.969	208.13	265.81	88.968	226.5	88.968
89.668	136.38	173.52	89.669	178.38	200.26	155.9	89.668	243.86	203.62	89.668	213.57	216.91	201.99	89.67	210.05	207.4	89.668	240.5	249.35	235.49	89.669	194.56	194.63	89.668	195.72	202.63	89.668	179.47	89.668	181.99	191.69	195.15	89.669	198.59	217.1	224.89	89.668	175.38	173.23	193.15	89.669	205.09	175.31	89.669	207.96	266.2	89.669	227.24	89.668
90.37	135.43	179.37	90.369	178.2	200.01	155.87	90.368	242.06	203.83	90.37	213.58	211.78	205.52	90.369	210.85	207.22	90.367	242.21	248.14	236.36	90.37	197.07	199.26	90.369	197	203.01	90.368	180.84	90.368	181.52	191.81	194.69	90.369	198.4	217.18	224.99	90.368	177.42	173.17	193.56	90.364	205.68	175.18	90.369	208.24	266.5	90.368	227.57	90.368
91.069	134.79	180.8	91.068	177.45	200.35	156.25	91.067	242.39	204.55	91.069	213	209.99	214.66	91.069	210.99	207.41	91.067	249.17	248.5	235.14	91.069	198.65	199.31	91.069	197.86	202.57	91.067	180.72	91.068	181.45	191.64	194.6	91.068	198.69	217.18	227.46	91.069	179.66	172.94	193.66	91.067	205.03	175.25	91.069	207.93	263.34	91.07	227.57	91.07
91.768	136.02	180.4	91.768	177.66	202.73	156.05	91.768	240.88	204.06	91.769	212.96	213.06	212.63	91.769	209.16	207.41	91.767	250.4	247.76	233.46	91.77	200.65	199.3	91.77	197.32	203.09	91.767	180.63	91.77	181.85	191.66	193.66	91.769	198.71	217.02	228.05	91.767	180.2	171.18	193.27	91.768	205.48	175.14	91.769	208	258.83	91.768	227.19	91.769
92.467	136.55	181.61	92.469	177.15	202.87	155.96	92.468	240.85	203.94	92.469	212.36	217.62	204.91	92.468	208.47	206.27	92.468	245.57	247.07	234.36	92.469	200.78	200.33	92.465	198.55	203.64	92.47	180.09	92.468	182.11	191.49	193.45	92.469	198.72	217.09	228.41	92.466	180.44	170.28	193.08	92.466	204.99	174.94	92.47	208.26	255.69	92.468	227.3	92.47
93.169	136.81	177.17	93.17	176.92	203.58	155.25	93.167	240.61	204.48	93.168	212.12	217.34	202.08	93.167	207.61	206.84	93.168	245.55	247.32	234.13	93.168	200.24	202.03	93.169	198.15	202.88	93.169	179.78	93.168	182.15	191.42	192.71	93.168	198.66	217.22	226.92	93.168	180.53	171.78	193.23	93.168	205.71	174.82	93.168	208.52	257.32	93.169	223.96	93.17
93.867	136.99	173.95	93.87	176.84	203.38	152.53	93.869	240.79	203.91	93.869	208.9	217.58	201.09	93.868	207.03	206.76	93.869	242.26	253.66	233.64	93.87	200.27	201.91	93.87	198.21	206.51	93.868	179.86	93.868	182.13	191.41	194.78	93.866	198.57	217.27	226.74	93.868	181.08	173.46	192.84	93.862	205	175.05	93.867	208.53	258.9	93.869	215.39	93.87
94.569	137.78	172.93	94.57	176.63	203.69	152.24	94.567	240.3	203.45	94.569	208	217.43	201.67	94.568	207.29	204.65	94.569	241.46	258	233.92	94.568	200.44	202.28	94.569	198.57	209.21	94.568	180.01	94.568	182.63	190.63	194.49	94.569	198.83	217.08	225.99	94.566	181.67	172.8	192.92	94.568	205.22	175.32	94.568	208.65	260.6	94.568	214.78	94.569
95.269	138.55	172.86	95.27	176.3	203.51	153.37	95.269	239.61	203.89	95.269	207.81	217.54	202.46	95.267	206.91	201.23	95.269	241.19	253.38	233.87	95.264	200.58	203.57	95.27	198.24	203.56	95.269	179.99	95.269	183.22	190.31	195.14	95.269	198.84	217.34	226.4	95.266	181.56	172.53	192.67	95.268	205.34	175.18	95.267	207.05	262.68	95.269	219.16	95.269
95.969	139.19	173.09	95.969	176.34	203.92	155.56	95.967	240.21	204.22	95.968	212.83	217.04	202.75	95.967	206.9	199.81	95.969	241.96	250.01	233.24	95.969	200.95	205.05	95.968	198.17	203.89	95.97	179.63	95.97	183.22	190.34	194.73	95.97	199.03	217.36	226.88	95.966	181.52	172.33	192.7	95.967	205.2	175.26	95.967	203.65	263.74	95.969	223.21	95.97
96.668	139.43	172.65	96.668	176.29	203.69	156.44	96.668	240.14	204.67	96.67	215.98	216.84	203.01	96.669	206.45	199.93	96.669	241.68	249.2	232.94	96.666	201.15	205.45	96.67	198.08	203	96.669	179.78	96.669	182.9	190.72	195.07	96.671	198.83	217.15	226.24	96.667	181.61	173.01	192.48	96.667	207.73	175.34	96.669	200.51	264.23	96.669	225.37	96.671
97.369	139.42	172.98	97.369	176.02	204.16	156.38	97.37	246.44	207.29	97.369	216.65	217.26	202.8	97.367	205.95	201.96	97.367	241.7	249.09	232.86	97.365	201.29	205.66	97.368	196.72	203.31	97.371	177.01	97.369	183.04	190.61	194.52	97.363	198.88	217.21	226.5	97.367	181.86	173.27	192.72	97.362	214.22	175.23	97.368	200.05	264.17	97.37	226.05	97.37
98.068	139.35	172.32	98.068	174.06	200.97	155.39	98.069	260.66	214.89	98.069	217.81	216.59	203.07	98.068	205.96	203.96	98.067	241.82	247.73	232.57	98.07	201.24	206.52	98.069	195.92	202.63	98.069	174.97	98.069	182.88	190.37	195.17	98.067	199.26	217.09	225.72	98.068	181.81	173.29	192.11	98.068	214.94	175.03	98.068	201.35	264.22	98.07	226.78	98.07
98.768	139.26	172.7	98.77	173.95	200.37	154.45	98.769	256.86	215.9	98.769	217.8	217.14	202.97	98.767	205.61	205.44	98.767	242.06	248.12	241.39	98.765	201.21	207.15	98.769	198.44	202.72	98.77	174.58	98.769	183.07	190.8	195.35	98.767	199.1	217.28	225.61	98.766	181.87	173.25	192.81	98.768	212.46	175.06	98.769	203.31	264.29	98.77	227.1	98.77
99.468	139.16	172.48	99.47	173.82	200.64	154.82	99.467	250.38	214.58	99.469	217.15	216.7	203.13	99.468	204.96	205.16	99.468	241.8	248.29	251.04	99.469	201.68	207.21	99.469	197.74	202.51	99.471	176.67	99.469	182.89	191.13	192.97	99.467	199.08	217.41	225.52	99.468	181.87	171.64	192.15	99.467	207.39	175.16	99.468	204.87	264.48	99.469	227.21	99.468
100.168	139.51	172.32	100.168	173.38	200.64	154.41	100.167	247.17	212.65	100.169	217.08	216.68	203.07	100.169	205.1	205.39	100.17	242.17	248.47	254.98	100.169	201.29	207.59	100.169	198.15	201.83	100.171	178.57	100.168	182.21	191.17	192.77	100.168	199.04	218.1	225.08	100.167	181.97	171.48	192.68	100.168	207.19	175.52	100.168	205.83	265.19	100.17	227.5	100.168
100.868	139.17	172.42	100.87	173.71	200.81	154.04	100.869	244.6	212.31	100.869	217.55	216.55	203.16	100.868	204.74	205.45	100.869	241.82	248.1	248.11	100.869	201.58	207.87	100.87	198.52	201.99	100.87	179.09	100.868	180.4	190.75	192.99	100.868	199.08	217.93	225.41	100.867	182.03	172.08	191.88	100.863	205.72	175.56	100.868	205.87	265.08	100.869	227.37	100.868
101.569	139.38	172.1	101.57	173.39	199.73	154.52	101.569	241.93	211.65	101.57	216.97	216.82	202.99	101.568	204.95	206.05	101.567	241.56	247.6	234.92	101.569	201.58	207.75	101.569	198.63	202.51	101.569	179.48	101.57	179.38	190.89	194.04	101.567	199.11	214.3	225.25	101.567	182.22	173.18	193.85	101.567	206.56	175.55	101.568	206.3	262.52	101.569	223.94	101.568
102.269	139.83	171.94	102.268	176.76	197.72	154.25	102.267	243.83	211.19	102.27	217.22	216.36	202.89	102.268	205.15	206.38	102.269	240.83	255.13	234.93	102.268	201.65	208.29	102.269	198.81	202.46	102.27	180.09	102.269	177.99	189.24	194.54	102.269	199.21	212.29	225.24	102.268	182.12	173.19	197.91	102.268	206.93	175.99	102.27	206.89	256.76	102.271	214.89	102.268
102.968	140.17	171.98	102.969	178.8	192.25	154.24	102.967	249.42	208.04	102.969	216.77	217.04	202.58	102.968	204.93	206.62	102.969	241.23	260.34	234.88	102.968	202	208.17	102.969	198.15	202.89	102.968	180.72	102.969	179.19	190.17	194.71	102.969	198.87	209.3	224.78	102.968	182.6	172.42	197.99	102.968	206.85	175.84	102.969	206.72	253.42	102.969	214.33	102.97
103.67	137.14	171.55	103.667	179.42	194.25	154.82	103.668	249.21	206.48	103.669	216.44	216.93	202.52	103.668	205.01	206.58	103.669	240.94	258.67	235.37	103.669	201.67	207.69	103.671	198.09	206.24	103.67	180.85	103.669	180.23	189.69	195.14	103.669	198.97	209.73	225.36	103.669	182.43	172.14	197.26	103.667	207.75	175.57	103.669	207.14	253.1	103.669	218.71	103.67
104.368	134.92	171.9	104.369	179.24	197.94	154.23	104.368	247.63	205.12	104.37	216.02	216.46	202.12	104.367	204.57	207.09	104.368	243.77	252.7	235.68	104.369	201.99	206.42	104.37	198.37	209.37	104.368	180.82	104.369	181.09	190.08	195.23	104.369	199.11	210.88	225.12	104.368	180.78	172.38	196.23	104.369	207.62	175.6	104.368	207.38	253.11	104.369	224.16	104.37
105.069	135.29	180.42	105.069	181.52	201.5	154.55	105.067	246.05	203.86	105.07	215.48	216.66	202.55	105.069	204.62	207.2	105.062	246.68	251.4	235.81	105.069	201.87	204.29	105.07	197.69	205.83	105.07	180.97	105.069	181.49	190.55	194.92	105.068	199.11	211.97	224.7	105.068	175.15	172.76	194.93	105.068	207.26	175.73	105.068	207.35	257.36	105.068	225.46	105.068
105.769	134.61	180.96	105.769	180.97	200.89	154.18	105.768	243.3	205.02	105.768	215.93	216.63	202.79	105.768	204.61	207.21	105.767	249.05	251.15	236.57	105.769	202.05	203.24	105.769	195.69	204.32	105.769	180.56	105.768	181.33	190.86	195.2	105.769	199.02	213.47	224.43	105.768	174.77	170.77	193.58	105.768	207.4	175.52	105.768	207.26	259.07	105.768	226.01	105.77
106.469	135.49	181.74	106.468	178.02	200.69	154.77	106.468	242.65	204.95	106.47	215.26	216.73	202.56	106.468	204.47	207.31	106.467	252.07	255.49	235.84	106.469	201.8	204.12	106.469	197.09	203.18	106.469	180.47	106.469	181.44	191.14	194.12	106.468	198.88	214.22	224.57	106.468	178.19	170.42	193.35	106.468	207.19	176.08	106.469	207.43	260.82	106.469	226.86	106.469
107.17	136.25	180.19	107.168	175.58	201.15	154.47	107.168	241.98	206.15	107.168	215.1	216.64	202.22	107.17	204.63	207.32	107.168	253.63	253.72	241.25	107.168	201.63	205.06	107.17	198.58	202.03	107.168	180.52	107.169	181.83	191.25	193.2	107.169	199.04	214.17	225.02	107.169	179.58	171.75	193.81	107.168	206.55	176.03	107.169	207.37	261.53	107.169	227.03	107.169
107.868	136.74	182.34	107.868	175.23	201.42	154.73	107.868	242.82	207.24	107.87	215.03	216.5	202.27	107.87	205.04	207.54	107.868	253.64	253.64	244.62	107.869	201.85	205.93	107.87	198.24	202.42	107.87	180.48	107.868	181.87	191.27	193.36	107.863	198.95	214.77	225.54	107.869	180.05	174.14	193.83	107.863	206.2	176.17	107.868	207.52	262.22	107.869	227.48	107.868
108.569	136.45	184.91	108.569	174.98	201.73	154.33	108.567	241.69	206.86	108.568	214.66	215.92	210.04	108.57	204.69	207.32	108.568	248	251.13	239.75	108.57	201.71	206.07	108.57	199.06	202.86	108.57	180.49	108.568	182.22	191.33	193.32	108.569	199.04	215.17	228.12	108.567	180.26	173.09	193.48	108.568	206.83	175.68	108.568	207.84	262.82	108.569	227.26	108.569
109.269	137.99	181.35	109.27	175.37	201.88	154.39	109.267	242	211.17	109.269	214.85	215.77	213.72	109.269	204.87	207.52	109.268	246.72	251.62	240.71	109.269	201.71	206.52	109.268	198.64	202.43	109.269	178.64	109.268	182.07	191.43	194.71	109.267	199.51	215.59	227.96	109.268	180.61	172.6	194.5	109.268	207.44	171.45	109.267	207.85	262.91	109.269	227.36	109.269
109.969	138.7	177.34	109.968	174.93	201.54	154.66	109.967	241.56	216.94	109.968	215.1	210.95	210.34	109.969	204.71	207.08	109.967	244.47	252.39	237.5	109.965	201.76	206.93	109.969	198.97	202.21	109.969	175.92	109.968	182.25	191.02	195.53	109.969	197.77	215.73	228.7	109.968	180.73	172.43	194.28	109.969	214.78	168.1	109.968	207.72	263.36	109.968	221.35	109.969
110.669	138.94	175.26	110.668	174.49	202.09	154.66	110.668	241.47	215.19	110.669	214.82	210.21	203.68	110.67	205.03	207.47	110.667	243.51	251.67	238.99	110.67	201.93	207.01	110.669	198.31	202.24	110.67	175.15	110.667	182.44	189.58	194.94	110.67	195.48	216.04	228.06	110.67	181.32	172.5	193.73	110.667	215.09	166.85	110.668	207.8	263.77	110.669	214.02	110.669
111.368	139.34	174.7	111.368	174.3	202.12	154.65	111.368	241.42	212.05	111.368	214.91	214.03	201.96	111.368	204.95	207.34	111.368	243.34	250.9	237.52	111.37	201.68	207.57	111.368	197.91	202.13	111.369	176.39	111.367	182.16	189.97	195.22	111.364	194.02	216.21	226.17	111.368	181.5	173.09	193.14	111.368	214.21	167.65	111.37	207.67	264.84	111.368	214.24	111.37
112.068	139.45	173.96	112.068	173.89	201.58	154.65	112.068	240.6	206.79	112.068	214.41	216.62	200.44	112.068	216.41	202.19	112.067	248.3	249.65	233.53	112.07	201.65	207.41	112.069	197.86	202.38	112.07	178.01	112.068	182.06	190.16	195.14	112.068	195.68	216.35	226.16	112.069	181.43	172.94	193.43	112.069	209.11	169.34	112.068	207.04	265.18	112.069	218.88	112.07
112.768	139.43	173.42	112.768	176.82	202.09	154.6	112.767	240.24	204.93	112.768	214.59	217.44	202.34	112.768	216.59	200.93	112.767	249.42	249.19	234.89	112.771	201.78	208.43	112.768	197.8	201.97	112.769	178.59	112.768	182.16	190.43	195.05	112.768	195.89	216.66	226.64	112.767	181.63	173.11	193.22	112.769	207.86	170.86	112.768	206.68	265.21	112.767	223.09	112.77
113.469	139.37	173.77	113.47	178.35	200.82	154.81	113.467	239.48	206.23	113.468	214.86	217.85	202.97	113.468	212.57	200.84	113.467	249.55	248.69	233.76	113.469	201.4	208.21	113.468	197.74	202.98	113.468	179.52	113.469	182.95	190.96	195.01	113.47	196.12	216.25	226.77	113.468	181.62	172.94	192.69	113.468	206.35	172.27	113.467	204.37	265.65	113.469	224.5	113.471
114.168	139.98	173.34	114.169	180.34	201.15	154.99	114.168	240.25	208.76	114.169	214.25	217.84	203.49	114.17	212.8	201.14	114.167	244.28	248.65	237.8	114.17	201.68	208.45	114.168	197	202.95	114.17	179.72	114.169	180.62	191.19	194.77	114.168	197.21	216.75	226.56	114.169	181.64	171.36	193.2	114.168	207.34	172.81	114.167	200.99	265.52	114.169	225.48	114.17
114.869	140.36	173.86	114.87	179.84	200.95	154.06	114.868	255.07	208.55	114.868	214.62	217.35	203.48	114.869	211.2	202.81	114.863	242.51	248.42	241.06	114.868	201.79	208.13	114.868	194.82	203.29	114.868	180	114.869	177.81	191.37	194.9	114.864	197.69	216.37	226.31	114.867	180.47	170.11	192.93	114.864	207.36	173.43	114.867	201.12	265.46	114.87	225.99	114.87
115.569	139.99	173.42	115.57	178.64	200.76	154.34	115.569	255.08	210.78	115.569	214.09	216.74	203.46	115.568	209.17	202.84	115.567	242.08	248.13	240.18	115.568	202.06	209.05	115.569	194.69	203.63	115.569	180.08	115.569	177.95	191.25	195.44	115.568	197.95	217	226.07	115.568	177.11	172.08	192.71	115.568	208.54	173.43	115.567	202.73	264.9	115.568	226.73	115.57
116.268	137.57	173.58	116.268	176.81	201.46	154.75	116.267	249.76	206.46	116.268	214.02	216.64	203.09	116.268	208.01	203.89	116.268	242.53	246.1	234.94	116.268	201.91	209.15	116.27	196.21	203.6	116.268	180.33	116.267	180.36	191.28	195.38	116.269	198.3	216.69	225.7	116.268	177.48	173.08	192.62	116.269	208.67	173.73	116.268	203.27	260.38	116.27	226.59	116.27
116.968	136.38	173.48	116.968	175.36	200.76	153.85	116.967	251.63	206.96	116.968	214.54	216.74	203.04	116.969	206.58	204.82	116.968	242.26	245.73	236.15	116.967	201.68	208.76	116.969	197.6	203.74	116.97	180.33	116.968	181.55	191.11	195.52	116.97	198.4	216.86	226.03	116.968	179.2	172.38	192.18	116.969	208.1	173.74	116.968	205.3	256.42	116.969	227.04	116.97
117.669	137.63	173.3	117.668	175.84	197.94	153.82	117.668	257.36	207	117.668	214.07	217.21	202.26	117.669	206.1	204.46	117.67	242.72	245.76	236.39	117.667	201.98	208.84	117.67	198.7	204.05	117.669	180.32	117.667	181.74	191.02	193.82	117.669	198.64	216.89	225.4	117.668	179.66	172.47	192.11	117.667	212.3	173.97	117.668	205.32	253.9	117.669	226.5	117.67
118.367	138.71	173.06	118.369	175.82	193.7	154.65	118.368	256.67	207.43	118.372	213.98	217.45	202.57	118.367	205.97	204.86	118.367	242.67	246.73	236.25	118.368	201.53	204.91	118.368	199.18	204.56	118.369	180.26	118.368	181.44	190.15	193.55	118.365	198.45	213.88	225.34	118.368	180.29	172.51	193.31	118.368	216.18	174.17	118.368	206.07	254.89	118.369	226.53	118.369
119.068	138.94	172.93	119.068	175.68	196.12	154.75	119.069	253.03	207.21	119.069	213.85	217.84	202.39	119.067	205.45	204.95	119.067	242.6	246.1	237.28	119.067	201.91	197.32	119.069	199.41	205.26	119.069	180.24	119.068	181.42	190.37	192.81	119.068	198.46	212.91	225.52	119.067	180.25	172.37	192.78	119.068	214.36	174.33	119.068	206.3	258.2	119.07	223.31	119.068
119.769	139.17	173.21	119.769	175.17	196.94	155.09	119.768	251.33	209.05	119.768	213.57	217.45	202.27	119.769	205.14	205.55	119.768	242.5	245.99	241.44	119.768	202.06	198.04	119.769	198.85	204.64	119.769	180.35	119.768	181.38	190.89	191.8	119.768	198.66	213.05	225.06	119.767	180.52	172.52	192.61	119.768	209.79	174.3	119.767	206.41	260.86	119.768	214.13	119.768
120.469	138.94	172.9	120.469	174.83	199.03	155.1	120.467	249.48	210.42	120.468	213.82	217.44	202.44	120.468	204.72	205.83	120.47	242.55	245.83	235.92	120.469	202.18	199.01	120.47	197.93	205.26	120.469	179.97	120.468	181.8	191.34	191.89	120.469	198.64	213.65	225.12	120.468	181.24	172.9	192.3	120.468	208.24	174.11	120.467	206.74	262.09	120.468	213.14	120.469
121.169	139.09	172.91	121.167	174.86	201.2	154.99	121.166	245.29	211.22	121.169	212.91	217.27	202.18	121.168	204.19	205.76	121.168	242.8	246.97	237.23	121.169	201.94	198.97	121.168	198.13	205.34	121.169	179.96	121.168	181.99	191.47	191.68	121.169	198.99	214.95	225.25	121.168	181.65	173.25	192.98	121.168	206.49	174.13	121.168	207.17	262.54	121.169	217.92	121.169
121.869	139.97	172.84	121.869	174.53	201.4	154.87	121.868	247.71	210.97	121.869	213.12	216.94	202.35	121.863	203.86	205.81	121.869	242.7	245.56	236.46	121.869	201.47	199.08	121.869	198.42	204.91	121.869	180.18	121.868	182.55	191.64	192.83	121.864	198.89	215.71	224.86	121.868	181.95	173.1	196.55	121.863	208.24	174.22	121.868	207.04	262.75	121.869	222.27	121.869
122.569	140.05	172.72	122.567	175.02	201.78	155.06	122.568	246.75	208.79	122.569	213.09	216.83	202.29	122.567	203.95	206.58	122.568	241.32	245.81	235.36	122.567	201.18	200.33	122.569	196.35	205.6	122.568	177.31	122.568	182.11	190.22	193.43	122.569	198.99	215.92	225.01	122.567	181.88	170.24	197.29	122.569	208.62	174.21	122.568	206.82	262.97	122.569	224.24	122.568
123.268	140.68	172.54	123.267	174.58	201.95	154.22	123.268	244.44	207.99	123.269	213.05	217.41	202.44	123.267	204.08	206.63	123.269	241.56	245.75	234.16	123.268	201.35	200.65	123.268	195.59	205.22	123.268	174.75	123.267	182.11	189.85	193.89	123.269	199.04	215.85	224.56	123.269	181.65	169.86	195.64	123.268	207.63	174.4	123.268	207.11	263.72	123.269	225.05	123.268
123.968	140.7	172.67	123.967	175.45	202.4	154.59	123.966	243.04	207.76	123.969	212.64	217.09	202.4	123.968	203.88	206.53	123.97	241.46	244.33	235.49	123.968	201.4	201.46	123.97	198	205.14	123.969	175.35	123.969	182.53	189.86	194.51	123.969	199.09	216.33	225.18	123.968	181.57	170.2	195.56	123.968	208.7	174.55	123.968	206.47	264	123.968	225.4	123.969
124.669	140.76	172.64	124.667	174.86	202.65	154.71	124.668	242.61	207.09	124.669	212.79	216.89	202.22	124.668	203.48	206.25	124.669	241.91	255.56	234.57	124.67	201.6	202.64	124.668	198.75	205.97	124.667	176.03	124.669	183.1	190.11	194.06	124.669	199.24	217.02	224.98	124.667	181.55	172.45	194.63	124.669	208.65	174.67	124.668	207.33	263.88	124.667	225.97	124.668
125.368	140.84	172.77	125.368	174.47	202.22	154.98	125.368	243.16	207.4	125.365	213.16	216.62	202.14	125.368	203.87	206.47	125.363	241.53	260.87	233.86	125.37	202.49	203.37	125.37	198.92	205.82	125.368	177.52	125.369	182.92	190.16	194.41	125.365	198.96	216.81	224.7	125.368	181.61	172.98	193.47	125.365	207.73	174.48	125.369	207.62	264	125.369	226.06	125.37
126.068	140.51	172.54	126.068	174.65	201.85	154.46	126.068	242.98	206.18	126.069	212.57	214.12	203.53	126.067	203.41	206.25	126.067	241.14	259.36	233.35	126.068	202.18	204.26	126.069	199.22	206.18	126.068	178.47	126.069	182.44	191.36	194.55	126.069	199.15	216.67	224.96	126.068	181.75	172.01	194.1	126.067	211.23	174.95	126.069	207.34	264.05	126.068	226.57	126.069
126.767	140.77	172.63	126.768	174.07	202.18	155.06	126.768	243.37	207.12	126.768	212.11	210.44	213.27	126.77	203.71	206.47	126.769	240.75	257.42	234.29	126.77	202.02	203.92	126.77	199.33	206.43	126.768	179.74	126.769	181.27	190.84	194.43	126.769	198.98	216.88	224.6	126.768	181.75	171.69	193.72	126.769	216.66	174.96	126.769	207.44	262.65	126.769	226.39	126.769
127.469	138.27	170.02	127.47	177.07	201.95	152.02	127.466	242.63	206.15	127.468	211.89	210.21	212	127.469	203.82	206.55	127.469	240.28	251.75	233.87	127.47	201.59	204.25	127.469	199.65	206.32	127.468	180.36	127.467	180.15	191.69	194.44	127.469	198.98	216.6	224.27	127.468	181.65	172.41	193.31	127.469	217.25	174.53	127.47	207.53	256.35	127.468	225.03	127.469
128.168	138.56	169.72	128.168	179.07	201.28	150.99	128.168	243.05	205.89	128.168	211.91	214.77	205.27	128.17	203.77	206.92	128.168	247.07	251.33	232.56	128.17	201.85	204.5	128.168	198.68	205.84	128.169	180.46	128.167	178.92	191.71	194.83	128.169	198.83	216.81	224.14	128.167	181.84	172.29	192.61	128.169	213.11	174.72	128.168	207.53	254.18	128.168	213.69	128.17
128.869	138.53	170.14	128.867	180.39	201.7	152.94	128.868	251.46	205.83	128.868	212.26	216.76	200.6	128.868	204.03	206.58	128.867	248.84	250.44	232.91	128.87	202.23	204.71	128.869	198.47	205.54	128.869	180.12	128.868	177.74	190.91	194.75	128.869	199.12	216.94	224.44	128.869	181.96	172.38	192.91	128.866	209.33	174.78	128.869	207.25	256.15	128.868	211.13	128.869
129.568	136.58	170.05	129.568	180.37	201.81	154.7	129.569	251.86	205.48	129.568	211.85	217.19	199.79	129.568	203.91	206.69	129.569	251.41	249.32	233.31	129.569	202.07	205.25	129.568	198.09	206.74	129.568	178.89	129.569	179.3	190.55	194.68	129.569	199.21	217.5	224.78	129.569	182.15	173.12	192.95	129.565	207.64	174.74	129.569	207.56	257.42	129.57	216.13	129.568
130.267	134.23	169.83	130.269	180.62	201.44	155.05	130.268	246.57	205.84	130.269	211.96	217.28	200.98	130.268	204.06	206.64	130.268	253.24	254.84	234.52	130.268	202.36	205.56	130.268	198.25	210.02	130.268	176.59	130.267	180.7	190.8	193.36	130.269	199.19	217.11	224.24	130.268	182.29	173.26	193.34	130.268	207.45	174.88	130.27	207.46	260.18	130.268	221.83	130.269
130.967	133.17	170.22	130.968	178.72	201.26	154.92	130.965	243.1	206.29	130.968	211.33	217.25	202.2	130.968	204.53	206.76	130.968	251.85	254.97	248.29	130.969	202.03	205.9	130.964	197.53	212.85	130.968	176.61	130.969	181.89	190.6	192.97	130.969	199.2	216.39	223.72	130.969	182.18	173.7	192.78	130.97	208.54	174.71	130.97	207.65	261.8	130.968	223.17	130.969
131.669	134.05	169.67	131.668	176.35	201.58	155.46	131.667	242.43	205.42	131.667	211.42	216.96	202.39	131.667	216.12	206.69	131.668	248.83	252.44	253.09	131.669	202.2	205.75	131.668	197.08	208.44	131.67	176.8	131.668	182.37	191.45	192.72	131.67	199.16	216.81	224	131.669	182.3	170.92	193.31	131.67	208.33	174.68	131.669	207.58	262.42	131.669	223.97	131.669
132.367	135.28	169.96	132.37	175.84	201.11	155.23	132.368	242.63	211.16	132.368	211.37	216.54	202.56	132.367	214.16	206.72	132.367	245.83	250.79	253.51	132.369	200.08	206.26	132.368	195.64	205.4	132.368	177.22	132.368	181.79	191.36	191.3	132.366	199.19	217.34	224.52	132.367	182.44	170.74	193	132.366	209.1	174.93	132.37	207.28	262.86	132.369	225.13	132.369
133.068	135.94	169.89	133.068	175.84	201.17	155.54	133.068	242.38	216.88	133.068	211.66	216.73	202.53	133.069	210.73	207.43	133.067	244.71	250.14	239.75	133.069	199.04	206.59	133.067	195.52	202.35	133.07	178.51	133.067	181.55	191.67	191.95	133.068	199.2	217.01	224.19	133.067	182.16	171.32	192.88	133.07	208.9	174.84	133.068	207.77	263.01	133.068	225.27	133.068
133.767	136.1	169.96	133.768	176.3	201.24	155.29	133.769	252.43	216.41	133.768	211.77	216.55	202.94	133.768	208.72	207.35	133.768	243.77	250.34	235.13	133.77	200.03	206.12	133.768	196.54	202.18	133.767	179.26	133.768	182.05	191.73	192.82	133.769	199.22	217.04	224.35	133.767	181.71	173.32	192.7	133.768	209.11	174.79	133.77	207.21	263.52	133.767	225.49	133.768
134.468	136.6	169.64	134.469	176.04	198.63	155.15	134.47	260.08	213.96	134.469	211.73	216.94	202.67	134.468	206.6	207.03	134.47	243.48	250.38	235.09	134.47	201	206.71	134.468	197.72	202.62	134.467	180.46	134.469	181.85	191.74	193.28	134.469	199.21	216.89	225.26	134.468	181.19	172.74	192.64	134.468	207.88	174.92	134.47	206.5	263.87	134.468	225.61	134.469
135.169	137.16	169.72	135.169	175.92	194.33	154.85	135.169	254.91	214.19	135.167	211.05	217.12	202.78	135.169	205.91	207.25	135.168	243.41	251.44	235.87	135.169	200.87	206.31	135.168	198.08	202.07	135.169	180.53	135.167	181.83	191.78	193.76	135.169	199.57	217.71	225.07	135.166	176.12	172.17	192.29	135.169	207.93	174.99	135.169	204.36	263.81	135.168	225.3	135.169
135.869	137.76	170	135.868	175.84	195.63	155.49	135.869	255.3	213.6	135.868	211.52	216.92	202.79	135.864	205.4	206.9	135.868	243.43	250.42	234.87	135.87	201.84	206.11	135.868	198.75	202.25	135.868	180.16	135.867	182.2	191.87	194.32	135.869	199.27	217.4	226.54	135.867	174.67	172	192.93	135.869	207.18	175.2	135.869	200.77	264.26	135.868	225.48	135.871
136.569	137.76	169.64	136.568	175.78	198.2	155.35	136.57	251.02	211.05	136.568	210.8	217.03	202.45	136.568	205.34	206.97	136.568	242.59	248.82	233.23	136.569	202.15	206.27	136.569	198.93	201.64	136.57	180.11	136.567	182.36	191.77	194.7	136.569	199.17	215.97	227.37	136.566	178.03	171.97	192.74	136.569	208.14	175.15	136.567	198.3	264.33	136.569	223.81	136.569
137.268	138.27	169.41	137.268	174.95	200.58	155.02	137.269	249.52	208.83	137.268	211.34	216.87	202.79	137.268	205.24	207.38	137.27	241.81	250.56	232.36	137.267	201.9	205.89	137.269	198.93	204.15	137.269	179.24	137.267	182.59	191.79	194.34	137.269	199.31	215.83	226.88	137.266	179.5	172.65	193.47	137.269	215.34	174.87	137.27	198.56	264.53	137.269	213.21	137.271
137.97	138.2	169.53	137.968	179.16	202.1	155.32	137.965	254.98	209.02	137.967	211.47	215.5	203.37	137.969	204.71	206.89	137.969	243.09	250.58	232.19	137.967	201.85	206.55	137.968	198.6	207.05	137.969	176.7	137.967	182.64	191.79	193.15	137.969	199.66	215.78	226.51	137.966	180.02	173.14	192.48	137.969	216.77	175.16	137.968	200.16	264.45	137.968	212.12	137.968
138.669	138.45	169.41	138.668	180.82	201.88	154.81	138.669	249.46	207.25	138.669	210.92	212.95	211.59	138.669	204.55	207.04	138.669	243.17	251.22	233.26	138.668	201.87	206.42	138.668	199.01	205.29	138.67	175.24	138.667	182.46	191.75	192.67	138.67	197.54	215.91	226.54	138.668	180.25	171.53	192.82	138.669	212.27	175.34	138.668	201.46	264.69	138.669	216.84	138.67
139.365	138.44	169.6	139.367	180.81	203.13	154.89	139.369	248.1	208.61	139.369	211.24	210.41	210.89	139.369	204.41	206.61	139.364	242.4	249.73	233.08	139.369	201.92	206.2	139.368	196.72	204.02	139.37	177.43	139.367	182.7	191.8	191.38	139.364	196.28	216.71	226.19	139.368	180.1	171.25	192.55	139.368	209.28	175.17	139.37	203.08	264.29	139.368	222.28	139.369
140.07	138.82	169.4	140.067	180.4	202.57	154.74	140.07	245.22	207.76	140.069	212.15	214.23	205.35	140.069	204.42	207.14	140.068	242.01	249.74	233.1	140.069	201.84	206.77	140.068	196.37	202.57	140.07	177.86	140.068	182.35	190.81	191.89	140.069	195.09	216	226.1	140.067	180.52	172.31	194.2	140.068	207.16	175.12	140.068	203.71	264.26	140.068	223.38	140.069
140.768	138.2	171.14	140.77	178.56	202.81	154.68	140.768	245.79	207.48	140.769	211.11	216.88	200.55	140.769	204.23	206.59	140.768	241.82	249.29	233.4	140.768	201.63	206.43	140.768	197.04	203.37	140.769	179.03	140.768	182.7	189.19	192.95	140.767	195.46	216.4	226.17	140.767	180.56	174.34	198.02	140.769	207.6	175.1	140.768	205.27	264.34	140.768	224.38	140.768
141.469	135.73	177.35	141.47	176.91	202.08	154.61	141.47	244.09	206.8	141.468	211.75	216.62	199.79	141.468	205.14	206.8	141.471	244.68	249.44	232.84	141.468	201.85	206.71	141.468	196.84	203.09	141.469	179.93	141.468	182.95	188.73	193.27	141.467	195.68	216.34	225.95	141.466	181.41	174.1	198.3	141.469	207.43	175.32	141.468	205.77	264.33	141.468	224.72	141.468
142.169	134.25	177.12	142.169	177.2	202.52	154.85	142.169	243.37	206.61	142.169	211.18	217.81	201.34	142.17	205.21	206.68	142.169	248.88	248.54	232.03	142.168	201.57	206.71	142.168	198.85	202.9	142.169	180.7	142.167	179.64	189.06	194.18	142.864	198.3	217.26	225.34	142.168	181.45	173.41	197.15	142.167	207.78	175.26	142.169	205.38	264.32	142.168	224.97	142.168
142.869	133.2	178.24	142.869	176.55	201.99	154.5	142.869	243.41	206.6	142.869	211.7	217.38	202.36	142.868	204.46	206.79	142.864	250.24	248.13	234.38	142.869	202.78	206.84	142.87	198.7	203.01	142.869	180.09	142.867	178.55	190.31	193.95	143.569	198.3	217.26	225.34	142.868	181.49	172.6	195.8	142.863	208.32	175.44	142.869	205.53	264.71	142.87	225.28	142.868
143.569	134.32	177.51	143.567	176.39	202.41	155.56	143.567	243.24	205.86	143.569	211.51	217.41	202.55	143.569	204.61	206.83	143.568	251.12	246.59	233.06	143.567	202.53	207.22	143.568	199.24	203.19	143.567	180.09	143.567	178.21	190.87	194.4	144.267	198.3	217.26	225.34	143.568	181.85	172.83	195.23	143.567	208.16	175.21	143.568	206.32	264.42	143.57	225.07	143.569
144.269	135.4	177.67	144.269	176.57	201.33	155.03	144.269	242.76	206.01	144.269	211.55	217.45	202.61	144.268	204.86	206.81	144.269	246.4	246.18	235.38	144.269	202.03	207.66	144.269	198.86	202.79	144.267	179.21	144.267	180.3	190.97	194.29	144.97	198.3	217.26	225.34	144.266	181.8	172.88	194	144.268	207.93	175.36	144.268	206.81	264.7	144.269	225.25	144.269
144.969	135.95	175.35	144.967	175.91	201.75	154.34	144.969	242.79	206.14	144.969	211.08	217.2	202.66	144.968	207.81	206.64	144.969	244.91	246.29	248.14	144.967	202.21	207.27	144.969	198.35	202.43	144.969	177.19	144.968	180.92	191.38	194.54	145.668	198.3	217.26	225.34	144.968	181.7	172.66	194.88	144.967	207.97	175.05	144.968	206.82	265.2	144.966	218.34	144.968
145.67	136.27	172.59	145.668	176.02	201.78	153.44	145.668	241.79	205.42	145.669	211.58	216.99	202.96	145.67	208.23	206.81	145.669	244.53	246.42	250.8	145.668	202.09	207.45	145.669	198.52	202.07	145.668	176.39	145.668	182.41	191.78	194.43	146.364	198.44	217.73	225.33	145.667	181.91	172.81	194.16	145.669	207.55	175.3	145.668	207.12	264.98	145.669	211.34	145.668
146.371	136.84	171.78	146.368	175.57	201.11	154.33	146.368	243.68	206.98	146.37	211.48	217.23	202.84	146.369	205.87	206.63	146.363	243.4	246.62	250.5	146.369	201.81	207.81	146.369	198.7	202.67	146.368	176.66	146.37	181.92	192.07	194.48	147.068	198.57	217.93	225.13	146.368	181.8	172.94	193.36	146.364	207.58	175.16	146.368	206.9	265.6	146.368	212.98	146.369
147.07	137.09	171.23	147.07	175.3	201.18	154.72	147.069	245.37	217.35	147.068	211.44	217.07	202.41	147.069	207.07	206.48	147.067	242.56	245.92	241.32	147.07	201.97	207.81	147.069	196.99	202.07	147.068	177.32	147.068	181.67	191.81	194.76	147.77	198.68	217.54	225.43	147.067	181.62	171.34	193.84	147.068	210.21	175.62	147.069	206.36	266.01	147.067	218.84	147.068
147.768	137.38	171.09	147.768	175.57	201.2	155.12	147.768	243.84	221.17	147.767	211.29	217.06	202.92	147.768	216.46	206.75	147.767	243.1	246.15	234.23	147.77	202.23	208.33	147.769	195.06	202.71	147.767	178.81	147.768	181.77	191.87	194.58	148.47	198.86	218.21	225.25	147.768	178.39	172.71	194.08	147.768	216.78	175.29	147.768	206.05	259.3	147.77	222.23	147.769
148.468	137.47	171.31	148.468	175.2	201.16	155.69	148.469	243.15	216.4	148.469	210.81	216.86	202.42	148.469	213.44	206.79	148.467	243.7	246.4	232.92	148.47	201.84	208.01	148.471	197.39	203.51	148.467	179.01	148.469	181.61	191.69	194.92	149.17	198.93	217.88	225.24	148.468	175.95	174.93	197.66	148.468	214.35	175.41	148.469	205.8	253.02	148.469	223.25	148.47
149.169	137.84	171.24	149.169	176.66	201.03	154.92	149.169	243.29	213.83	149.167	207.34	216.87	202.3	149.17	211.07	206.32	149.169	243.21	245.89	233.6	149.17	201.96	208.1	149.171	198.83	210.24	149.167	179.57	149.168	181.5	192.08	194.1	149.864	199.06	217.8	225.21	149.168	177.87	173.81	198.02	149.168	210.36	175.19	149.169	205.4	251.36	149.17	223.79	149.17
149.866	137.19	171.4	149.87	179.73	200.61	156.19	149.869	247.6	208.88	149.867	208.09	216.9	202.09	149.869	209.35	206.38	149.864	242.59	244.81	232.15	149.87	202.28	208.31	149.868	198.86	206.89	149.869	179.77	149.867	181.71	191.92	193.85	150.569	199.27	215.14	225.36	149.868	179.53	173.14	197.37	149.865	208.08	174.89	149.868	205.64	253.11	149.869	223.6	149.87
150.569	136.45	171.29	150.57	180.68	196.63	155.96	150.569	253.02	206.71	150.568	206.9	216.51	201.93	150.569	207.58	206.39	150.567	242.98	248.74	231.55	150.568	202.32	208.45	150.568	199.47	203.24	150.568	179.73	150.568	181.78	192.22	193.88	151.269	199.39	211.26	224.99	150.567	180.08	173.11	196.43	150.569	207.81	174.99	150.568	205.64	253.93	150.569	224.26	150.569
151.267	137.58	171.17	151.269	181.51	197.87	155.81	151.269	246.55	206.21	151.268	207.73	216.61	201.65	151.269	207.04	206.42	151.268	242.55	258.2	232.15	151.269	202.3	208.59	151.268	199.33	203.62	151.267	180.03	151.268	181.96	191.81	193.98	151.969	199.14	210.79	224.76	151.268	180.43	173.2	195.89	151.267	207.71	175.15	151.27	205.73	257.34	151.269	224.31	151.27
151.968	137.95	170.8	151.97	182.46	198.63	155.69	151.969	244.56	205.74	151.968	212.48	216.29	201.61	151.969	206.04	206.17	151.968	241.93	258.86	233.83	151.969	202.23	208.22	151.969	198.5	202.63	151.968	179.65	151.97	182.23	191.3	192.85	152.669	199.45	210.58	225.01	151.969	180.41	173.21	195.44	151.969	208.28	174.69	151.97	205.92	260	151.969	224.64	151.969
152.669	137.54	170.89	152.669	179.97	197.8	155.87	152.668	245.34	205.65	152.667	215.27	216.33	201.01	152.669	205.46	206.69	152.668	242.51	255.62	234.73	152.67	202.41	208.51	152.67	198.02	203.01	152.669	179.6	152.668	182.29	190.95	193.42	153.365	199.63	211.92	224.92	152.668	180.72	173.33	194.34	152.669	207.71	174.75	152.669	206.22	260.56	152.669	224.89	152.671
153.371	137.67	170.43	153.369	179.16	199.28	156.02	153.369	254.17	205.48	153.365	215.19	215.75	201.1	153.364	205.12	206.37	153.368	242.52	251.92	234.08	153.37	202.06	208.38	153.37	198.88	203.27	153.369	179.65	153.368	182.06	189.94	193.51	154.068	199.76	213.41	225.05	153.368	181.34	171.94	194.16	153.369	207.06	175.12	153.369	206.35	261.41	153.369	224.79	153.369
154.068	138.01	172.17	154.069	177.48	200.84	155.73	154.069	252.58	205.94	154.068	216.09	216.04	201.53	154.07	204.71	206.13	154.068	244.05	251.25	234.28	154.07	202.5	208.44	154.07	196.63	203.17	154.067	179.59	154.069	180.76	189.81	192.26	154.77	199.31	214.09	225.18	154.066	181.43	170.22	193.81	154.067	206.93	174.79	154.068	206.08	261.62	154.07	224.65	154.069
154.768	138.31	179.49	154.769	177.58	201.6	155.89	154.769	251.14	206.09	154.769	216.62	216.56	201.26	154.769	204.66	206.13	154.769	248.05	250.87	234.35	154.769	202.1	208.02	154.769	196	203.7	154.768	179.37	154.769	178.99	190.1	192.2	155.469	199.39	215.09	224.95	154.766	178.26	168.33	190.82	154.769	207.07	174.5	154.768	206.29	261.94	154.768	224.67	154.771
155.47	137.82	179.7	155.469	177.59	202.47	155.57	155.469	246	205.71	155.468	216.86	216.65	201.2	155.469	204.48	205.96	155.468	250.92	250.33	235.08	155.469	202.48	208.22	155.47	197.45	203.34	155.47	179.41	155.469	178.34	190.41	193.12	156.17	199.25	215.51	224.65	155.466	178.29	170.34	190.43	155.468	206.42	174.97	155.47	206.25	262.03	155.469	225.1	155.47
156.169	137	180.78	156.169	177.53	202.16	153.86	156.17	244.46	205.78	156.17	216.8	216.03	202.16	156.167	204.33	206.55	156.169	252.91	249.36	233.92	156.17	195.6	208.6	156.169	198.55	203.04	156.17	179.56	156.169	179.5	190.63	193.44	156.866	199.45	216.05	224.47	156.166	178.16	170.3	190.85	156.167	206.51	174.81	156.169	206.28	262.09	156.169	224.21	156.17
156.869	136.55	180.71	156.864	177.47	201.68	151.88	156.864	242.72	205.12	156.866	216.89	216.12	209.71	156.867	210.24	206.46	156.867	250.57	249.31	233.39	156.868	195.68	208.13	156.869	199.74	202.33	156.868	179.37	156.868	180.67	191.11	193.78	157.568	199.51	216.64	224.83	156.868	183.66	171.75	194.29	156.864	205.86	175.02	156.869	206.03	262.36	156.869	212.55	156.871
157.57	137.43	175.6	157.569	176.94	202	154.5	157.569	242.72	208.45	157.568	216.5	215.8	212.85	157.567	215.96	206.3	157.567	246.75	249.2	239.77	157.569	193.18	208.22	157.569	198.96	202.61	157.568	178.21	157.568	181.46	190.9	194.1	158.27	199.72	216.21	224.74	157.567	181.65	172.29	193.96	157.567	206.99	172.77	157.567	206.06	262.45	157.569	210.95	157.569
158.27	137.82	179.85	158.268	176.89	202.79	155.15	158.27	243.18	219.49	158.269	216.12	215.94	210.26	158.269	213.51	206.74	158.267	244.32	249.11	248.76	158.27	196.07	208	158.269	198.56	202.61	158.268	175.69	158.268	182.03	190.88	193.85	158.97	199.63	216.45	224.55	158.267	181.64	172.38	193.67	158.267	206.26	168.41	158.268	205.86	262.17	158.269	214.62	158.269
158.968	137.74	182.11	158.97	176.71	201.75	155.27	158.97	242.94	218.76	158.97	216.13	215.96	203.11	158.968	210.91	206.22	158.967	244.56	248.6	250.42	158.969	198.26	207.44	158.969	198.35	202.42	158.968	175.11	158.97	182.47	191.03	193.77	159.67	199.64	216.75	224.64	158.966	181.55	172.56	194.03	158.967	206.22	167.21	158.968	205.88	262.44	158.969	220.61	158.969
159.668	138.36	181.3	159.67	176.5	201.89	155.68	159.668	242.28	218.27	159.668	215.94	216.02	200.41	159.669	209.76	205.72	159.669	243.9	250.59	246.85	159.669	199.05	207.69	159.669	197.95	202.95	159.667	176.12	159.669	181.96	191.09	193.3	160.364	199.6	216.76	224.77	159.669	181.72	171.85	193.5	159.667	206.21	167.8	159.667	205.56	262.58	159.669	222.74	159.67
160.368	137.7	177.13	160.37	176.33	202.22	155.57	160.368	248.85	214.85	160.37	215.71	215.85	199.49	160.367	207.56	205.79	160.367	243.29	253.67	247.75	160.37	201.01	207.55	160.37	198.2	202.2	160.369	176.9	160.368	181.72	191.22	191.49	161.069	199.82	216.94	225.04	160.369	178.4	169.43	190.34	160.364	206	168.68	160.367	201.85	262.55	160.369	223.19	160.37
161.069	137.39	174.97	161.07	176.29	201.55	155.6	161.068	248.86	210.5	161.068	215.52	215.76	201.19	161.067	206.46	205.78	161.069	242.71	252.39	246.44	161.068	201.07	208.37	161.068	197.85	202.58	161.069	178.28	161.069	181.82	191.89	191.68	161.769	199.56	217.28	224.81	161.067	178.43	167.6	190.24	161.068	206.59	170.67	161.067	198.97	262.91	161.07	223.66	161.069
161.767	138.5	173.49	161.771	176.44	201.51	154.92	161.767	244.5	207.69	161.768	214.69	216.04	201.77	161.769	205.5	206.38	161.767	243.24	249.83	235.31	161.769	201.1	208.21	161.768	198.2	202.05	161.768	179.32	161.769	181.89	191.57	192.73	162.469	199.43	217.64	224.77	161.768	178.47	166.68	189.94	161.767	206.43	171.77	161.767	197.92	263.4	161.77	224.01	161.77
162.468	138.48	172.52	162.468	179.71	200.96	155.29	162.467	242.77	207.06	162.469	214.49	215.69	201.76	162.468	205.29	206.18	162.469	242.72	249.74	232.98	162.469	201.11	208.61	162.469	195.88	203.13	162.468	179.88	162.469	182.25	191.99	193.72	163.168	199.65	218.04	224.5	162.467	178.57	170.13	190.55	162.468	205.45	172.09	162.467	199.74	263.31	162.47	224.3	162.469
163.169	138.24	172.12	163.171	180.4	202.01	155.74	163.168	243.31	207.85	163.169	214.42	214.76	202.26	163.169	205.18	206.12	163.169	242.32	249.48	234.31	163.17	201.05	208.45	163.17	196.1	203	163.17	180.2	163.169	182.15	191.75	193.9	163.868	199.62	217.56	224.56	163.167	178.56	170.46	190.47	163.168	206.64	172.36	163.168	202.71	263.37	163.17	224.05	163.169
163.865	137.83	172.27	163.869	181.5	201.52	155.17	163.868	243.39	207.07	163.87	213.9	215.23	202.41	163.868	204.57	206.04	163.87	241.98	249.58	234.38	163.87	201.24	208.48	163.87	197.72	205.49	163.87	180.17	163.869	182.17	191.41	194.26	164.568	197.73	217.87	224.72	163.868	178.39	169.7	190.25	163.862	206.45	172.94	163.869	203.56	263.63	163.87	224.11	163.869
164.569	138.54	172.08	164.569	180.89	201.73	155.67	164.567	242.12	206.85	164.569	213.25	215.49	202.57	164.569	204.4	205.96	164.568	242.94	249.14	235.32	164.569	201.58	208.38	164.568	198.84	211.92	164.569	180.12	164.568	181.8	191.04	194.29	165.269	195.43	217.87	224.35	164.568	178.44	169.43	190.27	164.568	206.6	172.71	164.568	204.18	263.5	164.569	223.77	164.569
165.269	138.96	171.68	165.267	179.93	200.87	155.3	165.269	242.4	206.23	165.269	213.64	215.76	202.38	165.267	204.26	205.62	165.27	242.09	249.72	232.39	165.268	200.88	208.79	165.269	199.11	209.14	165.268	180.15	165.268	179.64	190.5	193.87	165.968	193.89	217.93	224.57	165.268	178.75	169.45	189.96	165.268	205.72	173.15	165.268	205.01	263.97	165.269	223.65	165.269
165.969	139.07	171.26	165.968	179.53	201.01	155.14	165.969	257.36	206.59	165.97	213.47	215.49	202.47	165.969	204.09	205.91	165.969	242.51	256.24	231.47	165.968	201.09	209.02	165.97	199.81	204.25	165.968	180.02	165.969	178.99	190.51	193.03	166.668	195.19	217.8	224.1	165.968	178.86	169.35	189.92	165.967	205.86	173.3	165.968	204.83	263.56	165.968	217.06	165.969
166.67	139.48	171.15	166.668	178.25	201.48	154.92	166.668	258.18	206.93	166.669	213.9	215.82	202.68	166.669	203.81	205.52	166.668	242.57	252.89	233.22	166.67	200.94	208.57	166.671	199.5	202.77	166.669	179.71	166.669	178.7	190.57	192.22	167.364	195.32	217.6	224.85	166.668	178.91	169.76	190.08	166.667	205.59	173.46	166.668	204.81	264.35	166.668	210.41	166.669
167.37	139.61	171	167.369	177.68	201.08	155.3	167.368	251.85	205.86	167.364	212.77	215.52	202.33	167.369	203.9	206.16	167.368	241.67	251.37	234.88	167.371	200.85	208.63	167.369	199	203.01	167.369	179.7	167.368	180.46	191.37	192.19	168.068	196.1	217.22	224	167.369	178.18	169.94	189.97	167.364	206.28	173.52	167.369	205.24	264.1	167.369	212.13	167.37
168.069	139.57	170.49	168.07	177.84	201.48	155.07	168.068	247.58	206.46	168.068	212.68	215.58	202.34	168.069	203.96	205.96	168.068	241.19	251.16	234.7	168.068	200.85	208.84	168.069	198.27	202.73	168.069	179.56	168.068	181.11	191.25	192.81	168.768	196.39	216.4	224.27	168.068	172.49	167.53	189.63	168.068	208.55	173.74	168.067	205.55	264.18	168.07	218.33	168.07
168.769	139.96	170.39	168.768	178.1	200.85	155.15	168.769	243.62	209.33	168.769	212.92	215.84	202.58	168.768	204.19	206.04	168.768	240.83	250.62	234.71	168.768	201.22	208.83	168.769	198.78	201.68	168.769	179.67	168.768	181.91	190.87	193.73	169.468	197.03	214.66	224.56	168.769	170.38	168.16	189.69	168.769	214.08	173.71	168.768	206.06	259.95	168.769	221.67	168.768
169.469	139.93	170.35	169.47	177.62	199.19	155.42	169.468	244.48	215.82	169.469	213.08	215.47	202.56	169.468	204.16	205.88	169.467	240.47	250.33	233.21	169.468	200.55	208.46	169.469	198.63	203.24	169.469	179.16	169.47	182.26	190.49	194.19	170.169	197.63	214.91	223.93	169.468	173.02	170.95	189.64	169.468	216.7	173.88	169.468	206.18	253.98	169.468	222.65	169.469
170.17	139.88	170.46	170.168	177.15	195.47	155.07	170.168	243.71	214.24	170.168	212.96	215.51	202.02	170.169	204.01	206.01	170.168	240.98	248.93	233.53	170.168	200.29	208.08	170.169	196.07	203.11	170.168	179.75	170.169	182.23	190.79	194.61	170.865	197.56	215.82	224.33	170.169	175.65	170.7	189.56	170.168	214.72	174.3	170.169	206.05	251.77	170.167	223.18	170.169
170.87	139.53	170.58	170.868	176.93	195.41	155.03	170.868	244.72	206.37	170.868	212.74	215.23	201.7	170.863	204.45	206.2	170.863	240.12	248.85	234.86	170.868	200.99	208.6	170.87	197.18	202.69	170.869	177.91	170.869	182.14	190.37	194.44	171.568	197.82	215.96	224.08	170.869	176.31	169.92	188.79	170.865	211.23	174.19	170.869	206.29	253.57	170.868	223.24	170.869
171.569	139.88	170.6	171.568	176.24	198.61	155.22	171.568	243.48	205.26	171.569	212.55	215.35	201.93	171.568	204.47	205.72	171.567	244.42	248.78	233.95	171.568	201.46	207.92	171.57	198.23	205.76	171.568	175.64	171.568	182.13	190.5	194.61	172.267	198	215.87	226.84	171.568	176.7	169.85	188.9	171.568	207.78	174.16	171.569	205.8	255.17	171.569	223.88	171.569
172.269	139.08	170.77	172.268	175.98	199.27	155.19	172.268	241.78	205.84	172.269	212.74	215.16	201.69	172.268	213.07	205.2	172.267	248.27	247.96	233.07	172.269	201.36	198.02	172.269	198.62	203.53	172.269	174.02	172.269	181.56	190.7	193.19	172.969	198.4	216.52	227.76	172.268	177.14	169.78	189.04	172.269	207.72	174.3	172.269	205.68	258.37	172.269	223.97	172.27
172.968	138.88	170.3	172.968	175.55	201.43	154.96	172.968	242.07	205.73	172.969	212.42	215.05	201.38	172.97	216.74	205.57	172.969	250.29	248.59	233.01	172.969	201.18	193.98	172.969	199.48	201.66	172.97	176.3	172.969	181.68	191.5	192.97	173.669	198.39	216.37	227.62	172.969	176.84	170.09	189.24	172.97	208.13	174.69	172.967	205.96	258.62	172.967	223.91	172.97
173.669	139.02	175.98	173.669	174.98	201.09	155.31	173.669	242.3	205.43	173.668	212.71	215.04	201.48	173.668	213.32	206.14	173.669	245.68	247.64	233.13	173.668	200.89	196.93	173.669	200.06	202.97	173.67	176.85	173.667	181.34	190.96	193.08	174.363	198.51	216.97	226.91	173.668	177.59	170.09	189.03	173.669	208.84	174.61	173.669	205.87	260.79	173.669	223.69	173.671
174.367	137.72	177.73	174.368	174.7	201.71	155.28	174.367	240.96	205.8	174.366	212.68	215.04	201.66	174.368	211.06	206.1	174.364	249	247.95	233.38	174.37	200.77	199.59	174.369	199.43	203.33	174.37	178.05	174.369	181.67	191.07	192.88	175.068	198.31	216.71	225.68	174.369	177.95	170.05	189.51	174.365	208.49	174.69	174.369	206.31	260.87	174.369	223.66	174.369
175.067	136.45	177.98	175.069	174.67	202.34	155.35	175.068	241.29	204.61	175.07	212.65	215.18	201.34	175.068	210.35	205.75	175.067	249.48	247.92	243.37	175.07	200.88	199.63	175.068	198.88	202.65	175.07	178.62	175.068	182	191.13	193.43	175.768	198.36	216.92	224.96	175.067	177.92	169.91	188.59	175.069	208.09	174.58	175.068	206.04	261.63	175.068	215.51	175.069
175.768	136.46	177.75	175.769	176.34	201.74	155.11	175.767	242	211	175.769	212.28	215.28	201.14	175.769	207.85	205.61	175.768	244.74	246.26	251.9	175.769	201.09	201.01	175.769	199.03	202.6	175.769	179.49	175.768	179.61	191.19	193.63	176.47	198.55	217.51	224.8	175.767	178.33	167.43	189.3	175.769	208.23	174.41	175.767	206.25	261.68	175.768	211.11	175.769
176.468	137.79	179	176.47	179.69	198.95	154.57	176.467	242.4	215.86	176.47	212.21	214.87	200.86	176.468	206.81	205.87	176.469	243.43	246.5	250.93	176.471	201.17	202.19	176.468	198.6	203.74	176.469	180.06	176.467	178.13	191.3	193.53	177.171	198.78	217.24	224.63	176.467	178.24	167.86	189.05	176.468	208.06	174.64	176.469	206.03	262.3	176.469	213.52	176.47
177.168	137.27	177.24	177.169	181.22	200.33	155.1	177.168	242.45	211.04	177.168	211.84	214.64	201.38	177.17	205.83	205.91	177.168	242.32	246.78	244.63	177.17	200.97	203.63	177.169	198.99	203.21	177.17	179.98	177.169	177.9	191.31	194.33	177.864	198.85	217.29	224.68	177.167	178.26	169.71	188.9	177.168	207.7	174.74	177.167	206	262.06	177.163	219.18	177.17
177.868	138.04	175.07	177.87	182.2	202.37	155.35	177.867	241.97	205.58	177.869	212.31	214.69	200.97	177.87	204.97	205.63	177.868	242.41	246.24	233.19	177.87	201.39	204.45	177.868	196.74	202.76	177.87	179.91	177.868	178.76	191.31	193.82	178.57	198.65	217.12	225	177.869	178.29	169.73	189.24	177.869	208.11	174.84	177.869	206.21	262.16	177.869	222.13	177.871
178.567	138.21	174.28	178.568	182.71	202.17	154.93	178.567	242.39	205.35	178.568	211.8	214.39	200.78	178.568	204.91	205.48	178.568	242.42	246.73	233.96	178.569	201.26	204.1	178.568	197	202.08	178.57	180.16	178.568	180.63	191.03	192.42	179.27	198.71	217.58	225.51	178.567	177.99	169.58	188.92	178.567	208.13	174.75	178.567	206.05	262.23	178.569	222.44	178.57
179.269	138.57	174.17	179.269	179.62	201.4	154.69	179.269	242.68	204.74	179.269	211.35	214.74	200.92	179.267	204.51	205.74	179.269	242.79	246.38	236.79	179.269	201.42	205.09	179.268	198.28	202.76	179.268	179.61	179.268	181.86	191.42	192.18	179.97	198.7	217.41	225.17	179.267	178.3	169.26	188.35	179.267	207.59	174.91	179.268	205.54	262.12	179.27	223.22	179.27
179.969	138.72	174.66	179.97	178.96	201.45	154.09	179.968	240.9	205.05	179.968	211.79	214.45	200.85	179.969	204.62	205.8	179.969	241.53	246.36	239.47	179.968	201.36	206.05	179.969	199.18	202.69	179.97	179.41	179.968	181.14	191.75	191.81	180.671	196.87	217.46	224.99	179.968	178.1	169.04	188.35	179.967	206.85	174.64	179.968	205.81	262.66	179.967	223.54	179.97
180.669	138.73	174.5	180.67	177.45	201.65	154.17	180.668	242.24	204.58	180.668	211.63	214.5	200.57	180.668	204.43	205.73	180.669	242.01	246	239.69	180.668	201.28	206.77	180.669	200.17	202.14	180.669	179.73	180.669	181.72	191.3	192.05	181.365	196.71	217.45	225.16	180.668	178.13	169.65	188.7	180.667	207.69	174.61	180.667	205.61	262.94	180.668	223.92	180.67
181.364	138.98	175	181.37	178.41	201.56	154.67	181.368	256.54	204.65	181.368	211.39	214.35	200.38	181.364	204.24	205.67	181.365	242.14	245.75	237.45	181.368	201.22	206.14	181.369	199.85	202.71	181.369	179.8	181.369	181.69	191.27	192.98	182.067	194.54	217.85	224.87	181.368	178.21	169.66	189.16	181.363	207.2	174.61	181.368	205.7	263.11	181.369	224.01	181.369
182.068	139.42	174.36	182.07	177.63	201.32	154.38	182.068	259.44	204.34	182.07	211.81	214.18	200.66	182.068	203.7	205.92	182.067	242.58	245.3	237.37	182.068	201.38	205.88	182.069	199.52	207.94	182.07	179.13	182.068	182.24	190.99	193.41	182.769	194.96	216.64	225.24	182.069	178.18	168.3	193.58	182.068	207.39	174.46	182.069	205.54	263.22	182.069	223.99	182.069
182.768	139.48	173.89	182.768	177.55	201.31	154.65	182.768	256.95	203.8	182.77	207.53	214.45	200.58	182.768	203.53	205.94	182.768	242.07	244.93	237.61	182.769	201.15	206.55	182.768	199.59	206.41	182.769	178.99	182.768	182.31	190.67	193.51	183.47	194.9	216.8	224.96	182.767	178.27	167	194.11	182.769	207.81	174.58	182.768	205.25	263.2	182.77	224.09	182.769
183.469	139.33	173.58	183.469	177.28	201.28	154.02	183.468	253.39	204.28	183.47	207.02	214.04	200.47	183.47	203.86	205.62	183.469	241.54	244.85	234.76	183.467	201.44	206.38	183.468	199.13	201.89	183.469	178.12	183.469	181.93	190.98	193.57	184.17	195.13	216.86	224.85	183.468	178.34	169.5	192.76	183.469	207.35	174.53	183.468	205.34	263.18	183.468	223.8	183.468
184.168	139.6	176.9	184.17	177.25	201.16	154.64	184.168	252.21	203.68	184.169	206.74	214.08	200.18	184.168	203.91	205.72	184.168	241.22	244.89	233.75	184.168	201.27	207.41	184.168	199.22	202	184.169	176	184.169	182.03	190.96	193.82	184.864	196.14	217.22	224.96	184.168	178.47	171.25	192.68	184.169	208.95	174.53	184.169	205.23	263.18	184.17	223.9	184.169
184.869	138.15	182.13	184.869	176.97	202.02	154.13	184.868	252.61	203.93	184.87	207.62	214.05	200.54	184.868	203.9	205.68	184.869	241.2	244.46	234.77	184.868	200.79	207.3	184.87	199.03	200.67	184.869	174.88	184.868	182.1	191.21	193.76	185.568	196.72	217.38	225.01	184.869	178.67	170.49	191.93	184.863	216.54	174.75	184.869	205.45	263.05	184.87	223.22	184.869
185.569	135.64	181.13	185.569	177.1	201.69	154.54	185.567	251.52	203.32	185.569	210.29	213.93	200.54	185.568	207.66	205.82	185.569	240.6	244.41	233.68	185.568	195.34	207.52	185.568	198.25	202.25	185.569	176.21	185.568	181.7	191.06	193.37	186.268	197.45	216.85	224.66	185.568	178.63	170.22	191.48	185.569	217.5	174.98	185.568	205.18	263.31	185.569	215.3	185.569
186.268	136.16	177.35	186.267	176.95	201.81	154.51	186.266	250.6	204.32	186.269	212.69	214.1	200.51	186.269	206.18	205.92	186.27	241.28	255.3	234.8	186.268	194.46	205.6	186.269	196.66	202.53	186.268	177.23	186.269	182.09	191.04	193.58	186.969	197.5	217.27	224.67	186.268	178.76	170.07	190.93	186.268	212.73	174.37	186.268	205.45	262.87	186.27	209.04	186.269
186.968	136.76	180.85	186.968	176.8	201.44	154.54	186.968	248.67	209.7	186.969	215.06	214.32	200.21	186.968	204.32	205.79	186.968	240.98	258.71	233.97	186.968	194.15	198.05	186.968	197.95	202.91	186.97	178.14	186.97	182.44	191.41	193.57	187.67	197.81	217.72	224.95	186.968	178.64	169.96	190.69	186.968	209.85	168.98	186.969	205.38	258.86	186.969	209.96	186.97
187.668	136.97	177.38	187.668	180.73	202.29	154.81	187.668	245.72	212.8	187.669	215.74	214.51	200.1	187.669	204.05	205.77	187.669	240.98	255.53	235.46	187.668	196.76	198.72	187.669	198.16	202.73	187.668	179.13	187.669	182.33	191.45	194.07	188.365	197.98	217.42	224.59	187.669	178.58	169.92	190.19	187.67	207.58	168.37	187.669	205.38	252.84	187.669	216.51	187.668
188.368	137.8	174.94	188.369	181.24	201.73	154.72	188.368	245.48	214.83	188.369	216.34	214.46	201.5	188.363	203.95	205.37	188.364	240.5	253.09	234.7	188.37	198.74	199.05	188.37	198.85	202.35	188.37	179.54	188.368	182.16	191.57	194.09	189.067	197.68	217.49	224.42	188.367	178.48	170.56	189.95	188.365	207.8	168	188.369	205.56	251.92	188.369	219.96	188.369
189.069	138.07	174.15	189.067	180.34	202.12	155.53	189.067	243.66	213.2	189.07	216.82	214.21	211.21	189.068	203.79	205.36	189.068	239.62	252.16	233.64	189.069	199.39	200.29	189.07	199.28	202.94	189.069	180.07	189.069	182.14	190.93	193.9	189.768	198.18	217.85	224.13	189.067	178.53	167.6	190.15	189.067	208.38	168.8	189.069	204.1	253.17	189.069	221.3	189.069
189.77	138.25	173.53	189.768	179.9	201.44	154.86	189.767	243.65	211.09	189.769	216.87	214.71	211.95	189.768	203.88	205.31	189.767	242.23	256.94	234.3	189.769	200.68	200.68	189.77	199.59	202.04	189.769	180.24	189.769	182.4	191.17	193.81	190.47	198.31	217.65	224.33	189.767	178.4	167.3	190.56	189.77	208.4	171.05	189.768	200.54	256.39	189.769	221.71	189.77
190.469	138.38	173.04	190.469	178.3	201.56	155.41	190.468	243.34	208.72	190.468	216.52	214.39	210.21	190.468	204.04	205.84	190.469	247.74	257.61	233.41	190.468	200.96	201.56	190.47	199.18	202.15	190.469	180.17	190.469	182.84	191.26	193.77	191.17	198.87	217.57	224.6	190.468	178.28	169.72	189.44	190.468	207.97	172.04	190.468	198.24	257.49	190.469	222.53	190.47
191.169	138.98	172.69	191.169	177.47	201.45	154.97	191.167	243.08	208.13	191.168	216.22	214.2	202.47	191.169	204.02	205.62	191.167	247.7	256	233.36	191.17	200.83	201.07	191.168	199.04	201.91	191.167	179.86	191.167	180	191.11	194.2	191.864	198.6	217.63	224.61	191.168	178.29	170.53	190.37	191.168	207.66	172.21	191.169	197.46	259.54	191.169	222.88	191.169
191.863	139.35	172.68	191.869	178	201.36	155.24	191.868	241.29	208.05	191.868	215.68	214.28	200.25	191.868	205.16	204.74	191.868	248.09	253.39	237.74	191.87	201.12	202.67	191.871	198.97	202.17	191.869	179.89	191.867	178.33	190.84	192.99	192.569	198.6	217.6	226.53	191.868	177.88	170.01	190.2	191.864	207.11	172.76	191.87	198.81	260.46	191.869	223.11	191.869
192.569	139.42	172.72	192.569	177.29	201.82	154.81	192.568	242.47	207.44	192.569	215.39	214.42	198.95	192.567	204.15	204.95	192.567	245.66	252.91	247.36	192.568	201.21	203.99	192.569	198.15	201.83	192.568	179.61	192.57	178.67	191.24	191.51	193.269	198.92	217.65	229.4	192.568	178.27	169.46	190.18	192.568	207.4	173.01	192.568	202.6	261.11	192.569	222.86	192.569
193.269	139.19	172.89	193.267	177.76	201.91	155.19	193.268	241.04	205.82	193.268	215.19	214.38	200.62	193.268	204.11	205.41	193.268	244.18	252.74	252.76	193.269	201.34	204.22	193.268	196.11	202.11	193.268	179.63	193.267	178.12	190.46	191.05	193.97	198.68	217.79	228.24	193.268	178.1	169.39	190.18	193.269	207.69	173.33	193.27	202.9	261.55	193.268	222.92	193.269
193.967	139.49	172.99	193.969	176.84	201.77	155.08	193.969	241.96	206.2	193.968	214.93	214.21	201.34	193.968	203.72	205.44	193.969	244.32	252.27	243.39	193.969	201.54	204.3	193.967	197.41	201.69	193.969	179.46	193.968	180.12	189.52	191.06	194.67	198.79	217.65	227.13	193.968	178.34	169.63	189.86	193.97	208.11	173.34	193.97	203.93	261.23	193.968	222.83	193.968
194.668	139.71	173.03	194.669	177.1	201.66	155.1	194.669	241.27	204.93	194.668	215.15	214.32	201.34	194.668	203.63	205.75	194.669	243.16	252.14	241.16	194.668	201.18	204.84	194.669	198.75	201.8	194.669	179.62	194.669	181.14	188.3	192.22	195.364	198.93	218.4	226.19	194.668	178.48	169.77	189.38	194.669	208.14	173.51	194.668	204.5	261.89	194.669	222.68	194.669
195.364	139.79	173.03	195.369	176.66	201.85	154.82	195.369	241.13	204.76	195.365	214.72	214.19	201.74	195.368	204.05	205.44	195.363	242.86	251.43	237.04	195.369	201.22	205	195.369	199.79	202.6	195.369	176.39	195.369	181.54	188.08	192.59	196.068	199	218.72	226.33	195.369	178.64	169.95	189.5	195.365	210.19	173.68	195.37	204.23	261.7	195.369	222.73	195.37
196.068	139.26	173.13	196.068	176.54	201.97	155.31	196.069	242.01	205.1	196.069	214.43	214.41	201.8	196.068	203.98	205.66	196.067	241.4	252.48	232.61	196.068	202.01	205.31	196.069	199.28	202.81	196.069	174.71	196.067	181.49	188.24	192.69	196.77	199.13	218.88	226.48	196.066	178.57	169.57	189.81	196.068	213.77	173.39	196.069	203.9	262.96	196.068	219.31	196.069
196.768	137.25	173.09	196.768	176.44	202.09	155.04	196.768	240.84	204.59	196.768	214.38	214.17	201.6	196.77	204.27	205.38	196.768	241.47	251.56	232.81	196.768	202.06	205.75	196.768	199.09	202.49	196.769	175.04	196.767	180.79	188.78	192.95	197.47	199.28	219.02	225.53	196.768	178.68	167.61	189.42	196.77	216.8	173.43	196.768	204.2	258.76	196.768	210.12	196.769
197.469	135.8	173.16	197.468	176.49	202.17	154.6	197.467	261.81	204.81	197.468	214.42	214.39	201.8	197.469	204.72	205.64	197.469	242.07	251.26	235.92	197.47	202.03	205.88	197.469	198.48	203.02	197.469	175.49	197.467	181.41	188.96	193.26	198.169	199.3	218.65	224.9	197.466	178.94	167.97	193.78	197.468	213.37	173.75	197.469	204.63	255.93	197.468	209.68	197.469
198.167	134.57	178.52	198.169	179.21	201.71	155.1	198.167	257.75	204.85	198.168	213.7	214.43	201.74	198.166	204.26	205.38	198.17	241.63	249.1	234.09	198.169	202.26	206.23	198.169	198.29	205.33	198.168	176.7	198.167	181.5	189.79	193.25	198.866	199.12	218.38	225.18	198.168	178.94	170.92	195.07	198.168	210.05	173.39	198.169	202.57	256.02	198.169	214.28	198.17
198.864	136.73	179.39	198.87	180.58	202	155.03	198.868	252.39	208.43	198.868	213.7	214.4	201.83	198.869	204.29	205.51	198.864	241.54	249.86	235.46	198.869	202.01	206.54	198.868	196.88	209.81	198.87	177.96	198.867	182.4	189.79	191.26	199.569	199.23	218.62	225.46	198.867	178.93	170.47	194	198.863	208.13	173.79	198.868	199.81	257.63	198.87	219.22	198.869
199.569	137.82	180.46	199.568	180.6	200.75	153.54	199.569	249.39	214.28	199.568	213.05	214.95	201.82	199.569	204.16	205.29	199.569	241.52	247.89	232.88	199.568	201.98	206.78	199.569	196.38	205.27	199.569	178.3	199.568	180.1	190.3	191.13	200.27	199.07	218.56	224.77	199.567	178.63	170.61	192.37	199.567	208.78	173.76	199.568	199.31	258.43	199.569	221.14	199.569
200.27	137.55	180.55	200.268	180.32	196.84	153.66	200.268	247.32	214.73	200.269	213.08	211.21	201.88	200.269	204.25	204.61	200.269	241.61	248.76	232.4	200.269	201.59	207.24	200.269	197.06	200.89	200.269	178.93	200.267	179.03	190.08	190.79	200.97	199.15	219.18	224.85	200.267	178.77	169.7	191.23	200.268	208.59	174.37	200.267	201.35	259.59	200.268	221.79	200.268
200.969	138.24	176.85	200.967	178.8	195.54	154.17	200.969	249.62	214.13	200.969	213.04	208.11	201.94	200.968	203.64	205.18	200.97	247.69	247.86	232.97	200.967	202.36	207.2	200.969	198.52	201.43	200.969	179.17	200.967	179.51	190.1	191.86	201.669	199.08	218.7	224.5	200.968	178.55	170.18	191.26	200.968	208.94	173.8	200.969	202.94	260.71	200.968	222.24	200.968
201.669	138.87	175.04	201.669	177.61	196.54	154.87	201.668	249.48	211.45	201.668	212.27	210.86	203.82	201.669	204.25	204.95	201.668	249.44	248.71	234.32	201.667	201.86	207.63	201.669	199.1	201.09	201.669	179.28	201.667	180.61	190.22	192.63	202.363	198.97	219.03	225.09	201.666	178.73	169.88	190.46	201.668	208.82	174.03	201.668	204.6	260.87	201.668	222.54	201.67
202.365	138.89	173.26	202.369	178.05	199.1	154.8	202.369	245.91	209.87	202.369	212.38	215.05	210.48	202.368	204.5	204.78	202.365	248.91	247.02	234.56	202.367	202.21	207.95	202.368	199.44	202.04	202.369	178.98	202.368	181.35	190.31	192.6	203.068	198.95	218.58	224.72	202.366	178.47	169.82	189.72	202.364	208.53	174.33	202.369	205.3	261.35	202.37	222.73	202.369
203.069	138.74	172.67	203.069	177.55	200.06	155.38	203.069	243.25	208.81	203.069	212.26	216.29	208.64	203.068	204.67	204.85	203.069	245.72	247.38	234.11	203.069	202.46	207.84	203.069	199.17	201.92	203.068	178.98	203.067	181.72	190.37	192.95	203.769	198.56	218.74	224.7	203.066	178.73	169.54	190.48	203.068	208.24	173.96	203.068	205.51	261.6	203.069	222.38	203.069
203.769	139.25	172.4	203.769	177.69	201.87	154.27	203.77	243.07	205.75	203.767	212.38	216.38	201.92	203.769	204.46	204.89	203.768	248.04	246.65	234.24	203.768	202.36	207.77	203.77	198.73	201.97	203.768	179.08	203.767	181.25	190.38	192.99	204.468	198.19	218.92	224.41	203.767	178.72	166.86	190.65	203.769	208.13	173.84	203.768	205.08	261.26	203.77	222.38	203.77
204.469	139.28	172.13	204.468	177.75	201.66	154.85	204.47	241.44	206.79	204.469	212.33	215.76	199.4	204.469	204.29	204.81	204.469	245.14	245.29	234.18	204.468	202.28	208.05	204.469	199.01	202.66	204.469	178.9	204.468	181.67	190.09	193.47	205.17	196.95	218.46	224.66	204.467	178.91	167.2	190.23	204.467	208.62	173.86	204.468	204.93	261.5	204.469	222.31	204.469
205.169	139.51	171.85	205.171	177	201.75	155.25	205.167	242.38	207.2	205.169	211.85	216.25	199.23	205.169	204.22	204.83	205.169	243.89	254.7	233.68	205.167	201.68	208.06	205.167	198.25	202.09	205.168	178.93	205.167	181.59	189.52	192.45	205.864	196	218.99	224.98	205.167	179.01	170.3	190.37	205.168	207.64	174.01	205.168	204.89	261.73	205.171	218.98	205.17
205.866	139.86	171.29	205.867	176.74	201.58	155.19	205.869	242.02	207.09	205.869	212.1	215.76	200.51	205.868	204.29	205.09	205.869	242.17	261.93	234.34	205.869	201.79	207.97	205.869	199.07	201.65	205.87	178.89	205.868	181.52	189.98	190.76	206.568	193.82	218.39	224.45	205.868	178.82	170.37	190.1	205.863	208.24	174.06	205.868	205.41	261.72	205.869	210.4	205.871
206.569	139.89	171.52	206.568	176.53	201.9	155.55	206.567	241.94	206.7	206.569	212.22	215.22	201.15	206.568	204.29	205.15	206.569	242.69	258.25	234.15	206.567	202.08	208.35	206.569	196.24	201.51	206.569	179.21	206.568	178.85	189.77	190.72	207.27	194.94	219.14	224.01	206.567	178.89	170.43	189.71	206.567	207.81	174.11	206.568	206.12	262.37	206.57	210	206.569
207.269	139.92	171.1	207.268	176.83	202.33	155.26	207.268	241.9	207.12	207.268	212.3	215.25	201.76	207.268	204.19	204.79	207.269	241.5	252.46	233.35	207.267	202.03	208.42	207.269	197.96	200.66	207.269	179.49	207.268	179.43	190.21	190.51	207.968	195.3	218.27	224.39	207.266	178.74	169.96	189.77	207.267	208.22	174.29	207.269	206.01	262.21	207.27	215.47	207.269
207.969	139.92	171.16	207.97	176.4	202.84	155.51	207.967	240.65	205.89	207.969	211.8	215.44	201.35	207.97	204.11	205.03	207.968	241.39	252.56	233.7	207.968	201.9	208.89	207.968	199.77	207.15	207.969	178.19	207.968	180.14	190.43	191.93	208.669	195.38	218.43	224.46	207.968	178.85	170.02	189.68	207.967	207.96	173.95	207.968	205.8	262.76	207.969	220	207.968
208.67	140.02	171.44	208.67	176.36	202.39	155.25	208.669	240.6	205.94	208.669	211.67	215.56	201.37	208.669	203.97	204.78	208.669	241.01	250.97	234.03	208.667	202.18	208.75	208.669	199.94	204.3	208.668	175.86	208.668	181.9	190.29	192.98	209.364	196.65	218.41	224.94	208.666	178.8	169.82	189.28	208.669	208	174.06	208.668	206.22	257.61	208.669	221.26	208.67
209.369	140.27	171.87	209.369	176.2	202.4	155.69	209.367	241.21	206.13	209.369	212.08	215.49	201.64	209.368	204.05	204.66	209.363	241.09	249.94	239.59	209.367	201.93	208.45	209.368	198.77	201.62	209.369	174.19	209.368	181.45	190.12	193.01	210.067	195.86	218.26	224.71	209.368	174.4	169.82	189.89	209.364	208.3	173.79	209.369	206.03	252.29	209.369	221.79	209.371
210.07	140.4	171.86	210.07	176.42	199.04	155.44	210.067	241.03	205.09	210.069	211.65	215.4	201.25	210.068	204.59	205.4	210.069	239.96	250.24	249.66	210.068	202	208.81	210.069	198.69	201.93	210.068	175.89	210.068	181.42	190.35	193.6	210.769	195.93	218.54	224.76	210.068	170.24	169.96	189.75	210.068	207.31	173.95	210.069	205.7	252.56	210.071	222.44	210.069
210.769	140.5	171.53	210.77	175.78	198	155.51	210.767	241.25	205.3	210.768	211.96	214.96	201.38	210.768	204.15	205.22	210.767	240.72	249.52	251.23	210.768	202.26	208.98	210.769	198.02	201.7	210.767	176.64	210.767	181.33	190.48	193.36	211.469	195.84	217.04	224.65	210.768	170.89	168.92	189.52	210.768	214.86	174.01	210.768	205.41	253.8	210.769	222.9	210.77
211.468	140.68	171.26	211.469	175.7	198.8	155.15	211.468	240.14	210.96	211.468	211.39	214.86	201.28	211.469	203.9	204.4	211.467	240.47	248.65	242.34	211.47	201.85	208.72	211.469	198.24	202.35	211.469	177.48	211.469	181.58	190.35	193.5	212.169	195.75	213.11	224.14	211.467	174.57	167.05	190.12	211.47	218.75	173.7	211.468	205.08	256.52	211.469	222.92	211.47
212.17	140.54	170.85	212.168	175.75	201.87	154.9	212.17	240.32	212.34	212.168	211.39	214.78	201.44	212.169	203.98	200.59	212.167	240.46	249	231.03	212.17	201.99	208.65	212.169	198.26	202.74	212.167	179.1	212.167	181.71	190.5	193.6	212.865	195.99	210.7	224.02	212.167	175.89	168.77	190.17	212.168	217.65	171.25	212.169	205.13	258.19	212.168	222.79	212.17
212.864	140.84	170.85	212.87	175.78	202.28	155.23	212.869	243.93	207.91	212.867	211.68	214.68	201.29	212.869	204.49	199.85	212.864	241.21	248.22	232.41	212.87	200.67	199.34	212.869	198.65	202.96	212.869	180.18	212.867	179.45	190.35	193.61	213.569	196.94	210.05	224.66	212.868	176.18	170.44	189.67	212.863	211.6	168.61	212.869	205.32	259.26	212.87	222.72	212.866
213.571	140.35	171.21	213.57	179.01	202.07	155.31	213.568	259.97	205.61	213.568	211.35	215.1	201	213.568	204.18	201.46	213.568	242.12	247.07	233.67	213.57	202.09	194.23	213.568	195.8	202.82	213.567	180.14	213.568	178.53	190.47	193.61	214.268	197.33	211.46	224.24	213.568	176.59	170	189.98	213.567	208.94	167.28	213.568	205.78	260.41	213.569	222.62	213.57
214.269	137.62	171.95	214.27	180.42	202.49	155.05	214.268	258.29	205.79	214.268	211.99	214.94	200.99	214.269	210.61	203.74	214.269	240.56	253.71	233.43	214.269	201.4	196.6	214.267	196.17	201.2	214.267	180.1	214.268	179.41	190.47	194.03	214.969	197.25	212.93	223.66	214.268	176.68	170.12	194.71	214.268	208.42	168.07	214.268	205.65	260.51	214.269	222.75	214.27
214.969	136.95	178.86	214.969	181.01	202.46	154.21	214.97	255.93	204.86	214.968	210.89	214.04	200.8	214.969	216.07	203.99	214.968	240.26	256.15	233.4	214.969	202.31	199.7	214.97	196.49	206.34	214.968	179.95	214.969	181.21	190.22	193.75	215.669	197.57	214.45	225.02	214.969	177.38	170.12	195.25	214.968	208.99	169.59	214.97	205.63	261.01	214.968	222.55	214.971
215.669	136.02	179.39	215.669	180.82	202.94	151.84	215.668	255.91	205.12	215.668	211.29	214.2	200.88	215.669	212.55	204.08	215.669	239.85	254.28	233.94	215.67	202.23	200.99	215.668	198	202.99	215.669	179.15	215.669	181.04	189.55	194.01	216.369	197.94	215.46	225.99	215.668	177.58	169.44	195.52	215.669	209.4	171.07	215.668	205.57	259.78	215.67	212.19	215.669
216.369	136.9	181.02	216.368	180.57	202.61	152.35	216.369	251.49	204.7	216.363	211.57	214.3	201.11	216.369	209.1	204	216.369	247.1	252.89	234.2	216.371	202.65	201.64	216.369	199.06	200.5	216.368	179.55	216.367	181.22	189.32	191.72	217.068	198.01	215.75	225.91	216.37	177.58	169.62	192.3	216.363	209.44	172.28	216.37	205.73	258.5	216.364	207.92	216.37
217.068	136.84	179.14	217.07	178.69	202.56	153.18	217.069	249.53	204.6	217.068	210.7	212.07	200.74	217.069	209.31	204.48	217.068	248.1	252.97	235.09	217.07	202.31	202.44	217.069	199.35	202.14	217.068	176.6	217.068	181.21	189.28	191.04	217.768	198.01	216.36	226.18	217.068	177.59	169.82	191.4	217.068	208.47	173.04	217.07	205.82	258.05	217.068	209.38	217.069
217.77	137.03	178.2	217.769	179.17	202.74	153.6	217.77	245.8	204.48	217.768	211.19	209.39	200.71	217.77	207.56	204.95	217.768	246.1	250.49	235.27	217.77	202.16	203.19	217.769	199.06	201.37	217.767	175.57	217.768	181.02	189.42	190.58	218.469	198.49	216.72	226.58	217.767	177.59	168.9	190.67	217.77	209.2	173.47	217.769	205.84	257.31	217.77	216.53	217.769
218.468	138.1	176.09	218.469	177.38	202.55	154.3	218.469	245	204.24	218.468	210.95	211.33	202.42	218.468	205.86	204.97	218.468	246.45	251.61	234.86	218.47	202.22	202.97	218.469	198.47	202.23	218.467	176.85	218.468	181.54	189.47	190.79	219.17	198.52	216.63	225.43	218.468	177.73	168.28	190.35	218.468	208.68	173.46	218.469	206.18	257.88	218.469	219.32	218.471
219.169	138.07	174.88	219.169	178.03	202.78	154.91	219.169	244.07	204.35	219.168	210.7	214.98	211.65	219.171	205.62	204.9	219.168	248.4	251.4	239.32	219.17	202.16	203.88	219.169	198.56	202.02	219.169	176.47	219.17	181.31	189.88	191.68	219.864	198.94	217.13	224.6	219.167	177.62	166.36	189.76	219.168	208.85	174.08	219.169	206.1	259.61	219.169	220.29	219.171
219.864	139.35	173.89	219.869	177.74	203.63	154.5	219.869	242.82	203.44	219.869	210.86	216.37	211.28	219.87	205.39	205.27	219.868	248.28	249.12	248.69	219.87	202.29	205.39	219.869	198.6	202.85	219.869	178.35	219.868	181.72	190.01	192.05	220.569	199.25	217.25	224.41	219.868	177.8	169.64	190.2	219.863	208.23	173.97	219.867	206.2	260.43	219.87	221.11	219.87
220.569	139.52	173.09	220.569	177.52	203.22	155	220.569	242.72	203.04	220.568	210.38	217.2	207.36	220.568	205.1	205.25	220.569	244.51	249.14	249.25	220.568	202.22	205.47	220.568	199.12	203.09	220.568	179.59	220.569	179.65	190.72	192.79	221.27	199.13	217.39	224.21	220.569	177.97	169.63	190.47	220.567	211.93	174.13	220.568	205.87	261.29	220.569	221.56	220.57
221.269	139.62	172.02	221.268	176.94	203.69	155.36	221.269	241.7	203.46	221.269	210.77	216.45	202.38	221.268	204.93	205.88	221.269	244.07	249.89	237.27	221.268	202.18	205.65	221.268	195.97	203.69	221.269	180.21	221.268	178.98	190.83	192.86	221.97	199.3	217.07	224.49	221.267	178.04	169.73	189.94	221.268	215.64	174.37	221.269	205.75	261.76	221.269	222.04	221.269
221.97	140.01	172.07	221.968	177.22	203.4	154.81	221.968	242.65	203.66	221.968	211.09	216.06	199.45	221.968	204.52	205.97	221.969	243.01	249.53	238.62	221.968	202.26	206.26	221.969	196.43	203.18	221.969	179.85	221.968	178.08	191.03	193.17	222.669	199.05	217.42	224.65	221.968	178.15	169.68	190.09	221.967	215.25	174.41	221.969	205.67	261.9	221.969	222.45	221.971
222.669	140.09	171.76	222.669	177.09	203.18	155.36	222.669	241.04	203.5	222.668	210.82	216.06	200.29	222.67	204.59	206.02	222.668	241.8	249.3	235.35	222.669	201.86	200.07	222.669	196.8	202.27	222.669	179.65	222.669	178.94	190.67	192.11	223.365	199.22	217.55	224.52	222.668	178.55	169.32	190.02	222.667	211.47	174.25	222.667	205.78	261.72	222.669	222.12	222.669
223.363	139.94	170.87	223.369	176.95	202.93	155.4	223.369	240.55	203.73	223.371	209.89	215.59	200.52	223.368	204.7	205.95	223.368	241.62	248.44	234.92	223.368	200.38	199.51	223.369	199.15	202.17	223.369	179.55	223.369	180.31	190.84	191.35	224.067	199.28	217.36	224.6	223.369	178.36	169.49	190.3	223.363	208.42	174.62	223.368	205.54	261.47	223.365	222.34	223.369
224.069	139.64	171.23	224.069	176.51	202.81	155.61	224.068	240.27	204.06	224.069	210.46	215.42	200.96	224.07	204.17	206.27	224.068	241.98	248.23	233.05	224.068	202.48	200.91	224.069	199.61	204.81	224.069	178.98	224.068	181.07	191.38	191.45	224.769	199.03	217.89	224.78	224.069	178.26	169.21	190.16	224.068	208.81	174.49	224.068	205.47	261.74	224.068	220.33	224.068
224.769	139.99	171.21	224.769	176.12	203.06	155.37	224.77	241.12	204.37	224.77	210.09	215.39	201.46	224.769	204.39	205.67	224.769	241.59	247.97	233.57	224.768	200.91	201.29	224.77	199.71	206.82	224.768	179.08	224.768	181.43	191.15	191.8	225.468	199.24	218.68	225.09	224.767	178.33	169.23	190.49	224.768	208.62	174.79	224.769	205.47	261.69	224.77	210.34	224.768
225.469	139.93	171.39	225.469	176.02	203.16	155.15	225.47	240.39	214.82	225.47	210.06	215.92	201.89	225.469	204.06	205.73	225.469	241.96	247.88	233.68	225.468	201.31	202.4	225.466	199.29	203.32	225.469	179.15	225.469	181.54	191.22	193.33	226.169	199.46	218.28	224.31	225.467	178.2	169.08	190.25	225.469	208.25	174.91	225.469	205.08	261.62	225.469	208.2	225.469
226.168	140.25	171.43	226.17	176.3	202.17	155.45	226.168	239.51	218.11	226.17	210.25	215.55	201.86	226.169	204.08	205.8	226.17	241.86	248.22	233.77	226.169	202.18	202.04	226.169	198.59	199.98	226.169	179.42	226.168	181.53	190.54	193.58	226.863	199.19	218.39	224.45	226.167	178.32	169.19	190.16	226.169	208.26	174.87	226.167	205.4	261.87	226.17	213.47	226.169
226.866	140.41	172.07	226.869	175.62	200.18	155.28	226.868	240.69	216.93	226.868	210.15	215.69	202.27	226.868	203.58	205.78	226.864	241.69	246.33	233.97	226.869	202.27	203.19	226.87	198.76	201.11	226.869	179.21	226.869	181.73	190.48	193.28	227.567	199.1	218.66	224.5	226.868	178.56	168.72	190.21	226.863	208.59	175.14	226.869	204.99	262.13	226.87	218.7	226.869
227.569	140.27	172.48	227.568	175.46	198.34	155.71	227.568	240.7	214.98	227.57	210.58	215.29	202.16	227.568	204.27	205.56	227.568	242.09	246.49	234.68	227.568	202.71	203.88	227.568	199.12	201.27	227.571	179.35	227.569	181.86	190.41	193.68	228.269	199.26	218.68	224.74	227.567	178.41	167.76	189.76	227.569	207.99	174.76	227.567	204.83	261.93	227.57	220.31	227.568
228.27	140.03	179.03	228.267	175.27	199.03	155.72	228.268	241.02	215.54	228.269	210.35	215.81	202.16	228.269	204.19	205.56	228.268	241.62	244.22	235.78	228.268	202.64	205.66	228.27	197.71	201.51	228.268	179.53	228.269	180.39	189.33	193.58	228.969	199.22	218.74	224.71	228.268	178.7	167.51	190.14	228.268	207.93	174.85	228.268	204.53	259.15	228.27	221.07	228.27
228.968	138.46	180.05	228.969	175.42	201.34	155.57	228.968	241.06	214.71	228.969	210.1	215.78	202.07	228.969	203.9	205.51	228.968	241.38	257.4	244.61	228.968	202.59	205.72	228.97	196.96	201.82	228.969	178.57	228.969	179.18	189.12	193.78	229.668	199.17	218.75	224.11	228.969	178.84	169.54	190.62	228.967	208.06	174.6	228.968	204.03	254.01	228.969	221.25	228.97
229.669	136.48	182.98	229.669	176.89	201.52	154.94	229.668	241.32	214.01	229.67	210.74	215.49	201.96	229.669	204.09	205.25	229.668	240.5	259.82	247.36	229.668	202.23	206.16	229.67	197.77	202.79	229.668	176.34	229.669	178.58	189.59	191.78	230.364	199.25	218.57	224.44	229.669	178.52	170.16	190.9	229.67	208.18	174.81	229.667	201.93	253.48	229.67	221.44	229.67
230.365	135.92	182.18	230.369	179.83	202.47	155.12	230.368	240.94	210.2	230.37	210.2	215.66	201.49	230.369	212.02	205.17	230.369	240.44	256.7	240.78	230.37	202.59	206.08	230.365	198.87	202.6	230.369	174.04	230.369	179.89	189.8	191.84	231.067	199.05	218.62	224.25	230.369	178.89	170.7	190.71	230.364	208.1	174.57	230.369	197.99	253.24	230.369	221.89	230.369
231.068	137.3	181.38	231.067	180.43	202.72	154.84	231.068	240.94	208.86	231.07	210.76	215.5	201.33	231.068	216.98	206.17	231.069	240.5	250.02	233.73	231.07	202.64	206.55	231.07	199.6	202.93	231.07	175.11	231.07	181.54	190.41	191.24	231.77	199.23	218.76	224.11	231.069	178.7	170.25	190.76	231.068	208.11	174.43	231.068	196.96	256.15	231.068	221.91	231.07
231.768	137.94	177.52	231.768	179.67	202.45	155.54	231.768	242.33	208.92	231.77	207.39	215.36	201.39	231.769	214.39	205.05	231.768	241.04	250.98	235.11	231.77	202.41	206.21	231.771	199.91	202.69	231.769	176.24	231.768	181.42	190.59	191.69	232.468	198.72	218.97	223.65	231.767	178.75	169.85	191.14	231.769	208.22	172.28	231.768	198.57	257.95	231.768	221.61	231.768
232.471	138.33	176.49	232.468	180.25	203.12	155.37	232.467	255.78	208.93	232.469	206.75	214.99	202.53	232.468	211.68	202.51	232.468	240.39	250.82	234.65	232.47	202.65	206.07	232.465	199.47	202.07	232.47	177.25	232.468	181.18	190.68	191.62	233.171	199.14	218.77	224.33	232.468	178.9	169.9	190.52	232.469	208.22	169.7	232.468	202.82	259.42	232.468	221.75	232.469
233.17	139.21	175.47	233.169	179.03	202.85	155.78	233.168	260.24	208.88	233.169	206.87	212.55	207.07	233.17	212.03	201.95	233.168	239.43	249.57	232.99	233.169	202.83	206.21	233.169	199.12	201.95	233.17	178.63	233.167	181.26	190.62	193.04	233.868	199.09	218.79	223.44	233.168	178.77	169.74	190.13	233.168	207.86	168.83	233.169	203.82	259.77	233.168	212.96	233.168
233.865	139.86	174.52	233.87	178.62	203.17	155.71	233.869	254.93	209.71	233.864	206.2	208.73	211.61	233.869	211.62	203.68	233.863	239.48	248.6	232.37	233.869	202.6	206.7	233.871	198.79	201.93	233.87	178.95	233.869	181.21	190.86	193.57	234.568	199.12	219.05	223.7	233.869	178.68	169.75	190.11	233.864	208.04	169.78	233.869	204.05	260.71	233.869	208.15	233.868
234.567	139.99	173.89	234.57	178.03	203.15	155.52	234.568	250.93	209.43	234.569	208.56	210.32	207.02	234.569	209.67	203.97	234.567	239.94	248.49	232.95	234.569	202.61	206.62	234.571	198.71	201.85	234.568	179.27	234.568	181.28	190.92	193.51	235.268	199.09	219.14	223.41	234.569	178.87	169.44	190.74	234.568	207.99	169.88	234.567	204.19	261.21	234.568	210.58	234.568
235.267	140.3	173.37	235.268	177.6	203.41	155.43	235.269	249.72	208.74	235.269	211.54	214.1	201.32	235.269	206.85	204.14	235.269	240	247.97	237.42	235.269	202.6	207.06	235.268	198.17	202.25	235.268	179.5	235.268	181	190.86	191.84	235.968	199.07	218.93	223.5	235.269	178.82	167.33	190.07	235.27	208.52	171.63	235.268	204.01	261.13	235.268	216.68	235.268
235.969	140.18	172.76	235.97	177.85	203.23	155.58	235.967	249.4	208.98	235.969	213.46	216.28	200.39	235.969	206.32	203.84	235.968	239.52	248.49	242.76	235.969	202.14	206.93	235.969	194.79	202.27	235.968	179.71	235.967	180.49	190.86	191.65	236.669	199.22	219.14	223.35	235.967	178.87	166.06	190.3	235.968	208.36	172.39	235.968	203.96	261.24	235.967	219.77	235.97
236.668	140.49	172.76	236.67	177.37	203.31	155.6	236.669	249.66	207.01	236.669	214.52	216.28	199.73	236.669	205.9	204.54	236.667	240.17	248.67	244.25	236.668	202.58	207.08	236.67	196.6	202.07	236.669	180.04	236.668	178.76	190.75	191.21	237.364	198.91	219.14	223.18	236.669	178.59	167.3	190.51	236.668	208.08	172.5	236.668	204.4	260.93	236.668	219.69	236.668
237.364	140.37	172.43	237.37	177.25	203.45	155.38	237.369	248.09	216.8	237.369	215.56	216.57	200.46	237.369	205.19	204.78	237.367	250.3	247.65	236.53	237.37	202.12	207.93	237.37	199.03	202.05	237.368	179.7	237.369	178.36	190.96	192.03	238.068	199.07	218.94	223.17	237.369	178.73	170.01	189.87	237.365	208.39	173.02	237.37	205.08	261.37	237.37	220.77	237.371
238.067	140.42	172.58	238.068	177.09	203.07	155.51	238.069	245.29	218.05	238.069	215.77	215.97	201.48	238.069	205.36	205.25	238.067	248.52	248.37	236.69	238.069	202.46	207.66	238.07	199.82	202.24	238.069	179.75	238.068	178.31	189.04	193.25	238.768	199.12	218.58	223.16	238.067	178.75	170.22	189.79	238.068	208.14	173.4	238.07	205.36	261.2	238.068	220.88	238.069
238.768	140.4	173.69	238.769	177.48	200.02	155.1	238.769	243.33	215.05	238.769	216.33	216.05	202.18	238.77	204.87	205.42	238.767	246.94	247.6	235.8	238.77	202.15	207.89	238.766	199.93	202.49	238.768	179.55	238.768	179.33	188.85	193.88	239.47	199.09	218.68	223.02	238.768	178.86	170.37	189.66	238.769	206.86	173.26	238.768	204.81	261.65	238.77	221.26	238.77
239.468	140.25	181.65	239.47	176.96	198.08	155.43	239.469	243.04	209.09	239.47	216.17	215.75	202.11	239.47	204.58	205.52	239.467	243.42	247.51	234.03	239.469	202.87	207.41	239.468	198.85	204.59	239.47	179.16	239.468	180.6	189.07	193.95	240.169	198.99	218.51	223.51	239.469	178.94	170.18	189.63	239.467	213.9	173.49	239.47	199.47	261.73	239.468	221.46	239.47
240.169	140.72	181.72	240.169	177.1	198.65	155.56	240.169	242.32	209.77	240.169	216.26	215.61	201.82	240.169	204.29	205.71	240.169	242.78	246.76	233.18	240.171	202.52	207.87	240.17	198.34	207.47	240.169	178.69	240.168	181.3	189.9	193.78	240.867	196.87	218.98	223.07	240.167	178.62	170.13	189.56	240.171	217.4	173.76	240.167	196.75	261.86	240.165	221.78	240.169
240.865	140.46	182.99	240.869	176.84	199.64	155.26	240.867	242.13	209.12	240.865	215.99	215.33	201.72	240.868	204.33	205.88	240.868	241.62	245.42	232.41	240.869	202.32	207.41	240.869	198.62	202.5	240.869	176.51	240.868	181.26	189.63	193.79	241.568	196.55	219.05	222.95	240.868	178.97	169.98	189.3	240.864	216.6	174.16	240.867	197.8	261.69	240.868	221.15	240.871
241.568	140.64	180.29	241.569	176.81	203.76	152.84	241.569	241.75	209.62	241.569	214.96	215.11	201.56	241.567	203.93	205.78	241.568	241.69	245.23	232.2	241.571	202.26	207.79	241.569	198.5	201.14	241.57	173.72	241.568	180.82	189.98	192.04	242.269	194.84	218.87	223.2	241.568	178.72	169.61	189.36	241.568	212.23	174.3	241.567	201.44	262.04	241.569	221.48	241.568
242.268	140.32	178.07	242.268	178.07	202.59	152.66	242.269	241.6	208.81	242.269	214.89	215.22	201.52	242.268	203.42	205.75	242.269	241.65	246.75	232.87	242.268	202.27	207.72	242.269	198.02	201.34	242.269	174.3	242.268	180.89	190.26	191.43	242.97	194.83	218.36	222.66	242.267	178.7	169.5	188.97	242.267	209.73	174.36	242.268	203.59	262.05	242.268	221.67	242.269
242.969	140.39	176.32	242.969	180.06	203.73	153.63	242.969	241.89	208.74	242.969	214.98	215.2	201.51	242.97	203.51	205.29	242.968	241.29	246.56	239.81	242.968	202.28	207.75	242.969	197.46	202.06	242.97	175.29	242.969	181.04	190.94	191.37	243.67	195.33	218.01	222.88	242.968	178.64	169.52	189.23	242.968	209.12	174.29	242.967	203.69	261.88	242.968	221.66	242.969
243.668	140.57	175.48	243.67	180.97	204.2	154.17	243.667	241.09	207.55	243.669	214.56	215.49	201.81	243.668	203.11	205.31	243.668	241.32	254.84	248	243.668	202.08	207.62	243.669	196.05	201.53	243.67	177.31	243.669	180.76	190.82	191.89	244.364	195.72	219.06	223.76	243.669	178.27	169.68	189.84	243.669	208.58	174.42	243.668	204.69	261.67	243.67	221.27	243.67
244.364	140.55	173.63	244.369	181.05	203.72	154.3	244.369	241.85	207.12	244.366	214.21	215.11	201.33	244.368	202.75	205.62	244.367	240.27	258.12	244.43	244.368	202.25	207.63	244.369	196.99	202.65	244.37	178.45	244.369	180.84	190.99	193.9	245.068	196.13	218.98	225.64	244.368	178.41	170.14	193.54	244.365	209.24	174.61	244.37	204.53	259.66	244.368	221.45	244.364
245.068	140.47	173.23	245.07	180.21	204.33	154.87	245.069	242.97	206.99	245.07	214.41	215.24	201.7	245.068	202.9	205.57	245.067	241.03	255.7	242.22	245.069	202.54	207.53	245.069	197.1	203	245.07	179.03	245.068	180.35	191.08	193.82	245.768	196.6	218.74	226.31	245.069	178.59	169.64	194.31	245.069	208.85	174.6	245.069	204.4	255.41	245.069	221.01	245.068
245.77	140.29	173.02	245.768	179.08	204.02	155.2	245.768	242.65	206.51	245.77	214.33	215.15	201.69	245.768	202.44	205.17	245.768	240.14	252.56	237	245.769	202.22	207.72	245.769	198.68	203.3	245.77	179.51	245.768	180.59	191	194.22	246.469	197.01	218.42	225.79	245.767	178.61	169.53	194.27	245.767	208.89	174.59	245.768	204.17	251.71	245.769	214.67	245.768
246.468	140.67	173.26	246.468	178.47	203.27	154.91	246.47	255.82	206.16	246.47	213.48	215.12	202.04	246.468	202.3	205.01	246.468	240.07	252.26	234.49	246.469	202.19	208.14	246.47	199.31	203.19	246.47	179.62	246.469	180.59	191.11	194.27	247.169	197.66	218.03	225.65	246.467	178.44	169.82	192.04	246.469	209.25	174.46	246.469	204.47	253.12	246.47	207.66	246.469
247.169	140.45	173.47	247.17	178.57	204.4	154.91	247.168	258.96	212.45	247.17	213.44	215.06	201.56	247.169	202.2	205.01	247.17	240.07	258.66	234.87	247.168	202.19	207.81	247.169	199.57	202.81	247.169	179.55	247.169	180.16	190.95	194.09	247.864	197.91	218.54	225.64	247.167	178.76	170.13	190.93	247.168	209.02	174.55	247.169	204.8	254.6	247.169	207.98	247.169
247.865	140.4	173.61	247.869	178.38	204.54	155.55	247.868	254.56	212.65	247.87	212.66	214.15	201.24	247.869	202.49	205.05	247.868	239.51	261.2	233.47	247.869	201.86	207.4	247.868	199.08	203.23	247.869	179.65	247.868	177.99	191	192.21	248.568	198.34	218.6	225.37	247.867	178.67	169.65	190.03	247.865	209.12	174.8	247.869	204.29	256.81	247.869	212.51	247.868
248.569	140.29	173.54	248.567	178.56	203.76	155.76	248.566	256.58	206.51	248.57	212.13	212.59	201.25	248.569	202.37	205.09	248.569	238.59	256.57	232.71	248.568	202.37	207.83	248.568	198.64	202.6	248.57	179.62	248.568	177.53	191.21	191.85	249.268	198.59	218.59	224.98	248.568	178.9	169.94	190.46	248.568	209.33	174.69	248.569	204.78	257.86	248.569	217.51	248.568
249.269	140.45	173.37	249.268	178.39	204.89	155.29	249.268	249.08	205.98	249.27	211.85	211.62	200.79	249.267	201.91	204.99	249.27	239.23	254.06	230.64	249.269	202.3	207.87	249.268	198.56	202.35	249.268	179.26	249.268	177.57	190.31	190.83	249.97	198.62	218.67	224.35	249.268	178.65	170.07	189.52	249.267	208.86	174.53	249.269	204.7	258.58	249.269	219.35	249.27
249.968	140.67	173.58	249.968	178	203.99	156.01	249.967	250.4	206.33	249.97	212.08	211.65	200.98	249.969	201.59	204.91	249.969	239.01	253.77	232.17	249.968	202.21	208.11	249.968	198.11	202.96	249.97	179.03	249.968	179.18	189.34	192.96	250.668	198.32	218.66	224.73	249.969	179.02	168.3	190.09	249.967	208.3	174.37	249.969	204.27	259.62	249.968	220.29	249.97
250.668	140.61	173.46	250.668	177.66	204.03	156.05	250.668	246.2	206.48	250.669	211.77	215.62	200.95	250.67	217.56	204.83	250.67	239.01	254.02	232.73	250.669	201.67	208.05	250.669	198.18	202.6	250.668	179.15	250.668	180.43	188.43	193.43	251.364	198.95	218.94	224.2	250.668	176.41	167.59	190.05	250.667	208.04	174.65	250.668	204.48	259.64	250.67	221	250.862
251.364	140.37	179.13	251.368	177.78	204.52	155.4	251.367	245.45	206.45	251.366	210.85	216.13	200.07	251.369	216.99	204.92	251.365	243.55	253.12	232.81	251.369	201.99	208.06	251.369	195.5	203	251.37	178.88	251.37	180.92	188.64	193.8	252.069	198.71	218.71	224.02	251.368	171.01	166.21	189.82	251.363	208.27	174.48	251.368	204.58	259.87	251.363	221.1	251.479
252.069	139.59	181.1	252.068	177.62	204.68	155.17	252.067	243.89	205.89	252.07	211.22	217.21	199.53	252.068	213.02	204.81	252.068	249.05	251.65	233.34	252.068	201.82	208.16	252.069	197.11	202.34	252.068	178.68	252.069	181.09	189.57	193.92	252.77	198.91	219.03	223.53	252.067	170.31	168.64	189.96	252.067	208.51	174.89	252.068	204.52	259.93	252.069	221.18	252.099
252.768	136.86	181.56	252.768	177.71	204.04	155.75	252.768	243.38	206.17	252.768	210.92	216.49	199.37	252.769	210.8	205.18	252.767	249.7	251.68	233.56	252.769	202.23	208.49	252.769	198.12	202.71	252.769	176.81	252.77	180.84	190.21	193.68	253.469	198.91	218.55	223.29	252.767	173.56	169.51	190.12	252.768	207.68	174.68	252.768	203.77	259.89	252.768	221.01	252.768
253.466	136.46	181.8	253.468	177.09	204.16	155.51	253.468	243.74	206.01	253.468	211.15	216.01	199.71	253.469	211.44	205.09	253.469	245.86	250.62	233.42	253.469	202.29	208.21	253.47	199.37	202.66	253.468	174.59	253.469	181.07	190.89	193.93	254.169	198.87	218.76	223.5	253.468	175.34	169.17	189.87	253.468	208.06	174.49	253.468	203.31	260.04	253.469	220.87	253.469
254.169	136.46	181.04	254.169	176.64	204.6	155.63	254.168	243.11	205.57	254.167	211.34	215.85	199.86	254.169	210.15	205.01	254.167	244.72	250.13	232.85	254.168	202.21	208.48	254.17	200.06	203.36	254.17	174.27	254.167	180.85	190.39	192.72	254.865	198.74	218.74	223.62	254.168	175.83	169.78	189.42	254.168	207.64	174.78	254.17	203.14	260.43	254.169	221.24	254.169
254.864	136.95	178.16	254.868	176.66	204.56	155.52	254.868	243.98	206.09	254.868	210.97	215.55	199.8	254.867	208.45	205.26	254.863	244.43	249.27	233.26	254.87	201.98	208.23	254.871	199.41	203.47	254.868	175.29	254.867	180.95	190.36	192.17	255.568	198.59	218.94	223.38	254.868	176.28	169.8	190.3	254.864	207.91	174.86	254.87	203.56	260.55	254.869	214.82	254.87
255.57	137.54	177.3	255.568	176.37	204.38	155.71	255.569	242.65	205.5	255.568	210.78	215.2	200.05	255.569	207.57	205.15	255.567	242.47	250.16	233.27	255.569	201.83	208.25	255.569	198.95	203.3	255.57	176.46	255.569	180.85	190.18	191.89	256.27	198.72	218.97	223.23	255.568	176.46	170.1	189.82	255.568	207.11	174.88	255.571	203.92	260.44	255.569	208.91	255.568
256.268	137.74	176.25	256.27	176.71	204.88	155.56	256.269	258.4	205.57	256.268	211.01	215.17	199.92	256.268	207.05	205.22	256.27	241.92	249.12	233.18	256.268	201.95	208.24	256.268	198.17	204.03	256.269	177.76	256.267	178.98	190.69	191.97	256.969	198.59	218.63	223.45	256.268	177.29	169.63	190.29	256.268	207.13	169.92	256.269	203.56	260.13	256.268	210.4	256.268
256.968	138.89	174.99	256.968	176.56	204.56	155.82	256.968	255.54	205.42	256.968	210.32	214.91	199.82	256.969	206.26	205.46	256.968	241.8	248.5	233.19	256.968	201.99	207.91	256.968	197.92	203.46	256.969	178.85	256.968	178.6	190.97	193.63	257.669	198.7	218.51	223.42	256.969	177.22	169.46	190.45	256.968	208.03	168.63	256.968	203.81	260.55	256.968	216.07	256.97
257.668	139.57	174.68	257.67	176.38	204.42	155.66	257.668	251.08	206.06	257.668	211.08	214.69	199.78	257.668	205.88	205.45	257.669	241.69	248.73	232.82	257.669	201.99	209	257.667	197.93	203.82	257.669	179.28	257.668	177.32	190.65	194.01	258.364	198.13	218.12	223.45	257.669	177.5	169.64	190	257.668	207.6	168.13	257.668	203.55	260.66	257.668	218.88	257.67
258.364	139.66	174.08	258.369	175.57	204.56	155.66	258.368	247.86	205.58	258.368	210.42	214.27	199.83	258.368	204.8	205.39	258.369	240.6	248.06	232.32	258.369	201.99	208.57	258.369	197.74	204.01	258.369	179.84	258.367	178.28	190.32	193.92	259.069	198.38	218.41	223.28	258.368	177.77	169.31	190.29	258.365	206.94	169.59	258.37	203.37	260.66	258.363	219.55	258.37
259.067	140.01	173.5	259.069	175.69	204.66	155.71	259.069	244.82	205.07	259.07	210.38	214.3	199.56	259.068	204.53	205.43	259.068	240.7	248.31	233.55	259.07	202.49	208.62	259.068	195.61	204.46	259.07	180	259.068	179.35	190.5	194.34	259.769	198.25	218.14	223.44	259.066	177.86	169.4	190.18	259.069	206.69	170.08	259.068	203.61	261.48	259.064	220.21	259.069
259.767	139.93	173.48	259.768	175.28	204.53	155.66	259.769	244.26	205.8	259.768	210.6	214.62	199.6	259.768	204.31	205.34	259.768	240.42	248.22	233.5	259.769	202	208.47	259.768	196.83	203.7	259.769	180.11	259.768	179.56	189.93	194.32	260.469	198.29	218.26	223.33	259.766	177.62	169.24	189.57	259.769	206.7	170.72	259.769	203.14	260.99	259.769	220.83	259.77
260.468	140.08	172.94	260.469	175.68	204.09	155.84	260.468	242.79	204.97	260.468	211.33	214.15	199.58	260.47	204.13	205.66	260.47	240	248.08	239.93	260.47	201.62	208.52	260.467	197.52	204.71	260.469	179.76	260.468	180.3	189.46	194.01	261.169	198.35	218.25	223.37	260.466	177.67	169.14	189.07	260.469	206.92	171.82	260.469	203.47	261.29	260.47	221.1	260.471
261.169	140.11	173.4	261.17	175.64	204.99	155.76	261.168	242.83	205.35	261.168	210.47	214.33	199.46	261.169	203.55	205.55	261.169	240.33	247.32	248.63	261.171	201.65	208.13	261.169	198.87	204.36	261.169	179.87	261.168	180.53	189.27	193.93	261.865	198.18	218.11	223.65	261.166	177.61	169.36	188.5	261.169	205.79	172.71	261.168	203.03	259.74	261.169	221.2	261.17
261.864	140.66	173.34	261.864	175.88	205.14	155.67	261.869	242.37	205.41	261.869	210.62	214.53	199.63	261.869	203.22	205.15	261.868	239.96	247.82	246.53	261.869	201.8	208.39	261.867	198.9	204.31	261.869	179.48	261.868	180.56	189.55	193.91	262.568	198.33	218.45	223.26	261.866	177.97	169.53	193.68	261.863	206.83	173.57	261.87	202.84	253.95	261.87	220.9	261.869
262.569	140.4	173.48	262.569	175.34	203.43	155.72	262.57	242.12	205.42	262.568	210.81	214.11	199.52	262.569	202.82	205.35	262.568	239.92	247.2	238.32	262.569	201.88	208.21	262.567	199.02	203.64	262.57	179.28	262.567	179.62	189.6	194.03	263.27	198.27	218.39	223.11	262.568	177.57	169.31	195.97	262.567	212.05	173.78	262.567	202.81	249.75	262.569	220.62	262.568
263.269	140.36	173.11	263.267	175.36	199.91	156.07	263.269	242.63	205.92	263.268	210.56	214.09	199.49	263.267	202.24	205.38	263.269	240.12	247.78	231.8	263.268	201.93	208.93	263.27	198.67	204.32	263.27	179.32	263.267	178.42	189.87	193.71	263.969	198.13	218.05	223.02	263.267	175.78	169.76	194.65	263.268	215.73	174.13	263.269	202.91	250.01	263.27	221.06	263.271
263.967	140.79	173.08	263.969	175.2	197.74	155.73	263.97	240.81	205.81	263.968	210.02	214.3	199.27	263.967	202.45	205.58	263.969	239.86	247.42	229.46	263.964	201.95	208.65	263.964	197.96	206.19	263.969	179.29	263.968	177.42	190.14	194.09	264.671	198.38	218.36	222.8	263.966	173.49	169.63	192.36	263.968	215.47	174.38	263.967	202.76	250.25	263.969	221.13	263.969
264.67	140.94	173.47	264.669	175.52	198.59	155.73	264.668	241.64	205.85	264.668	210.26	213.63	199.27	264.668	202.63	205.25	264.669	240.09	247	230.51	264.668	201.78	208.74	264.67	197.97	207.85	264.669	178.54	264.668	177.61	189.93	193.94	265.365	198.26	218.21	222.98	264.666	174.5	169.92	190.19	264.668	210.98	174.59	264.67	202.84	252.45	264.669	220.71	264.67
265.365	140.22	173.22	265.37	174.9	199.32	156.19	265.371	241.8	206.05	265.364	210.16	210.77	199.68	265.363	202.52	205.37	265.365	238.8	247.12	231.05	265.37	201.87	208.8	265.368	197.89	210.89	265.37	176.91	265.369	178.6	189.89	193.83	266.067	198.56	218.57	223.02	265.367	175.91	169.55	190.84	265.363	207.99	174.87	265.368	203.01	254.08	265.365	220.57	265.369
266.069	136.6	177.48	266.069	174.97	201.65	156.28	266.068	241.52	217.77	266.068	210.83	208.54	201.37	266.068	202.94	205.02	266.069	239.14	246.67	232.78	266.069	201.92	208.4	266.068	197.64	204	266.07	174.57	266.069	179.73	190.13	192.75	266.767	198.59	218.61	222.8	266.066	176.11	167.52	190.28	266.068	208.43	174.85	266.069	202.4	255.84	266.069	221.11	266.07
266.769	137.08	182	266.769	175.35	203.45	155.34	266.77	242.32	220.81	266.769	210.62	210.19	211.31	266.768	202.32	205.12	266.769	239.31	246.91	232.24	266.769	202.05	208.32	266.768	195.72	202.28	266.768	175.13	266.769	180.12	190.14	193.4	267.468	198.26	218.22	222.8	266.767	176.99	166.15	189.55	266.769	207.73	174.97	266.768	202.9	256.55	266.769	220.96	266.769
267.469	137.07	182.49	267.469	174.45	203.65	155.84	267.469	240.51	218.1	267.469	210.23	215.35	210.43	267.469	201.84	205.18	267.469	248.48	246.45	231.99	267.465	202.25	208.33	267.47	197.61	201.15	267.47	175.55	267.469	180.05	190.76	191.12	268.169	197.16	217.57	222.43	267.467	177.19	167.46	189.6	267.463	207.91	175.05	267.47	202.66	256.34	267.468	221.09	267.469
268.171	137.67	182.1	268.169	175.36	203.87	155.83	268.169	242.27	217.06	268.169	210.38	216.4	207.42	268.168	202.25	205.2	268.168	246.92	245.72	231.43	268.168	202.45	208.13	268.169	197.37	201.19	268.17	177.16	268.169	180.82	190.77	190.55	268.864	196.13	215.92	222.72	268.171	177.48	169.83	189.87	268.167	207.73	175.11	268.168	202.73	257.36	268.169	221.02	268.169
268.865	138.04	183.95	268.869	178.49	204.46	155.94	268.869	242.31	216.04	268.869	210.66	215.75	201.33	268.869	202.58	205.35	268.869	246.26	245.99	230.75	268.869	202.99	208.3	268.869	198.82	201.14	268.87	178.4	268.868	180.91	190.65	192.03	269.569	194.32	214.52	222.52	268.867	177.79	170.34	190.06	268.863	207.61	174.9	268.868	202.78	257.8	268.87	221.02	268.87
269.57	139.47	179.77	269.568	179.66	205.24	154.78	269.569	242.07	213.66	269.569	210.72	216.08	198.86	269.569	202.67	205.41	269.568	242.62	252.49	231.08	269.568	202.13	208.45	269.568	199.55	201.01	269.569	179.36	269.569	181.06	191.03	192.58	270.269	194.44	214.88	222.52	269.567	177.86	170.45	190.3	269.567	207.82	174.46	269.568	202.67	258.03	269.57	220.56	269.568
270.27	140.16	177.16	270.268	180.49	205.61	155.5	270.269	242.41	210.74	270.268	210.47	215.88	198.77	270.269	202.4	205.12	270.268	242.72	259.2	230.63	270.269	202.24	208.64	270.268	199.11	202	270.267	180.01	270.27	179.7	190.92	192.76	270.969	194.85	216.14	223.3	270.267	177.92	170.31	189.9	270.268	207.95	174.73	270.268	202.85	257.9	270.269	220.51	270.27
270.969	139.92	175.15	270.968	180.95	204.81	155.69	270.97	249.14	210.36	270.969	210.43	215.62	200	270.969	202.68	204.99	270.968	242.63	255.16	231.89	270.968	202.24	208.48	270.97	198.56	202.61	270.969	180.15	270.968	178.82	191.21	193.21	271.668	194.5	216.91	222.12	270.968	178.03	169.98	190.19	270.968	208.15	174.48	270.968	203.1	257.82	270.969	220.2	270.969
271.67	139.6	173.71	271.67	181.21	204.94	155.34	271.67	258.09	211.37	271.67	210.54	215.44	200.05	271.67	202.68	205.07	271.668	242.1	254.28	231.99	271.669	202.52	208.58	271.668	198.05	202.22	271.669	180.24	271.668	178.43	190.72	193.22	272.364	195.96	217.71	222.44	271.668	178.07	170.13	190.38	271.669	207.21	174.54	271.667	203.23	257.9	271.669	210.14	271.669
272.366	139.93	173.62	272.37	179.66	204.83	155.62	272.369	256.38	210.06	272.37	210.87	215.32	200.34	272.37	202.72	204.48	272.37	241.78	251.66	244	272.37	202.72	208.66	272.369	197.9	201.74	272.369	179.92	272.368	178.19	190.55	193.14	273.068	195.93	218.21	222.11	272.367	176.56	169.4	190.71	272.363	207.4	174.33	272.369	203.36	258.59	272.363	207	272.369
273.068	140.26	173.57	273.069	179.87	205.45	155.11	273.068	251.16	210.9	273.069	210.59	215.52	200.64	273.071	202.69	204.57	273.069	240.99	252.02	252.15	273.07	202.3	208.42	273.069	197.97	202.82	273.069	180.06	273.069	178.9	188.91	192.99	273.77	196.17	218.36	222.08	273.067	173.4	166.81	190.18	273.067	207.89	174.23	273.068	203.4	255.63	273.067	208.38	273.069
273.77	140.66	173.81	273.769	178.42	205.03	155.22	273.768	250.84	210.98	273.769	210.28	215.31	201.03	273.769	202.93	203.68	273.77	240.43	250.34	248.13	273.768	202.58	208.3	273.77	198.34	202.53	273.769	180.09	273.768	180.69	189.12	193.14	274.469	196.75	218.35	222.12	273.767	175.12	169.32	190.84	273.768	207.56	174.2	273.768	203.12	252.4	273.768	212.42	273.769
274.47	140.51	173.8	274.469	178.74	204.96	155.87	274.468	248.44	211.04	274.467	210.23	215.19	201.37	274.469	202.8	199.89	274.468	240.28	251.46	238.12	274.466	202.48	208.56	274.469	198.07	206.33	274.468	179.79	274.467	180.31	189.83	193.12	275.17	197.14	218.72	222.33	274.469	176.22	170.61	190.33	274.468	207.75	174.29	274.47	202.99	252.78	274.468	217.29	274.469
275.168	140.81	173.89	275.169	179.17	204.82	155.72	275.168	244.56	211.23	275.169	210.32	214.71	201.68	275.168	203.06	199.34	275.169	240.31	255.73	238.36	275.17	202.78	207.94	275.168	195.62	203.45	275.168	179.68	275.167	179.93	189.43	193.72	275.864	197.38	218.43	222.16	275.167	176.75	170.57	190.47	275.169	207.54	174.52	275.168	201.44	253.4	275.17	218.25	275.169
275.865	140.83	173.47	275.869	178.59	204.6	155.72	275.87	243.54	210.2	275.867	210.51	214.53	201.41	275.864	203.16	200.66	275.867	240.7	255.44	235.07	275.87	202.49	209.65	275.87	197.15	202.24	275.869	179.84	275.868	180.22	190.27	193.25	276.568	197.57	218.49	222.42	275.869	176.98	171.01	190.1	275.864	206.03	174.28	275.868	196.51	254.57	275.864	218.54	275.87
276.568	140.72	173.23	276.57	177.97	204.88	155.65	276.568	241.81	209.62	276.567	210.28	214.63	201.32	276.568	203.33	203.53	276.569	240.11	252.65	234.18	276.568	202.3	200.73	276.571	196.11	202.95	276.569	177.61	276.566	181.46	190.29	193.32	277.268	197.53	218.13	221.92	276.569	177.43	170.86	190.27	276.569	206.72	174.45	276.568	195.56	256.57	276.569	218.69	276.569
277.269	140.65	173.31	277.269	177.39	204.78	155.85	277.27	242.78	209.56	277.268	210.67	214.11	201.4	277.268	203.44	203.91	277.267	245	253.01	235.68	277.269	202.58	195.07	277.269	198.69	202.48	277.268	176.65	277.269	180.37	189.96	193.34	277.97	197.52	218.39	221.74	277.267	177.69	170.07	190.62	277.269	206.5	174.52	277.269	195.44	257.47	277.269	218.68	277.27
277.969	140.83	173.16	277.969	177.57	200.66	156	277.969	243.35	207.98	277.968	210.69	213.95	201.4	277.97	203.3	203.73	277.967	247.13	252.04	234.66	277.969	203.46	197.81	277.969	199.25	201.91	277.968	174.89	277.967	179.1	190.22	193.86	278.67	197.54	218.4	221.54	277.97	177.81	170.27	190.84	277.969	206.68	174.26	277.969	197.3	257.61	277.969	218.69	277.971
278.669	141.19	173.48	278.669	176.7	198.83	156.29	278.669	242.19	208.77	278.667	210.47	214.06	201.36	278.67	203.5	203.8	278.668	245.73	251.01	233.29	278.671	201.43	199.93	278.669	199.01	202.43	278.668	174.81	278.667	178.27	190.21	192.3	279.365	197.57	218.34	221.56	278.668	177.83	170.4	191.89	278.669	206.74	174.36	278.669	200.89	258.03	278.669	218.76	278.669
279.365	141.09	173.16	279.369	176.95	202.25	156.02	279.369	243.44	208.98	279.367	210.38	213.88	201.52	279.369	203.44	204.03	279.363	242.6	250.76	232.01	279.371	201.82	201.15	279.368	198.67	202.67	279.368	175.66	279.369	178.61	189.82	191.71	280.069	197.67	218.24	221.87	279.368	178.13	170.21	195.13	279.363	206.43	174.67	279.37	201.18	258.65	279.365	218.93	279.369
280.07	140.98	173.48	280.071	176.74	202.64	156.11	280.068	243.35	208.57	280.069	210.88	214.39	201.56	280.07	203.38	204.49	280.068	241.64	250.48	231.77	280.07	202.44	202.1	280.067	198.59	203.26	280.068	176.43	280.067	179.32	189.2	191.31	280.768	197.74	218.25	221.82	280.069	178.04	170.1	194.46	280.067	206.29	174.66	280.069	201.78	258.54	280.069	218.86	280.07
280.768	140.9	173.24	280.768	176.19	202.71	154.94	280.77	242.63	207.96	280.768	210.72	214.21	202.33	280.768	203.59	204.59	280.767	241.51	249.09	232.45	280.768	202.44	203.03	280.769	198.31	203.23	280.768	177.69	280.769	180.13	189.88	190.69	281.47	197.98	218.16	221.76	280.769	178.24	169.78	191.68	280.768	205.84	174.6	280.769	202.25	258.38	280.769	218.97	280.769
281.469	140.86	179.15	281.47	176.26	203.01	154.14	281.469	241.87	216.76	281.468	210.5	214.06	209.02	281.468	203.48	204.78	281.469	239.9	248.87	230.97	281.469	202.46	203.43	281.468	198.08	204.03	281.47	178.42	281.47	180.09	189.77	190.87	282.17	197.82	217.99	221.73	281.467	178.11	170.07	191.08	281.468	206.58	174.58	281.471	202.46	258.72	281.469	219.2	281.47
282.168	140.66	181.52	282.169	176.48	204.54	154.28	282.17	251.52	220.23	282.168	210.12	214.21	207.15	282.168	203.65	205.18	282.167	240.75	249.06	231.29	282.17	202.69	203.4	282.169	197.76	203.35	282.168	178.97	282.17	179.82	189.74	192.28	282.866	198.05	217.91	221.65	282.167	178.23	169.89	190.92	282.169	206.21	174.34	282.17	202.28	258.37	282.167	220.03	282.171
282.864	140.59	181.54	282.869	176.05	204.94	154.72	282.869	262.96	216.56	282.864	210.37	214.88	202.2	282.868	203.68	204.99	282.865	240.69	249.11	231.17	282.868	202.86	203.78	282.868	196.69	204.04	282.87	179.51	282.868	180.56	189.98	192.88	283.568	198.23	217.62	221.85	282.868	178.41	170.02	190.29	282.864	206.31	174.59	282.868	202.67	258.17	282.864	219.59	282.871
283.568	140.43	180.43	283.569	176.3	206.02	154.75	283.569	256.58	214.19	283.568	210.21	214.7	199.3	283.569	203.28	204.96	283.567	240.53	248.36	231.5	283.57	203.09	205.68	283.569	197.35	203.64	283.568	180.08	283.568	180.9	190.81	193.11	284.27	198.07	218.22	226.03	283.567	178.49	170.06	189.49	283.567	206.22	174.74	283.569	202.96	258.85	283.567	219.97	283.569
284.268	140.18	180.36	284.269	175.52	205.82	154.69	284.27	255.58	214.8	284.268	210.28	214.29	199.77	284.267	203.13	205.14	284.268	240.01	248.34	244.86	284.27	203.02	205.76	284.268	197.47	203.97	284.268	179.9	284.268	181.33	190.73	193.11	284.969	198.06	217.98	225.5	284.267	178.24	169.9	189.25	284.267	212.31	174.75	284.267	203.4	259.06	284.268	220.05	284.269
284.968	140.28	177.9	284.969	175.87	204.92	154.88	284.97	253.01	211.84	284.969	210.22	214.56	199.93	284.968	203.16	205.35	284.968	240.23	248.35	250.15	284.968	202.87	206.73	284.968	199.39	203.95	284.968	179.77	284.969	181.52	190.5	193.61	285.669	198.06	218.07	226.45	284.968	178.29	168.54	190.23	284.968	215.24	174.98	284.967	203.39	258.96	284.969	219.81	284.97
285.668	140.56	177.14	285.669	180.11	205.68	155.91	285.67	250.63	210.46	285.671	210.31	214.35	200.14	285.668	203.23	204.87	285.668	241.4	248.63	243.95	285.668	203.12	206.15	285.669	200.1	204.05	285.67	178.06	285.669	180.07	191.04	193.13	286.368	198.27	218.13	225.99	285.668	178.48	166.6	189.58	285.668	213.49	175.01	285.669	203.27	258.82	285.668	219.89	285.67
286.365	140.38	176.17	286.37	181.13	205.2	156.09	286.37	252.3	209.94	286.368	210.45	214.24	200.97	286.367	203.12	205.24	286.368	240.71	247.6	232.07	286.37	203.06	206.43	286.37	199.21	203.93	286.369	176.49	286.368	179.12	190.85	193.24	287.068	198.29	218.73	225.07	286.367	178.55	166.18	190.46	286.363	211.93	174.61	286.369	203.01	258.93	286.364	219.63	286.368
287.069	140.5	175.4	287.07	181.68	204.87	156.11	287.069	251.41	209.85	287.069	210.29	214.3	200.93	287.069	203.19	205.47	287.068	241.62	247.17	231.75	287.069	202.6	206.12	287.07	199.18	204.05	287.069	175.94	287.068	178.18	191.24	193.52	287.768	198.35	218.59	224.69	287.068	178.31	168.68	190.34	287.068	207.93	175.02	287.067	203	258.89	287.07	219.85	287.068
287.769	140.65	174.51	287.769	181.01	205.28	156.28	287.769	250.1	209.56	287.768	210.79	214.44	201.18	287.768	203.18	205.32	287.768	240.27	253.88	233.24	287.768	202.54	206.32	287.77	198.67	204.11	287.769	176.23	287.768	176.57	190.51	192.96	288.468	198.33	218.1	224.72	287.767	178.34	170.33	190.62	287.768	208.76	174.91	287.767	203.07	259.27	287.768	219.55	287.768
288.469	140.79	174.19	288.47	181.95	204.67	155.6	288.47	247.78	209.21	288.469	210.97	214.6	201.49	288.47	203.5	205.53	288.468	240.41	260.19	232.13	288.469	203.12	206.37	288.47	198.21	204.49	288.468	177.26	288.468	178.22	190.01	193.16	289.168	198.64	218.27	224.72	288.468	178.31	170.04	190.35	288.468	208.1	174.91	288.467	203.01	258.95	288.469	219.8	288.47
289.17	141.3	173.83	289.17	181.14	205.05	155.96	289.169	243.53	208.51	289.168	211	214.71	201.7	289.169	202.96	205.74	289.169	241.29	255.47	233.09	289.169	202.57	206.75	289.168	198.95	204.06	289.169	178.74	289.168	179.28	189.83	192.71	289.865	198.33	218.32	224.47	289.168	178.47	170.06	190.96	289.168	208.69	175.17	289.168	203.42	259.04	289.169	219.92	289.17
289.864	141.12	174.01	289.868	178.59	205.26	155.87	289.869	243.29	209.42	289.87	210.41	214.27	201.48	289.869	203.53	203.6	289.864	248.48	252.01	233.19	289.869	202.94	206.66	289.869	197.97	203.76	289.869	178.96	289.87	179.38	189.73	192.89	290.567	198.6	218.12	224.33	289.868	178.48	170.16	190.91	289.863	208.45	170.67	289.867	203.2	253.1	289.864	219.84	289.869
290.569	140.83	173.21	290.569	178.38	204.68	155.94	290.568	242.56	210.59	290.57	210.47	214.32	201.83	290.57	203.54	200.54	290.569	246.83	252.12	232.24	290.569	202.43	207.62	290.568	196.84	204.38	290.568	179.56	290.569	179.56	189.09	192.95	291.271	198.73	218.15	223.93	290.568	178.58	170.06	191.01	290.569	209.06	168.61	290.567	202.99	248.41	290.569	219.64	290.569
291.268	141.32	173.15	291.268	178.76	204.93	156.17	291.264	243.01	210.16	291.27	210.29	214.54	202.07	291.268	215.94	200.57	291.268	245.98	251.12	231.35	291.268	202.74	207.83	291.269	197.53	204.45	291.269	179.63	291.268	179.94	189.75	193.01	291.969	198.65	218.65	223.44	291.268	178.45	169.83	190.68	291.269	208.45	167.04	291.268	202.91	246.06	291.269	219.34	291.268
291.969	140.6	172.75	291.968	178.85	204.85	155.82	291.968	243.03	208.93	291.97	210.59	214.55	201.79	291.969	214.06	203.89	291.97	240.88	250.39	231.46	291.969	202.58	207.23	291.97	199.17	203.76	291.969	180.03	291.969	180.82	190.16	192.83	292.668	198.45	217.89	223.09	291.968	178.24	169.3	191.09	291.968	208.14	167.99	291.97	201.82	248.96	291.969	219.62	291.97
292.669	140.63	172.94	292.669	178.96	204.61	156.01	292.667	243.23	209.68	292.669	210.45	214.06	201.25	292.669	211.46	205.73	292.67	243.17	249.89	230.88	292.669	202.7	208.11	292.67	199.46	203.62	292.67	179.8	292.668	180.92	189.85	193.27	293.365	197.45	218.05	223.44	292.668	178.52	168.16	190.77	292.669	208.23	169.43	292.669	198.32	250.9	292.669	219.47	292.67
293.365	140.64	173.15	293.37	178.26	203.85	156.09	293.364	243.04	209.19	293.37	210.23	214.33	201.59	293.363	211.46	203.96	293.37	242.78	250.08	230.87	293.37	202.79	208.13	293.368	199.67	203.45	293.369	179.82	293.368	181.62	190.4	193.34	294.068	196.81	217.85	222.92	293.368	175.61	165.79	190.52	293.363	208.15	170.08	293.367	196.31	252.21	293.363	219.76	293.37
294.068	140.35	172.83	294.07	177.91	204.21	154.91	294.069	242.85	208.88	294.069	210.23	214.55	202.19	294.069	209.87	203.71	294.068	241.8	249.34	231.1	294.07	202.77	207.76	294.069	199.6	204.08	294.07	180.03	294.068	181.41	190.91	193.19	294.768	194.94	218.27	222.29	294.068	170.67	168.97	190.77	294.069	207.82	170.73	294.068	196.36	254.01	294.068	220.05	294.068
294.77	140.86	173.16	294.768	177.81	204.39	155.03	294.764	241.57	208.38	294.77	210.06	213.85	201.43	294.769	210.36	203.77	294.768	241.9	249.37	232.07	294.768	202.48	208.22	294.768	199.16	204.43	294.769	179.88	294.768	180.12	190.95	193.4	295.469	194.23	218.21	222.64	294.768	171.79	169.61	190.21	294.768	208.48	171.61	294.769	198.69	255.23	294.768	219.96	294.768
295.47	139.09	172.98	295.468	177.47	204.1	155.97	295.47	241.68	207.93	295.468	210.22	213.88	204.77	295.468	208.22	203.78	295.468	241.24	248.69	231.91	295.469	202.57	208.3	295.47	198.84	206.21	295.469	179.81	295.469	179.07	191	193.5	296.17	194.19	217.72	222.83	295.469	175.22	169.41	189.87	295.468	207.38	171.94	295.468	199.99	255.33	295.467	220.09	295.47
296.171	137.06	172.98	296.17	177.36	204.19	155.49	296.164	241.99	207.52	296.17	209.67	210.02	210.11	296.169	207.04	204.26	296.167	240.5	252.53	231.16	296.17	202.35	207.96	296.169	198.42	207.05	296.17	179.88	296.167	177.83	191.1	193.34	296.867	194.59	218.08	222.71	296.167	176.37	170.05	190.23	296.169	214.23	172.39	296.168	201.07	255.37	296.168	219.88	296.169
296.865	138.44	172.82	296.869	177.24	203.46	155.64	296.868	242.02	206.99	296.87	209.68	208.18	208.43	296.869	207.31	204.47	296.868	241.3	256.2	232.47	296.869	202.22	207.99	296.87	198.62	208.83	296.87	177.13	296.868	178.21	190.96	193.24	297.569	195.34	217.85	222.21	296.87	176.5	170.31	189.89	296.865	216.33	172.65	296.868	202.02	255.43	296.864	219.57	296.869
297.57	139.58	174.69	297.569	177.43	202	155.98	297.568	241.58	214.16	297.57	209.48	211.48	202.16	297.569	206.27	205.15	297.568	240.67	253.71	231.88	297.569	202.9	207.83	297.57	197.1	202.71	297.569	174.61	297.568	179.46	191.1	193.51	298.269	195.41	217.81	222.33	297.569	176.79	169.67	189.92	297.568	214.94	172.79	297.568	201.8	255.87	297.568	219.7	297.568
298.269	139.17	182.43	298.27	180.26	198.91	155.31	298.268	258.64	220.15	298.27	209.85	215.76	199.33	298.269	205.21	205.28	298.268	240.47	251.48	231.48	298.268	202.68	207.91	298.268	195.37	201.69	298.269	173.59	298.27	179.58	191.37	193.68	298.969	195.79	218.15	222.72	298.268	177.28	169.46	190	298.269	210.91	172.95	298.27	201.73	256.25	298.268	219.7	298.269
298.968	139.57	183.85	298.969	181.78	201.11	155.09	298.967	256.4	220.01	298.968	209.9	215.77	200.05	298.969	204.44	205.43	298.97	240.21	251.34	244.3	298.969	202.57	207.89	298.964	196.92	200.91	298.969	175.54	298.968	179.67	190.32	193.37	299.671	196.67	218.29	222.36	298.968	177.57	169.27	190.19	298.968	208.03	173.23	298.969	201.38	256.98	298.968	219.78	298.969
299.668	139.73	181.65	299.669	182.13	202.63	155.46	299.667	251.13	217.32	299.669	209.78	215.83	200.86	299.668	204.16	205.23	299.668	240.11	253.18	248.15	299.669	202.56	207.84	299.668	198.79	201	299.669	176.05	299.668	179.92	189.52	193.9					299.669	177.73	169.48	190.1	299.67	208.7	173.61	299.669	201.72	257.68	299.668	219.52	299.669
[truncated: 1 more columns]

## Sheet: Day5-timelapse
Time [s]	#1 (TD)	Time [s]	#1 (TD)	#2 (TD)	Time [s]	#1 (TD)	#2 (TD)	#3 (TD)	Time [s]	#1 (TD)	Time [s]	#1 (TD)	#2 (TD)	Time [s]	#1 (TD)	Time [s]	#1 (TD)	#2 (TD)	Time [s]	#1 (TD)	#2 (TD)	Time [s]	#1 (TD)	#2 (TD)	Time [s]	#1 (TD)	#2 (TD)	Time [s]	#1 (TD)	#3 (TD)	Time [s]	#1 (TD)	#2 (TD)	#3 (TD)	Time [s]	#1 (TD)	#2 (TD)	Time [s]	#1 (TD)	#2 (TD)	#3 (TD)	Time [s]	#1 (TD)	#2 (TD)	Time [s]	#1 (TD)	#2 (TD)	#3 (TD)	Time [s]
0.064	1.44	0.063	281.83	260.26	0.066	308.88	270.88	242.94	0.065	275.11	0.064	349.7	309.86	0.064	270.21	0.064	378.25	332.25	0.064	309.8	341.16	0.064	358.9	331.51	0.064	350.57	349.03	0.066	249.72	231.87	0.064	250.13	231	226.69	0.064	189.24	215.47	0.065	201.09	247.02	165.5	0.066	195.17	227.12	0.066	174.23	201.2	177.61	0.065
0.766	2.06	0.767	281.25	259.16	0.768	306.68	265.51	243.52	0.768	275.23	0.768	349.18	308.69	0.769	268.17	0.768	379.03	331.49	0.767	311.16	340.69	0.768	358.23	332.04	0.767	349.71	349.68	0.77	249.08	230.77	0.768	251.16	231.83	226.16	0.768	189.69	215.9	0.769	200.84	246.68	163.71	0.769	195.21	227.06	0.768	173.83	199.35	178.25	0.767
1.462	0.97	1.463	281.87	258.5	1.465	305.19	267	240.29	1.465	274.6	1.464	350.42	308.78	1.465	267.55	1.464	378.4	331.48	1.463	309.06	341.81	1.465	358.17	331.77	1.463	338.1	349.16	1.465	248.71	231.8	1.464	250.87	230.12	226.4	1.464	189.39	215.02	1.465	200.81	246.73	164.11	1.465	194.86	227.13	1.462	174.64	200.22	177.54	1.464
2.168	1.05	2.166	281.85	258.35	2.168	304.8	265.08	247.24	2.169	274.57	2.167	350.06	309.68	2.168	265.73	2.168	378.24	330.81	2.168	309.19	343.33	2.168	358.18	331.84	2.166	338.25	349.71	2.168	256.18	231.5	2.169	251.14	229.21	226.35	2.168	189.33	214.72	2.169	200.58	246.84	163.63	2.168	194.91	227.14	2.167	175	201.96	178.08	2.168
2.868	0.85	2.867	281.8	257.24	2.868	306.43	265.36	253.63	2.867	274.32	2.868	349.44	308.98	2.867	264.53	2.868	377.58	331.03	2.866	309.33	344.49	2.868	358.54	331.44	2.867	341.98	350.59	2.868	259.46	231.06	2.869	251.52	230.89	226.39	2.867	189.32	213.21	2.869	200.75	247.1	163.56	2.87	195.05	227.34	2.867	175.59	202.91	178.36	2.867
3.567	0.8	3.565	280.87	257.25	3.565	307.42	265.28	253.27	3.568	272.78	3.569	349.86	309.23	3.568	264.69	3.568	377.14	331.38	3.568	309.47	344.42	3.568	358.16	331.51	3.568	348.1	350.18	3.568	250.93	239.9	3.567	251.02	229.64	227.04	3.566	189.6	214.68	3.569	202.64	239.74	163.88	3.569	194.93	226.87	3.569	176.04	203.62	178.16	3.566
4.268	15.14	4.266	280.73	257.99	4.269	307.67	265.79	247.91	4.268	276	4.268	350.53	309.49	4.268	264.98	4.269	377.28	329.18	4.267	311.35	344.57	4.267	358.5	332.32	4.268	348.38	351	4.269	249.53	239.73	4.267	248.36	231.93	226.7	4.269	189.22	213.55	4.27	203.83	228.96	164	4.269	195.25	227.48	4.267	176.52	204.31	178.03	4.268
4.967	22.25	4.968	280.71	259.37	4.969	308.27	266.04	245.08	4.968	278.17	4.969	350.66	309.19	4.968	264.95	4.969	377.38	346.81	4.967	312.51	344.44	4.968	358.11	331.75	4.968	348.78	351.15	4.97	250.61	230.34	4.969	245.86	231.93	227.04	4.968	188.99	214.92	4.969	200.86	230.69	163.72	4.97	195.02	227.14	4.968	176.49	204.69	178.82	4.968
5.668	15.31	5.668	282.15	258.35	5.669	308.38	265.84	242.84	5.668	279	5.668	349.53	309.41	5.668	263.82	5.668	376.94	345.9	5.668	311.88	345.34	5.668	357.78	331.39	5.668	350.48	351.47	5.669	249.27	229.17	5.668	244.92	230.93	226.8	5.67	189.74	213.74	5.668	201.48	239.37	163.76	5.667	195.11	227.52	5.668	177.39	204.61	178.85	5.668
6.368	9.78	6.368	281.57	257.75	6.367	308.8	265.07	242.93	6.367	276.35	6.364	348.63	309.51	6.368	264.81	6.368	377.65	341.25	6.368	312.35	344.91	6.369	358.47	331.23	6.368	349.51	351.13	6.37	248.66	229.26	6.368	246.81	229.95	218.15	6.368	188.9	214.65	6.368	201.53	240.8	163.62	6.367	195.46	227.07	6.369	177.03	204.53	178.59	6.368
7.068	5.26	7.066	281.93	257.55	7.068	307.94	265.35	243.6	7.068	275.29	7.068	347.95	309.87	7.067	264.13	7.068	376.47	338.23	7.067	313.93	344.91	7.07	358.08	331.26	7.068	350.21	351.37	7.069	248.91	229.76	7.067	249.38	228.96	217.61	7.069	189.21	214.33	7.068	200.74	241.11	164.25	7.067	195.62	226.46	7.069	177.49	205.02	178.63	7.067
7.768	4.74	7.766	281.2	256.73	7.768	307.97	266.36	243.66	7.768	273.57	7.768	350.17	310.3	7.768	264.72	7.768	375.69	334.04	7.767	310.81	345.37	7.768	358.14	331.14	7.768	349.96	351.13	7.768	248.29	230.63	7.768	248.63	230.56	219.92	7.768	189.66	214.38	7.77	200.31	241.71	164.38	7.769	198.54	226.72	7.768	177.74	205.05	178.93	7.768
8.468	2.98	8.467	281.62	257.07	8.469	307.34	273.61	243.53	8.468	274.14	8.469	348.9	310.44	8.467	264.16	8.47	362.98	331.91	8.467	308.8	344.72	8.469	358.83	331.4	8.468	350.42	350.65	8.468	248.52	231.01	8.467	248.87	229.5	223.31	8.468	189.32	215.04	8.47	200.18	241.67	164.8	8.468	198.41	227.23	8.469	178.05	205.32	178.38	8.467
9.168	2.35	9.168	280.88	257.21	9.169	308.68	277.42	243.1	9.168	274.95	9.169	349.42	310.71	9.169	263.28	9.168	368.38	331.36	9.167	307.17	343	9.169	357.91	331.23	9.169	351.25	351.41	9.169	247.78	230.52	9.168	248.68	229.55	224.07	9.168	189	213.49	9.169	200.18	242.47	164.74	9.168	197.19	227.05	9.168	176.49	205.43	178.47	9.168
9.867	1.66	9.866	281.12	256.3	9.865	309.44	270.9	243.31	9.868	274.81	9.87	348.96	310.13	9.867	263.47	9.867	374.94	332.47	9.866	308.58	343.14	9.869	357.31	331.96	9.867	350.69	351.31	9.869	248.43	230.23	9.868	249.11	228.93	225.2	9.869	189.19	215.03	9.868	200.06	242.94	164.46	9.867	196.96	227.22	9.868	176.14	205.68	178.62	9.868
10.566	2.71	10.568	280.56	257.56	10.569	309.62	269.22	243.8	10.568	275.11	10.569	349.43	310.58	10.567	263.23	10.566	375.69	331.26	10.568	309.61	343.74	10.569	357.73	331.62	10.567	351.06	351.67	10.567	247.88	230.49	10.567	249.55	228.93	224.93	10.567	189.07	213.48	10.569	200.25	243.17	164.37	10.568	196.6	227.06	10.567	175.3	205.83	178.9	10.569
11.266	2.3	11.266	280.7	257.06	11.266	309.67	266.94	243.07	11.267	274.45	11.27	350.55	310.97	11.267	263.09	11.267	375.42	332.05	11.267	310.54	344.72	11.269	357.57	331.59	11.269	351.59	351.31	11.267	248.02	230.37	11.269	250.13	229.38	225.62	11.269	189.19	213.06	11.268	200.1	243.42	164.36	11.268	196	227.38	11.27	175.19	205.77	178.63	11.269
11.967	2.01	11.968	281.09	259.93	11.969	310.35	266.09	243.27	11.968	275.39	11.968	349.12	310.29	11.968	263.65	11.968	374.81	330.65	11.967	312.23	345.29	11.97	358.39	331.24	11.966	351.91	351.51	11.968	256.76	229.88	11.968	249.1	230.18	226.32	11.968	190.87	213.88	11.969	200.31	243.49	164.24	11.968	195.68	226.99	11.969	175.49	205.66	178.53	11.968
12.667	1.65	12.668	283.17	276.2	12.668	310.86	267.11	242.53	12.669	275.37	12.67	349.82	310.23	12.669	263.1	12.669	374.47	330.97	12.668	310.97	345.61	12.668	357.8	330.93	12.668	350.65	351.22	12.668	258.39	229.08	12.667	248.73	230.68	225.87	12.669	195.34	214.29	12.669	199.92	243.82	164.04	12.668	195.62	227.3	12.669	175.29	205.35	178.61	12.667
13.369	1.48	13.368	282.76	282.59	13.365	310.87	266.68	243.38	13.369	275.47	13.368	350.15	310.63	13.367	263.28	13.369	375.01	331.16	13.366	310.6	345.38	13.369	357.81	330.79	13.369	351.45	351.45	13.367	251.19	229.28	13.367	248.27	230.94	226.49	13.368	195.25	214.18	13.369	200.06	244.1	165.71	13.369	195.18	227.38	13.368	176.09	200.58	178.72	13.369
14.066	1.48	14.069	282.53	280.66	14.068	310.96	270.13	242.99	14.067	276.01	14.069	350.12	310.48	14.068	263.14	14.068	375.15	330.98	14.068	308.65	345.01	14.069	358.08	330.49	14.066	351.67	351.61	14.067	247.41	229.51	14.067	249.15	229.42	225.83	14.069	193.93	227.45	14.068	199.89	244.49	165.78	14.069	195.35	227.25	14.069	176.4	199.33	177.39	14.068
14.768	1.1	14.768	281.16	280.72	14.764	310.33	273.08	244.8	14.767	275.96	14.769	350.03	310.69	14.767	262.95	14.767	374.55	331.21	14.767	307.95	345.24	14.769	358.22	330.75	14.767	351.76	351.91	14.768	249.49	229	14.767	249.62	230.82	225.98	14.769	193.4	237.67	14.769	200.23	244.57	166.03	14.767	194.94	227.17	14.768	176.76	199.74	175.11	14.767
15.467	1.11	15.468	281.33	272.33	15.464	309.25	269.74	247.47	15.468	276.2	15.47	349.16	310.86	15.469	262.8	15.47	375.17	331.68	15.467	307.89	345.59	15.469	358.3	331.06	15.468	351.83	351.79	15.468	248.67	229.52	15.467	249.85	230.2	226.13	15.469	191.56	235.52	15.469	203.64	244.86	163.42	15.468	195.02	227.76	15.47	177	201.72	175.15	15.467
16.168	1.1	16.168	280.22	267.43	16.168	308.82	267.09	247.18	16.168	276.59	16.17	349.57	311.23	16.169	263.58	16.169	375.67	332.17	16.169	307.79	345.38	16.169	358.33	331.08	16.168	351.81	351.07	16.168	247.88	229.01	16.167	249.17	229.86	226.91	16.169	190.17	229.76	16.17	200.74	245.23	162.6	16.169	194.82	234.02	16.17	177.28	202.81	176.32	16.168
16.868	0.48	16.868	281.95	268.76	16.868	309.97	265.19	245.83	16.867	275.86	16.868	349.81	310.6	16.87	263.74	16.868	375.68	331.05	16.869	307.51	345.05	16.869	358.37	330.58	16.868	352.08	351.35	16.867	248.3	229.3	16.868	248.22	229.99	221.05	16.868	189.84	222.27	16.868	201.12	244.9	163.09	16.869	194.95	237.66	16.87	177.44	203.74	176.42	16.866
17.568	0.11	17.568	280.45	267.34	17.569	310.03	266.04	245.37	17.568	275.65	17.568	350.52	311.04	17.568	262.75	17.568	374.28	331.97	17.568	307.31	345.34	17.57	357.91	331.27	17.567	352.1	351.45	17.568	248.59	229.4	17.567	247.83	229.52	220.87	17.568	189.11	222.24	17.568	201.62	245.12	163.25	17.567	195.05	236.24	17.57	176.99	204.29	176.9	17.568
18.268	1.08	18.268	280.54	265.79	18.269	310.51	266.24	244.27	18.267	275.29	18.268	350.64	310.57	18.267	263.26	18.269	362.18	331.09	18.268	307.1	346.11	18.267	358.7	331.59	18.268	352.63	351.42	18.268	248.23	229.57	18.267	248.85	229.84	220.48	18.267	188.66	217.8	18.268	200.87	245.08	163.15	18.269	195.02	231.69	18.27	176.4	204.48	177	18.266
18.968	0.76	18.968	280.01	264.46	18.97	310.17	266.39	243.46	18.967	274.96	18.969	350.45	310.92	18.966	263.85	18.969	361.51	330.51	18.968	307.4	345.31	18.969	357.48	331.27	18.968	352.68	351.56	18.968	248.39	230.11	18.967	249.11	230.1	223.58	18.968	188.5	216.82	18.969	200.59	245.47	163.52	18.967	195.06	228.7	18.969	176.74	204.96	177.41	18.968
19.668	1.02	19.669	281.22	262.77	19.67	310.3	266.59	243.6	19.669	274.66	19.669	350.04	310.06	19.668	263.23	19.669	368.82	330.66	19.668	307.9	344.99	19.669	357.97	331.21	19.669	351.37	351.36	19.669	254.92	229.61	19.667	249.53	230.47	224.5	19.668	188.59	217.01	19.669	200.48	245.62	163.52	19.669	194.98	227.65	19.671	176.68	205.09	177.45	19.668
20.37	0.87	20.37	282.9	263.01	20.368	311.01	266.21	243.41	20.367	274.81	20.368	351.11	310.07	20.368	263.54	20.368	373.35	330.81	20.366	308.4	344.82	20.369	358.68	329.97	20.369	352.51	351.69	20.367	249.63	229.81	20.367	248.67	231.49	224.27	20.368	187.96	216.94	20.369	200.23	245.57	163.4	20.368	195.01	227.94	20.37	177.15	204.69	177.47	20.368
21.068	0.08	21.068	283.43	262.07	21.068	310.42	265.56	242.38	21.068	274.89	21.068	350.53	310.07	21.066	262.54	21.068	373.86	331.17	21.066	335.66	344.69	21.067	358.72	330.33	21.069	352.44	352.09	21.069	247.12	229.92	21.067	247.65	232.12	224.79	21.069	188.18	217.43	21.068	200.35	237.16	163.54	21.069	195.1	227.56	21.07	177.5	200.88	177.65	21.068
21.769	0.32	21.768	282.68	262.95	21.768	309.4	266.39	242.53	21.768	275.04	21.767	350.26	310.7	21.767	263.18	21.769	374.49	331.79	21.767	345.79	344.46	21.768	357.88	329.71	21.768	352.38	342.89	21.769	247.42	230.23	21.767	247.65	234.82	224.9	21.767	188.83	217.01	21.769	200.3	229.09	163.59	21.768	195.18	227.77	21.768	177.3	199.97	177.89	21.767
22.469	0.94	22.468	282.57	262.75	22.469	310.94	265.87	242.28	22.468	274.7	22.467	350.26	313.63	22.467	263.58	22.468	374.26	331.64	22.467	352.22	344.69	22.469	357.3	329.79	22.468	352.1	339.97	22.468	247.61	230.06	22.468	248.45	251.61	225.09	22.467	188.55	216.14	22.469	200.09	233.21	166.3	22.468	195	227.76	22.47	177.79	201.54	178.07	22.468
23.168	0.49	23.168	281.78	261.11	23.17	310.3	265.84	242.77	23.167	274.85	23.168	350.28	314.13	23.168	263.84	23.169	373.62	330.96	23.167	343.69	343.76	23.167	357.34	330.24	23.169	351.58	346.27	23.169	248.15	230.14	23.169	248.81	249.97	225.03	23.168	188.58	217.04	23.169	200.09	239.15	165.6	23.168	194.82	227.73	23.169	177.55	203.09	178.19	23.169
23.868	0.49	23.868	281.67	261.48	23.869	309.25	268.76	242.87	23.867	274.41	23.868	350.89	312.72	23.866	264.56	23.869	374.78	330.56	23.868	327.45	342.57	23.868	357.44	330.48	23.869	351.84	347.54	23.869	247.71	230.36	23.867	249.21	245.26	221.09	23.868	188.23	217.17	23.869	200.27	240.72	165	23.868	194.61	227.76	23.867	177.92	203.37	178.1	23.868
24.566	0.61	24.567	280.51	260.99	24.569	308.51	276.19	242.05	24.566	274.39	24.569	352.18	310.75	24.569	262.45	24.569	375.09	330.19	24.567	322.31	343.26	24.568	357.59	329.34	24.568	350.82	348.17	24.567	247.5	230.35	24.567	249.51	241.07	222.67	24.569	188.48	216.15	24.569	199.86	240.99	163.44	24.568	194.69	227.45	24.568	177.86	204.2	178.2	24.568
25.269	0	25.268	280.38	261.05	25.267	307.16	272.37	243.15	25.268	274.66	25.269	350.83	309.74	25.267	263.7	25.269	375.32	330.29	25.268	318.28	343.65	25.267	358.17	328.9	25.269	351.31	348.48	25.269	246.99	230.15	25.267	249.98	234.03	223.86	25.269	188.56	215.64	25.268	202.9	241.29	162.95	25.269	194.98	227.75	25.268	177.94	204.24	178.34	25.27
25.967	1.42	25.969	280.99	260.1	25.969	307.7	268.5	242.81	25.968	273.77	25.968	348.93	309.8	25.969	263.69	25.969	375.36	329.33	25.967	316.07	343.81	25.969	357.46	331.12	25.969	351.29	350.07	25.968	246.65	229.85	25.967	249.88	232.68	223.96	25.969	188.25	216.49	25.968	204.46	242.14	163.1	25.97	194.9	227.81	25.969	177.95	204.73	179.05	25.968
26.667	15.72	26.667	281.31	261.01	26.667	307.83	266.73	242.96	26.668	274.44	26.669	347.48	309.56	26.667	262.99	26.67	375.07	329.73	26.668	315.05	344.88	26.668	357.37	330.83	26.669	351.28	349.85	26.67	245.76	230.26	26.669	248.97	230.58	223.87	26.669	188.8	216.54	26.669	202.87	242.5	162.98	26.667	195.02	227.79	26.669	178.14	204.89	178.63	26.667
27.368	20.27	27.367	281.93	260.78	27.367	306.75	264.26	242.22	27.367	274.42	27.369	347.47	309.62	27.367	263.37	27.37	376.7	330.56	27.368	314.11	344.65	27.368	357.2	329.7	27.369	352.01	350.78	27.369	245.67	230.02	27.367	247.83	230.13	221.9	27.367	188.03	216.1	27.368	201.47	242.54	163.55	27.368	195.31	227.47	27.369	178.19	205.2	178.56	27.368
28.068	22.11	28.067	281.14	259	28.067	307.31	266.92	242.52	28.067	274.36	28.069	349.07	309.67	28.067	263.32	28.069	376.24	330.34	28.069	312.92	344.63	28.068	356.72	330.37	28.069	350.81	351.06	28.068	246.28	229.76	28.068	246.68	229.42	223.95	28.067	188.04	215.6	28.068	201.14	243.05	163.32	28.067	194.95	227.53	28.067	178.17	204.93	178.19	28.068
28.768	24.84	28.767	280.61	261.01	28.767	307.23	267.75	242.88	28.768	274.38	28.769	351.9	309.87	28.768	261.59	28.769	376.82	329.54	28.768	314.66	344.2	28.768	357.1	330.41	28.769	350.68	350.43	28.769	246.22	230.01	28.767	247.8	229.29	224.03	28.768	188.67	214.68	28.768	200.98	243.46	163.18	28.769	195.11	227.47	28.768	178.49	205.13	178.36	28.768
29.468	17.81	29.468	280.86	261.1	29.468	299.16	265.91	244.11	29.468	273.97	29.468	351.73	310.68	29.468	263.31	29.467	376.05	330.56	29.469	313.42	344.88	29.468	357.77	330.88	29.469	350.22	350.4	29.469	245.28	229.69	29.469	249.07	230.64	224.48	29.468	188.42	215.56	29.468	200.73	243.6	163.49	29.468	195.29	227.75	29.469	178.46	205.5	178.41	29.468
30.168	11.39	30.168	280.53	259.75	30.167	295.67	261.86	246.51	30.168	274.39	30.168	350.97	310.12	30.167	262.77	30.169	376.03	330.1	30.169	312.13	344.92	30.17	357.21	330.63	30.168	351.06	350.92	30.169	245.16	230.11	30.169	249.13	229.75	224.48	30.169	188.79	216.56	30.168	200.8	243.77	163.5	30.168	194.9	227.49	30.169	178.24	204.65	178.4	30.168
30.867	9.36	30.867	280.72	259.85	30.867	295.95	262.43	254.91	30.868	273.97	30.869	349.36	309.62	30.868	263.34	30.868	375.69	329.93	30.869	313.28	345.85	30.868	357.39	331.83	30.869	350.49	351.08	30.869	253.26	229.65	30.867	249.46	229.44	224.45	30.869	188.76	214.43	30.868	200.28	244.09	163.66	30.868	195.23	227.67	30.868	178.21	201.05	178.51	30.869
31.568	5.61	31.567	280.71	259.18	31.567	295.19	263.08	255.03	31.567	273.96	31.568	349.67	310.12	31.568	263.46	31.568	375.34	329.51	31.567	313.48	345.12	31.568	356.72	330.85	31.569	350.2	350.48	31.566	256.59	229.65	31.569	248.9	228.33	225.31	31.567	188.93	215.74	31.568	200.05	244.45	163.71	31.568	195.75	227.49	31.569	177.88	199.32	178.29	31.569
32.269	5.28	32.267	282.64	259.37	32.269	296.82	263.48	254.31	32.267	274.61	32.268	348.71	310.24	32.268	263.06	32.268	374.47	330.25	32.268	313.43	345.67	32.268	357.19	331.33	32.267	350.18	350.46	32.266	251.74	230.03	32.269	247.07	227.47	224.94	32.27	189	215.02	32.269	199.64	244.34	164.11	32.269	195.39	234.74	32.269	178.15	198.6	176.78	32.269
32.967	5.1	32.967	280.92	258.94	32.967	297.19	262.71	249.83	32.968	274.32	32.969	349.96	310.79	32.968	264.21	32.968	356.7	329.81	32.968	314.17	345.83	32.968	357.35	331.91	32.967	350.79	350.49	32.967	248.62	229.57	32.968	247.83	228.61	225.13	32.968	188.77	216.12	32.97	199.74	244.51	164.16	32.967	195.35	235.88	32.969	177.84	200.44	175.73	32.969
33.667	4.71	33.667	279.9	258.86	33.669	299.7	262.63	247.35	33.668	274.49	33.669	349.49	311.85	33.668	265.04	33.669	354.92	329.44	33.668	313.38	345.06	33.669	357.24	331.63	33.669	350.08	350.82	33.668	248.03	228.97	33.671	248.24	228.58	223.54	33.669	188.93	215.88	33.67	199.85	244.43	163.84	33.667	195.12	231.98	33.67	177.11	202.7	176.92	33.67
34.369	2.57	34.369	279.79	258.34	34.368	300.82	262.86	246.08	34.367	275.17	34.368	348.23	310.9	34.367	263.72	34.368	360.95	329.49	34.369	312.54	344.38	34.368	357.15	331.23	34.367	349.64	350.26	34.368	247.42	229.11	34.367	248.29	227.57	220.3	34.369	188.53	213.75	34.37	199.86	239.93	163.91	34.367	195.21	229.63	34.37	176.44	203.44	177.06	34.369
35.068	2.55	35.068	279.37	259.89	35.069	302.51	263.06	244.76	35.068	274.89	35.067	349.71	310.56	35.068	263.01	35.068	367.83	329.01	35.067	313.36	345.29	35.07	357.01	331.66	35.068	349.72	350.62	35.066	247.31	229.17	35.069	249.02	227.31	218.24	35.068	189	225.01	35.068	199.94	229.96	164.74	35.067	195.54	227.71	35.068	176.92	203.95	176.95	35.066
35.768	2.27	35.768	279.86	264.84	35.768	303.51	263.22	245.18	35.768	274.66	35.767	348.54	310.84	35.768	262.86	35.767	370.88	329	35.767	312.92	344.45	35.768	357.29	331.68	35.768	350.47	351.04	35.768	247.33	229.13	35.767	249.81	229.06	221.34	35.769	189.09	229.91	35.77	199.76	230.93	165.64	35.767	195.05	227.06	35.768	177.52	204.33	176.77	35.767
36.468	2.95	36.467	297.41	277.12	36.468	303.98	263.29	244.94	36.47	274.57	36.468	348.42	311.34	36.468	263.78	36.469	370.48	328.97	36.469	312.57	343.04	36.468	357.42	332.01	36.469	349.77	350.7	36.468	246.49	228.91	36.468	250.01	228.89	222.26	36.467	188.65	234.65	36.469	199.72	238.31	166.18	36.468	196.57	227.57	36.469	177.95	204.68	177.71	36.469
37.169	2.7	37.168	301.85	283.83	37.168	304.39	263.96	244.32	37.17	274.4	37.168	349.59	310.75	37.168	262.37	37.168	372.85	336.44	37.169	311.86	342.81	37.168	357.39	331.73	37.169	333.56	350.8	37.169	246.64	229.11	37.168	250.13	227.01	223.12	37.169	188.78	226.89	37.17	199.86	240.24	165.08	37.168	198.3	227.2	37.169	177.96	205.06	177.88	37.167
37.869	2.77	37.868	294.93	280.09	37.868	305	264.74	243.82	37.868	274.87	37.869	350.31	310.79	37.866	262.54	37.869	373.5	341.32	37.869	312.52	342.87	37.87	357.17	331.73	37.867	333.48	351.11	37.868	246.17	229.34	37.868	249.84	228.34	223.27	37.868	188.48	223.91	37.869	199.79	240.5	163.3	37.867	196.72	227.55	37.869	178.22	204.89	178.24	37.867
38.569	2.64	38.567	285.94	274.83	38.569	304.53	264.82	244.34	38.569	270.45	38.567	348.78	310.48	38.568	262.27	38.568	373.72	336.09	38.568	312.52	343.84	38.566	357.25	330.18	38.567	337.93	350.7	38.568	246.49	227.61	38.568	249.84	226.9	223.44	38.568	189.44	219.96	38.568	199.72	241.31	163.84	38.567	197.38	227.19	38.569	178.16	204.97	177.66	38.568
39.267	1.51	39.269	285.44	267.52	39.269	305.35	272.22	244.16	39.269	274.55	39.268	350.55	318.86	39.269	262.86	39.268	373.13	331.71	39.268	312.71	344.4	39.269	356.91	329.59	39.267	349.79	351.22	39.269	246.31	238.83	39.268	250.42	226.26	223.99	39.266	188.72	217.1	39.268	199.39	241.38	162.9	39.267	196.56	228.11	39.27	177.86	205.26	177.61	39.268
39.97	2.54	39.969	285.02	269.43	39.97	305.89	274.6	243.94	39.97	274.42	39.968	347.36	323.43	39.967	262.57	39.969	373.36	330.31	39.969	313.62	343.89	39.968	356.44	330.78	39.967	350.45	350.89	39.969	246.65	241.15	39.968	249.82	227.78	224.38	39.97	188.5	216.37	39.968	199.91	242.06	163.19	39.969	196.46	227.68	39.97	178.1	205.59	177.48	39.967
40.67	1.81	40.668	284.7	268.15	40.668	305.85	268.09	243.7	40.67	274.12	40.668	350.22	324.1	40.666	261.56	40.669	373.84	331.01	40.668	313.01	344.12	40.668	356.72	330.35	40.667	350.57	351.09	40.667	245.51	233.25	40.667	250.07	227.09	224.83	40.669	189.14	215.98	40.668	199.56	242.24	163.01	40.667	195.48	227.71	40.669	178.04	205.33	177.8	40.667
41.369	6.39	41.369	284.38	266.95	41.368	306.49	267.96	243.81	41.368	274.52	41.367	350.69	321.19	41.367	262.34	41.367	373.74	330.09	41.366	314.23	344.12	41.368	356.35	330.62	41.368	351.34	350.8	41.367	245.71	227.39	41.369	250.13	226.42	224.88	41.369	188.28	214.89	41.368	199.63	243.02	163.2	41.368	195.54	227.34	41.37	178.3	205.67	177.63	41.368
42.07	6.58	42.067	283.67	265.84	42.068	306.17	264.4	244.59	42.068	274.3	42.068	348.06	313.1	42.067	262.4	42.069	374.73	330.26	42.068	315.61	344.23	42.067	356.39	331.1	42.068	351	351.12	42.068	245.05	227.99	42.068	250.31	227.47	225.02	42.067	188.87	215.48	42.068	199.41	243.24	163.27	42.068	195.26	227.68	42.069	178.13	204.1	177.47	42.068
42.769	3.42	42.767	284.06	264.37	42.768	306.11	264.54	242.95	42.767	275.1	42.768	348.77	310.15	42.767	261.5	42.768	375.48	330.44	42.768	314.56	343.96	42.768	356.55	331.36	42.768	351.34	350.67	42.768	245.19	227.99	42.768	247.91	226.38	224.79	42.767	188.78	215.4	42.767	199.51	243.22	163	42.769	194.99	227.3	42.767	178.05	200.34	177.21	42.768
43.469	4.11	43.467	283.98	263.06	43.468	305.75	264.84	244.76	43.468	278.66	43.469	350.38	308.61	43.467	262.01	43.468	374.71	330.41	43.466	313.28	344.2	43.467	356.19	330.65	43.467	353.05	350.71	43.469	255.07	227.31	43.467	246.13	228	224.52	43.467	188.74	215.55	43.467	201.11	243.62	163.09	43.465	195.06	227.79	43.467	175.47	199.83	177.55	43.468
44.167	2.89	44.167	284.57	263.21	44.169	305.75	264.7	243.71	44.168	280.45	44.167	348.48	308.94	44.169	261.19	44.169	374.84	329.83	44.169	312.98	344.7	44.167	355.83	331.15	44.167	353.14	350.99	44.168	255.32	227.04	44.168	246.3	227.3	224.59	44.168	188.6	216.05	44.167	202.87	243.61	163.13	44.167	194.82	227.54	44.169	175.48	200.78	177.33	44.168
44.867	1.93	44.867	284.12	263.24	44.868	305.18	271.2	242.04	44.867	283.44	44.867	348.93	309	44.868	261.09	44.869	374.84	329.71	44.867	313.17	343.64	44.869	356.02	330.51	44.867	352.68	351.4	44.868	248.1	227.07	44.868	248.31	227.32	224.52	44.867	188.5	216.39	44.864	200.09	243.86	163.04	44.869	194.7	227.05	44.869	173.3	202.12	177.62	44.867
45.566	2.74	45.568	285.05	263.42	45.569	296.79	268.83	249.85	45.567	280.83	45.567	348.87	308.87	45.567	260.88	45.565	374.99	330.02	45.568	313.47	343.99	45.567	355.09	330.64	45.568	353.16	351.11	45.568	245.85	227.09	45.569	249.58	239.71	224.57	45.567	188.33	215.33	45.568	199.08	244	163.66	45.567	194.75	230.58	45.567	171.82	202.71	177.02	45.568
46.268	2.48	46.268	286.13	262.77	46.268	293.69	267.05	253.18	46.269	277.51	46.269	348.85	308.53	46.266	261.33	46.268	374.93	329.18	46.268	312.07	344.32	46.269	356.24	330.71	46.269	353.06	351.34	46.269	246.96	226.77	46.269	248.99	238.9	224.92	46.268	188.43	216.17	46.269	200.17	244.06	163.66	46.267	195.08	233.84	46.267	171.77	203.14	177.14	46.269
46.968	2.12	46.967	285.1	262.23	46.968	295.58	264.61	251.2	46.969	275.95	46.969	347.86	308.22	46.967	261.72	46.966	374.9	329.04	46.969	312.76	344.5	46.969	356.32	326.26	46.968	353.8	351.61	46.969	246.44	227.4	46.969	249.07	232.12	224.81	46.968	188.64	214.59	46.969	199.86	244.27	163.98	46.968	195.45	229.72	46.968	172.27	204.08	177.07	46.968
47.668	2.72	47.667	286.24	262.72	47.668	297.45	263.99	246.97	47.669	275.23	47.667	347.77	309.44	47.667	261.47	47.669	375.1	329.61	47.667	312.82	344.33	47.669	346.32	313.41	47.668	353.98	351.42	47.668	246.47	226.92	47.669	249.32	229.89	221.57	47.668	189.06	214.72	47.668	199.95	244.4	164.09	47.669	195.37	227.26	47.667	172.73	204.38	177.67	47.668
48.367	2.23	48.367	285.64	262.13	48.368	298.56	264.37	244.45	48.368	274.99	48.368	347.49	309.57	48.367	261.51	48.369	374.93	330.32	48.367	312.85	343.93	48.369	344.4	310.59	48.368	353.36	351.46	48.368	246.84	227.44	48.371	249.33	227.67	217.34	48.368	189.19	215.04	48.368	199.5	244.67	163.94	48.368	195.19	226.98	48.367	173.72	204.4	176.62	48.368
49.067	3.05	49.067	285.26	262.45	49.067	301.21	264.06	243.43	49.069	273.61	49.067	347.86	309.68	49.067	261.44	49.07	374.33	329.77	49.067	314.14	343.49	49.068	345.37	315.65	49.068	353.59	350.85	49.069	246.12	226.82	49.069	249.27	229.29	219.42	49.064	188.46	215.4	49.069	199.53	244.76	165.5	49.068	195.14	226.98	49.067	173.91	204.56	173.82	49.068
49.767	2.76	49.768	285.77	268.38	49.767	301.78	263.16	243.48	49.768	274.25	49.769	351.85	309.47	49.766	262.5	49.769	374.78	328.69	49.767	313.33	343.78	49.768	347.8	324.07	49.769	353.85	351.48	49.768	247.71	226.88	49.768	249.77	232.8	221.55	49.767	195.14	221.67	49.768	199.58	244.76	166.17	49.766	195.46	227.4	49.767	174.53	204.68	174.79	49.769
50.467	2.42	50.467	285.49	281.47	50.468	303.1	265.3	243.57	50.468	274.62	50.467	378.57	309.56	50.466	261.05	50.469	374.99	328.88	50.468	312.29	344.03	50.469	350.22	327.86	50.469	354.23	351.3	50.468	255.21	227.16	50.469	250.02	229.41	222.81	50.468	195.31	223.54	50.468	199.22	244.9	166.02	50.468	195.24	227.4	50.469	175	204.66	176.04	50.468
51.168	22.71	51.168	284.78	280.32	51.168	303.4	263.64	243.08	51.168	274.48	51.167	377.96	310.01	51.169	261.59	51.169	375.03	329.15	51.168	311.32	344.22	51.169	352.48	329.28	51.169	354.65	351.26	51.168	247.32	235.9	51.168	249.9	227.75	223.22	51.168	193.99	220.36	51.169	199.36	245.03	164.18	51.168	195.28	227.52	51.17	175.1	204.81	176.54	51.168
51.869	28.51	51.869	284.61	269.83	51.867	303.24	263.42	243.18	51.868	274.81	51.868	352.46	310.4	51.867	261.59	51.867	374.28	328.9	51.868	312.3	344.44	51.869	354.73	329.91	51.869	354.22	351.3	51.868	245.83	237.1	51.868	249.17	233.53	223.38	51.868	190.98	218.55	51.868	199.1	244.41	162.82	51.869	195.37	227.6	51.868	175.17	204.55	176.49	51.863
52.567	22.94	52.568	284.79	270.62	52.567	303.7	263.42	242.46	52.567	274.12	52.568	345.8	310.21	52.569	261.89	52.567	373.62	329.28	52.567	312.08	342.93	52.569	355.73	329.61	52.569	354.15	350.89	52.567	245.97	228.42	52.568	246.25	234.35	223.66	52.568	189.34	215.07	52.569	199.33	244.65	162.38	52.567	195.37	227.97	52.567	175.88	201.19	176.34	52.568
53.268	18.36	53.267	283.95	268.1	53.269	303.44	263.32	243.13	53.267	274.5	53.267	347.16	310.31	53.267	261.91	53.267	373.25	328.19	53.268	312.06	342.24	53.269	355.89	331.23	53.269	353.89	351.46	53.267	246.64	226.38	53.268	246.79	226.83	223.84	53.268	189.65	213.63	53.269	199.21	244.75	162.73	53.266	195.45	227.7	53.268	175.98	198.65	176.26	53.268
53.969	12.08	53.969	284.72	268.16	53.967	304.03	263.27	243.12	53.969	274.93	53.968	347.11	310.9	53.967	261.36	53.967	372.61	327.74	53.969	312.23	341.48	53.969	357.17	330.13	53.969	354.05	350.69	53.968	247.2	225.66	53.968	247.53	225.5	224.34	53.968	189.48	216.01	53.969	199.75	244.99	162.76	53.968	196.41	227.9	53.968	175.26	198.55	176.64	53.968
54.669	8.72	54.669	284.89	265.12	54.667	303.63	264.43	243.12	54.663	274.57	54.667	346.54	310.42	54.666	261.95	54.668	372.82	329.56	54.668	314.34	340.81	54.669	358.3	330.98	54.667	353.77	350.09	54.667	246.64	225.89	54.67	248.16	225.46	223.77	54.668	188.42	216	54.669	199.47	244.79	162.99	54.668	196.82	227.97	54.669	174.54	200.18	177.11	54.668
55.369	6.73	55.368	284.75	263.84	55.367	303.41	265.99	243.41	55.368	274.47	55.367	346.09	310.96	55.367	261.32	55.368	372.51	329.08	55.368	316.99	340.44	55.37	358.74	331.02	55.367	353.93	349.22	55.368	247.01	226.71	55.369	248.19	225.5	224.18	55.368	188.56	215.71	55.369	199.98	245.04	163.2	55.368	196.3	227.73	55.369	174.29	202.13	177.5	55.368
56.067	5.81	56.067	282.95	263.28	56.067	301.6	266.11	243.14	56.067	274.27	56.067	346.99	310.83	56.068	262.14	56.068	372.44	328.46	56.068	315.72	340.34	56.07	359.01	331.82	56.067	353.79	350.59	56.066	245.91	227.17	56.068	248.95	226.4	224.61	56.069	188.17	215.37	56.069	202.71	244.81	163.06	56.068	197.69	227.85	56.067	173.78	202.81	177.52	56.068
56.767	4.34	56.767	282.92	262.94	56.768	300.37	262.95	243.59	56.769	270.68	56.769	347.38	311.42	56.767	261.61	56.768	371.87	327.89	56.768	317.45	341.51	56.769	359.61	332.64	56.767	354.03	350.7	56.769	246.08	227.12	56.768	247.58	224.88	224.38	56.767	188.76	214.71	56.77	202.03	244.94	163.04	56.768	197.62	227.79	56.767	174.17	203.51	177.23	56.768
57.468	3.4	57.468	283.45	263.59	57.469	301.93	263.66	242.2	57.467	270.81	57.468	347.03	311.26	57.468	261.88	57.468	372.47	327.54	57.468	326.41	343	57.469	359.55	331.46	57.468	353.43	350.68	57.468	244.94	226.85	57.468	246.34	224.99	224.46	57.47	189.11	213.82	57.469	201.24	245.09	162.73	57.469	197.59	228.29	57.468	174.52	204.08	177.52	57.467
58.168	3.46	58.168	284.28	262.25	58.167	303.29	263.23	247.19	58.169	270.67	58.168	347.65	311.45	58.168	262.58	58.168	371.72	327.32	58.168	321.06	343.33	58.169	359.87	331.53	58.168	353.6	351.4	58.168	245.04	227.14	58.168	247.1	225.39	224.23	58.168	188.5	213.67	58.17	200.91	244.43	162.93	58.168	196.84	228.07	58.169	175.24	203.93	177.21	58.167
58.867	2.67	58.869	284.39	263.13	58.867	303.6	267.8	251.29	58.867	275.26	58.867	346.7	310.96	58.868	260.56	58.868	372.64	327.43	58.868	314.51	343.05	58.869	359.29	331.24	58.868	353.65	350.15	58.869	244.45	227.33	58.868	248.3	225.26	218.61	58.869	189.03	214.21	58.869	200.21	244.7	163.02	58.869	196.21	227.77	58.869	175.87	200.53	177.37	58.867
59.568	2.29	59.567	284.18	261.9	59.567	304.49	268.71	249.78	59.568	274.01	59.566	347.83	311.02	59.566	260.6	59.567	371.77	327.83	59.568	311.5	343.12	59.569	360.53	331.29	59.566	353.6	350.65	59.567	244.32	234.63	59.567	248.71	225.9	217.99	59.567	188.91	215.94	59.568	200.22	245.36	163.34	59.568	196.15	228.14	59.567	176.18	199.88	177.4	59.568
60.268	2.75	60.269	283.32	262.12	60.268	305.05	265.43	244.05	60.269	274.42	60.267	347.95	311.34	60.268	260.83	60.269	371.11	327.01	60.27	312.49	343.24	60.269	360.3	328.27	60.267	353.97	350.53	60.268	244	229.33	60.268	248.97	224.34	221.53	60.267	188.83	215.35	60.27	199.85	245.19	163.42	60.268	195.21	227.58	60.267	175.86	201.27	177.43	60.268
60.968	2.29	60.968	283.93	261.88	60.967	305.16	264.82	242.33	60.969	273.73	60.967	346.89	311.35	60.966	260.07	60.967	353.18	327.36	60.969	312.11	343.48	60.968	360.32	326.39	60.966	354	350.9	60.968	250.47	225.99	60.968	248.03	224.69	222.68	60.969	189.29	214.21	60.968	199.26	245.07	163.42	60.97	195.18	227.71	60.969	175.99	202.31	177.12	60.968
61.668	3.36	61.668	284.53	260.32	61.667	304.78	264.67	243.53	61.668	273.92	61.669	347.12	312.61	61.667	260.96	61.669	349.61	326.94	61.669	311.98	343.58	61.669	360.22	331.1	61.667	353.6	350.85	61.67	254.68	225.53	61.668	245.57	225.3	222.79	61.667	188.94	213.13	61.668	199.53	245.39	163.37	61.668	195.33	227.87	61.669	176.43	203.18	175.7	61.668
62.369	2.47	62.369	284.79	261.04	62.368	305.42	265.16	243.48	62.368	274.38	62.367	347.9	322.12	62.367	261.95	62.369	351.85	326.96	62.369	311.46	343.44	62.368	360.24	332.59	62.367	353.9	350.43	62.368	249.54	225.88	62.368	246.65	224.72	222.91	62.366	188.98	214.78	62.367	199.28	245.89	163.38	62.369	195.13	227.77	62.369	176.43	203.36	175.08	62.367
63.068	2.69	63.068	283.69	260.81	63.068	305.79	264.77	243.73	63.068	278.99	63.069	345.93	323.85	63.066	261.03	63.067	363.07	326.19	63.067	311.91	343.7	63.069	360.15	331.11	63.068	353.57	350.83	63.069	246.07	226.03	63.068	247.37	225.47	223.54	63.069	188.91	213.6	63.069	199.38	235.45	163.49	63.068	195.21	227.94	63.068	176.57	204.22	175.24	63.067
63.767	1.38	63.767	284.07	260.49	63.769	305.56	264.77	244.19	63.77	282.08	63.767	346.16	322.7	63.766	262.1	63.768	368.23	327.03	63.766	312.69	343.2	63.768	360.04	331.33	63.768	354.13	350.64	63.769	244.76	226.68	63.768	248.01	225.02	223.86	63.766	188.94	215.46	63.767	199.34	226.54	163.15	63.769	194.99	227.29	63.768	176.85	203.5	175.95	63.767
64.468	1.76	64.467	284.93	259.95	64.468	306.09	264.27	242.91	64.469	280.66	64.469	348.17	314.44	64.468	262.2	64.468	369.09	327.01	64.468	313.78	342.77	64.469	359.98	331.91	64.466	354.54	350.85	64.47	245.48	226.57	64.468	248.53	226.06	220.18	64.466	189.21	214.31	64.468	198.98	228.88	164.77	64.469	195.37	227.31	64.468	176.74	204.25	176.18	64.469
65.168	1.5	65.167	283.86	261.14	65.168	306.65	265.36	242.55	65.169	276.11	65.168	347.79	310.23	65.167	261.66	65.169	369.19	326	65.167	313.36	342.84	65.169	359.98	331.81	65.168	354.2	351.33	65.17	245.07	226.91	65.168	249.17	228.08	221.12	65.168	189.34	229.21	65.169	199.46	236.28	165.24	65.17	195.39	226.79	65.167	177.12	200.73	176.24	65.167
65.866	2.17	65.867	285.38	259.96	65.869	306.52	264.17	243.28	65.868	270.88	65.868	347.13	310.08	65.867	260.07	65.867	369.64	326.57	65.866	315.22	341.71	65.868	359.57	331	65.868	353.83	351.17	65.869	244.75	226.04	65.867	246.68	226.7	222.55	65.868	188.84	237.47	65.87	200.39	239	165.86	65.87	195.16	232.52	65.867	177.01	199.27	176.22	65.869
66.569	2.08	66.566	292.24	260.95	66.569	306.56	263.98	243.83	66.568	270.12	66.567	347.82	308.86	66.568	262.98	66.567	370.12	327.13	66.567	315.19	343.06	66.568	359.18	331.04	66.568	353.98	350.92	66.569	244.62	226.31	66.569	246.62	226.78	223.12	66.568	189.26	232.31	66.567	202.48	239.27	164.25	66.57	195.25	237.09	66.57	177.16	199.9	176.32	66.567
67.267	1.98	67.268	297.62	262.95	67.27	306.74	263.83	243.43	67.268	269.39	67.267	347.41	309.01	67.267	261.93	67.267	371.29	326.51	67.268	315.98	342.88	67.267	359.07	331.22	67.267	354.32	350.99	67.269	245.01	226.29	67.268	246.56	225.65	223.71	67.266	189.28	225.51	67.269	200.88	239.23	162.44	67.268	195.85	232.89	67.267	177.31	201.72	176.18	67.267
67.967	1.48	67.967	288.52	262.24	67.971	306.85	263.72	244.67	67.968	269.98	67.967	347.87	309.03	67.967	260.89	67.968	371.59	326.62	67.968	314.06	342.15	67.969	359.01	330.66	67.968	354.08	351.57	67.969	244.39	225.94	67.969	246.64	226.15	223.15	67.968	188.69	225.16	67.968	200.46	239.87	162.31	67.97	195.72	228.75	67.968	177.51	202.73	176.73	67.968
68.667	3.12	68.668	290.4	260.15	68.669	307.57	266.65	244.85	68.668	270.76	68.667	345.39	308.91	68.666	261.78	68.669	371.22	326.83	68.668	313.39	342.45	68.669	358.22	330.73	68.669	354.28	351.5	68.669	243.97	225.63	68.667	247.85	224.65	223.97	68.668	188.59	223.88	68.669	199.97	240.65	162.33	68.668	195.66	227.13	68.668	177.21	203.18	177.14	68.667
69.368	1.96	69.367	286.35	260.62	69.367	307.49	267.29	244.78	69.368	270.49	69.368	345.5	309.19	69.366	261.95	69.367	371.08	327.18	69.367	315.62	343.33	69.369	360.21	330.96	69.367	354.33	351.62	69.365	249.69	225.86	69.368	249.22	224.88	223.78	69.37	189.11	219.14	69.369	200.05	241.1	162.88	69.369	195.51	227.55	69.368	176.88	203.35	176.97	69.369
70.068	2.05	70.067	286.59	261.38	70.067	307.36	266.42	244.29	70.068	274.71	70.068	346.71	308.69	70.066	262.07	70.068	371.31	327.21	70.066	314.93	337.16	70.069	361.47	330.18	70.067	354.54	351.5	70.068	253.01	226.6	70.067	249.14	225.21	223.7	70.068	189.01	219.59	70.068	199.4	241.49	162.84	70.068	195.39	227.37	70.069	174.33	203.43	176.32	70.067
70.766	2.75	70.767	284.46	260.16	70.767	306.99	266.04	245.27	70.767	274.65	70.769	346.23	308.69	70.767	261.59	70.769	371.55	326.27	70.768	313.71	325.48	70.769	360.43	331.26	70.768	354.82	351.28	70.77	248.83	225.83	70.769	246.74	225.75	219.32	70.769	188.8	216.47	70.769	199.25	241.75	162.77	70.768	195.33	227.17	70.768	174.34	203.65	176.36	70.767
71.468	2.59	71.469	284.05	260.32	71.469	306.98	265.2	244.51	71.468	274.37	71.469	349.11	308.88	71.466	262.48	71.47	372.23	325.96	71.468	312.7	322.49	71.47	360.07	330.59	71.468	354.73	351.15	71.469	243.09	225.85	71.468	247.4	225.5	220.06	71.468	189.15	215.26	71.467	198.82	241.3	162.8	71.468	195.19	226.85	71.469	171.98	204.13	176.11	71.468
72.168	2.27	72.168	284.32	259.68	72.167	307.65	266.9	243.74	72.167	274.77	72.168	348.96	309.01	72.169	261.86	72.17	373.17	326.61	72.169	313.98	323.98	72.17	359.36	330.1	72.169	354.56	351.64	72.168	244.49	226.06	72.17	247.27	228.52	221.88	72.169	189.34	215.31	72.169	199.65	242.22	162.66	72.168	195.64	226.45	72.169	171.38	204.42	176.32	72.168
72.868	2.81	72.867	283.66	261.07	72.867	307.38	277.79	243.49	72.868	274.47	72.869	349.37	308.97	72.867	260.86	72.867	373.42	326.31	72.867	312.94	329.41	72.87	358.63	331.16	72.869	340.52	351.52	72.868	244.15	226.21	72.87	248.44	243.02	222.72	72.869	189.45	215.52	72.869	199.11	242.57	162.76	72.869	195.92	226.69	72.869	171.59	205.04	176.34	72.863
73.567	2.38	73.566	283.94	260.67	73.568	307.2	275.96	243.48	73.567	270.68	73.57	354.49	309.11	73.567	260.02	73.567	373.62	326.34	73.567	313.12	335.28	73.568	358.66	330.54	73.568	339.41	349.33	73.57	244.02	233.39	73.568	249.15	243.75	223.13	73.568	189.06	216.25	73.569	199.01	242.81	163.03	73.568	195.97	226.93	73.569	172.88	203.68	176.64	73.568
74.267	3.93	74.267	283.65	278.03	74.268	306.31	269.67	244.24	74.267	270.27	74.268	370.45	308.97	74.267	260.01	74.267	374.38	326.22	74.267	314.82	337.05	74.268	358.51	330.38	74.269	347.83	341.05	74.268	244.41	235.24	74.268	249.49	240.99	223.58	74.27	188.9	216.24	74.268	199.23	243.27	162.92	74.269	195.72	227.04	74.269	173.4	200.66	176.85	74.267
74.966	23.52	74.968	284.65	284.12	74.968	306.66	267.11	244.38	74.968	269.81	74.969	361.81	309.53	74.967	259.73	74.969	373.8	326.97	74.969	316.26	337.98	74.968	358.69	331.52	74.967	352.15	340.68	74.969	242.87	232.35	74.968	249.63	235.6	224	74.968	189.36	215.15	74.97	199.09	243.34	162.98	74.969	195.1	227.13	74.968	173.97	199.04	177.07	74.967
75.669	31.52	75.668	284.36	285.86	75.668	306.68	263.94	244.63	75.668	268.46	75.668	355.93	310.19	75.667	259.97	75.668	373.23	328.43	75.668	317.09	339.1	75.669	358.42	330.75	75.669	351.99	345.12	75.669	244.28	226.16	75.669	249.91	230.98	223.96	75.669	189.83	216.04	75.669	199.02	243.37	163.37	75.668	195.41	227	75.67	174.48	200.91	176.83	75.669
76.367	29.86	76.364	284.79	287.38	76.368	306.8	264.47	244.77	76.367	271.78	76.369	354.2	309.87	76.367	260.48	76.369	367.7	328.45	76.368	314.38	339.6	76.37	358.42	331.11	76.368	352.31	348.48	76.37	244.61	225	76.367	249.97	227.86	224.5	76.369	189.4	215.85	76.369	198.99	243.08	163.37	76.368	195.75	226.98	76.368	174.83	201.39	176.68	76.367
77.068	24.61	77.066	284.83	280.51	77.068	306.68	264.9	244.02	77.069	276.42	77.069	351.92	309.77	77.067	260.9	77.069	356.65	326.2	77.069	312.9	339.91	77.069	358.11	331.1	77.066	352.44	349.81	77.068	243.64	224.61	77.068	249.65	227.68	223.95	77.07	187.89	214.63	77.069	198.8	243.26	163.25	77.067	195.57	227.3	77.069	175.28	202.66	177.14	77.069
77.766	17.43	77.768	284.79	272.5	77.77	306.17	264.68	243.7	77.768	279.81	77.769	352.7	310.66	77.767	260.67	77.767	362.07	326.02	77.767	312.09	340.15	77.769	358.29	330.73	77.767	352.64	350.57	77.769	243.34	224.69	77.767	248.77	228.31	223.78	77.769	194.06	214.72	77.769	199.13	243.54	163.28	77.768	195.37	227.32	77.768	175.39	202.85	177.14	77.767
78.468	13.12	78.469	284.11	270.27	78.469	305.79	264.69	243.01	78.468	275.41	78.469	350.89	310.53	78.468	260.12	78.47	370.07	327.19	78.469	314.14	340.39	78.468	360.26	330.67	78.468	352.36	351.92	78.469	242.14	224.59	78.467	245.53	228.18	223.51	78.469	194.4	216.23	78.469	199.52	243.71	163.11	78.468	195.79	227.39	78.47	175.64	203.45	177.12	78.468
79.168	9.62	79.168	284.55	269.06	79.169	305.97	264.02	242.49	79.17	273.63	79.169	350.36	310.09	79.168	261.49	79.168	370.38	326.89	79.168	315.19	341.09	79.17	359.58	331.48	79.168	352.78	352.99	79.169	241.68	224.19	79.167	245.41	226.69	223.56	79.17	193.38	216.42	79.17	201.72	244.23	163.21	79.17	195.58	226.61	79.17	175.88	203.2	177.07	79.168
79.868	8.49	79.867	284.89	267.71	79.869	306.74	264.41	243.49	79.868	273.84	79.87	349.89	310.77	79.867	261.62	79.867	369.89	326.25	79.868	314.13	341.79	79.87	359.62	331.26	79.869	353.57	352.97	79.868	241.65	224.65	79.868	246.59	226.77	223.48	79.87	190.37	215.93	79.868	201.49	243.73	163.47	79.868	195.77	229.81	79.869	176	203.58	176.86	79.867
80.567	7.45	80.567	284.95	265.79	80.568	306.56	264.11	244.84	80.568	272.83	80.568	348.47	310.82	80.566	261.25	80.569	371.03	326.03	80.568	314.98	342.45	80.569	359.3	331.92	80.567	352.79	352.66	80.568	242.05	225.15	80.567	247.95	227.84	223.32	80.57	189.01	216.66	80.567	200.41	243.88	162.99	80.568	195.26	234.67	80.571	175.96	203.67	176.75	80.566
81.268	6.71	81.267	284.8	265.57	81.268	306.85	263.4	244.11	81.267	269.07	81.269	348.43	310.64	81.266	261.03	81.267	371.17	326.57	81.267	317.01	342.03	81.269	359.1	331.72	81.268	352.89	352.35	81.268	241.37	230.04	81.267	248.45	225.18	218.36	81.269	188.48	213.7	81.268	200.09	244.63	163.06	81.267	196.28	233.12	81.269	176.11	202.4	176.64	81.268
81.964	5.41	81.967	289.09	264.1	81.969	306.18	266.54	243.96	81.968	269.53	81.969	348.41	311.12	81.967	261.03	81.968	372.32	325.83	81.969	318.14	342.14	81.968	358.67	330.79	81.968	352.46	352.59	81.967	241.03	233.33	81.968	248.42	225.56	215.66	81.969	188.48	214.22	81.968	200.05	244.38	165.08	81.969	196.3	230.21	81.969	176.48	198.3	176.57	81.969
82.668	4.42	82.667	302.16	263.64	82.669	306.2	270.25	244.51	82.669	270.56	82.668	347.64	311.18	82.668	261.07	82.669	372.86	325.2	82.668	315.33	341.61	82.669	358.87	331.84	82.669	352.6	352.07	82.668	240.8	226.7	82.667	248.64	234.71	218.98	82.67	188.01	214.66	82.667	200.12	244.24	166.59	82.669	197.61	228.3	82.669	176.38	197.3	176.63	82.667
83.368	4.24	83.368	295.39	262.9	83.368	296.01	273.72	248.07	83.367	270.52	83.369	348.47	310.97	83.368	261.64	83.368	372.62	325.5	83.368	313.77	342.2	83.368	359	332.15	83.369	352.32	352.08	83.368	240.15	224.23	83.369	249.44	237.94	221.12	83.368	187.63	214.65	83.367	200.17	244.18	165.19	83.368	196.58	226.37	83.369	176.88	200.24	176.8	83.368
84.069	3.47	84.068	287.11	263.7	84.069	297.46	268.76	254.17	84.069	271.13	84.067	348.27	311.33	84.067	261.93	84.069	373.08	325.4	84.068	313.68	342.84	84.068	358.85	331.83	84.067	352.47	351.54	84.068	239.45	224	84.067	249.8	239.11	221.69	84.069	187.76	215.61	84.068	199.98	244.45	162.46	84.067	196.87	226.2	84.069	176.78	201.9	176.87	84.069
84.767	2.26	84.768	287.01	263.3	84.769	297.41	265.4	263.4	84.769	271.14	84.767	347.95	311.64	84.768	261.23	84.768	371.95	326.29	84.768	314.84	343.19	84.768	360.53	331.79	84.768	352.86	351.56	84.768	239.72	224	84.767	249.43	234.22	222.17	84.769	188.15	215.25	84.769	199.89	244.1	162.3	84.768	196.04	226.39	84.767	174.54	202.28	176.51	84.768
85.468	2.64	85.466	284.55	261.36	85.469	298.35	265.61	257.04	85.468	271.17	85.468	346.66	311.57	85.467	261.08	85.468	369.66	327.88	85.468	313.76	343.72	85.468	361.11	332.05	85.47	352.31	351.11	85.469	239.45	223.24	85.467	248.4	230.68	222.28	85.467	188.59	227.79	85.468	199.25	237.81	162.04	85.469	195.92	226.14	85.468	173.5	203.09	176.59	85.468
86.169	2.04	86.168	283.81	261.49	86.169	298.3	265.85	252.36	86.168	271.15	86.168	346.84	310.65	86.168	261.88	86.169	369.67	328.17	86.167	315.08	343.22	86.168	360.62	331.7	86.168	352.2	351.64	86.168	238.63	223.37	86.169	249.56	228.21	222.7	86.169	188.22	228.89	86.169	198.96	227.57	162.12	86.168	195.31	226.07	86.168	172.46	202.95	176.61	86.167
86.867	2.69	86.869	283.55	261.98	86.869	299.72	264.89	249.84	86.868	271.5	86.869	346.74	310.32	86.866	261.6	86.869	371	325.93	86.867	313.18	343.52	86.869	359.46	331.69	86.868	352.09	350.89	86.868	239.01	222.91	86.867	250.32	226.94	223.12	86.867	188.35	226.94	86.868	198.88	227.54	162.48	86.868	195.19	226.49	86.87	172.03	202.91	176.3	86.869
87.567	2.42	87.567	283.85	259.98	87.57	301.49	265.7	248.06	87.566	271.02	87.569	348.52	311.23	87.566	260.4	87.568	371.18	325.44	87.566	314.46	344.41	87.567	359.25	331.73	87.568	351.99	350.45	87.567	243.16	223.1	87.57	249.67	225.34	223.51	87.569	188.1	221.79	87.568	198.87	234.37	162.56	87.568	195.05	226.42	87.569	172.44	199.84	176.34	87.569
88.267	2.39	88.267	283.75	267.82	88.268	303.56	266.87	246.01	88.267	269.14	88.267	378.13	310.14	88.267	260.88	88.268	371.39	326.31	88.267	312.75	345.45	88.268	358.75	331.64	88.267	352.78	350.44	88.27	251.13	222.93	88.269	247.6	225.42	223.4	88.267	188.38	222.92	88.268	198.69	237.87	162.71	88.268	195.19	226.75	88.269	173.2	199.41	174.06	88.269
88.967	2.27	88.969	283.97	274.57	88.971	304.56	266.74	245.65	88.967	272.17	88.969	376.77	310.6	88.968	262.12	88.968	371.34	325.75	88.968	313.68	343.52	88.967	358.52	332.96	88.969	352.8	350.11	88.968	252.29	223.18	88.968	244.04	224.88	223.57	88.969	188.05	219.15	88.968	198.63	238.56	162.48	88.969	194.94	226.72	88.968	173.55	201.12	173.57	88.968
89.667	2.42	89.668	283.87	270.24	89.668	304.97	265.64	244.78	89.667	275.48	89.669	352.47	311.02	89.669	262.59	89.67	372.68	325.13	89.668	312.72	343.3	89.667	357.78	332.38	89.67	352.51	350.52	89.668	242.86	223	89.668	242.26	224.66	220.17	89.668	188.3	216.5	89.669	198.78	239.41	162.47	89.669	194.88	226.86	89.668	174.28	202.91	174.09	89.668
90.367	2.1	90.369	284.15	270.16	90.37	305.09	264.59	243.8	90.367	272.96	90.368	346.38	310.77	90.368	262.65	90.37	372.62	325.16	90.369	313.72	342.82	90.369	358.05	331.79	90.369	352.54	350.51	90.363	241.38	223.13	90.37	244.43	225.73	217.09	90.368	188.66	216.28	90.368	198.39	239.51	162.62	90.368	194.72	227.18	90.368	174.85	202.93	174.67	90.367
91.068	2.37	91.069	284.66	266.2	91.068	305.81	264.89	252.41	91.067	271.52	91.067	346.14	310.51	91.068	261.12	91.07	372.52	325.26	91.069	312.56	343.73	91.069	358.44	332.11	91.069	352.46	350.56	91.068	241.9	223.39	91.069	245.89	226.15	216.53	91.068	188.4	214.94	91.069	198.26	240.11	162.69	91.067	194.41	227.15	91.069	175.26	203.11	175.37	91.067
91.766	12.63	91.767	285.34	264.23	91.768	306.15	264.6	250.09	91.767	270.49	91.768	349.16	310.26	91.768	262.14	91.769	372.56	326.1	91.767	313.5	343.55	91.767	358.16	331.79	91.769	352.57	350.2	91.768	242.69	223.54	91.767	247.4	224.73	220.37	91.767	188.44	216.18	91.769	198.39	240.51	162.57	91.767	194.52	227.15	91.769	175.33	203.45	175.76	91.769
92.469	19.07	92.469	285.38	264.11	92.469	307.17	265.29	246.75	92.468	269.12	92.469	347.87	309.94	92.468	262.43	92.47	372.34	325.63	92.468	313.61	343.39	92.467	358.48	331.68	92.469	352.5	350.47	92.469	242.96	231.23	92.468	247.95	226.73	221.28	92.468	188.37	215.2	92.469	198.67	241.24	162.44	92.469	194.57	227.47	92.469	175.79	204.1	175.5	92.468
93.169	18.24	93.167	285.02	262.5	93.169	306.66	268.8	246.32	93.167	268.46	93.168	347.42	310.09	93.167	261.31	93.169	370.32	325.51	93.167	313.84	343	93.169	358.29	332.29	93.168	352.26	350.08	93.169	242.87	235.13	93.168	248.27	225.64	221.33	93.168	188.58	216.69	93.168	198.7	241.36	162.51	93.169	194.65	227.31	93.168	175.98	203.99	175.55	93.168
93.867	9.1	93.869	285.12	262.47	93.868	307.04	271.38	245.37	93.868	269.14	93.868	346.7	309.81	93.867	261.97	93.869	370.37	325.44	93.868	312.56	340.76	93.868	358.42	332.45	93.868	352.78	351.02	93.868	242.47	233.45	93.867	248.19	225.55	221.6	93.868	188.24	214.9	93.868	198.63	241.55	162.59	93.867	194.72	227.22	93.868	176.17	203.76	176.03	93.869
94.569	5.64	94.569	283.68	261.54	94.567	306.36	268.78	246.09	94.568	269.56	94.57	347.4	309.66	94.568	261.69	94.569	371.34	324.96	94.569	314.35	341.48	94.567	358.3	330.69	94.569	352.28	350.25	94.568	242.22	224.97	94.569	247.53	224.32	221.97	94.565	188.84	215.18	94.568	198.54	241.75	162.67	94.567	194.83	226.06	94.569	176.08	199.7	175.81	94.567
95.267	2.47	95.268	284.26	261.75	95.268	306.99	266.66	244.98	95.268	269.79	95.268	345.69	310.11	95.268	261.5	95.267	371.99	325.02	95.269	313.13	343.48	95.27	358.18	329.45	95.269	351.85	349.92	95.268	241.4	224.36	95.269	246.85	224.68	222.74	95.269	188.47	214.99	95.268	200.56	242.01	162.66	95.268	194.93	232.33	95.268	176.22	198.09	176.83	95.268
95.97	2.95	95.969	284.5	261.74	95.968	307.01	265.38	246.59	95.968	270.17	95.97	345.37	309.87	95.968	260.94	95.968	371.97	325.6	95.969	312.3	343.78	95.968	357.98	330.05	95.97	348.87	350.46	95.969	241	223.42	95.969	246.79	225.8	222.78	95.969	188.57	214.95	95.97	201.56	242.43	162.7	95.968	194.91	235.66	95.967	176.33	197.07	176.92	95.969
96.667	2.05	96.668	284.11	261.69	96.67	307.26	265.09	245.73	96.668	269.66	96.668	345.78	309.62	96.668	260.33	96.667	373.23	325.53	96.668	312.18	343.23	96.668	358.4	328.07	96.668	334.61	350.17	96.667	241	222.69	96.669	248.31	224.45	223.38	96.669	188.99	214.8	96.669	202.23	242.45	162.79	96.669	194.82	230.8	96.669	176.3	197.66	177.03	96.669
97.368	1.21	97.368	283.73	261.55	97.368	307.17	264.83	245.52	97.367	269.82	97.369	345.73	309.86	97.368	260.68	97.369	372.59	325.83	97.368	316	342.94	97.368	358.17	319.65	97.367	332.08	350.62	97.368	240.27	223.08	97.368	248.24	224.42	223.58	97.369	192.89	216.98	97.369	200.1	242.77	162.73	97.368	194.82	227.85	97.369	176.33	199.56	177.16	97.367
98.068	1.37	98.068	284.36	260.29	98.069	306.95	264.8	244.58	98.067	269.85	98.068	345.88	309.52	98.068	260.76	98.068	372.88	324.94	98.069	315.15	343.26	98.069	358.08	320.32	98.067	344.23	350.91	98.068	239.86	222.85	98.068	248.82	224.78	223.83	98.064	192.1	213.94	98.068	199.53	242.59	162.47	98.068	194.9	226.14	98.069	176.55	200.36	177.26	98.069
98.768	1.67	98.768	285.95	261.46	98.767	306.95	263.85	246.32	98.768	270.21	98.769	345.83	309.63	98.768	260.24	98.769	371.68	325.31	98.768	314.41	343.3	98.769	357.96	326.94	98.768	351.81	350.7	98.767	238.95	222.92	98.769	248.46	242.83	223.84	98.769	190.31	215.72	98.77	199.72	243.04	162.84	98.768	195.19	226.12	98.767	176.39	200.97	177.31	98.769
99.468	1.08	99.468	287.04	260.52	99.468	307.35	263.35	246.07	99.467	269.82	99.469	345.61	309.78	99.469	260.19	99.467	371.51	325.49	99.469	313.19	343.78	99.469	357.69	328.58	99.468	352.57	350.79	99.467	239.5	222.78	99.47	248.57	249.86	224.01	99.469	188.82	215.43	99.468	200	242.84	162.53	99.469	195.68	226.5	99.47	176.39	202.18	176.88	99.468
100.168	1.29	100.168	286.75	260.93	100.168	306.59	262.14	244.82	100.167	269.74	100.169	347.44	310.19	100.168	259.89	100.169	371.22	325.94	100.169	313.53	343.56	100.17	357.28	329.6	100.169	352.31	349.76	100.167	239.23	223.3	100.168	248.87	245.38	222.67	100.17	188.93	214.76	100.17	199.86	243.25	164.56	100.168	197.36	226.43	100.169	176.77	202.54	176.78	100.168
100.869	1.72	100.867	286.27	261.91	100.868	306.57	262.26	244.53	100.868	270.38	100.87	346.24	310.92	100.867	259.57	100.869	371.42	325.98	100.869	313.42	342.36	100.864	347.29	329.96	100.868	352.1	349.99	100.863	238.93	222.7	100.868	248.57	237.34	216.73	100.868	188.67	215.53	100.869	199.19	243.23	165.19	100.869	198.96	226.78	100.864	176.47	202.99	176.57	100.867
101.568	3.03	101.567	285.12	263.74	101.568	306.77	263.03	245.13	101.567	270.13	101.566	346.1	310.84	101.567	259.87	101.569	370.77	325.56	101.569	316.13	343.26	101.568	345.66	330.38	101.568	351.97	349.65	101.567	245.8	223.48	101.568	248.3	230.5	217.53	101.568	188.43	216	101.568	199.35	243.57	164.63	101.569	196.35	226.37	101.569	176.47	203.13	176.95	101.567
102.269	3.16	102.267	284.99	263.24	102.268	306.66	263.07	245.24	102.27	269.3	102.269	346.27	310.64	102.267	260.87	102.268	366.8	324.16	102.27	316.83	342.73	102.27	350.4	330.21	102.268	349.81	349.19	102.269	249.05	232.61	102.268	248.31	227.09	220.59	102.267	188.49	215.25	102.269	198.65	243.45	161.97	102.268	196.72	226.78	102.268	176.51	203.33	176.75	102.269
102.969	2.61	102.969	283.9	263.61	102.969	306.96	266.14	245.11	102.969	270.18	102.967	346.17	311.43	102.967	260.69	102.969	367.16	324.15	102.968	315.92	341.28	102.964	352.63	330.25	102.968	350.71	349.9	102.969	241.79	236.14	102.969	248.16	226.11	220.63	102.969	188.35	215.46	102.968	198.6	243.43	161.55	102.968	195.78	226.88	102.968	176.47	203.39	176.19	102.967
103.669	1.89	103.667	284.25	262.61	103.669	307.3	272.15	245.55	103.669	273.38	103.668	346.26	311.02	103.668	258.73	103.668	369.97	325.74	103.669	313.35	341.42	103.669	355.45	330.66	103.667	352.24	349.32	103.669	240.47	226.07	103.67	246.53	225	221.11	103.668	188.77	214.71	103.668	198.6	243.72	161.32	103.668	195.81	226.51	103.67	175.95	204.06	176.29	103.667
104.365	2.07	104.369	284.08	261.87	104.37	306.88	270.51	244.75	104.369	277.93	104.366	345.13	311.48	104.368	259.57	104.369	370.71	324.95	104.369	314.66	341.99	104.364	356.19	330.28	104.369	352.05	348.92	104.368	241.28	223.82	104.369	243.6	224.6	221.56	104.368	188.74	220.84	104.366	198.61	243.59	161.36	104.368	195.27	227.01	104.37	173.83	203.96	176.36	104.368
105.069	2.67	105.068	283.84	260.62	105.069	306.56	268.32	245.32	105.068	277.44	105.068	346.33	311.82	105.067	260.45	105.069	370.87	324.99	105.068	314.81	341.29	105.068	357.63	330.71	105.068	352.26	349.24	105.068	240.75	222.96	105.07	242.3	223.76	222.23	105.067	188.86	230.28	105.067	198.62	243.64	161.85	105.068	194.82	226.95	105.07	174.15	204.1	176.32	105.068
105.769	2.89	105.77	283.93	260.44	105.768	306.26	265.97	245.23	105.769	272.81	105.768	344.91	312.6	105.767	259.81	105.769	370.11	324.99	105.768	314.82	340.32	105.768	358.07	330.45	105.768	351.75	350	105.768	240.48	222.71	105.768	245.03	223.67	221.9	105.768	188.12	229.01	105.769	197.98	243.52	162	105.767	195.14	227.1	105.77	171.32	204.14	174.8	105.769
106.468	2.45	106.467	283.99	261.67	106.468	307.64	265.41	244.95	106.469	271.28	106.468	345.09	312.31	106.468	260.42	106.469	370.12	325.29	106.468	314.73	340.59	106.468	358.44	330.72	106.468	351.19	349.57	106.468	239.66	221.74	106.468	246.41	224.47	222.36	106.468	188.48	222.18	106.469	198.17	243.86	161.82	106.469	194.76	227.09	106.469	171.35	203.91	172.62	106.468
107.17	3.77	107.168	283.33	274.23	107.17	308	267.42	245	107.169	270.81	107.168	345.96	311.23	107.168	259.26	107.169	370.59	324.09	107.169	316.04	341.77	107.168	358.84	330.44	107.168	351.58	347.45	107.167	238.93	222.03	107.17	246.53	223.86	223.16	107.168	188.32	222.51	107.169	198.07	243.5	161.57	107.168	194.79	226.95	107.167	172.3	202.41	172.98	107.168
107.867	18.54	107.868	283.44	281.43	107.868	307.83	269.74	245.37	107.868	270.17	107.867	346.59	311.68	107.866	260.03	107.869	369.91	324.89	107.869	314.43	341.35	107.868	359.65	330.13	107.868	351.07	341.06	107.868	239.55	222.8	107.868	247.16	223.92	223.41	107.868	189.13	219.48	107.87	198.06	243.9	161.6	107.869	194.69	227	107.867	172.43	199.38	174.28	107.868
108.568	24.03	108.568	283.79	277.9	108.568	308.29	269.32	245.2	108.568	271.11	108.568	354.85	311.6	108.568	259.98	108.568	369.87	325.37	108.568	314.5	342.1	108.569	361.13	330.17	108.568	351.12	339.25	108.567	238.61	222.24	108.568	247.05	224.11	223.79	108.568	189.22	218.39	108.569	198.12	243.51	161.79	108.568	194.72	226.72	108.569	171.71	197.88	174.65	108.568
109.268	21.71	109.268	298.12	281.9	109.268	308.74	267.47	245.5	109.267	270.58	109.268	389.76	320.75	109.266	260.93	109.269	369.22	325.27	109.268	314.72	341.81	109.268	361.57	331.04	109.269	351.17	343.28	109.268	248.05	222.15	109.269	247.3	224.81	224.18	109.268	189.03	218.27	109.269	198.3	243.78	162.02	109.268	194.32	226.76	109.269	172.57	197.31	175.38	109.268
109.967	17.45	109.968	297.56	275.06	109.969	308.55	267.23	244.75	109.969	269.97	109.969	383.84	322.99	109.968	261.29	109.969	369	325.14	109.967	314.07	342.03	109.967	360.72	330.82	109.969	351.14	345.24	109.969	249.18	222.61	109.97	247.48	223.73	223.66	109.967	189.55	216.99	109.969	198.32	243.68	162.5	109.968	194.63	226.93	109.969	171.91	197.9	175.83	109.969
110.667	10.94	110.668	289.51	272.67	110.667	308.63	265.99	253.8	110.669	270.09	110.668	364.43	322.68	110.668	260.65	110.669	368.85	326	110.667	314.74	342.72	110.669	360.24	330.14	110.668	351.14	348.49	110.669	240.6	222.65	110.669	247.55	225.08	223.52	110.668	188.95	217.49	110.669	198.97	243.68	162.45	110.668	194.44	226.93	110.669	172.32	199.39	175.57	110.669
111.364	7.96	111.368	286.05	269.82	111.368	309	265.99	259.9	111.368	270.28	111.367	349.6	320.75	111.368	259.2	111.369	363.82	324.98	111.367	314.2	343.05	111.368	361.05	330.03	111.37	350.94	348.49	111.363	238.87	222.25	111.369	246.26	225.06	224.02	111.367	188.83	215.91	111.369	202.81	234.47	162.39	111.367	194.74	225.8	111.368	173.23	199.99	175.67	111.368
112.068	5.36	112.067	284.84	268.66	112.068	309.45	265.85	256.82	112.068	270.68	112.068	348.08	313.65	112.066	260	112.069	348.39	325.15	112.068	314.55	334.55	112.068	360.78	330.53	112.068	350.48	349.71	112.067	240.6	221.85	112.069	244.85	225.28	223.83	112.068	188.84	215.71	112.069	201.48	226.22	162.24	112.067	195.08	232.28	112.068	173.76	200.87	175.8	112.067
112.767	5.42	112.768	285.76	266.24	112.768	309.82	265.51	249.88	112.768	271.09	112.769	347.5	309.46	112.767	260.44	112.77	347.82	324.1	112.768	322.87	327.59	112.769	360.33	329.07	112.768	350.5	350.18	112.769	240.86	222.09	112.769	246.62	224.87	223.58	112.767	189.1	216.05	112.768	199.33	228.85	162.13	112.766	194.75	236.35	112.769	174.03	201.11	175.91	112.769
113.468	4.87	113.468	286.68	266.82	113.468	309.76	265.13	248.27	113.469	270.95	113.469	346.51	308.06	113.467	260.84	113.47	356.59	324.88	113.468	327.67	323.32	113.469	360.09	331.38	113.469	351.18	350.57	113.469	239.96	221.83	113.468	247.75	224.54	223.73	113.468	189.07	215.62	113.469	199.76	235.4	162.36	113.468	194.81	233.67	113.469	174.29	201.87	176.17	113.469
114.168	3.79	114.168	288.99	266.89	114.169	309.52	264.68	246.69	114.169	271.11	114.168	346.15	307.86	114.168	285.83	114.169	363.34	325.02	114.168	323.82	324.75	114.17	359.86	331.01	114.169	351.04	350.69	114.169	239.71	221.98	114.168	247.76	224.79	223.91	114.169	189.42	215.33	114.17	199.64	237.67	162.07	114.168	195	229.06	114.168	175.18	202.25	176.68	114.169
114.868	2.1	114.868	291.22	266.31	114.868	310.68	264.6	246.26	114.868	271.19	114.868	345.15	307.14	114.868	297.58	114.87	365.29	331.55	114.867	316.7	326.79	114.868	359.91	330.59	114.869	350.86	351.36	114.87	239.03	221.12	114.869	247.8	224.33	221.78	114.867	189.19	214.49	114.868	198.85	237.62	162	114.869	194.44	227.28	114.868	175.11	201.19	176.33	114.868
115.567	2.1	115.567	288.26	266.54	115.568	310.61	266.04	245.27	115.569	271.77	115.568	345.66	308.1	115.567	297.38	115.568	365.7	335.13	115.568	315.9	328.19	115.569	359.57	330.27	115.568	350.96	351.41	115.568	241.41	221.55	115.569	247.97	224.18	216.74	115.568	192.81	214.83	115.568	198.91	238.23	162.11	115.566	194.78	226.2	115.569	174.55	200.14	176.73	115.568
116.267	3.02	116.267	286.13	266.4	116.267	311.31	271.44	245.29	116.267	270.93	116.268	346.91	307.2	116.268	287.69	116.268	365.84	334.62	116.268	315.26	330.01	116.268	359.85	330.17	116.267	351.15	350.82	116.27	246.6	221.98	116.268	247.7	224.63	218.32	116.268	191.88	215.36	116.268	198.46	238.78	163.06	116.267	195.08	226.28	116.269	174.58	200.61	175.91	116.267
116.968	2.1	116.967	284.47	265.74	116.967	300.41	277.47	245.87	116.969	271.65	116.968	345.99	307.46	116.968	274.37	116.969	367.34	332.99	116.968	314.35	333.48	116.969	359.1	329.88	116.968	351.35	350.66	116.968	238.94	222.01	116.968	247.75	224.4	221.19	116.967	190.55	214.26	116.968	198.27	239.07	164.1	116.969	196.13	226.01	116.968	175.04	201.41	176.11	116.968
117.668	2.69	117.667	284.86	264.37	117.667	295.55	273.57	245.75	117.669	271.57	117.669	345.47	307.83	117.668	268.58	117.668	367.66	330.58	117.668	316.17	337.05	117.669	360.5	329.81	117.669	350.98	350.75	117.668	240.17	222.59	117.668	247.47	245.77	221.48	117.669	188.54	213.82	117.67	198.09	240.05	165.69	117.667	197.81	226.02	117.668	175.34	202.45	175.73	117.669
118.369	2.24	118.369	283.74	265.64	118.367	298.39	268.54	245.64	118.368	271.27	118.368	346.45	310.21	118.368	268.86	118.369	368.16	330.46	118.368	316.05	338.66	118.369	360.16	329.5	118.369	350.6	350.36	118.363	240.41	221.32	118.368	247.99	244.43	221.58	118.367	188.34	214.85	118.369	198.4	240.14	163.51	118.37	196.46	225.96	118.367	174.89	202.59	175.99	118.367
119.067	2.3	119.069	284.96	264.86	119.068	298.53	268.27	245.31	119.068	271.17	119.068	345.89	314.9	119.068	267.38	119.068	368.41	329.84	119.068	314.2	339.65	119.069	359.74	329.93	119.067	350.75	350.18	119.068	239.03	222.55	119.067	247.92	239.91	221.92	119.069	187.98	215.02	119.068	198.49	240.08	161.78	119.068	196.52	226.32	119.068	175.57	202.76	175.95	119.067
119.769	2.12	119.767	283.93	265.1	119.767	298.24	269.03	244.62	119.769	270.39	119.768	346.08	314.54	119.766	266.2	119.768	368.6	328.94	119.77	314.27	340.1	119.769	359.7	329.74	119.767	350.77	350.06	119.769	239.74	222.51	119.769	247.9	235.47	222.4	119.768	188.14	215.51	119.769	198.25	240.27	160.84	119.768	195.95	226.54	119.768	175.64	202.99	176.24	119.767
120.469	1.9	120.468	283.56	263.88	120.468	301.77	267.33	245.03	120.469	270.97	120.468	344.55	311.1	120.468	266.18	120.467	369.29	329.67	120.469	314.66	341.32	120.468	359.74	330.34	120.469	351.17	350.09	120.469	239.03	222.39	120.468	246.45	232.48	222.16	120.467	188.29	215.68	120.469	198.14	241	160.87	120.468	195.66	226.43	120.468	175.61	201.55	176.17	120.468
121.167	2.44	121.168	284.32	265.46	121.167	303.92	265.81	245.3	121.168	270.5	121.17	345.47	309.39	121.169	265.58	121.168	369.06	329.29	121.168	313.95	341.76	121.168	359.61	330.4	121.168	350.6	350.09	121.167	238.48	221.86	121.169	242.99	229.21	222.74	121.17	187.88	215.76	121.171	198.45	240.94	161.54	121.168	195.48	226.41	121.169	175.5	197.2	176	121.166
121.867	2.22	121.869	285.72	269.9	121.867	304.95	265.33	245.25	121.869	269.84	121.868	345.85	308.62	121.867	265.65	121.868	369.74	327.89	121.868	314.42	342.63	121.871	359.06	330.05	121.868	350.62	350.48	121.869	237.99	221.93	121.868	244.07	227.53	222.14	121.868	188.04	216.67	121.869	198.24	240.99	161.58	121.869	194.81	226.29	121.868	175.82	197.71	175.34	121.867
122.568	2	122.569	286.96	271.19	122.567	305.34	265.35	244.83	122.567	270.1	122.566	345.27	309.22	122.567	265.08	122.569	369.47	327.64	122.567	314.41	343.2	122.569	358.78	330.39	122.567	350.71	350.08	122.567	236.96	222	122.567	246.68	226.84	222	122.567	188.21	215.7	122.567	198.32	241.55	161.6	122.569	194.61	225.59	122.567	176	199.26	174.35	122.566
123.267	1.93	123.268	286.44	266.13	123.269	306.08	264.38	243.58	123.269	270.22	123.267	344.75	308.84	123.267	263.93	123.267	370.02	326.95	123.268	314.73	343.56	123.269	359.15	330.54	123.267	350.52	350.17	123.27	237.24	222.27	123.267	246.56	224.95	222.44	123.269	188.68	215.02	123.268	197.87	241.49	161.8	123.268	194.64	226.18	123.27	176.21	200.82	175.29	123.267
123.968	0.97	123.968	286.25	264.26	123.969	306.87	264.77	244.87	123.969	269.41	123.967	346.34	309.04	123.967	264.63	123.969	370.68	326.58	123.968	314.06	344	123.969	359.01	330.44	123.969	350.34	350.23	123.967	236.4	221.95	123.968	246.7	224.29	222.51	123.968	188.18	215.59	123.968	197.97	241.4	161.78	123.969	194.66	226.37	123.968	175.89	201.71	175.58	123.969
124.667	2.94	124.67	286.29	265.04	124.669	307.45	266.51	246.05	124.669	273.6	124.668	346.49	309.17	124.666	264.15	124.668	370.64	326.74	124.669	314.56	344.48	124.669	358.66	329.65	124.667	350.9	349.85	124.67	240.96	222.61	124.67	246.76	223.59	223.08	124.668	188.55	214.52	124.669	197.91	241.45	161.81	124.668	194.57	226.29	124.671	175.67	202.03	175.25	124.667
125.369	2.02	125.368	285.54	264.47	125.367	307.17	267.69	248.11	125.368	277.45	125.368	344.8	310.15	125.367	264.73	125.369	359	326.94	125.367	313.88	343.99	125.368	358.88	331.26	125.367	350.88	350.52	125.369	245.58	222.19	125.367	246.33	223.92	222.91	125.368	188.58	215.18	125.367	198.14	241.77	161.69	125.368	194.73	226.82	125.364	176.26	202.37	176.05	125.366
126.069	1.98	126.068	285	263.6	126.067	307.08	266.18	254.58	126.068	277.34	126.068	345.88	311.31	126.066	263.96	126.069	348.75	326.53	126.068	314.39	344.06	126.069	360.3	331.21	126.069	350.62	350.93	126.069	243.54	221.54	126.068	247	224.3	222.1	126.067	188.33	214.49	126.069	197.76	241.41	162.04	126.068	195.11	226.58	126.069	176.21	202.65	175.7	126.068
126.767	2.27	126.766	283.94	263.57	126.768	306.74	266.33	255.01	126.769	271.92	126.768	347.67	310.5	126.766	264.42	126.769	353.23	326.77	126.767	314.52	341.97	126.767	360.96	328.81	126.768	350.25	350.65	126.765	240.7	221.87	126.767	246.88	223.5	222.64	126.767	188.46	215.1	126.767	198.12	241.84	162.5	126.768	194.89	226.26	126.769	173.94	198.81	175.76	126.767
127.47	2.78	127.467	284.07	263.38	127.467	307.38	265.29	248.45	127.469	270.61	127.469	347.67	309.77	127.467	265.37	127.467	363.76	326.76	127.467	315.24	334.01	127.469	360.23	328.08	127.469	350.49	350.67	127.469	240.51	229.56	127.469	247.02	224	218.29	127.468	188.31	215.04	127.469	197.9	241.78	162.29	127.47	195.13	225.97	127.469	172.12	198.15	175.9	127.467
128.168	3.29	128.168	284.17	263.52	128.169	307.54	264.65	246.2	128.169	269.67	128.167	345.18	310.6	128.168	264.93	128.167	367.46	327.28	128.167	314.89	335.18	128.169	359.81	329.86	128.168	350.16	346.18	128.169	240.1	233.67	128.169	247.17	224.42	214.26	128.168	188.51	213.62	128.17	198.65	242.24	164.72	128.17	194.96	225.64	128.17	171.84	199.24	175.72	128.168
128.863	2.55	128.867	284.06	262.94	128.867	307.72	263.79	245.13	128.868	269.72	128.868	345.41	310.07	128.866	265.88	128.868	367.96	327.24	128.867	314.58	340.95	128.869	359.48	329.56	128.868	350.58	340.7	128.869	240.19	237.05	128.869	247.3	223.48	214.67	128.867	188.44	214.66	128.87	202.78	242.2	164.71	128.869	194.66	228.67	128.868	170.99	201.43	175.96	128.868
129.567	2.88	129.567	284.51	262.23	129.571	307.82	265.96	244.51	129.568	270.06	129.567	345.59	310.43	129.566	265.01	129.568	366.94	326.25	129.567	314.66	342.46	129.569	359.67	330.81	129.568	349.91	343.44	129.568	239.72	226.66	129.567	247.69	223.98	218.6	129.567	188.56	213.56	129.569	202.41	242.55	164.99	129.568	194.69	234.67	129.57	171.47	202.17	176.4	129.567
130.269	2.93	130.268	285.13	262.71	130.269	308.8	272.37	244.34	130.267	270.35	130.267	345.38	311.31	130.296	266.88	130.27	366.94	326.13	130.269	314.55	343.49	130.268	359.7	330.86	130.267	349.96	344.45	130.27	239.97	223.77	130.269	247.32	224.26	219.5	130.268	188.56	214.72	130.269	197.88	242.46	162.32	130.269	194.95	230.99	130.268	172.35	202.08	176.58	130.266
130.967	3.03	130.968	285.42	262.61	130.969	308.13	274.85	244.1	130.968	269.99	130.969	344.64	310.93	131.174	266.42	130.969	368.16	325.84	130.967	314.5	341.62	130.969	359.73	330.37	130.969	349.19	347.49	130.969	239.51	221.74	130.968	246.73	223.9	219.81	130.967	188.86	215.54	130.969	198.89	242.39	161.03	130.969	194.92	228.68	130.968	172.67	199.22	176.41	130.969
131.667	7.42	131.668	284.34	277.24	131.668	308.44	267.81	244.88	131.667	270.8	131.667	346.62	310.68	131.795	266.77	131.669	368.84	326.1	131.667	314.46	340.8	131.667	360.6	331.16	131.668	349.12	347.34	131.67	238.14	221.67	131.668	244.84	225.36	219.85	131.668	188.22	213.49	131.669	199.73	234.09	161.18	131.669	194.84	226.93	131.67	173.13	198.79	176.78	131.669
132.367	7.99	132.366	284.71	286.41	132.369	308.95	267.38	245.65	132.367	270.72	132.369	365.44	310.49	132.415	266.05	132.369	368.35	325.58	132.368	314.62	338.42	132.37	360.25	331.95	132.369	349.6	349.33	132.37	238.11	221.77	132.368	242.84	225.33	220.65	132.369	188.25	213.12	132.367	199.66	226.18	160.9	132.369	194.97	225.84	132.369	173.87	201.13	176.05	132.368
133.067	16.5	133.067	283.68	282.84	133.068	309.19	266.26	252.01	133.067	270.68	133.067	352.75	311.06	133.068	266.07	133.069	368.68	326.52	133.066	313.55	341.2	133.068	360.06	330.65	133.068	348.93	350.42	133.068	238.19	221.9	133.068	240.12	224.75	221.13	133.069	188.86	214.53	133.069	199.61	228.35	161.67	133.067	194.68	225.44	133.069	174.14	202.17	176.4	133.068
133.768	15.69	133.768	283.45	286.65	133.768	309.24	265.57	257.64	133.767	270.94	133.768	344.34	310.52	133.767	267.04	133.769	369.04	326.55	133.767	313.63	342.65	133.77	359.01	331.22	133.767	348.9	349.63	133.768	237.66	221.21	133.768	244.4	225.22	221.45	133.769	188.85	213.59	133.768	199.12	234.61	161.73	133.768	195.05	225.99	133.767	174.1	202.01	175.89	133.769
134.467	10.05	134.467	282.64	274.87	134.468	309.89	266.33	252.87	134.467	271.18	134.467	345.17	310.24	134.467	266.67	134.469	368.52	325.06	134.467	314.85	343.26	134.469	358.96	330.99	134.467	348.07	350.06	134.469	237.51	221.43	134.468	246.04	224.06	221.3	134.469	189.6	213.2	134.468	198.87	236.72	161.76	134.469	198.16	225.83	134.47	174.62	202.35	176.03	134.469
135.168	7.61	135.167	284.99	273.05	135.166	309.7	265.89	248.21	135.167	271.41	135.169	344.83	310.7	135.167	267.03	135.169	369.1	324.59	135.168	314.37	343.59	135.169	359.58	330.47	135.169	341.27	349.99	135.17	237.1	221.69	135.169	245.23	239.18	219	135.169	189.64	214.07	135.169	198.57	237.14	161.33	135.168	197.05	225.5	135.168	174.72	202.92	176.48	135.167
135.868	7.15	135.867	284.44	269.95	135.868	310.34	265.88	247.33	135.867	270.66	135.867	345.43	309.52	135.867	266.97	135.869	369.25	324.52	135.866	314.03	343.63	135.868	359.34	330.05	135.867	333.94	349.62	135.869	237.22	221.44	135.868	245.39	241.77	219.17	135.869	190.24	212.99	135.868	198.09	237.62	161.38	135.868	197.3	225.91	135.868	174.65	203.11	176.37	135.867
136.568	13.31	136.567	293.46	268.17	136.568	310.36	265.74	246.03	136.569	271.01	136.567	344.51	309.67	136.567	267.25	136.568	369.78	324.2	136.567	312.49	343.71	136.57	359.15	330.56	136.567	336.98	349.92	136.57	236.35	221.77	136.568	245.72	235.94	220.59	136.568	189.83	213.91	136.568	198.17	238.19	161.5	136.568	195.86	225.62	136.569	174.9	203.14	175.93	136.567
137.268	9.93	137.267	298.18	267	137.266	309.86	266.35	245.63	137.268	270.79	137.267	344.77	310.52	137.267	290.08	137.268	370.89	324.73	137.267	311.83	344.3	137.269	358.87	330.33	137.268	346.56	350.28	137.27	236.44	222.2	137.269	246.06	236.83	220.39	137.27	189.34	212.17	137.268	198.33	237.84	161.51	137.268	195.44	226	137.269	175.01	203.27	174.98	137.268
137.969	7.73	137.969	291.16	265.98	137.969	310.02	265.83	245.78	137.968	272.16	137.97	344.58	310.16	137.968	291.36	137.969	371.12	325.54	137.968	312.71	344.77	137.968	359.14	330.05	137.969	346.37	350.07	137.97	236.08	221.52	137.969	246.01	232.37	221.31	137.969	189.14	212.75	137.968	198.05	238.5	161.51	137.968	195.22	226.07	137.968	175.15	203	172.74	137.969
138.667	3.41	138.669	286.63	265.37	138.67	310.35	267.81	245.53	138.668	276.89	138.667	345.02	310.74	138.667	289.13	138.669	369.72	325.58	138.669	312.36	344.9	138.668	358.65	329.61	138.668	350.39	349.84	138.668	236.55	221.47	138.669	246.01	229.79	221.53	138.67	189.03	212.7	138.669	198.12	238.98	161.88	138.668	195.23	225.77	138.67	175.3	203.38	171.58	138.669
139.368	3.51	139.368	285.94	265.59	139.368	310.14	273.13	244.95	139.368	279.36	139.369	344.48	310.1	139.368	278.68	139.367	369.87	324.53	139.367	312.29	345.15	139.37	359.6	329.29	139.367	350.99	350.37	139.364	235.44	221.28	139.369	246.07	228.58	221.75	139.37	188.77	212.93	139.369	198.41	239.58	162.05	139.368	194.89	226.1	139.369	175.36	203.24	172.52	139.369
140.068	3.69	140.067	284.33	264.29	140.066	310.87	272.93	245.33	140.067	279.53	140.069	346.04	309.92	140.066	269.71	140.068	369.65	324.3	140.067	313.11	344.76	140.07	359.5	330.5	140.067	351.04	349.81	140.067	238.44	221.25	140.067	247.26	226.34	222.02	140.068	189	212.6	140.068	200.48	239.87	162.03	140.069	195.09	226.08	140.069	175.36	203.31	174.2	140.067
140.769	2.9	140.767	284.42	263.82	140.768	310.72	269.63	244.91	140.768	275.48	140.767	346.45	310.02	140.768	267.47	140.768	369.38	325.24	140.767	313.56	344.19	140.768	359.73	330.05	140.766	351.04	349.63	140.769	245.78	222	140.767	247.1	223.33	222.03	140.77	188.92	214	140.77	202.17	240.09	161.81	140.768	194.98	225.79	140.769	175.28	203.14	174.23	140.768
141.469	1.81	141.467	284.52	263.76	141.468	310.7	268.23	244.91	141.468	271.58	141.47	346.36	310.17	141.468	266.56	141.468	369.63	327.1	141.469	315.53	343.03	141.468	359.66	330.63	141.468	352.14	350.04	141.469	248.06	221.46	141.468	246.55	223.04	219.21	141.47	188.94	212.29	141.469	201.26	239.89	163.98	141.468	194.92	226.14	141.469	175.31	203.25	174.17	141.469
142.167	2.79	142.167	283.64	263.68	142.17	311.23	267.94	244.71	142.169	271.62	142.17	347.45	309.89	142.168	265.69	142.168	369.74	326.87	142.168	317.89	344.5	142.169	359.59	330.47	142.168	352.73	349.7	142.168	244.71	221.99	142.168	246.52	223.61	219.24	142.169	188.65	213.3	142.17	199.68	240.86	164.81	142.17	194.79	225.88	142.169	175.62	203.54	175.28	142.169
142.867	1.95	142.867	284.61	263.98	142.869	311.08	268.02	245.5	142.868	271.13	142.868	347.38	309.53	142.868	264.68	142.868	370.45	326.65	142.869	316.65	344.8	142.87	359.43	330.51	142.867	352.72	349.77	142.864	241.53	221.98	142.867	247.1	223.48	219.67	142.869	188.81	212.02	142.87	199.56	240.73	165.06	142.868	195.13	225.95	142.869	175.66	203.3	175.37	142.87
143.567	3.11	143.567	283.75	264.56	143.569	311.22	267.73	244.81	143.568	270.06	143.568	345.34	309.94	143.566	265.01	143.568	370.74	325.44	143.567	315.2	344.28	143.569	359.31	330.31	143.566	352.55	349.2	143.567	240.49	222.42	143.567	247.45	223.56	221.29	143.57	188.86	212.03	143.568	198.48	241.24	162.3	143.568	195.37	225.92	143.57	175.36	203.37	175.61	143.568
144.268	2.59	144.268	284.04	272.94	144.268	311.04	268.03	245.41	144.268	270.76	144.269	345.11	309.3	144.266	265.52	144.269	369.9	325.07	144.267	313.18	344.66	144.269	358.82	331.53	144.268	352.84	350.76	144.267	241.41	221.49	144.267	246.59	223.57	221.22	144.27	188.89	212.92	144.268	198.15	241.16	161.15	144.268	195.45	225.86	144.269	173.1	203.81	175.52	144.269
144.968	2.89	144.968	284.16	282.95	144.968	311.41	268.65	244.72	144.968	270.57	144.968	346.98	309.28	144.966	265.06	144.967	370.79	324.81	144.969	312.84	344.29	144.967	358.65	330.17	144.968	352.94	349.99	144.968	240.34	221.85	144.967	247.2	222.38	221.66	144.968	188.79	214.24	144.967	197.76	241.24	161.35	144.968	195.34	225.81	144.968	171.64	203.73	176.16	144.969
145.669	3.5	145.667	285.64	290.38	145.67	310.8	266.82	245.59	145.668	270.09	145.669	346.34	309.5	145.666	265.02	145.667	371.49	324.95	145.668	313.56	344.27	145.669	357.97	329.69	145.669	353.06	349.68	145.668	240.55	221.47	145.668	246.49	224.62	221.88	145.668	188.87	212.31	145.668	197.92	241.32	161.18	145.667	195.11	225.9	145.669	170.81	203.4	175.8	145.667
146.363	2.82	146.368	285.61	275.08	146.368	309.23	266.19	245.41	146.367	270.15	146.368	348.63	309.66	146.367	266.34	146.368	371.18	324.14	146.369	312.2	344.07	146.368	348.92	331.32	146.366	352.94	350.02	146.369	239.84	224.95	146.368	246.35	224.29	222.16	146.368	188.41	214.02	146.368	198.27	241.5	161.47	146.367	195.1	225.4	146.369	170.23	202.88	175.72	146.367
147.067	2.84	147.069	284.34	272.44	147.07	306.42	265.84	244.76	147.069	270.57	147.069	349.96	310.35	147.067	265.07	147.067	369.62	324.12	147.066	312.32	343.72	147.068	350.73	331.87	147.067	353.15	350.6	147.07	239.88	233.91	147.068	247.09	224.17	222.31	147.068	188.67	225.6	147.068	197.93	241.89	161.64	147.067	195.06	232.28	147.069	170.91	203.3	176.07	147.068
147.767	3.58	147.767	284.22	269.35	147.769	306.37	265.43	245.58	147.768	270.51	147.769	347.68	310.16	147.767	264.56	147.768	369.47	323.86	147.768	312.4	344.56	147.768	352.58	331.32	147.767	352.31	349.69	147.768	238.79	235.29	147.767	247.17	223.04	222.16	147.769	188.4	240.59	147.768	197.95	241.99	161.63	147.769	195.3	232.82	147.769	171.46	199.56	175.43	147.768
148.469	4.3	148.467	284.35	268.1	148.47	308.23	265.58	245.62	148.468	269.95	148.47	348.59	310.8	148.467	265.02	148.47	369.78	326.43	148.467	313.9	344.4	148.469	353.57	331.45	148.467	351.99	349.21	148.468	238.62	228.36	148.468	246.37	223.11	222.31	148.468	188.29	230.51	148.468	198.04	242.02	161.57	148.469	195.26	230.79	148.468	172.3	198.82	173.85	148.469
149.167	24.45	149.167	283.55	266.84	149.169	309.35	264.97	244.58	149.168	270.11	149.168	348.11	310.45	149.167	264.77	149.169	369.09	338.19	149.167	313.92	344.63	149.168	356.05	331.54	149.168	352.2	348.71	149.168	238.78	223.64	149.168	241.9	222.89	222.21	149.169	188.18	226.14	149.169	197.97	242.17	161.37	149.167	194.82	227.93	149.169	172.74	197.81	173.7	149.168
149.868	31	149.868	284.16	267.03	149.868	308.93	264.81	245.77	149.867	269.78	149.869	348.15	314.39	149.867	266.41	149.869	369.81	338.26	149.867	313.12	345.7	149.868	356.9	330.83	149.868	351.7	349.39	149.864	238.06	222.24	149.867	239.66	223.8	222.72	149.867	188.32	224.08	149.869	198.05	242.31	161.55	149.87	195	226.04	149.868	172.77	196.64	174.45	149.869
150.567	27.97	150.568	283.79	266.8	150.57	309.59	264.8	244.33	150.568	270.42	150.568	347.71	321.3	150.567	267.24	150.568	370.59	335.47	150.567	311.9	345.76	150.568	349.98	331.14	150.57	352.16	349.46	150.567	237.19	221.79	150.567	239.19	223.73	222.33	150.569	188.15	221.51	150.568	197.83	242.48	161.51	150.57	195.26	224.97	150.569	173.6	198.26	174.4	150.569
151.267	24.63	151.269	283.63	265.85	151.268	309.26	269.57	244.02	151.267	270.39	151.269	348.72	323.22	151.267	268	151.27	370.34	332.83	151.267	311.85	344.64	151.268	350.12	330.35	151.27	352.11	347.89	151.269	236.86	222.25	151.267	242.39	222.78	222.36	151.267	187.83	217.85	151.268	198.24	242.27	161.57	151.269	195.22	225.05	151.268	173.81	198.74	174.8	151.269
151.968	19.01	151.968	284.71	267.77	151.969	309.66	269.81	244.42	151.968	270.23	151.968	349.92	320.96	151.967	267.24	151.969	370.26	329.82	151.967	312.98	344.3	151.968	354.91	331.53	151.97	352.16	348.62	151.969	236.59	222.15	151.968	244.57	223.16	222.67	151.969	188.29	216.13	151.967	197.6	242.05	161.9	151.968	195.38	225.26	151.968	173.89	199.17	174.46	151.97
152.666	14.5	152.667	292.41	287.11	152.668	309.68	266.41	247.74	152.667	270.54	152.668	349.67	315.87	152.666	267.19	152.669	369.4	327.12	152.668	313.86	334.86	152.668	357.17	316.83	152.669	352.09	348.72	152.67	235.64	221.98	152.669	244.88	221.89	221.88	152.669	187.7	216.4	152.667	197.82	242.2	161.83	152.668	195.32	224.92	152.668	174.51	199.96	174.5	152.668
153.364	12.02	153.368	298.17	285.74	153.369	309.8	266.57	251.12	153.368	270.48	153.368	350	310.74	153.366	266.63	153.369	367.55	326.29	153.368	312.86	329.64	153.368	358.24	309.16	153.368	351.94	349.13	153.365	236.9	222.16	153.368	245.4	222.16	218.86	153.368	187.88	215.73	153.369	198.01	242.22	161.7	153.368	195.07	224.76	153.368	174.66	200.45	174.78	153.369
154.066	8.38	154.067	291.44	285.08	154.068	309.46	265.04	250.07	154.068	270.87	154.068	349.01	308.53	154.067	266.61	154.069	363.75	326.87	154.067	312.81	324.66	154.068	359.94	311.52	154.069	351.62	348.64	154.069	238.35	221.86	154.068	242.87	222.38	215.31	154.069	193.06	216.76	154.069	197.62	242.19	161.77	154.068	194.85	224.71	154.068	174.62	201	175.42	154.069
154.767	7.39	154.768	287.78	276.95	154.769	310.18	264.85	247.11	154.768	271.42	154.768	347.27	307.65	154.767	265.77	154.769	366.08	326.96	154.767	312.49	324.22	154.767	359.77	320.94	154.768	351.64	348.95	154.769	247.07	221.96	154.768	244.02	223.16	217.64	154.77	193.86	216.22	154.769	198.04	241.31	161.48	154.768	194.99	225.13	154.768	174.54	200.23	175.16	154.768
155.467	6.32	155.467	286.44	272.7	155.469	309.77	265.81	245.34	155.467	275.18	155.469	345.94	306.8	155.467	267.04	155.469	368.44	327.2	155.468	312.58	326.56	155.469	360.35	325.93	155.465	351.41	349.42	155.468	245.71	222.33	155.468	245.4	224.51	217.94	155.467	195.23	216.5	155.467	199.81	229.02	161.69	155.467	194.96	225.3	155.469	174.93	198.53	175.26	155.469
156.167	6.57	156.168	284.89	269.16	156.169	309.97	269.83	244.02	156.169	279.65	156.168	347.67	309.17	156.167	266.01	156.169	368.1	326.98	156.168	312.29	328.16	156.167	360.87	328.64	156.168	350.51	349.15	156.169	239.63	222.23	156.17	245.84	223.66	219.43	156.169	194.06	215.53	156.168	202.3	225.2	161.82	156.168	195.42	225.27	156.169	174.79	199.33	175.26	156.169
156.867	5.88	156.868	284.87	268.15	156.867	310.18	272.3	244.48	156.868	276.03	156.868	348.57	310.87	156.867	266.13	156.871	368.18	326.04	156.867	314.35	329.72	156.869	361.11	329.39	156.868	350.65	349.79	156.869	238.59	221.96	156.868	246.12	222.53	219.7	156.868	190.95	214.67	156.868	199.7	230.6	161.81	156.867	194.96	225.58	156.864	174.98	200.7	174.8	156.863
157.568	5.68	157.568	284.76	266.88	157.569	311.57	267.53	244.28	157.568	273.36	157.57	349.96	312.99	157.567	266.51	157.568	368.5	327.01	157.568	314.39	334.07	157.568	361.31	329.84	157.57	351	350.08	157.569	238.73	222.71	157.569	245.55	228.32	220.36	157.568	188.92	214.86	157.569	197.93	235.77	162.47	157.568	197.13	225.89	157.568	175.05	201.17	175.24	157.567
158.268	5.33	158.268	284	266.74	158.267	311.98	266.41	244.98	158.267	271.45	158.268	349.58	312.22	158.266	267.01	158.267	368.57	326.18	158.267	313.24	336.88	158.269	361.99	330.78	158.268	350.78	350.05	158.269	238.69	222.35	158.267	245.86	230.87	219.99	158.267	188.23	214.57	158.269	198.87	236.47	164.04	158.268	196.73	225.54	158.268	174.99	201.22	175.73	158.269
158.968	4.7	158.97	283.12	265.99	158.968	312.65	266.62	245.01	158.967	272.02	158.969	349.04	309	158.967	266.64	158.967	368.64	326.68	158.967	312.42	339.61	158.968	362.11	330.92	158.97	350.45	349.65	158.967	238.72	222.24	158.969	246.54	227.08	220.81	158.969	187.19	215.14	158.969	198.26	237.43	164.81	158.968	196.46	225.46	158.969	172.59	201.35	174.49	158.969
159.669	4.27	159.668	283.98	264.91	159.668	311.34	266.57	244	159.667	271.34	159.669	347.81	308.41	159.668	266.53	159.669	368.2	326.65	159.668	313.59	341.44	159.669	362.69	330.25	159.669	350.3	349.66	159.665	238.17	221.97	159.668	246.31	231.55	221.36	159.668	187.76	215.34	159.669	198.51	237.63	163.7	159.668	195.86	225.33	159.669	171.12	201.53	173.26	159.669
160.369	4.51	160.369	283.16	264.75	160.367	310.97	265.89	244.05	160.368	271.78	160.368	349.37	308.09	160.368	266.55	160.367	368.34	326.74	160.368	313.05	342.88	160.369	362.46	329.76	160.367	349.65	349.64	160.365	237.45	222.66	160.366	246.39	235.33	221.73	160.369	187.85	214.31	160.367	198.13	238.07	161.96	160.369	195.45	225.04	160.364	172.04	202.21	173.12	160.366
161.069	3.97	161.069	283.82	264.16	161.069	310.97	266.05	243.79	161.068	272.31	161.068	348.98	308.08	161.067	267.48	161.068	368.15	326.83	161.068	312.08	343.02	161.069	361.9	330.35	161.066	349.31	349.51	161.064	237.39	223.94	161.066	246.62	229.9	222.31	161.069	187.97	215.14	161.068	197.77	238.04	160.79	161.067	195.41	225.15	161.069	171.83	202.58	173.98	161.068
161.768	3.65	161.769	283.95	264.3	161.767	311.13	268.52	243.3	161.767	271.61	161.769	348.78	308.41	161.767	265.52	161.768	367.84	326.09	161.769	312.85	344.15	161.767	362.11	331.01	161.768	349.9	349.85	161.77	236.61	233.22	161.768	245.26	225.92	222.24	161.769	188.33	215.02	161.769	197.94	238.26	160.72	161.768	195.15	225.36	161.769	172.46	202.2	174.63	161.768
162.469	3.84	162.469	284.7	263.52	162.47	311.75	270.8	243.12	162.467	271.72	162.47	348	308.31	162.467	264.35	162.469	368.02	326.22	162.469	313.82	345.1	162.468	361.47	330.9	162.468	350.01	350.09	162.469	235.99	236.09	162.47	243.89	224.61	222.79	162.469	187.94	215.28	162.468	197.93	238.42	160.93	162.469	194.81	225.7	162.469	172.75	198.37	174.76	162.468
163.169	3.1	163.169	284.22	263.21	163.168	312.03	270.08	243.8	163.168	271.43	163.169	349.03	308.67	163.169	264.11	163.168	366.75	326.68	163.17	314.01	345.56	163.168	361.91	331.12	163.169	350.02	350.01	163.169	237.44	227.12	163.167	243.33	223.54	222.99	163.169	188.46	213.73	163.168	198.33	238.66	161.33	163.167	194.44	225.57	163.165	172.93	196.73	175.08	163.168
163.869	4.43	163.869	284.16	263.23	163.869	311.1	267.84	243.54	163.869	271.27	163.869	349.44	308.72	163.867	265.54	163.869	367.55	327.67	163.869	311.66	345.77	163.869	361.8	331.61	163.869	349.24	349.95	163.864	236.04	222.66	163.868	245.38	223.05	223.13	163.869	188.16	213.84	163.868	198.02	238.8	161.67	163.869	194.91	225.72	163.869	173.49	196.6	174.77	163.869
164.569	4.46	164.569	286.28	263.79	164.568	312.01	267.11	243.64	164.569	271.07	164.569	347.72	309.13	164.567	265.95	164.569	366.66	327.66	164.57	310.77	346.47	164.57	362.21	331.59	164.568	348.52	349.45	164.564	236.4	222.83	164.568	246.56	222.49	222.61	164.568	187.98	214.14	164.569	198.01	239.74	161.49	164.567	194.76	225.27	164.569	173.73	197.93	174.69	164.567
165.268	3.61	165.27	284.51	264.06	165.269	312.34	267.63	243.92	165.268	270.85	165.267	347.84	308.79	165.266	266.76	165.269	362.75	326.57	165.27	312.01	346.11	165.267	361.61	331.08	165.268	335.56	350.69	165.268	245.27	221.55	165.268	246.28	221.65	222.38	165.269	188.47	213.04	165.269	197.83	239.65	161.67	165.267	194.79	225.56	165.269	173.74	199.43	174.94	165.268
165.97	4.37	165.97	284.68	263.06	165.969	312.46	266.62	243.36	165.969	271.88	165.967	349.31	308.5	165.967	266.97	165.969	346.28	326.7	165.968	312.71	346.95	165.969	357.97	330.93	165.969	340.31	350.38	165.968	245.99	221.44	165.969	246.12	221.85	222.96	165.968	188.73	213.67	165.969	198.38	239.65	161.67	165.969	194.79	225.56	165.964	174.08	200.71	175.23	165.968
166.669	8.14	166.669	284.35	262.72	166.669	312.91	266.33	243.43	166.668	276.46	166.667	346.26	309.25	166.667	264.79	166.669	347.75	326.34	166.669	312.39	347.32	166.669	353.47	328.81	166.669	350.31	350.69	166.668	239.35	221.89	166.668	243.25	221.85	222.68	166.669	188.59	214.43	166.67	198.27	240.38	161.85	166.668	194.51	225.53	166.668	174.09	201.08	175.19	166.667
167.368	15.61	167.37	285.06	262.46	167.367	312.52	265.66	242.69	167.369	277.28	167.367	349.22	309.46	167.365	264.92	167.368	353.46	325	167.367	312.8	347.96	167.369	354.92	319.97	167.367	349.91	350.93	167.363	238.02	221.67	167.368	241.14	222.83	222.78	167.367	188.52	213.68	167.369	199.88	240.5	161.69	167.369	194.62	225.82	167.37	174.6	201.19	175.02	167.367
168.069	16.27	168.068	286.21	263.01	168.069	313.37	266.79	241.8	168.069	276.96	168.067	350.3	309.71	168.065	263.98	168.068	361.55	326.56	168.069	312.77	347.25	168.067	357.83	321.17	168.067	353.34	350.92	168.068	239.55	221.12	168.068	238.51	223.11	223.04	168.069	188.45	212.64	168.07	201.48	240.63	161.66	168.068	194.2	225.42	168.069	174.66	201.68	174.89	168.067
168.769	12.5	168.77	285.03	264.65	168.769	313.28	276.11	242.49	168.768	276.69	168.768	348.4	309.42	168.765	263.75	168.769	364.07	326.39	168.769	327.27	347.38	168.768	359.05	326.1	168.767	351.41	345.91	168.767	239.52	221.96	168.768	242	222.3	222.57	168.768	188.08	213.66	168.769	199.97	240.57	161.59	168.768	194.73	225.55	168.769	174.56	202	174.77	168.769
169.469	10.87	169.468	284.32	266.2	169.469	312.46	281.74	242.46	169.469	273.92	169.468	347.43	311.03	169.468	264.22	169.468	364.64	326.1	169.468	344.64	347.26	169.467	361.42	329.32	169.469	352.4	340.48	169.468	239.27	220.99	169.468	243.33	222.57	222.67	169.468	188.03	212.51	169.469	198.14	238.06	161.78	169.469	194.85	225.35	169.469	174.41	202.26	174.91	169.468
170.169	7.42	170.168	285	263.8	170.169	306.54	277.38	242.74	170.168	272.59	170.168	382.08	311	170.166	265.17	170.168	365.96	325.21	170.168	354.5	346.87	170.167	360.74	330.85	170.169	352.74	339.35	170.168	238.7	222.24	170.17	244.53	221.48	216.86	170.169	188.04	213.01	170.169	198.64	226.54	162.03	170.168	194.81	225.42	170.163	172.74	201.05	174.7	170.168
170.868	5.79	170.867	283.36	264.3	170.869	298.83	271.71	242.5	170.87	272.07	170.867	413.01	315	170.867	264.18	170.868	367.55	324.99	170.868	346.98	346.81	170.869	360.65	330.49	170.868	353.22	337.97	170.864	237.66	221.56	170.868	244.8	221.05	215.6	170.867	187.99	214.24	170.869	199.06	226.69	162.14	170.869	194.36	225.45	170.868	171.91	202.2	174.6	170.869
171.568	4.36	171.567	284.21	262.93	171.569	299.19	269.94	241.71	171.568	271.22	171.569	404.87	316.39	171.566	263.37	171.57	369.05	325.07	171.568	326.26	346.88	171.567	361.52	330.19	171.567	353.02	340.45	171.568	237.3	222.04	171.568	245.13	222.17	218.26	171.567	188.02	212.32	171.568	198.45	232.31	161.73	171.569	194.7	225.37	171.569	171.4	202.41	174.55	171.569
172.267	5.14	172.268	284.48	263.37	172.269	299.48	266.78	242.09	172.268	270.29	172.268	388.16	314.06	172.266	264.47	172.268	367.43	325.28	172.268	317.06	347.02	172.267	362.09	330.19	172.267	353.19	345.56	172.268	237.69	221.69	172.268	245.01	223.46	219.66	172.268	188.18	220.22	172.269	198.04	236.39	161.53	172.27	194.92	225.22	172.268	170.6	202.97	174.57	172.269
172.969	5.36	172.969	284.65	264.21	172.97	299.88	266.5	242.33	172.968	270.63	172.968	362.36	310.29	172.966	262.51	172.969	365.78	324.79	172.968	314.4	347.67	172.967	361.75	330.63	172.969	353.43	345.94	172.969	238.83	222.03	172.968	245.86	223.87	220.38	172.968	188.3	224.66	172.97	198.16	236.6	161.75	172.969	195.85	225.32	172.968	170.41	202.78	174.75	172.969
173.669	4.42	173.669	285.43	264.33	173.668	301.69	266.44	242.27	173.669	270.62	173.669	352.85	308.62	173.666	262.79	173.669	365.95	324.18	173.667	315.32	347.74	173.668	363.19	330.18	173.668	353.18	346.67	173.669	245.49	221.91	173.668	246.16	222.95	220.65	173.667	188.36	227.68	173.669	198.01	237.1	161.57	173.669	197.43	225.15	173.664	171.26	202.92	175.19	173.668
174.367	4.29	174.369	286	270.34	174.367	303.54	267.33	241.95	174.369	270.7	174.369	350.29	308.1	174.366	262.08	174.368	366.27	324.41	174.367	314.32	347.02	174.368	363.18	330.28	174.369	353.76	346.96	174.364	242.21	221.63	174.369	246.2	225.58	221.51	174.367	188.46	223.37	174.369	197.95	237.84	162.57	174.368	195.88	224.86	174.368	172.24	202.95	173.58	174.368
175.069	2.7	175.068	287.16	287.18	175.069	304.66	266.02	241.72	175.068	270.57	175.069	350.71	308.94	175.066	263.38	175.069	366.43	324.22	175.068	315.37	347.22	175.068	363.17	330.44	175.068	353.55	347.29	175.068	238.73	223.49	175.069	246.61	225.23	222.09	175.068	188.52	219.43	175.069	197.85	237.98	163.26	175.067	196.23	224.8	175.068	172.55	203.34	171.73	175.068
175.768	3.34	175.768	285.95	283.96	175.767	305.32	266.89	249.1	175.768	270.53	175.767	350.08	308.46	175.766	264.69	175.769	366.69	324.83	175.767	315.06	347.73	175.769	363.29	330.46	175.768	353.43	347.55	175.768	239.32	227.86	175.768	246.92	223.68	222.26	175.768	188.42	220.23	175.769	197.99	237.97	163.59	175.769	195.68	224.33	175.768	172.66	202.84	172.92	175.767
176.469	3.35	176.469	285.32	286.7	176.469	306.49	266.42	257.05	176.468	270.62	176.469	349.16	310.96	176.467	264.27	176.469	366.16	325.01	176.468	314.44	348.36	176.467	363.3	329.67	176.469	353.83	348.16	176.468	238.62	224.54	176.47	246.08	222.9	222.26	176.469	188.57	217.08	176.47	197.48	238.25	162.39	176.469	195.51	224.38	176.469	172.97	202.28	174.1	176.469
177.167	3.32	177.168	285.18	276.38	177.167	307.36	268.9	258	177.169	270.45	177.169	349.02	314.71	177.167	264.74	177.17	367.48	324.96	177.168	313.77	348.1	177.169	363.8	330.72	177.168	353.21	348.23	177.169	238.1	220.71	177.17	242.93	223.16	222.53	177.169	192.76	214.64	177.169	197.66	238.4	160.69	177.168	195.06	224.67	177.165	173.26	201.47	174.22	177.168
177.868	3.51	177.867	284.67	273.74	177.867	308.08	269.06	252.07	177.868	270.16	177.869	348.22	313.88	177.867	264.94	177.867	368.16	323.85	177.868	313.39	348.47	177.87	364.02	330.49	177.868	353.32	349.02	177.864	237.44	221.72	177.87	244.39	223.58	222.35	177.867	194.47	213.52	177.869	197.72	238.96	160.29	177.869	194.73	225.01	177.867	173.35	201.74	174.38	177.868
178.568	4.2	178.567	285.29	270.06	178.57	308.19	267.69	247.13	178.568	270.1	178.569	348.7	312.64	178.567	264.22	178.568	368.7	325.53	178.569	313.81	347.2	178.569	363.71	329.72	178.568	353.16	348.84	178.568	237.51	221.64	178.57	245.81	222.81	222.34	178.567	194.83	215.43	178.57	197.75	238.97	160.26	178.568	194.66	229.93	178.569	173.84	201.93	174.52	178.568
179.268	4.97	179.267	284	268.72	179.268	309.06	266.73	245.54	179.269	270.24	179.269	349.5	310.07	179.267	263.69	179.27	368.39	325.76	179.268	313.55	346.37	179.268	363.32	330.06	179.268	352.37	348.63	179.267	237.68	221.85	179.268	245.81	222.55	222.32	179.268	192.31	213.41	179.269	198.03	239.28	160.55	179.268	194.27	235.4	179.263	173.68	203.24	175.04	179.268
179.968	5.8	179.968	284.29	268.11	179.97	309.73	265.82	246.03	179.968	270.42	179.969	348.66	309.23	179.967	264.22	179.968	368.76	325.35	179.967	313.6	346.06	179.969	362.68	330.7	179.968	352.4	349.43	179.969	236.83	221.83	179.969	246.41	222.33	222.38	179.968	190.34	214.47	179.969	197.87	240.01	161.3	179.97	194.34	234.09	179.968	173.98	203.06	174.59	179.969
180.668	6.34	180.668	283.35	265.59	180.668	309.29	264.41	243.91	180.669	270.76	180.669	346.97	309.16	180.667	264.61	180.668	367.97	326	180.668	313.66	346.96	180.67	363.32	330.66	180.669	352.19	349.93	180.669	237.08	221.96	180.669	245.91	222.61	222.78	180.668	189.52	214.02	180.669	197.72	239.97	160.94	180.668	194.32	230.61	180.668	174.05	203.24	174.51	180.667
181.364	4.84	181.367	284.14	266.68	181.367	310.37	268.51	243.28	181.369	271.2	181.369	347.43	309.49	181.368	263.14	181.368	367.64	326.46	181.367	314.62	347.4	181.369	362.85	330.25	181.367	352.48	350.1	181.363	237.19	222.31	181.369	245.99	232.41	222.59	181.368	188.18	212.8	181.371	198.45	240.35	160.83	181.368	194.43	227.24	181.368	173.91	202.79	174.96	181.368
182.068	3.71	182.068	284.05	265.3	182.069	310.28	270.07	243.8	182.069	271.36	182.069	344.74	309.52	182.067	263.53	182.07	367.96	324.45	182.069	314.61	346.75	182.069	362.97	329.88	182.069	351.72	350.39	182.068	248.18	223.3	182.069	243.33	244.65	222.44	182.069	188.88	213.68	182.07	202.09	240.5	161.27	182.068	194.41	226.13	182.068	174.06	202.85	174.62	182.067
182.769	3.47	182.767	283.49	264.03	182.765	310.51	270.2	243.34	182.767	271.24	182.769	370.54	309.06	182.766	262.52	182.768	368.92	324.46	182.768	314.36	346.45	182.769	363.2	330.56	182.768	351.62	349.65	182.767	246.42	234.98	182.767	244.04	243.01	222.58	182.768	188.18	212.48	182.769	199.51	240.82	160.67	182.769	194.5	225.31	182.768	174.01	198.57	174.88	182.766
183.468	3.83	183.468	281.95	263.97	183.469	311.24	268.05	243.58	183.469	271.26	183.469	372.3	309.32	183.466	263.18	183.468	368.58	324.64	183.468	313.51	346.72	183.468	363.57	330.43	183.468	351.07	350.05	183.468	239.66	237.6	183.469	246.45	238.52	222.47	183.468	188.21	213.62	183.47	198.17	240.75	161.18	183.467	194.33	224.66	183.469	173.99	196.97	174.48	183.468
184.167	3.21	184.168	281.32	264.91	184.168	311.01	268.04	242.17	184.169	271.81	184.168	352.98	308.9	184.168	263.97	184.167	368.9	324.66	184.169	314.79	348.27	184.17	363.19	329.94	184.168	351.62	350.31	184.168	240.74	227.08	184.169	246.16	235.58	219.77	184.169	188.25	212.94	184.171	198.79	240.76	161.28	184.17	194.29	224.25	184.168	174.33	196.05	174.66	184.166
184.867	5.47	184.867	282.49	266.28	184.869	312.06	267.75	242.29	184.868	271.79	184.869	348.65	308.99	184.866	263.98	184.867	366.66	324.27	184.867	315.33	347.91	184.869	362.49	330.05	184.868	350.65	350.22	184.863	240.16	223.73	184.868	246.07	230.96	215.45	184.869	188.34	213.61	184.87	198.2	231.97	161.63	184.868	194.57	224.24	184.869	174.12	195.95	174.63	184.868
185.567	7.03	185.567	283.56	266.39	185.569	311.97	267.46	242.41	185.569	271.88	185.568	350.47	309.45	185.567	263.68	185.568	351.57	324.8	185.57	314.58	348.57	185.569	362.73	330.26	185.567	350.12	349.92	185.568	239.02	222.53	185.568	245.92	226.75	216.34	185.567	188.34	213.92	185.571	197.58	225.63	161.32	185.567	194.55	224.31	185.569	174.37	197.84	175.15	185.566
186.267	4.82	186.267	284.26	265.35	186.266	312.58	267.54	241.78	186.268	271.66	186.268	348.36	309.16	186.266	264.36	186.268	351.37	324.89	186.268	317.17	347.5	186.27	362.23	329.91	186.267	350.5	349.82	186.267	238.92	222.06	186.269	245.76	224.45	219.61	186.268	188.3	213.38	186.269	197.12	230.47	161.8	186.269	194.55	224.08	186.269	174.56	198.79	174.96	186.267
186.969	3.95	186.969	285.08	264.77	186.968	312.73	270.84	242.69	186.968	272.05	186.969	347.6	308.83	186.967	264.45	186.968	358.64	324.72	186.965	326.03	346.93	186.97	362.29	329.88	186.967	350.44	349.82	186.968	238.68	221.71	186.969	246.05	222.29	220.09	186.969	188.43	212.83	186.968	197.61	235.22	161.88	186.969	194.29	223.85	186.969	174.25	199.1	173.31	186.967
187.668	3.81	187.668	284.91	263.84	187.67	312.5	269.08	241.44	187.67	271.39	187.669	346.06	309.07	187.667	264.54	187.668	364.02	325.18	187.669	326.04	346.96	187.668	361.74	329.97	187.668	350.16	350.11	187.67	238.74	221.82	187.669	245.75	222.42	220.69	187.669	188.42	213.07	187.669	197.52	236.63	163.05	187.67	195.63	224.36	187.669	172.55	199.88	174.45	187.666
188.368	4.87	188.367	285.23	262.74	188.368	312.64	269.35	242.4	188.369	271.62	188.368	346.39	309.04	188.365	263.92	188.368	371.84	325.02	188.369	317.45	347.21	188.369	362.27	330.18	188.369	350.61	350.16	188.364	238.57	222.44	188.367	245.98	222.4	220.98	188.367	188.17	211.4	188.369	197.5	236.53	162.84	188.368	196.74	224.62	188.369	171.2	200.67	174.31	188.362
189.068	4.46	189.068	284.02	262.94	189.07	312.3	267.74	242.46	189.069	271.3	189.068	345.68	311.51	189.065	264.34	189.067	371.68	325.8	189.069	315.71	347.43	189.069	361.62	328.99	189.067	350.1	350.21	189.068	238.4	222.73	189.068	246.21	223.39	221.88	189.069	188.72	211.78	189.068	197.93	237.58	163.41	189.069	195.6	224.29	189.069	170.26	200.65	174.42	189.066
189.768	4.3	189.766	295.76	261.9	189.764	312.5	266.88	241.52	189.768	271.64	189.767	346.31	312.6	189.765	263.11	189.769	369.97	324.44	189.763	315.5	346.29	189.769	361.69	327.58	189.767	349.99	349.96	189.769	237.79	222.99	189.768	246.34	223.54	222.38	189.767	188.47	212.53	189.768	197.72	237.87	161.51	189.768	196.71	224.54	189.771	170.24	199.12	174.19	189.768
190.47	4.85	190.466	303.04	263.29	190.468	312.68	265.32	241.13	190.469	275.87	190.467	346.22	309.56	190.467	278.42	190.469	368.55	323.63	190.468	314.69	345.35	190.468	361.44	329.54	190.467	350.68	350.47	190.47	237.71	223.12	190.468	246.84	223.05	221.94	190.467	188.79	222.28	190.468	197.8	238.37	161.23	190.47	195.8	224.77	190.471	170.24	199.41	174.29	190.467
191.168	4.33	191.166	299.76	264.59	191.17	313.38	265.99	241.11	191.168	278.66	191.167	345.83	315.47	191.167	297.22	191.169	369.46	323.81	191.167	313.64	345.57	191.17	361.12	329.36	191.168	350.6	350.37	191.169	237.31	223.22	191.169	246.15	223.23	222.6	191.169	188.67	217.27	191.168	197.63	238.45	160.29	191.17	195.16	224.9	191.169	171	200.74	174.63	191.167
191.868	3.54	191.867	293.61	265.9	191.869	312.97	268.92	240.74	191.868	278.36	191.867	346.28	319.51	191.867	297.48	191.869	370.01	323.93	191.868	313.72	346.47	191.869	361.25	329.34	191.868	350.27	350.57	191.865	237.65	223.6	191.868	242.16	223.45	222	191.869	189.1	215.6	191.868	197.76	238.55	160.48	191.87	196.46	224.74	191.87	171.64	201.69	174.73	191.862
192.568	1.96	192.566	288.42	264.97	192.57	313.51	271.11	241.03	192.568	273.62	192.567	346.53	316.08	192.566	292.83	192.569	369.65	324.03	192.568	314	346.14	192.568	361.75	329.42	192.568	350.19	350.74	192.569	237.62	223.21	192.568	239.43	223.66	218.76	192.568	189.16	213.66	192.568	197.64	238.9	160.83	192.568	197.13	225	192.569	172.37	201.47	174.63	192.568
193.267	1.42	193.268	287.35	264.41	193.264	313.23	269.8	241.12	193.268	271.81	193.268	346.83	310.08	193.265	275.67	193.269	370.29	323.6	193.266	313.78	346.96	193.268	361.73	329.21	193.265	350.19	350.82	193.268	237.34	223.17	193.268	240.79	223.26	221.17	193.268	188.47	213.7	193.268	197.86	239.12	161.21	193.269	197.28	224.69	193.269	172.38	201.87	174.99	193.267
193.968	3.01	193.966	286.25	263.58	193.968	312.87	270.43	241.33	193.968	272.1	193.968	346.38	308.66	193.966	269.37	193.969	369.21	322.98	193.964	314.04	346.21	193.968	362.47	329.25	193.969	351.09	351.55	193.968	237.23	223.44	193.969	242.64	223.9	220.74	193.968	188.65	214.59	193.968	197.71	239.41	161.16	193.969	196.01	224.28	193.97	172.93	202.26	175.01	193.967
194.667	3.82	194.668	286.6	263.67	194.668	312.81	268.44	240.42	194.668	271.82	194.669	346.3	307.3	194.666	267.26	194.668	369.98	323.25	194.667	313.5	343.09	194.668	362.43	329.09	194.669	343.98	351.05	194.668	237.87	222.98	194.669	243.71	223.91	220.97	194.668	188.89	212.76	194.669	197.49	239.43	160.95	194.67	195.25	224.44	194.668	173.44	201.86	174.9	194.667
195.369	3.48	195.368	285.3	263.42	195.369	312.73	268.45	240.39	195.368	270.8	195.363	346.72	307.87	195.366	267.37	195.363	370.49	322.49	195.367	313.28	342.59	195.37	362.58	329.59	195.369	338.11	350.43	195.365	238.91	223.58	195.37	244.25	223.08	221.77	195.368	188.7	213	195.368	197.42	240.02	160.98	195.37	194.87	224.34	195.368	173.51	202.14	174.77	195.368
196.068	3.17	196.068	285.51	263.74	196.068	313.58	266.97	240.83	196.067	270.3	196.067	346.99	308.17	196.066	267.14	196.07	371.13	322.87	196.068	313.58	344.6	196.07	362.2	329.24	196.067	336.49	352.04	196.069	249.83	223.79	196.069	244.8	223.12	222.26	196.068	188.42	212.82	196.068	197.24	240.19	160.68	196.068	194.89	224.44	196.069	173.96	198.81	174.62	196.067
196.768	17.81	196.766	283.87	264.24	196.768	313.53	266.9	241.76	196.768	269.8	196.765	345.93	309.09	196.766	267.91	196.769	370.56	322.62	196.768	312.54	345.26	196.769	361.72	329.79	196.765	339.51	351.82	196.768	252.77	223.55	196.77	244.58	224.39	222.4	196.767	188.95	212.15	196.768	197.02	240.17	160.78	196.768	194.5	224.39	196.769	173.96	196.76	174.24	196.769
197.468	25.24	197.468	284.25	264.83	197.466	313.59	265.32	240.7	197.468	270.08	197.467	346.83	308.84	197.467	267.34	197.469	371.03	323.45	197.468	312.5	345.67	197.469	361.23	329.45	197.468	351.05	351.98	197.47	244.59	224.07	197.465	244.54	222.9	219.91	197.469	188.56	213.86	197.47	197.26	240.63	160.84	197.468	194.83	224.84	197.469	174.15	198.4	173.19	197.468
198.168	28.01	198.167	284.31	264.39	198.168	313.3	265.25	241.15	198.168	270.05	198.169	346.49	308.93	198.166	266.82	198.169	370.48	324.19	198.168	312.63	346.01	198.169	360.37	329.57	198.169	352.17	351.97	198.17	242.88	227.87	198.169	245	224.65	218.68	198.17	188.81	213.1	198.169	197.47	240.26	162.56	198.168	194.78	230.87	198.169	171.18	200.27	171.95	198.167
198.868	22.42	198.868	284.9	263.69	198.865	313.71	265.68	241.09	198.868	269.88	198.863	345.55	309.07	198.867	268.27	198.869	370.6	324.18	198.868	314.31	346.15	198.869	360.25	330.15	198.868	353.08	351.71	198.864	243.95	234.49	198.87	245.31	225.34	218.99	198.87	189.1	212.72	198.869	198.2	240.73	163.13	198.868	194.92	234.62	198.868	170.38	201.06	172.18	198.863
199.568	16.96	199.568	283.68	263.76	199.568	313.65	267.27	239.4	199.57	269.91	199.568	345.22	308.89	199.565	268.41	199.569	370.52	323.61	199.567	314.97	346.08	199.569	360.47	329.92	199.568	353.73	351.15	199.569	242	237.09	199.57	245.22	222.38	220.73	199.568	188.71	213.72	199.57	201.39	240.74	163.55	199.567	194.8	229.87	199.569	171.2	201.38	172.04	199.569
200.267	14.71	200.268	283.8	263.33	200.269	313.55	267.93	243	200.269	270.58	200.269	346.59	308.83	200.266	268.72	200.269	369.71	324.48	200.265	315.82	345.76	200.269	360.39	330.32	200.268	353.99	351.15	200.268	241.15	226.54	200.27	245.32	223.51	221.14	200.268	188.98	213.02	200.268	201.23	241.1	161.85	200.268	194.63	226.4	200.269	170.72	201.35	172.41	200.269
200.969	9.81	200.968	284.43	262.65	200.968	313.58	267.26	253.59	200.968	270.48	200.968	346.5	308.73	200.968	268.89	200.968	364.75	323.74	200.969	313.14	345.88	200.968	360.15	329.99	200.968	353.25	350.92	200.968	241.3	224.42	200.97	245.27	222.58	221.42	200.968	189.29	212.58	200.969	197.22	239.44	160.77	200.968	194.7	225.3	200.969	172	200.92	173.55	200.969
201.669	9.48	201.668	284.1	263.71	201.668	312.22	265.84	262.18	201.668	271.3	201.667	345.87	308.82	201.666	270.15	201.669	358.92	327.94	201.669	312.64	345.57	201.668	360.39	329.31	201.669	353.64	351.27	201.667	240.7	223.49	201.67	245.33	222.78	221.81	201.67	188.95	214.04	201.669	197.89	227.85	160.67	201.668	195.03	224.37	201.669	172.3	198.37	173.75	201.669
202.367	7.47	202.367	284.48	263.66	202.369	313.47	264.82	258.08	202.368	274.29	202.369	345.98	309.55	202.366	269.75	202.367	364.26	330.06	202.364	311.8	346.74	202.369	361.08	330.39	202.369	353.59	351.15	202.363	240.24	223.36	202.371	243.12	224.66	218.38	202.368	189.39	212.11	202.369	197.34	224.99	160.55	202.37	194.73	224.31	202.369	172.25	199.14	173.35	202.362
203.067	5.44	203.067	284.48	263.73	203.069	313.51	270.42	250.44	203.064	275.42	203.068	346.72	309.61	203.065	269.91	203.067	369.88	328.6	203.068	310.79	346.63	203.069	360.69	330.02	203.068	353.52	350.85	203.069	242.57	223.8	203.069	242.81	232.78	220.39	203.069	189.14	212.05	203.068	197.88	229.43	160.94	203.067	194.48	224.43	203.069	172.53	200.09	173.84	203.068
203.768	4.82	203.768	283.79	263.03	203.77	314.04	275.88	246.81	203.768	272.97	203.768	345.39	313.86	203.766	269.7	203.767	369.68	327.62	203.768	316.08	346.8	203.769	360.6	330.8	203.767	354.14	351.17	203.769	250.03	223.65	203.769	241.16	229.97	220.73	203.769	189.2	213.39	203.768	197.44	233.82	161.15	203.768	194.54	224.53	203.768	172.42	200.86	174.17	203.769
204.468	5.52	204.468	285.33	263.47	204.47	313.8	276.43	245.99	204.469	270.65	204.468	343.97	320.91	204.466	269.93	204.467	368.81	327.38	204.468	318.93	347.2	204.469	360.3	330.11	204.466	353.98	351.15	204.468	243.76	223.66	204.464	243.9	229.25	220.88	204.469	189.13	214.24	204.469	197.19	235.43	161.32	204.468	194.45	225.03	204.469	173	201.26	174.64	204.468
205.169	5.7	205.167	283.9	263.23	205.168	314.3	272.89	245.21	205.169	270.53	205.169	342.63	323.76	205.166	270.43	205.168	368.69	326.06	205.169	318.85	346.8	205.168	360.2	330.88	205.166	354.91	351.08	205.169	241.95	223.86	205.168	245.75	225.4	221.52	205.171	189.28	212.96	205.169	197.23	236.09	161.25	205.169	194.32	224.94	205.168	173.36	201.41	174.27	205.168
205.868	5.84	205.867	283.83	271.89	205.868	314.37	270.24	245.01	205.869	270.56	205.868	343.58	321.48	205.868	269.75	205.864	369.77	326.21	205.865	317.94	347.47	205.868	360.56	331.14	205.866	354.13	351.33	205.864	242.03	224.4	205.868	245.3	223.91	221.75	205.869	189.29	213.33	205.869	197.1	236.26	161.37	205.867	194.57	224.93	205.868	173.48	202.05	174.46	205.868
206.568	4.63	206.567	291.46	290.95	206.568	315.08	268.97	244.65	206.565	270.43	206.57	343.52	315.83	206.566	268.84	206.567	369.55	325.85	206.568	325.94	346.82	206.57	361.05	329.78	206.566	353.83	351.24	206.568	241.71	224.37	206.568	244.82	222.13	222.2	206.57	188.74	214.11	206.57	197.51	236.51	161.29	206.567	194.66	225.17	206.57	173.83	202.1	174.35	206.568
207.268	4.96	207.267	303.36	286.66	207.269	314.35	269.13	244.29	207.268	270.35	207.267	360.01	309.78	207.268	269.93	207.268	369.31	325.57	207.268	321.24	346.59	207.269	360.83	329.57	207.266	354.05	350.75	207.269	241.73	226.39	207.269	244.73	221.69	221.98	207.269	189.16	212.6	207.268	197.82	237.1	161.42	207.269	194.99	225.16	207.268	173.98	198.35	174.61	207.269
207.968	4.57	207.967	297.46	290.71	207.969	315.19	270.15	243.54	207.969	270.22	207.97	390.33	307.3	207.965	269.36	207.968	370.02	325.84	207.969	314.89	346.17	207.968	362.05	330.89	207.968	353.62	342.19	207.969	244.63	230.88	207.964	244.59	221.44	222.84	207.968	189.85	212.87	207.968	197.63	237.25	161.21	207.969	195.11	224.82	207.969	174.17	196.86	174.53	207.969
208.668	3.59	208.667	290.27	273.35	208.67	315.57	269.64	243.52	208.669	270.56	208.668	371.45	307.44	208.665	269.78	208.668	369.88	325.92	208.669	312.65	347.05	208.668	347.92	330.85	208.669	353.52	341.91	208.667	243.79	226.02	208.668	242.98	222.16	222.45	208.668	189.89	213.1	208.668	197.67	237.44	161.44	208.667	195.55	224.73	208.669	173.51	196.88	174.83	208.668
209.363	3.59	209.369	290.54	272.14	209.368	315.71	272.4	242.95	209.37	270.9	209.367	355.44	307.21	209.366	269.34	209.368	370.49	325.66	209.369	310.98	346.97	209.368	348.62	331.02	209.369	353.4	341.05	209.365	242.71	224.65	209.368	243.14	221.98	223	209.369	189.35	211.65	209.364	197.66	238	161.41	209.367	195.17	225.01	209.368	171.77	198.64	174.93	209.369
210.067	3.9	210.068	288.96	268.12	210.069	316.33	272.71	242.73	210.068	271.39	210.068	352.66	306.68	210.066	268.61	210.068	370.58	334.57	210.069	310.83	345.91	210.068	347.71	330.32	210.069	352.71	346.89	210.067	241.26	224.55	210.07	245.18	222.43	223.4	210.067	189.66	212.59	210.067	197.88	238.52	161.92	210.068	194.5	224.39	210.07	170.79	199.47	174.67	210.068
210.768	2.94	210.769	286.45	267.32	210.769	316.17	270.74	242.71	210.769	271.16	210.767	363.41	306.73	210.766	268.81	210.768	370.47	339.11	210.767	311.3	342.99	210.768	349.06	329.83	210.767	352.83	347.62	210.768	241.5	225.32	210.768	245.69	221.77	222.52	210.768	189.02	212.44	210.768	197.67	238.84	162.84	210.767	194.87	224.45	210.769	171.12	200.49	174.5	210.768
211.468	2.91	211.469	285.58	265.26	211.47	314.72	269.68	242.72	211.468	270.69	211.467	368.16	306.96	211.466	268.23	211.468	370.74	338.55	211.468	310.82	345.47	211.468	352.45	330.87	211.467	352.3	348.05	211.468	240.45	225.42	211.469	245.21	221.24	222.74	211.468	189.09	213.64	211.469	197.84	238.77	163.04	211.469	194.43	223.89	211.469	170.85	200.9	172.39	211.468
212.168	3.16	212.167	285.22	264.6	212.168	315.63	268.99	241.97	212.169	271.28	212.169	352.66	306.93	212.165	268.48	212.169	369.72	338.32	212.167	311.14	345.33	212.168	356.07	330.92	212.168	351.96	348.92	212.169	240.78	225.2	212.169	244.47	221.46	222.38	212.169	188.69	224.46	212.169	197.58	238.94	164.19	212.169	194.62	224.46	212.17	171.79	201.25	170.09	212.167
212.868	3.85	212.866	284.06	263.33	212.869	315.71	269.4	241.74	212.868	271.35	212.867	345.52	307.25	212.867	268.75	212.868	370.08	332.45	212.868	311.63	335.8	212.87	356.65	331.1	212.867	352.06	349.25	212.864	240.04	225.38	212.87	244.77	222.12	223.18	212.869	189.29	231.42	212.867	197.81	239.2	163.35	212.869	194.58	231.57	212.868	172.25	201.32	170.61	212.863
213.566	3.37	213.566	283.22	264.33	213.569	316.19	268.67	241.92	213.567	271.22	213.567	344.62	307.53	213.565	268.81	213.57	370.01	331	213.567	310.51	331.58	213.568	357.9	331.01	213.569	351.79	349.27	213.568	239.33	224.92	213.569	245.15	222.1	222.4	213.568	189.12	228.92	213.569	197.6	239.5	161.35	213.567	194.29	231.72	213.57	171.98	197.44	172.1	213.568
214.267	3.5	214.267	284.05	262.63	214.27	316.48	268.45	242.76	214.267	271.45	214.268	348.21	307.56	214.265	268.99	214.269	369.73	329.15	214.267	310.6	330.86	214.267	359.81	330.59	214.268	351.53	349.87	214.268	239.17	225.96	214.269	245.24	223.38	222.76	214.269	188.66	224.19	214.267	199.37	239.6	160.36	214.268	194.26	229.29	214.268	172.77	196.08	172.4	214.267
214.968	2.75	214.967	283.02	262.64	214.969	316.81	269.94	242.13	214.967	271.27	214.968	350.44	307.93	214.966	267.93	214.97	369.89	327.82	214.969	311.1	333.85	214.969	360.96	330.56	214.97	350.36	349.33	214.969	239.29	225.8	214.969	245.75	222.65	222.31	214.968	189.04	220.89	214.967	202.62	239.55	160.5	214.969	194.17	226.4	214.964	172.81	197.22	173.34	214.968
215.667	3.11	215.667	282.67	263.5	215.669	316.77	273.97	242.06	215.669	271.02	215.669	348.31	308.12	215.667	268.92	215.668	370.21	327.08	215.669	312.98	338.39	215.669	361.68	330.71	215.668	351.28	349.81	215.669	242.76	225.97	215.669	246.22	223.26	222.12	215.67	188.59	219.22	215.668	199.77	239.96	161.09	215.668	194.19	224.86	215.667	173.42	198.67	173.59	215.667
216.366	7.62	216.367	283.22	262.35	216.369	316.96	276.12	241.78	216.368	270.74	216.368	348.68	307.7	216.365	268.73	216.368	369.31	326.13	216.369	312.39	340.43	216.37	361.79	330.02	216.368	351.43	350.15	216.364	249.22	225.85	216.369	246.67	223.04	222.69	216.368	188.44	216.54	216.368	198.52	239.94	161.43	216.368	194.67	224.21	216.369	173.41	199.7	173.42	216.363
217.068	25.7	217.067	283.62	262.64	217.069	316.13	273.4	241.4	217.068	274.22	217.069	348.56	308.06	217.066	268.34	217.07	362.72	326.96	217.069	315.27	341.83	217.068	362.3	330.12	217.068	351.69	349.54	217.068	245.77	226.07	217.068	246.07	222.17	219.03	217.069	188.62	214.56	217.069	199.02	240.05	161.71	217.067	195.32	224.33	217.068	173.48	200.32	173.82	217.067
217.766	31.56	217.767	283.03	266.63	217.767	315.86	270.71	241.98	217.767	278.36	217.769	348.19	308.05	217.766	268.16	217.77	353.79	327.17	217.769	315.18	341.76	217.767	362.68	330	217.769	351.52	349.84	217.769	243.02	226.27	217.769	244.91	223.29	214.04	217.767	188.51	212.23	217.767	197.93	240.35	161.87	217.766	195.06	224.18	217.768	173.34	200.65	174.34	217.769
218.468	32	218.467	283.24	271.89	218.468	316.62	270.14	241.12	218.467	276.17	218.469	349.26	307.91	218.465	267.09	218.47	360.37	326.74	218.468	313.85	341.76	218.468	362.66	329.88	218.468	351.24	350.04	218.469	242.59	226.34	218.465	242.1	222.94	215.75	218.467	188.63	211.85	218.467	197.99	240.41	161.5	218.468	195.3	224.03	218.465	173.53	200.6	174.24	218.469
219.167	25.22	219.168	282.87	271.08	219.169	316.3	270	240.56	219.167	272.72	219.169	349.64	307.91	219.165	267.59	219.17	365.91	327.39	219.163	314.5	342.26	219.169	362.76	329.32	219.17	349.75	350.07	219.169	243.11	225.66	219.17	241.86	223.89	218.46	219.17	188.91	211.94	219.168	197.94	240.51	161.25	219.168	197.14	224.3	219.168	173.77	198.34	174.17	219.168
219.869	17.78	219.866	282.35	271.91	219.867	316.55	269.9	240.89	219.867	270.7	219.868	350.95	308.96	219.866	266.71	219.868	368.66	327	219.867	313.67	343.13	219.869	363.06	331.55	219.868	351.02	349.86	219.865	242.49	225.68	219.868	243.71	224.51	219.66	219.863	188.51	210.38	219.863	197.43	240.33	161.64	219.868	196.53	224.41	219.865	173.8	196.26	174.46	219.864
220.566	14.11	220.569	283.3	268.79	220.57	315.01	272.06	240.5	220.569	271.3	220.57	349.58	308.77	220.566	267.56	220.568	367.29	327.06	220.565	311.31	343.54	220.569	362.98	331.02	220.569	351.07	350.19	220.569	241.61	226.18	220.569	244.71	224.53	220.11	220.569	188.89	211.19	220.569	197.69	240.39	161.33	220.568	196.02	224.41	220.57	173.67	197.01	174.27	220.567
221.267	12.91	221.268	283.16	266.01	221.268	313.21	275.84	241.62	221.267	270.87	221.269	349.13	309.16	221.266	267.34	221.269	368.19	327.11	221.268	311.74	344.27	221.269	363.03	331.13	221.27	350.88	346.09	221.268	240.8	225.93	221.269	245.44	225.31	220.6	221.269	188.82	213.27	221.267	198	240.71	161.18	221.268	195.12	224.05	221.269	173.92	198.76	174.19	221.269
221.967	8.88	221.969	283.62	265.64	221.97	312.15	272.28	242.06	221.969	271.45	221.97	351.18	309.29	221.966	266.59	221.968	367.24	325.99	221.968	311.17	344.09	221.967	363.11	331.19	221.97	351.68	346.98	221.969	240.57	225.61	221.969	245.37	222.59	221.04	221.969	189.61	212.18	221.968	197.85	240.69	161.21	221.969	195.25	224.47	221.969	174.08	199.55	174.82	221.969
222.669	10.14	222.668	283.16	265.04	222.668	312.42	269.79	241.71	222.67	270.66	222.669	351.09	309.24	222.666	267.1	222.669	368.52	326.73	222.663	311.29	344.38	222.669	362.57	330.59	222.67	334.96	348.76	222.67	240.8	226.73	222.669	244.95	223.76	221.18	222.669	194.17	211.76	222.669	197.87	240.95	161.07	222.668	195.02	224.37	222.67	174.31	199.83	175.07	222.669
223.369	7.78	223.369	283.57	264.68	223.369	314.45	268.55	240.97	223.368	270.56	223.369	348.83	309.51	223.366	266.64	223.368	369.47	326.95	223.369	311.84	345.31	223.368	363.18	329.86	223.369	333.88	348.86	223.364	248.67	226.4	223.369	245.43	222.68	221.8	223.369	196.03	212.06	223.368	197.65	241.17	161.77	223.368	194.59	224.58	223.368	174.27	200.65	174.74	223.363
224.066	7.11	224.069	282.75	263.64	224.069	314.29	269.17	241.25	224.067	270.41	224.069	350.34	310	224.067	266.64	224.068	369.23	326.23	224.065	311.71	345.73	224.068	363.58	329.92	224.068	338.09	349.06	224.069	246.1	226.26	224.07	245.53	222.58	221.97	224.068	197.01	212.57	224.069	197.75	241.24	161.69	224.068	194.44	224.33	224.068	172.97	200.52	174.43	224.069
224.768	6.92	224.768	282.52	280.15	224.768	314.15	269.18	240.65	224.767	270.6	224.768	349.39	309.9	224.765	266.1	224.77	368.97	327.11	224.769	310.87	338.61	224.769	363.48	329.79	224.768	348.47	349.3	224.769	242.94	226.41	224.77	244.03	222.7	221.22	224.77	195.58	212.16	224.769	197.77	241.1	162.91	224.767	194.38	224.78	224.768	171.59	199.04	173.25	224.768
225.468	5.87	225.469	280.56	286.98	225.468	313.91	270.16	240.56	225.467	270.56	225.468	349.7	310.49	225.468	265.53	225.468	367.64	326.56	225.469	310.63	336.26	225.469	363.53	322.36	225.468	350.75	348.82	225.469	242.84	226.07	225.47	242.68	228.52	217.39	225.469	195.47	212.8	225.469	197.36	241.42	163.49	225.469	194.25	224.46	225.47	169.81	197.03	172.71	225.469
226.169	6.03	226.169	283.28	285.93	226.168	314.56	269.68	240.14	226.167	270	226.169	348.77	311.01	226.166	265.7	226.168	368.16	326.64	226.168	311.18	335.62	226.169	363.22	313.38	226.168	351.55	348.98	226.169	242.47	234.7	226.169	243.16	242.67	218.37	226.171	192.5	212.85	226.17	197.87	241.26	164.47	226.168	194.04	224.48	226.165	170.66	197.78	173.07	226.168
226.868	6.42	226.87	282.72	286.49	226.868	305.76	268.43	240.77	226.867	271.13	226.868	348.58	310.29	226.866	266.4	226.868	368.11	326.57	226.869	311.12	340.27	226.869	356.02	311.76	226.869	352.4	348.51	226.864	242.07	235.75	226.87	245.29	238.52	219.98	226.869	191.3	212.4	226.868	197.83	235.48	162.49	226.868	194.01	224.32	226.868	169.49	199.59	173.4	226.868
227.569	6.5	227.57	283.66	279.72	227.567	298.86	268.27	241.02	227.568	271.04	227.569	347.78	310.97	227.566	265.65	227.568	368.74	326.71	227.566	310.34	342.74	227.569	351.18	317.27	227.569	353.06	348.66	227.568	240.39	238.42	227.569	245.44	236.85	219.7	227.569	190.53	211.86	227.571	197.51	224.94	161.1	227.567	194.13	231.15	227.569	170.1	200.34	173.79	227.566
228.267	6.51	228.27	283.72	272.47	228.269	297.44	268.3	241.43	228.267	271.64	228.268	348.78	311.13	228.264	266.22	228.268	369.09	326.29	228.269	311.4	343.01	228.269	352.18	322.35	228.267	353.07	348.76	228.267	239.69	230.37	228.269	245.67	229.25	220.36	228.269	189.38	212.52	228.27	197.91	226.1	160.57	228.267	193.96	229.63	228.269	170.66	199.41	173.79	228.268
228.969	6.09	228.968	283.81	271.28	228.969	300.55	269.39	241.81	228.969	271.49	228.968	346.43	310.25	228.967	266.12	228.969	368.64	325.96	228.97	312.79	343.79	228.969	356.85	324.89	228.969	352.73	348.54	228.968	239.24	227.11	228.966	245.16	224.44	220.62	228.969	188.92	212.79	228.968	199.04	231.86	160.27	228.969	194.08	226.19	228.969	171.75	198.26	173.93	228.968
229.669	5.65	229.668	283.88	269.29	229.668	300.37	271.62	241.87	229.668	271.45	229.668	349.06	310.47	229.666	266.17	229.669	368.92	324.1	229.67	314.47	344.53	229.668	360.64	326.98	229.669	353.8	348.55	229.668	239.11	225.97	229.668	245.27	222.02	221.22	229.668	188.26	213.06	229.668	200.09	234.94	160.69	229.67	193.99	224.81	229.669	171.59	198.06	174.22	229.668
230.37	4.64	230.369	283.04	268.93	230.369	302.79	271.65	241.87	230.368	271.86	230.368	347.13	311.91	230.365	266.24	230.369	368.64	324.34	230.37	312.04	345.31	230.369	360.95	327.08	230.368	353.36	349.13	230.364	239.85	225.84	230.369	245.16	221.89	220.89	230.363	188.71	217.98	230.368	197.32	235.41	161.1	230.369	194.11	223.21	230.368	172.06	199.71	174.3	230.362
231.07	4.53	231.068	283.09	267.39	231.068	304.6	270.6	242.28	231.068	271.56	231.068	350.94	316.68	231.066	265.12	231.069	368.78	325.07	231.064	310.47	344.74	231.069	361.13	327.77	231.068	353.75	348.53	231.068	238.84	225.43	231.071	242.26	223.11	221.02	231.067	188.81	213.59	231.07	198.06	235.77	161.23	231.07	194	223.53	231.068	172.38	199.8	174.29	231.067
231.769	4.49	231.768	284.3	266.47	231.768	306.71	269.94	241.34	231.769	271.33	231.768	348.56	319.01	231.766	266.38	231.769	367.99	325.42	231.768	311.17	345.13	231.769	355.99	328.88	231.767	353.71	348.51	231.77	238.72	225.33	231.769	239.75	222.84	221.31	231.767	188.63	215.77	231.768	197.79	236.07	161.14	231.768	194.28	224.04	231.769	172.5	200.55	174.54	231.767
232.469	4.03	232.468	284.65	266.53	232.468	308.5	268.42	239.26	232.467	272	232.468	380.04	319.57	232.466	266.59	232.468	368.51	325.59	232.468	311.06	345.19	232.469	355.06	328.49	232.469	353.11	349.16	232.468	241.06	225.17	232.471	240.76	221.89	221.78	232.469	188.19	214.24	232.468	197.61	236.43	161.16	232.469	194.47	223.8	232.467	172.45	200.71	174.64	232.467
233.17	3.64	233.168	285.82	265.7	233.168	309.33	268.22	238.67	233.168	272.87	233.167	382.32	314.46	233.166	266.18	233.169	367.79	325.26	233.17	311.08	345.6	233.167	360.11	328.72	233.169	353.37	348.35	233.168	249.63	225.78	233.169	243.19	222.65	221.71	233.169	188.97	214.32	233.168	197.28	236.71	160.84	233.168	194.48	223.75	233.169	172.74	198.79	174.68	233.167
233.863	4.22	233.867	284.94	265.27	233.868	310.53	268.22	240.13	233.869	276.1	233.868	364.79	308.43	233.864	265.88	233.869	359.61	325.3	233.868	310.95	344.91	233.868	361.56	328.93	233.869	352.76	348.57	233.865	246.84	225.17	233.87	243.75	221.73	221.22	233.867	188.82	212.16	233.868	197.27	236.83	161.14	233.87	196.65	223.95	233.867	173.01	198.27	174.79	233.863
234.569	4.14	234.569	282.72	264.79	234.569	310.8	269.37	240.88	234.567	276.79	234.568	347.75	308.19	234.567	265.48	234.569	356.76	326	234.569	311.71	345.48	234.569	362.66	328.13	234.568	352.41	349.09	234.569	243.13	225.11	234.569	243.82	222.15	221.36	234.569	188.5	211.64	234.57	197.15	237.33	160.95	234.57	196.84	224.04	234.567	173.21	199.12	174.78	234.567
235.269	3.84	235.268	283.26	264.13	235.27	312.09	272.13	242.07	235.268	275.73	235.268	346.84	306.49	235.264	265.52	235.269	358.35	325.3	235.268	310.91	344.29	235.268	363.13	328.56	235.268	352.09	348.08	235.267	244.16	225.92	235.269	243.91	222.05	221.54	235.267	189.06	211.08	235.268	197.23	237.72	160.79	235.27	195.74	224.35	235.267	173.55	200.56	174.58	235.268
235.969	3.08	235.967	284.32	265.41	235.969	311.7	270.94	242	235.968	272.5	235.968	348.85	306.65	235.965	265.86	235.969	362.34	325.02	235.968	311.31	341.45	235.968	363.33	329.08	235.97	352.1	348.18	235.967	243.24	225.14	235.966	244.76	222.61	215.52	235.968	188.95	212.2	235.968	197.19	238.26	161.11	235.97	195.65	224.45	235.968	173.49	200.53	173.91	235.968
236.668	3.68	236.668	284.39	264.74	236.669	312	271.04	241.75	236.668	272.1	236.668	350.74	307.1	236.667	266.13	236.668	371.5	325.06	236.668	312.23	343.53	236.668	363.39	328.32	236.669	352.23	348.57	236.669	241.89	225.45	236.668	244.25	222.79	214.81	236.668	189.41	212.28	236.669	197.53	238.36	161.45	236.671	194.44	224.59	236.668	173.72	201.04	173.95	236.667
237.363	3.1	237.367	283.91	265.04	237.367	312.47	268.41	241.73	237.369	271.31	237.369	350.35	306.75	237.365	266.25	237.368	372.33	324.88	237.368	313.16	344.82	237.368	363.97	328.5	237.369	352.39	349.04	237.364	241.81	225.37	237.368	243.8	222.61	217.07	237.368	189.5	213.02	237.369	197.5	238.23	161.41	237.369	194.88	224.41	237.367	173.52	201.23	173.95	237.367
238.068	2.8	238.067	284.33	263.8	238.069	313.19	268.19	241.07	238.069	271.15	238.068	349.71	311.09	238.066	264.79	238.068	368.78	324.39	238.069	311.77	345.12	238.068	363.92	329.1	238.067	351.63	348.87	238.068	240.72	225.47	238.069	244.51	222.51	218.95	238.07	189.33	211.49	238.068	197.32	238.72	161.42	238.068	194.34	224.37	238.07	173.19	201.14	173.82	238.068
238.768	2.78	238.767	284	264.59	238.767	312.42	268.62	242.17	238.768	270.72	238.767	351.48	320.29	238.766	266.47	238.769	369.3	324.82	238.769	310.89	345.54	238.768	363.84	329.22	238.769	352.27	349.81	238.769	240.65	225.5	238.77	244.73	221.56	218.84	238.769	188.99	212.37	238.769	197.91	238.95	161.21	238.768	193.66	224.12	238.767	173.57	201.15	173.84	238.768
239.468	2.5	239.467	283.61	264.02	239.469	312.73	268.25	241	239.468	270.63	239.469	351.43	321.98	239.467	267.4	239.47	368.49	324.32	239.465	311.16	344.89	239.468	363.85	329.2	239.469	352.16	349.16	239.47	240.21	225.34	239.465	245.34	222.28	219.94	239.469	189.25	211.45	239.469	200.47	239.12	162.9	239.468	193.88	224.23	239.469	173.3	195.48	173.96	239.467
240.168	2.76	240.167	283.3	263.94	240.169	312.83	268.28	240.15	240.168	270.99	240.167	350.67	313.32	240.165	266.68	240.168	369.02	324.69	240.169	311.65	345.75	240.167	364.02	329.28	240.169	351.82	349.19	240.169	240.19	225.22	240.17	243.53	223.05	219.72	240.167	189.81	212.7	240.169	199.88	239.14	162.71	240.168	193.61	223.9	240.168	173.47	194.82	173.78	240.169
240.868	2.91	240.868	284.19	264.46	240.868	313.54	268.7	241.16	240.87	271.16	240.869	350.79	308.99	240.866	266.4	240.864	368.69	325.68	240.869	312.4	345.01	240.868	364.18	329.74	240.868	352.07	347.94	240.865	239.65	225.8	240.869	243.13	222.32	219.98	240.863	189.71	211.33	240.869	198.02	238.95	162.89	240.868	193.44	223.69	240.868	173.65	194.82	173.74	240.864
241.568	2.93	241.568	285.3	264.48	241.567	313.16	267.3	241.43	241.568	270.69	241.568	351.15	307.74	241.564	265.1	241.569	368.91	326.31	241.565	310.48	344.76	241.568	364.24	329.47	241.569	352.14	341	241.567	239.49	224.37	241.569	244.97	224.27	220.48	241.568	193.93	211.32	241.568	197.8	239.11	161.31	241.568	193.37	223.91	241.57	173.75	196.97	174.24	241.568
242.268	4.67	242.268	281.6	264.09	242.268	313.34	273.07	241.61	242.268	270.9	242.269	351.41	308.19	242.265	280.02	242.269	368.86	325.49	242.269	311.77	345.41	242.268	363.94	329.57	242.27	352.1	340.88	242.269	238.99	224.64	242.269	244.71	224.4	220.47	242.268	195.6	212.43	242.268	197.82	239.56	159.73	242.267	193.74	224.18	242.268	173.84	198.38	173.83	242.267
242.968	5	242.968	287.76	272.53	242.968	312.79	273.37	242.18	242.968	271.18	242.968	351.05	307.71	242.966	293.83	242.968	369.57	324.99	242.97	311.96	345.38	242.97	364.44	329.16	242.969	351.43	347.11	242.969	239.15	224.71	242.97	245.29	224.88	220.94	242.968	194.71	211.14	242.969	197.9	239.41	159.73	242.969	193.17	224.08	242.969	173.82	199.24	174.19	242.969
243.669	4.4	243.67	294.97	285.22	243.668	312.91	271.84	240.99	243.669	270.61	243.669	353.02	308.48	243.666	299.33	243.669	369.66	324.55	243.668	311.52	339.85	243.67	364.26	329.3	243.669	353	346.77	243.669	239.21	225.35	243.67	245.02	224.64	218.32	243.668	194.71	212.59	243.67	197.43	239.13	160.27	243.668	193.3	224.17	243.669	174.13	199.8	174.33	243.669
244.369	1.6	244.368	293.13	286.11	244.367	312.82	271.22	241.12	244.37	270.94	244.368	352.23	308.97	244.366	290.04	244.368	369.73	325.63	244.368	312.04	335.42	244.368	364.92	329.21	244.369	348.96	347.02	244.363	238.46	225.75	244.369	245.09	228.49	215.39	244.368	192.09	213.05	244.369	197.27	239.53	160.28	244.368	193.64	224.01	244.369	171.74	199.47	174.68	244.364
245.069	2.48	245.068	291.24	283.55	245.069	312.82	269.32	239.39	245.069	270.68	245.068	353.32	308.96	245.066	280.02	245.069	369.96	326.84	245.069	313.5	333.1	245.069	364.7	328.74	245.066	346.3	347.47	245.067	238.72	225.5	245.071	244.85	234.84	217.65	245.068	190.29	212.99	245.069	197.28	239.54	160.39	245.069	193.61	223.92	245.069	171.05	200.2	174.65	245.068
245.769	3.01	245.767	288.67	279.13	245.768	313.22	268.59	241.04	245.768	270.85	245.768	354.14	308.62	245.766	274.77	245.767	369.44	325.43	245.769	312.72	334.56	245.767	364.48	329.2	245.768	353.71	348.87	245.768	242.19	226.43	245.769	244.96	232.1	217.9	245.768	189.76	212.23	245.769	197.2	239.39	160.83	245.77	193.31	224.28	245.77	169.08	200.76	174.49	245.769
246.469	2.92	246.469	289.36	274.81	246.469	312.62	268.4	240.22	246.468	271.67	246.468	354.91	307.97	246.467	271.42	246.467	369.31	325.38	246.468	311.84	338.77	246.468	364.75	328.36	246.467	355.59	349.03	246.468	249.06	225.92	246.466	244.85	235.16	218.51	246.467	189.05	213.31	246.469	197.28	239.39	160.73	246.468	193.41	224.26	246.469	169.8	201.01	174.02	246.469
247.168	2.65	247.168	287.5	271.12	247.168	312.69	268.03	240.38	247.17	274.43	247.17	351.48	308.51	247.167	271.55	247.169	369.87	326.38	247.17	312.63	341.86	247.17	364.95	328.28	247.168	354.85	350.71	247.168	250.04	225.35	247.168	245.53	228.01	219.06	247.17	188.91	222.69	247.169	197.26	239.74	160.74	247.167	193.6	224.04	247.169	168.63	200.8	174.28	247.168
247.869	3.49	247.868	285.69	268.58	247.868	312.74	276.88	240.46	247.868	277.66	247.869	350.91	309.12	247.866	271.23	247.863	369.37	328.31	247.869	314.36	342.05	247.87	365.24	328.87	247.869	354.26	350.61	247.864	244.08	233.5	247.869	245.5	224.15	219.26	247.868	188.8	224.69	247.869	197.52	240.07	160.81	247.867	193.55	223.93	247.868	168.35	201.11	172.45	247.868
248.568	4.06	248.567	284.69	266.5	248.568	312.09	279.32	240.58	248.57	278.45	248.57	351.97	308.36	248.564	271.76	248.568	369	329.4	248.566	328.83	342.68	248.57	365.16	328.56	248.568	354.29	350.38	248.567	243.39	238.18	248.569	244.82	222.27	219.42	248.568	188.57	224.74	248.57	198.37	240.18	160.8	248.568	193.44	223.84	248.569	169.01	201.53	173.16	248.568
249.267	3.73	249.267	284.85	266.56	249.268	312.38	274.27	243.32	249.271	278.46	249.267	351.33	308.82	249.266	271.48	249.268	368.5	328.42	249.27	328.46	343.48	249.269	364.78	328.79	249.268	354.43	350.57	249.269	243.4	233.6	249.269	244.79	221.55	219.79	249.268	188.86	219.41	249.267	200.38	240.45	160.6	249.269	193.59	224.63	249.269	170.19	201.23	173.14	249.268
249.97	3.86	249.968	283.85	266.4	249.968	311.34	270.24	256.79	249.97	276.64	249.968	349.76	308.64	249.966	271.69	249.968	369.68	327.55	249.968	320.38	343.21	249.969	364.78	328.43	249.968	354.21	349.99	249.969	242.99	226.69	249.964	245.49	221.51	220.61	249.969	188.7	218.92	249.968	198.6	238.51	160.66	249.969	192.96	224.08	249.969	170.79	201.12	172.44	249.968
250.668	2.26	250.668	283.85	266.54	250.668	311.31	269.77	260.58	250.669	274.37	250.668	350.76	308.5	250.664	271.98	250.668	369.4	326.69	250.665	313.87	342.27	250.669	364.76	328.83	250.667	353.51	350.26	250.669	242.55	224.07	250.669	245.44	221.34	220.34	250.67	188.41	219.42	250.67	198.11	226.15	160.52	250.669	193.23	224.43	250.671	171.38	201.36	172.45	250.666
251.368	2.2	251.369	285.76	271.17	251.369	311.92	268.86	253.51	251.369	272.14	251.368	352.29	309.25	251.366	272.29	251.368	367.8	326.31	251.369	312.3	342.9	251.369	364.51	322.69	251.367	353.65	350.77	251.365	242.53	223.65	251.37	242.65	219.98	220.22	251.368	188.14	217.05	251.369	197.95	223.72	160.64	251.368	193.1	225.94	251.37	171.38	201.51	173.06	251.367
252.07	2.59	252.069	283.98	272.26	252.069	311.94	269.56	246.37	252.069	273.33	252.069	351.35	309.62	252.064	272.77	252.068	355.75	327.24	252.063	312.41	343.7	252.069	364.59	311.51	252.067	353.95	350.35	252.068	242.13	224.55	252.07	240.18	220.04	217.28	252.067	188.15	214.66	252.069	197.88	228.43	160.65	252.068	193.08	233.57	252.07	171.41	201.29	173.71	252.067
252.769	2.59	252.768	283.73	269.09	252.769	311.89	268.33	246.33	252.769	273.3	252.768	351.63	309.33	252.765	272.18	252.768	354.55	326.6	252.767	312.02	345.06	252.767	364.7	314.84	252.767	352.93	350.36	252.769	242.92	224.51	252.77	239.77	220.6	215.44	252.767	188.77	213.27	252.767	197.82	233.1	160.82	252.767	193.27	231.92	252.769	171.64	201.19	172.94	252.766
253.467	2.51	253.468	282.93	266.62	253.468	311.5	268.28	244.57	253.468	271.73	253.469	351.23	309.95	253.466	271.64	253.469	364.4	326.4	253.468	313.91	345.32	253.469	364.04	323.21	253.468	353.65	350.97	253.469	241.66	224.73	253.466	242.97	219.7	218.4	253.467	188.99	212.74	253.468	197.48	234.56	161.04	253.47	193.12	227.48	253.471	172.28	201.7	173.17	253.468
254.168	3.9	254.167	282.94	264.96	254.168	311.5	269.34	243.42	254.171	271.48	254.168	350.04	309.02	254.167	271.7	254.17	368.12	325.23	254.168	313.48	345.12	254.169	361.63	326.89	254.169	353.64	350.49	254.171	241.38	224.6	254.17	243.58	220.9	219.05	254.169	188.83	212.05	254.168	197.76	234.89	161.18	254.169	194.03	226.5	254.171	172.7	200.79	173.45	254.169
254.869	3.94	254.867	282.7	264.53	254.869	312.15	269.01	243.76	254.868	271.36	254.869	350.96	309.69	254.864	271.03	254.867	370.15	327.45	254.868	312.81	344.94	254.869	362.86	327.96	254.868	353.61	350.47	254.866	240.92	224.95	254.869	243.93	220.54	219.29	254.867	188.7	211.02	254.869	197.82	235.41	161.2	254.868	195.24	224.55	254.869	172.74	200.28	174.03	254.869
255.567	3.67	255.567	283.31	263.66	255.568	312.46	271.87	242.5	255.567	271.84	255.568	350.72	309.49	255.565	271.32	255.568	369.17	329.54	255.565	312.56	345.64	255.569	364.12	327.86	255.568	353.94	350.52	255.568	241.06	225.34	255.569	243.64	222	219.5	255.567	189.09	211.74	255.569	197.6	235.92	161.19	255.568	196.84	224.14	255.569	172.95	200.53	173.5	255.569
256.269	3.51	256.268	282.23	264.05	256.268	311.43	278.26	242.78	256.268	271.49	256.268	350.2	309.45	256.266	271.23	256.269	367.91	328	256.268	315.8	345.64	256.27	363.94	328.95	256.268	352.58	350.8	256.269	240.51	225.44	256.268	244.03	220.87	220.05	256.267	188.43	212.79	256.268	197.81	236.31	162.67	256.268	195.13	224.32	256.269	173.17	200.85	173.97	256.267
256.967	2.59	256.968	282.75	263.94	256.969	312.87	275.55	241.63	256.969	272.73	256.968	348.96	309.47	256.966	271.03	256.967	368.83	328.01	256.967	316.93	345.59	256.969	364.67	329.46	256.967	353.49	349.89	256.969	240.02	225.19	256.966	244.82	220.94	220.31	256.968	189.09	212.19	256.968	197.73	236.48	163.05	256.968	195.37	223.95	256.969	172.85	201.67	173.78	256.97
257.667	3.6	257.668	284.44	264.75	257.67	312.58	271.3	242.13	257.669	272.63	257.664	350.47	309.36	257.667	270.35	257.669	368.97	326.86	257.663	316.37	345.29	257.668	364.87	328.87	257.668	352.89	349.52	257.668	249.48	225.29	257.669	244.93	220.24	220.59	257.669	188.71	214.07	257.669	197.6	236.92	162.98	257.67	194.43	224.36	257.669	171.46	201.19	173.99	257.669
258.367	3.01	258.367	282.77	265.01	258.368	313.2	270.07	242.03	258.369	272.74	258.367	352.75	309.39	258.365	270.82	258.363	369.74	326.84	258.367	314.11	344.96	258.369	364.47	329.75	258.367	353.01	349.78	258.364	251.89	225.54	258.369	245.67	221.09	220.37	258.367	189.51	212.97	258.367	197.63	236.76	161.08	258.368	194.24	223.85	258.364	170.04	201.07	174.17	258.37
259.068	2.69	259.068	282.9	264.88	259.069	313.67	269.43	241.57	259.07	272.82	259.067	351.74	310.07	259.066	269.78	259.069	370.22	327.33	259.063	312.57	345.3	259.065	364.23	329.36	259.069	352.79	350.33	259.068	246.8	225.17	259.069	245.54	221.06	220.11	259.067	189.02	213.65	259.068	197.88	237.2	160.72	259.068	194.08	224.09	259.07	170.31	201.12	174.38	259.068
259.767	3.76	259.768	283.33	264.1	259.768	314.05	269.78	241.51	259.769	272.73	259.768	350.65	309.82	259.765	269.91	259.769	369.54	327.32	259.769	312.8	344.75	259.769	364.02	329.53	259.769	352.48	350.76	259.769	245.86	225.08	259.769	245.64	220.89	219.74	259.767	189.38	213.21	259.768	197.32	237.38	159.51	259.767	193.86	223.95	259.768	169.18	201.25	174.18	259.769
260.469	4.29	260.468	282.49	264.13	260.469	314.83	269.52	241.65	260.469	271.95	260.468	349.24	312.4	260.467	268.92	260.47	369.41	326.59	260.469	313.37	345.22	260.47	363.72	328.98	260.469	352.96	350.96	260.47	243.19	225.12	260.466	245.1	220.71	220.02	260.467	189.19	213.2	260.467	197.59	237.84	159.71	260.468	193.53	223.84	260.469	169.77	201.73	174.85	260.469
261.167	3.79	261.168	282.99	263.8	261.169	314.5	269.32	241.34	261.168	273.79	261.168	350.9	323.09	261.167	269.68	261.169	369.71	326	261.169	313.32	345.15	261.166	363.96	329.12	261.168	352.99	347.86	261.169	242.53	225.45	261.17	242.43	222.19	220.27	261.169	188.93	213.41	261.169	197.78	238.05	160.08	261.169	193.16	223.8	261.169	170.01	198.63	174.45	261.169
261.868	4.13	261.868	282.47	264.22	261.868	314.27	270.63	241.49	261.869	277.04	261.867	351.02	324.7	261.865	269.86	261.868	369.66	326.53	261.868	312.84	345.71	261.87	363.37	329.17	261.868	352.37	342.11	261.864	242.45	225.52	261.869	241.21	221.08	220.42	261.864	188.98	213.04	261.868	197.61	238.51	159.88	261.869	193.17	223.96	261.868	170.66	197.01	174.4	261.863
262.567	6.7	262.568	283.26	262.41	262.569	312.84	270.36	241.17	262.568	276.87	262.567	372.84	324.15	262.566	269.49	262.57	369.44	326.93	262.569	313.89	345.85	262.569	363.54	329.54	262.567	352.31	343.92	262.568	242.69	224.83	262.57	241.92	220.95	220.59	262.568	189.09	214.29	262.569	197.4	238.69	160.6	262.567	193.19	223.9	262.568	171.04	195.6	174.62	262.568
263.267	14.64	263.269	284.46	265.73	263.268	313.45	270.53	240.9	263.268	274.39	263.267	365.96	317.84	263.267	270.41	263.268	369.94	327.32	263.269	311.7	345.09	263.269	363.8	329.47	263.269	352.01	347.06	263.27	242.41	225.36	263.265	242.83	221.42	220.75	263.269	189.19	214.12	263.268	197.12	239.03	160.68	263.267	193.37	223.82	263.269	171.45	193.98	174.46	263.268
263.969	15.86	263.969	284.02	271.7	263.969	314.18	269.08	241.69	263.968	272.61	263.967	348.97	309.15	263.968	269.41	263.968	370.24	326.31	263.968	312.19	345.33	263.969	363.66	329.48	263.968	352.27	347.57	263.97	242.55	225.18	263.97	243.5	221.77	220.05	263.969	189.17	213.76	263.969	197.55	238.8	160.64	263.968	193.15	224.07	263.97	171.71	194.99	174.56	263.968
264.668	14.56	264.668	285.28	283.87	264.669	314.56	268.46	241.67	264.668	271.33	264.668	346.37	307.27	264.666	268.93	264.668	370.39	325.89	264.668	312.4	345.21	264.669	364.15	329.36	264.668	342.16	347.75	264.67	244.78	224.41	264.67	244.03	221.7	220.74	264.67	189.26	212.7	264.67	197.43	238.69	161.12	264.667	193.05	223.92	264.669	172.18	196.42	174.48	264.669
265.368	10.35	265.364	281.78	287.84	265.369	313.66	268.78	241.05	265.368	271.54	265.367	345.59	306.99	265.367	267.84	265.363	369.98	325.52	265.368	312.86	345.35	265.366	353.11	329.13	265.366	334.63	347.77	265.365	246.52	224.17	265.369	240.51	220.82	220.78	265.368	189.01	213.38	265.368	198.27	238.54	160.97	265.369	193.04	223.97	265.369	172.12	197.38	173.88	265.364
266.068	8.56	266.068	287.69	274.59	266.069	312.35	271.77	241.5	266.069	271.22	266.068	347.18	307.58	266.065	267.93	266.069	368.14	325.03	266.064	312.94	345.36	266.07	349.42	328.51	266.068	345.74	349.28	266.069	242.6	224.62	266.071	242.92	220.52	220.52	266.068	189.1	213.85	266.069	200.7	238.59	160.53	266.067	193.35	223.8	266.069	172.63	199.19	171.89	266.068
266.768	7.39	266.768	290.23	271.41	266.768	313.45	272.11	241.69	266.768	271.32	266.768	348.3	307.8	266.766	267.94	266.768	369.03	324.77	266.768	312.96	344.42	266.769	347.04	327.57	266.768	345.68	349.59	266.768	243.54	225.04	266.768	244.25	234.02	220.76	266.77	188.57	212.5	266.767	201.07	238.61	160.4	266.768	193.43	224.07	266.769	172.9	199.42	172.17	266.769
267.468	6.63	267.467	286.25	267.64	267.468	314.51	269.75	242.02	267.467	270.93	267.468	349.79	307.87	267.468	267.54	267.468	369.74	325.66	267.469	314.37	344.28	267.469	346.89	328.49	267.467	352.41	350.03	267.468	243.1	224.93	267.47	244.37	240.41	220.98	267.469	189.45	212.98	267.469	197.12	238.77	160.61	267.468	193.28	223.95	267.468	172.64	199.81	172.99	267.469
268.169	6.48	268.168	288.08	266.33	268.169	315.19	269.8	241.59	268.169	270.99	268.169	349.22	308.03	268.167	267.39	268.168	370.19	325.53	268.169	312.42	344.12	268.17	346.47	331.05	268.169	353.91	350.1	268.168	242.44	224.8	268.168	244.23	233.12	221.07	268.171	189.06	213.46	268.168	197.26	238.91	160.77	268.168	193.38	224.31	268.17	173.18	199.99	173.03	268.168
268.868	6.02	268.868	291.55	265.51	268.868	315.53	269.24	239.98	268.868	271.22	268.867	348.83	308.54	268.868	267.87	268.864	366.97	327.04	268.87	312.78	344.63	268.87	348.37	330.84	268.864	354.27	350.4	268.863	242.99	224.28	268.87	244.11	225.77	221.19	268.868	188.4	212.19	268.87	197.9	239.16	160.62	268.868	193.35	223.97	268.869	173.05	200.32	173.18	268.865
269.568	5.34	269.567	292.26	264.89	269.568	315.62	268.65	241.08	269.569	271.08	269.567	348.69	308.66	269.568	267.03	269.568	357.98	325.88	269.569	313.6	344.74	269.569	353.3	329.89	269.567	353.71	350.94	269.569	241.55	224.87	269.568	243.02	222.77	217.32	269.568	189.12	212.93	269.57	197.69	239.24	160.72	269.567	193.65	231.41	269.569	173.11	200.44	173.27	269.568
270.267	5.7	270.268	290.7	264.37	270.268	314.99	269.68	240.51	270.267	270.7	270.268	347.53	308.98	270.266	267.8	270.268	365.55	325.37	270.268	313.54	344.97	270.269	355.42	329.12	270.263	353.74	350.39	270.268	241.51	224.86	270.268	243.03	222.6	213.27	270.268	188.84	214.33	270.27	198.14	239.27	161.34	270.268	193.21	234.49	270.27	173.33	200.15	173.62	270.269
270.968	5.28	270.968	291.64	264.72	270.969	315.77	273.37	240.23	270.969	270.88	270.966	347.38	308.98	270.966	268.91	270.968	371.32	325.56	270.969	315.74	345.07	270.969	357.75	329.92	270.969	354.03	349.83	270.969	240.15	224.41	270.969	242.09	223.45	214.25	270.97	188.4	212.96	270.967	197.58	239.44	163.27	270.967	193.38	230.06	270.968	172.64	200.41	173.44	270.969
271.668	4.6	271.668	288.84	263.59	271.669	314.98	279.38	243.64	271.67	270.78	271.667	347.54	309.07	271.666	267.87	271.668	370.63	323.86	271.668	315.94	343.96	271.669	359.57	329.37	271.668	353.15	350.52	271.668	240.53	224.14	271.665	243.79	222.77	214.57	271.67	188.76	211.68	271.667	197.87	239.3	163.56	271.667	193.19	226.19	271.67	169.71	200.62	173.77	271.669
272.368	4.35	272.367	287.09	264	272.369	314.85	277.58	252.73	272.369	270.73	272.367	350.16	308.71	272.366	268.13	272.367	368.99	325.14	272.369	315.8	344.81	272.371	360.44	329.36	272.368	352.57	350.57	272.363	247.99	224.64	272.367	243.88	222.24	216.95	272.364	188.76	211.98	272.367	197.76	239.41	161.88	272.369	193.53	225.09	272.369	169.38	201.09	173.41	272.369
273.068	3.99	273.067	285.11	270.25	273.07	313.5	271.59	255.63	273.069	271.33	273.067	348.78	309.91	273.065	267.76	273.068	368.77	324.09	273.068	315.83	344.75	273.068	361.48	329.03	273.068	352.51	349.86	273.067	247.65	224.97	273.069	243.98	222.64	218.43	273.067	188.94	211.47	273.067	197.66	239.04	160.3	273.067	193.53	224.12	273.069	170.35	197.2	174.05	273.069
273.768	3.94	273.767	284.58	288.17	273.77	312.76	270.59	249.7	273.769	275.53	273.768	348.78	309.46	273.765	266.67	273.768	368.21	323.32	273.768	315.91	344.63	273.769	361.91	328.84	273.764	352.48	349.76	273.769	241.47	223.98	273.767	244.29	223.15	218.63	273.767	188.63	211.64	273.767	197.39	239.09	159.69	273.767	193.64	224.25	273.768	170.2	195.24	172.7	273.768
274.47	6.55	274.469	285.59	288.4	274.468	313.08	269.93	245.4	274.469	277.92	274.468	349.97	309.35	274.466	267.57	274.468	368.53	324.95	274.466	316.2	344.04	274.467	362.61	328.99	274.467	352.25	349.97	274.469	241.61	235.61	274.469	243.86	221.46	219.5	274.469	188.86	211.35	274.468	197.53	239.08	159.44	274.469	193.87	224.05	274.469	169.65	195.68	173.34	274.468
275.167	4.9	275.169	284.54	276.82	275.17	313.84	269.62	244.38	275.169	277.69	275.17	348.16	309.78	275.166	267.98	275.17	367.76	324.94	275.167	314.79	343.55	275.169	363.06	329.04	275.169	352.38	351.64	275.17	241.1	236.6	275.169	243.83	221.54	219.55	275.169	188.84	210.77	275.168	197.68	239.46	159.92	275.168	193.67	224.2	275.17	169.88	197.14	173.47	275.169
275.869	10.25	275.863	284.84	269.51	275.868	313.98	269.98	243.95	275.869	273.67	275.868	349.72	310.35	275.866	267.27	275.863	368.1	323.69	275.867	314.68	344.24	275.867	363.6	329.22	275.867	353.14	350.26	275.864	241.1	233.07	275.867	243.77	220.4	219.55	275.867	189.09	211.38	275.863	197.54	239.47	159.83	275.868	193.66	224.04	275.868	171.05	198.61	173.95	275.863
276.568	26.67	276.567	284.87	267.49	276.57	314.15	269.83	243.86	276.567	272.47	276.569	348.76	310.25	276.566	268.21	276.568	367.97	324.12	276.566	314.05	344.94	276.569	363.94	329.22	276.568	353.53	350.5	276.568	241.15	225.54	276.569	244.14	220.69	218.78	276.568	188.89	211.06	276.568	197.64	239.28	160.26	276.567	193.73	224.19	276.568	171.05	199.1	173.48	276.567
277.27	28.77	277.267	283.86	267.35	277.27	312.49	269.42	242.77	277.269	272.19	277.268	348.95	310.26	277.266	268.5	277.269	368.29	324.61	277.268	312.13	345.35	277.268	363.81	329.25	277.263	353.17	350.07	277.269	241.05	224.14	277.269	243.97	220.85	220.07	277.268	189.35	210.55	277.269	197.79	239.27	160.37	277.269	193.54	224.33	277.264	171.21	199.43	173.7	277.27
277.967	25.95	277.969	283.39	267.16	277.97	313.47	269.74	243.1	277.967	271.85	277.967	351.3	310.02	277.967	267.75	277.969	368.41	323.51	277.967	311.53	345.85	277.968	364.25	329.34	277.968	353.19	349.8	277.969	240.72	224.02	277.97	244.32	220.65	219.86	277.967	189.35	222.54	277.968	198.99	239.24	160.58	277.969	193.16	223.9	277.968	171.72	200.23	173.75	277.968
278.667	23.73	278.667	283.78	265.21	278.667	314.15	269.86	242.75	278.669	270.78	278.669	352.25	309.4	278.667	268.86	278.669	368.69	323.97	278.669	310.84	345.68	278.667	363.84	329.46	278.668	353.59	349.4	278.668	239.6	224.17	278.669	243.8	221.69	219.75	278.668	189.36	237.07	278.669	201.53	239.74	160.58	278.669	193.27	223.98	278.67	171.73	200.39	173.73	278.668
279.367	17.56	279.364	284.1	264.92	279.369	314.67	269.47	241.98	279.369	271.33	279.368	351.27	309.94	279.366	268.95	279.364	367.86	324.89	279.369	311.86	345.04	279.369	364.32	329.1	279.37	352.76	349.91	279.364	239.19	223.97	279.369	242.13	222.65	220.4	279.363	189.07	235.22	279.369	200.13	239.4	160.77	279.369	193.29	224.02	279.368	172.05	200.44	174.36	279.369
280.069	11.73	280.067	283.92	265.28	280.068	314.39	269.25	242.74	280.069	271.48	280.066	350.91	310	280.065	268.49	280.068	367.68	324.39	280.063	312.01	344.55	280.069	364.67	329.34	280.069	352.67	349.63	280.069	240	223.97	280.069	239.89	221.48	219.99	280.069	189.64	222.46	280.068	199.17	239.33	160.74	280.066	193.74	224.23	280.068	172.54	197.15	174.33	280.069
280.768	10.22	280.766	283.12	264.5	280.768	313.57	269.46	241.81	280.768	271.59	280.769	353.92	309.26	280.767	268.47	280.766	368.78	324.9	280.767	311.3	344.9	280.768	364.55	329.64	280.764	352.42	349.26	280.768	241.89	223.61	280.768	238.03	222.28	218.75	280.769	189	220.38	280.77	198.82	233.27	160.63	280.768	193.43	223.91	280.769	172.66	196.04	174.74	280.768
281.468	10.31	281.469	284.15	264.33	281.468	313.8	269.45	241.57	281.468	271.81	281.469	349.96	309.74	281.467	268.21	281.469	368.54	323.98	281.469	312.16	343.75	281.468	364.3	329.19	281.469	351.77	349.61	281.468	251.84	223.88	281.469	239.63	222.51	215.52	281.469	188.9	216.43	281.469	197.37	223.71	162.07	281.467	193.3	223.8	281.469	172.47	196.7	173.16	281.468
282.164	15.89	282.167	283.55	264.62	282.168	300.07	281.26	242.85	282.169	271.64	282.168	347.75	310.12	282.163	268.53	282.17	367.86	323.68	282.164	312.02	342.48	282.168	364.17	329.67	282.17	352.04	348.84	282.169	249.45	223.64	282.169	241.14	222.06	217.61	282.169	188.96	213.66	282.169	197.45	224.35	162.89	282.168	193.54	223.87	282.169	172.69	198.45	171.69	282.168
282.864	13.18	282.864	282.94	263.49	282.868	300.31	285.03	241.95	282.869	271.82	282.87	350.38	310.57	282.867	268.79	282.863	368.2	324.79	282.868	311.01	342.5	282.869	364.44	329.31	282.869	351.92	349.18	282.865	244.57	223.39	282.869	242.04	222.52	219.6	282.869	188.83	212.4	282.869	197.32	230.12	161.25	282.867	193.09	223.97	282.869	172.64	199.29	170.88	282.868
283.568	8.67	283.566	282.89	264.7	283.568	299.82	279.15	241.59	283.57	271.87	283.565	349.19	311.21	283.568	268.53	283.569	355.36	325.28	283.567	311.9	342.31	283.569	363.8	330.09	283.57	351.71	349.28	283.569	243.04	223.93	283.567	242.64	221.51	219.2	283.57	188.81	211.53	283.569	197.72	233.1	160.36	283.567	192.95	223.95	283.569	172.82	199.5	172.56	283.568
284.268	10.84	284.269	283.39	264.06	284.269	300.76	273.91	240.97	284.268	271.73	284.268	350.52	310.71	284.262	267.08	284.269	351.47	325.53	284.268	312.89	343.08	284.27	364.06	330.86	284.266	351.11	349.03	284.269	242.99	223.67	284.268	242.63	221.37	219.81	284.268	188.99	212.46	284.269	197.48	233.69	159.44	284.268	193.06	224.04	284.268	172.45	200.06	173.21	284.269
284.969	7.82	284.968	283.08	263.34	284.968	301.88	271.76	241.85	284.97	271.27	284.97	345.17	310.58	284.967	266.6	284.969	361.39	324.53	284.968	314.76	342.67	284.969	364.21	330.52	284.969	351.54	348.86	284.968	242.43	223.9	284.969	242.59	220.79	219.85	284.969	189.11	212.95	284.969	197.51	234.52	159.69	284.969	192.92	224.1	284.969	171.14	200.43	173.41	284.969
285.668	7.45	285.67	283.38	263.63	285.668	305.65	271.81	242.79	285.668	271.17	285.665	345.22	310.62	285.666	266.81	285.669	368.97	323.08	285.668	315.11	342.35	285.669	363.96	330.27	285.67	351.45	348.95	285.67	242.14	223.2	285.669	243.27	220.94	220.53	285.669	188.58	211.93	285.671	197.44	234.75	159.83	285.668	193.03	223.11	285.67	169.16	201.1	173.01	285.67
286.364	7.38	286.369	283.96	264.12	286.368	308.7	270.5	242.06	286.368	271.09	286.369	348.37	310.9	286.366	266.72	286.369	369	324.3	286.368	314.75	343.25	286.368	363.32	329.87	286.37	351.2	348.77	286.364	241.65	223.47	286.369	242.77	221.02	220.32	286.369	191.47	211.94	286.37	197.15	234.98	159.9	286.37	192.95	223.3	286.369	168.43	200.37	173.46	286.362
287.068	8.65	287.067	285.29	262.94	287.07	310.48	269.85	242.22	287.066	271.34	287.066	347.41	310.53	287.066	267.38	287.069	368	324.88	287.063	311.52	343.05	287.07	363.98	328.98	287.068	351.93	348.38	287.068	241.75	224.13	287.069	243.8	221.23	221.06	287.068	193.42	211.51	287.07	196.97	235.5	159.94	287.068	193.14	229.76	287.069	168.64	196.05	173.47	287.068
287.765	8.86	287.768	283.59	263.61	287.769	312.06	270.48	242.07	287.769	271.41	287.769	348.78	311.17	287.766	268.43	287.769	369.55	323.91	287.765	312.24	342.56	287.768	363.97	328.06	287.764	351.25	348.39	287.768	240.47	224.07	287.768	242.81	221.36	220.63	287.768	194.28	211.46	287.769	196.76	235.96	160.19	287.769	193.05	233.06	287.769	168.68	193.82	173.73	287.769
288.467	8.71	288.468	283.22	263.94	288.469	312.56	270.24	242.19	288.467	270.68	288.469	349.48	310.93	288.467	268.3	288.47	369.87	323.1	288.467	311.75	340.29	288.469	364.05	327.64	288.467	350.66	348.61	288.47	240.47	224.61	288.47	243.36	221.81	221.32	288.469	196.04	212.25	288.471	196.8	235.8	160.48	288.469	192.96	228.93	288.469	168.77	195.67	173.93	288.468
289.168	8.9	289.168	283.07	264.39	289.17	314.06	269.64	243.02	289.168	271.03	289.166	351	310.45	289.167	268.02	289.168	369.39	324.75	289.169	311.18	338.08	289.168	363.49	328.63	289.17	351.1	348.92	289.169	240.07	223.24	289.17	243.06	221.94	220.79	289.169	195.18	211.93	289.17	196.55	236.26	160.71	289.169	193.05	226.55	289.169	169.97	198	173.82	289.169
289.868	8.77	289.869	282.83	263.97	289.869	314.07	269.69	250.57	289.867	270.57	289.866	349.87	309.5	289.866	267.89	289.864	369.75	324.79	289.868	312.34	337.8	289.87	363.95	329.63	289.869	351.53	349.14	289.865	240.44	223.63	289.867	243.31	222.4	221.26	289.87	194.58	211.2	289.87	196.86	236.35	160.68	289.869	193.21	224.76	289.868	170.65	198.51	173.88	289.863
290.569	8.67	290.569	283.18	262.81	290.568	314.37	269.89	256.41	290.567	270.4	290.564	351.31	310.46	290.566	269.92	290.569	369.27	324.8	290.569	312.75	340.55	290.568	364.14	329.85	290.568	351.16	348.77	290.567	239.49	223.94	290.567	243.81	221.89	221.42	290.569	192.77	211.36	290.571	196.65	236.44	160.7	290.568	196.33	224.18	290.568	170.75	199.04	173.98	290.568
291.269	7.42	291.27	283.17	264.45	291.27	314.52	270.83	253.2	291.268	270.68	291.267	351.81	312.01	291.267	296.52	291.269	368.94	323.88	291.268	312.23	342.1	291.27	364.28	330.31	291.265	351.07	348.92	291.267	239.08	224.07	291.27	243.99	221.13	221.49	291.269	191.17	211.4	291.269	196.46	236.85	160.51	291.269	197.44	224.3	291.27	171.1	199.57	173.97	291.267
291.97	7.54	291.969	283.42	264.82	291.969	314.87	271.24	247.13	291.968	274.72	291.969	352.08	315.81	291.967	301.2	291.968	369.13	324.96	291.969	310.04	342.7	291.968	363.81	330.48	291.967	350.87	349.15	291.967	239.31	223.36	291.97	243.24	221.48	221.31	291.969	189.66	211.44	291.97	196.33	237.05	160.08	291.97	195.27	223.88	291.969	171.41	199.53	174.21	291.967
292.669	8.32	292.669	283.87	271.61	292.669	315.99	270.99	245.95	292.669	277.53	292.669	351.37	317.61	292.665	294.93	292.669	369.4	324.95	292.67	310.61	341.87	292.668	364.81	330.91	292.669	351.27	348.91	292.668	239.3	223.78	292.67	243.01	222.16	221.52	292.669	188.76	211.82	292.669	196.31	237.25	159.8	292.669	194.46	223.94	292.669	171.45	200.01	174.22	292.667
293.369	7.97	293.365	283.75	285.91	293.371	316.16	270.17	244.81	293.369	278.42	293.367	351.38	316.24	293.367	285.38	293.364	369.59	324.38	293.369	310.95	342.27	293.365	364.67	331.48	293.366	350.91	348.59	293.363	239.18	223.39	293.368	238.81	221.85	221.71	293.363	187.97	210.74	293.368	196.49	237.17	160.21	293.365	193.9	224.45	293.369	171.81	200.49	174.34	293.367
294.069	8.09	294.069	283.96	287.23	294.069	314.83	270.57	244.48	294.07	275.8	294.067	353.27	312.02	294.064	280.38	294.069	369.01	324.02	294.07	311.34	341.71	294.066	364.53	330.98	294.069	351.02	348.92	294.067	238.92	224.1	294.068	238.18	220.23	221.47	294.067	187.93	211.31	294.068	196.19	237.73	159.82	294.069	194.18	224.36	294.069	172.04	200.26	174.35	294.067
294.768	7.97	294.768	283.04	275.81	294.77	315.69	269.74	245.13	294.769	274.17	294.769	353.54	310.92	294.766	275.33	294.769	369.32	324.09	294.769	311.38	341.86	294.769	365.05	331.24	294.769	350.41	342.91	294.767	239.58	223.93	294.769	240.5	222.01	221.08	294.767	188.26	212.45	294.768	196.1	237.62	160.14	294.769	193.85	224.3	294.769	172.25	195.9	174.38	294.769
295.47	8.18	295.468	285.77	270.72	295.47	315.12	270.36	243.51	295.468	273.46	295.467	352.55	310.05	295.465	273.81	295.469	369.15	323.75	295.467	312.75	341.55	295.468	364.34	330.59	295.468	350.83	341.25	295.469	249.31	223.44	295.469	241.2	221.69	221.46	295.468	188.06	211.36	295.467	196.11	237.72	160.18	295.478	193.46	224.43	295.469	172.22	195.94	174.41	295.469
296.169	9.88	296.167	285.64	267.91	296.17	315.49	270.6	246.5	296.17	272.7	296.168	353.76	310.52	296.165	274	296.169	369.73	323.7	296.169	312.23	341.75	296.168	364.53	331.28	296.17	351.05	342.79	296.169	251.97	223.87	296.171	242.13	221.12	221.07	296.17	187.71	211.83	296.168	197.86	237.79	160.12	296.169	193.19	224.13	296.171	172.73	196.48	174.5	296.169
296.868	9.17	296.868	286.53	266.24	296.868	314.84	270.28	250.77	296.868	271.59	296.869	354.18	310.85	296.865	274.32	296.869	368.96	323.97	296.868	312.52	342.07	296.868	364.75	330.96	296.869	349.23	344.75	296.864	244.18	223.97	296.869	242.37	220.49	215.45	296.868	188.14	217.72	296.868	200.17	238.1	160.56	296.87	193	224.36	296.869	172.25	198.87	173.83	296.864
297.567	6.82	297.568	288.68	266.54	297.568	314.53	270.38	247.49	297.566	271.12	297.568	356.3	310.09	297.566	273.47	297.57	369.37	323.25	297.568	313.46	342.87	297.564	364.92	331.46	297.567	332.93	345.26	297.568	243.88	223.42	297.569	242.44	220.02	211.75	297.568	187.91	225.31	297.569	199.22	237.68	160.32	297.568	192.69	224.36	297.568	172.31	199.19	172.83	297.568
298.269	7.25	298.267	287.8	265.9	298.27	313.98	270.52	244.09	298.267	270.38	298.269	353.12	310.43	298.266	274.68	298.27	353.85	323.42	298.268	311.75	343.2	298.269	365.03	330.23	298.267	333.26	344.65	298.269	242.16	222.8	298.269	241.58	220.75	213.22	298.268	188.12	224.38	298.268	195.9	238.15	160.57	298.268	192.92	223.85	298.269	172.8	199.75	171.88	298.269
298.969	15.53	298.969	285.85	265.06	298.97	313.98	269.77	244.75	298.968	271.06	298.968	355.09	310.14	298.965	273.14	298.969	351.61	335.18	298.969	311.89	343.26	298.97	365.7	330.9	298.969	334.1	346.02	298.969	241.79	223.08	298.97	241.24	221.57	215.78	298.967	188.11	222.21	298.968	197.14	238.08	162.85	298.968	192.9	224.09	298.968	172.57	200.02	173.42	298.968
299.669	25.27	299.669	285.52	265.97	299.669	313.35	269.9	244.23	299.668	272	299.668	354.37	310.56	299.665	272.53	299.67	354.74	333.57	299.669	313.13	343.15	299.669	365.61	330.99	299.669	345.65	346.73	299.668	241.27	223.14	299.669	241.82	222.82	217.23	299.67	188.51	218.52	299.67	196.66	238.23	162.64	299.67	192.72	224.07	299.669	169.95	200.47	173.55	299.669
[truncated: 21 more columns]

## Sheet: Day7-timelapse
Time [s]	#1 (TD)	#2 (TD)	Time [s]	#1 (TD)	#2 (TD)	Time [s]	#1 (TD)	#2 (TD)	Time [s]	#1 (TD)	#2 (TD)	#3 (TD)	#4 (TD)	Time [s]	#1 (TD)	#2 (TD)	#3 (TD)	Time [s]	#1 (TD)	#2 (TD)	Time [s]	#1 (TD)	Time [s]	#1 (TD)	#2 (TD)	Time [s]	#1 (TD)	#2 (TD)	#3 (TD)
0.064	211.41	212.44	0.065	167.86	199.76	0.065	244.14	237.02	0.064	288.28	239.44	215.45	220.35	0.064	143.87	203.52	204.94	0.064	183.96	179.13	0.066	183.24	0.063	174.41	230.18	0.065	234.57	228.14	176.17
0.769	211.32	211.73	0.769	167.47	199.58	0.767	245.99	235.96	0.77	287.88	239.32	215.35	220.46	0.768	143.83	203.33	204.58	0.768	184.39	179.08	0.768	175.38	0.767	173.56	230.14	0.769	234.65	227.83	176.06
1.464	211.55	211.59	1.463	170.63	199.67	1.463	242.83	235.89	1.464	287.03	239.52	216.07	220.19	1.462	143.45	203.86	204.92	1.464	184.25	179.31	1.464	171.69	1.463	174.25	229.95	1.465	233.75	227.48	175.72
2.168	211.07	211.28	2.169	170.6	199.46	2.167	244.41	234.97	2.17	288.12	239.49	216.03	220.06	2.169	143.89	203.76	205.26	2.169	184.35	179.68	2.168	170.06	2.167	173.93	230.34	2.167	233.81	227.53	175.56
2.869	211.62	211.83	2.869	172.24	199.94	2.869	245.73	235.85	2.868	288.49	240.18	216.79	220.41	2.868	142.99	203.53	203.79	2.869	184.3	179.47	2.87	169.88	2.867	173.97	229.92	2.867	233.85	227.2	175.7
3.568	210.28	211.6	3.569	171.82	199.88	3.567	245.68	235.92	3.568	288.1	239.87	216.2	219.99	3.568	142.54	203.86	201.52	3.568	184.19	179.46	3.568	169.34	3.567	174.33	229.47	3.567	233.76	226.96	175.2
4.269	210.4	211.65	4.269	169.98	199.64	4.267	245.84	236.81	4.268	288.31	240.08	215.12	220.08	4.268	142.49	203.77	203.4	4.269	183.93	179.26	4.268	168.87	4.267	174.31	226.27	4.267	233.92	227.2	175.29
4.969	210.46	212.02	4.969	170.72	199.92	4.969	245.6	237.16	4.968	287.58	240.08	215.01	219.92	4.97	141.72	203.46	204.19	4.969	184.14	179.6	4.968	169.38	4.967	174.18	225.56	4.967	233.78	227.17	175.39
5.668	211.32	210.85	5.669	169.59	199.69	5.667	245.39	236.92	5.67	287.16	240.51	214.85	219.78	5.668	141.83	203.65	203.78	5.669	184.08	178.8	5.668	168.9	5.667	174.13	226.21	5.667	233.37	227.1	175.22
6.369	210.78	211.65	6.369	170.04	199.67	6.369	245.51	236.71	6.368	287.46	239.91	215.39	219.83	6.368	142.25	203.57	203.62	6.369	183.98	178.97	6.368	169.56	6.367	174.42	229.4	6.367	232.93	226.77	175.13
7.069	210.94	211.59	7.069	169.64	200.08	7.069	245.41	236.58	7.07	287.02	240.21	215.11	219.99	7.068	142.1	203.48	204.21	7.069	184.6	179.01	7.068	169.37	7.067	174.03	229.87	7.067	232.68	226.36	174.88
7.769	210.95	211.41	7.769	169.16	199.61	7.769	245.13	236.88	7.768	287.11	240.13	215.38	219.77	7.77	142	203.03	204.49	7.769	184.53	179.34	7.768	170.34	7.769	173.62	230.44	7.767	232.39	226.41	174.78
8.469	211.22	211.98	8.469	168.69	199.78	8.469	245.47	236.85	8.47	285.87	240.33	214.93	219.95	8.468	142.37	203.09	204.43	8.469	184.88	179.4	8.468	169.68	8.469	173.78	230.92	8.467	232.67	226.78	171.23
9.169	210.81	211.3	9.169	168.57	199.55	9.167	245.55	237	9.168	283.7	240.43	214.98	220.3	9.168	142.78	203.15	204.59	9.169	177.3	179.4	9.168	170.38	9.169	174.39	230.55	9.167	232.6	226.53	168.95
9.869	211.06	211.82	9.869	168	199.78	9.869	245.31	237.15	9.868	285.84	240.76	214.59	219.81	9.868	143.07	203.71	205.1	9.869	175.57	179.17	9.868	169.87	9.867	173.86	230.62	9.867	232.16	226.08	168.65
10.569	211.22	210.99	10.569	167.99	199.87	10.57	245.43	236.8	10.568	287.4	240.39	215.38	219.95	10.568	142.07	203.66	205.2	10.569	175.31	179.21	10.569	170.35	10.567	173.42	230.51	10.568	228.93	229.87	171.92
11.269	210.69	210.96	11.269	168.2	199.73	11.264	245.25	236.98	11.27	287.15	240.44	215.01	220.02	11.268	142.85	203.1	205.09	11.269	175.06	179.34	11.268	169.97	11.267	173.81	230.65	11.268	216.85	229.07	173.91
11.969	210.69	211.24	11.969	168.04	199.41	11.968	245.69	237.2	11.968	287.59	240.25	215.95	220.52	11.968	142.95	202.68	204.86	11.971	175.21	179.06	11.97	169.81	11.968	173.66	230.55	11.967	213.39	224.65	174.44
12.671	210.67	211.42	12.669	168.15	199.36	12.669	245.26	237.17	12.67	286.6	240.59	215.38	220.57	12.668	142.69	203.02	205.4	12.671	175.64	179.44	12.67	169.72	12.67	173.2	230.75	12.67	214.06	221.17	174.68
13.369	211.03	211.49	13.369	168.03	199.33	13.37	245.12	237.1	13.368	287.41	240.15	209.4	220.34	13.368	142.63	202.82	205.44	13.369	178.65	178.99	13.368	170.29	13.367	173.36	230.8	13.368	214.22	221.39	174.44
14.065	210.76	211.76	14.069	167.95	199.25	14.07	245.02	236.77	14.068	286.14	240.49	211.33	220.22	14.068	147.21	202.73	205.38	14.069	181.3	178.76	14.07	170.43	14.068	173.27	230.95	14.068	214.9	221.74	174.22
14.767	210.92	210.94	14.769	168.12	199.69	14.764	244.9	237.27	14.77	287.8	241.99	213.02	220.23	14.768	150.58	202.79	205.61	14.77	182.74	179.3	14.769	170	14.766	173.46	230.88	14.768	216.59	221.99	173.92
15.469	210.96	210.44	15.469	167.87	199.43	15.47	245.05	237.1	15.468	250.95	248.49	213.21	216.11	15.468	148.97	202.54	205.46	15.47	183.42	179.16	15.47	170.07	15.47	173.66	231.03	15.468	220.62	222.32	174.14
16.169	210.77	211.65	16.169	167.45	199.69	16.17	245	233.35	16.17	249.51	249.74	214.49	211.72	16.168	144.8	203.05	205.38	16.17	183.48	179.26	16.17	169.83	16.168	173.36	230.75	16.168	224.9	222.91	174.06
16.867	211.13	211.72	16.869	167.99	198.74	16.868	240.87	233.5	16.868	259.42	247.45	215.97	210.32	16.868	143.39	203.21	205.54	16.87	184.17	179.26	16.868	169.95	16.868	173.39	231.1	16.868	228.24	223.06	174.09
17.567	210.98	211.74	17.569	167.31	196.53	17.57	241.2	233.35	17.568	272	243.39	215.38	211.13	17.568	143.37	202.83	205.05	17.57	184.61	179.2	17.568	169.85	17.568	173.86	230.7	17.568	229.48	222.81	174
18.269	211.09	212.21	18.269	167.92	194.53	18.268	240.92	233.29	18.268	273.34	240.22	215.3	211.85	18.268	143.93	202.57	205.34	18.268	184.2	179.09	18.268	170.11	18.268	173.58	229.63	18.27	231.02	222.52	173.84
18.967	211.08	212.58	18.969	167.3	195.41	18.97	241.18	233.55	18.968	277.86	240.35	215.38	212.68	18.968	144.62	202.7	205.32	18.97	184.16	179.55	18.968	169.57	18.968	173.68	226.05	18.97	230.75	222.66	173.59
19.669	210.98	211.45	19.669	167.31	195.48	19.668	241.49	233.52	19.668	282.89	239.96	215.91	213.78	19.668	143.74	202.61	205.39	19.67	184.24	179.65	19.668	169.65	19.668	174.16	226.43	19.67	230.84	222.89	173.22
20.369	221.65	218.8	20.367	167.15	195.68	20.368	241.18	232.58	20.368	285.14	240.58	216.34	214.58	20.368	143.15	203.37	205.45	20.368	184.98	179.29	20.37	170.21	20.368	174.02	228.86	20.368	230.61	223.03	173.25
21.067	226.08	219.21	21.069	167.45	196.08	21.068	240.67	224.25	21.068	284.47	240.65	216.09	215	21.068	143.52	202.89	205.44	21.068	184.79	179.45	21.068	191.74	21.068	173.99	229.9	21.068	230.97	223.17	173.1
21.769	225.84	217.15	21.767	167.4	196.24	21.77	241.08	224.69	21.768	278.22	240.51	216.43	215.33	21.768	143.28	203.03	205.49	21.768	179.76	179.23	21.768	191.3	21.768	173.83	230.88	21.768	231.6	223.3	173.15
22.467	213.76	214.97	22.469	167.45	196.53	22.47	241.08	228.87	22.468	280.19	240.42	215.45	214.39	22.47	143.84	202.75	205.74	22.47	177.04	179.05	22.468	181.89	22.468	174.17	230.91	22.468	231.48	223.22	173.08
23.169	210.84	212.81	23.167	167.36	196.85	23.168	241.3	229.63	23.17	284.82	240.75	215.78	214.74	23.168	143.77	201.92	205.55	23.17	178.5	179.08	23.17	176.25	23.168	174.27	231.36	23.168	231.45	222.65	173.15
23.869	210.24	213.54	23.869	167.39	197.39	23.868	240.71	231.13	23.868	286.36	240.56	215.89	215.67	23.868	143.8	202.33	205.5	23.87	180.36	179.03	23.868	171.71	23.868	174.21	231.45	23.868	231.03	222.79	172.85
24.569	210.27	213.41	24.569	167.25	197.64	24.568	240.99	232	24.568	288.65	241.05	216.4	217.08	24.568	144.02	202.04	205.49	24.568	182.51	179.6	24.568	170.35	24.568	174.18	231.19	24.568	231.13	222.59	172.75
25.269	210.38	212.87	25.269	167.62	197.33	25.27	240.71	232.28	25.268	288.48	240.63	216.39	217.64	25.268	143.46	202.48	203.61	25.268	183.81	179.02	25.27	170.01	25.268	174.31	231.5	25.268	231.04	222.58	172.91
25.969	210.45	212	25.967	169.52	197.57	25.968	240.7	232.42	25.968	288.59	240.75	210.09	216.99	25.968	143	191.72	199.5	25.97	183.88	179.18	25.968	169.38	25.968	174.4	231.52	25.968	230.77	222.49	172.88
26.669	211.09	212.13	26.669	169.69	197.81	26.668	240.44	233	26.668	276.95	240.62	208.22	215.25	26.668	143.16	194.6	199.08	26.669	184.37	179.22	26.668	169.55	26.668	174.25	231.49	26.668	231.13	222.41	172.84
27.367	211.29	211.66	27.369	169.34	197.9	27.368	240.83	232.87	27.368	278.31	240.64	211.61	215.81	27.368	143.06	195.83	202.4	27.369	184.42	179.03	27.368	168.83	27.368	173.98	231.57	27.368	231.37	222.33	172.81
28.069	211.32	210.99	28.069	168.49	198.13	28.068	241.01	233.24	28.07	283.5	240.68	216.72	216.53	28.066	142.49	196.57	203.99	28.069	184.5	179.26	28.069	169.6	28.07	174.07	231.32	28.068	231.19	222.29	172.57
28.767	210.74	211.17	28.769	168.46	197.67	28.768	240.99	233.49	28.764	286.99	240.47	216.85	217.37	28.768	142.56	200.3	204.89	28.768	184.48	178.94	28.769	170.18	28.768	174.58	231.14	28.768	230.85	222.14	172.43
29.469	210.94	212.02	29.469	168.81	197.84	29.468	241.04	233.44	29.468	287.49	240.39	215.68	217.87	29.468	142.3	202.12	204.92	29.47	184.28	179.36	29.469	170.16	29.464	174.32	231.27	29.468	230.73	221.85	172.39
30.169	211.39	211.61	30.169	168.73	198.3	30.17	240.27	233.35	30.168	286.68	240.22	216.67	218.19	30.166	142.47	202.27	205.19	30.168	184.03	178.92	30.169	170.17	30.168	174.36	231.19	30.168	231.04	222.05	172.06
30.869	210.95	212.21	30.869	169.17	198.39	30.868	240.67	233.08	30.868	286.16	239.95	216.09	218.06	30.866	142.05	201.92	205.46	30.868	183.99	179.21	30.869	169.64	30.868	178.03	231.13	30.868	230.93	221.62	172.13
31.567	210.64	211.93	31.569	169.1	198.38	31.568	240.97	233.17	31.568	282.46	239.9	216.08	217.15	31.566	142.79	202.46	205.99	31.57	183.92	178.77	31.569	170.17	31.568	181.76	230.9	31.568	230.78	221.8	171.86
32.269	210.54	210.93	32.268	169.4	198.6	32.268	241.31	233.65	32.268	275.94	240.22	215.71	215.72	32.268	142.74	203.07	206.69	32.27	184.03	179.4	32.269	169.92	32.268	181.48	231.04	32.268	230.54	221.68	168.77
32.969	211.02	212.33	32.968	169.43	198.3	32.97	240.75	233.22	32.968	284.95	240.7	216.46	215.53	32.968	142.36	203.51	206.68	32.97	184.23	178.88	32.969	169.85	32.964	180.34	231.05	32.968	230.48	221.67	166.78
33.669	210.54	211.25	33.668	169.52	198.64	33.668	240.52	232.99	33.668	287.49	240.6	216.15	216.22	33.666	147.79	204	206.73	33.67	183.75	178.95	33.669	169.88	33.668	177.42	230.74	33.668	230.47	221.55	165.53
34.369	211.09	211.8	34.369	169.15	198.68	34.368	240.61	233.48	34.368	286.42	240.17	216	217.4	34.368	150.48	204.05	206.69	34.368	184.03	178.96	34.367	169.21	34.368	176.44	230.69	34.368	230.58	221.67	168.19
35.069	211.22	211.35	35.07	169.35	198.92	35.068	240.66	233.51	35.068	287.5	240.18	215.99	217.54	35.066	149.89	203.15	207.29	35.068	184.13	178.83	35.069	169.39	35.07	175.02	226.19	35.068	230.51	221.96	171.2
35.769	211.33	211.29	35.769	168.84	198.71	35.768	240.64	233.05	35.768	287.3	240.42	215.79	217.81	35.768	144.73	204.28	207.09	35.77	183.66	178.72	35.769	169.45	35.766	174.61	225.09	35.77	230.6	222.02	168.77
36.469	210.88	210.89	36.471	168.71	198.62	36.47	241.23	233.24	36.468	287.19	240.38	215.82	217.83	36.468	143.36	203.84	207.09	36.47	183.83	178.5	36.469	170.05	36.468	174.03	225.88	36.468	230.5	221.71	168.61
37.167	211.21	212.16	37.171	168.67	198.7	37.17	241.36	233.39	37.168	287.02	240.61	216.26	217.65	37.168	143.47	204.17	205.53	37.17	184.04	179.12	37.169	170.05	37.168	174.01	228.76	37.168	230.28	221.78	169.64
37.869	210.56	211.87	37.871	168.78	198.7	37.87	241.85	233.39	37.868	285.24	240.35	210.48	217.47	37.868	143.41	203.61	202.9	37.868	183.91	179.16	37.869	170	37.868	174.17	230.1	37.868	230.4	222.22	171.87
38.567	210.58	211.68	38.571	168.74	198.83	38.57	241.1	233.66	38.568	283.68	240.19	211.21	219.07	38.568	144.39	203.6	203.55	38.568	183.84	178.87	38.567	169.99	38.568	173.37	230.4	38.568	225.77	224.4	174.34
39.267	210.36	213.05	39.271	168.46	199	39.268	241.24	233.22	39.268	284.03	240.42	212.56	218.51	39.268	144.18	194.42	204.93	39.268	183.98	179.16	39.267	169.8	39.268	174.1	230.37	39.268	216.35	225.4	175.03
39.967	211.35	212.17	39.969	167.95	199.05	39.968	240.46	233.13	39.968	285.45	240.02	217.18	218.18	39.966	143.84	195.17	205.21	39.97	183.71	179.39	39.967	170.14	39.968	173.68	231.25	39.968	213.94	222.18	174.69
40.669	211.22	211.42	40.669	167.88	198.89	40.668	240.06	233.31	40.668	284.78	239.47	217.43	218.17	40.668	143.37	198.19	205.03	40.668	183.9	179.17	40.667	169.94	40.668	173.51	231.64	40.668	218.25	218.89	174.11
41.369	210.84	210.97	41.37	167.72	199.38	41.368	240.37	230.82	41.368	285.17	240.36	216.77	218.4	41.368	144.05	202.75	204.2	41.37	183.66	178.82	41.367	170.34	41.368	174.37	231.04	41.368	223.36	218.6	173.97
42.067	210.93	210.73	42.07	167.53	199.36	42.068	240.33	229.77	42.068	284.62	239.97	216.3	218.37	42.068	144.12	202.46	204.59	42.068	183.89	179.08	42.069	170.16	42.068	174.11	231.21	42.068	226.5	218.54	173.79
42.767	210.88	211.42	42.77	167.9	199.08	42.768	240.25	231.26	42.768	284.28	240.88	215.99	218.2	42.768	144.67	202.54	204.76	42.768	184.02	179.07	42.769	170.33	42.768	174.51	231.29	42.768	228.63	219.21	173.4
43.467	211.28	210.66	43.47	167.36	199.22	43.468	240.02	233.41	43.468	284.91	240.55	216.14	218.62	43.468	144.46	202.86	204.76	43.468	184.05	178.5	43.469	170.38	43.468	174.8	230.96	43.468	228.47	219.04	173.05
44.169	210.91	210.83	44.17	167.14	199.22	44.168	240.33	233.4	44.168	284.62	240.36	216.42	218.68	44.168	144.86	203.16	204.96	44.168	184.2	178.41	44.169	170.76	44.168	175.17	231.22	44.168	228.73	219.43	172.92
44.869	211.02	211.35	44.87	167.37	199.22	44.868	240.99	233.4	44.868	284.43	240.54	215.77	218.76	44.868	144.79	203.62	205.23	44.868	184.06	178.59	44.865	170.68	44.868	174.67	230.86	44.868	229.18	219.98	172.7
45.567	210.89	210.73	45.568	167.39	199.23	45.568	240.82	233.77	45.568	284.96	242.14	216.2	218.58	45.568	144.43	203.6	205.39	45.568	184.1	178.66	45.567	170.33	45.568	175.37	231.25	45.568	228.84	219.91	172.62
46.267	211.04	211.27	46.268	166.74	199.28	46.268	240.38	233.83	46.268	285.27	248.86	216.31	218.47	46.268	143.8	204.07	205.49	46.268	181.16	178.49	46.269	170.34	46.268	175.08	231.34	46.268	229.17	219.87	172.45
46.967	210.98	211.41	46.97	166.93	199.13	46.968	240.49	233.58	46.968	285.03	250.94	215.97	218.6	46.968	143.23	203.66	205.71	46.968	175.22	178.45	46.969	170.29	46.968	175.3	231.11	46.968	229.55	220	172.56
47.667	210.9	211.49	47.67	167.5	199.32	47.67	240.14	233.49	47.668	285.83	247.54	215.25	218.77	47.668	143.45	203.82	206.06	47.668	174.8	178.61	47.67	170.53	47.668	175.01	231.14	47.668	229.18	220	172.27
48.369	211.29	211.11	48.368	167.17	198.98	48.368	240.3	233.44	48.369	285.95	242.96	215.32	219.06	48.366	142.86	203.91	205.87	48.368	174.54	178.83	48.368	170.04	48.368	175.05	231.24	48.368	229.17	220	172.07
49.067	211.1	210.79	49.07	170.92	198.82	49.068	239.76	233.76	49.068	285.29	240.82	216	218.44	49.068	142.39	203.82	206.2	49.068	175.11	178.47	49.07	170.26	49.068	174.88	231.31	49.068	229.37	220.14	172.27
49.767	223.44	211.31	49.77	170.97	199.16	49.768	240.05	233.57	49.768	285.21	239.79	215.69	218.03	49.768	142.42	203.73	206.52	49.768	174.98	178.63	49.768	170.34	49.768	174.43	231.18	49.768	229.65	220.23	172.13
50.467	224.71	211.55	50.47	172.22	199.06	50.47	239.89	233.27	50.469	286.59	239.79	215.25	217.71	50.468	142.21	203.53	206.34	50.468	177.42	178.98	50.468	169.88	50.468	174.53	231.36	50.468	229.43	220.38	172.04
51.169	219.17	211.07	51.17	172.95	199.02	51.168	239.77	233.44	51.169	286.37	239.66	214.99	217.6	51.166	142.6	203.37	206.59	51.17	181.14	178.55	51.168	169.97	51.168	175.01	231.17	51.169	229.32	220.15	172.08
51.867	211.65	211.19	51.87	172.99	199.32	51.868	240	233.52	51.869	287.23	239.78	216.47	218.24	51.866	143.27	203.42	206.44	51.868	183.12	178.67	51.868	170.39	51.868	174.67	230.42	51.867	229.57	220.12	172.24
52.567	210.77	218.55	52.57	172.51	199.59	52.568	240.03	233.58	52.569	285.88	239.77	216.57	218.43	52.566	142.76	203.73	206.64	52.57	183.68	178.42	52.57	169.92	52.568	172.42	228.75	52.567	229.28	220.42	171.95
53.267	210.44	219.3	53.27	171.48	199.42	53.268	240.16	233.7	53.271	285.64	239.25	213.76	218.52	53.268	142.72	203.67	206.46	53.268	184.01	178.58	53.268	170.24	53.268	179.58	226.92	53.269	229.4	220	171.82
53.967	210.53	216.58	53.97	170.42	199.24	53.968	239.96	233.65	53.969	280.92	239.08	210.16	218.4	53.966	143.16	203.46	206.49	53.968	184.55	178.67	53.968	170.79	53.968	182.38	226.64	53.969	229.37	220.17	171.5
54.667	210.61	215.65	54.67	170.05	199.22	54.668	240.33	233.39	54.669	262.85	238.96	210.43	213.44	54.666	142.93	204.12	206.38	54.668	185.19	178.91	54.668	169.84	54.67	182.63	227.8	54.667	229.6	219.88	171.54
55.369	210.59	212.67	55.368	169.06	199.27	55.368	240.08	233.64	55.369	266.26	239.37	215.58	211.63	55.368	142.83	203.65	206.75	55.368	185.07	178.83	55.368	170.14	55.368	181.71	230.22	55.369	229.7	220.18	167.44
56.067	210.18	211.09	56.07	168.88	199.1	56.068	240.71	233.73	56.069	272.81	239.6	218.24	212.75	56.066	143.27	203.65	206.42	56.069	184.84	178.49	56.068	169.8	56.066	179.07	231.26	56.069	229.7	220.1	166.91
56.769	210.19	212.82	56.768	168.96	199.07	56.768	239.46	233.86	56.769	280.92	239.17	217.55	214.24	56.768	143.51	203.63	206.56	56.768	184.95	178.37	56.768	170.65	56.766	177.68	230.98	56.769	229.51	220.38	166.52
57.467	210.21	212.36	57.47	169.11	198.94	57.47	238.37	233.95	57.469	284.92	239.35	218.14	215.41	57.466	143.41	203.56	206.91	57.469	185.04	178.62	57.468	170.48	57.466	175.89	231.36	57.469	229.33	220.01	168.3
58.167	210.54	211.53	58.17	168.67	198.87	58.17	238.59	233.85	58.169	284.64	239.53	217.28	215.75	58.167	143.09	203.22	206.67	58.171	184.85	178.98	58.168	170.74	58.168	176.5	231.21	58.169	223.85	220.06	167.16
58.867	210.51	210.81	58.87	168.77	199.07	58.87	238.79	234.1	58.863	284.82	239.17	217.31	216.19	58.867	142.14	203.5	207.17	58.868	184.32	179.1	58.868	170.37	58.868	176.08	231.14	58.869	214.99	222.18	167.21
59.568	210.56	209.62	59.57	167.93	198.85	59.568	234.81	234.02	59.569	284.17	239.49	217.56	216.56	59.569	149.29	203.23	207.15	59.569	184.87	178.63	59.568	170.53	59.566	175.5	231.3	59.569	212.68	224.37	169.45
60.267	212.71	209.51	60.27	167.93	198.89	60.268	235.71	233.77	60.267	283.82	239.55	216.92	216.26	60.269	150.35	203.89	206.83	60.271	184.82	178.71	60.268	170.5	60.266	175.07	231.27	60.269	215.82	222.55	171.9
60.968	222.74	210.15	60.97	168.46	198.92	60.968	235.51	233.93	60.969	285.27	240	217	216.85	60.967	147.24	204.05	206.76	60.969	184.91	178.89	60.968	170.34	60.966	174.2	230.94	60.97	221.61	218.34	172.75
61.668	221	209.54	61.67	168.32	198.68	61.668	237.78	233.66	61.667	284.33	239.74	216.91	217.04	61.669	145.54	203.87	206.64	61.669	184.4	178.23	61.668	169.91	61.667	174.04	231.1	61.667	226.75	218.27	173.17
62.368	215.05	209.74	62.368	167.81	199.04	62.368	238.91	233.65	62.369	286.2	240.07	218.06	216.9	62.367	146.17	203.26	206.86	62.369	184.63	184.01	62.368	169.72	62.367	173.84	230.59	62.367	228.37	218.15	173.18
63.068	211.54	210.97	63.07	168	198.95	63.069	239.53	233.71	63.067	285.58	246.76	217.94	217.1	63.068	145.03	203.9	206.47	63.069	184.67	188.98	63.068	169.77	63.067	173.93	230.77	63.068	228.91	218.81	173.16
63.768	210.7	210.38	63.768	168.18	198.73	63.768	239.75	233.79	63.769	285.38	250.1	217.14	217	63.768	144.07	203.4	201.04	63.769	184.54	186.36	63.768	170.17	63.767	174.16	230.72	63.767	229.21	218.6	172.93
64.468	210.57	210.46	64.468	167.87	198.85	64.468	240.09	234.12	64.467	285.89	250.11	217.08	217.38	64.47	145.07	200.21	198.61	64.469	184.21	189.37	64.468	169.66	64.467	174.17	231.02	64.468	229.46	218.99	172.83
65.168	209.93	210.84	65.17	168.2	198.86	65.169	240.23	231.63	65.169	284.1	243.76	216.65	217.33	65.168	145.3	194.13	201.27	65.169	176.91	190.49	65.168	170.59	65.167	174.47	230.65	65.168	229.48	219.07	172.87
65.87	209.84	210.63	65.868	168.11	198.9	65.868	240.28	222.47	65.869	285.21	240.83	217.05	217.23	65.868	144.8	196.1	204.82	65.869	176.86	186	65.868	170.44	65.867	174.75	230.83	65.868	229.27	218.98	172.62
66.57	210.08	211.62	66.568	168.07	199.14	66.569	239.89	223.33	66.569	283.82	240.17	215.79	217.19	66.568	143.61	197.1	204.97	66.569	176.59	186.99	66.568	170.03	66.567	174.4	230.82	66.568	229.72	219.4	172.56
67.268	209.78	211.2	67.268	168.39	198.76	67.269	239.99	225.06	67.269	285.02	239.95	215.69	217.26	67.268	144.09	197.2	204.42	67.269	179.1	187.73	67.268	170.13	67.267	174.28	230.98	67.27	229.54	219.54	172.18
67.968	210.14	211.3	67.968	168.6	198.87	67.968	239.79	228.39	67.967	284.72	240.42	215.16	217	67.968	143.72	199.83	204.35	67.969	181.86	182.4	67.969	170.08	67.967	174.54	231.14	67.968	229.81	219.64	172.23
68.668	209.98	211.53	68.668	168.65	198.51	68.669	239.98	229.95	68.669	284.49	240.69	216.2	217.05	68.668	144.71	201.43	204.98	68.671	182.9	179.96	68.668	169.86	68.669	174.52	230.56	68.668	229.64	219.67	171.8
69.368	210.13	211.59	69.37	168.07	198.35	69.369	240.05	231.39	69.367	282.48	240.93	216.31	218.61	69.368	144.67	201.83	204.93	69.365	183.33	179.08	69.369	170.02	69.367	175.18	230.65	69.37	229.72	219.56	171.98
70.07	210.71	211.61	70.068	168.25	198.15	70.069	240.1	232.01	70.069	273.35	240.94	216.38	215.75	70.068	144.23	202.13	205.24	70.069	183.81	178.03	70.071	170.07	70.068	174.99	230.64	70.068	229.59	219.55	171.81
70.768	210.69	211.72	70.768	168.3	198.26	70.765	239.9	232.38	70.769	277.3	240.57	216.95	214.16	70.768	144.6	202.91	205.07	70.769	183.91	178.08	70.769	170.1	70.768	175.42	230.37	70.768	229.53	219.5	171.86
71.47	210.51	211.61	71.468	168.08	198.61	71.469	240.25	232.67	71.469	285.72	240.61	216.92	215.65	71.468	144.36	203.39	205.21	71.469	183.84	177.81	71.469	170.61	71.467	175.48	230.82	71.468	229.31	219.73	172.06
72.168	211.01	210.79	72.168	168.05	198.69	72.169	240.06	232.71	72.169	286.01	239.99	216.74	216.9	72.168	144.71	203.5	205.47	72.169	183.75	177.84	72.169	170.13	72.168	175.45	230.61	72.168	229.55	219.71	171.76
72.868	211.29	211.43	72.87	168.24	198.45	72.869	239.83	232.79	72.869	285.22	240.63	216.55	216.76	72.868	145.42	203.78	205.73	72.869	184.26	178.19	72.869	170.31	72.864	175.48	231.17	72.868	229.55	219.82	171.67
73.568	211.1	211.21	73.57	167.76	198.47	73.569	239.75	232.7	73.567	284.67	240.17	216.4	216.67	73.568	145.44	203.6	205.51	73.569	184.02	178.13	73.569	169.91	73.568	174.94	230.61	73.568	229.57	219.6	171.63
74.268	211.25	211.32	74.268	167.99	198.54	74.265	239.88	233.21	74.269	283.11	240.55	216.28	216.97	74.268	145.45	203.83	205.64	74.269	184.25	178.03	74.271	169.57	74.268	175.2	230.24	74.268	229.43	219.73	171.73
74.968	221.49	211.58	74.97	168.67	198.81	74.969	239.83	233.07	74.969	283.47	240.28	216.29	216.69	74.968	145.2	203.99	205.72	74.969	184.47	178.59	74.971	170.49	74.968	174.76	230.32	74.968	229.58	219.58	171.2
75.67	224.37	211.85	75.668	169.04	198.55	75.669	239.79	233.29	75.669	282.38	243.75	217.04	216.95	75.668	144.99	204.26	206.21	75.669	183.77	178.15	75.671	170.17	75.67	175.09	230.23	75.67	229.51	219.93	171.07
76.37	221.54	212.39	76.368	172.01	198.65	76.371	240.2	233.28	76.369	284.05	246.49	209.54	217.04	76.368	144.65	204.01	206.01	76.369	183.61	178.45	76.369	170.71	76.368	174.68	229.91	76.368	229.22	220.04	171.4
77.068	214.51	212.05	77.068	172.92	198.52	77.069	240.9	233.2	77.069	282.82	248.42	208.67	217.06	77.068	144.33	203.37	205.72	77.069	183.85	178.23	77.069	170.89	77.068	173.75	230.31	77.068	229.37	219.82	171.63
77.768	211.39	211.71	77.768	173.17	198.46	77.771	240.19	233.75	77.769	281.53	250.1	210.03	217.2	77.768	144.5	203.55	205.8	77.769	183.82	178.52	77.769	170.71	77.768	174.16	230.56	77.768	229.76	219.7	171.44
78.468	211.05	211.3	78.468	173.63	198.92	78.469	240.05	233.25	78.469	279.44	246.39	213.97	217.26	78.468	143.42	203.48	206.22	78.471	184.29	178.86	78.469	170.16	78.468	174.24	230.53	78.468	229.67	219.96	171.67
79.168	211.56	211.25	79.17	171.93	198.46	79.171	239.8	233.44	79.169	279.96	243.7	217.29	217.12	79.168	143.14	203.6	206.31	79.171	183.89	178.46	79.169	169.97	79.168	174.36	230.81	79.168	229.44	220.11	172
79.868	210.97	211.51	79.87	171.17	198.26	79.869	240.16	233.5	79.869	280.73	242.58	216.83	217.31	79.868	143.59	203.73	206.52	79.865	181.9	178.53	79.869	169.57	79.864	174.22	230.42	79.868	229.45	219.99	171.8
80.568	211.46	211.99	80.568	170.36	198.62	80.569	240.11	233.24	80.567	282.09	240.99	217.44	217.42	80.568	143.79	203.97	206.78	80.567	175.98	178.23	80.569	169.42	80.568	173.77	230.87	80.568	228.98	219.71	171.9
81.268	211.04	211.81	81.268	170.28	198.61	81.265	239.61	233.54	81.269	281.79	241.32	216.52	218	81.268	143.65	204.19	206.75	81.269	176.54	178.53	81.269	168.59	81.268	173.92	230.6	81.27	215.79	219.78	172.4
81.968	210.73	211.61	81.968	169.27	198.73	81.969	239.3	233.25	81.967	281.66	240.68	216.76	217.79	81.968	143.63	203.91	206.31	81.969	177.3	178.03	81.97	169.83	81.968	173.82	230.55	81.968	211.96	219.37	171.97
82.668	210.37	212.09	82.668	169.23	198.71	82.669	239.03	233.32	82.667	281.7	240.79	216.63	217.47	82.668	143.32	203.79	206.65	82.669	179.75	178.9	82.67	169.87	82.668	172.99	230.41	82.67	213.51	224.18	171.92
83.368	210.71	211.52	83.368	168.92	198.74	83.369	238.47	233.76	83.367	279.79	241.18	217.14	217.59	83.368	143.76	203.44	206.66	83.369	182.21	178.91	83.37	169.26	83.364	173.02	230.53	83.368	219.17	223.2	172.03
84.068	210.74	211.02	84.07	168.79	198.77	84.069	239.3	233.42	84.069	278.48	241.37	216.66	217.38	84.068	143.7	203.79	206.47	84.069	183.07	178.66	84.068	169.27	84.068	173.55	230.46	84.068	223.95	219.33	172.02
84.768	210.38	211.72	84.768	168.9	198.26	84.765	239.62	233.58	84.767	279.93	241.27	216.62	218	84.768	143.51	203.6	206.65	84.769	183.73	178.11	84.77	169.31	84.768	173.72	230.74	84.768	226.14	218.17	171.86
85.468	210.95	211.98	85.468	169.23	198.64	85.469	239.65	233.38	85.467	280.29	240.96	216.54	217.91	85.468	143.7	203.66	206.71	85.469	184.48	178.83	85.47	169.27	85.468	173.3	230.74	85.468	227.55	218.25	171.8
86.168	210.74	211.63	86.168	168.76	198.96	86.169	239.57	233.35	86.169	283.43	240.92	215.25	217.81	86.168	144.06	193.42	206.27	86.169	184.56	179.17	86.17	169.43	86.168	173.33	230.55	86.168	227.22	218.59	171.93
86.868	210.85	211.11	86.87	168.9	199.3	86.869	239.75	233.75	86.867	265.35	241.52	215.93	213.99	86.868	143.85	194.35	202.42	86.865	184.68	179.03	86.868	168.9	86.868	173.11	230.5	86.868	227.88	218.78	171.98
87.568	211.54	211.94	87.568	168.45	198.91	87.569	240.09	233.31	87.567	267.68	241.13	215.99	211.26	87.568	144.44	195.72	199.66	87.569	184.6	179.32	87.568	168.99	87.568	173.4	231.33	87.568	228.46	219.02	171.86
88.268	211.61	211.96	88.27	168.65	198.58	88.269	239.86	233.68	88.269	278.3	241.23	215.66	212.42	88.268	144.32	197.61	202.05	88.269	184.18	178.44	88.27	169.77	88.268	173.39	228.19	88.268	228.85	219.23	172.33
88.968	211.19	211.46	88.968	168.65	198.91	88.969	239.38	233.59	88.967	283.36	240.74	215.04	214.42	88.968	143.94	200.73	205.17	88.969	184.47	179.97	88.97	170.32	88.968	173.62	226.8	88.968	228.9	219.5	171.94
89.67	211.08	211.41	89.669	168.53	198.92	89.669	239.38	233.74	89.669	283.6	240.84	214.32	215.7	89.67	143.76	202.19	204.71	89.669	184.28	188.35	89.67	170.52	89.67	173.38	227.46	89.668	228.71	219.55	172.2
90.368	211.2	213.67	90.368	168.3	198.71	90.369	239.51	233.42	90.369	284.41	240.74	215.1	216.1	90.366	144.3	202.59	205.16	90.369	184.48	187.88	90.37	169.87	90.368	173.24	228.42	90.368	228.83	219.83	172.27
91.068	220.07	218.38	91.069	169.12	198.72	91.069	239.4	233.75	91.069	283.14	240.97	214.21	216.04	91.066	143.66	203.04	205.07	91.069	179.17	183.86	91.07	169.49	91.068	172.71	231.12	91.068	228.95	219.96	172.28
91.768	226.35	215.62	91.769	168.62	198.86	91.765	239.6	228.41	91.769	282.98	240.65	214.27	216.47	91.768	143.15	203.57	204.95	91.769	175.91	178.55	91.77	170.19	91.768	173.4	231.3	91.768	229.24	219.9	172.06
92.468	222.62	216.77	92.469	168.77	198.73	92.469	239.54	225.1	92.469	283.21	240.95	213.42	216.54	92.468	147.76	203.7	205.52	92.469	176.45	177.83	92.47	169.78	92.469	173.63	231.79	92.468	228.89	220.05	172.35
93.17	214.55	214.07	93.169	168.45	198.62	93.169	239.7	228.13	93.169	283.72	240.54	213.74	216.41	93.168	151.28	203.62	205.13	93.169	179.94	179.37	93.17	169.7	93.169	175.95	231.4	93.168	229.33	219.97	172.24
93.868	212.53	211.58	93.869	168.68	198.73	93.869	239.66	230.81	93.869	283.59	240.59	213.73	216.5	93.868	149.36	203.4	205.38	93.869	182.21	177.8	93.87	169.68	93.863	181.29	231.53	93.868	229.17	219.92	172.46
94.568	211.06	212.63	94.571	168.72	198.75	94.566	239.47	231.78	94.569	284.56	240.92	213.75	216.38	94.568	144.2	203.14	205.63	94.569	183.26	178.95	94.57	170.13	94.569	182.02	231.97	94.568	229.59	220.03	172.02
95.268	211.28	213.66	95.271	169.67	198.76	95.264	240.05	232.58	95.269	282.25	241.39	214.16	216.5	95.266	144	203.58	206.04	95.269	183.53	178.92	95.27	170.12	95.269	181.54	232.11	95.268	229.64	219.99	172.26
95.968	210.96	213.39	95.969	170.86	198.52	95.968	240.12	232.26	95.969	282.63	241	213.73	216.69	95.968	143.92	203.87	206.5	95.969	184.42	178.41	95.97	169.6	95.968	177.35	232.2	95.968	229.12	220.15	172.17
96.67	210.58	212.92	96.669	170.72	198.88	96.67	239.39	232.56	96.667	282.69	240.98	214.02	216.93	96.666	143	201.99	204.39	96.669	184.12	178.23	96.668	169.66	96.668	175.8	232	96.668	229.33	220.29	172.07
97.368	210.67	211.89	97.369	170.38	198.86	97.37	239.91	232.74	97.367	282	241.27	214.6	217.48	97.368	144.16	202.32	204.35	97.365	184.48	178.36	97.368	169.63	97.364	175.98	231.43	97.368	221.98	223.57	172.26
98.068	210.74	211.25	98.069	171.77	198.65	98.068	240.09	232.87	98.069	280	240.8	208.2	217.28	98.066	144.54	202.42	204.4	98.069	184.07	178.25	98.068	169.93	98.068	175.36	231.21	98.068	216.18	223.36	172.17
98.768	210.22	210.86	98.769	171.35	198.64	98.764	239.64	232.52	98.769	280.29	241.21	208.36	216.42	98.768	144.1	202.19	204.52	98.769	183.9	178.37	98.77	169.72	98.768	174.71	231.52	98.768	215.17	220.97	172.23
99.47	210.74	211.11	99.469	170.3	198.94	99.464	239.9	233.05	99.469	282.24	241.94	213.53	217.67	99.468	143.4	202.48	204.3	99.469	178.44	178.33	99.47	169.68	99.468	175.03	231.08	99.468	218.72	217.99	169.55
100.168	210.64	211.29	100.169	170.3	198.88	100.168	239.69	232.95	100.169	282.06	241.32	215.62	217.36	100.168	143.06	202.12	204.36	100.169	175.93	178.43	100.17	169.67	100.168	174.54	231.32	100.17	224.12	217.6	167.35
100.868	210.18	210.94	100.871	169.78	198.65	100.87	239.86	232.91	100.867	281.06	241.35	216.8	216.92	100.866	143.34	202.59	204.64	100.869	177.61	178.94	100.868	170.31	100.868	174.14	230.93	100.868	227.46	218.2	166.49
101.568	211.08	210.69	101.569	169.68	198.69	101.568	239.74	233.19	101.567	282.71	240.66	216.43	216.84	101.566	143.43	202.27	204.98	101.569	180.75	178.94	101.568	170.17	101.568	174.89	230.85	101.568	228.95	218.1	166.63
102.268	211.45	210.57	102.269	169.58	198.65	102.264	239.72	233.32	102.267	281.16	241.27	215.33	217.06	102.268	143.89	197.57	204.8	102.269	182.57	178.68	102.268	169.54	102.268	174.46	230.99	102.268	229.82	218.46	169.65
102.968	211.56	210.91	102.971	169.89	198.54	102.97	239.94	233.41	102.969	280.12	243.96	215.36	217.18	102.968	143.71	192.16	201.7	102.969	183.9	178.82	102.968	169.55	102.968	174.63	230.98	102.968	229.62	218.78	171.81
103.668	210.97	210.41	103.669	169.41	198.48	103.668	240.6	233.28	103.667	277.86	250.05	215.26	217.32	103.668	143.7	194.13	198.99	103.669	183.86	178.55	103.668	170.37	103.668	174.73	231.3	103.668	230.04	218.93	172.5
104.368	211.33	211.15	104.369	169.04	198.57	104.37	240.06	233.44	104.369	281.38	250.14	214.47	216.89	104.368	143.27	197.99	200.85	104.365	183.77	178.72	104.368	169.9	104.362	174.52	231.04	104.368	230.08	219.24	172.46
105.068	211.33	211.59	105.069	169.13	198.4	105.068	240.35	233.27	105.069	282.25	246.88	215.01	217.3	105.068	142.88	201.48	203.66	105.067	183.66	178.43	105.068	169.92	105.068	174.47	231.68	105.068	228.81	219.27	173.14
105.768	214.7	211.11	105.769	169.04	198.41	105.764	239.68	233.74	105.767	283.39	243.3	215.16	216.96	105.768	142.73	201.39	203.36	105.769	183.73	178.28	105.768	170.18	105.768	174.21	230.71	105.768	222.17	219.1	173.22
106.468	225.57	210.5	106.469	168.83	198.4	106.47	239.85	233.71	106.468	282.75	240.37	215.03	217.13	106.468	141.85	201.5	203.49	106.469	183.91	178.38	106.47	169.86	106.468	174.29	227.54	106.468	222.39	219.36	173.42
107.168	225.21	210.82	107.171	168.59	198.59	107.168	239.97	233.81	107.168	282.73	238.96	215.58	217.18	107.168	141.37	201.44	203.55	107.169	184.23	178.36	107.17	170.15	107.168	174.59	227.02	107.168	226.51	219.4	173.2
107.868	216.74	211.41	107.869	168.53	198.83	107.87	240.48	233.95	107.867	283.07	238.78	214.82	216.82	107.868	141.58	201.95	203.6	107.865	180.76	178.75	107.87	170.52	107.868	174.18	229.57	107.868	228.14	219.38	173.25
108.568	212.45	210.4	108.569	168.69	199	108.568	240.03	233.57	108.568	275.43	239.34	214.06	216.37	108.568	141.65	202.72	203.59	108.569	175.74	178.18	108.568	169.87	108.564	174.38	231.44	108.568	229.63	219.49	172.94
109.268	210.67	210.44	109.269	168.91	198.86	109.27	239.58	229.45	109.27	266.68	239.4	213.86	214.16	109.268	141.83	202.44	203.93	109.269	175.42	178.54	109.268	170.11	109.268	174.55	231.65	109.268	230	219.6	172.93
109.968	211.51	210.46	109.969	168.22	198.61	109.968	239.85	228.96	109.968	273.25	239.79	213.65	214.67	109.968	144.76	200.29	203.99	109.969	177.9	178.67	109.968	170.46	109.968	174.81	231.75	109.968	230.51	219.54	172.78
110.668	211.19	211.11	110.669	168.4	198.61	110.67	239.7	231.06	110.668	278.29	240.11	214.07	215.81	110.668	149.79	195.88	202.05	110.669	180.96	178.84	110.668	170.03	110.668	174.59	231.79	110.668	230.58	219.94	172.68
111.368	211.44	210.62	111.369	168.7	198.64	111.368	239.9	232.71	111.368	280.8	240.19	213.55	215.95	111.368	148.7	198.32	200.8	111.365	182.81	178.67	111.368	170.6	111.368	174.17	231.73	111.37	230.7	220.3	172.71
112.068	211.21	210.73	112.069	168.6	198.62	112.068	240.11	232.96	112.07	280.97	240.4	214.4	216.82	112.066	145.47	201.7	202.1	112.068	183.14	178.87	112.068	190.13	112.068	174.49	232.09	112.068	230.78	219.95	173.04
112.768	210.51	210.73	112.769	168.91	198.45	112.764	239.84	232.53	112.77	279.84	240.9	213.85	216.6	112.766	143.01	201.6	202.7	112.771	183.69	178.78	112.768	195.29	112.77	174.37	231.79	112.768	230.72	220.24	173.01
113.468	210.35	211.13	113.469	168.81	198.72	113.468	239.72	232.85	113.47	278.47	240.68	213.57	217.01	113.467	142.3	201.44	202.91	113.469	183.95	179	113.468	190.28	113.47	174.85	232.12	113.468	230.56	220.26	172.93
114.168	210.35	210.51	114.169	168.88	198.57	114.168	239.64	232.69	114.17	277.17	240.74	213.52	217.29	114.166	144.4	201.52	203.05	114.171	183.99	178.21	114.17	182.71	114.168	174.48	231.8	114.168	230.79	220.2	172.91
114.868	210.13	211.36	114.869	169.02	198.22	114.87	240.15	232.83	114.864	278.74	240.79	214.34	217.08	114.867	142.79	201.8	203.16	114.865	184.1	181.7	114.868	176.71	114.868	174.18	231.85	114.868	230.55	219.94	172.83
115.565	210.03	210.51	115.571	169.35	198.52	115.568	240.37	232.72	115.568	279.71	241.47	213.94	217.07	115.569	143.1	201.68	202.92	115.569	183.65	189.27	115.568	172.32	115.568	174.47	231.86	115.568	230.27	220.47	172.94
116.269	209.84	210.67	116.269	169.38	198.37	116.264	240.23	232.6	116.27	280.19	240.47	214.51	217.21	116.269	143.28	201.92	203.43	116.269	183.76	186.34	116.27	171.68	116.27	174.6	231.96	116.269	230.39	220.25	173.05
116.968	209.81	209.92	116.969	169.24	198.46	116.97	240.26	232.87	116.968	280.93	241.21	215.23	217.36	116.967	143.65	202.24	203.12	116.971	184.19	182.8	116.97	171.64	116.968	174.41	232.28	116.968	230.76	220.06	172.79
117.665	210.89	210.15	117.669	168.71	198.55	117.67	240.58	232.91	117.67	281.72	240.88	216.11	216.71	117.667	143.83	202.14	203.66	117.671	184.24	178.77	117.67	170.85	117.67	174.71	231.92	117.668	230.55	222.62	173.05
118.369	210.9	216.04	118.369	168.94	198.46	118.369	240.4	232.66	118.37	281.66	240.79	215.12	216.63	118.367	143.71	202.49	203.9	118.365	183.74	178.27	118.368	171.09	118.364	174.35	231.68	118.369	230.85	224.65	173.15
119.071	211.37	219.09	119.069	168.84	198.46	119.068	240.77	232.7	119.068	281.97	241.1	214.6	216.75	119.067	143.23	202.75	203.79	119.069	183.71	178.53	119.068	171.99	119.064	173.85	231.76	119.068	222.18	222.74	172.94
119.769	210.39	217.28	119.769	168.98	198.39	119.768	239.99	232.57	119.77	280.78	241.15	214.86	216.85	119.769	143.08	202.45	203.64	119.769	184.42	177.95	119.768	172.16	119.768	173.99	232.05	119.769	216.9	219.52	173.23
120.465	210.17	213.49	120.469	168.85	198.53	120.469	239.87	232.92	120.47	280.28	240.98	214.72	217.09	120.469	143.57	202.57	203.69	120.471	183.81	178.39	120.468	172.19	120.468	173.63	232.07	120.471	216.73	218.36	171.25
121.169	209.82	212.32	121.171	170.49	198.45	121.168	240.14	232.92	121.168	281.89	240.7	214.96	217.23	121.169	143.83	202.57	203.76	121.171	184.09	178.55	121.168	171.75	121.168	173.52	231.63	121.169	222.76	218.45	168.2
121.871	223.09	211.76	121.869	171.11	198.33	121.869	240.7	233.2	121.864	281.34	240.76	215.64	217.1	121.867	143.98	202.85	203.58	121.871	183.96	178.19	121.868	171.84	121.864	173.65	231.65	121.871	227.52	219.03	167.22
122.569	223.41	212.22	122.571	171.99	198.64	122.568	240.73	232.93	122.57	281.93	240.51	212.27	217.61	122.569	143.93	202.17	203.85	122.569	184.3	177.69	122.568	171.17	122.566	174.08	231.75	122.57	229.4	218.82	167.37
123.269	221.38	213.18	123.269	172.87	198.56	123.269	240.13	233.01	123.27	282.54	241.2	208	216.76	123.269	143.87	202.31	204.01	123.27	184.45	178.2	123.269	171.51	123.268	173.5	231.9	123.27	229.51	219.71	170.61
123.969	212.44	212.39	123.971	172.54	198.7	123.969	239.78	233.14	123.968	282.62	241.17	208.95	214.83	123.969	143.37	202.54	204.22	123.968	184.36	178.27	123.969	171.66	123.968	173.92	231.81	123.968	230	219.26	172.79
124.669	210.22	212.46	124.669	172.25	198.37	124.669	240.01	233.15	124.668	281.43	241.12	215.13	214.85	124.669	143.75	202.63	204.3	124.67	178.1	178.14	124.669	171.89	124.668	174.01	231.65	124.664	230.08	219.7	173.22
125.369	208.97	212.03	125.369	171.27	198.64	125.369	239.96	229.74	125.368	279.32	241.59	216.28	216.05	125.369	142.94	202.19	204.39	125.364	176.26	178.4	125.369	171.52	125.368	174	231.74	125.368	230.6	219.76	173.29
126.069	209.69	211.48	126.069	170.52	199.26	126.069	240.18	227.56	126.068	281.38	241.01	216.93	216.52	126.069	143.3	191.73	204.15	126.068	175.86	178.75	126.069	172.11	126.066	174.41	232.19	126.068	230.03	219.84	173.57
126.769	209.36	211.84	126.767	170.99	196.19	126.769	240.05	230.42	126.768	281.34	241.17	216.2	216.26	126.769	142.71	195.79	199.88	126.768	175.46	178.68	126.769	172.05	126.766	174.23	232.18	126.77	230.08	219.74	173.53
127.469	209.42	211.74	127.469	170.24	194.27	127.469	239.93	231.56	127.468	281.03	241.18	216.35	216.08	127.469	142.62	195.69	199.69	127.468	176.32	179.04	127.469	171.54	127.466	173.73	231.59	127.469	230.79	219.85	173.26
128.165	210.23	210.95	128.169	169.74	194.11	128.169	239.72	232.32	128.168	280.95	241.29	217.09	216.2	128.169	142.57	196.72	202.29	128.17	180.44	178.34	128.169	171.96	128.169	173.71	227.43	128.165	231.17	220.01	173.03
128.869	209.95	211.56	128.869	169.75	194.8	128.869	239.75	232.35	128.868	282.51	241.69	216.49	216.72	128.869	142.51	199.41	203.02	128.864	182.56	178.71	128.869	172.31	128.869	173.76	227.13	128.865	230.7	220.05	173.34
129.569	210.31	212.16	129.569	169.79	194.84	129.569	239.73	232.55	129.568	279.75	241.61	216.07	216.8	129.567	142.56	200.95	202.76	129.568	183.85	179.02	129.569	172.27	129.567	174.05	226.91	129.569	230.75	220.19	173.32
130.269	210.38	211.25	130.269	169.52	195.36	130.269	240.07	232.63	130.268	279.76	241.71	216.73	216.82	130.269	142.95	202.02	202.68	130.268	184.53	178.59	130.269	172.52	130.267	174.23	230.16	130.289	230.31	220.32	173.45
130.969	210.15	211.79	130.969	169.62	195.87	130.969	240.28	233.16	130.968	279.97	240.91	216.38	217.14	130.969	143.37	202.39	202.91	130.968	184.42	178.69	130.969	172.17	130.969	174.32	231.81	131.143	230.42	220.5	173.54
131.669	209.87	211.03	131.669	169.46	196.14	131.669	239.88	232.57	131.67	279.98	240.44	216.16	216.77	131.669	143.74	202.33	202.83	131.67	184.87	178.41	131.669	172.31	131.669	173.46	232.18	131.763	230.49	220.4	173.42
132.369	209.57	211.23	132.369	169.47	196.91	132.369	239.84	233.07	132.368	282.54	240.96	215.95	216.65	132.367	149.22	201.97	203.23	132.37	184.27	178.01	132.369	172.52	132.365	173.73	232.05	132.383	230.47	220.44	173.4
133.069	209.71	211.12	133.069	169.21	196.93	133.069	239.78	232.59	133.068	282.44	241.25	215.48	216.67	133.069	149.56	202.72	203.67	133.068	184.87	178.43	133.069	172.25	133.069	173.79	231.88	133.069	230.7	220.42	173.1
133.771	209.9	211.42	133.769	168.88	196.91	133.769	239.89	232.96	133.764	281.56	241.24	216.87	217.08	133.769	145.43	202.52	203.44	133.768	184.72	178.06	133.769	172.11	133.769	174.31	231.47	133.769	230.06	221.02	173.11
134.469	210.26	210.97	134.469	169	197.35	134.469	239.98	232.87	134.468	280.74	241.77	217.04	217.06	134.467	143.49	202.99	203.9	134.47	183.12	178.5	134.469	172.16	134.465	173.92	232.08	134.469	230.64	220.98	173.09
135.169	211.21	210.9	135.169	169.04	197.24	135.169	239.84	233.19	135.168	276.53	241.81	216.3	216.46	135.167	143.8	202.92	203.47	135.17	177.67	178.59	135.169	172.35	135.169	174.18	232.13	135.169	230.74	220.19	173.07
135.869	218.91	210.6	135.869	168.79	197.38	135.869	240.17	233.33	135.868	277.17	241.64	216.12	216.28	135.867	143.45	203.19	203.55	135.864	178.05	177.89	135.869	171.75	135.865	174.1	232.32	135.869	227.23	221.13	173.41
136.569	225.91	210.89	136.569	168.52	197.47	136.569	240.35	233.55	136.568	278.63	241.23	215.91	216.1	136.567	143.49	203.12	203.97	136.569	180.54	178.5	136.569	171.89	136.569	174.07	232.44	136.569	218.6	221.2	172.99
137.269	221.91	211.23	137.269	168.98	197.49	137.269	240.5	233.59	137.268	280.09	241.79	215.41	216.14	137.267	143.78	202.5	203.9	137.269	182.65	178.17	137.269	172.12	137.269	173.98	231.99	137.269	216.09	221.1	172.98
137.969	216.53	211.09	137.969	168.64	197.69	137.967	239.95	233.46	137.968	280.57	241.38	215.07	216.46	137.969	144.85	203.33	203.91	137.969	183.65	186.48	137.971	172.79	137.969	174.24	232.24	137.969	219.25	221.32	173.05
138.671	213.98	211.31	138.669	168.41	198.03	138.669	239.9	233.22	138.668	281.74	241.86	214.6	216.47	138.667	145.16	202.92	204.01	138.671	184.29	189.53	138.669	172.79	138.669	173.97	232.36	138.669	223.21	221.18	173.08
139.369	210.85	211.31	139.369	168.38	198.11	139.371	240.15	233.72	139.368	281.26	247.45	214.53	216.93	139.369	144.7	203.31	204.39	139.365	184.62	185.61	139.369	172.27	139.363	173.46	232.2	139.369	226.91	221.23	173.05
140.069	211.19	211.41	140.069	168.59	198.08	140.069	239.96	233.56	140.068	281.19	248.38	214.5	216.48	140.067	144.5	203.57	204.26	140.069	184.47	179.82	140.069	172.95	140.067	174.03	232.21	140.069	228.1	221.36	173.38
140.769	210.48	211.81	140.769	168.71	198.29	140.771	240.23	233.8	140.77	278.15	247.19	214.39	216.49	140.769	143.64	202.99	204.25	140.769	184.36	178.07	140.769	172.65	140.767	174.44	232.28	140.769	229.17	221.26	172.94
141.469	210.75	211.3	141.469	168.49	198.45	141.469	240.11	234.01	141.468	279.53	243.58	214.56	216.5	141.467	143.7	203.07	204.28	141.471	178.09	178.2	141.467	171.86	141.467	174.07	232.3	141.469	230.1	221.39	173.47
142.169	210.44	212.04	142.169	168.76	196.7	142.169	239.67	233.58	142.17	278.05	241.04	214.84	217.33	142.167	143.22	202.63	204.38	142.171	177.67	177.57	142.169	172.06	142.169	174.52	232.67	142.169	230.46	221.69	173.34
142.869	210.42	215.13	142.869	168.54	195.62	142.869	239.83	233.68	142.864	278.2	239.14	216.06	216.83	142.867	143.94	203.36	205.02	142.863	179	177.78	142.869	172.12	142.863	174.59	229.87	142.869	230.63	221.72	173.37
143.565	209.71	217.97	143.569	168.7	194.77	143.569	240.17	233.75	143.568	279.29	238.43	216.76	217.14	143.569	143.79	203.19	204.53	143.567	182.23	178.34	143.569	171.6	143.567	174.24	228.04	143.569	231.04	221.71	173.36
144.265	209.53	216.63	144.27	169.92	195.68	144.269	240.27	234	144.268	280.45	238.5	217.01	217.03	144.269	143.62	203.26	204.34	144.269	182.88	178.57	144.269	171.32	144.267	174.54	228.57	144.267	231.04	221.77	173.28
144.969	209.23	214.25	144.969	170.92	195.73	144.969	240.4	233.72	144.968	281.58	239.03	214.17	217.28	144.969	143.59	203.26	204.43	144.969	184.12	178.17	144.969	171.64	144.967	174.02	230.45	144.967	231.17	221.85	172.93
145.669	209.43	212.17	145.669	172.12	196.86	145.669	240.43	234.17	145.668	280.42	239.65	208.39	217.09	145.667	143.77	203.27	204.35	145.669	184.56	177.83	145.669	171.36	145.667	174.4	232.25	145.667	231.27	221.95	173.56
146.369	209.89	212.24	146.368	172.61	197.18	146.367	240.35	234.23	146.364	270.68	239.48	205.56	215.85	146.367	143.82	203.54	204.29	146.369	184.44	177.99	146.369	172.01	146.369	173.1	232.91	146.363	231.34	221.8	173.48
147.067	210.09	212.29	147.069	174.18	197.71	147.069	240.79	233.96	147.068	261.84	239.75	212.76	214.32	147.067	143.68	203.52	204.18	147.069	184.29	177.96	147.069	172.23	147.067	180.47	233.24	147.067	231.54	221.89	173.37
147.767	210.32	211.63	147.77	171.37	197.75	147.769	240.81	234.04	147.768	269.03	239.98	214.26	213.54	147.769	141.98	203.09	204.49	147.769	183.92	177.97	147.769	172.06	147.769	182.16	233.29	147.769	231.07	221.98	173.35
148.469	210.23	211.81	148.468	169.8	197.44	148.469	240.78	230.1	148.468	275.35	240.02	216.11	214.43	148.469	148.28	203.25	204.64	148.469	183.81	178.05	148.469	172	148.469	182.35	233	148.467	231.45	221.98	173.34
149.167	210.46	212.06	149.167	170.04	197.52	149.169	240.38	229.72	149.168	277.57	239.84	216.63	215.61	149.169	149.72	203.22	204.66	149.169	183.63	178.24	149.169	171.33	149.169	181.7	233.12	149.169	231.39	222.09	173.36
149.869	210.33	211.71	149.87	169.63	197.72	149.869	240.13	229.02	149.868	276.78	240.06	216.51	216.01	149.867	146.08	203.67	204.81	149.865	183.99	178.43	149.869	170.72	149.863	182.43	233.32	149.869	231.28	222.12	173.14
150.567	210.83	211.35	150.57	169.1	197.82	150.571	240.54	229.61	150.569	278.38	240.02	216.57	216.01	150.569	143.49	203.19	204.63	150.569	184.1	178.16	150.569	173.26	150.567	179.77	233.23	150.569	231.23	221.73	173.17
151.269	210.56	211.09	151.268	169.28	197.9	151.269	240.87	230.57	151.269	277.38	240.12	215.47	215.96	151.269	143.78	202.82	204.7	151.269	182.73	178.81	151.269	195.06	151.267	178.29	233.48	151.269	231.45	221.93	173.22
151.969	210.55	211.96	151.968	169.27	197.71	151.969	240.95	231.38	151.967	276.34	240.23	212.79	215.82	151.967	143.64	197.02	205.29	151.969	177.36	178.11	151.969	194.16	151.967	177.28	232.91	151.967	231.35	222.04	173.12
152.669	213.24	211.65	152.668	168.61	197.93	152.669	240.75	231.79	152.669	276.58	239.98	209.05	215.58	152.667	143.21	193.33	201.52	152.669	178.61	178.46	152.669	186.04	152.669	176.34	233.1	152.669	231.12	222.2	172.74
153.367	225.18	211.57	153.37	169.01	197.98	153.369	240.77	231.67	153.367	277.93	240.68	216.16	215.84	153.369	143.27	195.34	199.67	153.365	179.66	177.99	153.369	178.86	153.369	175.72	232.95	153.369	230.9	221.89	173.22
154.069	224.8	211.36	154.068	168.93	198.37	154.069	240.62	232.11	154.069	281.12	240.36	217.28	215.6	154.067	143.67	195.4	201.55	154.069	181.75	178.25	154.069	173.73	154.069	175.5	232.98	154.069	230.6	222.2	173.02
154.769	218.7	211.84	154.77	168.78	197.84	154.769	240.58	232.31	154.767	280.57	240.74	217.86	215.9	154.769	144.48	196.16	203.81	154.769	182.65	178.1	154.769	173.35	154.767	175.58	232.47	154.767	231.23	222.52	173.05
155.467	213.35	211.37	155.47	168.39	198.36	155.469	240.67	232.83	155.467	275.86	240.06	218.24	215.88	155.467	144.25	198.22	203.75	155.469	183.89	177.64	155.469	171.91	155.469	175.31	232.43	155.469	231.67	225.6	173.12
156.169	210.37	211.62	156.168	168.8	198.5	156.169	240.78	232.77	156.169	278.42	245.59	218.24	216.38	156.169	144.79	200.6	203.83	156.169	184.44	178.29	156.169	171.3	156.167	175.7	233.07	156.169	229.36	227.44	173.05
156.869	209.66	211.47	156.868	168.48	198.72	156.869	240.76	232.94	156.863	279.02	246.71	216.59	216.45	156.867	144.11	201.38	203.83	156.865	184.36	178.48	156.869	171.51	156.867	175.66	232.39	156.869	218.6	224.72	173.05
157.569	209.96	211.46	157.568	168.49	198.73	157.565	240.54	232.93	157.567	279.92	246.28	215.89	215.78	157.567	144.24	200.91	204.03	157.569	184.52	178.31	157.569	172.3	157.567	175.19	231.95	157.569	216.01	220.79	173.21
158.269	209.89	211.83	158.268	168.53	198.66	158.269	240.77	233.05	158.267	281.08	246.5	213.43	216.05	158.267	143.88	201.6	204.07	158.269	184.48	178.22	158.271	172.48	158.267	174.6	232.06	158.269	217.41	218.75	173
158.969	210	211.98	158.97	168.25	198.49	158.969	240.52	232.81	158.967	280.02	243.42	218.76	215.96	158.967	143.82	201.61	203.89	158.969	184.54	178.15	158.969	172.49	158.969	174.9	232.2	158.969	223.65	219.4	173.2
159.669	210.65	212.18	159.668	168.59	198.4	159.669	240.23	232.86	159.667	280.84	241.94	218.05	216.44	159.669	143.58	201.34	203.89	159.669	184.41	178.02	159.669	172.21	159.669	174.47	232.6	159.669	228.64	219.93	173.23
160.371	209.97	212.15	160.37	168.45	198.33	160.369	240.51	233.21	160.369	280.66	240.5	218.15	215.83	160.367	143.44	201.4	204.02	160.369	184.55	177.92	160.367	172.2	160.363	174.99	232.69	160.369	229.94	220.46	173.23
161.067	210.48	211.6	161.07	168.62	198.44	161.069	240.28	232.94	161.069	281.7	240.3	217.22	216.09	161.067	143.52	202.09	204.22	161.069	184.17	178.35	161.067	172.16	161.067	175.18	232.1	161.069	230.69	220.25	173.22
161.769	210.62	211.45	161.77	168.93	198.26	161.769	240.43	233.2	161.768	281.35	240.04	216.96	216.09	161.767	143.68	201.82	204.19	161.769	184.27	178.06	161.767	172.56	161.767	175.42	232.36	161.769	230.85	220.56	173.09
162.469	210.32	211.9	162.47	168.71	198.33	162.469	239.89	233.11	162.467	280.58	240.16	216.56	215.99	162.467	143.41	202.93	204.15	162.469	184.2	178.71	162.469	172.3	162.467	175.08	232.08	162.469	231.72	220.72	173.43
163.169	210.09	212.07	163.17	168.63	198.34	163.169	239.6	233.59	163.167	281.23	240.6	217.31	215.86	163.167	143.21	202.97	204.01	163.169	184.48	178.53	163.167	172.85	163.167	175.16	232.5	163.169	231.95	220.53	173.06
163.871	209.99	211.19	163.87	168.59	198.59	163.869	239.55	233.06	163.868	281.56	240.4	216.46	215.71	163.867	143.3	202.36	204.47	163.863	184.05	178.8	163.869	172.84	163.863	175.31	232.44	163.869	231.79	221.22	173.47
164.569	210.3	211.07	164.57	170.34	198.34	164.571	240.05	233.42	164.567	281.51	240.6	215.93	216.08	164.567	143.36	202.58	204.26	164.567	183.86	178.73	164.567	172.55	164.567	174.84	232.23	164.569	231.4	221.12	173.69
165.269	209.8	213.41	165.27	171.31	198.52	165.269	239.94	233.29	165.264	281.28	240.5	216.31	216.08	165.267	143.36	202.67	204.64	165.269	183.86	178.53	165.269	172.14	165.269	175.19	232.03	165.269	232.03	221.04	173.32
165.969	210.43	219.92	165.97	172.16	198.45	165.967	240.76	233.33	165.968	280.64	240.77	217.06	216.48	165.967	143.3	203.28	204.55	165.969	184.3	177.99	165.969	172.41	165.967	175.29	232.4	165.967	232.45	221.38	173.75
166.669	210.61	218.25	166.67	170.14	198.44	166.667	240.23	233.35	166.67	280.63	240.66	216.49	216.29	166.667	142.65	202.9	204.99	166.671	184.25	186.17	166.669	172.81	166.667	174.83	232.02	166.667	232.22	221.41	173.5
167.368	210.65	214.54	167.37	171.78	198.58	167.367	239.57	233.32	167.368	278.96	240.84	217.99	216.68	167.367	142.78	202.75	204.74	167.369	183.92	190.08	167.367	172.94	167.363	175.07	231.71	167.367	232.23	221.5	173.61
168.067	222.77	212.77	168.07	170.4	198.65	168.067	239.98	233.56	168.068	280.54	241.09	218.02	215.77	168.067	143.03	203.16	204.85	168.071	184.3	185.48	168.069	173.15	168.068	174.83	232.57	168.067	232.44	221.56	173.74
168.767	225.13	214.1	168.768	170.67	198.63	168.767	239.89	233.68	168.768	282.58	241.13	217.07	215.68	168.767	142.93	203.36	204.87	168.769	184.27	180.98	168.769	172.8	168.768	175.22	232.29	168.767	232.45	221.83	173.51
169.469	223.29	213.62	169.468	170.35	198.53	169.469	239.81	233.68	169.468	282.97	241.4	216.78	216	169.467	143.29	203.01	204.98	169.469	184.44	178.26	169.469	173.1	169.468	174.88	232.32	169.467	232.34	221.82	173.73
170.169	214.5	212.49	170.168	170.1	198.6	170.167	240.21	233.47	170.168	281.72	241.16	216.29	216.19	170.17	145.31	203.26	204.8	170.169	184.36	178.11	170.169	173.43	170.168	174.94	232.7	170.167	232.64	221.88	173.56
170.868	211.1	211.79	170.868	169.64	198.48	170.869	240.73	233.86	170.868	281.34	242.31	216.59	215.87	170.869	149.09	196.53	205.2	170.865	184.56	178.43	170.869	173.1	170.864	174.96	232.65	170.867	232.57	221.78	173.8
171.57	209.89	211.77	171.568	169.57	198.77	171.569	240.44	233.92	171.568	279.11	246.49	216.38	216.03	171.568	149.03	194.09	201.64	171.569	184.21	177.74	171.567	172.64	171.568	174.33	232.53	171.567	232.64	221.82	173.5
172.27	209.93	211.18	172.268	169.31	198.69	172.269	240.17	233.89	172.268	279.32	249.63	216.01	216.08	172.269	146	196.11	199.63	172.269	183.99	178.39	172.269	172.82	172.268	174.95	232.64	172.267	232.62	221.94	173.49
172.968	209.98	211.14	172.968	169.34	198.65	172.969	240.93	233.68	172.968	279.72	250.61	216.57	216.25	172.97	144.38	195.86	201.24	172.969	184.24	178.64	172.969	172.3	172.968	175	232.7	172.967	232.78	221.88	173.41
173.669	209.85	210.8	173.668	169.24	198.72	173.669	240.06	233.67	173.668	281.63	245.69	216.57	216.24	173.67	144.27	197.5	203.03	173.669	184.29	178.61	173.669	172.8	173.668	174.99	232.22	173.668	225.89	220.73	173.35
174.37	210	210.94	174.368	169.43	198.9	174.367	240.46	233.71	174.368	280.5	243.25	216.6	216.51	174.368	144.03	200.2	203.25	174.369	184.51	178.37	174.37	172.59	174.364	175.12	232.4	174.367	217.82	224.68	173.49
175.07	210.67	210.97	175.068	169.41	198.61	175.069	240.03	233.41	175.07	282.39	242.38	217.61	216.71	175.07	143.75	201.45	203.46	175.069	184.09	177.96	175.069	172.12	175.068	174.87	232.35	175.068	216.89	224.33	173.33
175.77	209.94	210.59	175.768	169.07	198.61	175.767	240.23	233.63	175.768	279.59	241.75	208.21	216.83	175.768	143.97	201.63	203.53	175.77	184.34	178.05	175.77	182.68	175.768	174.9	232.75	175.768	222.03	220.77	173.58
176.468	210.29	210.88	176.468	169.19	198.67	176.47	240.66	233.83	176.468	275.72	241.63	206.88	216.77	176.468	144.26	202.67	203.72	176.47	184.61	178.3	176.47	196.96	176.468	175.18	232.01	176.47	228.18	219.27	173.65
177.168	210.13	211.51	177.168	169.15	198.33	177.168	240.05	233.43	177.168	276.86	240.85	212.96	216.67	177.168	144.57	202.61	203.92	177.17	184.57	177.88	177.17	192.88	177.168	175.03	232.42	177.169	229.85	219.63	173.63
177.868	209.63	211.05	177.868	169.17	198.57	177.867	240.62	233.51	177.868	277.12	241.02	215.17	215.34	177.868	145.5	202.02	204.13	177.866	184.95	178.65	177.87	183.2	177.864	175.35	232.24	177.869	230.96	220.11	173.54
178.568	209.67	211.92	178.568	168.72	198.38	178.568	240.54	232.89	178.568	279.39	240.84	217.54	215.35	178.569	144.94	202.34	204.09	178.57	184.9	178.29	178.57	176.7	178.568	174.99	232.34	178.569	232.24	219.97	173.66
179.268	209.6	210.95	179.27	168.75	198.66	179.27	240.78	233.29	179.268	281.45	241.11	218.14	216.03	179.269	144.8	202.87	204.32	179.27	184.83	178.69	179.27	173.97	179.268	175.24	232.16	179.269	233.08	220.43	173.71
179.968	209.88	211.71	179.97	168.74	198.45	179.97	240.56	233.56	179.968	281.1	241.45	217.48	216.64	179.969	143.97	202.48	204.09	179.97	184.51	178.12	179.97	172.68	179.967	174.92	232.83	179.969	233.01	220.55	173.62
180.67	210.19	211.48	180.668	168.81	198.53	180.67	240.31	233.49	180.67	281.7	241.24	217.95	216.37	180.669	144.05	202.63	204.51	180.67	184.17	178.18	180.672	172.4	180.669	175.38	232.87	180.669	233.44	220.99	173.76
181.368	210.32	210.72	181.368	168.75	198.36	181.37	240.42	233.19	181.368	281.96	240.93	218	216.25	181.369	143.32	202.94	204.83	181.37	184.85	178.41	181.37	171.51	181.363	175.22	233.13	181.365	233.31	221.3	173.92
182.07	211.69	211.11	182.07	169.14	198.46	182.07	240.91	233.47	182.068	281.87	241.59	217.07	216.46	182.069	144	202.57	204.76	182.07	181.21	178.26	182.068	171.79	182.067	174.88	232.67	182.069	233.8	221.1	173.88
182.77	223.75	211.04	182.77	169.09	197.36	182.77	240.93	233.25	182.77	277.65	241.04	216.94	215.59	182.769	143.96	202.76	205.3	182.77	176.4	178.03	182.77	171.85	182.767	175.33	232.8	182.769	233.84	221.25	173.71
183.47	225.46	210.84	183.47	168.9	197.96	183.47	241.24	233.84	183.468	275.71	241.32	216.43	216.3	183.467	144.39	202.88	204.81	183.47	176.59	178.15	183.468	172.62	183.467	174.62	232.75	183.469	233.99	221.56	173.83
184.17	219.97	210.82	184.168	169.23	198.34	184.17	240.6	233.53	184.17	280.16	242.31	217.53	216.8	184.167	144.73	202.15	204.67	184.17	176.17	178.02	184.168	172.89	184.167	175.05	229.94	184.169	233.7	221.58	173.87
184.868	214.36	211.24	184.868	169.22	198.16	184.87	240.52	233.96	184.87	279.45	241.58	217.01	216.38	184.869	143.71	203.07	204.83	184.864	176.24	178.48	184.868	172.32	184.864	175.26	228.96	184.867	233.73	221.93	173.97
185.564	210.88	210.98	185.57	168.89	198.01	185.568	240.29	232.79	185.568	280.72	242.02	217.33	216.52	185.569	143.52	202.89	205.11	185.57	179.66	178.16	185.568	173.2	185.567	174.88	228.16	185.569	233.82	222.13	173.94
186.268	209.45	211.59	186.27	168.89	198.18	186.268	239.98	233.42	186.268	281.17	241.89	216.59	216.58	186.267	144.29	203.77	205.18	186.27	181.99	178.31	186.268	191.62	186.267	174.93	230.32	186.267	233.94	221.87	173.98
186.968	209.8	211.52	186.97	169	198.22	186.968	236.64	233.49	186.968	280.47	241.85	216.12	216.49	186.969	144.53	192.98	202.8	186.968	184.35	178.24	186.97	193.11	186.97	174.65	233.64	186.969	234.15	222.24	173.85
187.668	209.93	211.11	187.67	168.83	198.14	187.67	237.98	233.48	187.668	281.4	241.92	216.28	216.31	187.669	144.05	195.72	199.84	187.67	184.66	178.18	187.67	185.41	187.667	175	234.23	187.667	234.02	222.27	173.84
188.368	210.5	211.31	188.37	168.51	198.41	188.368	237.23	233.35	188.368	282.02	242.56	216.22	216.47	188.367	143.81	197.59	200.76	188.364	184.54	178.09	188.37	178.23	188.364	174.28	234.06	188.365	233.66	222.59	174.03
189.068	209.56	211.2	189.068	168.42	198.69	189.068	238.33	233.41	189.068	282.79	241.94	216.61	216.94	189.069	149.15	199.9	203.4	189.068	184.91	178.5	189.068	175	189.068	174.53	234.56	189.069	233.86	222.64	174.02
189.77	210.43	211.43	189.768	168.84	198.45	189.768	239.55	233.36	189.768	281.6	241.73	216.83	216.55	189.767	149.47	201.73	203.42	189.768	184.96	177.59	189.768	173.63	189.768	174.44	234.19	189.769	234.04	222.5	174.01
190.468	210	211.7	190.468	170.02	198.44	190.47	240.45	233.42	190.468	276.92	241.62	217.69	216.58	190.469	146.47	201.73	203.79	190.47	185.13	178.3	190.47	172.14	190.468	174.6	234.43	190.469	233.63	222.91	174.01
191.17	210.8	210.96	191.168	170.91	198.29	191.17	240.23	233.38	191.168	276.65	241.73	211.72	216.71	191.167	144.56	202.54	203.85	191.17	185.04	178.26	191.17	172.23	191.169	174.31	234.51	191.169	234.35	222.56	174.16
191.868	210.25	210.82	191.87	171.25	198.43	191.87	240.42	233.7	191.868	277.92	241.69	206.02	216.91	191.867	144.37	203.01	204.08	191.864	185.28	178.45	191.868	172.37	191.865	174.05	234.26	191.869	234.29	222.79	173.95
192.568	210	210.79	192.568	171.78	198.56	192.568	240.27	233.53	192.568	278.81	241.26	206.35	217.09	192.567	144.71	202.06	204.7	192.568	184.8	178.26	192.568	172.1	192.569	174.42	234.23	192.569	233.35	222.88	174.16
193.268	209.49	211.17	193.268	172.95	198.51	193.268	240.19	232.94	193.268	278.79	241.81	215.35	216.46	193.269	144.43	202.47	204.43	193.27	184.54	182.63	193.27	171.96	193.267	174.8	234.32	193.269	229.08	223.19	174.22
193.968	209.53	210.78	193.968	171.38	198.32	193.968	240.19	233.08	193.968	279.62	241.82	216.39	216.8	193.969	144.46	203.43	204.69	193.97	184.67	189.07	193.97	171.51	193.967	174.43	233.77	193.969	218.38	223.39	174.12
194.67	209.85	211.26	194.67	170.19	198.36	194.668	239.95	233.2	194.668	280.23	241.61	217.48	216.41	194.669	145.5	203.7	204.49	194.668	184.5	186.75	194.67	170.87	194.669	174.34	233.85	194.669	217.19	226.03	174.1
195.368	209.76	211.53	195.364	170.37	198.43	195.368	240.45	233.15	195.368	280.2	241.93	216.62	216.3	195.369	145.21	203.44	204.89	195.366	184.68	182.91	195.368	170.99	195.363	174.24	233.97	195.369	218.21	227.05	174.01
196.068	209.74	212.42	196.068	169.84	198.41	196.07	240.08	233.39	196.068	279.01	241.17	216.47	216.76	196.067	144.84	203.27	205.01	196.068	184.59	178.44	196.068	170.54	196.069	174.47	234.02	196.069	223.68	223.52	174.19
196.768	210.05	212.46	196.768	169.3	198.56	196.77	240.04	233.54	196.77	277.84	246.09	215.94	217.02	196.767	144.97	204.07	205.04	196.77	184.94	177.48	196.77	171.18	196.769	174.35	233.83	196.769	228.37	221.79	174.22
197.468	210.26	218.8	197.468	169.38	198.6	197.47	239.98	233.6	197.468	277.07	250.61	215.62	217.77	197.467	145.28	203.91	205.41	197.47	184.72	178.21	197.47	171.62	197.469	174.59	233.42	197.469	230.11	221.59	174.25
198.17	210.18	218.88	198.168	169.5	198.42	198.168	240.23	233.52	198.168	277.67	249.57	215.25	217.58	198.167	144.91	203.44	205.5	198.17	180.73	177.77	198.17	172.28	198.169	174.37	233.77	198.169	231.24	222.1	174.41
198.868	209.91	218.28	198.87	169.45	198.23	198.868	240.32	233.62	198.868	278.44	244.97	215.4	217.09	198.867	144.59	203.35	205.59	198.866	177.25	177.61	198.868	172.11	198.865	175	233.19	198.869	231.99	221.79	171.84
199.57	210.18	216.61	199.57	169.73	198.29	199.568	240.03	233.53	199.568	279.13	242.33	216.17	216.7	199.567	144.75	203.84	205.73	199.568	177.55	178.55	199.57	171.49	199.569	174.7	230.34	199.569	232.6	221.84	170.61
200.268	210.76	213.01	200.27	169.22	198.45	200.27	240.49	233.35	200.268	278.62	241.29	215.87	216.62	200.269	144.77	203.72	205.73	200.268	176.08	178.8	200.268	172.48	200.269	174.26	229.38	200.269	232.75	222.12	171.99
200.968	210.59	213.09	200.969	169.61	198.4	200.97	240.23	233.61	200.968	279.47	241.15	216.35	216.56	200.967	144.59	203.36	204.88	200.97	178.71	178.57	200.97	172.42	200.965	174.32	231.24	200.968	233.19	222.36	174.22
201.67	210.18	212.07	201.668	168.93	198.31	201.668	240.11	233.45	201.668	278.8	241.08	212.28	216.79	201.667	145.01	202.41	202.75	201.67	182.5	178.39	201.668	172.07	201.667	174.21	233.26	201.668	233.41	222.11	175.17
202.368	211	211.83	202.368	169.3	198.09	202.37	240.41	233.55	202.368	277.37	241.46	210.57	216.43	202.367	144.56	195.09	201.24	202.366	183.51	178.1	202.368	172.18	202.363	174.63	234.25	202.37	233.25	222.29	174.86
203.07	211.12	211.48	203.069	169.23	198.13	203.07	240.29	233.2	203.068	277.57	241.06	213.43	216.44	203.067	144.99	197.1	201.78	203.068	184.55	177.97	203.068	172.5	203.069	174.72	234.52	203.068	233.86	222.35	175.18
203.77	211.02	211.22	203.768	169.45	198.24	203.77	240.4	233.62	203.77	278.75	241.2	215.83	217.22	203.767	144.82	198.51	203.88	203.77	184.82	178.34	203.77	172.42	203.769	174.17	234.99	203.768	234.08	222.77	174.98
204.468	220.32	211.23	204.471	168.96	198.31	204.47	240.36	233.23	204.47	277.52	240.37	217.02	216.75	204.469	144.65	198.32	203.53	204.47	185.18	177.62	204.47	172.1	204.467	174.22	235.13	204.468	234.46	222.76	175.16
205.17	224.79	210.64	205.171	168.75	198.53	205.17	240.53	233.5	205.17	276.57	240.67	216.89	216.37	205.167	144.41	200.66	204	205.17	184.88	178.24	205.168	172.51	205.169	174.06	234.74	205.168	233.77	222.75	175
205.868	220.56	210.43	205.869	168.71	198.48	205.87	240.71	233.29	205.87	277.62	240.71	218.05	216.22	205.867	144.72	201.75	204.66	205.864	185.2	178.38	205.868	172.63	205.863	174.91	235.08	205.87	233.39	222.88	175.26
206.568	218.25	210.14	206.569	168.74	197.89	206.57	240.23	233.37	206.568	277.48	240.62	217.47	216.23	206.567	144.32	202.21	204.98	206.568	184.97	178.24	206.568	171.73	206.567	174.31	234.88	206.568	233.58	223.07	175.06
207.268	215.18	209.43	207.269	168.45	198.14	207.268	240.61	233.35	207.268	277.05	240.81	217.2	217.05	207.267	144.91	201.82	204.53	207.268	185.13	177.91	207.268	171.98	207.267	174.37	235.14	207.268	233.44	223.25	171.84
207.968	212.98	209.96	207.969	168.65	198.11	207.968	240.16	233.18	207.968	278.13	241.14	215.95	216.57	207.965	143.12	201.48	204.77	207.968	183.37	178.42	207.968	172.21	207.967	174.05	234.39	207.968	233.64	223.44	170.82
208.668	210.72	209.54	208.669	168.54	198.58	208.668	240.31	233.52	208.668	279.26	240.31	216.26	217.07	208.667	148.98	202.3	204.74	208.67	177.75	178.15	208.668	172.27	208.667	173.91	234.81	208.668	234.28	223.7	172.9
209.368	211.03	209.49	209.369	168.64	199.03	209.368	239.91	233.57	209.368	278.38	241.48	215.98	216.82	209.367	149.7	202.73	204.99	209.368	178.33	178.14	209.368	172.66	209.363	174	234.46	209.364	234	223.78	174.6
210.068	211.21	209.57	210.069	170.99	199.08	210.068	240.36	233.45	210.068	279.14	241.12	216.94	216.89	210.067	147.41	203.1	204.89	210.068	180.24	178.72	210.068	172.96	210.069	174.1	234.69	210.068	234.08	223.59	175.78
210.768	211.3	209.51	210.769	171.32	198.61	210.768	240.54	233.62	210.768	280.01	241.09	216.97	217.23	210.769	145.37	203.03	204.83	210.769	182.72	178.78	210.77	172.77	210.769	174.27	234.79	210.77	234.48	223.75	175.6
211.468	210.86	209.18	211.469	172.44	198.55	211.468	240.63	233.65	211.468	283.24	241.06	217.97	217.25	211.467	144.66	202.41	204.58	211.469	184.05	178.51	211.468	173.03	211.469	173.94	234.6	211.468	234.2	223.56	175.44
212.17	211.09	208.98	212.169	171.41	198.39	212.168	240.52	233.69	212.168	283.99	241.43	217.9	216.67	212.167	144.41	202.52	205.04	212.169	184.87	178.73	212.168	173.02	212.169	174.47	234.51	212.168	233.67	223.67	175.7
212.868	211.06	216.26	212.869	172.16	198.48	212.868	240.54	233.55	212.868	282.31	241.15	211.65	216.56	212.867	144.09	202.68	205.09	212.865	184.94	178.64	212.868	172.61	212.863	174.29	234.33	212.868	233.77	223.66	175.45
213.568	210.42	219.55	213.569	171.41	198.66	213.568	239.97	233.76	213.568	284.87	241.11	208.51	216.73	213.567	144.25	202.55	205.11	213.569	184.66	178.4	213.566	172.86	213.567	174.33	234.41	213.568	233.84	223.93	175.59
214.268	209.37	215.65	214.269	171.46	198.34	214.268	240.13	233.64	214.268	284.69	242.34	214.46	216.42	214.269	144.49	202.91	205.54	214.269	185.07	179.01	214.266	173.16	214.267	174.22	234.23	214.268	233.95	223.89	176.31
214.97	209.45	214.07	214.969	169.94	196.37	214.968	240.21	233.79	214.968	283.1	241.8	216.57	216.98	214.969	145.09	202.86	205.34	214.969	185.16	178.57	214.968	172.92	214.967	174.16	234.32	214.968	233.68	223.81	175.95
215.668	210.07	212.59	215.669	169.66	194.91	215.668	240.25	232	215.668	282.1	241.48	217.74	216.65	215.667	145.46	202.21	205.38	215.669	185.15	178.29	215.67	173.09	215.669	174.11	234.26	215.668	233.98	223.7	175.79
216.368	210.23	212.64	216.369	169.46	192.81	216.368	240.41	225.84	216.368	282.11	241.3	218.02	216.09	216.367	144.94	202.44	205.42	216.363	184.87	177.94	216.37	172.51	216.363	174.12	234.58	216.364	234.67	224.1	175.9
217.068	210.1	211.93	217.069	169.45	194.09	217.068	240.36	224.78	217.068	280.75	241.41	217.4	216.46	217.067	144.26	202.94	205.44	217.069	180.91	178.03	217.064	172.6	217.069	174.26	234.41	217.068	234.49	224.16	176.25
217.768	210.4	211.44	217.769	169.43	194.32	217.768	240.15	224.66	217.77	280.74	241.52	216.69	216.33	217.767	144.3	203.42	205.31	217.769	178.12	178.65	217.77	172.13	217.769	174.05	234.43	217.768	235.36	224.2	172.13
218.468	209.79	211.04	218.469	169.3	194.75	218.468	240.14	226.34	218.468	279.58	241.72	216.72	215.57	218.467	144.06	203.87	205.23	218.469	178.66	178.45	218.47	171.73	218.469	174	234.34	218.468	236.35	224.16	170.42
219.168	210.8	210.48	219.169	169.24	195.25	219.168	240.35	228.36	219.168	279.14	241.27	217.37	216.02	219.169	144.13	203.87	205.37	219.169	180.65	178.58	219.17	171.76	219.169	174.14	234.77	219.168	235.95	224.44	169.78
219.868	210.86	209.71	219.869	169.3	195.36	219.868	240.23	229.6	219.869	276.63	241.16	217.17	216.83	219.867	144.49	204.24	205.71	219.87	183.32	179.23	219.87	171.37	219.863	173.8	234.35	219.868	235.99	224.16	170.92
220.564	210.71	209.73	220.569	169.21	196.21	220.568	240.27	229.41	220.569	278.74	241.44	217.51	216.86	220.567	144.85	203.85	205.88	220.569	183.85	179	220.57	171.94	220.569	174.64	234.05	220.568	235.71	224.45	173.95
221.268	210.59	209.04	221.269	168.94	196.41	221.268	240.62	230.09	221.271	279.06	241.55	216.38	215.99	221.267	144.83	203.83	205.52	221.27	184.68	179.06	221.266	172.26	221.267	173.97	233.68	221.268	235.3	224.59	175.29
221.968	210.79	208.95	221.969	168.7	196.59	221.968	240.38	230.08	221.969	279.02	241.71	216.25	215.94	221.969	144.48	204.47	205.28	221.97	185.13	178.46	221.968	172.19	221.969	174.44	230.44	221.968	235.18	224.55	175.94
222.668	210.73	208.22	222.669	168.65	196.77	222.67	240.37	230.47	222.669	278.66	241.37	215.97	216.32	222.667	143.59	195.42	202.17	222.672	184.5	179.11	222.67	172.49	222.669	174.73	230.52	222.668	235.01	224.25	176.34
223.368	210.95	208.28	223.371	168.73	197.15	223.368	240.6	230.6	223.369	279.36	240.56	215.74	216.01	223.367	147.66	194.46	199.67	223.37	185.03	178.96	223.37	172.61	223.363	174.22	230.36	223.371	235.22	224.45	176.78
224.068	210.51	208.51	224.069	168.82	197.64	224.068	240.35	230.72	224.071	279.2	244.32	216.87	216.36	224.067	151.85	197.39	200.53	224.07	184.6	179.17	224.068	172.62	224.067	173.85	233.78	224.068	234.8	224.23	176.48
224.768	210.55	208.55	224.769	169.07	197.5	224.768	239.52	231.07	224.769	279.32	248.38	217	216.82	224.767	149.46	198.28	203.55	224.77	184.96	179.43	224.768	173.01	224.767	173.98	235.45	224.77	234.26	224.5	176.55
225.468	210.69	208.95	225.469	168.74	196.89	225.47	238.13	231.56	225.469	278.76	249.8	216.7	216.7	225.469	145.47	198.02	203.7	225.472	185.05	179.3	225.47	172.67	225.467	174.11	235.57	225.471	234.38	224.9	176.4
226.171	210.37	209.26	226.171	168.64	197.11	226.168	239.05	231.52	226.169	277.53	245.2	216.32	216.12	226.167	144.11	200.26	203.54	226.17	184.32	179.31	226.168	172.12	226.167	174.17	235.63	226.168	234.51	224.95	176.59
226.868	210.25	208.29	226.871	168.63	197.27	226.868	235.98	231.96	226.869	276.3	241.43	216.53	215.67	226.867	145.32	202.57	204.08	226.87	184.66	179.13	226.87	172.52	226.863	174.24	235.92	226.869	234.18	225.13	176.46
227.569	211.52	209.19	227.571	168.95	197.32	227.568	235.42	231.84	227.569	276.71	240.19	216.05	216.1	227.567	144.54	202.05	204.53	227.568	184.47	179.18	227.568	172.76	227.567	174.66	236.06	227.569	234.74	225.28	176.72
228.269	211.65	208.8	228.269	168.92	197.56	228.268	236.24	231.92	228.267	279.3	239.91	216.41	216.09	228.27	144.79	203.2	204.16	228.27	184.15	179	228.266	172.3	228.267	179.26	235.68	228.268	234.58	225.02	176.57
228.968	224.22	209.69	228.969	169	197.49	228.968	238.25	232.03	228.969	279.68	240.43	217.17	215.99	228.967	144.93	202.65	204.76	228.97	184.61	179.01	228.968	172.52	228.967	183.18	235.91	228.969	234.83	224.9	176.81
229.669	224.87	209.6	229.669	169.07	197.4	229.668	239.07	230.81	229.667	279.96	240.3	217.79	216.06	229.669	144.4	202.98	204.62	229.67	184.44	179.38	229.67	173.42	229.667	184.21	235.92	229.669	235.02	224.87	176.66
230.369	220.11	209.75	230.363	169.33	197.85	230.368	239.43	231.14	230.369	279.36	240.26	217.61	216.23	230.364	144.49	203.22	204.8	230.364	184.55	178.94	230.368	172.51	230.363	181.7	236.12	230.369	234.82	225.14	176.26
231.069	213.85	208.77	231.069	170.44	197.98	231.068	239.6	229.99	231.067	279.14	240	216.47	216.29	231.068	145.13	203.28	204.87	231.07	184.39	178.86	231.068	172.49	231.067	178.83	236.11	231.069	234.86	225.02	174.52
231.769	210.42	208.73	231.769	171.6	197.92	231.764	240.04	230.63	231.769	278.43	239.91	216.74	216.38	231.768	145.33	203.97	205.14	231.77	184.59	179.11	231.769	172.64	231.767	177.07	236	231.769	234.6	225.35	170.79
232.469	208.99	209.32	232.469	171.25	197.9	232.468	240.03	231.26	232.469	276.5	239.94	215.48	216.37	232.47	145.24	203.66	205.09	232.47	184.64	179.37	232.47	172.83	232.467	176.97	235.31	232.469	234.65	225.09	169.31
233.169	209.71	208.72	233.169	173.35	197.75	233.168	240.09	230.62	233.169	274.42	240.33	215.87	216.15	233.168	144.89	203.72	204.79	233.168	183.48	178.87	233.168	172.7	233.169	175.91	235.5	233.169	234.17	225.37	169.68
233.869	209.92	209.55	233.869	171.53	197.73	233.869	240.22	231.39	233.869	272.88	240.01	216.21	216.41	233.864	145	203.39	204.79	233.868	176.59	179.11	233.868	173.19	233.867	176.5	235.79	233.865	234.71	225.55	172.07
234.569	209.87	209.35	234.569	170.8	197.83	234.568	240.21	230.93	234.569	275.64	240.3	217.24	216.31	234.568	145.26	203.3	204.92	234.57	176.64	178.85	234.57	172.77	234.567	176.57	235.51	234.569	235.05	225.28	174.46
235.269	209.94	209.41	235.269	170.14	197.79	235.269	240.07	231.45	235.269	275.77	240.73	216.76	216.85	235.268	143	203.3	205.68	235.27	176.49	179.36	235.27	172.96	235.267	176.44	235.55	235.269	234.84	225.76	176.07
235.969	209.92	209.21	235.968	169.38	197.6	235.965	240.29	231.57	235.967	278.6	240.37	216.73	216.9	235.968	147.03	203.32	205.93	235.97	175.61	179.26	235.97	172.24	235.963	176.38	235.66	235.969	235.15	225.93	177.46
236.669	209.88	208.97	236.668	169.33	197.96	236.669	240.02	231.99	236.669	277.58	240.55	216.99	216.6	236.668	149.54	203.62	205.81	236.67	176.75	179.8	236.67	171.37	236.667	176.1	235.63	236.669	235.02	225.46	177.21
237.369	209.46	209.06	237.368	169.4	198.05	237.369	240.06	231.94	237.369	277.54	240.39	217.53	216.41	237.364	146.93	203.29	205.89	237.366	179.86	179.97	237.37	179.62	237.363	175.87	235.06	237.369	234.97	225.31	177.6
238.069	209.4	208.88	238.068	169.75	198.15	238.069	240	231.86	238.069	276.7	240.59	217.56	216.33	238.068	144.97	203.05	205.53	238.068	182.48	179.34	238.07	197.53	238.067	175.84	235.21	238.069	235.08	225.35	177.64
238.769	209.56	209.25	238.77	169.51	198.37	238.769	240	231.94	238.769	276.59	240.38	217.48	216.3	238.768	144.97	203.67	205.73	238.77	184.23	189.95	238.77	197.25	238.767	175.57	235.17	238.769	234.62	225.45	177.57
239.469	209.44	208.9	239.47	169.58	198.26	239.465	240.27	232.55	239.469	279.13	240.9	216.87	216.59	239.468	144.88	203.38	206.12	239.47	183.8	189.46	239.47	189.31	239.467	176.31	235.46	239.469	235.12	225.54	177.35
240.169	209.17	209.3	240.17	169.62	198.36	240.169	240.01	232.44	240.169	281.82	240.44	216.46	215.37	240.168	145.28	203.95	206.08	240.17	184.6	186.05	240.17	182.08	240.169	176.18	235.11	240.169	234.67	225.25	177.35
240.869	209.7	211.26	240.87	169.31	198.38	240.869	239.93	232.22	240.869	281.53	240.5	216.17	215.66	240.868	145.33	203.55	206.02	240.867	184.64	180.35	240.87	177.61	240.864	176.02	235.34	240.871	234.94	225.59	177.49
241.569	210.43	213.5	241.57	169.26	198.11	241.571	239.91	232.31	241.569	282.95	240.39	216.03	216.28	241.568	145.21	200.95	201.05	241.569	185.22	177.63	241.57	173.95	241.568	175.72	234.83	241.569	235.06	225.86	177.4
242.269	209.83	210.23	242.27	169.35	198.22	242.269	239.53	232.33	242.269	280.57	240.06	216.28	215.81	242.268	145.73	194.67	199.88	242.271	185.48	178.29	242.27	172.84	242.268	176.04	230.23	242.269	234.74	225.63	177.65
242.969	209.98	209.77	242.968	169.61	198.17	242.965	239.74	231.37	242.969	278.99	239.5	216.67	215.73	242.964	145.59	196.39	202.02	242.969	183.87	178.38	242.97	174.13	242.966	175.83	229.82	242.969	234.78	225.85	177.42
243.669	210.31	209.63	243.67	169.23	198.29	243.671	239.76	225.64	243.669	278.78	245.49	216.82	215.92	243.668	145.38	199.22	203.77	243.671	179.24	178.6	243.67	174.21	243.666	175.81	229.96	243.669	235.18	225.82	177.39
244.369	210.42	210.3	244.37	169.91	198.15	244.369	240.49	222.38	244.369	279.36	248.26	216.52	216.04	244.364	145.12	200.42	203.74	244.366	180.2	179.24	244.368	172.96	244.362	175.63	233.08	244.369	235.56	225.84	177.5
245.069	210.14	210.18	245.068	169.33	198.27	245.071	238.37	223.9	245.069	278.77	249.05	217.69	215.91	245.068	145.52	201.36	204.53	245.07	182.28	178.95	245.068	172.8	245.068	175.62	234.81	245.069	235.04	225.71	177.23
245.769	209.85	210.2	245.77	169.75	198.32	245.769	235.06	227.41	245.769	279.17	245.01	216.94	215.55	245.768	145.19	202.5	204.7	245.77	183.73	178.11	245.77	173.09	245.766	175.23	235.43	245.771	235.08	225.87	177.15
246.469	210.22	210.07	246.47	169.55	198.04	246.467	236.18	228.48	246.469	279.79	242.67	217.07	215.48	246.468	145.42	202.26	204.96	246.47	184.66	178.37	246.47	172.19	246.467	175.57	235.38	246.469	235.07	225.96	177.32
247.171	210.55	210.3	247.17	169.5	198.51	247.169	236.4	229.48	247.169	278.87	241.41	217.02	215.67	247.168	145.21	202.3	205.19	247.17	184.99	178.31	247.17	172.5	247.166	175.62	235.49	247.171	235.3	226.18	177.18
247.869	210.48	209.7	247.864	169.21	198.19	247.871	236.37	229.7	247.869	278.2	240.5	217.01	215.81	247.868	145.87	202.77	205.52	247.87	185.28	178.28	247.868	173.12	247.867	175.04	235.54	247.871	235.36	226.27	176.89
248.569	210.4	209.98	248.57	169.31	196.39	248.571	238.25	230.14	248.569	278.62	240.76	216.44	215.91	248.568	145.42	203.58	205.74	248.568	185	178.57	248.568	173	248.567	174.53	235.76	248.565	221.76	227.26	176.73
249.267	222.11	209.52	249.268	169.33	193.79	249.269	238.73	230.36	249.267	278.15	240.52	216.97	217.14	249.268	143.92	203.37	205.9	249.27	184.79	178.48	249.268	172.82	249.268	174.6	235.77	249.269	217.76	230.46	176.88
249.97	224.61	209.52	249.97	169.42	194.92	249.965	238.85	230.7	249.967	277.62	240.61	217.56	216.99	249.968	148.72	203.17	205.72	249.97	184.66	178.91	249.97	172.99	249.969	174.82	236.15	249.969	217.89	229.72	176.95
250.67	222.05	209.83	250.67	169.17	194.85	250.669	239.25	230.61	250.667	278.11	241.06	217.12	216.09	250.668	150.66	203.11	205.6	250.67	184.33	178.46	250.668	172.74	250.669	174.35	236.06	250.669	222.62	226.1	177.38
251.368	213.92	209.57	251.368	169.11	194.78	251.369	239.56	230.87	251.369	280.6	240.18	215.97	215.43	251.364	149.09	202.77	205.91	251.368	178.51	177.8	251.37	172.79	251.363	174.32	235.63	251.365	227.76	223.4	177.27
252.07	211.72	209.4	252.07	170	195.76	252.069	239.49	230.99	252.069	282.71	239.76	216.2	215.65	252.068	145.51	202.67	205.99	252.07	177.96	178.93	252.068	172.47	252.067	173.71	235.76	252.069	231.92	223.27	177.36
252.768	209.47	209.75	252.768	171.07	196.33	252.769	239.6	230.86	252.769	281.73	239.8	217.49	216.15	252.768	144.96	202.86	205.88	252.77	180.13	178.52	252.768	172.63	252.769	174.44	235.44	252.769	233.85	223.39	177.09
253.468	210.25	210.22	253.47	170.62	196.6	253.469	239.54	230.61	253.467	281.72	240.33	216.98	215.32	253.468	145.03	203.16	206.09	253.47	182.75	178.72	253.47	172.67	253.467	174.4	235.56	253.469	234.89	223.34	177.3
254.17	210.09	209.31	254.168	171.76	197.11	254.165	239.74	225.7	254.167	279.19	240.16	216.95	215.71	254.168	145.12	203.34	206.19	254.17	184.1	178.83	254.168	172.96	254.169	173.81	235.41	254.169	235.32	224.25	177.56
254.868	210.18	209.19	254.868	172.2	197.22	254.865	239.51	227.18	254.865	277.81	240.45	215.54	216.12	254.868	145.92	203.3	205.91	254.868	184.72	178.89	254.868	173.73	254.863	173.99	236.03	254.869	236.04	224.17	177.18
255.568	210.44	209.74	255.568	171.94	197.2	255.569	239.04	229.49	255.567	278.14	240.4	215.52	215.83	255.568	145.48	203.12	206.14	255.568	184.27	178.41	255.57	173.8	255.569	173.83	235.6	255.569	236.23	224.39	177.46
256.27	210.04	209.59	256.269	170.89	197.69	256.269	239.46	229.92	256.269	278.31	240.39	215.56	215.79	256.268	145.92	203.15	206.43	256.268	184.06	178.54	256.27	173.16	256.269	173.75	235.54	256.269	236.34	224.45	177.25
256.968	210.1	209.58	256.968	170.71	197.92	256.969	239.35	229.9	256.967	278.54	240.19	215.73	216.08	256.968	145.69	203.78	206.58	256.97	184.75	178.71	256.97	172.95	256.967	174.06	230.51	256.969	236.42	224.52	176.23
257.67	210.47	210.42	257.671	169.53	197.65	257.669	239.26	230.26	257.669	277.77	240.39	214.8	216.47	257.668	145.07	203.32	205.9	257.67	184.52	178.57	257.669	173.78	257.667	174.24	230.3	257.669	236.97	224.76	172.6
258.368	210.65	209.55	258.369	169.67	197.84	258.369	239.44	229.98	258.365	273.32	240.98	215.94	216.41	258.368	145.37	202.97	206.04	258.364	183.84	178.81	258.369	173.89	258.365	173.67	233.85	258.369	237.28	224.66	171.2
259.068	221.53	209.76	259.068	169.74	197.94	259.069	239.25	230.23	259.069	275.53	240.31	216.54	216.76	259.067	144.92	203.08	206.23	259.07	177.36	178.54	259.069	173.72	259.069	173.77	235.07	259.065	237.08	224.74	170.73
259.768	221.88	209.5	259.769	169.76	197.83	259.769	239.61	230.02	259.769	277	244.23	214.81	216.27	259.767	144.72	195.29	205.48	259.77	177.71	178.7	259.771	173.28	259.767	174.47	234.68	259.769	237.46	224.86	171.79
260.469	217.54	209.88	260.469	169.48	197.68	260.469	239.32	230.02	260.469	278.97	248.09	203.53	216.46	260.467	145.09	197.33	201.02	260.468	181.04	178.61	260.469	187.68	260.469	174.2	235.44	260.469	237.51	225.08	173.07
261.169	212.45	210.12	261.169	169.19	197.85	261.169	239.23	230.41	261.167	277.05	250.82	202.34	216.06	261.169	144.84	198.71	200.92	261.168	183.58	178.9	261.171	197.12	261.169	174.43	235.74	261.169	237.19	225.16	175.79
261.869	210.97	210.05	261.869	169.43	197.87	261.869	238.81	230.63	261.869	280.7	248.05	207.8	215.41	261.869	145.07	198.45	203.86	261.866	184.82	178.56	261.869	192.7	261.869	174.37	236.24	261.869	237.52	225.08	177.9
262.569	210.12	210.17	262.571	169.59	197.77	262.569	239.19	230.15	262.569	276.7	243.35	212.39	215.71	262.567	145.06	199.33	204.25	262.57	185.14	179.13	262.569	183.19	262.569	173.99	236.48	262.565	237.52	225.42	178.05
263.269	210.29	209.46	263.269	169.43	197.76	263.269	238.97	229.64	263.269	274.84	242.08	214.43	214.82	263.267	145.33	200.31	204.69	263.27	184.63	178.74	263.269	178.78	263.269	174.73	236.57	263.269	237.81	225.46	178.13
263.969	210.62	213.87	263.969	169.14	197.9	263.969	239.15	230.41	263.969	278.78	240.88	216.64	215.11	263.967	145.55	201.49	205.42	263.97	184.97	179.05	263.969	175.08	263.968	174.85	236.82	263.969	237.71	225.24	178.52
264.669	210.61	219.11	264.669	168.59	198.14	264.669	239.2	230.99	264.669	276.88	240.74	215.84	215.78	264.667	145.79	202.52	205.38	264.67	184.84	178.93	264.669	174.77	264.668	174.25	236.8	264.669	237.9	225.49	178.39
265.369	210.26	217.27	265.369	168.98	198.24	265.369	239.95	231.07	265.369	276.11	241.6	214.88	215.79	265.369	145.66	202.34	205.29	265.366	185.29	179.04	265.367	173.99	265.364	174.18	236.48	265.365	237.9	225.42	178.6
266.069	210.64	214.88	266.069	168.94	198.1	266.069	239.83	231.11	266.069	277	241.91	214.8	215.51	266.067	145.4	202.29	205.44	266.068	184.57	178.56	266.067	173.8	266.068	174.17	236.79	266.069	237.91	225.54	178.22
266.769	210.56	213.65	266.769	168.88	198.07	266.769	238.71	231.03	266.765	276.41	241.31	215.2	215.7	266.769	145.42	202.8	205.23	266.77	179.34	178.69	266.769	173.23	266.768	174.01	237.01	266.765	238.16	225.72	178.34
267.469	209.76	213.36	267.471	168.87	198.32	267.469	239.01	230.97	267.469	279.09	240.97	214.54	215.71	267.467	144.93	202.84	205.42	267.47	177.61	188.22	267.469	173.26	267.464	174.24	236.99	267.469	237.7	225.68	178.25
268.169	209.77	212.52	268.171	168.96	197.94	268.169	239.09	231.42	268.169	277.48	240.89	214.46	216	268.167	144.84	202.91	205.61	268.17	178.97	188.64	268.167	172.67	268.168	174.96	236.36	268.171	237.51	225.44	178.3
268.867	209.34	211.85	268.869	168.41	197.78	268.869	238.71	231.6	268.863	277.33	240.9	214.62	215.53	268.867	144.91	203.48	205.49	268.864	182.37	184.53	268.869	172.35	268.862	174.29	236.65	268.865	237.8	225.75	178.11
269.569	209.53	211.55	269.569	170.63	197.98	269.571	235.49	231.55	269.567	277.5	241.14	213.96	215.62	269.569	144.99	203.37	205.55	269.568	184.51	179.43	269.569	172.89	269.568	174.42	236.48	269.569	238.41	226.08	177.96
270.269	209.43	211.76	270.269	170.92	197.84	270.269	236.3	231.8	270.267	276.11	240.64	213.94	216	270.269	144.68	203.14	205.66	270.268	184.99	177.73	270.269	172.97	270.268	173.91	236.4	270.267	238.09	226.07	178.14
270.969	209.48	211.81	270.971	171.74	198.15	270.969	237.21	231.75	270.967	275.19	241.11	213.55	216.02	270.967	144.49	203.56	205.5	270.968	184.92	178.12	270.969	173.38	270.964	174.59	236.67	270.967	237.59	226.24	178.42
271.669	209.98	211.33	271.669	172.64	198.2	271.667	237.67	231.77	271.669	276.21	241.33	213.65	215.55	271.667	144.12	203.67	205.68	271.668	184.74	178.28	271.669	173.66	271.668	174.09	236.57	271.669	237.6	225.96	178.25
272.367	210.04	211	272.369	173.79	198.1	272.369	238.69	231.81	272.367	273.4	241.67	214.37	215.86	272.367	144.7	203.43	205.77	272.364	185.12	178.11	272.369	173.12	272.364	173.97	236.48	272.369	237.39	226.34	178.2
273.069	217.31	210.36	273.069	171.07	198.38	273.067	239.37	231.79	273.068	272.39	241.06	214.2	215.58	273.067	144.55	196.7	205.42	273.068	185.1	178.75	273.069	173.2	273.067	174.44	236.67	273.067	237.24	226.73	178.09
273.769	225.14	210.43	273.769	169.91	198.51	273.769	238.85	231.79	273.767	274.26	241.08	214.38	215.14	273.767	144.12	197.58	201.82	273.77	185.14	178.23	273.769	172.92	273.767	174.45	236.49	273.767	237.79	226.62	178.35
274.467	225.74	210.38	274.469	169.55	198.42	274.467	239.33	231.55	274.467	275.36	241.04	213.93	215.49	274.467	143.97	199.19	200.96	274.469	185.34	178.34	274.469	173.46	274.469	174.51	236.41	274.469	237.29	226.86	178.39
275.169	216.91	209.72	275.169	169	198.28	275.169	239.38	231.68	275.168	275.33	241.36	214.29	216.05	275.169	145.48	200.01	202.95	275.17	185.03	178.07	275.169	173.34	275.169	174.5	236.63	275.168	237.71	226.66	178.51
275.867	220.24	209.15	275.869	168.88	198.25	275.867	239.44	231.82	275.867	269.56	241.54	214.35	215.89	275.869	150.63	202.16	203.88	275.863	184.89	177.79	275.869	173.17	275.863	174.04	234.93	275.87	237.3	226.85	178.29
276.567	217.86	209.12	276.569	168.46	198.17	276.567	239.4	227.41	276.567	266.87	241.06	213.74	216.23	276.567	150.68	202.76	203.56	276.569	179.6	177.99	276.569	173.24	276.567	174.27	231.45	276.568	238.1	226.84	178.29
277.267	213.7	209.79	277.269	168.94	198.02	277.269	239.51	220.07	277.268	268	240.52	214.25	215.74	277.267	146.94	203.6	203.78	277.27	177.02	178.15	277.269	173.71	277.267	174.16	231.14	277.268	237.78	226.82	178.11
277.967	211.46	209.4	277.971	168.54	198.49	277.967	239.36	219.24	277.968	271.38	240.14	214.6	215.97	277.969	145.85	202.87	204.51	277.969	178.33	178.14	277.969	173.86	277.967	174.43	232.04	277.968	237.96	227.18	178.5
278.669	209.3	208.69	278.669	168.35	198.08	278.669	239.62	222.91	278.67	273.68	241.1	213.93	216.34	278.669	145.57	203.05	204.65	278.67	182.73	178.28	278.669	173.65	278.667	174.47	235.29	278.669	237.92	227.47	174.55
279.367	209.29	209.24	279.369	168.38	198.32	279.367	239.1	225.94	279.368	277.23	245.26	213.72	215.57	279.369	145.51	203.06	204.5	279.366	184.24	178.77	279.369	174.79	279.363	174.59	236.62	279.368	237.56	227.55	172.48
280.069	209.65	208.72	280.069	168.72	198.4	280.069	238.98	228.31	280.068	275.61	249.67	213.62	215.4	280.068	145.27	203.56	204.85	280.07	184.77	178.23	280.069	193.03	280.069	174.31	236.52	280.068	238.03	227.47	171.76
280.769	209.9	208.92	280.769	168.75	198.27	280.767	239.22	228.28	280.768	274.57	250.78	213.45	215.56	280.768	145.23	203.95	204.56	280.77	185.58	178.75	280.769	196.88	280.767	174.35	236.91	280.771	238.41	227.71	174.56
281.469	209.65	208.87	281.469	169.01	198.34	281.469	239.04	229.22	281.468	275.17	247.36	212.33	216.03	281.466	145.3	204.01	205.19	281.469	185.44	178	281.469	189.43	281.469	174.58	236.93	281.469	237.68	227.93	177.47
282.169	209.45	208.71	282.169	169.23	198.09	282.169	239.02	229.43	282.17	275.85	243.18	213.42	215.98	282.166	145.3	203.9	205.19	282.171	185.47	178.24	282.169	183.31	282.169	174.74	236.98	282.169	237.9	228.12	178.42
282.87	209.68	208.79	282.865	169	198.33	282.869	238.9	229.75	282.868	275.29	241.89	213.46	215.59	282.868	145.84	204.56	205.24	282.865	185.19	177.93	282.869	177.7	282.865	175.03	237.2	282.869	237.73	227.95	178.83
283.567	209.71	213.97	283.569	168.91	198.49	283.569	238.84	230.13	283.568	274.77	241.78	213.08	215.89	283.566	145.86	203.99	205.57	283.569	185.32	178.49	283.569	174.97	283.567	174.5	236.82	283.568	237.34	227.94	178.96
284.27	209.65	220.18	284.269	168.49	198.58	284.269	239.19	230.65	284.268	274.27	242.29	214.22	215.96	284.268	146.16	204.21	205.69	284.271	185.65	178.42	284.269	174.5	284.269	174.76	236.85	284.269	237.47	228.07	178.77
284.968	209.86	217.21	284.969	168.45	198.43	284.969	239.09	230.47	284.968	275.56	242.23	214.38	216.39	284.969	146.19	203.75	205.6	284.969	185.18	178.21	284.97	173.86	284.969	174.21	237.14	284.969	237.91	228.2	179
285.667	210.07	213.4	285.669	168.67	196.66	285.669	239.04	230.79	285.67	276.35	241.71	213.47	216.51	285.669	146.08	203.81	205.79	285.671	184.92	178.21	285.669	173.37	285.667	174.34	236.9	285.671	238.15	228	178.93
286.37	209.86	211.19	286.369	168.84	195.58	286.369	238.92	230.29	286.364	274.37	241.65	213.34	216.35	286.367	146.06	204.36	206.09	286.369	179.04	178.46	286.37	172.89	286.363	174.57	237.05	286.367	237.97	227.91	179.09
287.064	209.95	212.01	287.069	168.32	194.53	287.069	238.77	230.69	287.068	274.89	241.64	213.59	216.06	287.067	145.86	204.34	206.19	287.069	179.37	178.21	287.068	172.36	287.067	174.78	236.62	287.069	238.17	228.09	179.11
287.77	209.98	212.92	287.769	168.44	195.15	287.769	239.09	230.53	287.77	275.19	241.47	213.35	216.03	287.768	145.89	204.56	205.94	287.771	180.35	177.96	287.769	172.99	287.769	174.73	236.77	287.771	237.93	228.6	178.9
288.47	209.95	211.75	288.469	168.2	195.45	288.47	238.98	230.9	288.47	274.41	241.43	215.21	215.59	288.469	145.95	204.76	206.02	288.471	183.51	177.97	288.47	173.32	288.467	174.61	236.5	288.471	237.86	228.11	178.84
289.17	209.99	211.82	289.171	168.35	195.47	289.17	238.73	229.37	289.17	276.79	241.67	214.67	216.38	289.169	145.78	204.68	206.32	289.171	184.32	177.72	289.168	173.15	289.169	174.76	236.58	289.169	238.14	228.01	178.89
289.87	217.01	210.78	289.869	168.6	195.86	289.87	239.18	226.54	289.864	276.43	241.27	215.62	215.17	289.867	146.36	204.31	206.46	289.865	184.49	177.97	289.868	172.88	289.863	174.57	237.06	289.871	237.95	228.15	179.21
290.568	224.33	210.64	290.569	168.26	196.53	290.57	239.29	227.85	290.568	276.32	241.45	216.01	214.83	290.567	145.49	204.53	206.41	290.569	184.53	178.68	290.568	172.78	290.567	174.31	236.21	290.569	237.77	228.5	179.13
291.27	222.64	210.01	291.269	168.25	196.52	291.27	239.17	228.94	291.268	276.18	241.62	216.73	215.15	291.267	145.44	204.52	205.93	291.269	184.77	178.78	291.268	173.2	291.269	174.52	230.79	291.269	238.09	228.66	179.32
291.968	214.88	209.22	291.969	168.38	196.91	291.969	239.3	229.09	291.968	275.81	242.35	216.93	215.4	291.969	145.72	205.29	206.19	291.97	184.95	178.35	291.968	173.51	291.967	175.9	230.79	291.969	238.11	228.44	179.27
292.668	211.9	209.64	292.669	171.09	196.63	292.669	239.27	229.6	292.668	271.42	244.83	216.65	215.59	292.669	146.28	205.14	206.46	292.67	185.13	178.64	292.668	173.22	292.667	175.86	233.16	292.669	238.48	228.37	179.21
293.368	209.62	209.7	293.369	172.47	196.75	293.369	239.33	229.31	293.368	270.05	248.76	215.55	216.24	293.369	145.42	205.25	206.42	293.364	184.95	178.73	293.37	173.63	293.363	174.82	235.27	293.369	237.95	228.67	179.29
294.068	209.55	209.61	294.069	172.73	197.33	294.069	240.06	230.32	294.068	268.61	250.11	214.84	216.62	294.069	145.41	205.06	206.68	294.07	185.26	178.8	294.07	173.62	294.067	174.57	236.21	294.069	238.29	228.47	179.22
294.768	209.66	208.69	294.769	172.18	197.64	294.769	240.28	230.19	294.768	272.84	247.7	214.14	216.01	294.769	145.36	204.48	205.69	294.772	184.84	178.79	294.77	173.9	294.767	174.17	236.52	294.769	238.54	228.64	179.28
295.468	210.32	208.82	295.469	173.37	197.57	295.469	239.11	230.33	295.468	273.39	244.16	214.06	216.22	295.469	145.15	197.2	201.98	295.47	178.52	178.81	295.47	173.47	295.467	174.64	236.65	295.469	238.4	228.91	179.41
296.17	209.82	209.13	296.169	173.36	197.41	296.169	239.48	230.75	296.17	273.39	242.12	214.81	216.03	296.169	145.34	195.54	201.68	296.17	178.58	178.86	296.17	174.6	296.167	175.07	237.31	296.169	238.5	229.04	179.46
296.868	209.97	209.14	296.869	172.47	197.29	296.869	239.61	230.32	296.864	274.74	242.09	214.62	216.52	296.869	145.19	198.27	203.11	296.866	179.04	179.11	296.87	196.53	296.863	175.18	237.45	296.869	238.51	228.95	179.27
297.564	210.2	209.26	297.571	171.26	197.53	297.569	239.61	230.57	297.568	272.72	241.78	215.65	216.16	297.567	144.89	198.54	204.62	297.568	181.72	178.85	297.57	195.99	297.567	174.75	237.89	297.569	238.14	225.18	179.41
298.268	210.36	216.64	298.269	170.73	197.46	298.271	239.28	230.88	298.268	275.59	241.68	215.3	216.66	298.269	144.5	199.79	204.65	298.268	184.1	179.21	298.27	187.53	298.267	175.32	237.87	298.269	234.16	225.05	176.41
298.969	209.99	217.6	298.969	169.72	197.65	298.969	235.87	230.66	298.968	275.83	242.06	215.15	216.03	298.969	144.57	201.81	205.58	298.968	184.39	179.18	298.97	181.5	298.967	175.1	237.6	298.969	234.19	225	175.93
299.669	209.68	214.15	299.669	169.77	197.59	299.671	237.37	230.68	299.67	276.07	241.63	214.69	215.9	299.669	144.48	202.47	205.92	299.67	185.26	179.19	299.67	176.89	299.669	174.71	237.76	299.669	234.21	225.31	176.33
