# Supplementary material for: The gut contractile organoid for studying the gut motility regulated by coordinating signals between interstitial cells of Cajal and smooth muscles
Source: eLife. 2025 Aug 22;13:RP97860. doi: 10.7554/eLife.97860 (PMC12373395; doi:10.7554/eLife.97860)
Supplement: Figure 3—figure supplement 1—source data 1. [file elife-97860-fig3-figsupp1-data1.xlsx]

## Sheet: Figure 3-supplement 1B
name	ratio	Positive cells	DAPI
Tuj1	0.43	1	232
Tuj1	1.13	4	352
Tuj1	1.04	3	288
Tuj1	0.84	2	237
Tuj1	0.9	3	332
Tuj1	0.82	2	245
Tuj1	1.21	2	165
Tuj1	0.94	1	106
Tuj1	0	0	94
Tuj1	1.96	2	102
Tuj1	0.76	1	132
Tuj1	1.27	1	79
aSMA	46	46	100
aSMA	20.8	21	105
aSMA	40	40	100
c-Kit	53	53	100
c-Kit	49.5	52	105
c-Kit	69	69	100

## Sheet: Figure 3-supplement 1C
Before											TTX
Time_1	#1 (TD)	#2 (TD)	#3 (TD)	#4 (TD)	#5 (TD)	Time_2	#1 (TD)	#2 (TD)	#3 (TD)	#4 (TD)	Time_1_ttx	#1 (TD)	#2 (TD)	#3 (TD)	#4 (TD)	#5 (TD)	Time_2-ttx	#1 (TD)	#2 (TD)	#3 (TD)	#4 (TD)
-0.001	187.16	172.02	160.77	149.93	157.49	0.065	201.6	225.4	308.3	193.71	-0.001	255.56	222.93	226.89	231.39	237.42	0.064	230.9	248.38	309.3	189.07
0.718	187.27	172.07	160.72	149.49	157.52	0.719	201.35	225.37	316.58	192.97	0.719	255.63	222.55	226.58	231.17	237.06	0.719	230.55	248	309.13	189.65
1.37	187.74	172.69	160.86	150.83	157.57	1.37	201.55	225	313.51	193.36	1.37	255.87	222.28	226.16	231.04	237.22	1.367	230.97	247.86	309.36	189.28
2.018	187.7	172.68	160.76	162.72	157.83	2.02	201.71	225.18	306.16	193.06	2.02	255.85	225	226.57	231.21	237.11	2.019	230.62	247.71	309.29	189.03
2.668	187.83	172.95	161.1	163.95	157.81	2.67	201.72	225.3	300.7	193.29	2.668	255.77	227.98	226.94	231.17	236.66	2.663	230.8	247.72	309.4	188.73
3.318	187.94	172.92	161.43	159.02	157.84	3.321	201.65	225.47	298.36	193.13	3.32	255.43	224.19	226.32	231.07	236.58	3.315	230.77	248.14	309.25	188.84
3.968	187.99	173.02	161.63	153.93	158.04	3.971	201.6	225.6	296.76	193.45	3.968	255.6	221.97	226.99	230.37	236.55	3.968	230.64	247.79	309.33	189.41
4.618	188.35	173.21	161.75	151.85	158.45	4.619	201.54	225.43	295.92	200.13	4.62	255.25	220.22	226.83	230.96	236.18	4.616	230.83	247.72	309.21	189.36
5.269	188.61	173.54	161.97	151.61	158.35	5.269	201.88	225.87	294.89	202.62	5.269	255.91	220.5	227.41	230.9	236.25	5.268	230.68	247.93	309.2	189.38
5.919	188.55	173.61	162.08	151.08	158.23	5.919	201.87	225.25	294.5	200.73	5.919	255.77	220.48	226.87	230.53	235.8	5.914	230.52	247.97	309.06	188.51
6.569	188.81	173.5	162.31	150.96	158.51	6.571	201.73	225.22	294.03	197.18	6.565	255.69	220.64	226.93	230.56	236.26	6.568	230.56	248.12	308.92	189.14
7.219	188.81	174.17	162.46	151.03	158.85	7.218	201.8	225.53	293.85	195.25	7.219	255.68	220.63	227.38	230.43	235.99	7.214	230.42	247.7	308.76	189.01
7.869	189.25	174.01	162.38	151.03	159.18	7.87	201.93	225.54	293.33	194.81	7.865	255.67	220.43	227.3	231.1	235.92	7.864	230.76	247.42	308.93	188.66
8.519	189.3	174.18	162.73	151.01	158.72	8.519	201.53	225.48	293.42	194.45	8.515	255.46	221	226.54	230.92	235.97	8.518	230.35	248.05	309.15	188.61
9.169	189.53	174.35	162.9	151.71	159.07	9.169	201.83	225.42	293.07	194.41	9.169	255.69	220.87	227.08	230.34	235.95	9.168	230.81	247.62	309.24	188.9
9.819	189.57	174.57	163.01	151.69	159.4	9.82	201.34	225.29	293.19	194.01	9.815	255.78	220.92	226.66	230.58	235.66	9.817	230.62	248.02	308.9	195.85
10.469	190.03	174.83	163.31	151.7	159.5	10.471	202.32	225.3	292.87	193.74	10.465	255.68	220.92	226.79	230.44	235.77	10.464	230.86	247.67	309.03	199.67
11.119	190.18	174.96	163.35	151.89	159.65	11.119	209.57	225.41	293	193.69	11.119	255.85	221.29	226.82	230.63	235.31	11.115	230.75	247.56	308.95	198.18
11.769	190.19	175.19	163.78	151.85	159.97	11.771	210.68	225.46	292.88	193.51	11.765	256.18	220.93	227.39	230.62	235.85	11.768	230.51	248.13	309.08	194
12.418	190.24	175.04	168.9	152.14	159.94	12.42	206.7	225.63	292.88	193.62	12.414	255.82	220.87	227.08	230.22	235.49	12.415	230.56	247.77	309.32	191.45
13.068	190.6	175.52	171.57	152.65	159.88	13.07	202.54	225.82	292.75	193.12	13.066	256.01	221.21	226.94	229.85	235.23	13.064	230.39	248.07	309.14	191.01
13.717	190.78	175.63	168.88	152.69	160.03	13.719	201.68	225.78	292.61	193	13.714	260.51	221.55	227.52	229.96	235.98	13.715	230.85	247.89	308.76	190.83
14.369	190.99	175.07	164.65	152.31	160.6	14.369	201.33	225.41	292.65	193.33	14.365	259.36	221.34	227.06	230.05	235.58	14.37	230.69	248	309.17	189.82
15.018	191.24	175.82	163.28	152.74	160.58	15.02	200.92	225.67	292.24	193.04	15.019	256.05	220.9	227.24	230.16	235.38	15.015	230.83	248.46	309.49	190.42
15.67	191.4	176.23	162.75	153.06	160.92	15.67	200.9	225.48	292.32	193.25	15.665	255.28	221.22	232.26	230.08	235.58	15.664	230.89	248	309.21	190.37
16.318	191.7	176.22	163.32	153.06	161.07	16.32	201.06	225.49	292.49	193.39	16.319	254.2	221.52	236.65	232.28	235.32	16.316	230.69	248.2	309.3	189.89
16.969	191.75	176.76	163.53	153.4	161.21	16.97	200.63	225.61	292.24	192.77	16.965	253.33	221.36	234.32	248.96	235.89	16.965	230.7	248.25	309.58	189.8
17.619	191.86	176.9	163.71	153.38	161.18	17.619	200.87	225.45	292.4	192.93	17.619	252.92	221.51	230.42	253.18	235.76	17.615	231.22	247.97	309.34	189.82
18.27	192.02	176.67	163.51	153.51	161.25	18.269	200.83	225.52	292.12	192.99	18.265	253.11	221.81	227.69	247.55	236.06	18.269	231.28	248.07	309.69	189.6
18.917	192.43	176.74	164.31	153.29	161.37	18.919	200.5	225.35	291.81	192.95	18.919	252.6	221.27	226.48	239.01	235.79	18.915	230.89	248.02	308.89	189.76
19.57	192.51	177.31	164.81	153.77	161.67	19.57	200.69	225.21	291.96	193.01	19.564	252.85	221.81	225.61	233.79	235.6	19.565	231.22	248.25	309.1	189.76
20.218	192.85	177.14	164.24	154.13	161.9	20.22	200.62	225.36	292.05	192.98	20.216	252.79	221.33	225.51	231.94	235.44	20.215	230.87	247.88	309.52	189.24
20.869	193.14	177.56	164.82	153.91	162.04	20.87	200.56	225.47	292.19	195.45	20.864	252.54	221.76	225.72	231.47	235.36	20.865	230.93	247.78	309.2	189.26
21.518	192.93	177.53	165.14	154.42	162.06	21.52	200.8	225.28	292.31	200.01	21.52	253.32	222.14	225.67	231.48	235.45	21.52	230.67	248.15	309.28	189.08
22.17	193.3	177.46	165.68	154.12	162.31	22.17	200.91	225.26	291.71	200.99	22.164	253.06	222.19	225.4	230.97	235.55	22.17	230.79	248.03	309.01	189.21
22.82	193.5	178.06	165.82	154.76	162.45	22.82	200.84	225.31	291.98	197.95	22.814	253.64	221.58	225.6	231.03	235.6	22.82	230.78	248.31	309.19	189.19
23.47	193.65	178.32	166.09	154.59	162.64	23.466	200.95	225.28	292.28	195.83	23.469	253.13	224.05	226.04	230.5	235.8	23.464	231.14	248.02	309.47	189.1
24.12	193.83	178.08	166.18	154.87	162.95	24.119	201	225.41	291.93	195.17	24.115	253.53	226.64	225.81	230.55	236	24.117	231.03	248.32	309.23	189.42
24.77	194.05	178.43	166.65	157.22	162.86	24.769	201.26	225.4	291.88	194.38	24.765	253.83	224.41	225.96	231	235.44	24.768	231.2	247.64	309.12	189.07
25.419	194.4	178.42	166.71	169.15	163.3	25.418	201.04	225.25	291.74	193.94	25.419	253.57	222.77	225.73	230.79	235.72	25.416	230.94	247.96	309.2	189.02
26.069	194.87	179.14	166.94	169.41	163.22	26.068	200.99	225.75	292.23	193.92	26.064	254.25	220.99	226.06	230.97	235.59	26.066	230.77	247.27	308.74	188.69
26.72	195.01	179.3	167.4	164.15	163.58	26.719	200.9	225.81	291.99	193.4	26.715	254.06	220.97	225.99	230.77	235.46	26.718	230.76	247.61	308.7	188.63
27.369	195.19	179.62	167.53	159.46	163.28	27.369	200.62	225.76	292.05	193.52	27.365	253.74	220.84	225.61	230.62	236.06	27.365	230.5	247.81	308.81	188.58
28.02	195.38	179.5	167.81	157.49	163.92	28.019	201.13	225.54	292.08	193.48	28.02	254.58	221.05	226.17	230.36	235.94	28.021	230.9	247.77	308.71	188.3
28.67	195.62	180.11	167.69	156.97	164.06	28.669	201.04	225.49	291.89	193.46	28.665	254.69	220.67	225.92	234.01	235.68	28.67	230.9	247.81	309.34	188.81
29.32	195.87	180.01	168.13	156.56	163.99	29.319	200.94	225.51	292.24	193.54	29.315	254.36	220.42	226.29	249.54	235.71	29.314	230.89	248	308.89	188.62
29.97	195.93	180.56	168.13	156.71	164.4	29.969	201.05	225.71	291.97	193.31	29.967	254.96	220.61	226.28	251.31	235.62	29.97	237.18	247.84	308.75	189.03
30.62	196.45	180.58	168.47	156.51	164.54	30.619	201.01	225.49	291.9	193.56	30.615	254.77	220.93	226.51	245.13	235.44	30.614	237.33	248.4	308.78	188.4
31.27	196.72	180.91	170.22	156.8	165.05	31.269	201.12	225.64	291.81	193.24	31.266	254.65	220.85	226.45	237.28	235.6	31.27	232.82	247.92	308.82	188.66
31.92	196.55	180.74	176	156.97	164.85	31.919	201.07	225.43	291.83	193.22	31.914	254.96	220.8	226.44	233.64	235.34	31.914	231.11	248.08	309.01	188.27
32.57	196.93	181.4	176.46	156.95	165.1	32.569	201.11	225.5	291.58	192.96	32.565	254.9	220.76	226.67	232.68	235.64	32.57	230.27	248.13	309.16	188.78
33.219	197.05	181.18	172.98	157.85	165.65	33.219	201.24	225.74	291.56	196.64	33.215	254.85	220.89	226.66	232.1	235.45	33.214	229.94	247.9	309.08	188.63
33.869	197.54	181.85	169.54	157.88	165.8	33.869	201.16	225.24	291.84	200.85	33.866	254.78	221.13	226.92	231.37	235.58	33.865	229.75	247.63	309.2	187.89
34.518	197.7	182.12	168.51	158.11	165.72	34.519	201.3	225.25	292.13	200.43	34.516	254.82	221.01	226.84	231.15	235.41	34.515	229.76	247.91	309.11	188.65
35.17	198.32	182.32	168.07	158.17	165.97	35.169	201.39	225.18	291.92	198.1	35.17	254.86	220.51	226.76	231.3	235.49	35.169	229.66	247.98	308.97	188.51
35.818	198.5	182.69	168.97	157.97	166.38	35.819	201.01	225.47	291.75	195.63	35.815	254.82	221.37	226.71	231.63	235.28	35.815	229.34	247.58	308.86	188.56
36.47	198.55	182.55	168.73	158.31	166.27	36.465	200.99	225.6	291.62	194.74	36.465	255.43	220.78	226.47	231.76	235.22	36.465	229.15	247.59	309.04	188.45
37.118	199.17	182.92	169.54	158.45	166.37	37.119	201.05	225.59	292.09	194.17	37.115	255.54	220.96	226.74	231.53	235.58	37.119	229.14	247.87	309.3	188.85
37.77	199.5	183.52	169.42	158.4	166.63	37.769	201.39	225.56	291.76	194.18	37.771	255.13	220.87	226.73	231.69	235.34	37.769	229.4	247.56	308.87	188.47
38.418	199.46	183.59	170.02	159.03	167.13	38.419	201.32	225.61	291.45	193.89	38.415	255.24	221.27	226.72	231.6	235.16	38.419	229.34	247.37	308.82	188.8
39.07	199.67	183.19	170.32	159.06	167.2	39.069	201.24	225.37	291.61	193.8	39.065	255.07	220.82	227.14	231.48	235.14	39.068	229.69	247.85	308.89	197.33
39.718	199.9	184.3	170.95	160.75	167.23	39.719	201.35	225.16	291.42	193.76	39.715	255.31	222.04	227.51	231.8	235.1	39.716	229.68	247.82	309.27	199.55
40.37	200.54	184.43	170.97	172.9	167.42	40.368	206.56	225.31	291.64	193.31	40.366	255.32	226.58	227.16	231.08	235.37	40.364	229.47	247.69	308.94	197.19
41.019	200.49	184.17	171.04	174.1	168.03	41.019	210.96	225.38	291.81	193.59	41.02	255.55	225.47	227.22	231.16	234.94	41.018	229.34	248.22	308.89	192.63
41.669	200.52	184.8	171.28	169.31	168.12	41.669	207.78	225.53	291.27	193.26	41.664	255.41	222.26	227.36	230.99	235.09	41.664	230.03	247.91	309.26	191.36
42.319	201.03	184.84	171.94	164.08	168.34	42.319	203.95	225.17	291.45	193.08	42.316	255.77	221.65	227.4	231.18	235.6	42.32	230.06	247.8	309.12	190.8
42.969	201.57	185.51	172.07	162.32	168.24	42.969	201.74	225.14	291.69	192.9	42.964	255.92	220.58	227.74	231.01	235.03	42.968	229.93	247.84	309.24	190.9
43.618	201.84	185.61	172.33	161.6	168.82	43.619	200.91	225.13	291.47	193.11	43.616	255.78	220.5	227.64	231.47	235.61	43.614	230.07	247.85	308.81	190.42
44.268	201.98	185.82	173.22	161.25	168.43	44.269	200.79	224.96	291.8	192.77	44.27	255.82	220.23	227.68	231.46	235.32	44.264	230.05	247.81	309.04	190.37
44.918	202.41	186.1	173.21	161.42	169.04	44.919	200.21	225.03	291.47	192.6	44.916	255.74	220.29	227.67	231.49	235.85	44.916	229.77	247.33	308.77	189.81
45.569	202.47	186.24	173.36	161.75	169.57	45.569	200.32	225.06	291.79	192.89	45.566	256.29	219.99	227.66	231.52	235.56	45.568	229.7	247.56	308.84	189.46
46.219	203.02	187.01	173.74	162.02	169.74	46.218	200.31	225.3	291.72	192.87	46.216	256.39	220.4	227.88	231.33	235.37	46.215	229.83	247.2	308.76	189.49
46.868	202.92	186.93	173.66	162.34	169.77	46.87	200.18	225.54	291.7	193.18	46.866	255.68	219.77	227.54	231.03	235.23	46.868	230.01	247.86	308.98	189.19
47.519	203.62	186.75	174.29	162.34	170.29	47.518	200.46	225.24	291.66	193.21	47.516	255.75	220.36	227.84	230.75	235.54	47.518	229.83	247.91	308.84	189.09
48.169	204.07	187.08	174.89	162.78	170.45	48.17	200.73	225.19	291.66	192.96	48.166	255.92	220.18	227.05	230.95	235.19	48.164	229.82	247.77	309.07	189.39
48.819	203.84	187.61	174.73	163.5	170.75	48.818	200.47	225.64	291.53	193.03	48.816	256.04	220.35	227.32	230.98	235.45	48.819	229.8	247.49	308.75	189.28
49.469	204.37	188.15	175.12	163.56	170.64	49.468	200.27	225.18	291.78	193.27	49.466	256.06	220.13	227.31	230.8	235.08	49.469	229.65	247.57	308.7	188.57
50.119	204.42	187.96	175.43	163.83	171.4	50.118	200.65	225.42	291.57	192.65	50.114	256.13	219.94	227.37	230.97	235.16	50.115	229.69	247.68	309.08	188.8
50.769	204.69	188.08	175.94	163.88	171.32	50.77	200.47	225.37	291.69	192.58	50.766	255.95	220.32	227.67	230.62	235.24	50.768	229.91	247.57	308.84	189.11
51.419	205.24	190.91	175.8	164.35	171.87	51.419	200.34	225.7	291.63	193.02	51.414	256.24	221.31	227.52	230.97	234.92	51.414	230.06	257.36	309.14	188.87
52.069	205.01	190.9	176.41	164.27	171.83	52.069	200.56	225.32	291.78	192.8	52.065	255.99	220.28	227.76	230.95	234.73	52.068	229.99	268.36	308.77	188.84
52.719	205.05	189.32	176.18	164.35	172.45	52.719	200.58	225.18	291.67	192.55	52.715	255.87	221.03	227.47	230.57	234.91	52.715	229.69	266.75	308.64	188.32
53.369	205.74	188.26	176.63	164.77	172.29	53.369	200.86	225.29	291.73	192.5	53.365	256.12	220.31	227.66	230.74	235.17	53.369	229.85	258.65	308.85	188.65
54.018	205.87	188.37	180.93	164.74	172.55	54.019	200.17	224.95	291.55	192.29	54.016	256.07	220.76	227.93	230.24	234.77	54.019	230.11	251.88	308.97	189
54.668	206.22	189.02	185.66	164.84	172.89	54.665	200.61	225.77	291.86	192.68	54.666	256.06	220.62	227.68	230.53	234.54	54.664	229.91	250.12	308.64	188.39
55.318	206.56	189.64	184.76	165.31	173.3	55.319	200.5	225.26	291.93	192.7	55.32	256.23	221.28	227.8	230.52	234.72	55.314	229.98	249.27	309.01	188.67
55.968	206.61	189.75	179.43	165.6	173.06	55.971	200.56	225	291.7	192.23	55.97	256.19	221.33	227.62	230.83	235.1	55.969	230.21	248.81	308.86	188.72
56.62	206.87	189.96	176.48	165.37	173.45	56.619	200.28	225.19	291.54	192.25	56.616	256.51	220.94	227.56	230.31	235.03	56.615	230.39	248.35	309.27	188.72
57.268	206.96	190.1	176.33	165.75	173.86	57.269	200.36	224.97	291.49	192.25	57.266	256.54	222.88	228	230.33	234.95	57.269	230.25	248.28	309.03	188.33
57.918	207.08	189.53	176.77	166.19	173.92	57.919	200.46	225.13	291.75	192.42	57.92	256.57	226.7	227.24	230.43	234.89	57.915	230.59	247.98	309.2	188.37
58.568	207.45	189.95	176.69	166.13	174.45	58.57	200.79	225.13	291.57	192.11	58.57	256.27	223.02	227.55	230.58	235	58.567	230.39	247.92	308.85	188.51
59.218	207.43	189.72	176.65	166.7	174.39	59.216	200.48	225.11	291.75	192.23	59.219	257.01	222.31	227.97	230.54	234.95	59.219	230.18	247.58	309.15	188.46
59.868	207.71	189.96	177.24	166.66	174.97	59.87	200.65	225.07	291.74	192.28	59.866	256.54	220.43	227.33	230.54	234.89	59.869	230.25	247.91	309.1	188.41
60.518	207.73	189.51	177.91	167.36	174.79	60.52	200.38	225.36	291.57	192.16	60.52	256.45	220.61	227.57	230.53	234.97	60.518	230.16	247.71	309.21	188
61.169	208.21	189.55	178.12	167.16	175.06	61.17	200.66	225.13	291.42	192.01	61.17	256.37	220.66	227.77	231.15	234.69	61.163	230.17	247.73	309.04	188.28
61.819	208.49	189.94	178.27	167.88	175.61	61.821	200.39	228.91	291.68	192.6	61.82	259.17	220.13	227.61	246.89	234.78	61.819	230.39	247.36	309.18	187.88
62.469	208.73	189.89	178.2	167.79	175.73	62.469	200.5	237.73	291.46	192.41	62.466	260.41	220.16	227.9	252.24	234.89	62.467	230.26	247.21	309.26	188.59
63.119	208.7	189.69	178.78	167.99	175.88	63.119	200.5	238.28	291.58	192.24	63.116	258.21	220.35	227.95	248.45	234.74	63.115	230.18	247.62	309.22	188.13
63.768	209.01	190.29	179.03	168.18	176.15	63.769	200.53	233.03	291.44	192.24	63.77	255.13	219.79	227.95	239.45	234.71	63.769	230.33	247.74	308.82	188.19
64.419	208.82	190.46	179.18	168.41	176.5	64.42	200.35	227.38	291.69	192.5	64.416	255.2	220.33	227.48	234.44	234.65	64.415	230.68	247.15	308.83	188.36
65.069	209.55	190.24	179.45	168.87	176.86	65.07	200.33	225.09	291.34	192.57	65.064	254.17	220.08	227.52	231.57	234.67	65.064	235.78	247.08	308.8	187.79
65.719	209.72	190.46	180.16	169.04	177.16	65.72	200.72	224.01	291.58	192.6	65.72	253.31	220.5	227.68	231.17	234.6	65.72	235.13	246.97	309.16	188.12
66.367	209.98	190.63	179.9	169.29	177.4	66.369	200.26	224.06	291.39	192.03	66.364	252.67	220.77	227.63	230.7	234.67	66.368	231.27	246.87	308.67	188.27
67.019	210	190.48	180.6	169.76	177.64	67.019	200.7	224.3	291.64	192.39	67.014	252.72	220.99	227.9	230.75	234.47	67.017	229.71	246.88	309.07	188.2
67.669	210.35	191.09	180.74	170.1	178.11	67.669	202.6	224.05	291.38	192.54	67.67	252.62	220.63	227.66	230.89	234.45	67.664	229.07	246.77	309.02	188.75
68.319	210.44	190.86	181.06	170.06	178.03	68.319	209.6	224.1	291.66	192.37	68.316	252.7	220.5	227.54	230.35	234.7	68.313	228.79	246.96	308.76	188.16
68.969	210.82	191.39	181.33	170.15	178.4	68.966	209.65	223.91	291.4	192.18	68.965	252.67	220.78	227.34	230.31	234.72	68.964	228.8	247.11	309.02	188.15
69.619	211.04	191.36	181.17	170.08	178.7	69.62	204.68	224.25	291.73	196.81	69.615	252.66	220.7	227.54	230.65	234.29	69.618	228.59	246.91	308.69	188.38
70.269	211.14	191.78	181.57	170.6	178.96	70.27	201.95	224.44	291.73	201.71	70.265	253.43	220.92	227.69	230.65	234.63	70.269	228.72	247.09	308.86	188.33
70.92	211.18	191.4	181.74	170.77	179.07	70.92	200.52	224.34	291.46	200.08	70.915	253.26	221.17	227.47	230.24	234.79	70.913	228.68	247.13	308.96	188.09
71.569	211.31	191.54	181.81	171.08	179.53	71.57	200.97	224.32	291.86	197.84	71.565	253.52	221.24	227.35	230.53	234.44	71.566	228.74	246.71	308.91	188.28
72.219	211.7	191.32	182.09	171.35	179.38	72.219	202.64	224.25	291.55	195.46	72.218	253.5	220.92	227.09	230.04	234.08	72.216	228.7	246.93	308.83	188.06
72.869	211.94	192.01	182.38	171.45	179.98	72.87	202.92	224.55	291.63	194.32	72.866	253.29	222.07	227.04	230.2	234.65	72.866	228.83	247.3	308.49	187.93
73.519	211.88	191.78	182.74	171.79	180.31	73.52	200.68	224.15	291.53	193.59	73.518	253.59	226.19	227.55	230	234.45	73.519	228.64	246.96	308.96	188
74.169	212.01	192.45	182.99	172.23	180.79	74.17	200.07	224.19	291.37	193.84	74.166	253.91	224.84	227.77	230.15	234.82	74.169	229.09	246.94	308.62	187.96
74.82	212.48	192.09	182.95	172.07	180.7	74.82	200.12	224.42	291.4	193.54	74.814	254.43	222.49	227.54	229.95	234.48	74.815	228.61	247.04	308.7	188.02
75.469	212.71	192.4	183.35	172.51	181.28	75.47	200.29	224.5	291.7	193.36	75.47	257.42	221.01	227.55	229.82	234.41	75.469	228.74	247.18	308.49	188.06
76.12	212.78	191.99	183.65	172.58	181.47	76.12	199.99	224.91	291.43	193.37	76.114	256.65	220.27	227.57	230.23	234.47	76.119	228.81	246.91	308.61	188.54
76.77	212.78	192.54	183.46	172.49	181.38	76.77	199.72	224.6	291.51	192.97	76.77	255.17	220.07	227.49	230.75	234.86	76.77	229	247	308.98	188.21
77.419	213.17	192.57	184.1	172.97	181.71	77.42	199.69	224.51	291.33	193.02	77.414	255.28	219.71	227.47	229.76	234.64	77.418	229.32	256.42	308.93	188.05
78.069	213.05	192.55	183.81	173.06	182.07	78.069	199.86	224.7	291.38	192.8	78.07	253.84	220.22	227.84	230.06	234.67	78.07	228.99	268.21	308.8	188.47
78.719	213.3	192.25	183.64	173.16	181.76	78.719	199.8	224.49	291.22	193.09	78.715	253.07	220.2	227.71	230.01	234.6	78.72	229.01	265.92	308.81	188.18
79.369	213.39	192.7	184.11	173.38	181.77	79.37	200.01	224.85	291.66	192.75	79.365	252.49	220.19	227.44	230.27	234.44	79.368	229.08	256.7	308.72	195.33
80.02	213.69	193.44	184.2	173.57	182.58	80.02	199.78	225.06	291.43	192.85	80.015	251.94	220.1	228.01	230.4	234.46	80.02	229.14	251.56	308.64	199.38
80.669	213.84	192.53	184.19	173.83	182.36	80.669	200.01	224.72	291.81	192.67	80.669	251.92	220.4	227.71	230.11	234.53	80.666	229.15	249.46	308.76	198.12
81.32	214.08	193.2	184.18	173.82	182.93	81.318	199.97	224.74	291.42	192.6	81.319	252.18	220.65	227.85	230.19	234.11	81.32	228.81	248.8	308.37	194.06
81.969	214.05	193.08	184.4	174.25	183.05	81.969	199.8	224.46	291.6	192.7	81.969	251.84	220.72	227.72	230.41	234.42	81.97	228.55	248.51	308.66	191.04
82.62	214.46	193.11	184.72	174.5	183.19	82.618	199.62	224.84	291.65	192.73	82.614	252.05	220.42	227.84	230.53	234.42	82.616	229.23	247.98	308.4	190.24
83.27	214.63	193.78	184.61	174.51	183.28	83.269	199.78	224.77	291.3	192.31	83.264	252.6	220.37	227.76	230.56	234.2	83.268	229.13	247.83	308.11	189.78
83.92	214.16	197.25	184.85	174.36	183.51	83.919	199.77	224.41	291.16	192.32	83.914	252.51	220.43	227.55	230.19	234.28	83.916	229.48	247.52	308.28	190.16
84.569	214.31	196.69	184.83	174.75	183.79	84.57	200	224.7	291.37	192.51	84.564	252.73	220.42	228	230.27	234.39	84.565	231.45	247.6	308.77	189.63
85.219	214.35	194.09	185.04	174.71	183.85	85.22	199.62	224.6	291.21	192.6	85.216	252.59	220.14	227.52	229.72	234.57	85.216	235.17	247.44	308.72	189.72
85.869	214.71	193.26	186.45	175.14	184.02	85.87	199.83	224.78	291.22	192.13	85.864	253.11	220.66	227.68	232.62	234.56	85.87	233.23	247.24	308.67	189.17
86.519	214.8	193.68	192.37	185.79	184.23	86.52	199.78	225.05	291.31	192.34	86.516	252.89	220.9	227.79	249.2	234.13	86.516	230	247.34	308.73	189.22
87.169	214.61	194.29	193.48	192.95	184.4	87.17	199.63	224.91	291.57	192.23	87.17	253.32	222.16	227.56	252.23	234.29	87.165	229.01	247.29	308.78	188.99
87.82	214.63	194.38	189.98	190.18	184.69	87.82	199.67	225.33	291.41	192.91	87.82	253.43	225.95	227.82	246	234.57	87.815	228.23	247.02	308.37	189.08
88.468	214.86	193.99	185.25	183.63	184.92	88.47	200.15	225.09	291.49	198.48	88.466	253.98	223.31	227.88	237.5	234.09	88.47	228.61	247.25	308.58	189.1
89.119	214.8	193.78	183.59	179.24	184.66	89.12	200.24	224.93	291.45	200.69	89.116	253.41	222.81	227.63	233.2	234.16	89.114	228.22	247.07	308.58	188.87
89.769	214.85	193.82	183.44	177.61	184.92	89.77	200.16	224.91	291.4	198.46	89.766	254.03	222.5	228.08	231.13	234.32	89.77	228.15	247.22	308.38	188.52
90.419	214.94	193.87	183.66	177.16	185.14	90.42	199.81	225.03	291.31	195.73	90.42	253.5	222.78	227.72	230.65	234.31	90.414	228.07	247.31	308.45	188.75
91.069	214.83	193.46	183.42	176.65	185.53	91.07	199.78	224.88	291.37	194.32	91.07	253.85	222.25	227.23	230.29	234.43	91.066	228.12	247.29	308.69	188.62
91.719	214.89	193.44	183.95	176.23	185.49	91.714	199.86	225.26	291.14	193.52	91.715	253.91	221.55	227.57	230.96	234.34	91.714	228.46	260.58	308.83	188.71
92.369	215.23	192.98	184.44	177.52	185.82	92.37	200.44	225.42	291.35	193.44	92.367	254.54	220.24	227.94	230.49	234.22	92.369	228.34	266.73	308.25	194.6
93.019	215.13	193.21	184.17	189.2	185.9	93.018	200.11	225.4	290.96	193.53	93.02	254.3	220.57	227.59	230.62	234.59	93.015	228.44	263.29	308.63	198.26
93.669	215.62	193.23	184.37	191.37	186.19	93.67	200.68	225.17	291.34	193.11	93.67	254.51	220.84	227.85	231.03	234.3	93.665	228.4	254.83	308.97	195.6
94.32	215.52	193.03	184.66	188.35	186.29	94.318	207.57	225.18	291.06	192.97	94.318	254.59	220.57	228.04	230.62	235.96	94.315	228.37	250.29	308.6	191.99
94.968	215.43	192.78	184.69	190.47	185.94	94.97	209.72	225.3	291.61	193.17	94.97	254.69	220.34	227.47	230.88	251.02	94.965	228.2	249.14	308.54	190.61
95.62	219.28	192.84	184.83	191.56	186.41	95.618	205.3	225.29	291.39	192.85	95.616	254.77	221.02	227.94	230.64	255.46	95.614	228.5	248.51	308.75	190.52
96.268	218.35	192.57	184.34	189.4	186.39	96.27	201.62	225.18	291.22	192.79	96.266	254.64	220.7	227.71	230.03	251.21	96.265	228.55	247.59	308.82	190.15
96.918	214.9	192.73	184.15	184.52	186.51	96.918	200.18	225.21	291.23	192.59	96.916	254.33	220.7	227.9	230.45	242.29	96.915	228.54	247.59	308.54	190.17
97.568	213.86	193.29	184.41	182.72	186.68	97.57	199.69	228.62	291.16	192.36	97.569	254.85	220.56	227.45	230.39	237.64	97.566	228.35	247.35	308.57	189.42
98.218	213.21	192.93	184.51	181.03	186.91	98.219	199.5	237.15	291.41	192.24	98.219	254.58	220.39	227.77	230.28	236.06	98.218	228.49	247.24	308.49	189.77
98.868	212.8	192.92	184.8	180.9	186.9	98.868	199.57	236.41	291.27	192.47	98.865	254.89	220.73	228.15	230.17	235.49	98.87	228.86	247.13	308.71	189.68
99.518	211.93	192.74	184.39	180.34	186.97	99.518	199.72	231.38	291.35	192.47	99.517	254.78	221.07	228.06	230.19	234.98	99.514	228.72	247.47	308.72	189.66
100.168	211.9	192.88	184.82	183.51	187.06	100.169	199.56	226.6	291.18	192.59	100.166	255.01	220.78	227.52	230.19	235.11	100.164	228.62	246.82	308.85	189.21
100.818	211.96	193.17	184.68	191.37	187.19	100.819	199.34	224.66	290.96	192.5	100.82	254.61	221.04	227.96	230.44	235.01	100.814	228.47	246.99	308.58	189.15
101.468	211.6	193.48	185.06	192.24	187.32	101.469	199.63	224.38	291.05	192.6	101.466	254.88	221.5	227.86	230.29	234.81	101.465	228.38	247.04	308.2	189.07
102.119	211.74	193.56	184.63	188.81	187.36	102.119	199.62	223.93	290.88	192.43	102.116	255.18	220.94	228.01	230.57	234.42	102.119	228.38	247.05	308.58	189.21
102.769	211.68	193.28	184.92	184.25	190.82	102.769	199.42	223.74	291.08	192.44	102.769	255.34	221.31	227.63	230.17	234.22	102.768	228.67	247.38	308.15	188.63
103.418	211.81	193.47	185	181.95	204.85	103.419	199.2	223.95	291.17	192.44	103.415	255.4	221.18	228	230.43	234.27	103.414	228.86	246.93	308.33	188.4
104.069	211.8	193.36	185.51	181.3	208.25	104.07	199.38	223.97	291.1	192.15	104.066	255.15	221.24	227.7	230.02	234.09	104.064	228.65	247.43	308.32	189.09
104.719	211.94	193.5	185.15	181	205.46	104.718	199.49	223.83	291.08	191.7	104.72	255.23	220.89	227.74	230.18	244.5	104.719	228.66	246.94	308.18	188.6
105.369	212.03	193.45	185.55	180.95	198.28	105.368	199.14	224.29	291.13	192.03	105.366	255	220.67	227.56	229.58	251.73	105.369	228.56	247.45	308.53	188.09
106.019	211.86	193.48	185.26	180.55	193.29	106.018	199.28	224.03	290.96	191.64	106.016	255.19	221.05	228.01	229.89	247.5	106.014	228.63	247.1	308.02	188.23
106.668	212.07	193.15	185.69	180.87	191.18	106.668	199.52	223.98	290.88	191.85	106.67	255.49	220.9	227.43	229.76	239.61	106.664	228.42	246.88	308.07	188.28
107.318	212.2	193.36	185.5	180.51	190.37	107.32	199.35	224.1	290.99	191.58	107.32	255.51	220.81	227.62	229.61	236.72	107.318	228.6	246.99	308.07	188.61
107.968	212.54	193.74	185.51	180.62	189.57	107.968	199.36	223.73	291.19	191.95	107.966	255.65	221.76	227.56	230.3	235.74	107.965	228.82	247.02	308.35	187.9
108.619	212.41	193.45	185.49	180.93	189.37	108.62	199.74	224.05	290.96	191.95	108.616	255.58	221.86	233.92	230.47	235.79	108.619	228.62	246.82	308.34	188.29
109.269	212.48	193.5	185.72	180.92	189.38	109.269	199.47	224.18	291.01	191.81	109.269	255.73	222.25	236.68	229.87	235.5	109.269	228.95	247.02	308.08	188.47
109.919	212.66	194.01	185.72	180.56	189.13	109.918	199.45	224.14	291.03	191.57	109.92	255.31	223.99	233.15	230.25	235.25	109.919	229.07	246.5	307.97	188.6
110.569	212.55	193.08	185.73	180.58	189.21	110.568	199.36	224.13	290.93	191.77	110.57	255.56	227.22	229.01	230.08	235.09	110.565	228.85	247.1	308.25	188.18
111.219	212.9	193.52	185.87	180.95	188.95	111.219	199.69	223.87	290.97	191.71	111.215	255.31	225.74	226.85	230.16	234.78	111.219	228.49	246.86	308.57	188.16
111.869	212.73	193.9	186.23	180.81	189.07	111.868	199.42	224.08	290.72	191.63	111.865	255.34	222.33	226.16	229.67	234.58	111.864	229.01	246.89	308.06	188.39
112.519	212.78	193.92	186.51	181.05	189.31	112.519	199.68	224.35	290.91	191.48	112.515	255.98	222.13	225.29	230.07	234.46	112.514	228.92	246.8	307.92	188.64
113.169	212.48	194.36	186.13	180.59	189.39	113.17	199.82	223.96	290.99	191.85	113.165	255.54	220.98	224.99	229.75	234.21	113.164	229	246.87	308.22	188.4
113.819	213.02	196.2	186.01	180.9	189.22	113.82	199.67	223.94	291.17	191.83	113.819	258.18	223.34	225.11	229.95	234.47	113.814	228.8	246.97	308.41	188.3
114.469	212.76	195.48	186.05	180.98	188.87	114.466	199.66	224.09	290.81	191.99	114.465	258.81	221.38	225.45	229.3	234.25	114.466	229.14	246.7	308.32	187.8
115.119	212.68	193.57	188.79	180.73	188.81	115.12	199.54	224.07	291.03	191.57	115.115	257.06	220.62	225.2	229.77	234.57	115.119	229.46	246.91	308.21	188.19
115.769	214.07	193.96	193.8	180.94	188.47	115.769	199.93	224.45	291.11	191.74	115.765	254.37	220.65	225.43	237.29	234.14	115.769	229.21	246.91	307.94	188.14
116.419	216.83	194.21	193.44	181.09	188.65	116.419	200.02	223.94	290.94	191.99	116.415	254	220.3	225.22	250.64	234.32	116.418	229.25	247.01	308.24	188.42
117.07	215.22	193.41	189.24	181.06	188.54	117.071	199.99	224.48	291.07	191.85	117.065	253.21	220.4	225.55	250.68	234.5	117.063	229.41	246.59	308.33	188.16
117.718	213.33	193.07	185.59	180.63	188.34	117.719	199.77	223.95	290.99	191.37	117.718	252.62	220.85	225.6	243.85	234.26	117.719	229.17	246.93	308.4	188.04
118.37	212.87	193.34	184.5	188.45	188.38	118.369	199.66	224.17	290.75	191.83	118.366	252.35	221	225.82	236.06	233.89	118.368	229.07	247.05	308.35	187.98
119.019	212.13	193.59	184.7	195.47	188.42	119.019	199.89	229.57	290.99	191.69	119.016	251.93	220.51	225.7	232.7	234.35	119.014	228.89	247.09	308.47	188.16
119.669	211.45	193.43	184.75	194	188.66	119.67	199.88	236.22	290.67	191.42	119.666	252.32	220.04	225.55	230.95	234.34	119.664	229.06	246.48	308.52	188.24
120.319	211.35	193.21	184.59	188.33	188.21	120.32	199.68	234.9	290.85	191.52	120.316	251.79	220.76	225.61	230.78	234.18	120.314	229.4	246.89	308.32	188.25
120.969	211.49	193.33	184.41	184.06	188.25	120.97	205.62	229.68	290.72	191.47	120.97	252.25	220.75	225.8	230.47	234.24	120.97	228.98	247.16	308.31	188.3
121.619	211.18	193.29	184.28	182.46	197.21	121.62	209.4	224.96	290.93	191.19	121.616	252.13	220.99	226.37	230.65	234.35	121.619	229.13	246.64	308.15	187.99
122.269	211.25	193.06	184.76	182.12	207.14	122.27	205.63	224.1	290.61	191.34	122.269	252.02	220.81	226.01	230.53	234.4	122.265	229.38	246.98	308.21	187.9
122.919	211.32	192.76	184.79	182.07	207.39	122.921	201.69	223.99	290.64	191.19	122.915	252.19	221.31	225.79	230.43	234.16	122.915	229.59	247.19	308.53	188.29
123.57	211.03	192.95	185	181.78	200.9	123.569	200.07	223	290.63	191.68	123.568	252.7	220.49	226.49	230.7	233.95	123.563	229.88	246.78	308.52	187.91
124.218	211.2	193.43	184.51	181.37	195.49	124.221	199.61	223.76	290.86	191.59	124.216	252.59	220.6	225.83	230.6	233.98	124.214	229.33	246.99	308.16	188.59
124.87	211.1	192.79	184.61	181.25	192.44	124.87	199.6	223.65	290.84	191.66	124.864	252.7	220.96	226.08	230.59	234.06	124.864	234.32	247.37	308.66	187.96
125.518	211.36	192.9	184.98	181.28	191.35	125.52	199.06	223.3	290.82	191.6	125.52	252.74	220.72	226.45	230.22	234	125.519	236.23	247.01	308.4	188.06
126.17	211.29	192.6	184.87	181.28	190.97	126.17	199.24	223.47	290.97	191.45	126.166	252.97	221.34	226.28	230.4	234.39	126.166	232.23	246.65	308.31	187.95
126.819	211.29	192.64	184.96	181.14	190.81	126.82	199.23	223.13	290.74	191.35	126.819	253.17	220.97	232.43	230.37	233.99	126.815	229.59	246.88	308.09	188.2
127.468	211.71	192.72	185.4	181.33	190.28	127.469	198.96	223.67	290.72	191.36	127.465	253.5	221.48	235.11	230.43	234.16	127.464	228.15	246.71	308.34	188.05
128.118	211.4	192.69	184.97	181	189.8	128.121	199.15	223.35	290.58	191.38	128.115	253.57	221.11	231.95	230.35	234.04	128.12	228.11	246.83	308.91	187.52
128.768	211.58	193	185.06	181.15	189.99	128.769	199.03	223.59	290.59	191.41	128.765	253.63	221.5	228.22	230.66	234.12	128.765	228.13	247.09	308.73	187.43
129.418	211.55	192.23	185.09	181.14	189.96	129.421	199.02	223.42	291.09	191.19	129.415	253.5	220.83	226.81	230.56	234.2	129.421	228.28	247.14	308.62	187.83
130.069	211.59	192.48	185.27	180.89	189.64	130.069	198.84	223.39	290.83	191.78	130.065	253.5	226.13	225.3	230.18	234.09	130.07	227.87	247.1	308.48	187.86
130.719	211.63	192.32	185.57	181.11	189.22	130.719	199.22	223.57	290.89	191.42	130.719	253.89	224.68	225.38	230.77	234.39	130.72	228.2	247.33	308.54	188.05
131.369	211.75	192.61	185.53	181.11	189.2	131.371	199.21	223.45	290.72	191.54	131.364	253.95	222.16	224.86	230.16	234.14	131.366	228.08	246.91	308.48	188.04
132.02	212.33	192.71	185.59	181.07	189.39	132.019	198.58	223.42	290.58	191.22	132.016	254.24	221.17	225.3	230.19	234.26	132.016	228.35	246.86	308.64	188.12
132.67	211.82	194.13	185.26	180.62	189.3	132.669	199.02	223.55	290.8	191.58	132.664	254.32	220.38	225.08	230.26	233.95	132.666	228.29	247.04	308.43	187.85
133.319	211.88	195.72	185.91	181.14	189.23	133.32	199.17	223.87	290.91	191.62	133.316	254.14	220.41	225.21	230.69	234.01	133.32	228.7	254.37	308.28	187.98
133.969	212.19	194.86	185.63	180.81	188.84	133.97	199.02	223.71	290.41	191.34	133.966	254.2	220.47	224.91	230.53	233.81	133.97	228.25	267.68	308.67	188.26
134.618	212.13	192.51	185.66	180.95	188.77	134.618	199.3	223.7	290.71	191.34	134.614	254.03	220	225.31	230.11	233.98	134.615	228.22	267.15	308.61	188.12
135.269	212.19	192.22	185.84	180.69	188.97	135.271	198.76	223.63	290.68	191.51	135.265	254.24	220.2	224.95	230.23	234.09	135.265	228.36	258.97	308.54	188.01
135.919	212.13	193.02	186.22	180.72	188.43	135.919	199.01	223.82	290.61	191.55	135.919	254.22	219.91	225.24	230.34	233.84	135.915	228.49	252.71	308.17	188.33
136.569	212.22	193.82	185.99	180.92	188.85	136.57	199.24	223.88	290.43	191.39	136.569	255.05	219.89	225.37	230.16	233.9	136.569	228.81	249.77	308.12	188.12
137.219	212.47	193.11	186.1	180.73	188.79	137.214	198.78	223.27	290.63	191.41	137.214	258.18	220.3	225.63	229.74	233.92	137.215	228.38	248.77	308.37	188.53
137.869	212.39	192.94	185.96	180.63	188.46	137.87	199.29	223.44	290.48	191.64	137.866	257.41	220.4	226.02	230.2	233.97	137.865	230.19	248.15	308.64	196.74
138.519	212.22	192.66	186.17	180.7	188.69	138.52	199.34	223.35	290.16	191.45	138.516	254.49	219.99	225.21	230.04	234.38	138.519	234.19	247.74	308.36	199.46
139.169	212.51	193.28	185.98	180.62	188.61	139.17	199.18	223.47	290.25	190.97	139.166	254.25	220.53	225.41	230.3	233.59	139.165	232.85	247.64	308.38	197.95
139.819	212.78	192.81	185.98	180.59	188.41	139.82	199.52	223.57	290.59	196.08	139.82	253.02	220.03	225.74	230.42	233.96	139.815	229.61	247.29	308.22	193.68
140.469	212.79	192.69	185.99	180.7	188.46	140.47	199.1	223.45	290.43	201.46	140.466	252.66	220.7	225.86	230.1	233.94	140.466	228.4	247.43	308.53	191.26
141.119	212.79	192.88	186.07	181.47	188.77	141.119	199.3	223.23	290.25	199.99	141.115	252.18	220.84	225.96	229.89	234.18	141.12	228.01	247.51	308.65	190.56
141.769	212.82	192.57	186.02	195.06	188.64	141.769	199.42	223.37	290.31	196.59	141.765	252.29	220.74	226.06	229.95	233.5	141.766	227.92	247.44	308.46	190.47
142.419	212.83	192.51	186.55	196.21	188.93	142.419	199.31	223.79	290.4	194.11	142.416	251.75	220.83	226.14	230.28	233.89	142.42	227.99	247.65	308.27	190.33
143.07	212.85	192.14	186.44	191.32	188.55	143.069	199.3	223.77	290.36	193.98	143.069	251.75	221.19	226.18	230.35	234.07	143.064	227.89	247.52	308.17	190.01
143.719	213.39	192.39	186.54	185.51	188.43	143.719	199.15	223.88	290.44	193.01	143.716	251.91	220.85	226.14	229.85	233.86	143.716	228.05	247.17	308.09	189.49
144.369	213.11	192.34	186.51	183.02	188.36	144.369	199.55	223.69	290.56	193.05	144.366	251.97	220.81	225.99	230.05	234.23	144.365	227.95	247.43	308.52	189.46
145.02	213.11	192.08	186.83	182.19	188.72	145.019	199.31	223.79	290.33	192.47	145.015	251.93	221.09	226.01	229.96	233.86	145.015	228.37	247.08	308.38	189.38
145.669	213.53	192.26	186.51	181.52	188.31	145.67	199.3	223.69	290.41	192.75	145.665	251.8	223.16	226.47	229.78	233.98	145.665	228.24	247.11	308.06	188.7
146.318	213.28	192.38	186.18	181.32	188.71	146.32	199.41	223.27	290.28	191.96	146.32	253	225.03	226.55	229.98	234.83	146.315	228.54	247.23	308.6	189.22
146.97	213.11	192.27	186.31	181.22	188.42	146.97	199.28	224.09	290.52	192.05	146.966	252.23	222.84	225.92	229.73	233.91	146.969	228.32	247.17	308.63	189.1
147.618	213.25	192.29	186.53	181.19	188.48	147.619	199.47	223.68	290.47	196.96	147.616	252.43	222.59	226.1	230	233.79	147.619	228.2	246.7	307.92	188.6
148.27	213.17	192.49	186.38	181.02	188.6	148.27	199.19	223.51	290.2	199.31	148.27	252.67	221.89	226.78	235.84	234.23	148.269	228.24	247.7	308.01	188.26
148.918	212.97	192.48	186.48	181.19	188.34	148.92	199.53	223.33	290.15	197.56	148.921	252.31	220.26	226.69	250.93	233.57	148.915	228.46	247.07	307.88	188.02
149.568	212.96	192.4	186.32	180.74	188.59	149.57	199.05	223.56	290.15	194.2	149.569	252.6	220.3	233.81	251.37	233.78	149.569	228.52	247.12	308.36	188.68
150.22	213.48	192.08	187.1	181.16	188.37	150.22	199.49	224.13	290.37	194.31	150.217	253.31	220.28	234.55	244.37	233.8	150.215	228.2	247.45	308.15	188.35
150.868	213.58	192.36	192.68	180.78	188.51	150.87	199.6	224.2	290.34	193.52	150.869	253.81	220.51	230.84	236.26	233.6	150.869	228.6	247.01	308.26	188.77
151.518	213.5	192.22	193.75	181.14	188.57	151.52	199.5	223.92	290.2	193.2	151.521	253.28	220.2	227.29	232.89	233.62	151.52	228.78	247.07	308.3	188.5
152.17	213.67	192.61	191.55	180.54	188.71	152.17	199.79	223.87	290.15	193.03	152.169	254.44	220.49	225.67	230.97	233.9	152.164	228.2	247.02	308.42	187.74
152.82	213.38	192.41	185.86	181.02	188.62	152.818	199.58	223.9	290.05	192.64	152.819	256.79	219.9	224.94	230.47	233.74	152.814	228.36	254.05	308.13	188.61
153.469	213.3	192.31	184.54	180.8	188.68	153.47	199.2	223.46	289.73	192.52	153.47	254.86	219.84	224.82	229.8	233.56	153.466	228.5	266.89	308.38	188.27
154.119	213.37	193.03	184.1	180.58	188.49	154.118	199.4	223.47	290.09	192.56	154.116	254.14	220.5	225.02	230.13	233.99	154.12	228.29	265.1	308.15	187.92
154.769	213.67	192.98	184.1	181.02	188.15	154.77	199.75	223.73	290.28	192.46	154.77	253.87	219.9	224.55	230.43	233.9	154.764	228.35	256.96	308.31	187.65
155.419	213.72	192.81	184.37	180.56	188.31	155.418	199.49	223.78	290.42	192.45	155.418	252.49	219.69	224.32	230.41	233.65	155.415	228.56	251.66	308.22	188.15
156.069	213.81	192.57	184.34	180.44	188.45	156.07	199.73	223.84	290.37	192.18	156.066	251.56	219.92	224.54	230.33	233.77	156.065	228.35	249.37	308.32	188.29
156.72	213.55	191.86	184.06	181.94	188.83	156.72	203.06	223.48	290.23	192.29	156.714	251.26	220.16	224.39	229.88	234.05	156.718	228.83	249.04	308.25	187.89
157.37	213.42	192.56	184.19	193.88	188.57	157.37	209.36	223.65	290.47	192.25	157.369	251.58	220.16	224.89	230.17	233.73	157.366	228.79	248.16	308.52	187.88
158.02	213.61	192.98	184.63	195.65	188.66	158.02	207.5	223.76	290.22	192.29	158.02	251.62	220.77	224.91	229.8	234.07	158.02	228.43	247.48	308.24	191.25
158.67	213.84	192.53	184.57	191.09	188.54	158.669	202.47	223.65	290	192.34	158.67	251.28	220.4	225.01	230.26	233.95	158.669	228.24	247.84	308.47	197.63
159.318	213.66	192.56	184.66	185.2	188.51	159.32	200.18	223.82	290.12	195.14	159.32	251.81	220.65	224.92	230.28	234.1	159.315	228.76	247.74	308.37	197.45
159.97	213.93	192.51	184.63	183.01	188.7	159.968	198.89	223.55	290	199.45	159.969	251.88	220.14	224.9	229.83	233.76	159.965	228.67	247.74	308.12	194.4
160.618	213.75	192.9	184.19	181.95	188.38	160.62	198.73	223.85	289.93	199.37	160.62	251.8	220.42	224.91	230.15	233.58	160.615	228.3	247.57	308.34	190.98
161.269	213.79	192.89	184.36	181.62	188.5	161.269	198.68	223.72	289.99	195.85	161.27	251.71	224.28	224.84	230.09	233.75	161.269	228.59	247.1	308.24	190.17
161.919	213.86	192.94	184.29	181.52	188.34	161.918	198.57	223.84	290.04	193.87	161.92	251.61	224.37	224.75	229.9	233.74	161.915	228.75	247.06	307.81	189.88
162.569	213.85	193.63	184.55	180.91	188.31	162.568	198.73	224.08	290.17	193.56	162.57	252.24	222.78	225.08	229.81	234.05	162.565	228.93	247.49	308.01	189.8
163.218	213.95	193.88	184.72	181.26	188.71	163.22	198.48	223.45	289.85	192.89	163.22	252.37	220.98	225.26	230.17	233.92	163.215	228.69	247.26	308.01	189.31
163.869	214.69	192.99	184.75	181.28	188.64	163.868	198.26	223.63	290.42	192.61	163.869	252.32	219.97	225.36	229.83	233.59	163.869	229.16	247.24	307.92	189.68
164.519	217.92	193.64	184.85	180.94	188.48	164.519	198.18	223.38	290.1	192.61	164.519	252.59	219.97	225.48	230.02	233.89	164.519	229.08	246.8	307.84	189.76
165.169	216.64	193.36	184.72	180.8	188.88	165.169	198.62	223.73	289.91	192.68	165.169	252.74	220.08	225.38	230.44	233.71	165.164	229.04	247.23	308.36	189.32
165.82	213.03	193.15	184.68	181.45	188.28	165.82	198.33	224.01	290.22	192.65	165.819	252.79	219.92	225.56	230.08	233.79	165.818	230.05	246.69	308.23	188.9
166.47	212.47	193.21	185.3	181.1	188.61	166.464	198.4	223.49	289.75	192.73	166.469	253.42	220.2	225.72	229.82	233.92	166.468	234.76	246.98	308.07	188.42
167.118	211.96	193.36	185.5	180.84	188.55	167.12	198.41	224.87	289.86	192.13	167.119	252.88	220.28	225.3	229.96	233.61	167.116	233.74	246.91	308.03	188.81
167.77	211.26	193.15	185.42	180.99	188.79	167.769	198.55	235.15	289.93	192.49	167.769	255.59	220.82	225.51	229.67	234.15	167.764	230.41	247.18	308.06	188.55
168.42	211.9	193.31	185.36	180.63	188.56	168.419	198.2	237.07	289.94	192.42	168.419	256.67	219.98	225.8	230.01	233.85	168.416	228.95	246.94	307.9	188.8
169.07	211.27	193.25	185.46	181.05	188.49	169.07	198.48	233.17	289.98	192.5	169.069	254.05	220.23	225.47	230.2	234.37	169.065	227.69	247.14	308.08	188.34
169.72	211.27	193.05	185.3	180.98	188.47	169.719	198.36	226.79	290.03	192.19	169.719	253.78	220.45	231.08	229.74	233.91	169.715	227.47	247.03	308.19	188.73
170.368	211.29	193.81	185.75	180.49	188.72	170.369	198.63	223.87	289.95	192.34	170.369	252.6	220.58	234.88	230.49	233.77	170.369	228.03	247.06	308.31	188.6
171.019	210.81	193.3	185.63	180.57	188.1	171.019	198.51	222.68	289.79	192.08	171.019	251.75	220.38	232.87	229.79	233.79	171.02	227.8	246.92	308.37	188.68
171.669	211.12	192.53	185.89	180.99	188.39	171.669	198.95	222.65	289.7	191.81	171.668	251.16	220.65	228.86	229.56	233.34	171.664	227.87	246.87	307.9	188.44
172.319	211.19	193.03	185.5	180.8	188.4	172.319	198.72	222.64	289.83	191.93	172.32	251.41	220.66	226.2	229.49	233.75	172.32	227.79	246.73	307.7	187.88
172.969	211.02	193.37	186.24	180.87	188.45	172.966	198.48	222.72	289.67	191.83	172.968	251.21	220.74	224.92	229.65	233.81	172.964	227.96	246.86	307.79	188.34
173.619	211.52	193.56	186.1	180.67	188.31	173.618	198.51	222.7	289.67	191.95	173.62	251.52	220.8	224.93	230.26	234.18	173.616	227.93	247.1	307.87	188.15
174.268	211.66	193.54	185.49	180.91	188.68	174.27	198.7	222.85	289.71	191.83	174.268	251.26	221.15	224.44	229.73	233.73	174.27	227.38	247.5	308.07	195.32
174.919	211.15	193.73	186.26	180.6	188.77	174.919	199.02	222.75	289.95	191.84	174.92	251.47	220.7	224.48	229.7	233.78	174.914	227.64	247.04	308.22	199.03
175.569	211.76	193.67	186.29	180.68	188.43	175.571	198.79	222.44	289.51	191.76	175.568	251.49	220.92	224.52	229.71	233.62	175.565	227.88	247.17	308.23	196.47
176.219	211.65	193.34	186.13	180.45	188.68	176.219	198.75	222.52	289.47	191.76	176.22	251.63	221.06	224.4	230	234.39	176.214	227.79	247.18	307.98	192.68
176.869	211.79	193.21	186.48	180.68	188.72	176.869	198.8	222.5	289.68	191.63	176.869	251.68	220.85	224.61	230.03	233.65	176.869	227.86	246.93	307.74	190.46
177.52	212.07	193.43	186.25	180.27	188.68	177.521	198.94	223.15	289.7	191.64	177.519	251.8	221.51	224.72	230	233.82	177.515	228.35	246.74	307.21	190.19
178.169	211.96	193.15	186.31	180.57	188.17	178.169	198.8	222.32	289.72	192.08	178.168	251.97	221.12	224.54	229.63	233.92	178.169	227.83	246.76	307.53	189.61
178.82	212.08	192.82	186.24	180.5	188.44	178.821	198.95	222.57	290.06	191.72	178.819	252.12	223.77	224.25	229.24	233.43	178.813	227.88	246.78	307.77	189.51
179.468	211.99	193.19	186.09	180.45	188.36	179.469	198.91	222.47	289.76	191.48	179.469	252.43	225.94	225.03	229.52	233.78	179.465	228.07	246.48	307.81	189.6
180.12	211.9	193.36	186.35	180.23	188.3	180.121	198.77	222.61	289.75	191.72	180.119	252.8	223.19	224.49	229.31	234.53	180.12	228.32	255.21	307.74	189.71
180.768	212.07	193.87	186.24	180.56	188.42	180.769	199.02	222.93	290.1	191.85	180.769	252.4	221.81	224.74	229.56	249.75	180.767	228.28	267.36	307.71	189.33
181.418	212.15	193.34	186.45	179.97	188.28	181.421	198.94	222.83	289.78	191.89	181.419	253.15	221.19	225.48	229.7	254.86	181.414	228.52	265.88	307.71	189.67
182.068	212.3	193.27	186.77	180.45	188.78	182.071	199.03	222.5	289.71	191.98	182.069	252.96	220.39	225.36	229.61	250.52	182.068	228.41	257.4	308.18	189.15
182.718	212.19	193.57	186.54	180.47	188.66	182.716	199.19	222.64	290.01	191.17	182.72	253.48	219.8	225.08	229.66	241.95	182.719	228.34	251.43	307.95	188.89
183.368	212.21	193.83	186.24	180.43	188.68	183.369	199.02	222.82	289.92	191.7	183.37	253.19	219.52	225.41	229.47	237.73	183.369	228.61	249.04	307.5	188.97
184.018	212.42	193.71	186.82	180.64	188.55	184.02	198.85	223.27	290	191.82	184.018	253.52	219.96	224.61	230.1	236.04	184.019	228.55	248.56	307.91	189.15
184.668	212.31	193.41	193.05	180.17	188.57	184.67	199.03	222.72	289.87	191.64	184.67	253.91	219.83	225.29	229.46	234.5	184.668	228.45	247.76	307.58	188.27
185.318	212.43	193.71	194.38	179.83	188.41	185.32	199.15	222.9	289.8	191.52	185.319	253.61	219.77	225.24	230	234.37	185.319	228.38	247.49	307.58	188.09
185.968	212.49	193.72	190.46	180.03	188.19	185.968	198.95	222.86	289.82	191.45	185.969	253.88	219.95	225.51	229.56	234.58	185.969	228.39	247.31	307.35	187.95
186.618	212.53	193.56	185.94	179.85	188.29	186.62	198.89	222.96	290.05	191.29	186.619	253.78	219.99	225.64	229.33	234.38	186.619	228.62	247.39	307.82	188.34
187.269	212.56	193.81	183.86	179.98	187.97	187.27	199.12	222.93	289.88	191.84	187.268	254.05	220.17	225.71	230.19	234.67	187.269	228.2	247.4	308.22	188.07
187.919	212.44	193.31	183.98	179.91	188.23	187.921	199.4	223.04	289.86	191.58	187.92	253.82	219.68	225.42	229.65	234.39	187.92	228.51	247.97	308.1	188.19
188.57	212.47	194.01	183.93	179.52	187.85	188.569	199.1	223.11	289.93	191.15	188.569	254.05	220.26	225.93	229.92	234.02	188.568	228.46	247.51	308.19	188.17
189.218	212.4	193.77	184.02	179.81	187.92	189.219	199.28	223.04	289.79	191.28	189.219	254.07	220.06	225.52	229.75	234.43	189.22	228.28	247.47	308.34	188.03
189.87	212.67	193.38	183.97	179.72	188.14	189.869	199.23	222.66	289.85	191.58	189.869	254.27	220.17	225.86	229.43	233.53	189.868	228.6	247.47	307.85	188.45
190.52	212.81	193.51	184.03	179.88	188.21	190.521	199.17	223.2	289.6	191.1	190.519	254.14	219.9	225.92	229.42	234.24	190.52	228.49	247.69	307.81	188.62
191.169	212.75	193.39	183.87	180.14	188.04	191.165	200.8	222.96	289.66	191.21	191.169	254.15	220.67	225.46	230.08	233.56	191.17	228.77	247.53	307.97	188.01
191.819	212.88	193.63	183.9	179.99	188.28	191.821	207.88	223.1	289.94	191.43	191.819	254.28	220.3	225.69	229.36	233.68	191.82	228.6	247.13	308.01	187.87
192.469	212.95	193.81	183.76	179.79	188.22	192.468	207.49	223.14	299.97	191.31	192.468	254.47	220.63	225.73	229.4	233.08	192.47	228.56	246.92	308	188.17
193.121	213.15	194.16	184.36	179.95	188.43	193.12	202.24	223.21	312.16	191.17	193.119	254.14	220.68	225.94	229.34	233.35	193.119	228.8	247.14	307.75	188.15
193.769	213.33	193.63	183.7	180.07	188.4	193.769	199.49	223	310.85	191	193.769	257.16	220.85	226.17	229.49	233.11	193.769	228.38	246.92	307.59	188.25
194.421	212.92	193.74	184.19	180.18	188.49	194.419	198.52	223.03	304.41	191.07	194.419	257.01	221.46	225.82	229.4	233.37	194.419	228.64	247	308.14	189.71
195.069	215.66	193.58	183.99	180.16	188.3	195.069	198.46	222.99	297.73	191.27	195.069	253.87	225.67	230.14	229.51	233.48	195.069	228.81	247.01	308.04	197.13
195.719	216.79	193.46	183.92	179.88	187.94	195.714	198.28	222.99	294.89	191	195.719	253.91	224.2	234.93	229.3	247.13	195.718	228.5	250.09	307.79	198.61
196.369	214.01	193.18	184.4	179.99	188.5	196.369	198.24	223.13	292.93	191.03	196.369	253.2	222.45	233.13	229.23	253.47	196.37	228.46	264.75	307.95	195.07
197.021	211.16	193.38	184.33	179.47	188.18	197.019	198.1	222.79	292.36	190.86	197.019	252.6	220.73	228.77	228.97	247.65	197.018	228.71	265.85	308.49	191.87
197.67	211.4	193.93	184.1	179.61	188.11	197.67	198.12	223.27	291.93	194.03	197.668	252.41	220.39	226.29	229.03	239.55	197.67	228.56	258.58	307.95	190.34
198.32	210.31	193.49	184.29	179.52	188.19	198.32	198.34	223.11	291.44	199.04	198.318	251.99	220.78	225.24	237.41	236.4	198.319	228.97	251.8	307.74	189.87
198.97	210.5	193.64	184.51	179.49	188.24	198.97	198.44	222.75	290.45	199.46	198.968	251.99	220.17	225	251.06	235.09	198.969	228.64	249.74	308.22	189.77
199.621	210.46	195.8	184.41	179.58	188.07	199.62	198.26	230.07	290.46	196.18	199.618	251.4	220.14	224.82	250.68	234.21	199.619	228.55	248.71	307.69	189.23
200.27	210.23	196.7	184.52	179.32	188.11	200.27	198.11	236.17	289.94	193.85	200.269	251.4	219.91	224.25	242.64	233.99	200.269	228.72	247.7	307.74	189.82
200.92	210.63	194.44	184.63	179.36	198.2	200.92	197.9	234.98	289.82	192.68	200.918	251.8	220.12	224.06	235.78	234.16	200.918	228.34	247.63	308.02	189.47
201.57	210.43	192.95	184.57	179.88	207.9	201.57	198.11	228.71	289.84	191.83	201.569	251.93	220.26	224.24	232.07	234.23	201.57	228.95	247.54	307.69	189.43
202.22	210.62	191.9	185.01	179.71	208.66	202.216	198.18	223.92	289.39	191.53	202.219	251.98	219.61	224.52	230.5	233.74	202.218	228.94	247.49	307.95	189.46
202.87	210.65	192.15	185.18	179.73	203.86	202.869	197.91	222.63	289.15	191.53	202.87	251.83	219.84	224.67	230.04	233.61	202.87	228.96	247.58	308.14	189.26
203.52	210.52	192.79	185.11	179.41	196.59	203.519	198.22	222.15	288.86	191.34	203.52	252.37	220.31	224.54	229.41	234	203.519	228.75	247.45	307.99	189.1
204.169	210.71	192.89	185.08	179.84	192.94	204.169	197.95	222.15	289.04	191.73	204.169	252.26	220.21	224.35	229.69	234.03	204.169	233.78	247.46	307.9	188.41
204.82	210.78	193.19	185.09	179.49	191.15	204.819	198.05	222.22	288.62	191.42	204.819	252.48	220.19	224.91	229.62	234.11	204.819	236.68	247.22	307.78	188.48
205.47	210.91	193.48	185.19	180.07	190.24	205.465	197.84	222.19	289.17	191.4	205.469	253.06	220.04	224.88	229.83	234	205.471	233.14	247.36	307.87	188.28
206.119	211.1	192.66	185.35	179.96	189.86	206.12	198.19	221.92	288.77	191.39	206.119	253.26	220.3	224.94	229.62	233.75	206.119	229.39	247.07	307.66	188.56
206.769	210.74	193.11	185.34	179.33	189.65	206.768	197.77	221.75	288.63	191.22	206.769	256.07	220.12	224.93	229.66	233.67	206.768	227.83	247.03	307.41	188.21
207.419	211.02	192.26	185.3	179.48	189.17	207.42	197.88	222.64	288.82	191.33	207.419	256.21	219.53	225.59	230.03	233.73	207.418	228.18	247.59	307.89	188.51
208.069	211.07	192.36	185.28	179.75	189.28	208.07	198.16	222.45	288.92	191.23	208.069	254.16	220.35	225.15	229.33	233.63	208.068	227.54	259.47	308.16	188.65
208.719	211.1	192.38	185.48	179.89	188.75	208.719	198.15	222.09	288.94	191.57	208.719	254.39	220.42	225.24	229.14	233.71	208.718	227.53	266.15	307.99	188.51
209.37	211.23	192.01	185.36	179.59	188.75	209.37	198.25	222.35	288.56	191.59	209.369	253.01	220.41	225.2	229.23	233.69	209.37	227.35	261.96	308.02	187.84
210.02	211.17	192.44	185.52	179.52	188.91	210.02	198.37	222.56	288.5	191	210.019	252.3	220.43	225.26	229.11	233.37	210.019	227.22	253.41	307.98	187.91
210.67	211.44	192.04	185.8	179.82	188.63	210.67	198.52	222.22	288.9	191.28	210.67	252.25	220.94	227.35	229.62	233.43	210.669	227.73	249.82	307.62	188.07
211.32	211.4	192.26	185.83	179.39	188.85	211.32	198.39	222.48	288.88	191.29	211.32	251.44	220.66	233.64	229.44	233.31	211.319	227.29	248.62	307.39	187.65
211.968	211.66	192.16	185.6	179.46	188.36	211.97	198.79	222.49	288.93	191.44	211.97	251.37	220.56	234.03	229.11	233.58	211.969	227.52	247.97	307.7	187.86
212.62	211.36	192.13	185.66	179.35	188.29	212.619	198.79	222.62	288.88	191.73	212.621	251.63	220.62	230.25	229.45	233.51	212.619	227.64	248.25	307.76	187.89
213.268	211.56	191.71	185.57	179.72	188.49	213.269	198.74	222.94	288.8	191.65	213.269	251.55	221.1	226.26	228.92	233.29	213.269	227.98	248.33	307.97	188.45
213.92	211.33	191.77	185.61	179.27	188.28	213.92	198.77	222.81	288.82	191.57	213.921	251.89	220.97	225.37	229.33	233.19	213.919	227.71	247.72	308.1	188.31
214.569	211.78	192.29	185.98	179.6	188.53	214.57	198.61	222.6	288.93	191.39	214.57	251.84	221.23	224.21	229.17	233.09	214.569	228.07	247.86	308.16	187.9
215.219	211.51	191.87	185.9	179.49	188.28	215.219	198.92	222.96	288.76	191.31	215.22	251.65	220.95	224.14	228.58	232.91	215.22	227.93	247.3	307.83	187.98
215.869	211.71	192.2	185.66	179.49	187.92	215.869	198.85	222.86	289.2	191.61	215.869	251.88	221.72	223.88	228.88	233.07	215.87	228.22	247.77	307.72	188.16
216.52	211.42	191.68	185.97	179.15	187.71	216.518	198.81	223.29	289.01	191.89	216.521	252.04	226.49	224.27	229.29	233.5	216.518	227.83	247.8	307.71	187.91
217.168	215.5	192.01	185.92	179.07	187.81	217.17	199.02	223.08	288.7	191.5	217.17	252.06	224.55	223.84	229.59	233.34	217.17	227.88	247.43	307.86	187.67
217.82	215.02	192.18	185.68	179.58	187.67	217.818	198.62	222.9	288.72	191.37	217.819	252.96	221.73	224.35	229.6	233.28	217.818	228.44	247.59	308.14	188.13
218.469	211.58	192.2	185.97	179.24	187.61	218.47	199.16	223.21	289.09	194.8	218.47	252.35	220.88	224.27	229.59	233.31	218.469	228.57	247.42	307.74	187.99
219.12	210.69	192.02	186.14	191.67	187.64	219.118	199.13	223.11	289.06	199.66	219.12	252.49	219.98	224	228.81	233.17	219.119	227.98	247.26	308.23	188.04
219.768	210.38	192.28	185.65	197.1	187.33	219.77	198.99	222.79	289.03	198.82	219.769	254.17	219.89	224.06	229.06	233.31	219.769	228.47	247.5	307.87	188.31
220.42	209.79	192.61	185.91	194.09	187.73	220.418	199.06	223.17	289.09	196.13	220.419	255.87	219.71	223.66	229.52	233.25	220.419	228.18	247.59	308.02	188.31
221.069	209.69	192.85	185.93	186.73	187.7	221.07	198.92	223.21	289.01	193.65	221.068	255.4	219.5	224.18	229.25	233.25	221.069	228.41	247.26	307.88	188.3
221.719	209.89	192.84	185.94	183.19	187.75	221.718	199.32	223.01	289.07	193.11	221.72	253.44	220.15	224.61	229.01	233.15	221.719	228.23	247.23	307.75	188.03
222.368	210.02	193.6	186.32	181.21	188.26	222.371	199.24	223.4	289.13	192.52	222.37	253.42	219.91	224.44	229.31	233.22	222.369	228.64	247.65	308.21	188.05
223.019	209.74	195.21	186.16	180.29	187.76	223.019	199.12	223.81	289.25	192.31	223.02	252.39	220.28	224.4	229.11	233.34	223.019	228.23	247.18	308.42	187.86
223.669	209.78	194.81	185.92	179.85	187.48	223.669	199.21	223.53	289.24	192.23	223.67	251.53	220.37	224.55	229.31	233.75	223.669	228.28	247.31	307.8	188.28
224.319	209.86	192.26	186.2	179.41	187.69	224.318	199.23	223.82	289.29	192.08	224.319	251.71	221.06	224.47	229.32	232.76	224.319	228.27	247.57	324.44	187.96
224.969	209.83	192.01	186.16	179.38	187.64	224.97	199.54	223.75	289.25	191.73	224.97	250.98	220.72	224.72	228.97	233.12	224.969	228.87	247.36	338.2	187.74
225.619	210.47	192.64	186.39	179.79	193.58	225.621	199.53	223.58	289.58	192.16	225.62	251.22	220.27	224.83	228.7	233.03	225.619	228.57	246.97	336.31	188.16
226.269	209.99	192.66	185.95	179.3	205.94	226.271	199.24	223.96	289.42	192.06	226.27	251.46	220.17	224.77	229.06	233.04	226.269	228.48	247.11	326.71	187.85
226.919	210.29	192.43	185.94	178.85	208.3	226.919	199.51	224.08	289.35	192.03	226.92	251.29	219.99	224.87	229.2	233.11	226.919	228.78	246.8	318.75	188.12
227.569	210.22	192.3	191.39	179.56	202.87	227.57	204.31	223.79	289.3	192.05	227.57	251.71	220.09	224.88	229.41	233.17	227.569	233.74	246.69	314.99	188.13
228.219	210.19	191.78	194	179.15	196.36	228.219	209.56	224.34	289.48	192.07	228.22	251.39	221	225.08	229.39	232.88	228.219	235.12	247.25	312.69	188.12
228.87	209.85	191.88	191.86	179.14	192.19	228.871	206.24	224.19	289.45	192.63	228.87	252.1	220.13	224.95	229.33	233.11	228.868	230.89	246.97	311.33	187.95
229.518	210.27	192.46	186.77	179.09	191.12	229.52	201.99	224.09	289.55	192.41	229.52	251.48	220.32	224.99	229.09	232.92	229.518	228.77	246.6	310.79	187.79
230.168	210.42	192.3	184.43	179.24	190.21	230.17	200.01	223.93	289.72	191.77	230.169	251.21	220.36	225	229.16	232.94	230.17	227.72	246.98	310.21	188
230.818	210.58	191.86	183.51	178.88	189.6	230.82	199.41	224.07	289.88	192.12	230.819	251.84	220.57	225.16	229.02	232.91	230.818	227.86	247.21	309.67	187.87
231.47	210.46	192.19	183.3	179.11	189.7	231.47	199.14	224.24	289.66	192.2	231.469	251.96	219.98	226.35	229.06	233.1	231.469	227.4	247.36	308.96	187.69
232.118	210.81	191.9	183.7	179.4	189.23	232.121	199.1	224.25	289.86	191.9	232.12	252.25	219.95	233.03	229.11	233.41	232.119	227.27	247.35	308.79	187.95
232.77	210.81	192.04	183.8	179.28	189.45	232.771	199.12	224.4	289.7	192.32	232.77	252.22	220.27	233.2	229.07	233.17	232.769	227.28	247.14	308.8	187.85
233.418	210.85	191.57	183.97	178.9	189.4	233.421	199.07	224.39	290.12	192.01	233.42	252.34	219.94	229.36	229.45	233.06	233.419	227.41	246.79	308.33	187.63
234.068	210.98	191.22	183.69	178.88	188.76	234.071	198.92	224.44	290.01	192.32	234.07	252.52	219.96	225.92	229.09	233.09	234.069	227.42	246.88	308.27	187.91
234.718	210.79	192.3	183.84	179.35	188.96	234.719	198.9	224.44	290.15	192.49	234.719	252.55	220.56	224.64	228.86	233.08	234.719	227.59	246.94	308.04	187.74
235.369	210.77	192	183.42	178.76	188.9	235.371	198.92	224.63	289.91	192.02	235.369	252.65	219.87	223.72	229.07	233.09	235.369	227.62	246.75	308.04	187.71
236.018	211.06	191.61	183.71	178.83	188.68	236.02	199.14	224.7	290	192.15	236.019	252.63	220.16	224.18	229.33	233.4	236.019	227.57	247	307.44	187.58
236.669	210.83	192.09	183.2	178.86	188.58	236.67	198.87	224.48	290.22	192.41	236.669	253.03	220.79	223.25	229.32	233.23	236.668	227.45	246.96	307.55	187.48
237.319	211	191.78	183.36	179.29	188.44	237.32	199.2	224.38	290.35	192.11	237.319	253.11	221.26	223.67	228.99	235.11	237.318	227.73	247.05	307.62	187.75
237.969	211.27	191.91	184.03	178.84	187.95	237.971	199.09	224.56	289.89	191.96	237.97	252.99	221.72	223.86	228.79	250.18	237.968	228.16	247.07	307.51	187.84
238.619	211.02	191.99	183.79	178.91	187.97	238.62	198.98	224.9	290.28	192.17	238.619	253.04	221.56	223.81	229	254.07	238.618	228.12	247.02	307.62	187.94
239.269	211.39	192.39	183.58	178.73	187.89	239.27	199.28	225	290.01	191.98	239.269	253.17	222.29	224	229.44	247.9	239.268	227.9	247.26	307.71	187.78
239.919	211.15	191.88	183.94	178.81	188.04	239.919	199.5	225	290.4	192.31	239.919	253.14	226.72	223.9	229.23	239.75	239.917	227.62	246.92	306.83	188.05
240.569	211.55	192.56	183.88	178.97	188.28	240.57	199.18	224.57	290.21	192.05	240.57	253.21	225.19	224.19	229	236.23	240.569	227.63	247.18	307.21	187.85
241.219	211.32	192.47	183.86	179.03	188.02	241.219	199.35	224.97	290.12	192.12	241.218	255.63	222.08	224.28	229.15	234.49	241.219	227.97	247.02	307.2	187.69
241.869	211.62	192.07	184.62	178.49	188.2	241.871	199.38	224.74	290.28	192.52	241.87	256.74	220.1	224.21	229.03	233.92	241.869	227.93	247.17	307.33	188.04
242.519	211.27	191.89	184.26	188.25	187.96	242.519	199.33	225.12	290.64	192.43	242.519	254.65	219.74	224.52	229.28	233.63	242.518	227.97	246.7	307.43	188.2
243.169	211.71	192.25	184.29	196.12	187.91	243.171	199.14	225.12	290.47	192.48	243.169	253.81	220.07	224.54	228.61	233.56	243.17	227.89	246.92	307.02	188.03
243.819	211.65	192.79	184.33	193.56	187.38	243.82	199.27	224.79	290.38	192.39	243.819	253.41	220.37	224.63	229.05	233.89	243.818	227.69	247.06	307.21	187.91
244.469	213.6	192.51	184.73	186.83	187.81	244.47	199.37	224.88	290.39	192.33	244.47	252.2	220.55	224.04	228.7	233.54	244.47	227.88	247	306.97	187.91
245.119	215.72	195.19	184.91	183	187.57	245.12	199.63	224.99	290.68	192.22	245.118	251.28	220.78	224.65	229.13	233.57	245.12	228.35	247.11	306.97	187.61
245.769	213.58	194.06	184.46	180.89	187.6	245.77	199.6	224.86	290.48	192.46	245.77	251.06	220.74	224.53	228.99	233.4	245.769	227.97	247.36	307.13	188.06
246.42	210.17	191.79	185	180.35	187.74	246.42	199.74	225.21	290.48	192.35	246.418	251.21	221.14	224.93	229.01	233.51	246.419	227.97	247.22	307.18	187.55
247.071	209.59	191.04	184.54	180.29	187.89	247.068	199.45	224.97	290.45	192.41	247.068	251.13	220.63	224.76	229.41	233.51	247.069	228.2	247.16	307.6	187.51
247.719	209.75	191.52	184.74	180.29	188.01	247.719	200	225.07	290.81	192.55	247.718	251.13	221.1	224.99	228.83	233.37	247.719	227.88	246.74	307.03	187.42
248.371	209.45	191.74	185.23	179.76	187.9	248.369	199.6	224.84	290.77	192.52	248.37	250.91	220.46	224.95	228.98	233.09	248.369	228.38	247.22	307.18	188.37
249.019	209.33	192.41	185.33	179.77	187.66	249.019	199.61	229.31	290.7	192.38	249.019	251.64	220.57	224.5	228.68	233.3	249.019	227.89	247.2	306.93	187.97
249.671	209.26	192.17	185.12	179.88	187.75	249.669	199.63	237.62	290.64	192.13	249.669	251.51	221.38	224.69	228.47	236.08	249.67	228.34	247.07	306.54	187.95
250.32	209	192.03	185.29	179.49	187.54	250.319	200.04	237.32	290.73	192.01	250.318	251.37	221.04	224.9	228.65	248.81	250.32	228.15	247.19	306.9	187.76
250.971	209.28	191.85	185.29	179.07	187.41	250.969	200.19	232.13	290.82	192.38	250.969	251.45	221.07	224.91	228.67	251.75	250.968	227.52	247.28	307.06	187.44
251.619	209.35	192.03	185.34	179.61	187.87	251.619	206.93	226.6	290.75	192.14	251.618	251.67	221.04	225.05	228.61	244.46	251.62	227.87	247.18	306.95	187.66
252.271	209.35	191.57	185.3	179.24	187.39	252.269	209.55	224.91	291.07	192.19	252.268	252.09	221.36	224.97	228.62	237.89	252.269	227.88	246.97	306.94	187.62
252.919	209.71	191.87	185.43	179.37	188.01	252.92	204.95	224.37	290.71	192.52	252.918	252.16	221.27	225.26	228.83	235.28	252.919	227.99	247.23	307	187.66
253.571	209.53	191.26	185.05	179.32	187.82	253.57	201.87	224.34	291.07	192.52	253.569	251.93	221.12	224.74	228.64	234.41	253.569	228.19	246.99	307.09	187.75
254.219	210.04	191.6	185.25	178.86	187.62	254.22	200.38	224	291.13	192.59	254.219	253.02	221.42	224.93	228.51	234.7	254.221	228.33	247.11	306.84	187.95
254.87	210.22	191.61	185.43	179.1	187.71	254.87	199.7	224.27	290.81	192.36	254.869	255.5	221.22	224.85	228.66	234.14	254.869	228.15	247.35	307.17	188.05
255.52	209.85	191.45	185.26	179.03	188.13	255.518	199.8	223.77	290.95	192.3	255.518	255.31	221.43	225.03	228.56	233.73	255.52	228.29	247.12	307.06	187.75
256.169	209.88	191.61	185.2	179.12	187.72	256.17	199.32	224.33	291.12	192.07	256.169	253.06	221.52	225	233.69	234.07	256.168	227.8	247.36	307.13	187.99
256.82	210.16	191.13	185.4	178.76	187.89	256.82	199.73	224.29	291.14	192.41	256.819	253.4	221.61	224.98	249.31	233.65	256.82	228.06	247.24	306.97	187.64
257.469	210.14	191.08	185.46	178.9	187.81	257.468	199.67	224.22	291.05	192.59	257.471	252.4	221.54	225.03	249.87	233.69	257.469	228.14	247.21	307.16	187.8
258.119	210.09	191.94	185.37	178.94	187.65	258.118	199.7	224.24	291.12	192.56	258.119	251.55	221.55	225.11	243.04	233.86	258.12	228.04	263.67	306.85	187.95
258.769	210.25	191.51	185.96	178.92	187.95	258.77	200.08	223.97	291.08	192.71	258.769	251.26	221.87	225.37	234.95	233.8	258.768	228.12	268.5	306.66	187.65
259.419	210.21	191.36	185.56	179.08	187.76	259.418	199.61	223.92	291.03	192.56	259.42	251.01	221.39	225.34	231.56	233.18	259.419	228.4	264.19	307.06	187.87
260.069	210.48	191.69	185.4	179.48	187.8	260.07	199.84	224.35	291.09	192.05	260.07	251.51	221.81	225.06	230.2	233.44	260.069	228.07	255.37	306.93	187.61
260.72	210.81	192.08	185.58	179.15	188.16	260.72	199.7	224.24	291.09	192.62	260.72	251.28	221.45	225.55	229.5	233.28	260.719	228.17	250.85	307.55	187.76
261.37	210.85	191.99	185.7	179.14	187.69	261.369	199.58	224.47	291.24	192.23	261.371	251.02	221.61	225.42	228.98	233.39	261.37	228.31	249	307.01	187.82
262.02	211	191.64	185.44	179.1	187.86	262.019	199.54	224.38	291.21	192.78	262.019	251.68	221.54	225.38	229.01	233.73	262.02	228.3	248.21	307.06	187.8
262.669	210.4	191.96	185.43	178.93	187.89	262.665	199.83	224.63	291.19	192.37	262.671	251.63	221.74	225.38	229.21	233.57	262.668	228.46	248.58	307.16	188.08
263.319	210.86	192.02	185.67	178.93	187.75	263.319	199.55	224.39	291.11	192.5	263.319	251.03	221.23	224.78	228.73	233.34	263.32	228.05	247.28	306.99	187.62
263.969	210.82	192.13	186.12	178.99	187.64	263.97	199.98	230.45	290.95	192.45	263.97	251.5	221.57	225.04	228.95	233.37	263.97	228.41	247.21	306.95	188.14
264.619	210.9	191.81	185.73	179.18	187.89	264.62	199.72	237.15	291	192.39	264.619	251.76	221.83	225.1	229.56	233.53	264.619	228.12	247.28	306.94	187.83
265.269	211.14	191.96	191.23	178.61	187.72	265.27	199.71	235.03	291.29	192.44	265.27	251.89	221.96	224.98	228.82	233.47	265.269	228.43	247.31	306.64	187.83
265.919	210.95	192.62	193.67	178.82	187.78	265.919	199.72	228.7	291.13	192.08	265.92	251.81	221.96	225.6	228.95	233.27	265.92	228.37	247.35	306.97	187.76
266.569	211.36	192.68	191.54	178.82	187.79	266.569	199.66	226.1	291.49	192.51	266.571	251.83	222	225.39	228.82	233.72	266.569	228.46	247.25	307.14	187.66
267.219	211.2	192.11	186.49	178.93	187.93	267.219	200.07	225.11	291.22	192.34	267.219	252.4	222.42	225.09	229.13	233.66	267.22	228.45	246.97	307.14	187.84
267.87	211.57	192.57	183.61	178.71	187.56	267.869	199.89	224.63	291.44	192.59	267.871	251.88	226.34	225.4	228.64	233.46	267.87	228.32	246.99	306.98	187.93
268.518	211.69	193.28	183.47	179.06	187.94	268.519	199.64	224.63	291.54	192.49	268.52	252.42	227.09	224.94	228.36	233.42	268.52	228.29	246.7	306.46	187.73
269.169	213.47	195.05	183.25	178.74	187.73	269.169	200.11	224.73	291.39	194.25	269.171	252.74	224.05	225.43	228.36	232.78	269.168	227.98	247.3	306.48	187.45
269.819	215.47	193.93	183.23	178.89	187.81	269.819	200.03	224.61	291.65	200.31	269.819	252.57	221.6	229.47	228.55	233.08	269.819	228.63	246.58	307.1	188.18
270.469	214.15	191.94	183.63	178.98	187.79	270.469	200.14	224.82	291.8	201.65	270.469	252.59	220.66	233.79	228.99	233.1	270.469	228.28	246.99	306.96	188.02
271.118	210.4	192.6	183.66	178.68	188.03	271.119	200.26	224.67	291.8	198.83	271.119	252.6	220.12	231.34	228.81	233.03	271.119	228.85	246.97	307.28	188.14
271.769	209.56	192.48	183.59	179.04	187.85	271.769	200.49	224.5	291.81	196.53	271.77	253.11	220.25	227.95	228.82	233.03	271.769	228.38	247.5	307.56	187.32
272.419	209.07	192.5	183.36	178.83	187.77	272.419	200.47	224.22	291.78	195.09	272.42	252.83	220.67	225.12	228.45	233.5	272.419	228.41	247.14	307.11	187.77
273.069	208.98	192.25	183.14	178.92	187.51	273.068	200.19	224.61	291.61	194.37	273.07	253.17	220.46	223.82	228.9	232.88	273.069	228.74	246.61	307.34	188.01
273.719	208.68	192.84	183.34	178.62	187.84	273.715	200.26	224.77	292.03	194.27	273.719	253.15	220.85	223.75	228.52	233.23	273.719	228.61	247.04	307.14	188.24
274.368	208.85	192.39	183.67	179.21	187.66	274.369	200.56	224.59	291.91	193.95	274.369	252.88	220.84	223.09	228.62	233.25	274.369	228.45	247.17	307.13	187.9
275.018	208.8	191.82	183.66	189.24	187.91	275.02	200.5	224.74	291.95	193.38	275.019	253.01	221.11	223	228.92	232.98	275.02	228.64	246.57	307.21	188.43
275.668	209.24	192.01	183.35	196.3	188.34	275.67	200.57	224.98	291.69	193.47	275.67	253.5	220.21	223.77	228.72	232.97	275.668	228.32	246.46	307.16	187.99
276.32	209.36	191.57	183.47	193.09	187.67	276.318	203.93	224.89	292.08	193.41	276.32	253.43	220.81	223.74	228.8	233.09	276.32	228.71	246.89	306.92	187.92
276.97	209.36	191.61	184.14	186.37	188.07	276.97	209.54	224.79	292.2	193.54	276.97	253.31	220.79	223.14	229.27	233.34	276.969	228.31	246.95	307.12	187.68
277.618	209.42	191.67	183.78	182.62	187.97	277.618	207.78	224.54	291.91	193.58	277.62	254.35	220.74	223.57	228.36	232.88	277.62	228.47	246.76	306.7	187.73
278.268	209.43	191.41	183.51	180.34	188.07	278.27	203.91	224.75	292.03	193.77	278.269	257	220.99	224.12	228.14	232.98	278.268	229.05	246.99	306.97	187.87
278.918	209.58	191.49	183.54	179.95	187.67	278.918	201.82	225.17	292.24	193.58	278.919	255.55	221.22	223.94	228.91	233.13	278.92	228.8	247.34	306.91	187.59
279.57	209.58	191.67	183.97	179.25	187.85	279.569	200.42	225.13	292.08	193.52	279.569	253.08	221.42	223.94	228.79	233.35	279.568	228.38	246.18	306.72	188.06
280.22	209.85	191.64	184.4	179.08	187.85	280.22	200.7	225.01	291.95	193.61	280.219	252.59	220.93	224.51	228.93	233.18	280.218	228.55	247.09	306.89	188.13
280.869	209.88	191.55	184.25	179.37	188.03	280.869	200.56	225.3	292.11	193.69	280.87	251.97	221.42	223.68	229.03	232.46	280.869	228.66	247.3	307.15	187.92
281.52	210.11	192.02	184.21	179.06	188.14	281.52	200.2	225.19	292.06	193.69	281.518	251.42	221.26	224.13	228.77	233.22	281.519	228.73	246.92	306.92	187.99
282.17	209.93	191.54	184.15	178.54	187.86	282.169	200.34	224.77	292.05	193.8	282.17	251.03	221.76	224.13	228.78	232.74	282.169	228.99	246.78	307.41	188.07
282.818	210.04	191.73	184.29	179.08	187.87	282.819	200.15	225.08	291.84	193.75	282.819	251.19	221.25	224.55	228.35	240.95	282.819	228.94	247.19	306.99	195.22
283.47	210.55	191.28	184.72	178.84	187.73	283.47	200.21	225.28	291.58	193.92	283.469	251.11	221.61	224.23	228.85	252.08	283.469	229.14	246.78	307.11	198.9
284.119	210.4	191.57	184.5	179.14	187.68	284.119	200.12	225.15	291.83	193.73	284.118	251.08	221.13	224.69	228.65	251.77	284.118	228.51	247	307.43	196.93
284.769	210.54	192.08	185.07	178.86	188.19	284.771	199.88	225.36	292.22	193.55	284.77	251.2	221.37	224.19	228.68	243.16	284.768	228.56	247.16	307.22	192.23
285.419	210.63	192.02	184.64	178.8	187.66	285.419	200.23	225.73	291.73	193.73	285.42	251.46	221.45	224.39	229	237.34	285.418	228.38	247.08	307.42	190.81
286.07	210.32	191.46	184.8	178.83	187.81	286.071	200.53	225.46	291.97	193.43	286.07	251.38	220.89	231.46	228.92	235.3	286.068	229.11	246.81	307.29	190.47
286.718	210.55	192.27	191.64	179.07	187.64	286.72	200.36	225.97	291.61	193.5	286.719	251.42	221.15	233.44	228.64	234.42	286.719	228.51	246.8	307.14	190
287.37	210.52	192.45	193.53	178.67	187.55	287.37	199.99	225.77	291.96	193.1	287.37	251.32	221.63	230.09	228.95	234.07	287.369	228.6	246.96	307.17	189.99
288.018	210.89	192.04	190.38	178.88	187.93	288.02	200.14	225.45	291.52	193.39	288.019	251.46	221.21	225.85	228.84	233.92	288.019	228.66	247.1	307.15	189.84
288.669	210.73	192.33	185.3	178.78	187.92	288.67	200.09	225.69	291.52	193.17	288.67	252.05	222.12	225.01	229.33	233.84	288.668	228.55	246.57	307.09	188.87
289.319	211.32	192.8	183.8	179.01	188.14	289.319	199.8	225.35	291.88	193.26	289.32	252.38	226.4	223.98	228.82	233.4	289.318	228.33	247.06	307.36	189.24
289.969	210.86	192.65	183.35	178.8	187.97	289.969	199.94	225.37	291.62	193.33	289.969	252.43	225.91	223.5	228.31	233.93	289.968	228.36	246.99	307.01	188.76
290.618	211.07	192.1	182.88	179.08	187.77	290.619	199.92	225.17	291.46	193.24	290.619	252.4	223.24	223.45	227.94	233.54	290.618	229.05	247.01	307.41	189.36
291.269	210.97	191.86	183.42	178.98	187.98	291.27	200.09	225.47	291.76	193.14	291.269	252.47	221.93	223.55	228.47	233.32	291.268	228.6	246.99	323.3	188.59
291.919	211.14	192.5	183.28	178.85	187.85	291.92	199.95	225.21	291.71	192.94	291.919	252.45	221.02	223.33	228.6	233.68	291.919	228.39	247.18	337.16	188.75
292.57	211.12	193.66	183.41	178.8	187.93	292.57	199.99	225.47	291.59	193.38	292.569	252.5	220.33	223.45	228.22	233.4	292.567	228.42	247.02	335.68	188.55
293.219	211.38	194.66	183.81	178.56	187.81	293.22	203.56	225.43	291.82	193.21	293.219	252.48	220	223.59	228.89	233.31	293.218	228.81	246.77	326.27	188.83
293.87	213.15	194.86	183.68	182.38	187.98	293.869	208.98	225.66	291.7	192.97	293.868	252.54	220.12	223.38	228.62	232.97	293.868	228.71	246.93	318.71	187.92
294.52	215.05	192.84	183.49	194.22	188.07	294.519	206.76	225.4	291.9	193.07	294.519	252.81	219.84	223.84	228.2	233.25	294.518	228.82	246.92	314.37	188.58
295.168	213.2	191.3	183.54	195.06	194.75	295.165	202.74	225.23	291.74	192.79	295.169	253.06	220.08	223.88	228.69	233.1	295.168	229.65	246.9	312.48	188.43
295.819	210.44	192.17	183.39	188.97	206.92	295.82	200.75	225.43	291.71	192.77	295.819	252.97	220	223.83	228.6	233.23	295.818	235.88	247.05	311.58	188.33
296.468	209.64	192.22	183.45	183.19	208.4	296.469	200.24	225.3	291.55	192.67	296.468	253.38	220.13	223.98	228.4	232.97	296.469	234.76	246.94	310.56	188.33
297.118	208.66	192.84	183.63	181.29	205.28	297.119	200.33	225.21	291.63	192.57	297.121	253.26	220.18	224.02	228.85	233.21	297.119	230.1	246.69	309.7	188.31
297.768	208.57	192.14	183.33	179.75	197.32	297.77	200.31	225.25	291.48	192.48	297.768	253.16	220.08	223.82	228.74	233.09	297.767	228.46	246.6	309.13	188.13
298.418	208.75	192.03	183.38	179.38	193.32	298.419	200.02	225.49	301.88	192.76	298.42	253.4	219.81	223.99	228.2	233.14	298.419	227.51	246.79	308.9	190.35
299.069	208.66	191.86	183.89	179.81	191.07	299.069	200.23	225.25	313.75	192.92	299.069	253.02	220.32	224.26	228.18	233.3	299.07	227.41	246.4	308.5	197.19
299.719	208.74	191.81	183.75	179.39	189.77	299.72	200	225.55	312.95	192.27	299.72	253.4	220.32	224.38	227.89	232.95	299.72	227.19	246.8	308.25	197.63
300.369	209.05	191.68	184.16	179.02	189.65	300.369	200.02	225.27	305.71	193.99	300.37	253.34	220.04	224.31	227.81	232.64	300.37	227.03	252.75	308.03	194.28
301.02	208.95	192.06	183.9	179.09	189.64	301.02	199.81	225.49	298.81	199.94	301.018	253.47	220.54	224.17	228.1	233.46	301.018	227.11	267.02	307.87	190.95
301.669	209.16	192.25	184.26	179.6	189.35	301.67	200.01	225.45	296.17	200.87	301.669	253.67	220.57	224.61	228.13	232.95	301.67	226.86	266.56	307.83	192.43
302.32	209.47	191.69	183.98	179.14	189.3	302.319	200	225.62	294.64	197.24	302.319	253.41	220.47	224.23	228.52	232.72	302.32	227.26	258.14	307.43	194.12
302.968	209.58	191.67	183.98	179.05	188.81	302.971	199.82	225.53	293.96	195.16	302.969	253.2	220.72	224.41	228.6	232.66	302.97	227.36	251.88	307.72	191.84
303.62	209.59	191.93	184.56	178.95	188.55	303.619	199.74	225.32	293.24	194.5	303.619	253.52	220.45	224.5	228.32	233.07	303.62	227.26	248.43	307.64	190.83
304.27	209.29	191.76	184.59	179.23	188.52	304.269	199.79	225.37	292.33	193.82	304.269	253.52	220.65	228.04	228.85	233.38	304.269	227.13	247.74	307.42	190.79
304.921	210.39	191.58	184.25	179.1	188.42	304.919	199.91	225.25	292.35	193.56	304.919	253.68	221.16	233.12	228.54	232.96	304.919	227.42	247.53	307.2	190.23
305.569	210.3	191.52	184.47	179.12	188.57	305.57	199.62	225.02	292.13	193.43	305.569	253.6	220.63	231.52	228.11	233.07	305.569	227.59	247.03	307.05	189.87
306.219	210.43	192.06	184.45	179.12	188.26	306.22	200.29	225.59	291.81	193.28	306.219	253.72	220.4	228.03	228.23	233.02	306.218	227.41	246.89	307.22	189.32
306.869	210.23	191.44	184.74	179.13	188.44	306.87	199.83	225.08	291.68	193.2	306.87	257.12	220.51	225	228.49	233.17	306.87	227.55	246.51	307.01	189.22
307.519	210.35	191.37	184.69	179.26	188.42	307.52	201.29	225.4	291.33	193.19	307.52	256.34	220.88	224.4	228.39	233.36	307.52	227.31	246.93	307.13	189.27
308.169	210.45	191.66	184.47	178.82	188.09	308.17	207.15	225.57	291.47	192.82	308.17	253.53	220.96	223.95	228.3	232.85	308.17	227.45	246.55	307.07	189.19
308.819	210.17	192.06	185.27	178.99	188.22	308.82	207.86	225.39	291.35	193.4	308.82	253.24	220.44	223.62	228.35	233.33	308.82	228	246.94	307.15	188.96
309.469	210.58	191.84	185.24	179.4	188.13	309.47	203.65	225.24	291.03	193.14	309.466	252.4	220.42	223.4	227.72	233.01	309.47	227.99	246.83	306.84	189.15
310.119	210.57	192.38	185.05	179.05	188.12	310.12	201.29	225.36	290.91	193.27	310.114	251.62	220.72	223.41	228.49	232.93	310.12	228.03	246.4	306.9	189.26
310.769	210.74	192.01	185.21	178.96	188.27	310.769	200.19	224.98	290.58	193.04	310.769	251.47	221.05	223.37	228.28	232.91	310.77	227.82	246.43	306.92	188.77
311.419	210.88	192.33	185.45	178.95	187.83	311.42	199.99	225.15	290.75	192.95	311.419	250.88	220.97	222.92	232.11	232.85	311.419	228.3	246.16	307.01	189.01
312.071	210.72	192.38	185.33	179.28	187.88	312.068	200.05	224.88	290.75	193	312.065	251.45	221.16	223.39	248.61	232.67	312.069	228.08	246.21	306.89	188.76
312.719	210.56	192.07	185.22	179.09	187.83	312.72	200.04	225.35	290.8	193.08	312.72	250.97	220.8	223.81	250.34	232.91	312.719	228.33	246.65	307.17	188.71
313.369	210.38	192.62	185.4	178.93	187.76	313.368	199.71	225.42	290.66	193.13	313.369	251.2	221.17	223.64	243.57	232.43	313.369	228.04	246.81	306.98	188.76
314.019	210.62	192.76	185.58	178.5	187.81	314.02	200.12	224.93	290.64	192.83	314.016	251.07	220.79	223.53	235.35	232.62	314.019	228.2	246.43	307.55	188.27
314.669	210.98	194.03	184.95	178.88	187.64	314.669	199.89	225.2	290.56	192.44	314.664	250.95	221.51	223.59	230.91	232.04	314.669	228.21	246.14	306.95	188.7
315.319	210.93	194.7	188.08	179.12	187.52	315.319	200.11	225.21	290.49	192.8	315.321	251.69	225.97	223.89	229.47	232.72	315.319	227.84	246.6	306.76	188.38
315.971	210.82	192.63	192.41	178.86	187.43	315.969	199.95	225.08	290.61	192.74	315.965	251.84	225.82	223.95	228.88	232.85	315.969	227.97	246.24	307.07	188.15
316.619	210.91	191.05	191.55	178.9	187.58	316.619	199.74	224.87	290.39	192.57	316.617	251.46	222.6	224.26	228.32	233.02	316.619	228.13	246.87	306.69	194.53
317.269	211.03	191.38	186.64	178.92	187.54	317.269	199.72	225.08	290.37	192.67	317.267	251.94	221.46	224.25	228.01	232.59	317.27	228.12	246.64	306.7	199.25
317.919	211.02	191.83	185.09	179.22	187.51	317.921	199.78	224.96	290.16	192.9	317.92	252.04	219.95	224.19	228.27	232.74	317.919	228.23	246.61	307.26	196.47
318.569	211.37	191.93	184.82	178.92	187.76	318.569	199.56	224.82	290.33	192.43	318.566	252.01	219.83	224.72	228.31	232.58	318.569	228.2	246.29	307.17	193.2
319.219	211.16	191.74	184.5	178.92	187.52	319.22	199.83	225.15	290.18	192.45	319.216	252.11	219.87	224.35	228.4	232.31	319.219	228.45	246.94	306.84	191.28
319.869	211.42	192.04	184.37	178.82	187.87	319.87	199.72	224.98	289.73	192.03	319.87	252.26	220.06	224.42	228.26	232.69	319.869	228.2	246.64	306.83	190.43
320.521	211.43	192.4	184.32	178.95	187.64	320.518	199.19	224.63	290.01	192.28	320.522	253.1	220.16	224.8	228.69	232.95	320.52	228.47	246.6	307.04	190.08
321.169	211.81	192.11	184.4	178.74	187.73	321.17	199.32	224.72	289.99	192.38	321.17	252.61	219.68	224.18	227.96	232.34	321.17	228.5	246.59	306.81	189.96
321.82	214.95	192.16	184.24	179.17	187.71	321.82	199.62	224.76	289.7	192.2	321.816	254.22	220.25	224.55	228.13	232.77	321.818	228.32	246.52	307.01	189.53
322.469	214.77	192.19	184.76	178.67	187.83	322.468	199.63	225.03	289.99	192.04	322.471	255.95	220.1	224.42	227.93	232.4	322.469	228.83	246.29	306.61	189.72
323.12	211.13	192.47	184.5	178.93	187.78	323.12	199.44	224.95	290.03	192.48	323.117	254.25	219.73	224.19	227.83	232.5	323.118	228.33	246.57	306.63	189.48
323.769	209.74	191.73	184.63	178.93	187.7	323.77	199.72	225.18	290.01	192.08	323.765	253.21	220.44	224.72	228.13	232.42	323.77	228.22	246.49	306.77	189.36
324.421	209.33	191.95	187.93	178.71	187.56	324.419	199.7	225.57	289.9	192.26	324.416	252.99	220.19	224.43	228.16	232.51	324.418	228.61	246.51	306.88	189.25
325.07	209.57	191.74	191.47	178.75	187.65	325.07	199.41	235.55	289.93	192.1	325.07	251.35	220.35	224.96	228.25	244.92	325.07	228.57	246.29	306.72	189.2
325.721	209.41	191.94	189.26	179.07	187.86	325.72	199.53	237.4	289.58	192.36	325.715	250.63	220.53	224.56	228.02	253.8	325.718	228.37	246.47	306.92	189.14
326.369	209.28	192.02	186.45	179.36	187.86	326.37	199.4	232.88	289.74	192.2	326.367	250.33	219.98	224.87	228.04	249.25	326.37	228.83	246.43	306.73	189.04
327.021	209.16	192.5	185.07	178.65	187.8	327.02	199.19	226.8	289.69	192.13	327.015	250.5	220.27	224.85	228.34	240.88	327.018	228.6	246.48	306.8	188.84
327.67	209.62	192.1	185.04	179.61	188.05	327.666	199.09	225.11	290.13	191.87	327.671	250.7	220.09	224.79	228.21	236.39	327.669	228.65	246.1	306.64	188.6
328.32	209.78	192.01	184.65	179.25	187.55	328.318	199.65	224.16	289.88	192.34	328.316	250.9	220.44	224.71	228.06	235.02	328.319	228.69	246.58	306.38	188.67
328.97	209.28	192.07	184.55	179.24	187.78	328.969	199.31	224.01	289.72	192.07	328.966	250.87	220.32	224.81	228.57	234.13	328.969	228.6	246.53	306.75	188.06
329.62	209.62	192.14	184.39	179.19	187.76	329.619	199.71	223.67	289.99	192.22	329.616	250.79	220.91	224.92	227.98	233.61	329.619	228.46	246.59	306.36	188.24
330.27	210.07	192.32	184.55	179.18	187.83	330.269	199.28	223.45	289.81	191.72	330.266	251.36	219.89	225.17	228.16	233.64	330.269	228.72	246.18	306.67	188.42
330.919	209.65	192.45	184.24	178.9	187.76	330.92	199.13	223.58	289.56	191.8	330.92	251.12	220.4	225.15	228.62	234.18	330.919	228.38	246.05	306.28	187.91
331.57	209.59	193.52	184.25	178.93	188.15	331.57	199.29	223.73	289.74	191.82	331.57	251.03	220.36	224.76	228.09	233.48	331.569	228.5	246.41	306.7	188.01
332.219	209.94	195.08	184.75	179.12	187.96	332.22	199.4	223.36	289.55	191.85	332.22	251.35	220.1	225.03	228.45	233.36	332.219	228.68	246.31	306.43	188.33
332.869	209.74	192.98	189.85	178.95	187.77	332.869	199.4	223.74	289.74	192.15	332.864	251.59	220.33	225.03	227.98	233.39	332.868	228.87	246.48	306.74	188.69
333.519	210.07	192.28	192.49	179.06	187.79	333.519	199.44	223.67	289.8	191.74	333.517	251.44	220.52	224.85	228.12	233.57	333.518	228.91	246.86	306.8	188.59
334.17	210.36	191.92	189.41	178.97	187.38	334.17	199.32	223.47	289.64	191.73	334.165	251.64	220.65	225.27	228.29	233.65	334.168	228.65	246.17	306.63	188.26
334.819	210.21	192.15	185.23	179.13	187.69	334.82	199.34	223.62	289.66	192	334.817	251.59	220.52	224.76	228.14	233.68	334.818	228.77	246.75	306.68	188.48
335.469	210.56	191.75	184.12	178.83	187.86	335.47	199.78	223.8	289.34	191.88	335.471	251.83	220.47	225.05	228.16	232.94	335.468	229.14	246.6	306.95	187.98
336.12	213.39	192.07	183.82	178.72	187.5	336.121	199.33	223.66	289.58	192	336.115	251.85	220.55	224.85	228.26	233.6	336.118	228.73	246.47	307.36	188.53
336.769	213.6	192.4	183.36	178.54	187.6	336.77	199.61	223.71	289.61	191.5	336.766	252.47	220.62	224.75	227.93	233.5	336.768	228.95	246.81	307.09	188.06
337.419	210.71	192.49	183.68	179.02	187.91	337.42	199.24	223.81	289.4	191.69	337.419	252.2	221.08	225.18	228.23	233.01	337.418	228.91	246.71	306.88	188.22
338.069	210.04	192.49	183.76	178.82	187.9	338.071	199.41	223.71	289.73	191.89	338.069	252.12	221.5	225.21	227.98	233.32	338.068	229.15	246.75	306.89	187.94
338.719	209.16	191.74	183.94	179.23	187.71	338.72	199.26	223.73	289.49	191.45	338.719	252.46	221.32	225.35	227.98	232.82	338.719	228.99	246.54	307.2	188.26
339.369	208.93	191.4	183.91	178.91	187.85	339.371	199.42	223.6	289.41	191.64	339.369	252.56	221.42	224.55	228.18	233.22	339.369	228.77	246.46	306.95	187.96
340.019	209.03	192.06	183.95	179.43	187.46	340.018	199.34	223.7	289.39	191.6	340.019	252.75	220.99	224.98	228.14	232.83	340.019	228.4	246.39	306.89	187.87
340.669	209.3	191.98	183.99	179.05	187.65	340.671	199.52	223.87	289.57	191.59	340.669	253.14	221.67	224.98	228.2	232.86	340.669	228.48	246.26	306.97	188.12
341.319	209.12	191.76	184.22	179.16	187.59	341.319	199.26	223.41	289.46	191.44	341.319	255.52	221.03	225.18	228.28	232.48	341.319	232.51	246.19	307.25	187.88
341.969	209.23	192.5	184.12	179	187.83	341.971	199.16	223.41	289.45	191.61	341.969	256.12	221.5	225.11	228.39	232.85	341.969	235.73	246.24	306.99	187.59
342.619	209.28	192.03	184.78	179.01	187.62	342.62	199.34	223.75	289.46	191.42	342.62	253.96	221	225.47	228.16	233.18	342.619	232.95	261.79	307.24	188.07
343.268	209.33	192.13	185	179.1	187.83	343.27	199.33	223.62	289.6	191.5	343.27	253.54	221.47	225.13	227.94	233.02	343.268	229.35	268.74	308.68	187.98
343.92	209.39	192.08	187.79	179.17	187.87	343.918	199.58	223.21	289.73	191.74	343.918	252.91	220.96	225.39	228.26	233.01	343.917	227.76	263.97	330.88	187.95
344.568	209.6	191.8	192.7	179.04	187.6	344.571	199.38	223.75	289.4	191.51	344.57	251.19	221.26	226.09	228.02	232.82	344.568	227.99	254.99	337.95	188.32
345.22	209.6	192.09	192.99	188.18	187.59	345.219	199.24	224.02	289.32	191.66	345.219	251.11	221.25	233.54	227.83	233.32	345.218	227.16	249.8	331.23	187.63
345.868	209.59	191.89	188.04	196.65	187.7	345.871	199.78	223.94	289.48	191.89	345.865	251	221.33	233.3	228.1	232.86	345.868	227.36	248.54	320.95	187.63
346.52	209.79	191.88	184.65	194.07	187.6	346.519	198.95	223.6	289.37	191.63	346.519	250.93	221.23	229.61	227.74	232.78	346.518	227.23	247.92	315.3	187.89
347.168	210.2	191.7	183.55	187.36	187.8	347.171	199.53	223.46	289.17	195.37	347.169	250.97	221.21	225.72	228.25	233.06	347.168	227.21	247.23	313.03	187.79
347.82	209.95	191.87	183.02	182.98	187.93	347.819	199.11	223.82	289.48	199.48	347.818	250.75	221.87	224.15	227.89	232.85	347.818	227.26	246.99	311.31	187.44
348.468	210.17	192.28	183.11	181.04	187.72	348.471	202.39	223.29	289.42	198.47	348.469	250.73	221.03	223.92	227.68	232.58	348.47	227.46	246.67	310.23	187.74
349.118	212.33	192.11	183.17	180.46	187.9	349.119	208.76	223.82	289.67	195.46	349.119	250.91	221.18	223.8	227.96	232.65	349.117	227.31	246.47	309.7	187.54
349.769	213.48	192.15	183.63	179.73	187.48	349.769	207.67	223.44	289.35	193.89	349.77	251.03	221.25	223.37	227.73	233.34	349.769	227.4	246.61	308.89	187.56
350.419	210.99	192.21	183.69	179.2	187.56	350.419	202.91	223.74	289.6	193.02	350.418	250.91	221.61	223.2	228.29	233.05	350.419	227.44	246.74	309.12	187.58
351.069	210.33	192.52	183.92	179.17	187.71	351.069	199.92	223.77	289.67	192.47	351.069	251.23	221.68	222.88	227.85	232.3	351.069	227.57	246.48	308.69	187.93
351.719	209.11	192.15	184.28	179	187.47	351.72	199.05	223.93	289.45	191.99	351.719	251.64	221.86	223.18	232.97	232.76	351.72	227.62	246.71	308.61	187.52
352.369	208.91	192.42	184.08	179.17	187.82	352.37	198.4	223.58	289.27	191.9	352.369	251.37	221.4	223.64	248.82	232.89	352.37	227.64	246.9	308.12	188.13
353.019	208.87	192.26	183.6	178.86	187.49	353.021	198.68	223.53	289.13	192.1	353.019	251.69	221.74	223.48	250.21	232.48	353.019	227.55	246.93	308.29	187.66
353.669	208.99	192.36	184.09	178.73	187.67	353.671	198.42	223.51	289.4	191.96	353.669	251.47	221.47	223.47	243.82	232.06	353.669	228.23	246.46	308.19	188.03
354.318	209	192.83	184.03	178.94	187.69	354.319	198.51	223.89	289.33	191.99	354.319	251.45	221.6	223.88	234.98	232.32	354.32	227.92	246.66	308.13	187.59
354.969	208.75	192.18	184.31	178.71	187.44	354.969	198.8	223.77	289.47	191.86	354.969	251.69	221.16	223.78	230.76	232.43	354.969	227.59	246.54	307.78	187.73
355.619	209.42	192.35	184.46	188.34	187.82	355.619	198.53	223.85	289.19	191.9	355.619	251.76	221.35	223.79	229.06	232.53	355.62	227.97	246.61	307.81	187.51
356.269	209.22	192.73	183.9	193.85	187.7	356.269	198.38	223.96	289.58	191.43	356.269	251.99	221.08	223.76	228.05	232.18	356.269	227.98	246.36	307.79	188.06
356.919	209.17	192.48	184.07	189.91	187.38	356.921	198.37	223.9	289.22	191.92	356.919	252.07	221.73	223.85	227.88	232.22	356.916	228.05	246.41	307.62	187.61
357.569	209.34	192.1	184.08	184.06	187.67	357.57	198.72	223.66	289.3	194.43	357.569	252.05	221.33	224.42	227.94	232.05	357.571	227.83	246.72	307.47	187.75
358.219	209.19	192.86	184.36	181.2	187.61	358.22	198.32	224.08	289.27	198.6	358.22	252.22	220.75	224.19	228.08	234.3	358.215	228.28	246.85	307.74	187.74
358.87	210.74	192.62	185.31	180.34	187.81	358.87	198.43	223.77	289.09	197.07	358.87	252.25	221.13	224.33	228.24	248.68	358.866	228.23	246.84	307.5	188.1
359.519	212.52	193.01	192.05	180.09	187.79	359.52	198.38	223.67	289.43	194.15	359.518	252.41	221.21	224.25	227.94	252.84	359.521	228.32	246.66	307.38	187.92
360.17	211.91	192.84	193.59	179.45	187.81	360.171	198.28	223.7	288.9	193.17	360.17	252.62	221.28	224.21	227.87	246.1	360.165	228.14	246.77	306.91	188.74
360.819	209.61	192.65	190.17	179.55	187.64	360.82	198.08	223.93	289.5	192.3	360.819	252.85	221.24	224.21	228.09	238.52	360.817	228.71	246.36	307.48	197.2
361.47	209.65	192.76	185.3	179.3	187.74	361.47	198.34	223.75	288.98	192.5	361.469	252.84	221.14	224.51	228.07	235.42	361.471	228.46	246.48	307.68	199.36
362.12	208.9	192.89	183.33	179.52	187.65	362.12	198.34	223.72	289.3	192.19	362.119	253.07	221.1	224.35	228.02	234.02	362.119	228.49	246.86	307.63	196.51
362.77	208.69	193.2	182.87	179.15	187.34	362.77	198.37	223.64	289.28	192.09	362.77	253.24	221.48	224.37	227.77	233.73	362.769	228.71	246.28	307.36	192.52
363.42	208.71	192.77	183.44	179.26	187.71	363.419	198.4	223.86	289.42	192.07	363.42	252.58	220.93	224.22	227.96	233.17	363.419	228.55	246.41	307.29	190.91
364.071	208.7	193.52	183.97	179.14	187.59	364.069	198.04	223.57	289.17	191.73	364.069	252.78	221.5	224.63	228.07	233.2	364.069	228.3	260.41	307.5	190.6
364.721	208.99	193.27	183.79	179.4	187.71	364.719	198.06	223.57	288.98	192.1	364.719	253.06	220.98	224.45	228.44	233.06	364.72	228.38	266.93	307.73	189.87
365.371	208.73	193.41	184.18	179.59	187.4	365.37	198.24	223.86	288.86	191.95	365.369	252.97	221.14	224.63	228.26	233.22	365.369	228.3	262.73	307.24	189.92
366.019	209.04	193.82	183.96	179.45	187.5	366.02	198.01	223.59	289.13	191.46	366.019	252.95	220.64	224.79	228.13	233.31	366.018	228.36	254.05	307.18	189.22
366.67	209.05	193.67	183.99	178.63	187.75	366.67	198.4	223.71	288.92	191.38	366.669	253.07	221.09	224.74	228.42	233.26	366.67	229.63	249.9	307.31	189.32
367.32	209.49	193.37	184	179.05	187.79	367.319	198.11	223.44	288.75	191.61	367.318	253.23	221.26	225.07	228.47	233.02	367.318	234.86	248.23	307.33	188.66
367.971	209.42	193.42	183.81	179.01	187.59	367.971	198.19	223.75	288.81	191.45	367.97	253.4	221.46	225	227.95	233.52	367.97	233.75	247.75	307.19	189.17
368.621	209.65	193.41	184.22	179.4	188.17	368.619	198.3	223.53	288.72	191.71	368.618	253.18	221.47	224.63	227.8	232.99	368.618	229.19	247.18	307.08	188.79
369.271	209.85	193.35	184.27	178.91	187.75	369.271	198.11	223.54	288.7	191.42	369.27	252.97	221.28	224.59	227.73	232.61	369.27	227.92	247.95	308.07	189.07
369.92	209.73	192.51	188.14	179.08	187.38	369.919	198.07	223.34	288.6	191.36	369.919	252.98	221.25	225.11	227.83	233	369.918	228.85	248.86	309.41	189.97
370.57	209.8	192.89	192.42	178.82	187.68	370.571	198.22	223.62	288.93	191.24	370.57	253.39	221.43	224.64	228.24	232.95	370.57	229.19	249.19	309.52	190.94
371.22	209.96	193.43	190.55	178.98	187.61	371.219	198.26	223.49	288.71	191.09	371.22	253.17	221.2	225.11	227.68	232.71	371.218	229.46	249.92	309.66	191.06
371.87	210.31	193.63	186.76	178.59	187.56	371.869	198.2	223.42	288.47	191.46	371.87	252.97	221.55	225.08	227.98	232.47	371.87	229.67	249.97	310.07	191.43
372.52	210.37	193.17	184.22	178.89	187.28	372.519	198	223.6	288.84	190.97	372.519	253.18	221.72	225.01	227.89	232.75	372.52	229.97	249.69	309.93	191.1
373.17	210.75	193.25	183.6	178.32	190.69	373.169	198.25	223.64	288.72	191.26	373.17	253.55	221.51	224.76	227.99	232.33	373.17	229.72	249.7	309.84	191.76
373.82	210.53	193.89	183.87	178.46	205.14	373.819	202.43	223.87	288.56	191.37	373.82	253.7	221	225.64	227.74	232.75	373.82	229.84	249.53	309.62	197.82
374.47	210.47	195.74	183.81	178.3	207.99	374.469	207.58	223.36	288.46	191.37	374.47	253.87	220.99	225.15	227.87	232.22	374.47	229.78	250.22	310.23	200.89
375.119	210.62	193.97	183.93	178.57	205.19	375.119	205.3	223.61	288.86	191.16	375.121	253.86	221.53	225.15	228.21	232.37	375.118	229.59	249.64	309.89	197.86
375.771	210.9	192.35	184.18	177.96	197.7	375.769	201.27	223.58	289.14	191.1	375.769	254	221.2	225.14	227.95	232.68	375.769	229.34	249.77	309.91	194.74
376.419	210.81	191.02	184.29	178.32	193.22	376.419	199.11	223.5	288.98	190.94	376.421	253.9	221.51	225.32	228.16	232.77	376.418	230.01	249.72	309.88	194.09
377.07	210.98	191.18	184.36	178.29	191.08	377.069	198.59	223.64	288.67	190.68	377.069	254.12	221.54	225.45	227.64	233.15	377.069	230.2	249.68	309.81	193.28
377.72	211.14	191.92	184.37	178.58	189.83	377.719	198.01	223.92	288.93	194.98	377.72	253.99	221.53	225.18	228.11	232.38	377.72	230.65	250.15	309.8	193.15
378.371	210.92	192.65	184.36	180.71	189.57	378.37	198.1	227.35	288.64	198.89	378.37	254	221.6	225.03	242.31	232.38	378.369	230.67	249.59	309.8	193.11
379.02	211.08	192.99	184.17	194.32	188.81	379.02	197.68	235.34	288.52	197.24	379.02	253.92	221.44	232.09	250.17	232.54	379.02	230.73	249.77	310.15	193.02
379.67	211.01	192.37	184.31	195.17	188.5	379.67	197.82	235.54	288.39	194	379.67	253.83	221.4	233.84	245.91	232.51	379.67	230.59	249.61	309.97	193.03
380.32	210.9	192.32	184.27	189.53	188.21	380.319	197.91	228.99	288.62	192.77	380.32	254.51	221.72	230.4	236.61	232.56	380.32	230.29	250.18	309.91	192.93
380.97	213.17	191.84	184.45	183.52	188.35	380.969	198.01	224.43	288.6	191.8	380.97	254.38	221.72	226.19	231.48	233.07	380.97	230.56	263.54	309.3	192.54
381.619	214.19	191.88	184.08	181.2	188.16	381.619	197.35	222.86	288.72	191.48	381.62	254.44	222.13	224.87	229.61	232.83	381.62	230.49	268.92	309.94	192.76
382.27	212.13	191.93	184.36	180.19	187.61	382.269	198.06	222.55	288.54	191.05	382.27	254.54	221.81	224.22	229.37	232.6	382.27	230.66	264.6	309.65	192.34
382.92	209.18	192.05	184.47	179.15	187.83	382.918	199.42	222.21	288.68	191.36	382.921	254.39	221.94	223.04	228.29	232.44	382.92	230.61	256.58	310.19	192.16
383.569	208.49	192.13	184.59	179.19	188.17	383.57	204.38	222.45	288.49	191	383.569	254.37	221.4	223.7	229.67	232.59	383.568	230.75	252.34	310.1	192.21
384.219	208.19	191.52	184.43	178.8	187.84	384.215	203.28	222.36	288.64	191.16	384.221	254.4	221.39	223.54	228.52	232.55	384.218	230.41	251.24	310.19	191.93
384.869	208.14	191.44	184.58	179.27	187.61	384.87	200.09	222.39	288.66	191.2	384.869	254.84	221.61	224.08	228.96	232.28	384.87	230.53	250.58	309.85	192.1
385.519	208.78	191.67	184.71	178.84	187.75	385.518	198.18	222.5	288.64	190.78	385.521	254.44	221.63	223.44	228.3	232.6	385.518	230.64	250.3	310.26	191.49
386.169	208.83	191.68	184.33	178.83	187.63	386.17	197.93	222.59	289.11	191.07	386.169	254.4	221.82	223.72	228.49	232.37	386.17	230.57	249.9	309.92	191.11
386.819	208.73	191.63	184.7	178.87	187.31	386.818	197.67	222.52	288.93	191.26	386.819	254.48	222.06	223.88	228.14	232.48	386.818	230.88	250.1	310.1	191.58
387.469	208.47	192	184.8	178.71	187.39	387.466	198.04	222.28	288.97	190.83	387.469	254.3	221.76	223.9	228.57	232.66	387.47	230.54	249.76	310.43	191.62
388.12	208.88	192.52	184.69	178.75	187.76	388.118	197.96	222.09	288.54	190.97	388.119	254.37	221.41	224.27	228.81	232.37	388.118	230.58	249.94	309.91	191.27
388.77	208.92	191.98	184.92	178.73	187.28	388.77	197.79	222.19	288.5	191.05	388.769	254.34	221.55	224.09	228.44	232.79	388.77	231	249.87	309.92	191.31
389.42	208.89	191.89	184.67	178.98	187.16	389.418	197.78	222.43	288.81	190.5	389.419	256.93	221.56	224.03	228.67	232.82	389.419	230.5	249.41	309.97	190.93
390.07	209.4	192.04	184.76	178.61	187.18	390.07	197.78	222.63	288.85	190.52	390.07	258.56	221.36	224.66	228.71	232.22	390.07	230.86	249.57	309.9	191.39
390.719	209.44	191.56	184.53	178.73	187.29	390.718	198.03	222.2	288.74	190.6	390.72	255.52	221.07	224.41	228.1	232.07	390.718	230.69	249.86	310.16	191.08
391.369	209.44	191.84	184.79	178.7	187.05	391.37	197.77	222.52	288.78	190.55	391.37	253.43	221.65	224.49	228.28	232.62	391.369	230.55	249.68	310.51	191.22
392.018	209.89	191.81	184.59	178.85	187.29	392.02	197.64	222.32	288.53	190.61	392.019	253.02	221.68	224.44	228.56	232.14	392.019	230.53	249.57	310.12	191.44
392.669	209.9	192.54	184.92	178.66	186.97	392.669	197.71	222.6	288.29	190.23	392.669	251.99	221.77	224.31	228.82	232.41	392.669	230.47	249.49	310.06	191.24
393.318	210.07	192.34	184.79	178.38	187.27	393.319	197.86	222.33	288.63	190.47	393.319	251.26	221.88	224.63	228.49	232.3	393.319	230.84	249.32	310.32	191.35
393.969	210.22	192.32	184.59	178.87	187.37	393.969	197.74	222.45	288.61	190.84	393.969	250.98	222.03	224.73	228.42	232.35	393.969	230.82	249.73	310.41	190.87
394.619	210.24	192.59	184.76	178.71	187.16	394.619	197.67	222.31	288.61	190.63	394.619	250.89	221.81	224.55	228.14	232.24	394.619	230.31	249.77	310.24	191.15
395.269	210.2	191.88	184.59	179.34	187.16	395.268	197.58	222.57	288.51	190.5	395.269	251.1	221.8	224.23	228.57	232.26	395.269	230.95	249.53	310.12	191.27
395.919	210.56	192.01	185.03	178.34	187.05	395.921	197.64	222.11	288.5	190.57	395.92	251.22	221.88	224.76	228.39	232.51	395.919	230.74	250.03	310.02	190.92
396.569	210.31	192.18	184.79	177.86	187.08	396.569	197.18	222.25	288.49	190.3	396.569	251.29	221.99	225.02	228.2	232.25	396.569	230.83	258.29	309.77	190.83
397.219	210.41	192.55	185.1	178.46	186.85	397.221	197.82	222.52	288.54	190.42	397.221	251.31	221.73	224.54	228.12	232.48	397.218	230.76	269.11	310.25	191.13
397.869	210.55	192.23	184.8	178.44	187.37	397.868	197.7	222.46	288.62	190.24	397.869	251.23	221.83	224.82	227.83	232.5	397.869	231.13	267.25	310.2	191.33
398.519	210.33	192.16	184.95	178.53	187.07	398.521	197.48	222.53	288.58	190.19	398.519	251.35	221.71	225.61	228.28	232.48	398.519	231.19	258.43	310.33	191.01
399.169	210.43	192.05	185.38	178.65	187.16	399.169	197.42	222.45	288.48	190.28	399.169	251.38	222.13	224.75	228.27	232.03	399.169	230.97	253.87	310.54	191.01
399.818	210.88	192.05	192.22	178.19	187.37	399.821	197.33	222.43	288.25	190.3	399.819	251.16	221.93	224.72	228.08	232.37	399.819	230.96	251.8	310.39	191.18
400.47	210.77	192.63	193.99	178.33	187.08	400.469	197.13	222.46	288.61	190.25	400.469	251.42	221.67	225.01	227.55	232.34	400.469	230.93	251.08	310.3	191.17
401.118	210.38	194.66	192.08	178.36	187.21	401.121	197.58	222.49	288.52	190.17	401.119	251.26	221.51	224.56	228.2	232.55	401.119	231.09	250.69	310.56	190.57
401.768	210.55	194.18	188.3	178.55	187.35	401.77	197.56	222.55	288.49	190.03	401.769	251.91	221.4	231.46	228.16	232.24	401.769	231.1	250.97	310.62	190.88
402.418	210.91	191.96	184.53	178.63	186.82	402.42	197.44	222.02	288.2	190.25	402.421	251.99	222.02	232.39	227.71	232.34	402.418	230.92	250.69	310.27	191.06
403.07	211.42	191.52	183.68	178.85	186.92	403.069	197.69	222.54	288.31	190.09	403.069	251.7	221.71	229.16	228.24	232.71	403.068	231.24	250.27	310.48	190.88
403.718	213.93	192.76	183.38	178.53	187.37	403.72	197.67	222.59	288.43	189.75	403.72	251.83	221.08	225.99	227.73	232.17	403.719	231.14	250.61	310.34	190.98
404.37	214.46	192.4	183.65	178.48	187.27	404.37	197.75	222.52	288.7	190.18	404.369	251.73	221.57	224.56	228.21	232.42	404.369	230.97	250.44	310.76	190.8
405.019	210.92	192.92	183.69	189.5	187.04	405.019	197.7	222.34	288.55	190.02	405.02	252.03	221.44	223.92	227.88	232.6	405.019	231.09	250.55	310.76	191.43
405.669	209.62	192.31	183.9	195.69	187.14	405.67	197.85	222.8	288.47	190.14	405.67	252.35	221.95	223.6	228.02	232.43	405.669	231.02	249.87	310.21	191.18
406.319	208.91	192.37	184.27	192.59	186.92	406.32	197.86	222.6	288.55	190.22	406.32	252.18	221.48	223.62	227.87	232.43	406.319	231.24	250.48	310.37	190.91
406.969	209.13	192.71	183.75	186.21	187.32	406.97	197.79	222.53	288.7	190.23	406.969	252.81	221.72	223.41	228.2	232.59	406.969	230.94	250.27	310.04	191.07
407.619	209.05	191.88	184.47	182.51	187.46	407.62	197.88	222.77	288.42	190.26	407.62	252.65	221.79	223.47	227.98	232.4	407.618	234.96	250.18	310.48	190.98
408.27	208.88	191.6	183.9	180.99	187.44	408.27	197.62	222.54	288.39	190.1	408.27	252.85	222.01	223.57	228.11	232.41	408.269	237.75	250.42	310.21	191.1
408.919	209.01	192.04	184.28	180.24	187.28	408.919	197.78	223.06	288.49	190.12	408.92	252.75	222.1	223.43	228.03	232.59	408.919	234.1	250.1	310.03	191.03
409.569	209.26	192.1	184.14	179.44	187.19	409.571	197.75	222.86	288.68	190.23	409.569	252.46	221.49	223.41	228.22	231.93	409.569	231.01	250.04	310.34	190.85
410.219	209.3	192.13	184.38	179.44	187.08	410.215	197.67	222.49	288.62	190.17	410.219	252.63	221.86	223.21	232.62	231.99	410.22	229.83	250.18	310.65	191.13
410.87	209.53	192.29	184.49	179.07	187.51	410.87	197.94	222.36	288.48	190.37	410.87	252.92	221.84	223.6	248.27	245.07	410.869	229.67	250.65	310.31	191.19
411.514	209.65	192.04	184.42	179.04	187.39	411.52	197.6	222.69	288.63	189.98	411.52	252.82	221.52	224.28	249.84	253.44	411.518	229.34	258.21	310.24	199.13
412.17	209.79	191.7	184.36	179.42	187.54	412.17	197.7	222.68	288.69	190.16	412.17	252.92	222.05	223.69	241.63	248.6	412.169	229.42	268.03	310.39	202.12
412.819	209.53	192.13	186.97	179.12	187.5	412.82	197.71	222.93	288.46	190.21	412.82	253.02	222.23	223.6	233.89	239.74	412.82	229.6	266.76	310.08	199.41
413.469	209.62	191.77	192.74	178.69	187.5	413.47	197.85	228.22	288.55	190.56	413.47	253	222.51	224	230.47	235.5	413.47	230.19	260.85	310.65	195.78
414.118	210	191.8	192.8	178.72	187.32	414.12	197.99	235.29	288.81	190.25	414.12	253.18	222.07	224.11	229.06	234.21	414.119	229.96	255.1	310.65	194.54
414.769	210.08	192.17	188.56	178.81	187.73	414.77	197.81	233.73	288.32	190.15	414.77	252.76	221.53	223.92	228.83	233.59	414.769	229.68	252.33	310.44	193.27
415.419	210.21	192.55	185.7	179.1	187.4	415.42	198.01	227.56	288.54	190.6	415.42	252.92	222.03	224.17	228.16	232.94	415.42	229.72	251.56	310.45	193.13
416.069	210.52	192.42	183.83	178.7	187.39	416.069	197.3	223.79	288.67	196.76	416.068	252.83	222.25	224.08	228.35	232.94	416.07	230.05	250.87	310.5	192.87
416.72	210.37	191.97	183.81	178.79	187.49	416.719	197.79	222.18	288.32	199.42	416.72	252.96	221.65	224.45	228.44	233.08	416.72	230.02	251.38	310.58	192.72
417.369	210.5	192.42	183.59	178.53	187.57	417.369	197.89	222.31	288.57	196.34	417.369	253.43	221.51	224.22	228.04	233.05	417.37	229.99	250.78	310.53	193.03
418.02	210.43	192.32	184.25	178.87	187.2	418.021	197.81	222.06	288.47	193.97	418.019	253.08	221.98	224.36	227.8	233.16	418.02	230.25	250.4	310.52	192.47
418.67	210.79	193.77	183.97	178.86	187.72	418.669	197.92	221.86	288.65	192.59	418.669	253.73	221.96	224.41	227.63	233.12	418.67	230.15	250.34	310.13	192.56
419.32	211.18	194.61	184.23	178.24	187.48	419.321	198.17	222.01	288.46	191.99	419.32	257.29	221.8	223.91	227.92	233.49	419.32	229.98	250.14	310.39	192.04
419.971	213.3	192.73	184.44	178.88	187.66	419.966	197.74	222.11	288.51	191.3	419.968	256.18	222.24	224.09	228.02	232.65	419.97	230.34	250.15	310.23	192.09
420.619	214.05	192.25	184.25	178.55	187.31	420.62	197.68	221.87	288.57	190.78	420.619	253.05	222.06	224.24	228.29	232.57	420.62	229.95	250.3	310.7	191.75
421.271	211.77	192.68	184.25	178.77	187.37	421.27	198	221.81	288.69	190.98	421.269	252.79	222.15	224.73	228.08	232.6	421.27	230.5	250.26	310.19	191.57
421.921	209.84	191.14	184.39	178.47	187.58	421.92	197.92	221.97	288.73	190.57	421.92	252.11	221.22	224.87	228.38	232.32	421.921	230.26	250.04	310.03	191.8
422.57	209.65	192.33	184.42	178.28	187.47	422.569	197.36	222.14	288.5	190.87	422.568	251.19	221.68	224.42	228.13	232.34	422.569	230.37	250.28	310.35	191.64
423.22	209.36	192.3	184.52	185.41	187.59	423.221	198.15	221.5	288.46	190.44	423.22	250.26	221.4	224.09	227.83	232.28	423.221	230.3	250.03	310.28	191.31
423.87	209.32	192.27	184.67	195.51	187.81	423.869	197.8	221.57	289.04	190.73	423.87	250.37	221.65	224.43	228	232.2	423.869	230.37	250.34	310.36	191.14
424.52	209.25	192.08	184.36	193.36	187.73	424.519	197.93	221.93	288.6	191.07	424.52	250.93	221.74	224.47	227.66	232.12	424.52	230.39	250.32	310.31	190.91
425.17	209.2	191.8	184.62	187.15	187.52	425.171	198.03	222.17	288.56	190.48	425.17	250.33	221.7	224.67	227.87	231.63	425.169	230.59	249.77	310.02	191.35
425.82	209.28	191.82	184.92	182.82	187.3	425.819	198.07	222.34	288.91	190.55	425.819	251.15	222	224.45	228	232.13	425.821	230.62	250.46	310.23	191.28
426.47	209.39	191.85	184.84	181.34	187.59	426.471	197.96	229.51	288.64	190.22	426.471	251.04	221.59	224.76	227.86	232.48	426.469	230.95	250.53	310.7	191.29
427.12	209.56	191.85	184.55	180.44	188.01	427.119	197.63	234.37	288.43	190.47	427.118	251.14	221.47	224.56	228	232.39	427.119	230.54	250.45	310.55	190.92
427.769	209.68	192.46	185.1	180.21	196.64	427.771	197.71	230.81	288.76	190.43	427.771	250.91	221.8	224.65	228.31	232.62	427.769	230.57	250.28	310.54	190.98
428.42	210.19	192.07	185.01	180.17	207.31	428.418	198.16	225.24	288.8	190.7	428.419	250.74	221.9	224.4	227.93	232.06	428.419	233.99	250.54	310.29	190.87
429.07	210.01	191.85	184.85	179.51	208.02	429.07	197.69	223.16	288.6	190.46	429.069	251.33	223.28	225.17	227.96	232.01	429.069	237.03	250.41	310.4	191.15
429.72	210.23	192.35	185.07	179.66	202.7	429.72	198.02	222.8	288.66	190.48	429.72	251.68	226.71	225.02	228.6	232.53	429.72	233.38	250.23	310.69	190.99
430.37	210.22	192.22	185.14	179.52	195.9	430.37	198.02	222.23	288.7	190.44	430.37	251.53	226.38	224.91	227.92	232.52	430.37	230.96	250.54	310.16	190.8
431.02	210.05	192.57	184.72	179.28	192.46	431.019	198.09	222.12	288.71	190.7	431.02	251.33	223.52	225.03	228.2	232.28	431.02	230.27	250.48	310.54	191.19
431.669	210.67	192.79	185.07	179.21	190.6	431.669	198.28	222.2	288.43	190.5	431.67	252.16	221.71	224.46	228.22	232.32	431.67	229.07	250.19	310.84	190.81
432.321	210.32	192.29	185.11	179.39	189.74	432.32	198.16	222.02	289.09	190.96	432.32	251.49	220.29	225.38	228.2	231.95	432.32	229.05	250.18	310.29	191.12
432.97	210.71	192.08	185.7	179.07	189.5	432.969	198.18	222.1	288.93	190.61	432.97	251.85	220.76	224.93	228.17	232.21	432.97	229.58	249.85	310.45	190.7
433.62	210.75	192.72	185.44	179.19	188.98	433.62	197.7	222.2	288.61	190.5	433.62	251.64	219.87	224.85	228.06	231.62	433.62	229.34	250.19	310.58	190.99
434.269	210.8	193.04	185.66	179.31	188.46	434.27	197.61	222.23	288.2	192.58	434.27	251.86	219.93	224.72	227.89	232	434.27	229.32	250.46	310.45	191.11
434.919	210.9	195.02	185.38	178.98	188.59	434.92	197.78	221.89	288.57	197.55	434.92	251.85	219.81	225.24	227.39	231.96	434.92	229.64	250.22	310.88	190.78
435.569	210.78	193.57	185.22	178.9	188.48	435.568	198.18	222.19	288.88	198.92	435.57	252.07	219.99	224.93	227.97	232.09	435.57	229.72	250.63	310.9	190.6
436.219	211.09	193	185.54	178.6	188.03	436.22	197.91	222.05	288.91	195.52	436.22	252.53	219.96	225.06	227.97	232.15	436.219	229.77	250.51	311.05	194.02
436.869	211.25	193.4	185.11	178.85	188.38	436.87	197.88	222	288.64	193.13	436.87	252.16	220.17	225.16	228.14	232.16	436.869	230.07	250.85	310.51	201.24
437.52	211.11	193.54	185.55	178.53	188.48	437.52	198.15	221.98	288.8	192.16	437.52	252.29	220.32	224.75	227.99	232.29	437.519	229.93	250.24	310.61	201.17
438.17	211.75	194.24	185.71	179.17	188.34	438.17	197.9	222.28	288.78	191.33	438.169	252.52	219.85	225.16	227.82	231.61	438.169	229.89	250.22	310.51	197.68
438.82	211.29	193.46	185.82	178.96	188.09	438.82	198.05	222.08	289.01	191.15	438.82	252.25	220.07	225.05	228.02	231.76	438.819	230.3	250.5	310.93	194.45
439.47	211.35	193.35	185.48	190.63	187.94	439.47	197.84	222.1	288.75	190.84	439.47	252.86	220.11	225	227.91	232.08	439.468	229.66	250.38	311	193.68
440.12	211.65	193.18	185.4	195.37	188.08	440.121	198.16	222.37	288.85	191.41	440.12	252.68	220.63	225.33	238.66	232.08	440.12	230.07	250.32	310.47	192.97
440.77	211.49	193.23	185.66	191.57	187.92	440.769	197.89	221.79	288.71	191.39	440.769	252.56	220.48	224.79	249.61	232.27	440.768	230.06	250.5	311.28	193.25
441.42	211.95	192.79	185.96	184.97	187.89	441.42	197.86	222.28	288.74	190.47	441.419	252.97	220.34	225.22	248.38	232.35	441.42	229.79	250.65	310.96	192.72
442.07	211.98	192.23	185.68	182.21	187.9	442.07	198.03	222.52	288.78	190.78	442.069	252.93	220.61	225.17	240.27	232.06	442.068	230.02	250.73	310.72	192.71
442.72	214.21	192.31	185.71	180.77	187.81	442.72	198	222.53	288.79	190.63	442.72	253.16	220.89	225.42	233.28	232.2	442.72	230.15	250.39	310.55	192.69
443.368	214.57	192.07	186.18	180.12	187.38	443.369	198.01	222.27	289.03	190.33	443.37	252.84	220.1	225.1	229.52	232.05	443.369	230.19	250.67	310.95	192.67
444.02	211.66	192.16	186.05	179.83	187.75	444.021	198.04	231.35	289.08	190.76	444.02	253.07	220.18	225.36	228.92	231.66	444.02	230.32	250.2	310.66	192.14
444.669	209.98	192.32	191.29	179.52	187.42	444.669	198.17	235.03	288.87	190.85	444.671	253.1	220.66	225.29	228.88	231.76	444.668	230.35	250.49	310.38	191.93
445.319	209.85	192.22	194.65	179.51	187.61	445.319	197.85	231.2	289.01	190.72	445.321	253.14	220.53	225.57	228.67	231.91	445.32	230.34	250.66	310.5	191.89
445.969	209.46	192.14	193.26	179.74	187.52	445.969	197.98	225.3	288.85	190.43	445.97	253.43	220.71	225.14	228.51	231.94	445.969	229.99	250.36	310.71	191.79
446.62	209.52	191.88	188.91	179.26	187.32	446.619	197.96	222.98	288.78	190.52	446.621	255.87	220.54	225.05	228.81	232.13	446.619	230.47	250.4	310.78	191.88
447.268	209.69	191.97	184.78	179.38	186.87	447.27	197.94	222.47	289.11	190.45	447.271	257.85	221.34	225.23	228.74	232.33	447.269	230.36	250.13	310.59	191.9
447.92	209.26	192.06	184.07	185.49	186.87	447.92	198.01	222.23	288.71	190.58	447.921	254.16	220.87	225.72	228.77	232.76	447.919	230.58	250.27	310.41	191.8
448.569	209.68	192.54	183.78	192.99	187.15	448.57	198.31	222.47	288.88	190.75	448.571	253.52	220.53	225.84	228.5	232.24	448.569	230.42	250.38	310.66	191.33
449.219	210.01	192.16	183.97	191.02	187.65	449.219	198.14	222.27	289.11	190.7	449.219	252.87	220.61	225.61	228.56	232.42	449.219	230.42	250.83	310.75	191.4
449.869	210.26	192.1	183.95	185.1	187.29	449.869	198.16	222.03	288.89	190.47	449.87	251.2	221.04	225.33	228.45	232.11	449.869	230.39	250.62	310.9	191.49
450.519	209.93	191.76	184.46	182.1	187.14	450.52	197.94	222.16	288.83	190.72	450.519	251.13	220.77	224.8	228.06	231.95	450.518	230.51	250.62	310.81	191.28
451.169	210.44	193.18	184.58	180.61	187.03	451.17	197.92	221.87	288.93	190.17	451.171	251.13	220.98	225.15	228.17	231.9	451.168	230.55	250.27	310.59	191.34
451.819	210.02	193.49	184.06	180.6	187.11	451.82	197.89	222.21	289.04	190.5	451.819	250.83	221.24	225.19	228.67	231.97	451.818	230.35	250.78	310.67	191.38
452.469	210.02	194.5	184.28	180.1	187.19	452.47	198.61	221.82	288.9	190.75	452.47	250.95	221.15	225.4	228.04	232.3	452.468	230.28	249.95	311.3	191.5
453.12	210.4	192.18	184.39	180.05	189.57	453.12	198.2	221.97	289	190.59	453.119	250.9	220.18	225.5	228.54	231.84	453.119	230.5	250.3	310.83	191.43
453.77	210.53	192.37	184.36	180.06	203.3	453.771	198.08	222.06	288.8	190.47	453.771	250.67	221.33	225.16	228.56	231.87	453.769	230.79	250.55	310.96	191.04
454.419	211	191.83	184.45	179.4	207.66	454.421	197.91	222.29	288.99	190.33	454.419	250.93	221.02	225.26	228.27	232.24	454.419	230.63	250.69	310.24	191.68
455.069	210.82	191.78	184.46	179.36	204.24	455.071	198.19	222.12	289.1	190.03	455.071	250.88	221.17	225.54	227.96	231.93	455.071	230.52	250.71	310.96	191.79
455.719	210.57	191.87	184.43	179.17	197.15	455.721	198.23	222.19	289.25	190.52	455.719	251.28	220.69	225.45	227.98	232.3	455.719	230.77	250.78	311.16	191.98
456.369	210.96	191.99	184.17	179.16	192.59	456.369	198.28	222.17	288.76	190.02	456.371	250.47	220.93	225.26	228.35	232.24	456.369	231.02	250.92	311.08	191.6
457.02	210.93	192.31	184.08	179.23	194.77	457.02	198.07	222.13	289.02	190.53	457.019	250.82	221.12	225.62	228.14	231.89	457.018	230.99	250.44	310.83	191.41
457.669	211.68	192.32	184.92	179.01	201.56	457.67	198.22	222.58	289.19	190.43	457.671	251.28	221.26	225.36	228.1	232.17	457.668	230.59	250.94	310.66	191.45
458.319	213.94	191.98	184.13	179.09	203.17	458.32	198.39	222.56	289.22	190.28	458.32	251.4	221.36	225.45	228.11	231.95	458.318	230.66	250.63	310.78	191.46
458.97	213.54	192.36	184.29	178.96	199.51	458.97	198.2	222.22	289.04	190.18	458.971	251.9	221.22	226.04	228.25	232.3	458.969	230.78	250.95	310.62	191.36
459.619	210.96	192.46	184.53	179.28	195.07	459.62	197.95	222.15	289.07	190.1	459.62	251.63	221.45	225.8	228.09	231.88	459.619	230.59	250.76	311.24	191.26
460.269	210.51	192.44	184.44	179.01	193.13	460.27	198.22	222.16	289.13	190.35	460.27	252.2	221.82	225.47	227.87	232.09	460.269	230.61	250.88	310.9	191.46
460.919	209.17	192.07	184.64	178.46	191.87	460.92	198.36	222.46	289.19	189.97	460.92	252.27	221.7	226.02	228.44	231.97	460.919	230.81	251.07	310.63	191.92
461.569	209.04	191.65	184.92	178.71	191.4	461.569	198.36	222.38	289.44	189.92	461.57	252.49	221.63	225.56	228.28	232.21	461.57	230.77	250.92	310.89	191.68
462.219	209.12	192.35	184.64	178.41	191.27	462.221	198.01	230.7	289.32	190.05	462.22	252.47	221.67	225.75	228.68	232.33	462.219	230.8	256.35	310.88	191.76
462.868	208.95	192.27	184.5	178.72	190.51	462.869	198.18	235.06	289.37	190.37	462.87	252.27	220.91	225.88	228.53	232.47	462.869	231.01	270.56	310.92	191.35
463.52	209.32	192.25	186.39	178.48	190.49	463.519	198.03	231.27	289.16	190.16	463.519	252.51	221.56	225.77	228.5	232.41	463.52	231.19	270.42	310.78	191.36
464.169	209.1	192.41	192.38	178.58	190.38	464.171	197.97	225.86	289.31	189.95	464.169	252.24	221.55	225.07	228.67	232.38	464.17	230.92	262.76	311.06	191.33
464.819	209.25	192.05	193.44	178.47	190.12	464.821	197.96	223.01	288.85	190.17	464.82	252.28	221.51	225.57	228.91	232.14	464.82	231.02	255.73	311.15	191.23
465.468	209.68	192.31	190.67	178.23	189.73	465.47	198.21	222.03	288.86	189.96	465.47	252.48	221.05	225.46	228.01	232.66	465.469	230.87	253.12	311.01	191.36
466.12	209.8	192.74	185.8	178.42	189.56	466.118	198.38	221.83	289.09	190.63	466.12	252.31	224.82	225.78	228.39	232.32	466.12	231.28	251.81	310.99	191.32
466.768	209.66	192.57	184.04	178.72	189.8	466.77	198	221.8	288.94	190.08	466.77	252.95	225.69	225.78	228.24	232.46	466.768	231.11	250.77	311	191
467.42	210.06	192.06	183.86	178.26	189.87	467.419	198.34	221.66	288.8	190.08	467.42	253.51	224.12	225.61	228.32	232.76	467.42	230.79	250.79	310.93	190.96
468.068	210.07	192.31	183.84	178.13	189.44	468.071	198.3	221.96	289.05	189.95	468.069	253.1	221.71	226.06	228.39	232.49	468.065	230.81	250.81	310.37	191.11
468.72	209.96	191.92	183.98	178.37	189.31	468.72	198.14	221.87	288.72	190.03	468.719	253.26	221.72	225.92	227.64	232.88	468.718	231.15	250.09	310.58	191.13
469.368	210.24	192.48	183.61	178.23	188.92	469.37	198.35	222.15	289.09	189.95	469.369	252.8	222.05	225.92	228.32	231.98	469.37	230.82	250.47	310.7	191.29
470.019	210	192.71	183.8	178.19	189.08	470.019	197.88	222.03	289.02	190.35	470.018	253.01	220.48	225.88	227.82	232.22	470.018	230.68	250.06	310.74	191.19
470.669	210.66	192.71	184.54	178.28	188.8	470.67	198.11	222.04	288.75	190.01	470.67	253.19	220	225.94	228.16	232.05	470.665	231.14	250.32	311.08	191.12
471.32	210.52	192.74	183.95	178.36	196.56	471.32	197.96	222.2	289	190.04	471.318	253.13	220.08	225.98	227.96	232.65	471.316	230.9	250.48	310.85	191.18
471.968	210.47	192.6	184.23	178.48	205.53	471.97	198.08	221.77	288.91	190.19	471.97	253.31	219.67	225.84	228.5	232.36	471.966	231.01	250.4	310.85	191.13
472.62	210.76	192.95	184.05	178.77	206.47	472.62	198.14	222.16	288.94	190.26	472.618	253.46	220.23	226.04	228.49	232.7	472.616	230.9	250.22	310.89	191.03
473.268	210.73	193.61	184.32	178.46	200.26	473.271	198.09	221.8	288.53	190.11	473.269	255.5	219.93	225.71	228.63	232.5	473.27	231.18	250.63	310.77	191.34
473.918	211.04	195.04	184.59	178.68	194.83	473.919	197.82	221.99	288.64	190.16	473.919	257.39	220.53	226.13	227.94	232.2	473.921	231.76	250.05	310.55	190.96
474.569	211.06	194.56	184.71	178.65	192.02	474.571	198.01	222.29	288.79	189.96	474.569	255.36	220.49	225.45	228.07	231.94	474.565	237.43	250.11	310.58	190.94
475.219	211.25	192.09	184.45	178.38	191.25	475.22	198.05	222.22	288.89	190.06	475.219	253.32	220.27	226.17	228.35	232.15	475.221	236.21	249.71	310.95	190.94
475.871	211.02	191.96	184.43	178.91	190.59	475.871	197.88	222.17	288.87	189.98	475.869	253.17	220.32	225.44	228.12	232.03	475.869	231.89	250.06	310.77	190.68
476.519	211.13	192.66	184.67	178.52	190.78	476.521	198.21	222.56	288.94	189.97	476.519	251.74	220.07	225.95	228.17	231.94	476.515	229.69	250.32	310.68	190.89
477.171	211.07	192.56	184.21	178.32	190.21	477.17	198.05	222.49	288.79	190.43	477.169	251.4	220.63	226.07	228.07	232.51	477.165	229.85	250.23	310.89	190.99
477.821	211.24	192.96	184.48	178.54	190.08	477.82	197.96	222.43	288.88	190.14	477.819	251.15	220.27	225.9	228.36	232.24	477.816	229.16	250.44	310.97	191.03
478.47	211.09	191.81	184.72	178.61	189.8	478.47	198.23	221.99	288.62	189.71	478.469	250.59	219.95	225.83	227.95	232.38	478.465	228.85	250.43	310.6	190.98
479.12	211.41	192.62	184.99	178.55	189.73	479.12	198.18	222.52	288.71	189.65	479.119	250.9	220.5	225.75	228.06	231.8	479.121	229.22	249.84	310.74	190.75
479.77	212.34	192.62	184.3	178.31	189.41	479.77	198.06	226.77	288.63	189.89	479.77	250.77	219.98	225.76	228.14	232.03	479.764	229.35	250.48	310.6	190.99
480.42	214.72	192.02	184.7	178.26	189.47	480.42	197.88	234.38	288.38	189.99	480.42	250.21	220.5	226.41	228.36	232.19	480.416	229.65	249.97	310.85	191.26
481.07	214.13	192.6	184.55	178.24	189.11	481.07	197.7	233.07	288.54	189.76	481.069	250.8	220.85	225.82	228.21	232.3	481.066	229.38	250.03	311.02	190.34
481.72	210.7	192.21	184.99	178.47	189.12	481.72	197.82	227.57	289.04	190.04	481.719	250.65	220.66	225.79	228.05	232.41	481.72	229.57	249.84	311.01	191.21
482.371	210.04	192.63	184.65	178.44	189.28	482.37	197.94	223.4	288.55	189.99	482.368	251.17	221.01	225.91	228.3	232.59	482.365	229.91	250.11	311.14	190.99
483.019	209.27	192.73	184.85	178.55	189.16	483.019	198.24	222.39	288.93	190.1	483.02	251.11	221.09	226.15	227.87	232.65	483.015	229.64	250.17	310.68	190.81
483.671	209.19	192.62	185.21	178.68	188.95	483.67	198.3	222.28	289.11	189.75	483.668	250.93	221.14	226.26	227.64	232.23	483.665	229.73	250.12	310.7	190.81
484.319	209.21	192.74	185.03	178.39	189.06	484.32	197.98	222.03	289.12	189.89	484.321	251.59	221.16	226.12	228.41	232.42	484.317	229.45	249.77	310.88	191.06
484.969	209.81	192.46	184.9	178.57	188.74	484.97	198.01	222.15	288.67	189.76	484.968	251.62	221.28	226.18	228.25	232.09	484.971	229.67	250.11	310.43	190.87
485.619	209.28	192.45	185.19	178.31	188.94	485.62	198.02	222.01	288.67	189.83	485.621	251.82	220.91	226.39	228.04	232.45	485.615	229.3	249.83	310.73	190.44
486.269	209.3	192.89	185.31	178.5	188.78	486.27	198.07	222.12	288.62	190.2	486.269	252.01	220.36	226.41	228.11	232.37	486.265	229.73	249.57	310.63	190.43
486.92	209.48	192.78	185.06	178.15	189.02	486.92	198.2	222.16	288.66	189.78	486.92	251.72	220.9	225.78	227.88	232.05	486.917	229.3	249.69	310.52	190.54
487.57	209.75	192.95	185.26	178.84	189.51	487.57	198	222.2	288.82	189.83	487.57	252.19	220.5	226.22	228.05	232.25	487.569	229.43	249.94	310.64	190.74
488.22	209.69	192.5	185.03	178.26	202.39	488.22	198.25	222.05	288.9	189.97	488.22	251.79	221.13	226.27	228.17	232.24	488.215	229.94	250.05	310.52	190.43
488.869	209.77	192.49	185.04	178.57	207.56	488.871	198.26	221.91	289.17	190.02	488.869	252.4	220.52	226.4	227.9	232.13	488.87	229.69	250.21	310.89	190.49
489.52	210.05	192.18	185.24	178.46	205.67	489.519	198.21	222.13	289.03	189.67	489.521	252.14	221.03	226.45	227.64	232.23	489.52	230.31	249.91	310.56	190.89
490.17	210.31	192.2	185.41	178.36	198.88	490.171	198.23	222.25	288.68	189.54	490.169	252.43	221.22	226.13	227.96	232.55	490.166	230.41	250.29	310.49	190.91
490.82	210.3	192.51	185.35	178.42	194.23	490.819	197.96	221.71	288.95	189.73	490.82	252.6	221.03	225.5	227.78	232.3	490.818	235.7	250.17	310.65	191.47
491.47	210.29	192.42	185.28	178.4	191.77	491.471	197.88	222.29	288.77	189.75	491.47	252.4	221.08	225.84	232.36	232.2	491.466	235.55	250.48	310.17	190.9
492.12	210.57	192.58	185.27	178.52	190.73	492.119	197.88	221.76	288.87	189.9	492.12	252.31	225.89	225.74	248.47	231.9	492.12	231.72	250.01	310.43	190.68
492.77	210.49	192.61	185.56	178.88	190.47	492.771	197.84	222.13	288.56	189.39	492.77	252.28	225.12	226.09	249.84	232.23	492.77	230.04	250.31	310.55	190.9
493.42	210.7	192.55	185.5	178.65	190.49	493.42	197.69	222.15	288.94	189.96	493.42	252.92	221.95	226.14	242.82	232.01	493.414	229.77	250.3	310.56	190.75
494.071	210.78	192.9	185.78	179.08	191	494.07	199.52	222.35	288.96	189.52	494.07	252.59	220.46	225.53	234.8	232.02	494.066	229.14	250.18	310.57	190.66
494.719	210.71	192.88	188.77	178.3	190.47	494.72	206.85	222.32	288.92	190.01	494.72	252.25	219.46	225.91	230.63	232.36	494.72	229.16	250.3	310.67	190.61
495.369	211.03	192.67	193.56	178.7	190.14	495.371	206.86	222.64	288.81	194.81	495.37	252.56	219.04	225.69	229.58	232	495.366	229.41	250.23	310.77	190.72
496.02	211.23	192.91	193.14	178.11	189.71	496.019	202.09	222.62	288.86	198.86	496.02	252.72	219.15	226.24	228.37	231.72	496.02	229.47	250.53	310.67	190.57
496.67	211.12	193.22	189.16	178.4	189.47	496.67	199.27	222.19	288.76	198.14	496.671	252.95	218.88	226.12	228.54	232.11	496.669	229.85	249.9	310.62	190.81
497.319	210.97	192.68	184.7	177.9	189.44	497.32	197.47	222.62	288.79	195	497.321	253.19	219.39	225.79	228.26	232	497.319	229.49	249.94	310.52	190.42
497.971	210.74	192.65	183.01	177.72	189.21	497.968	197.18	222.5	299.87	192.55	497.971	253.46	219.58	225.76	228.38	232.15	497.965	229.6	250.15	310.65	190.89
498.619	210.8	192.48	182.76	180.61	189.15	498.619	197.03	222.36	311.58	191.37	498.621	253.03	219.01	225.78	228.43	232.13	498.615	229.58	250.42	310.55	190.98
499.271	210.81	192.38	182.46	194.68	189.08	499.269	197.08	222.16	310.83	190.92	499.271	253.11	219.61	225.66	227.86	231.55	499.27	229.64	250.29	310.34	190.75
499.92	210.7	192.75	182.87	195.91	188.86	499.919	196.79	222.53	303.23	190.7	499.921	253.32	219.23	225.69	227.62	231.82	499.916	229.77	249.94	310.28	190.72
500.57	210.75	192.67	183.25	190.41	188.7	500.569	197.04	222.48	296.83	190.58	500.571	253.46	219.94	225.83	227.77	232.28	500.564	229.6	250.03	310.65	190.37
501.22	210.72	194.46	183	183.76	188.55	501.219	196.83	226.61	293.41	190.38	501.22	253.27	220.12	226.17	227.96	231.9	501.22	229.66	250.15	310.64	190.47
501.871	210.94	194.46	183.38	181.28	188.96	501.869	197.04	234.79	291.9	190.63	501.87	253.24	219.86	225.86	227.43	232.11	501.869	229.26	250.28	310.69	191
502.519	210.99	192.66	183.62	179.91	188.63	502.519	197.05	234.28	290.86	190.29	502.52	253.51	219.89	225.83	227.91	231.85	502.52	229.63	250.3	310.7	190.84
503.17	211.26	191.78	182.94	179.48	188.31	503.169	196.77	228.05	290.12	190.19	503.17	253.43	219.95	225.82	227.34	232.08	503.17	230.03	250.33	310.55	190.93
503.82	211.21	191.83	183.57	178.52	188.72	503.821	197.13	223.53	289.77	190.23	503.82	253.33	220.24	225.8	227.56	231.79	503.815	229.63	250.16	310.3	196.51
504.47	210.96	192.56	183.38	178.35	188.51	504.469	196.84	222.71	289.29	190.33	504.469	253.19	220.11	225.87	228.1	232.1	504.469	229.83	250.11	310.5	202.17
505.12	211.13	192.74	183.52	178.74	188.29	505.119	196.76	221.97	288.46	190.61	505.121	253.39	219.88	226.09	227.92	231.91	505.115	230	250.46	310.53	201.63
505.77	210.88	192.15	182.92	178.26	188.09	505.771	197.02	221.98	288.42	190.55	505.769	253.51	220.1	225.88	227.58	232.08	505.769	229.72	250.17	310.55	197.36
506.42	211.09	192.24	183.19	178.38	188.28	506.42	196.75	221.93	288	190.38	506.421	253.59	220.01	226.04	227.56	232.24	506.42	231.17	250.05	310.74	193.98
507.07	211.02	192.19	182.86	178.26	188.29	507.069	196.96	221.99	287.68	190.21	507.069	253.97	220.32	226.04	227.99	232.18	507.066	235.27	250.46	310.48	194.07
507.719	211.12	192.28	187.3	178.01	188.38	507.719	196.73	221.92	287.24	189.76	507.721	253.95	220.3	225.64	227.93	231.98	507.72	233.99	250.05	310.05	192.74
508.369	211.13	192.71	192.04	178.22	188.45	508.371	196.8	222.35	287.65	190.65	508.369	253.51	220.37	225.37	227.74	231.78	508.364	230.5	250.67	310.37	192.58
509.019	211.17	192.3	191.03	177.89	188.15	509.018	197.06	222.03	287.61	190.17	509.021	253.64	219.86	225.55	227.31	232	509.02	228.94	250.03	310.72	192.77
509.669	211.15	191.86	186.75	178.23	188.25	509.671	196.64	222.41	287.48	190.52	509.669	253.62	221.18	225.65	227.31	232.09	509.666	229.28	250.11	310.33	192.59
510.319	211.36	192.01	183.69	178.28	188.2	510.319	196.85	221.92	287.04	189.95	510.321	253.93	225.61	225.86	227.42	232.24	510.314	228.78	250.06	310.09	192.33
510.97	211.08	192.07	183.7	178.01	188.37	510.97	196.52	221.9	287.1	190.17	510.969	254.14	223.69	225.56	227.62	232.72	510.97	228.9	250.19	310.21	192.19
511.62	211.12	191.74	183.01	178.23	188.17	511.621	196.78	221.68	287.14	190.02	511.619	253.68	222.41	225.68	227.51	232.46	511.614	228.97	249.88	310.4	192.15
512.269	211.11	191.89	183.51	178.26	188.05	512.271	196.85	221.7	286.87	189.65	512.269	253.67	220.16	225.58	227.17	232.03	512.27	229.14	249.89	310.38	192.31
512.919	211.3	191.6	183.26	177.62	188.1	512.921	196.57	221.95	287.06	189.68	512.919	253.96	219.6	226.12	227.5	232.18	512.913	229.17	250.32	310.47	191.83
513.57	211.47	191.98	183.3	178.23	187.89	513.571	196.78	222.09	287.31	189.93	513.565	253.86	219.49	225.98	227.66	232.05	513.565	229.56	250.04	309.97	191.66
514.22	211.75	191.83	183.6	177.78	187.8	514.216	196.63	221.88	287.3	190.02	514.215	253.94	218.97	225.84	227.5	232.13	514.219	229.25	250.28	310.2	191.19
514.87	211.42	191.95	183.48	177.92	188.01	514.871	196.97	221.88	287.07	189.64	514.867	253.95	219.19	225.72	227.77	231.85	514.866	229.02	250.52	310.29	191.36
515.52	211.15	191.81	183.29	177.84	187.66	515.521	196.54	221.75	286.71	189.48	515.521	253.61	219.73	226.11	228.01	231.99	515.518	229.27	250.38	310.1	191.15
516.17	211.39	192.23	183.36	177.64	188.14	516.171	196.85	221.98	287.11	189.27	516.167	253.69	219.1	226.21	227.28	231.78	516.17	229.63	250.52	310.73	191.37
516.818	211.58	192.08	183.64	177.9	187.85	516.821	196.84	222.24	286.88	189.58	516.82	253.92	219.31	225.53	227.51	232.15	516.815	229.45	250.33	310.37	190.84
517.47	211.39	191.59	183.45	177.88	188.07	517.47	196.78	221.99	286.97	189.88	517.47	254.36	219.05	225.92	227.85	232.1	517.465	229.26	249.97	310.18	191.03
518.119	211.26	191.94	183.46	177.92	187.76	518.12	196.71	221.95	286.93	190.03	518.116	254.26	219.69	225.77	227.64	231.83	518.119	229.61	249.97	310.18	191.12
518.769	211.66	191.49	183.35	177.41	187.78	518.771	196.7	221.85	286.76	195.05	518.765	254.31	219.46	225.31	227.81	232.2	518.769	229.41	250.23	309.96	191.26
519.419	211.53	192.42	183.78	178.1	187.76	519.421	196.83	222.1	287	198.87	519.419	254.53	219.15	225.59	227.95	232.47	519.415	229.34	250.01	309.93	190.72
520.07	211.5	192.37	183	177.6	187.81	520.07	196.61	222.04	286.99	196.79	520.069	254.36	219.62	226.16	227.3	232.43	520.066	229.32	249.88	309.79	190.84
520.718	211.09	192.36	183.82	177.33	187.59	520.72	196.59	222.09	286.97	193.31	520.719	254.28	219.34	225.51	227.48	232.33	520.718	229.42	255.22	310.2	190.94
521.369	211.25	193.65	183.47	177.57	187.4	521.37	196.73	222.21	287.21	191.48	521.365	254.05	219.59	225.29	227.63	231.85	521.369	229.54	268.75	309.72	191.29
522.019	211.34	192.12	183.55	177.65	187.7	522.02	196.67	222.25	286.97	190.62	522.015	253.95	218.92	225.68	227.5	231.75	522.014	229.22	269.2	309.88	190.56
522.669	211.14	190.6	183.33	177.29	187.87	522.67	196.49	222.18	286.92	190.71	522.67	254.27	219.63	226.04	227.43	231.82	522.668	229.55	262	310.28	190.83
523.319	211.21	191.46	183.57	177.78	187.4	523.32	196.52	221.92	286.79	190.21	523.314	254.29	219.72	226	227.74	231.75	523.319	229.54	254.89	309.78	190.84
523.969	211.39	191.27	183.69	177.47	187.28	523.966	197.04	222.15	287.21	189.88	523.966	253.93	219.54	225.7	227.64	231.43	523.964	229.44	251.82	309.85	190.85
524.618	211.52	191.8	183.13	177.72	187.44	524.62	196.71	222.54	287.24	190.27	524.615	253.74	219.5	224.89	227.58	231.41	524.616	229.52	250.18	309.88	190.51
525.27	211.42	191.67	183.73	177.49	187.49	525.27	196.69	222.26	287.16	189.83	525.266	254.42	219.52	225.6	227.26	231.57	525.264	229.27	250.32	309.81	190.53
525.918	211.18	191.82	183.23	177.58	187.35	525.92	196.66	222.15	286.95	189.85	525.921	254.14	219.59	225.64	227.56	231.44	525.916	229.3	249.63	309.92	190.39
526.57	211.32	192.03	183.44	177.8	187.55	526.57	196.86	221.88	287.03	189.85	526.569	254.36	219.16	226	227.73	231.62	526.564	229.36	249.51	309.95	190.34
527.22	211.77	191.65	183.8	177.54	188.23	527.22	196.56	221.98	287.28	189.76	527.216	254.45	219.62	225.88	227.47	231.68	527.221	229.56	249.33	310.08	190.56
527.868	211.66	191.33	183.61	177.61	187.92	527.87	196.66	221.65	287.21	190.12	527.866	254.24	219.44	225.58	227.37	231.74	527.87	230.1	249.27	309.57	190.91
528.52	211.97	191	191.11	177.69	187.82	528.521	196.29	222.16	286.93	189.4	528.517	254.34	219.43	225.64	226.98	231.67	528.517	229.27	249.63	310.18	190.29
529.168	211.67	191.22	193.43	177.58	187.57	529.17	196.68	229.58	287.13	189.81	529.166	254.67	219.8	225.64	227.07	231.51	529.171	229.68	248.63	309.81	190.31
529.82	211.78	191.45	190.3	177.78	187.31	529.82	196.62	235.57	287.06	189.93	529.82	254.71	220.03	225.82	227.34	232	529.815	230	248.86	309.68	190.84
530.468	211.78	191.04	186.75	177.69	187.06	530.471	196.59	232.3	287.16	189.8	530.466	254.48	224.94	225.85	227.27	231.56	530.466	229.59	248.95	310.1	190.36
531.12	212.08	191.66	183.09	177.6	187.39	531.119	196.54	226.11	287.07	190.01	531.114	254.45	225.9	225.36	227.31	231.79	531.114	229.57	248.45	309.65	190.19
531.769	211.77	191.49	183.21	177.43	187.47	531.771	196.57	222.51	287.29	189.57	531.77	254.34	223.67	225.32	227.28	232.03	531.769	229.75	248.85	309.65	190.49
532.421	211.77	191.45	182.74	177.61	187.42	532.42	196.99	221.79	287.24	189.88	532.42	254.4	220.31	225.21	226.92	231.8	532.415	229.88	248.8	309.48	190.66
533.068	211.48	191.79	183.21	177.7	187.67	533.07	196.85	221.7	287.65	189.98	533.068	254.53	219.65	233.32	227.52	231.7	533.069	229.34	248.88	309.77	189.92
533.721	211.89	191.76	183.32	177.61	187.57	533.716	196.91	221.56	287.77	190.08	533.716	254.8	219.11	233.42	227.49	232.02	533.715	229.37	248.81	309.71	190.41
534.369	215.32	192.06	183.42	177.85	187.66	534.37	196.74	221.75	287.48	189.74	534.366	254.7	219.23	229.41	227.39	232	534.37	229.71	248.48	309.82	190.17
535.02	214.43	192.05	183.69	177.75	187.51	535.02	196.74	221.86	287.72	189.3	535.016	257.94	218.85	226.36	227.11	231.73	535.02	229.91	248.79	309.79	190.08
535.669	210.85	191.91	183.46	177.45	187.67	535.671	196.93	221.19	287.52	189.85	535.666	257.41	218.71	225.01	227.43	231.78	535.67	229.53	248.76	309.89	190.06
536.32	209.08	192.02	183.27	177.24	187.35	536.319	196.64	221.2	287.5	189.6	536.316	253.78	218.86	223.95	227.23	231.32	536.316	229.88	248.73	309.63	190.45
536.97	209.28	191.92	182.86	177.26	187.3	536.971	196.73	221.49	287.57	189.91	536.97	253.68	218.41	223.16	227.05	231.58	536.97	229.71	248.82	309.39	190.08
537.62	209.32	191.62	183.62	177.04	187.63	537.619	196.73	221.82	287.57	189.26	537.619	252.68	219.29	223.76	226.97	231.7	537.616	229.29	248.54	309.85	190.42
538.269	209.32	191.74	183.41	176.98	187.24	538.271	196.75	221.63	287.46	189.12	538.27	251.84	218.89	223.34	226.86	231.96	538.27	229.62	248.9	309.81	190.59
538.919	209.23	193.61	183.27	177.62	187.4	538.919	196.81	221.56	287.58	189.48	538.92	251.37	218.91	223.33	227.2	231.62	538.919	230.23	253.04	310.2	190.57
539.569	208.95	192.43	183.56	177.49	187.57	539.569	196.66	221.47	287.18	189.34	539.57	251.07	219.03	223.66	227.31	231.86	539.566	230.57	267.05	309.92	190.11
540.221	209.54	190.71	183.41	177.16	187.38	540.219	196.52	221.53	287.29	189.43	540.22	251.36	219.17	223.58	226.96	231.41	540.215	236.47	267.54	309.47	190.66
540.869	209.42	191.37	183.95	177.12	187.25	540.869	196.56	221.48	287.21	189.53	540.87	251.31	219.28	223.87	227.31	231.56	540.865	236.05	259.86	309.58	190.39
541.52	209.17	191.89	183.74	177.23	187.27	541.519	196.49	221.58	287.64	189.4	541.52	251.3	219.09	224.12	226.95	231.85	541.521	230.88	254.02	309.64	190.39
542.17	209.09	191.76	183.79	177.06	187.46	542.169	196.73	221.57	287.28	189.18	542.171	251.33	219.52	224.11	226.9	231.83	542.165	228.66	251.5	310.04	190.06
542.82	209.43	192.01	183.96	177.32	187.21	542.819	202.93	221.55	287.25	190.64	542.819	251.16	218.95	223.87	226.98	231.83	542.815	228.54	250.35	309.72	190.63
543.47	209.5	191.91	183.7	176.94	187.12	543.469	206.51	221.62	287.58	196.88	543.47	251.23	219.36	224.04	226.97	231.39	543.465	228.27	250.12	309.29	190.6
544.12	209.33	191.84	184.01	177.15	186.78	544.119	203.1	221.68	287.84	198.22	544.12	251.57	219.51	223.76	226.88	231.64	544.121	228.76	250.06	309.71	190.35
544.769	209.72	191.06	183.76	181.09	187.05	544.769	199.44	221.87	287.8	195.09	544.771	251.19	219.75	224.08	227.27	231.97	544.765	228.36	249.79	309.69	190.38
545.42	209.42	191.6	189.29	194.42	187.23	545.419	197.24	221.77	287.49	192.14	545.421	251.27	219.17	224.73	227.1	232.24	545.415	228.3	249.53	309.65	190.48
546.066	209.52	191.01	192.11	194.34	187.04	546.069	196.93	221.89	287.52	191.05	546.071	251.46	219.75	223.75	226.86	232.18	546.065	228.19	249.5	309.69	190.45
546.72	209.79	190.91	189.9	187.84	187.46	546.72	196.79	222.01	287.55	190.2	546.72	251.51	219.62	224.04	241.75	232.08	546.715	228.78	249.05	309.72	190.52
547.37	210.07	190.89	185.96	182.07	187.04	547.37	196.47	222.23	287.64	190.17	547.37	251.93	219.36	224.29	249.63	231.76	547.365	228.67	249.33	309.63	190.39
548.02	209.92	191	183.17	179.66	187.08	548.02	195.97	221.93	287.53	190.07	548.021	251.87	219.58	224.21	245.71	231.68	548.015	229.08	249.03	309.81	190.33
548.669	210.29	191.66	183.24	178.92	186.68	548.671	196.59	222.02	287.61	189.69	548.671	251.68	219.2	224.33	236.21	231.93	548.665	228.85	249.03	309.55	190.11
549.321	209.91	191.78	182.94	178.69	187.17	549.32	196.25	221.8	287.72	189.99	549.321	251.76	219.78	224.56	231.75	231.58	549.319	229.13	248.92	309.38	190.54
549.97	210.23	191.87	182.88	177.85	186.82	549.966	196.29	222.12	287.62	189.94	549.971	252.26	220.41	224.52	229.31	232.11	549.97	229.1	249.08	309.84	190.43
550.62	210.37	191.49	182.46	178.01	186.57	550.619	196.12	222.27	287.54	189.95	550.62	251.82	219.58	224.73	228.43	231.56	550.616	229.31	249.49	309.58	190.73
551.27	210.13	191.52	183.12	177.33	186.73	551.271	196.24	222.17	287.66	189.92	551.27	251.83	219.34	224.34	228	232.16	551.27	229.29	249.39	309.99	190.42
551.92	210.25	191.4	183.48	177.62	186.86	551.918	196.2	222.34	287.47	190.15	551.921	252.36	220.36	224.25	227.75	231.45	551.92	229.3	249.2	309.87	190.52
552.569	210.64	191.6	183.66	177.8	186.71	552.571	196.09	222.37	287.28	189.87	552.571	252.16	220.22	224.44	227.72	231.64	552.566	229.17	249.45	309.92	190.67
553.221	210.39	191.43	183.37	177.09	186.94	553.219	196.11	222.33	287.3	189.91	553.221	252	219.52	224.54	227.69	231.57	553.22	228.9	249.37	309.47	192.48
553.869	210.74	191.38	183.26	176.98	186.9	553.871	196.13	222.12	287.52	189.71	553.871	252.4	219.94	224.44	227.86	231.61	553.866	229.09	249.69	309.71	200.37
554.521	210.43	191.62	183.74	177.08	186.71	554.519	196.46	222.3	287.57	189.91	554.519	252.44	224.32	224.35	227.44	231.6	554.515	229.17	248.77	309.65	201.3
555.169	210.52	191.65	183.7	177.28	186.93	555.171	196.42	222.21	287.5	189.77	555.171	252.74	225.21	224.41	227.02	231.76	555.166	228.9	249.37	309.57	196.72
555.82	210.48	191.3	183.34	177.22	187.11	555.819	196.15	221.9	287.32	189.87	555.819	252.81	222.98	224.85	227.08	231.45	555.814	229.1	249.06	309.74	193.45
556.469	210.4	191.25	183.75	176.78	186.8	556.471	195.8	221.72	287.28	189.62	556.471	256.86	220.57	224.68	226.75	231.78	556.471	229.37	249.4	309.78	193.11
557.121	210.36	191.37	183.72	176.48	186.86	557.119	195.78	222.11	287.27	189.67	557.119	255.01	220.18	224.87	227.07	231.82	557.119	229.05	248.82	309.49	192.62
557.769	210.46	191.5	183.42	177.08	186.81	557.771	195.75	221.83	287.27	190.02	557.771	252.68	218.95	224.89	227.04	231.95	557.766	229.38	248.89	309.48	192.61
558.419	210.49	191.79	183.69	176.55	186.92	558.419	195.96	222.28	287.27	189.73	558.419	252.96	218.69	224.63	226.75	231.54	558.416	228.9	249.08	309.6	192.43
559.069	210.36	191.8	183.55	176.99	187.14	559.071	196.01	222.25	287.5	189.95	559.069	251.61	218.63	224.12	226.56	231.4	559.069	229.28	249.18	309.5	191.85
559.719	210.14	191.65	183.13	175.98	186.72	559.719	196.19	222.04	287.43	189.94	559.719	250.88	218.42	224.75	227.47	231.56	559.719	229.38	249.15	309.61	191.95
560.369	210.46	192.4	183.45	176.35	187.19	560.369	195.82	222.07	287.39	189.38	560.371	250.53	219.29	224.68	226.93	231.65	560.37	228.97	249.63	309.51	191.21
561.02	210.4	193.13	183.77	176.75	186.61	561.019	196.03	222.28	287.31	189.9	561.019	250.35	218.31	224.53	226.94	231.6	561.016	229.13	262.62	309.54	191.4
561.67	210.5	190.34	183.7	176.98	187.11	561.671	196.18	221.92	287.64	189.71	561.67	250.22	218.4	224.4	226.91	231.38	561.67	229.68	268.47	309.35	191.41
562.32	210.6	189.92	183.57	176.53	187.01	562.32	196.3	222.22	287.59	189.63	562.32	250.54	218.72	224.59	226.73	231.38	562.316	229.48	264.29	309.5	191.11
562.97	210.43	190.69	184.6	177	187.23	562.97	195.93	222.22	287.34	189.69	562.97	250.51	218.52	225.04	227.07	231.67	562.964	228.95	255.43	309.16	190.91
563.62	210.79	190.62	183.58	176.12	186.88	563.62	195.99	222.13	287.32	189.39	563.62	250.85	219.07	224.31	226.57	231.81	563.62	229.25	251.87	309.45	190.66
564.27	210.58	190.31	183.45	176.66	186.53	564.271	195.96	222.61	287.4	189.35	564.271	250.49	218.69	224.82	226.72	231.56	564.264	229.23	249.92	309.51	190.73
564.92	210.51	190.44	183.61	176.72	187.03	564.919	195.99	222.25	287.57	189.52	564.919	250.81	218.62	224.76	226.98	231.56	564.916	229.55	249.45	309.16	191.11
565.57	210.68	190.45	183.58	176.43	186.93	565.571	196	222.37	287.77	189.46	565.57	251.02	218.88	224.74	227.2	231.25	565.57	229.62	249.7	310	190.77
566.22	210.41	191.15	183.61	176.75	186.61	566.221	196.4	222.34	287.34	189.31	566.22	250.91	218.82	224.42	226.5	231.72	566.22	229.81	248.98	309.93	190.68
566.87	210.44	190.84	183.65	176.49	186.69	566.87	196.14	222.36	287.33	189	566.87	250.86	219.48	225.28	226.91	244.8	566.868	229.87	249.22	309.51	190.6
567.52	210.7	190.81	184.05	176.86	186.84	567.521	196.58	222.15	287.17	189.27	567.52	250.93	218.77	224.76	226.33	250.96	567.516	229.43	249.06	309.56	190.14
568.168	210.43	191.2	183.93	177.01	187.09	568.169	196.01	222.23	287.23	189.13	568.17	251.31	219.2	224.84	226.87	246.23	568.17	229.65	248.75	309.56	190.63
568.819	210.54	190.89	184.06	176.57	186.89	568.821	196.09	221.99	287.11	192.1	568.82	251.43	219.03	224.98	227.14	237.8	568.82	229.61	249.15	309.29	190.3
569.469	210.25	190.73	183.48	176.97	186.66	569.47	196.08	222.02	287.49	197.22	569.469	251.46	218.82	224.79	226.64	234.27	569.464	229.52	249.2	309.43	190.42
570.119	210.94	191.22	183.66	176.24	186.54	570.119	196.33	222.14	287.56	198.06	570.119	251.75	219.21	224.71	227.16	232.72	570.121	230.13	248.94	309.21	190.45
570.769	210.42	191.22	184.11	176.82	186.83	570.771	196.23	222.2	287.29	194.62	570.769	251.5	219.33	224.75	226.93	232.45	570.764	230.04	248.76	309.18	190.36
571.419	210.41	190.79	183.73	176.47	186.87	571.419	196.26	222.16	287.38	191.63	571.42	251.59	219.7	224.81	227.16	232.07	571.416	229.75	249	309.47	190.12
572.069	210.56	190.99	184.04	176.61	186.84	572.071	203.55	222.2	287.24	190.74	572.07	252.02	219.52	224.59	226.81	232.2	572.07	229.22	248.74	309.3	189.98
572.719	210.42	191.47	184.06	176.63	186.61	572.721	205.65	222.35	287.15	190.01	572.721	251.74	219.19	225.11	226.82	231.84	572.714	229.83	248.75	309.21	189.98
573.368	210.49	190.74	183.66	176.62	186.66	573.37	200.97	222.18	287.65	189.68	573.369	252.06	219.62	225.18	227.01	231.39	573.365	229.72	249.05	309.77	190.18
574.019	210.64	191.1	183.73	176.51	186.75	574.02	197.86	222.07	287.24	189.89	574.019	252.05	219.74	224.76	226.21	231.54	574.015	229.52	248.75	309.28	193.08
574.669	210.66	190.93	184.08	176.61	186.45	574.671	196.18	221.69	287.19	189.95	574.669	252.13	219.31	225.07	227.09	231.26	574.666	229.6	248.96	309.34	201.07
575.32	210.87	190.88	184.01	176.69	186.22	575.321	195.75	221.83	287.27	189.66	575.319	251.95	219.27	224.47	226.31	231.23	575.319	229.9	248.92	309.32	201.55
575.968	210.61	190.54	183.64	176.24	186.49	575.971	195.62	222.02	287.32	189.57	575.97	252.03	219.3	225.12	226.29	231.07	575.966	229.77	248.87	309.46	197.11
576.62	210.41	191.22	183.9	176.38	186.19	576.62	195.83	221.65	287.33	189.62	576.62	251.97	219.52	224.68	226.24	230.71	576.614	229.71	249.02	309.44	194.15
577.268	210.35	190.84	183.94	176.57	186.17	577.27	195.37	222.23	287.36	191.04	577.27	252.02	219.79	224.75	226.82	231.22	577.27	229.99	248.99	309.42	193.05
577.92	210.53	191	183.58	176.23	186.32	577.92	195.81	222.03	287.59	195.31	577.918	252.37	219.78	224.8	226.43	231.06	577.914	229.95	248.67	309.01	192.9
578.568	210.49	190.83	187.44	188.2	186.15	578.57	195.73	221.95	287.5	195.32	578.57	252.12	219.79	224.7	226.93	230.79	578.57	229.98	249.14	309.51	192.53
579.218	210.89	190.86	192.24	193.8	186.49	579.22	195.67	222.29	287.73	192.07	579.219	252.3	219.75	224.61	226.82	231	579.215	229.86	248.89	309.36	192.69
579.868	210.71	191.27	191.47	190.62	194.21	579.87	195.79	221.96	287.45	190.92	579.871	252.48	220.04	225.07	226.51	230.87	579.865	230.1	248.84	309.53	192.61
580.518	210.77	191.35	187.57	183.28	205.32	580.521	195.56	222.3	287.76	190.14	580.519	253	218.9	224.9	226.11	230.52	580.519	229.76	248.44	309.09	191.97
581.168	210.91	191.95	183.59	179.97	205.92	581.171	195.71	222.05	287.71	190.19	581.171	252.89	220.07	224.44	226.32	230.66	581.165	229.7	248.79	309.26	191.69
581.819	211.13	191.42	182.2	178.59	201	581.821	195.73	221.8	287.39	190.37	581.818	253.01	224.28	224.98	226.32	230.94	581.82	230	248.82	309.42	191.86
582.47	210.48	192.21	181.8	177.74	193.86	582.469	195.65	222.02	287.68	190.11	582.471	252.82	223.89	224.86	226.33	230.64	582.469	229.84	248.79	309.16	191.73
583.119	211	192.98	182.11	177.31	190.51	583.121	195.63	225.18	287.86	190.54	583.119	252.45	221.95	224.99	226.18	230.51	583.119	230.09	248.86	309.32	191.66
583.77	210.7	191.17	181.68	176.67	188.3	583.769	195.93	234.24	287.61	189.99	583.77	253.03	221.66	224.71	226.58	230.87	583.769	230.45	248.77	309.36	191.72
584.418	210.86	189.55	181.99	176.73	188.11	584.421	195.81	234.19	287.81	189.85	584.42	252.28	220.57	224.78	226.22	230.35	584.42	230.05	248.85	309.3	191.04
585.07	210.69	190.15	182.1	176.75	187.4	585.071	196.04	228.2	287.58	190	585.069	252.58	220.33	227.74	226.07	230.57	585.069	229.85	248.83	309.36	190.94
585.719	210.86	190.39	182.76	185.11	187.07	585.721	195.6	223.59	287.86	190.04	585.719	252.71	218.88	233.59	225.78	230.71	585.719	229.89	249.16	309.22	190.65
586.371	210.81	190.37	182.4	189.65	186.72	586.37	195.95	221.94	287.73	190.03	586.369	252.66	220.19	231.67	225.9	230.79	586.369	230.24	248.77	309.15	191.3
587.019	210.56	190.32	182.42	185.62	186.84	587.02	195.92	221.58	287.82	189.56	587.019	252.56	219.38	227.33	226.25	230.58	587.019	229.86	248.7	309.56	190.84
587.669	210.72	190.47	182.49	180.09	186.93	587.67	196.01	221.3	287.37	189.96	587.67	252.6	218.96	225.14	226.27	230.66	587.669	230.12	248.56	308.9	191.01
588.321	211.09	190.25	182.75	179.03	186.7	588.32	196.03	222.02	287.67	189.87	588.319	252.66	218.26	224.17	226.31	230.29	588.319	229.87	248.92	309.59	190.85
588.971	210.71	190.64	183.05	177.95	186.28	588.969	196.12	221.57	287.79	190.13	588.969	252.87	218.82	223.85	226.29	230.86	588.969	230	248.49	308.97	191.43
589.62	211.02	190.52	182.63	177.1	186.29	589.621	196.35	221.81	287.91	190.05	589.62	252.97	218.89	223.07	225.94	230.67	589.619	229.96	248.49	309.1	198.19
590.27	213.86	190.67	182.96	176.9	186.4	590.269	196.16	221.06	287.98	189.73	590.27	252.76	218.58	222.88	226.43	230.86	590.27	229.93	248.94	309.38	200.57
590.92	214.32	191.14	182.86	177.23	186.01	590.921	195.85	221.46	287.69	189.75	590.919	253.09	218.63	222.73	225.8	230.7	590.92	230.25	248.4	309.42	197.28
591.57	211.99	190.39	182.82	177.06	186.51	591.571	196.04	221.15	287.7	189.64	591.569	255.7	218.53	222.68	225.97	230.3	591.57	230.09	248.95	309.52	194.01
592.22	209.85	190.25	182.67	177.05	186.19	592.219	195.93	221.48	287.97	189.7	592.22	256.51	218.3	222.93	225.83	230.56	592.22	229.97	248.7	309.32	192.94
592.87	208.98	190.43	182.75	177.11	186	592.87	196.22	221.06	287.65	189.55	592.87	252.8	218.21	222.72	225.57	230.47	592.87	230.09	248.94	309.37	192.94
593.521	208.53	190.63	182.67	176.66	185.66	593.521	196.15	221.58	287.97	189.9	593.52	252.75	218.69	223.03	226.05	230.47	593.52	229.91	249.03	309.44	192.73
594.17	208.51	190.45	183.13	176.74	185.34	594.171	196.34	221.43	287.89	189.85	594.17	251.32	217.9	222.91	226.07	230.15	594.17	229.9	249.05	309.18	192.51
594.821	208.29	191.09	182.97	176.52	185.71	594.821	199.65	221.24	288.02	189.93	594.82	250.69	218.03	223.31	226.08	230.24	594.82	229.98	248.95	309.3	192.31
595.471	208.46	191.13	183.21	176.22	185.52	595.471	205.88	221.18	287.86	189.41	595.47	250.52	218.45	223.58	226.11	230.4	595.471	230.12	248.81	309.16	192.06
596.121	208.19	190.4	183.21	176.35	185.52	596.12	203.73	221.17	287.88	189.31	596.118	250.34	218.4	223.53	225.93	230.53	596.114	229.96	248.72	309.17	192.23
596.771	208.48	190.76	182.41	175.9	185.76	596.77	199.46	221.36	287.71	189.85	596.77	250.31	218.54	223.44	226.37	230.26	596.768	229.98	248.51	308.95	191.97
597.421	208.5	190.57	182.57	176.18	186.01	597.42	197.4	221.33	287.74	189.28	597.42	250.29	218.53	223.73	226.37	230.83	597.42	230.18	248.5	309.45	191.99
598.071	208.24	191.05	182.76	175.81	185.55	598.07	196.13	221.32	288.08	189.52	598.069	250.66	218.68	223.99	226.36	230.52	598.069	230.19	248.88	309.32	191.62
598.721	208.33	190.78	182.86	175.8	185.22	598.719	195.49	221.45	287.8	189.11	598.719	250.34	219.33	223.68	226.06	230.5	598.719	230.03	248.85	309.33	191.54
599.37	208.66	190.05	183.46	176.14	185.16	599.371	195.69	221.4	288.14	191.66	599.369	250.89	218.59	223.84	225.76	230.23	599.371	230.1	248.87	309.25	191.24
600.02	208.88	190.29	183.52	182.95	185.55	600.019	195.54	221.63	287.68	197.3	600.021	250.93	218.3	223.79	226.05	230.48	600.018	229.94	248.87	309.18	191.3
