# Supplementary material for: The gut contractile organoid for studying the gut motility regulated by coordinating signals between interstitial cells of Cajal and smooth muscles
Source: eLife. 2025 Aug 22;13:RP97860. doi: 10.7554/eLife.97860 (PMC12373395; doi:10.7554/eLife.97860)
Supplement: Figure 4—source data 1. [file elife-97860-fig4-data1.xlsx]

## Sheet: Fig4B-timelapse
Whole	Time [s]	#1 (TD)	#1 (EGFP)
	0.065	245.14	50.56
	0.769	244.95	51.22
	1.464	244.85	50.36
	2.167	244.86	50.72
	2.867	244.93	50.51
	3.567	244.97	51.11
	4.269	244.94	50.62
	4.969	244.87	50.95
	5.67	244.91	50.94
	6.37	244.73	50.66
	7.068	245.08	49.63
	7.768	244.98	50.64
	8.468	244.92	49.78
	9.168	244.68	49.7
	9.867	244.82	49.46
	10.566	244.89	49.43
	11.266	244.5	48.74
	11.967	244.53	49.78
	12.667	244.79	48.89
	13.368	244.86	49.83
	14.066	244.78	50.12
	14.768	244.85	50.42
	15.468	244.65	49.01
	16.168	244.42	49.65
	16.868	244.42	49.39
	17.57	244.38	49.16
	18.268	244.35	49.52
	18.969	244.42	48.45
	19.669	244.53	49.02
	20.367	244.49	50.73
	21.069	243.84	50.03
	21.768	243.69	50.04
	22.468	243.31	49.75
	23.169	243.28	49.99
	23.868	243.12	49.54
	24.568	243.24	49.48
	25.268	243.37	49.38
	25.97	243.4	49.67
	26.669	243.36	50.02
	27.369	243.35	49.07
	28.068	243.52	49.14
	28.768	243.49	49.96
	29.467	243.47	49.11
	30.167	243.46	49.31
	30.867	243.67	49.36
	31.567	243.73	49.84
	32.267	243.74	49.31
	32.969	243.28	50.49
	33.668	243.49	50.4
	34.369	243.77	50.24
	35.069	243.53	50.06
	35.769	243.42	50.16
	36.467	243.31	50.05
	37.169	243.51	50.86
	37.869	243.52	51.78
	38.568	243.4	51.68
	39.269	243.22	51.76
	39.968	243.01	52.79
	40.669	243.17	52.06
	41.368	243.31	51.76
	42.068	243.34	52.16
	42.768	242.86	51
	43.468	242.78	50.9
	44.169	243.01	51.33
	44.868	243.21	50.9
	45.569	243.01	50.98
	46.269	242.95	50.77
	46.969	243.3	51.75
	47.669	243.2	50.04
	48.367	243.12	50.6
	49.069	242.85	50.5
	49.767	242.89	50.01
	50.468	242.91	50.18
	51.168	242.94	50.95
	51.868	243.11	50.3
	52.569	243.06	49.24
	53.269	243.24	51.29
	53.969	243.77	105.46
	54.668	253.16	148.51
	55.368	260.87	142.43
	56.067	262.66	163.4
	56.768	265.48	176.56
	57.467	266.05	177.45
	58.168	265.36	180.31
	58.868	263.8	177.33
	59.567	261.2	175.72
	60.267	258.41	159.93
	60.968	253.49	130.16
	61.669	250.49	109.26
	62.367	248.6	95.56
	63.067	248.25	83.98
	63.769	247.64	77.04
	64.468	246.92	70.84
	65.17	246.49	67.86
	65.868	246.2	63.95
	66.569	245.91	61.95
	67.269	245.86	58.62
	67.969	245.44	55.84
	68.669	244.79	53.93
	69.369	244.71	53.21
	70.068	244.37	52.37
	70.768	244.7	51.82
	71.467	244.62	51.28
	72.169	244.42	50.21
	72.868	244.56	50.97
	73.568	244.26	49.5
	74.268	244.09	49.42
	74.967	244.18	49.57
	75.668	243.82	48.41
	76.369	244.01	49.66
	77.066	243.91	49.87
	77.768	244.05	54.26
	78.469	249.27	118.5
	79.167	259.01	135.03
	79.869	263.27	138.08
	80.568	266.54	158.09
	81.267	267.95	156.85
	81.968	264.32	136.14
	82.668	257.81	112.85
	83.369	252.42	95.73
	84.067	250.43	82.85
	84.768	249.18	73.56
	85.468	248.28	68.03
	86.169	247.54	63.4
	86.869	247.04	58.33
	87.567	246.53	56.1
	88.268	246.42	53.09
	88.971	246.02	52.25
	89.669	245.94	51.39
	90.369	245.66	51.62
	91.071	245.37	49.64
	91.769	245.27	49.59
	92.468	245.13	48.75
	93.168	244.81	49.27
	93.869	244.86	49.47
	94.568	244.81	48.73
	95.268	244.76	48.89
	95.968	244.57	48.9
	96.668	244.29	49.5
	97.368	243.99	48.75
	98.068	244.22	49.91
	98.768	244.19	49.45
	99.469	244.05	48.62
	100.169	244.15	49.15
	100.869	244.68	50.73
	101.567	244.58	52.81
	102.269	243.86	54.44
	102.968	243.55	54.03
	103.668	243.55	52.78
	104.369	243.45	51.68
	105.068	243.22	51.43
	105.769	243.19	50.41
	106.469	243.03	50.13
	107.169	242.99	49.42
	107.868	242.74	49.09
	108.569	242.42	49.06
	109.27	242.62	48.74
	109.969	242.88	48.21
	110.67	243.16	49.17
	111.37	243.09	50.96
	112.068	242.86	51.53
	112.768	242.53	51.35
	113.468	242.26	51.31
	114.167	242.71	50.8
	114.867	242.76	51.43
	115.569	242.69	51.03
	116.268	242.46	49.77
	116.968	242.28	49.5
	117.668	242.24	49.29
	118.368	242.26	49.44
	119.068	242.52	50.32
	119.768	242.86	51.68
	120.468	243.39	80.7
	121.168	252.37	135.96
	121.867	259.67	131.95
	122.567	260.17	143.38
	123.267	264.08	163.53
	123.969	265.68	163.99
	124.669	265.18	161.1
	125.368	262.66	155.7
	126.067	257.09	132.75
	126.77	251.66	108.34
	127.468	249.11	94.31
	128.17	248.22	83.78
	128.868	247.18	75.84
	129.569	246.51	70.63
	130.269	245.97	65.39
	130.968	245.64	62.52
	131.668	245.22	60.27
	132.369	245.13	58
	133.069	244.76	56.75
	133.769	244.25	53.91
	134.469	244.39	52.87
	135.168	244.44	52.62
	135.868	244.03	50.71
	136.569	244.28	50.6
	137.268	243.87	49.49
	137.967	243.8	48.85
	138.667	243.57	48.54
	139.367	243.89	48.76
	140.067	243.94	50.21
	140.767	243.61	49.92
	141.468	243.54	49.41
	142.167	243.66	49.35
	142.868	242.58	49.97
	143.569	241.65	54.56
	144.269	246.89	116.01
	144.967	256.58	133.84
	145.667	259.68	124.64
	146.368	256.84	128.16
	147.068	260.78	148.47
	147.768	261.4	132.92
	148.467	256.19	109.33
	149.169	250.47	91.18
	149.867	247.31	80.03
	150.57	247.07	72.42
	151.268	246.34	66.2
	151.969	245.92	62.57
	152.669	245.35	59.52
	153.367	243.76	56.34
	154.068	243.53	54.29
	154.769	243.47	52.57
	155.47	243.28	52.12
	156.168	243.06	52.18
	156.864	243.11	52.38
	157.568	242.91	53.4
	158.264	242.81	52.84
	158.969	242.49	51.41
	159.668	242.75	51.49
	160.368	242.32	51.26
	161.07	242.36	50.39
	161.768	242.38	50.26
	162.469	242.42	48.75
	163.169	242.26	48.96
	163.868	242.15	48.87
	164.568	242.16	48.83
	165.269	242.28	47.82
	165.967	242.28	49.25
	166.669	242.08	47.27
	167.369	242.22	48.28
	168.069	242.02	48.4
	168.769	241.96	48.02
	169.468	242.08	47.98
	170.168	242.08	48.08
	170.869	241.89	48.29
	171.569	241.94	48.06
	172.269	242.01	48.08
	172.969	241.79	49.33
	173.669	241.75	48.55
	174.37	241.58	49.01
	175.068	241.48	48.78
	175.769	241.64	49.43
	176.469	241.66	49.89
	177.169	241.43	50.21
	177.867	241.37	52.13
	178.567	241.2	52.19
	179.267	241.22	51.79
	179.968	241.29	51.2
	180.668	241.28	49.84
	181.367	241.5	49.96
	182.067	241.24	48.99
	182.768	241.35	49.7
	183.467	241.3	50.22
	184.169	241.44	49.28
	184.868	241.5	49.92
	185.568	241.3	49.58
	186.269	241.58	48.89
	186.968	241.46	51.29
	187.67	240.98	50.44
	188.368	240.67	49.53
	189.067	240.66	48.63
	189.767	241.09	49.06
	190.467	241.05	50.65
	191.167	241.03	49.36
	191.868	241.39	50.01
	192.564	241.07	49.64
	193.268	241.15	52.51
	193.968	241.27	54.76
	194.668	241.15	71.3
	195.369	248.54	134.75
	196.068	257.09	142.68
	196.767	259.13	151.68
	197.467	261.41	166.08
	198.167	263.04	163.01
	198.867	261.81	162.71
	199.568	257.5	142.74
	200.269	251.83	122.03
	200.968	248.07	103.76
	201.667	246.58	92.45
	202.368	245.92	87.13
	203.067	245.49	87.01
	203.767	251.51	135.64
	204.467	259.06	153.88
	205.167	262.85	160.28
	205.867	263.57	158.26
	206.567	260.54	147.85
	207.268	256.49	133.73
	207.969	252.37	115.69
	208.668	249.59	103.19
	209.368	248.01	90.48
	210.068	247.46	82.2
	210.768	247.09	74.62
	211.468	246.62	67.74
	212.168	246.2	62.39
	212.867	245.84	58.91
	213.567	245.55	56.59
	214.269	244.98	54.74
	214.969	244.2	53.03
	215.669	243.74	51.48
	216.37	243.91	52.08
	217.069	243.81	50.41
	217.77	243.77	50.8
	218.468	243.6	50.07
	219.169	243.46	49.25
	219.867	243.37	49.18
	220.568	243.57	49.05
	221.269	243.5	47.8
	221.968	243.38	47.74
	222.668	243.13	47.86
	223.369	243.04	47.91
	224.067	243.39	48.23
	224.768	243.2	47.98
	225.468	243.32	47.8
	226.168	243.16	48.18
	226.868	242.84	48.35
	227.568	242.58	49.11
	228.269	242.57	48.39
	228.967	242.78	48.82
	229.668	242.77	48.89
	230.369	242.49	48.92
	231.069	242.55	50.09
	231.769	242.59	48.87
	232.468	242.31	49.38
	233.168	242.29	49.94
	233.869	242.52	49.65
	234.57	242.47	48.9
	235.269	242.45	49.6
	235.97	242.41	50.49
	236.67	241.95	49.34
	237.37	241.88	48.06
	238.068	241.55	49.16
	238.77	241.48	48.8
	239.468	241.52	49.66
	240.168	241.48	51.66
	240.868	247.78	116.28
	241.568	256.13	129.56
	242.268	257.39	119.53
	242.968	252.14	113.61
	243.668	253.68	138.06
	244.369	258.81	141.58
	245.067	256.09	117.6
	245.768	249.65	96.58
	246.469	246.09	83.7
	247.169	244.36	73.32
	247.867	243.92	65.23
	248.569	243.71	63.8
	249.269	243.21	57.68
	249.968	242.88	56.78
	250.668	242.61	54.72
	251.369	242.58	53.08
	252.069	242.41	51.54
	252.769	242.21	51
	253.469	241.93	50.13
	254.169	242.02	49.52
	254.868	241.97	49.39
	255.57	242.1	49.07
	256.269	242.28	48.87
	256.968	242.03	49.11
	257.669	241.7	49.19
	258.369	241.6	49.69
	259.069	242.08	48.25
	259.769	241.94	48.05
	260.467	241.6	48
	261.169	241.82	47.81
	261.868	241.6	48.23
	262.568	241.63	48.51
	263.268	241.64	49.1
	263.967	241.7	47.5
	264.667	241.74	47.83
	265.368	241.64	48.88
	266.067	241.39	48.44
	266.768	241.53	48.21
	267.468	241.62	47.82
	268.169	241.43	48.27
	268.867	241.29	48.13
	269.567	241.15	48.02
	270.267	241.14	47.6
	270.968	241.24	48.46
	271.668	240.95	49.74
	272.367	240.8	50.24
	273.068	241.17	50.78
	273.769	241.12	50.15
	274.469	240.66	49.41
	275.169	240.64	49.11
	275.869	240.49	49.55
	276.568	240.66	48.64
	277.267	240.41	50.15
	277.968	240.16	50.59
	278.668	240.1	50.84
	279.368	240.22	51.36
	280.069	240.18	52.43
	280.768	240.63	50.66
	281.468	240.46	50.74
	282.169	240.42	51.37
	282.867	240.49	51.28
	283.568	239.94	49.69
	284.268	239.87	50.2
	284.969	240.08	49.58
	285.669	240.29	50.09
	286.369	240.61	50.47
	287.069	240.78	49.96
	287.769	240.82	50.19
	288.468	241	48.67
	289.169	240.8	49.11
	289.868	240.72	49.77
	290.57	240.39	50.67
	291.268	240.62	50.97
	291.969	240.73	51.21
	292.669	240.18	51.4
	293.37	239.97	50.92
	294.069	240.19	50.58
	294.768	240.31	50.39
	295.469	240.29	49.12
	296.169	240.32	48.48
	296.869	240.4	49.31
	297.569	240.45	48.7
	298.268	240.38	50.25
	298.97	240.52	50.99
	299.669	240.35	52.31

## Sheet: Fig4C-timelapse
Time [s]	#1 (ICC)	#2 (ICC)	#3 (ICC)	#1 (SMA)	#2 (SMA)	#3 (SMA)	#2 (ICC)	#3 (SMC)	#1 (ICC)	#2 (ICC)	#3 (ICC)	#1 (SMA)	#2 (SMA)	#3 (SMA)	#2 (ICC)	#3 (SMC)
0	28.62	30.44	60.36	101.34	123.73	164.06	57.65	60.08	0	0	0	0	0	0	0	0
0.704	24.94	32.44	60.61	94.94	118.57	182.48	62.77	66.04	-3.68	2	0.25	-6.4	-5.16	18.42	5.12	5.96
1.399	23.99	33.34	53.13	93.88	115.38	172.02	58.84	50.83	-4.63	2.9	-7.23	-7.46	-8.35	7.96	1.19	-9.25
2.102	27.39	36.79	53.44	97.92	116.07	176.53	58.65	58.02	-1.23	6.35	-6.92	-3.42	-7.66	12.47	1	-2.06
2.802	26.37	29.6	53.69	90.26	117.11	176.38	73.6	71.62	-2.25	-0.84	-6.67	-11.08	-6.62	12.32	15.95	11.54
3.502	24.94	34.21	61.17	96.51	114.85	182.63	54.39	65.3	-3.68	3.77	0.81	-4.83	-8.88	18.57	-3.26	5.22
4.204	21.07	32.7	52.2	91.39	106.74	169.9	60	70.41	-7.55	2.26	-8.16	-9.95	-16.99	5.84	2.35	10.33
4.904	24.35	38.84	53.14	91.22	99.84	169.58	62.28	68.03	-4.27	8.4	-7.22	-10.12	-23.89	5.52	4.63	7.95
5.605	23.48	30.12	56.53	92.76	108.38	184.46	64.6	68.47	-5.14	-0.32	-3.83	-8.58	-15.35	20.4	6.95	8.39
6.305	28.02	31.06	53.34	92.34	109.38	180.11	57.17	72.71	-0.6	0.62	-7.02	-9	-14.35	16.05	-0.48	12.63
7.003	23.95	32.49	56.03	88.97	103.86	164.33	65.83	63.34	-4.67	2.05	-4.33	-12.37	-19.87	0.27	8.18	3.26
7.703	24.82	34.28	64.74	86.88	106.9	161.95	65.01	65.52	-3.8	3.84	4.38	-14.46	-16.83	-2.11	7.36	5.44
8.403	22.82	33.61	56.63	84.61	89.42	154.09	57.4	64.2	-5.8	3.17	-3.73	-16.73	-34.31	-9.97	-0.25	4.12
9.103	23.75	36.26	52.6	90.35	96.85	150.34	46.47	65.12	-4.87	5.82	-7.76	-10.99	-26.88	-13.72	-11.18	5.04
9.802	24.43	32.87	51.39	82.87	100.82	160.27	62.24	67.16	-4.19	2.43	-8.97	-18.47	-22.91	-3.79	4.59	7.08
10.501	24.7	35.54	54	91.15	102.59	158.56	58.47	57.47	-3.92	5.1	-6.36	-10.19	-21.14	-5.5	0.82	-2.61
11.201	25.39	31.46	52.92	87.15	103.76	156.67	65.52	68.83	-3.23	1.02	-7.44	-14.19	-19.97	-7.39	7.87	8.75
11.902	24.33	31.7	57.88	88.76	90.25	148.26	71.44	65.21	-4.29	1.26	-2.48	-12.58	-33.48	-15.8	13.79	5.13
12.602	25	34.89	49.34	86.16	108.53	138.06	59.77	73.48	-3.62	4.45	-11.02	-15.18	-15.2	-26	2.12	13.4
13.303	23.89	33.36	52.15	88.79	115.85	137.32	69.95	61.7	-4.73	2.92	-8.21	-12.55	-7.88	-26.74	12.3	1.62
14.001	26.21	41.2	56.88	85.63	104.46	149.73	54.93	67.65	-2.41	10.76	-3.48	-15.71	-19.27	-14.33	-2.72	7.57
14.703	25.75	36.34	61.01	92.18	103.74	157.29	59.95	65.61	-2.87	5.9	0.65	-9.16	-19.99	-6.77	2.3	5.53
15.403	23.92	32.5	55.49	86.67	101.69	158.53	66.52	60.56	-4.7	2.06	-4.87	-14.67	-22.04	-5.53	8.87	0.48
16.103	28.22	32.61	61.57	84.37	104.06	157.26	59.97	68.09	-0.4	2.17	1.21	-16.97	-19.67	-6.8	2.32	8.01
16.803	25.77	33.19	49.83	86.9	101.82	169.13	60.37	66.68	-2.85	2.75	-10.53	-14.44	-21.91	5.07	2.72	6.6
17.504	25.32	34.38	55.43	86.79	97.4	161.43	67.72	65.77	-3.3	3.94	-4.93	-14.55	-26.33	-2.63	10.07	5.69
18.203	22.3	33.4	53.1	87.65	95.1	172.26	58.27	64.1	-6.32	2.96	-7.26	-13.69	-28.63	8.2	0.62	4.02
18.904	21.8	28.26	53.36	85.14	97.51	160.22	46.92	59.02	-6.82	-2.18	-7	-16.2	-26.22	-3.84	-10.73	-1.06
19.604	23.53	34.71	54.41	86.71	101.49	148.77	62.63	67.08	-5.09	4.27	-5.95	-14.63	-22.24	-15.29	4.98	7
20.302	19.81	38.97	59.87	83.56	96.11	143.69	68.41	74.31	-8.81	8.53	-0.49	-17.78	-27.62	-20.37	10.76	14.23
21.003	26.18	36.51	57.71	90.8	94.08	140.42	70.49	57.3	-2.44	6.07	-2.65	-10.54	-29.65	-23.64	12.84	-2.78
21.703	25.56	35.05	53.46	84.98	93.03	150.04	58.83	60.03	-3.06	4.61	-6.9	-16.36	-30.7	-14.02	1.18	-0.05
22.402	24.11	34.49	67.59	88.22	95.08	158.46	55.87	67.8	-4.51	4.05	7.23	-13.12	-28.65	-5.6	-1.78	7.72
23.103	26.58	34.4	51.46	87.26	92.94	159.86	57.89	64.59	-2.04	3.96	-8.9	-14.08	-30.79	-4.2	0.24	4.51
23.802	22.38	33.23	55.58	91.26	85.53	165.68	65.55	62.65	-6.24	2.79	-4.78	-10.08	-38.2	1.62	7.9	2.57
24.502	24.84	36.55	50.89	93.6	83.57	163.83	66.49	67.33	-3.78	6.11	-9.47	-7.74	-40.16	-0.23	8.84	7.25
25.202	25.15	30.8	52.67	95.75	81.94	187.81	64.23	71.53	-3.47	0.36	-7.69	-5.59	-41.79	23.75	6.58	11.45
25.904	23.3	36.92	49.86	88.96	83.76	181.09	56.08	54.41	-5.32	6.48	-10.5	-12.38	-39.97	17.03	-1.57	-5.67
26.603	25.05	38.24	56.84	91.84	85.42	189.73	68.76	60.71	-3.57	7.8	-3.52	-9.5	-38.31	25.67	11.11	0.63
27.303	20.45	34.24	51.29	89.88	87.91	169.13	67	62.38	-8.17	3.8	-9.07	-11.46	-35.82	5.07	9.35	2.3
28.002	28.73	35.32	51.28	94.54	75.28	165.93	50.09	65.05	0.11	4.88	-9.08	-6.8	-48.45	1.87	-7.56	4.97
28.702	23.32	31.52	57.1	93.56	78.94	171.71	61.89	59.29	-5.3	1.08	-3.26	-7.78	-44.79	7.65	4.24	-0.79
29.401	23.25	31.58	50	89.14	77.35	177.98	53.6	59.14	-5.37	1.14	-10.36	-12.2	-46.38	13.92	-4.05	-0.94
30.101	21.27	29.87	57.48	89.58	84.07	192.61	51.12	60.05	-7.35	-0.57	-2.88	-11.76	-39.66	28.55	-6.53	-0.03
30.801	24.49	35.94	48.11	96.36	86.24	185.95	56.04	61.41	-4.13	5.5	-12.25	-4.98	-37.49	21.89	-1.61	1.33
31.501	25.09	32.62	46.07	97.33	70.28	179.74	57.69	64.25	-3.53	2.18	-14.29	-4.01	-53.45	15.68	0.04	4.17
32.201	24.89	36.26	50.21	97.36	76.66	160.7	63.05	68.95	-3.73	5.82	-10.15	-3.98	-47.07	-3.36	5.4	8.87
32.903	22.1	32.29	52.64	102.06	79.31	160.46	53.44	66.01	-6.52	1.85	-7.72	0.72	-44.42	-3.6	-4.21	5.93
33.602	20.41	35.33	53.51	110.4	70.33	172.83	57.65	72.17	-8.21	4.89	-6.85	9.06	-53.4	8.77	0	12.09
34.304	26.59	42.21	56.25	111.45	74.28	164.51	58.56	61.12	-2.03	11.77	-4.11	10.11	-49.45	0.45	0.91	1.04
35.003	23.86	33.69	64.87	116.75	78.34	166.86	49.55	62.48	-4.76	3.25	4.51	15.41	-45.39	2.8	-8.1	2.4
35.704	23.93	30.12	51.5	120.04	74.78	187.36	58.81	62.38	-4.69	-0.32	-8.86	18.7	-48.95	23.3	1.16	2.3
36.402	21.52	32.88	54.43	129.74	69.89	205.11	56.87	63.84	-7.1	2.44	-5.93	28.4	-53.84	41.05	-0.78	3.76
37.103	22.47	33.11	51.74	126.04	76.94	214.43	58.28	66.56	-6.15	2.67	-8.62	24.7	-46.79	50.37	0.63	6.48
37.804	24.2	29.88	51.12	145.05	79.71	223.77	60.68	63.46	-4.42	-0.56	-9.24	43.71	-44.02	59.71	3.03	3.38
38.503	22.27	31.96	48.93	144.93	78.64	211.48	70.15	62.57	-6.35	1.52	-11.43	43.59	-45.09	47.42	12.5	2.49
39.204	25.83	32.37	51.51	145.33	85.12	215.19	60.27	71.23	-2.79	1.93	-8.85	43.99	-38.61	51.13	2.62	11.15
39.903	24.22	30.92	57.87	142.88	84.2	217.74	55.68	66.79	-4.4	0.48	-2.49	41.54	-39.53	53.68	-1.97	6.71
40.604	21.77	29.02	48.7	140.14	80.75	196.14	47.63	72.76	-6.85	-1.42	-11.66	38.8	-42.98	32.08	-10.02	12.68
41.303	21.37	32.72	52.65	148.42	72.02	189.02	63.69	61.31	-7.25	2.28	-7.71	47.08	-51.71	24.96	6.04	1.23
42.003	24.49	35.32	55.9	141.34	78.61	182.66	58.77	69.54	-4.13	4.88	-4.46	40	-45.12	18.6	1.12	9.46
42.703	27.79	31.43	53.5	135.92	71.74	184.6	52.91	56.37	-0.83	0.99	-6.86	34.58	-51.99	20.54	-4.74	-3.71
43.403	20.7	32.82	49.59	127.33	80.55	190	59.63	60.88	-7.92	2.38	-10.77	25.99	-43.18	25.94	1.98	0.8
44.104	22.17	34.76	51.28	127.61	82.24	194.49	63.48	68.74	-6.45	4.32	-9.08	26.27	-41.49	30.43	5.83	8.66
44.803	21.59	34.79	50.39	117.37	71.18	186.95	54.47	67.62	-7.03	4.35	-9.97	16.03	-52.55	22.89	-3.18	7.54
45.504	28.65	29.1	53.02	117.75	79.95	192.59	65.25	69.71	0.03	-1.34	-7.34	16.41	-43.78	28.53	7.6	9.63
46.204	26.4	35.15	50.13	106.17	78.95	197.22	68.73	73.26	-2.22	4.71	-10.23	4.83	-44.78	33.16	11.08	13.18
46.904	23.92	34.68	63.82	105.62	76.21	206.46	59.12	73.2	-4.7	4.24	3.46	4.28	-47.52	42.4	1.47	13.12
47.604	21.49	31.68	57.34	112.08	75.51	192.94	51.37	67.89	-7.13	1.24	-3.02	10.74	-48.22	28.88	-6.28	7.81
48.302	28.23	29.85	51	115.98	84.98	173.84	63.37	66.3	-0.39	-0.59	-9.36	14.64	-38.75	9.78	5.72	6.22
49.004	24.3	33.42	57.9	102.68	87.09	200.8	56.27	66.33	-4.32	2.98	-2.46	1.34	-36.64	36.74	-1.38	6.25
49.702	20.43	33.07	55.51	91.79	87.74	225.64	57.19	67.78	-8.19	2.63	-4.85	-9.55	-35.99	61.58	-0.46	7.7
50.403	23.51	31.91	51.36	106.74	81.17	199.72	58.35	63.9	-5.11	1.47	-9	5.4	-42.56	35.66	0.7	3.82
51.103	23.26	35.49	55.61	103.71	78.15	203.85	51.37	67.49	-5.36	5.05	-4.75	2.37	-45.58	39.79	-6.28	7.41
51.803	21.84	30.48	50.33	105.63	75.97	202.43	61.2	58.27	-6.78	0.04	-10.03	4.29	-47.76	38.37	3.55	-1.81
52.504	23.3	32.46	53.44	97.51	71.91	192.96	56.52	63.74	-5.32	2.02	-6.92	-3.83	-51.82	28.9	-1.13	3.66
53.204	24.32	33.69	55.28	96.7	78.56	204.92	73.83	67.65	-4.3	3.25	-5.08	-4.64	-45.17	40.86	16.18	7.57
53.904	90.92	57.06	236.92	156.35	155.95	304.18	273.44	142.65	62.3	26.62	176.56	55.01	32.22	140.12	215.79	82.57
54.603	167.47	80.02	291.52	286.64	243.41	382.43	331.77	212.17	138.85	49.58	231.16	185.3	119.68	218.37	274.12	152.09
55.303	162.09	64.04	248.99	395.35	273.74	425.83	286.31	190.43	133.47	33.6	188.63	294.01	150.01	261.77	228.66	130.35
56.002	177.01	79.45	288.15	522.03	323.15	455.41	381.2	222.2	148.39	49.01	227.79	420.69	199.42	291.35	323.55	162.12
56.703	185.02	85.52	297.85	562.08	340.07	466.37	441.59	242.95	156.4	55.08	237.49	460.74	216.34	302.31	383.94	182.87
57.402	171.39	76.53	291.61	620.7	382.1	461.29	436.19	272.25	142.77	46.09	231.25	519.36	258.37	297.23	378.54	212.17
58.103	150.94	81.93	273.58	646.63	405.41	461.1	445.55	293.19	122.32	51.49	213.22	545.29	281.68	297.04	387.9	233.11
58.803	136.66	83.49	256.87	654.38	404.22	418.54	415.04	319.65	108.04	53.05	196.51	553.04	280.49	254.48	357.39	259.57
59.502	126.33	85.94	239.43	628.13	376.41	424.54	395.39	340.65	97.71	55.5	179.07	526.79	252.68	260.48	337.74	280.57
60.202	100.14	73.06	173.59	609.9	329.15	403.84	290.73	319.56	71.52	42.62	113.23	508.56	205.42	239.78	233.08	259.48
60.903	47.51	57.26	99.03	531.88	280.66	386.47	211.09	295.87	18.89	26.82	38.67	430.54	156.93	222.41	153.44	235.79
61.604	36.3	41.27	77.69	468.95	245.15	377.79	154.57	232.99	7.68	10.83	17.33	367.61	121.42	213.73	96.92	172.91
62.302	30.05	42.45	55.74	389.32	217.8	363.87	99.65	161.92	1.43	12.01	-4.62	287.98	94.07	199.81	42	101.84
63.002	27.34	40.92	58.12	336.4	181.71	337.38	72.75	148.59	-1.28	10.48	-2.24	235.06	57.98	173.32	15.1	88.51
63.704	22.76	35.32	55.94	306.82	157.24	313.41	71.33	118.48	-5.86	4.88	-4.42	205.48	33.51	149.35	13.68	58.4
64.403	21.78	31.11	48.02	278.3	148.82	275.68	54.96	103.77	-6.84	0.67	-12.34	176.96	25.09	111.62	-2.69	43.69
65.105	23	31.65	54.11	255.18	147.15	251.6	65.03	88.62	-5.62	1.21	-6.25	153.84	23.42	87.54	7.38	28.54
65.803	23.18	36.6	53.39	232.17	152.78	235.23	57.68	98.62	-5.44	6.16	-6.97	130.83	29.05	71.17	0.03	38.54
66.504	25.57	32.7	49.19	211.96	151.42	209.18	71.43	80.72	-3.05	2.26	-11.17	110.62	27.69	45.12	13.78	20.64
67.204	24.94	34.62	45.43	186.91	126.07	198.47	53.07	78.91	-3.68	4.18	-14.93	85.57	2.34	34.41	-4.58	18.83
67.904	30.65	27.15	53.25	170.78	108.92	192.24	67.84	84.73	2.03	-3.29	-7.11	69.44	-14.81	28.18	10.19	24.65
68.604	20.48	32.18	55.32	170.49	94.97	177.93	69.81	72.11	-8.14	1.74	-5.04	69.15	-28.76	13.87	12.16	12.03
69.304	24.31	32.14	50.43	162.99	80.61	163.85	54.13	73.39	-4.31	1.7	-9.93	61.65	-43.12	-0.21	-3.52	13.31
70.003	25.6	37.51	49.57	155.7	75.8	158.76	65.87	73.14	-3.02	7.07	-10.79	54.36	-47.93	-5.3	8.22	13.06
70.703	20.76	32.48	56.02	146.6	68.35	156.93	58.25	68.05	-7.86	2.04	-4.34	45.26	-55.38	-7.13	0.6	7.97
71.402	25.38	35.96	54.56	150.57	71.32	147.57	60.79	74.86	-3.24	5.52	-5.8	49.23	-52.41	-16.49	3.14	14.78
72.104	19.24	31.5	58.43	138.42	62.53	141.75	66.59	68.89	-9.38	1.06	-1.93	37.08	-61.2	-22.31	8.94	8.81
72.803	28.18	37.27	50.43	137.56	58.65	146.11	69.87	75.94	-0.44	6.83	-9.93	36.22	-65.08	-17.95	12.22	15.86
73.503	26.35	36.81	48.88	126.55	63.68	149.65	66.85	85.44	-2.27	6.37	-11.48	25.21	-60.05	-14.41	9.2	25.36
74.203	24.83	36.99	54.83	112.45	56.34	164.29	63.01	82.37	-3.79	6.55	-5.53	11.11	-67.39	0.23	5.36	22.29
74.902	21.98	31.82	51.45	110	56.55	156.61	61.05	76.66	-6.64	1.38	-8.91	8.66	-67.18	-7.45	3.4	16.58
75.603	22.39	37.46	49.14	110.71	49.74	151.2	64.51	70.11	-6.23	7.02	-11.22	9.37	-73.99	-12.86	6.86	10.03
76.304	26.69	39.52	69.01	123.87	51.68	136.86	60.13	83.53	-1.93	9.08	8.65	22.53	-72.05	-27.2	2.48	23.45
77.001	19.44	38	66.03	120.92	56.06	135.72	62.21	87.05	-9.18	7.56	5.67	19.58	-67.67	-28.34	4.56	26.97
77.703	28.38	37.38	67.8	113.19	70.5	157.29	86.77	94.4	-0.24	6.94	7.44	11.85	-53.23	-6.77	29.12	34.32
78.404	114.16	74.99	233.21	212.1	126.06	270.01	288.85	212.67	85.54	44.55	172.85	110.76	2.33	105.95	231.2	152.59
79.102	174.79	74.19	261.32	254.74	151.46	329.45	279.59	250.87	146.17	43.75	200.96	153.4	27.73	165.39	221.94	190.79
79.804	166.76	74.85	241.57	282.75	179.74	352.86	301.41	233.47	138.14	44.41	181.21	181.41	56.01	188.8	243.76	173.39
80.503	186.34	81.6	295.57	347.44	216.17	380.75	384.41	265.28	157.72	51.16	235.21	246.1	92.44	216.69	326.76	205.2
81.202	170.67	86.3	287.56	378.77	231	403.46	415.13	267.02	142.05	55.86	227.2	277.43	107.27	239.4	357.48	206.94
81.903	122.22	63.97	228.31	376.91	225.22	380.69	389.56	276.94	93.6	33.53	167.95	275.57	101.49	216.63	331.91	216.86
82.603	59.01	51.84	163.71	331.31	207.67	354.93	250.32	270.37	30.39	21.4	103.35	229.97	83.94	190.87	192.67	210.29
83.304	35.71	40.77	103.74	308.92	188.65	342.91	186.56	201.75	7.09	10.33	43.38	207.58	64.92	178.85	128.91	141.67
84.002	26.29	33.92	78.37	273.87	183.96	302.75	134.71	162.16	-2.33	3.48	18.01	172.53	60.23	138.69	77.06	102.08
84.702	22.53	40.96	58.94	243.21	159.46	281.43	89.37	122.87	-6.09	10.52	-1.42	141.87	35.73	117.37	31.72	62.79
85.403	24.45	36.36	54.94	218.64	150.39	254.9	87.47	128.23	-4.17	5.92	-5.42	117.3	26.66	90.84	29.82	68.15
86.103	23.46	37.28	53.49	196.18	135.85	226.15	60.47	97.53	-5.16	6.84	-6.87	94.84	12.12	62.09	2.82	37.45
86.803	25.44	31.94	49.76	172.82	120.49	207.77	57.52	91.51	-3.18	1.5	-10.6	71.48	-3.24	43.71	-0.13	31.43
87.502	25.41	31.92	55.12	168.88	118.52	173.15	63.88	85.79	-3.21	1.48	-5.24	67.54	-5.21	9.09	6.23	25.71
88.202	21.42	32.22	48.2	159.15	93.73	158.67	72.69	74.88	-7.2	1.78	-12.16	57.81	-30	-5.39	15.04	14.8
88.905	25.37	37.15	54.39	144.94	88.74	151	56.83	79.37	-3.25	6.71	-5.97	43.6	-34.99	-13.06	-0.82	19.29
89.603	24.53	35.95	48.75	136.93	84.32	133.69	62.44	76.71	-4.09	5.51	-11.61	35.59	-39.41	-30.37	4.79	16.63
90.303	25.06	34.68	52.8	133.75	88.45	129.26	56.49	83.49	-3.56	4.24	-7.56	32.41	-35.28	-34.8	-1.16	23.41
91.005	23.71	37.53	53.3	128.17	86.24	125.85	68.52	90.28	-4.91	7.09	-7.06	26.83	-37.49	-38.21	10.87	30.2
91.703	29.87	36.48	51.04	127.44	74.04	123.86	54.12	81.35	1.25	6.04	-9.32	26.1	-49.69	-40.2	-3.53	21.27
92.402	24.93	38.14	51.13	113.55	69.05	110.44	58.52	78.21	-3.69	7.7	-9.23	12.21	-54.68	-53.62	0.87	18.13
93.102	23.99	39.92	54.51	111.25	68.94	112.9	72.51	72.75	-4.63	9.48	-5.85	9.91	-54.79	-51.16	14.86	12.67
93.803	25.66	39.48	67.49	111.73	72.75	121.29	53.48	79.28	-2.96	9.04	7.13	10.39	-50.98	-42.77	-4.17	19.2
94.502	28.42	42.54	69.43	111.39	63.14	116.28	73.45	81.37	-0.2	12.1	9.07	10.05	-60.59	-47.78	15.8	21.29
95.202	30.12	40.1	74.33	102.81	65.85	110.27	55.55	90.76	1.5	9.66	13.97	1.47	-57.88	-53.79	-2.1	30.68
95.902	30.78	36.93	91.3	105.48	65.78	106.67	63.49	82.01	2.16	6.49	30.94	4.14	-57.95	-57.39	5.84	21.93
96.602	27.87	38.09	78.07	102.03	62.89	110.52	71.01	91.88	-0.75	7.65	17.71	0.69	-60.84	-53.54	13.36	31.8
97.302	25.41	37.46	62.75	103.79	65.39	112.78	63.19	69.82	-3.21	7.02	2.39	2.45	-58.34	-51.28	5.54	9.74
98.002	22.17	41.14	53.26	104.62	56.32	116.95	58.35	85.78	-6.45	10.7	-7.1	3.28	-67.41	-47.11	0.7	25.7
98.702	26.6	42.83	61.67	105.09	59.32	122.58	61.68	77.86	-2.02	12.39	1.31	3.75	-64.41	-41.48	4.03	17.78
99.403	24.43	38.14	62.41	104.37	60.71	118.22	61.95	91.68	-4.19	7.7	2.05	3.03	-63.02	-45.84	4.3	31.6
100.104	21.64	35.33	53.03	103.91	60.76	122.88	62.2	78.32	-6.98	4.89	-7.33	2.57	-62.97	-41.18	4.55	18.24
100.803	23.97	36.46	54.49	108.13	58.03	122.5	71.17	74.92	-4.65	6.02	-5.87	6.79	-65.7	-41.56	13.52	14.84
101.502	27.89	35.09	68.87	105.56	69.59	124.02	79.31	89.55	-0.73	4.65	8.51	4.22	-54.14	-40.04	21.66	29.47
102.204	29.28	37.52	76.28	108.55	79.55	144.2	88.36	87.12	0.66	7.08	15.92	7.21	-44.18	-19.86	30.71	27.04
102.903	27.86	36.57	72.86	114.76	76.34	139.75	90.08	95.71	-0.76	6.13	12.5	13.42	-47.39	-24.31	32.43	35.63
103.603	27.94	42	66.17	110.74	73.34	165.13	77.91	96.11	-0.68	11.56	5.81	9.4	-50.39	1.07	20.26	36.03
104.304	38.44	34.04	55.07	103.2	70.46	152.69	72.27	98.74	9.82	3.6	-5.29	1.86	-53.27	-11.37	14.62	38.66
105.003	38.11	36.42	57.47	103.66	63.27	147.95	57.63	94.75	9.49	5.98	-2.89	2.32	-60.46	-16.11	-0.02	34.67
105.704	32.61	32.76	55.51	97.15	58.81	140.06	65.68	87.11	3.99	2.32	-4.85	-4.19	-64.92	-24	8.03	27.03
106.404	26.73	38.13	50.52	99.68	62.96	143.69	72.65	86.34	-1.89	7.69	-9.84	-1.66	-60.77	-20.37	15	26.26
107.104	23.11	34.43	50.45	97.98	60.2	138.54	71.96	89.38	-5.51	3.99	-9.91	-3.36	-63.53	-25.52	14.31	29.3
107.803	27.48	41.12	53.67	101.33	51.98	134.31	62.65	74.44	-1.14	10.68	-6.69	-0.01	-71.75	-29.75	5	14.36
108.504	27.79	37.02	50.27	99.99	57.6	132.13	47.63	89.23	-0.83	6.58	-10.09	-1.35	-66.13	-31.93	-10.02	29.15
109.205	27.68	35.6	55.77	96.13	57.52	119.44	67.88	88.89	-0.94	5.16	-4.59	-5.21	-66.21	-44.62	10.23	28.81
109.904	22.64	32.45	46.09	100.05	59.01	126.15	63.43	77.75	-5.98	2.01	-14.27	-1.29	-64.72	-37.91	5.78	17.67
110.605	25.45	39.79	49.1	99.13	60.56	137.9	61.57	74.21	-3.17	9.35	-11.26	-2.21	-63.17	-26.16	3.92	14.13
111.305	23.26	41.06	59.31	96.77	55.6	141.01	77.65	86.73	-5.36	10.62	-1.05	-4.57	-68.13	-23.05	20	26.65
112.003	27.39	38.09	52.64	99.46	70.36	136.04	92.76	86.66	-1.23	7.65	-7.72	-1.88	-53.37	-28.02	35.11	26.58
112.703	25.74	40.89	58.45	93.26	70.97	140.87	80.28	90.38	-2.88	10.45	-1.91	-8.08	-52.76	-23.19	22.63	30.3
113.403	28.63	37.36	57.77	99.2	63.09	146.55	78.16	86.78	0.01	6.92	-2.59	-2.14	-60.64	-17.51	20.51	26.7
114.102	26.36	34.18	68.48	94.01	71.18	152.45	67.88	89.59	-2.26	3.74	8.12	-7.33	-52.55	-11.61	10.23	29.51
114.802	24.54	33.26	62.74	98.49	75.76	151.26	66.51	102.05	-4.08	2.82	2.38	-2.85	-47.97	-12.8	8.86	41.97
115.504	28.01	36.17	63.63	96.47	79.33	159.91	75.08	81.04	-0.61	5.73	3.27	-4.87	-44.4	-4.15	17.43	20.96
116.203	22.46	36.75	70.45	91.74	90.28	144.98	65.29	78.98	-6.16	6.31	10.09	-9.6	-33.45	-19.08	7.64	18.9
116.903	23.65	37.27	56.96	97.35	77.74	150.49	66.07	77.32	-4.97	6.83	-3.4	-3.99	-45.99	-13.57	8.42	17.24
117.603	25.04	34.01	70.12	95.27	72.24	146.04	62.15	85.04	-3.58	3.57	9.76	-6.07	-51.49	-18.02	4.5	24.96
118.303	23.84	36.09	58.15	92.99	71.33	154.78	81.13	80.22	-4.78	5.65	-2.21	-8.35	-52.4	-9.28	23.48	20.14
119.003	27.54	35.24	66.36	100.09	78.4	158.88	71.91	72.96	-1.08	4.8	6	-1.25	-45.33	-5.18	14.26	12.88
119.703	21.89	38.08	70.78	104.28	70.53	175.89	68.8	84.86	-6.73	7.64	10.42	2.94	-53.2	11.83	11.15	24.78
120.403	57.98	51.13	182.09	118.95	110.06	228.52	184.69	129.93	29.36	20.69	121.73	17.61	-13.67	64.46	127.04	69.85
121.103	164.34	76.19	284.14	241.02	128.03	336.56	313.87	237.38	135.72	45.75	223.78	139.68	4.3	172.5	256.22	177.3
121.802	166.84	73.12	252.26	285.87	135.53	378.85	296.49	224.55	138.22	42.68	191.9	184.53	11.8	214.79	238.84	164.47
122.502	173.1	73.88	293.87	345.01	164.32	387.3	379.93	231.73	144.48	43.44	233.51	243.67	40.59	223.24	322.28	171.65
123.202	193.85	85.33	323.06	424.35	225.29	413.48	416.12	259.2	165.23	54.89	262.7	323.01	101.56	249.42	358.47	199.12
123.904	171.7	78.65	318.98	464.78	257.83	433.19	419.4	255.71	143.08	48.21	258.62	363.44	134.1	269.13	361.75	195.63
124.604	146.87	83.22	314.11	503.76	270.04	403.98	419.31	289.39	118.25	52.78	253.75	402.42	146.31	239.92	361.66	229.31
125.303	126.12	76.16	275.67	522.07	262.86	401.11	381.23	288.52	97.5	45.72	215.31	420.73	139.13	237.05	323.58	228.44
126.002	66.27	62.74	189.05	489.16	271.24	360.92	258.45	294.53	37.65	32.3	128.69	387.82	147.51	196.86	200.8	234.45
126.705	37.92	51.11	124.71	446.79	245.13	333.28	177.97	238.27	9.3	20.67	64.35	345.45	121.4	169.22	120.32	178.19
127.403	32.93	43.77	92.78	410.2	214.15	309.88	133.17	187.37	4.31	13.33	32.42	308.86	90.42	145.82	75.52	127.29
128.105	26.31	38.63	69.69	400	183.79	279.63	97.61	148.77	-2.31	8.19	9.33	298.66	60.06	115.57	39.96	88.69
128.803	27.49	40.38	52.96	356.62	147.22	259.25	74.39	114.8	-1.13	9.94	-7.4	255.28	23.49	95.19	16.74	54.72
129.504	26.2	37.38	51.2	320.96	143.37	226.42	77.41	101.95	-2.42	6.94	-9.16	219.62	19.64	62.36	19.76	41.87
130.204	23.47	38.45	54.05	301.03	118.72	208.84	49.64	88.25	-5.15	8.01	-6.31	199.69	-5.01	44.78	-8.01	28.17
130.903	25.53	34.02	50.38	258.69	117.75	184.6	64	95.8	-3.09	3.58	-9.98	157.35	-5.98	20.54	6.35	35.72
131.603	21.93	41.48	54.49	234.1	111.15	187.6	68.61	81.53	-6.69	11.04	-5.87	132.76	-12.58	23.54	10.96	21.45
132.304	27.44	33.62	61.16	216.91	106.38	173.69	68.47	84.56	-1.18	3.18	0.8	115.57	-17.35	9.63	10.82	24.48
133.004	26.44	36.32	55.3	208.46	96.19	170.19	69.32	73.29	-2.18	5.88	-5.06	107.12	-27.54	6.13	11.67	13.21
133.704	23.49	34.59	50.25	193.47	87.34	154.35	60.75	85.62	-5.13	4.15	-10.11	92.13	-36.39	-9.71	3.1	25.54
134.404	27.68	37.94	56.24	177.73	80.5	136.2	72.69	79.5	-0.94	7.5	-4.12	76.39	-43.23	-27.86	15.04	19.42
135.103	28.24	39.64	64.25	153.18	75.32	121.33	70.95	68.33	-0.38	9.2	3.89	51.84	-48.41	-42.73	13.3	8.25
135.803	20.43	35.15	56.64	151.38	74.73	117.36	57.29	82.07	-8.19	4.71	-3.72	50.04	-49	-46.7	-0.36	21.99
136.504	24.21	36.16	60.04	144.39	66.68	108.54	66.76	86.91	-4.41	5.72	-0.32	43.05	-57.05	-55.52	9.11	26.83
137.203	26	32.44	57.43	138.8	56.44	102.96	65.28	75.59	-2.62	2	-2.93	37.46	-67.29	-61.1	7.63	15.51
137.902	23.57	34.59	54.36	131.21	55.71	96.63	62.96	82.13	-5.05	4.15	-6	29.87	-68.02	-67.43	5.31	22.05
138.602	22.42	37	57.35	125.91	66.61	101.58	57.87	68.73	-6.2	6.56	-3.01	24.57	-57.12	-62.48	0.22	8.65
139.302	23.3	37.03	60.13	120.34	59.04	101.16	58.28	84.23	-5.32	6.59	-0.23	19	-64.69	-62.9	0.63	24.15
140.002	27.76	34.5	58.57	116.1	57	107.67	73.51	86.71	-0.86	4.06	-1.79	14.76	-66.73	-56.39	15.86	26.63
140.702	24.88	38.48	55.45	111.23	50.94	107.35	60.83	83.91	-3.74	8.04	-4.91	9.89	-72.79	-56.71	3.18	23.83
141.403	23.8	37.91	58.3	117.49	53.14	107.53	69.65	82.74	-4.82	7.47	-2.06	16.15	-70.59	-56.53	12	22.66
142.102	24.61	36.19	58.52	110.25	61.43	115.27	51.55	90.26	-4.01	5.75	-1.84	8.91	-62.3	-48.79	-6.1	30.18
142.803	22.68	33.21	66.19	109.4	56.58	121.66	56.96	80.46	-5.94	2.77	5.83	8.06	-67.15	-42.4	-0.69	20.38
143.504	26.79	40.85	104.57	112.33	67.95	142.5	79.61	97.29	-1.83	10.41	44.21	10.99	-55.78	-21.56	21.96	37.21
144.204	127.79	65.78	252.06	205.24	137.37	238.5	262.8	188.44	99.17	35.34	191.7	103.9	13.64	74.44	205.15	128.36
144.902	177.48	79.54	278.3	245.76	142.02	293.46	273.25	250.29	148.86	49.1	217.94	144.42	18.29	129.4	215.6	190.21
145.602	166.43	67.08	223.62	264.91	170.03	297.51	247.67	224.99	137.81	36.64	163.26	163.57	46.3	133.45	190.02	164.91
146.303	141.35	70.57	251.43	287.89	198.12	321.59	250.67	265.1	112.73	40.13	191.07	186.55	74.39	157.53	193.02	205.02
147.003	167.65	87.42	289.72	373.8	214.86	326.98	325.85	296.8	139.03	56.98	229.36	272.46	91.13	162.92	268.2	236.72
147.703	132.09	63.31	208.2	392.1	223.13	294.86	253	289.79	103.47	32.87	147.84	290.76	99.4	130.8	195.35	229.71
148.402	74.35	53.65	143.92	365.83	199.07	264.67	161.23	280.2	45.73	23.21	83.56	264.49	75.34	100.61	103.58	220.12
149.104	37.33	43.11	99.33	337.64	187.02	270.87	138.44	206.96	8.71	12.67	38.97	236.3	63.29	106.81	80.79	146.88
149.802	26.55	37.31	76.45	277.24	174.54	258.14	105.32	178.36	-2.07	6.87	16.09	175.9	50.81	94.08	47.67	118.28
150.504	22.45	41.36	60.37	254.24	156.96	251.85	90.24	139	-6.17	10.92	0.01	152.9	33.23	87.79	32.59	78.92
151.203	25.65	37	51.39	223.91	136.09	234.6	66.76	132.81	-2.97	6.56	-8.97	122.57	12.36	70.54	9.11	72.73
151.903	20.78	38.43	56.91	217.02	129.48	213.04	58.71	107.26	-7.84	7.99	-3.45	115.68	5.75	48.98	1.06	47.18
152.603	26.24	36.74	51.87	196.77	122.6	202.01	61.59	107.47	-2.38	6.3	-8.49	95.43	-1.13	37.95	3.94	47.39
153.302	24.12	37.72	51.89	184.57	122.82	177.53	72.35	89.49	-4.5	7.28	-8.47	83.23	-0.91	13.47	14.7	29.41
154.002	21.66	35.78	49.99	161.6	111.74	177.66	60.36	83.26	-6.96	5.34	-10.37	60.26	-11.99	13.6	2.71	23.18
154.704	20.51	35.72	49.16	150	97.82	156.47	55.19	83.6	-8.11	5.28	-11.2	48.66	-25.91	-7.59	-2.46	23.52
155.404	22.24	34.67	53.91	141.44	88.14	151.52	54.08	80.12	-6.38	4.23	-6.45	40.1	-35.59	-12.54	-3.57	20.04
156.102	21.68	36.03	50.7	134.22	85.27	145.7	60.55	87.79	-6.94	5.59	-9.66	32.88	-38.46	-18.36	2.9	27.71
156.798	21.3	38.81	51.93	126.41	80.02	149.94	53.64	89.73	-7.32	8.37	-8.43	25.07	-43.71	-14.12	-4.01	29.65
157.502	20.68	43.43	52.83	125.53	90.27	168.97	60.47	94.63	-7.94	12.99	-7.53	24.19	-33.46	4.91	2.82	34.55
158.198	24.22	41.1	55.48	123.82	86.62	157.27	65.52	87.2	-4.4	10.66	-4.88	22.48	-37.11	-6.79	7.87	27.12
158.903	22.55	39.38	61.72	122.64	82.73	160.71	50.89	78.93	-6.07	8.94	1.36	21.3	-41	-3.35	-6.76	18.85
159.602	21.42	42.22	57.85	128.65	75.05	153.99	54.73	87.26	-7.2	11.78	-2.51	27.31	-48.68	-10.07	-2.92	27.18
160.302	22.98	39.06	53.77	120.99	73.32	142.98	51.04	75.2	-5.64	8.62	-6.59	19.65	-50.41	-21.08	-6.61	15.12
161.004	23.54	34.64	54.63	115.86	67.8	129.13	53.09	79.45	-5.08	4.2	-5.73	14.52	-55.93	-34.93	-4.56	19.37
161.702	23.98	32.6	51.3	119.12	68.4	136.64	59.13	92.16	-4.64	2.16	-9.06	17.78	-55.33	-27.42	1.48	32.08
162.403	21.15	35.62	52.23	112.32	61.1	131.44	57.63	83.94	-7.47	5.18	-8.13	10.98	-62.63	-32.62	-0.02	23.86
163.103	22.38	36.3	61.71	114.33	54.44	129.05	53.37	87.74	-6.24	5.86	1.35	12.99	-69.29	-35.01	-4.28	27.66
163.802	23.37	32.38	58.47	116.7	52.02	127.84	61.76	72.8	-5.25	1.94	-1.89	15.36	-71.71	-36.22	4.11	12.72
164.502	21.81	34.56	55.58	115.09	52.24	126.86	66.8	82.31	-6.81	4.12	-4.78	13.75	-71.49	-37.2	9.15	22.23
165.203	27.46	36.17	46.04	109.06	47.34	114.14	68.71	89.65	-1.16	5.73	-14.32	7.72	-76.39	-49.92	11.06	29.57
165.902	21.02	36.35	55.36	112.25	54.97	115.92	89.59	95.23	-7.6	5.91	-5	10.91	-68.76	-48.14	31.94	35.15
166.604	23.49	34.12	50.98	110.44	49.44	102.83	58.73	88.68	-5.13	3.68	-9.38	9.1	-74.29	-61.23	1.08	28.6
167.304	19.15	37.86	55.76	109.08	57.8	105.81	72.69	82.8	-9.47	7.42	-4.6	7.74	-65.93	-58.25	15.04	22.72
168.004	24.54	37.97	50.27	110.9	51.86	98.73	70.85	83.43	-4.08	7.53	-10.09	9.56	-71.87	-65.33	13.2	23.35
168.704	26.53	37.04	53.39	107.48	58.13	97.28	57.16	91.24	-2.09	6.6	-6.97	6.14	-65.6	-66.78	-0.49	31.16
169.403	25.12	33.25	57.75	107.08	56.09	90.25	62.48	85.03	-3.5	2.81	-2.61	5.74	-67.64	-73.81	4.83	24.95
170.103	30.14	40.16	56.96	108.65	55.46	87.51	66.35	81.35	1.52	9.72	-3.4	7.31	-68.27	-76.55	8.7	21.27
170.804	21.89	36.94	52.34	102.42	57.79	98.03	59.43	95.55	-6.73	6.5	-8.02	1.08	-65.94	-66.03	1.78	35.47
171.504	26.67	39.16	62.73	113.1	55.53	94.34	52.76	82.61	-1.95	8.72	2.37	11.76	-68.2	-69.72	-4.89	22.53
172.204	24.54	33.48	54.82	101.75	56.75	87.81	59.71	74.33	-4.08	3.04	-5.54	0.41	-66.98	-76.25	2.06	14.25
172.904	23.37	39.06	56.7	109.73	58.09	101.81	54.63	74.7	-5.25	8.62	-3.66	8.39	-65.64	-62.25	-3.02	14.62
173.604	24.33	42.42	69.96	111.48	57.41	105.93	70.12	77.47	-4.29	11.98	9.6	10.14	-66.32	-58.13	12.47	17.39
174.305	23.01	36.71	62.52	116.81	51.83	99.51	64.15	82.39	-5.61	6.27	2.16	15.47	-71.9	-64.55	6.5	22.31
175.003	21.62	36.03	50.08	114.07	58.32	97.96	64.8	71.97	-7	5.59	-10.28	12.73	-65.41	-66.1	7.15	11.89
175.704	22.43	37.87	55.02	110.74	61.28	104.27	66.2	84.22	-6.19	7.43	-5.34	9.4	-62.45	-59.79	8.55	24.14
176.404	26.01	40.25	56.34	116.34	62.14	109.99	58.07	90.13	-2.61	9.81	-4.02	15	-61.59	-54.07	0.42	30.05
177.104	24.33	39.87	54.01	126.97	55.47	115.34	77.52	75.45	-4.29	9.43	-6.35	25.63	-68.26	-48.72	19.87	15.37
177.802	20.91	44.91	60.69	128.2	61.12	130.75	83.53	100.87	-7.71	14.47	0.33	26.86	-62.61	-33.31	25.88	40.79
178.502	26.88	44.94	61.49	128.55	54.65	129.87	65.91	84.69	-1.74	14.5	1.13	27.21	-69.08	-34.19	8.26	24.61
179.202	24.35	36.88	60.21	115.63	59.89	138.4	74.39	82.77	-4.27	6.44	-0.15	14.29	-63.84	-25.66	16.74	22.69
179.903	23.7	36.91	64.16	119.23	57.6	130.69	72.72	91.68	-4.92	6.47	3.8	17.89	-66.13	-33.37	15.07	31.6
180.603	24.66	38.99	59.63	117.91	59.14	120.28	70.11	87.74	-3.96	8.55	-0.73	16.57	-64.59	-43.78	12.46	27.66
181.302	24.8	36.79	56.87	118.63	56.97	107.76	56.15	84.28	-3.82	6.35	-3.49	17.29	-66.76	-56.3	-1.5	24.2
182.002	23.84	36.03	62.13	111.08	60.35	104.95	61.16	79.48	-4.78	5.59	1.77	9.74	-63.38	-59.11	3.51	19.4
182.703	24.62	37.67	52.42	114.97	57	111.7	75.45	78.44	-4	7.23	-7.94	13.63	-66.73	-52.36	17.8	18.36
183.402	22.77	36.22	54.4	116.85	58.08	119.23	77.83	88.45	-5.85	5.78	-5.96	15.51	-65.65	-44.83	20.18	28.37
184.104	24.8	36.65	58.39	122.16	54.83	120.99	58.91	84.34	-3.82	6.21	-1.97	20.82	-68.9	-43.07	1.26	24.26
184.803	20.05	43.23	54.96	122.44	54.47	127.24	64.57	86.14	-8.57	12.79	-5.4	21.1	-69.26	-36.82	6.92	26.06
185.503	24.3	35.62	56.52	119.28	56.99	117.49	62.15	87.5	-4.32	5.18	-3.84	17.94	-66.74	-46.57	4.5	27.42
186.204	23.17	32.98	50.05	127.39	51.17	116.94	60.52	77.34	-5.45	2.54	-10.31	26.05	-72.56	-47.12	2.87	17.26
186.903	25.43	36.81	52.56	132.5	52.42	157.66	63.05	80.24	-3.19	6.37	-7.8	31.16	-71.31	-6.4	5.4	20.16
187.605	24.68	34.08	49.86	130.03	55.83	142.88	64.25	75.74	-3.94	3.64	-10.5	28.69	-67.9	-21.18	6.6	15.66
188.303	26.54	37.15	50.92	116.46	54.67	126.55	62.91	69.17	-2.08	6.71	-9.44	15.12	-69.06	-37.51	5.26	9.09
189.002	28.14	37.64	55.39	111.11	56.41	119.49	58.85	69.17	-0.48	7.2	-4.97	9.77	-67.32	-44.57	1.2	9.09
189.702	30.08	38.83	58.76	112.61	61.31	116.26	67.31	77.58	1.46	8.39	-1.6	11.27	-62.42	-47.8	9.66	17.5
190.402	26.22	33.49	57.52	111.38	61.08	142.17	49.33	78.46	-2.4	3.05	-2.84	10.04	-62.65	-21.89	-8.32	18.38
191.102	23.94	37.63	59.67	104.37	62.71	138.13	48.71	67.8	-4.68	7.19	-0.69	3.03	-61.02	-25.93	-8.94	7.72
191.803	17.82	36.15	57.92	105.13	72.44	121.8	60.85	72.14	-10.8	5.71	-2.44	3.79	-51.29	-42.26	3.2	12.06
192.499	23.61	38.19	59.1	98.54	65.99	127.47	60.96	79.24	-5.01	7.75	-1.26	-2.8	-57.74	-36.59	3.31	19.16
193.203	25.54	39.14	71.05	104.97	75.66	144.55	66.85	84.02	-3.08	8.7	10.69	3.63	-48.07	-19.51	9.2	23.94
193.903	32.18	39.38	66.36	107.92	76.26	145.73	79.51	85.05	3.56	8.94	6	6.58	-47.47	-18.33	21.86	24.97
194.603	41.84	49.67	139.53	123.42	108.56	181.83	117.89	101.41	13.22	19.23	79.17	22.08	-15.17	17.77	60.24	41.33
195.304	172.92	71.29	291.7	228.01	151.86	293.2	255.04	194.38	144.3	40.85	231.34	126.67	28.13	129.14	197.39	134.3
196.003	187.97	69.38	296.56	337.67	211.79	300.4	274.95	202.08	159.35	38.94	236.2	236.33	88.06	136.34	217.3	142
196.702	181.83	79.36	292.1	474.27	282.16	327.64	263.92	214.41	153.21	48.92	231.74	372.93	158.43	163.58	206.27	154.33
197.402	189.86	83.35	299.89	581.77	299.13	323.18	318.27	241.83	161.24	52.91	239.53	480.43	175.4	159.12	260.62	181.75
198.102	168.1	72.79	300.44	622.51	305.52	323.28	335.15	278.61	139.48	42.35	240.08	521.17	181.79	159.22	277.5	218.53
198.802	142.38	73.71	288.17	657.56	285.47	305.53	317.6	263.56	113.76	43.27	227.81	556.22	161.74	141.47	259.95	203.48
199.503	84.06	65.21	195.23	643.09	253.65	282.88	230.57	282.93	55.44	34.77	134.87	541.75	129.92	118.82	172.92	222.85
200.204	49.09	52.27	135.64	605.58	239.17	269.88	193.72	298.9	20.47	21.83	75.28	504.24	115.44	105.82	136.07	238.82
200.903	35.95	48.61	97.97	550.13	216.32	240.26	155.2	243.22	7.33	18.17	37.61	448.79	92.59	76.2	97.55	183.14
201.602	30.98	38.54	77.65	501.26	190.5	254.44	104.57	205.87	2.36	8.1	17.29	399.92	66.77	90.38	46.92	145.79
202.303	30.72	40.09	69.17	453.14	176.71	237.89	92.99	169.45	2.1	9.65	8.81	351.8	52.98	73.83	35.34	109.37
203.002	31.67	45	60.88	422.89	174.02	223.75	84.12	166.6	3.05	14.56	0.52	321.55	50.29	59.69	26.47	106.52
203.702	100.79	56.41	175.44	497.63	191.56	272.93	181.24	268.65	72.17	25.97	115.08	396.29	67.83	108.87	123.59	208.57
204.402	143.45	61.68	222.74	571.44	191.37	294.6	202.28	285	114.83	31.24	162.38	470.1	67.64	130.54	144.63	224.92
205.102	163.47	73.22	235.91	618.15	233.79	308.14	246.21	276.73	134.85	42.78	175.55	516.81	110.06	144.08	188.56	216.65
205.802	159.84	70.07	234.43	626.05	241.66	292.6	232.55	298.7	131.22	39.63	174.07	524.71	117.93	128.54	174.9	238.62
206.502	115.53	62.62	201.52	608.94	249.45	263.91	220.8	295.91	86.91	32.18	141.16	507.6	125.72	99.85	163.15	235.83
207.203	73.19	54.3	163.33	568.39	228.33	233.73	182	286.77	44.57	23.86	102.97	467.05	104.6	69.67	124.35	226.69
207.904	41.62	44.97	127.03	523.09	197.29	233.77	122.83	258.35	13	14.53	66.67	421.75	73.56	69.71	65.18	198.27
208.603	36.74	40.16	102.75	476.66	169.35	214.28	102.67	223.22	8.12	9.72	42.39	375.32	45.62	50.22	45.02	163.14
209.303	30.78	39.98	84.44	420.22	156.95	191.74	81.01	183.34	2.16	9.54	24.08	318.88	33.22	27.68	23.36	123.26
210.003	24.49	35.38	62.08	362.89	136.2	188.96	79.53	148.89	-4.13	4.94	1.72	261.55	12.47	24.9	21.88	88.81
210.703	25.41	40.61	68.21	301.21	148.6	159.84	62.81	142.02	-3.21	10.17	7.85	199.87	24.87	-4.22	5.16	81.94
211.403	25.46	40.51	65.96	251.13	120.65	138.03	60.07	108.96	-3.16	10.07	5.6	149.79	-3.08	-26.03	2.42	48.88
212.103	26.87	36.78	56.84	218.2	109.52	143.31	56.8	119.86	-1.75	6.34	-3.52	116.86	-14.21	-20.75	-0.85	59.78
212.802	25.71	33.8	56.78	182.58	99.53	120.31	48.41	105.18	-2.91	3.36	-3.58	81.24	-24.2	-43.75	-9.24	45.1
213.502	23.67	37.03	67.63	162.29	95.69	118.32	63.57	92.37	-4.95	6.59	7.27	60.95	-28.04	-45.74	5.92	32.29
214.204	26.38	38.38	65.93	145.97	87.57	117.18	54.56	86.95	-2.24	7.94	5.57	44.63	-36.16	-46.88	-3.09	26.87
214.904	24.26	33.38	65.05	139.82	67.88	108.59	57.93	81.2	-4.36	2.94	4.69	38.48	-55.85	-55.47	0.28	21.12
215.604	24.33	34.8	54.79	128.57	65.6	107.15	62.8	70.08	-4.29	4.36	-5.57	27.23	-58.13	-56.91	5.15	10
216.304	24.6	40.29	60.69	119.94	67.6	110.78	70.35	77.92	-4.02	9.85	0.33	18.6	-56.13	-53.28	12.7	17.84
217.004	21.72	39.15	62.09	113.39	67.62	103.73	53.11	66.79	-6.9	8.71	1.73	12.05	-56.11	-60.33	-4.54	6.71
217.704	22.82	35.68	62.48	117.9	64.62	101.63	58	64.87	-5.8	5.24	2.12	16.56	-59.11	-62.43	0.35	4.79
218.402	24.48	34.95	60.56	109.7	61.56	99.21	53.95	74.21	-4.14	4.51	0.2	8.36	-62.17	-64.85	-3.7	14.13
219.103	20.74	44.31	74.45	104.03	61.68	87.13	75.13	69.41	-7.88	13.87	14.09	2.69	-62.05	-76.93	17.48	9.33
219.801	24.14	41.54	72.79	109.78	63.29	83.87	69.51	71.51	-4.48	11.1	12.43	8.44	-60.44	-80.19	11.86	11.43
220.503	24.01	33.12	68.43	108.05	52.55	77.01	66.76	78.15	-4.61	2.68	8.07	6.71	-71.18	-87.05	9.11	18.07
221.203	23.39	38.61	61.64	103.06	52.68	76.74	56.39	68.76	-5.23	8.17	1.28	1.72	-71.05	-87.32	-1.26	8.68
221.902	25.81	33.42	55.76	105.18	53.92	76.75	58.32	70.86	-2.81	2.98	-4.6	3.84	-69.81	-87.31	0.67	10.78
222.602	25.92	34.33	51.13	108.76	58.58	79.28	64.92	71.22	-2.7	3.89	-9.23	7.42	-65.15	-84.78	7.27	11.14
223.303	22.09	44.03	60.09	101.7	51.86	84.65	60.45	68.14	-6.53	13.59	-0.27	0.36	-71.87	-79.41	2.8	8.06
224.001	21.76	40.4	67.32	104.04	52.11	86.81	47.13	73.2	-6.86	9.96	6.96	2.7	-71.62	-77.25	-10.52	13.12
224.702	24.11	35.45	54.99	102.57	59.89	96.84	78.83	64.26	-4.51	5.01	-5.37	1.23	-63.84	-67.22	21.18	4.18
225.402	23.75	34.39	61.31	95.44	55.26	111.49	51.2	60.65	-4.87	3.95	0.95	-5.9	-68.47	-52.57	-6.45	0.57
226.102	23.76	35.98	59.2	97.99	57.68	119.21	72.37	70.3	-4.86	5.54	-1.16	-3.35	-66.05	-44.85	14.72	10.22
226.802	24.23	37.16	59.71	102.63	56.06	119.14	64.99	69.78	-4.39	6.72	-0.65	1.29	-67.67	-44.92	7.34	9.7
227.503	26.45	37.63	53.3	106.44	58.41	120.54	62.07	71.89	-2.17	7.19	-7.06	5.1	-65.32	-43.52	4.42	11.81
228.203	21.53	40.07	61.62	104.02	60.66	118.57	66.12	75.47	-7.09	9.63	1.26	2.68	-63.07	-45.49	8.47	15.39
228.902	21	36.61	58.36	106.45	57.75	114.75	74.6	78.29	-7.62	6.17	-2	5.11	-65.98	-49.31	16.95	18.21
229.603	24.08	37.61	66.61	104.81	53.01	115.92	75.03	64.61	-4.54	7.17	6.25	3.47	-70.72	-48.14	17.38	4.53
230.303	24.34	40.19	57.61	115.58	56.52	123.68	67.07	74.83	-4.28	9.75	-2.75	14.24	-67.21	-40.38	9.42	14.75
231.004	21.21	42.45	56.19	111.8	63.14	124.42	57.87	74.74	-7.41	12.01	-4.17	10.46	-60.59	-39.64	0.22	14.66
231.704	25.5	35.22	58.09	102.45	62.85	118.67	68.31	74.69	-3.12	4.78	-2.27	1.11	-60.88	-45.39	10.66	14.61
232.402	24.71	34.65	55.77	112.99	67.28	136.44	57.08	78.8	-3.91	4.21	-4.59	11.65	-56.45	-27.62	-0.57	18.72
233.103	32.32	38.06	65.52	109.11	70.18	133.93	58.77	76.76	3.7	7.62	5.16	7.77	-53.55	-30.13	1.12	16.68
233.804	27.24	36.04	63.64	108.14	73.5	123.72	77.2	76.29	-1.38	5.6	3.28	6.8	-50.23	-40.34	19.55	16.21
234.505	24.15	40.92	60.93	115.69	62.85	115.1	70.27	68.83	-4.47	10.48	0.57	14.35	-60.88	-48.96	12.62	8.75
235.204	26.39	32.32	60.76	118.6	60.84	125.87	63.27	76.56	-2.23	1.88	0.4	17.26	-62.89	-38.19	5.62	16.48
235.905	23.09	33.29	56.08	112.49	64.44	116.86	65.4	79.75	-5.53	2.85	-4.28	11.15	-59.29	-47.2	7.75	19.67
236.605	26.7	38.59	57.86	124.75	56.69	115.61	73.73	69.02	-1.92	8.15	-2.5	23.41	-67.04	-48.45	16.08	8.94
237.305	22.59	33.95	53.26	118.17	51.63	114.24	77.83	67.59	-6.03	3.51	-7.1	16.83	-72.1	-49.82	20.18	7.51
238.003	30.72	40.44	52.21	128.76	52.4	116.92	67.12	76.29	2.1	10	-8.15	27.42	-71.33	-47.14	9.47	16.21
238.705	24.08	36.39	57.32	131.79	47.12	111.72	64.23	76.44	-4.54	5.95	-3.04	30.45	-76.61	-52.34	6.58	16.36
239.403	26.95	39.98	66.61	133.09	56.72	108.42	63.71	81.91	-1.67	9.54	6.25	31.75	-67.01	-55.64	6.06	21.83
240.103	29.92	37.68	62.89	133.12	57.4	126.01	77.56	82.39	1.3	7.24	2.53	31.78	-66.33	-38.05	19.91	22.31
240.803	133.69	64.89	245.55	231.61	116.57	202.45	209.93	171.81	105.07	34.45	185.19	130.27	-7.16	38.39	152.28	111.73
241.503	183.29	71.06	261.63	279.91	132.69	268.68	214.29	195.74	154.67	40.62	201.27	178.57	8.96	104.62	156.64	135.66
242.203	162.07	61.88	226.34	309.13	159.24	284.77	217.64	176.06	133.45	31.44	165.98	207.79	35.51	120.71	159.99	115.98
242.903	118.58	58.8	200.82	307.92	176.91	280.46	214.17	179.46	89.96	28.36	140.46	206.58	53.18	116.4	156.52	119.38
243.603	146.15	66.86	274.24	359.26	200.44	284.1	208.71	261.86	117.53	36.42	213.88	257.92	76.71	120.04	151.06	201.78
244.304	161.34	64.35	252.89	414.31	203.47	278.72	188.69	251.11	132.72	33.91	192.53	312.97	79.74	114.66	131.04	191.03
245.002	94.05	51.35	171.06	421.78	213.89	223.76	156.63	243.9	65.43	20.91	110.7	320.44	90.16	59.7	98.98	183.82
245.703	46.23	46.94	122.35	373.39	196.49	206.29	116.03	201.36	17.61	16.5	61.99	272.05	72.76	42.23	58.38	141.28
246.404	34.35	41.13	81.46	312.91	166.02	204.3	107.27	164.38	5.73	10.69	21.1	211.57	42.29	40.24	49.62	104.3
247.104	25.84	37.22	68.59	258.13	148.87	175.48	89.36	148.41	-2.78	6.78	8.23	156.79	25.14	11.42	31.71	88.33
247.802	24.3	36.32	63.91	230.45	122.93	158.51	65.93	119.61	-4.32	5.88	3.55	129.11	-0.8	-5.55	8.28	59.53
248.504	28.03	41.81	66.41	208.99	108.37	150.9	59.07	107.86	-0.59	11.37	6.05	107.65	-15.36	-13.16	1.42	47.78
249.204	23.11	34.44	52.37	191.44	96.38	140.32	58.91	99.11	-5.51	4	-7.99	90.1	-27.35	-23.74	1.26	39.03
249.903	22.59	39.27	56.83	175.79	90.45	136.38	62.05	89.78	-6.03	8.83	-3.53	74.45	-33.28	-27.68	4.4	29.7
250.603	24.85	39.69	57.3	163.7	85.16	140.56	54.72	82.2	-3.77	9.25	-3.06	62.36	-38.57	-23.5	-2.93	22.12
251.304	23.19	33.87	56.18	153.37	73.43	132.67	57.33	83.64	-5.43	3.43	-4.18	52.03	-50.3	-31.39	-0.32	23.56
252.004	25.68	35.69	57.34	146.27	70.8	118.16	47.4	91.51	-2.94	5.25	-3.02	44.93	-52.93	-45.9	-10.25	31.43
252.704	22.69	35.17	53.86	143.03	75.53	108.96	51.64	73.27	-5.93	4.73	-6.5	41.69	-48.2	-55.1	-6.01	13.19
253.404	22.42	38.63	56.28	135.97	68.06	101.2	51.04	71.67	-6.2	8.19	-4.08	34.63	-55.67	-62.86	-6.61	11.59
254.104	26.02	41.43	58.68	124.07	70.41	98.55	52.99	82.56	-2.6	10.99	-1.68	22.73	-53.32	-65.51	-4.66	22.48
254.803	25.85	38.23	56.57	123.51	69.42	99.53	72.85	74.32	-2.77	7.79	-3.79	22.17	-54.31	-64.53	15.2	14.24
255.505	22.32	37.06	61.49	121.23	66.18	101.41	61.6	81.8	-6.3	6.62	1.13	19.89	-57.55	-62.65	3.95	21.72
256.204	26.03	32.65	58.2	112.72	63.11	101.46	65.87	81.93	-2.59	2.21	-2.16	11.38	-60.62	-62.6	8.22	21.85
256.903	24.43	40.53	77.27	103.56	58.71	97.92	56.19	79.05	-4.19	10.09	16.91	2.22	-65.02	-66.14	-1.46	18.97
257.604	25.56	38.94	73.59	105.67	54.7	103.16	57.08	89.32	-3.06	8.5	13.23	4.33	-69.03	-60.9	-0.57	29.24
258.304	22.1	35.43	66.22	107.83	56.66	102.31	55.93	77.49	-6.52	4.99	5.86	6.49	-67.07	-61.75	-1.72	17.41
259.004	28.46	36.15	63.07	105.33	54.68	87.97	54.21	80.9	-0.16	5.71	2.71	3.99	-69.05	-76.09	-3.44	20.82
259.704	23.92	42.12	59.1	103.79	64.77	84.13	51.09	91.7	-4.7	11.68	-1.26	2.45	-58.96	-79.93	-6.56	31.62
260.402	22.71	38	52.12	100.52	58.12	87.35	55.24	84.74	-5.91	7.56	-8.24	-0.82	-65.61	-76.71	-2.41	24.66
261.104	28.02	37.59	56.3	109.79	52.82	89.43	48.91	71.33	-0.6	7.15	-4.06	8.45	-70.91	-74.63	-8.74	11.25
261.803	23.02	33.36	64.79	107.76	52.33	107.67	70.4	78.57	-5.6	2.92	4.43	6.42	-71.4	-56.39	12.75	18.49
262.503	28.76	36.66	57.19	102.25	51.2	99.69	61.68	89.17	0.14	6.22	-3.17	0.91	-72.53	-64.37	4.03	29.09
263.203	25.62	35.86	59.59	105.1	60.04	99.51	61.44	84.31	-3	5.42	-0.77	3.76	-63.69	-64.55	3.79	24.23
263.902	28.86	39.35	65.79	101.72	56.34	93.02	45.77	83.69	0.24	8.91	5.43	0.38	-67.39	-71.04	-11.88	23.61
264.602	23.7	38.32	61.92	95.24	53.36	90.48	51.04	90.63	-4.92	7.88	1.56	-6.1	-70.37	-73.58	-6.61	30.55
265.303	28.16	38.41	80.14	96.11	62.95	94.65	60.17	86.71	-0.46	7.97	19.78	-5.23	-60.78	-69.41	2.52	26.63
266.002	33	42.92	91.48	99.26	51.58	102.81	62.32	90.23	4.38	12.48	31.12	-2.08	-72.15	-61.25	4.67	30.15
266.703	24.97	37.75	78.68	99.08	54.17	96.97	56.95	80.16	-3.65	7.31	18.32	-2.26	-69.56	-67.09	-0.7	20.08
267.403	22.82	32.16	65.46	99.9	55.98	104.13	59.6	81.12	-5.8	1.72	5.1	-1.44	-67.75	-59.93	1.95	21.04
268.104	25.44	38.28	61.11	100.88	59.18	94.89	57.52	87.45	-3.18	7.84	0.75	-0.46	-64.55	-69.17	-0.13	27.37
268.802	24.08	31.05	65.29	97.92	60.21	107.3	43.83	77.22	-4.54	0.61	4.93	-3.42	-63.52	-56.76	-13.82	17.14
269.502	24.89	41.26	57.69	99.02	58.41	103.07	48.25	83.43	-3.73	10.82	-2.67	-2.32	-65.32	-60.99	-9.4	23.35
270.202	21.16	35.85	63.08	93.52	58.08	107.58	58.83	79.71	-7.46	5.41	2.72	-7.82	-65.65	-56.48	1.18	19.63
270.903	23.8	36.54	63.04	92.94	60.63	108.75	62.35	84.33	-4.82	6.1	2.68	-8.4	-63.1	-55.31	4.7	24.25
271.603	25.79	43.06	68.01	99.07	60.58	100.14	54.97	78.95	-2.83	12.62	7.65	-2.27	-63.15	-63.92	-2.68	18.87
272.302	22.3	36.87	62.53	97.66	60.94	109.18	59.51	84.59	-6.32	6.43	2.17	-3.68	-62.79	-54.88	1.86	24.51
273.003	22.24	37.38	60.84	96.33	58.4	110.69	57.95	84.71	-6.38	6.94	0.48	-5.01	-65.33	-53.37	0.3	24.63
273.704	23.28	37.39	63.49	102.64	60.15	114.78	67.93	81.89	-5.34	6.95	3.13	1.3	-63.58	-49.28	10.28	21.81
274.404	22.12	38.54	60.37	92.05	64.37	115.81	69.99	86.48	-6.5	8.1	0.01	-9.29	-59.36	-48.25	12.34	26.4
275.104	24.92	33.6	59.64	103.39	67.87	103.46	60.04	80.23	-3.7	3.16	-0.72	2.05	-55.86	-60.6	2.39	20.15
275.804	25.48	37.22	72.99	104.05	64.77	109.65	59.49	71.68	-3.14	6.78	12.63	2.71	-58.96	-54.41	1.84	11.6
276.503	21.38	32.47	78.87	92.53	77.17	113.08	66.63	80.2	-7.24	2.03	18.51	-8.81	-46.56	-50.98	8.98	20.12
277.202	24.97	38.99	82.21	103.82	76.01	107.55	56.21	74.66	-3.65	8.55	21.85	2.48	-47.72	-56.51	-1.44	14.58
277.903	23.52	37.82	101.02	101.1	76.46	120.35	57.33	80.92	-5.1	7.38	40.66	-0.24	-47.27	-43.71	-0.32	20.84
278.603	26.59	37.99	119.88	97.84	70.21	108.76	56.21	68.9	-2.03	7.55	59.52	-3.5	-53.52	-55.3	-1.44	8.82
279.303	25.72	39.46	103.04	97.75	72.61	119.56	62.16	63.01	-2.9	9.02	42.68	-3.59	-51.12	-44.5	4.51	2.93
280.003	27.92	38.15	92.83	103.56	71.61	120.41	57.51	70.08	-0.7	7.71	32.47	2.22	-52.12	-43.65	-0.14	10
280.703	21.58	35.3	81.88	96.86	75.15	106.24	57.93	75.3	-7.04	4.86	21.52	-4.48	-48.58	-57.82	0.28	15.22
281.403	23.82	39	75.75	96.91	75.64	113.49	65.97	70.68	-4.8	8.56	15.39	-4.43	-48.09	-50.57	8.32	10.6
282.103	23.57	37.09	69.82	109.18	78.4	104.84	57.17	71.61	-5.05	6.65	9.46	7.84	-45.33	-59.22	-0.48	11.53
282.802	24.76	36.03	62.77	114.1	69.54	114.03	60.01	73.17	-3.86	5.59	2.41	12.76	-54.19	-50.03	2.36	13.09
283.502	25.17	33.66	70.51	111.42	65.74	111.11	58.04	72.36	-3.45	3.22	10.15	10.08	-57.99	-52.95	0.39	12.28
284.203	24.93	36.26	70.87	110.02	69.41	107.29	63.51	76.82	-3.69	5.82	10.51	8.68	-54.32	-56.77	5.86	16.74
284.903	23.48	39.46	70.74	113.13	78.11	103.63	54.2	64.56	-5.14	9.02	10.38	11.79	-45.62	-60.43	-3.45	4.48
285.603	26.31	32.42	70.3	106.36	74.42	99.17	68.97	70.14	-2.31	1.98	9.94	5.02	-49.31	-64.89	11.32	10.06
286.303	25.32	40.94	67.18	102.84	79.41	115.37	80.53	70.97	-3.3	10.5	6.82	1.5	-44.32	-48.69	22.88	10.89
287.003	25.54	34.2	65.52	109.91	74.89	120.01	48.89	80.1	-3.08	3.76	5.16	8.57	-48.84	-44.05	-8.76	20.02
287.703	26.43	38.88	68.49	96.77	72.48	114.2	52.95	66.92	-2.19	8.44	8.13	-4.57	-51.25	-49.86	-4.7	6.84
288.402	26.56	40.14	67.76	97.4	73.77	107.72	54.6	66.85	-2.06	9.7	7.4	-3.94	-49.96	-56.34	-3.05	6.77
289.103	27.56	36.29	65.62	96.3	71.2	107.2	47.04	73.72	-1.06	5.85	5.26	-5.04	-52.53	-56.86	-10.61	13.64
289.802	25.47	36.24	67.67	104.91	69.5	100.32	46.75	100.65	-3.15	5.8	7.31	3.57	-54.23	-63.74	-10.9	40.57
290.504	23.86	37.41	70.79	100.41	70.27	114.14	58.36	118.28	-4.76	6.97	10.43	-0.93	-53.46	-49.92	0.71	58.2
291.202	29.07	34.36	69.01	99.57	66.01	116.42	55.04	98.38	0.45	3.92	8.65	-1.77	-57.72	-47.64	-2.61	38.3
291.903	25.98	35.61	65.86	90.93	73.31	128.45	68.52	88.41	-2.64	5.17	5.5	-10.41	-50.42	-35.61	10.87	28.33
292.603	23.3	34.68	68.19	94.38	69.02	129.9	51.88	82.42	-5.32	4.24	7.83	-6.96	-54.71	-34.16	-5.77	22.34
293.305	21.62	34.92	61.86	97.28	68.69	126.83	60.56	86.5	-7	4.48	1.5	-4.06	-55.04	-37.23	2.91	26.42
294.003	24.73	38.15	57.51	96.09	59.7	117.59	60.6	73.5	-3.89	7.71	-2.85	-5.25	-64.03	-46.47	2.95	13.42
294.703	29.33	39.26	57.87	100.28	63.48	117.68	42.92	77.55	0.71	8.82	-2.49	-1.06	-60.25	-46.38	-14.73	17.47
295.404	26.7	33.97	54.78	91.09	63	112.75	50.08	77.8	-1.92	3.53	-5.58	-10.25	-60.73	-51.31	-7.57	17.72
296.103	22.61	37.18	53.64	88	65.09	107.39	46.31	67.11	-6.01	6.74	-6.72	-13.34	-58.64	-56.67	-11.34	7.03
296.804	25.97	35.4	57.77	90.89	62.19	115.81	52.92	63.11	-2.65	4.96	-2.59	-10.45	-61.54	-48.25	-4.73	3.03
297.503	21.26	37.62	63.97	96.94	62.08	107.63	48.85	63.13	-7.36	7.18	3.61	-4.4	-61.65	-56.43	-8.8	3.05
298.202	25.68	39.06	66.17	97.44	65.53	114	60.29	60.45	-2.94	8.62	5.81	-3.9	-58.2	-50.06	2.64	0.37
298.905	24.43	40.74	62.34	97.55	76.12	117.73	58.77	68.95	-4.19	10.3	1.98	-3.79	-47.61	-46.33	1.12	8.87
299.604	23.69	32.82	76.15	91.66	76.09	142.7	52.92	67.64	-4.93	2.38	15.79	-9.68	-47.64	-21.36	-4.73	7.56

## Sheet: Fig4D-timelapse
Time [s]	#1 (ICC)	#2 (SMC)	Time [s]	#1 (ICC)	#2 (SMC)	Time [s]	#1 (ICC)	#2 (SMC)	Time [s]	#1 (L-ICC)	#2 (L-SMC)	#3 (R-ICC)	#4 (R-SMC)	Time [s]	#1 (ICC)	#2 (SMC)	Time [s]	#1 (ICC)	#2 (SMC)	Time [s]	#1 (ICC)	#2 (SMC)	Time [s]	#1 (ICC)	#2 (SMC)	Time [s]	#1 (ICC)	#2 (SMC)	Time [s]	#1 (ICC)	#2 (SMC)	Time [s]	#1 (ICC)	#2 (SMC)	Time [s]	#1 (ICC)	#2 (SMC)	Time [s]	#1 (ICC)	#2 (SMC)
0.065	201.1	140.61	0.066	191.49	183.9	0.064	140.22	165	-0.001	220.36	422.1	68.79	156.93	0.065	133.76	196.36	0.065	225.58	283.35	0.063	59.81	46.4	0.063	194.94	429.32	0.065	33.54	25.97	-0.001	76.39	27.08	0.066	85.32	127.81	0.066	217.09	125.3	0.065	98.34	129.84
1.242	205.2	124.09	1.244	166.22	165.66	1.242	164.57	185.25	0.768	169.93	336.39	78.62	153.54	0.768	156.8	178.11	0.77	258.01	287.59	0.767	74.93	41.49	0.767	170.28	437.8	0.769	29.56	31.25	0.77	80.69	25.45	1.244	88.95	139.31	1.244	205.33	108.13	0.768	81.31	110.07
2.411	223.28	129.14	2.411	169.7	177.69	2.41	191.3	173.16	1.463	127.5	358.45	73.4	163.63	1.464	152.23	194.14	1.465	238.9	298.58	1.463	73.3	48.17	1.463	124.41	403.91	1.464	35.31	27.71	1.465	77.49	31.91	2.412	100.68	133.25	2.411	224.09	120.57	1.465	84.51	124.27
3.579	229.07	128.24	3.58	167.82	185.41	3.578	178.34	177.9	2.167	111.18	317.27	74.84	166.84	2.168	147.13	199.44	2.169	241.42	282.69	2.169	80.11	46.04	2.169	120.15	370.95	2.169	30.46	29.05	2.168	74.73	28.58	3.58	70.67	133.86	3.58	211.47	115.72	2.169	75.09	103.62
4.747	221.04	148.36	4.748	190.92	189.66	4.746	221.27	164.41	2.869	85.39	294.6	76.26	184.95	2.868	136.84	216.42	2.87	248.75	310.45	2.867	72.01	53.86	2.867	123.35	323.26	2.868	34.07	29.03	2.867	83.79	26.91	4.749	89.48	99.9	4.748	218.12	121.87	2.869	93.09	107.27
5.915	217.59	137.93	5.916	171.28	221.07	5.913	257.84	188.24	3.569	78.2	251.96	89.97	173.63	3.567	119.31	208.38	3.568	262.17	296.21	3.568	69.49	50.28	3.568	94.7	314.92	3.57	34.46	29.17	3.567	74.11	24.71	5.917	87.18	121.92	5.916	187.19	123.15	3.568	87.58	97.94
7.083	227.66	123.36	7.086	177.79	210.6	7.081	196.88	165.58	4.265	80.68	232.9	63.96	187.04	4.268	143.6	222.74	4.27	263.72	305.06	4.264	68.13	49.7	4.264	94.12	307.75	4.268	32.26	24.39	4.268	68.86	21.85	7.085	60.71	105.12	7.086	211.88	129.15	4.27	80.48	105.47
8.251	1057.55	480.18	8.254	217.61	191.65	8.249	181.82	208.01	4.968	124.61	227.47	76.43	205.68	4.969	142.91	214.86	4.969	254.88	330.33	4.968	75.39	48.99	4.968	72.52	287.88	4.969	32.83	27.89	4.968	69.37	28.97	8.253	90.62	113.65	8.254	214.47	117.48	4.968	86.66	94.16
9.419	587.65	489.33	9.422	190.77	248.79	9.415	166.12	163	5.669	103.01	228.71	73.29	182.26	5.667	142.13	228.41	5.67	287.16	281.28	5.668	79.32	54.88	5.668	70.91	287.86	5.669	30.94	25.87	5.664	71.11	26.12	9.419	82.01	99.27	9.422	203.21	127.37	5.668	93.16	81.74
10.59	268.97	405.74	10.59	200.14	202.42	10.584	165.81	175.71	6.37	86.56	209.26	78.26	185.19	6.369	148.14	196.72	6.37	292.07	288.98	6.368	78.8	44.12	6.368	84.26	275.3	6.368	29.75	26.23	6.367	74.89	26.32	10.587	84.47	106.99	10.59	191.46	121.72	6.369	86.67	86.38
11.758	248.66	268.49	11.756	194.41	198.61	11.752	143.56	189.25	7.068	75.17	197.66	77.81	195.67	7.069	137.53	216.13	7.069	299.57	319.32	7.067	84.91	54.55	7.067	69.59	228.19	7.07	26.51	26.54	7.067	74.23	26.71	11.755	87.07	149.09	11.756	238.25	108.99	7.068	71.78	99.19
12.926	204.64	211.14	12.924	223.24	169.07	12.92	166.74	174.26	7.769	89.13	202.08	81.36	191.98	7.769	129.89	203.7	7.769	280.3	353.32	7.768	72.61	56.08	7.768	58.21	241.37	7.769	29.82	26.14	7.768	79.5	27.79	12.921	95.88	137.25	12.924	214.95	111.2	7.77	83.49	83.43
14.095	225.91	186.5	14.092	188.54	194.24	14.088	130.95	170.94	8.469	83.38	207.7	77.08	166.79	8.469	133.94	215.92	8.469	244.1	292.91	8.467	81.92	52.56	8.467	60.23	292.67	8.47	33.67	26.62	8.469	77.76	23.11	14.09	81.46	127.9	14.092	196.84	117.97	8.47	78.52	83.05
15.264	195.51	168.45	15.259	187.73	168.66	15.254	147.51	169.94	9.169	84.96	196.73	81.92	179.02	9.169	154.21	190.16	9.171	281.54	330.55	9.169	79.14	51.55	9.169	70.53	280.91	9.17	29.78	25.99	9.165	83.47	24.84	15.257	76.77	115.88	15.259	230.13	124.31	9.17	72.58	76.13
16.432	240.31	160.01	16.427	204.47	180.62	16.422	172.95	171.49	9.869	102.99	203.48	70.92	172.65	9.868	164.13	199.41	9.868	239.14	283.16	9.867	85.56	51.86	9.867	78.05	278.08	9.87	25.76	32.58	9.869	75.57	31.84	16.425	64.26	113.01	16.427	198.7	109.58	9.869	83.28	83.66
17.6	229.28	149.6	17.595	165.73	167	17.59	164.42	178.09	10.569	80.8	201.81	70.71	162.37	10.568	191.12	210.03	10.569	212.7	284.35	10.567	95.31	59.35	10.567	83.01	238.08	10.57	30.94	27.89	10.568	77.2	23.23	17.593	83.68	100.45	17.595	205.93	120.36	10.57	80.74	89.84
18.767	220.04	140.22	18.763	160.12	161.5	18.759	252.47	171.26	11.27	77.98	193.11	67.84	158.39	11.268	222.12	178.85	11.269	227.67	280.13	11.269	97.36	63.29	11.269	79.18	213.81	11.27	30.67	25.24	11.268	79.89	26.13	18.76	65.04	111.4	18.763	229.29	112.73	11.27	81.02	88.14
19.936	190.18	126.02	19.932	185.98	159.56	19.927	292.12	157.63	11.971	72.5	180.05	73.01	170.42	11.968	204.57	194.29	11.97	234.68	290.34	11.969	105.6	57.96	11.969	71.25	207.87	11.97	33.43	29.79	11.969	79.02	25.4	19.928	85.62	95.86	19.932	243.58	110.96	11.969	83.35	84.19
21.104	229.91	160.24	21.101	195.95	143.14	21.095	271.9	173.23	12.67	75.59	166.28	58.83	180.46	12.669	174.06	199.64	12.669	241.22	276.84	12.668	79.04	51.08	12.668	76.24	192.97	12.669	32.18	26.94	12.669	77.23	28.13	21.096	71.71	95.32	21.101	224.02	101.38	12.669	84.1	99.04
22.272	949.19	451.31	22.27	157.63	134.09	22.263	207.84	183.68	13.37	79.51	178.29	67.36	174.74	13.367	163.09	200.84	13.37	253.62	309.15	13.364	104.23	69.8	13.364	101.39	206.56	13.368	29.03	21.09	13.37	74.72	25.66	22.264	84.52	113.23	22.27	221.26	112.99	13.371	99.83	97.61
23.44	442.29	387.65	23.436	167.91	185.69	23.431	182.16	165.35	14.07	62.99	172.35	75.91	140.19	14.068	144.79	211.44	14.068	224.68	279.38	14.069	98.38	72.1	14.069	105.2	226.52	14.069	30.81	29.74	14.068	76.5	29.98	23.432	76	108.39	23.436	211.66	122.74	14.069	97.99	106.52
24.608	275.39	278.23	24.604	213.49	227.61	24.598	142.94	202.31	14.771	69.53	151.95	70.18	164.54	14.769	147.08	178.61	14.769	229.55	252.36	14.769	98.79	69.96	14.769	85.28	250.47	14.769	33.08	31.08	14.77	101.33	46.77	24.599	65.97	95.38	24.604	219.39	125.4	14.769	98.14	105.13
25.776	244.53	236.95	25.772	177.54	213.11	25.767	182.08	194.71	15.469	100.47	158.12	66.75	152.35	15.468	128.87	213	15.468	205.28	253.3	15.468	94.94	69.3	15.468	107.37	242.56	15.467	31.29	27.14	15.468	139.93	70.92	25.767	77.19	113.1	25.772	206.74	128.23	15.468	102.31	111.65
26.944	241.83	185.22	26.94	179.71	165.28	26.937	184.73	180.11	16.169	81.72	158.42	63.35	172.74	16.169	144.98	185.12	16.17	240.35	283.56	16.169	150.06	76.32	16.169	131.23	254.14	16.169	28.96	27.31	16.17	173.57	67.3	26.935	67.87	124.67	26.94	183.43	118.05	16.168	98.06	103.06
28.111	219.12	138.88	28.108	192.52	179.15	28.104	179.34	187.88	16.87	85.61	173.65	75.07	160.14	16.869	154.53	196.78	16.869	252.87	258.99	16.867	629.79	354.27	16.867	96.31	240.08	16.867	30.81	33.45	16.867	179.1	74.23	28.103	78.2	107.42	28.108	212.16	120.09	16.868	100.43	110.4
29.28	217.55	149.49	29.276	184.61	172.93	29.272	243.8	172.64	17.569	106.27	170.42	71.75	170.96	17.569	174.12	178.05	17.569	199.42	277.15	17.568	430.22	535.8	17.568	140.93	283.32	17.569	32.3	28	17.569	195.31	77.72	29.271	78.1	101.23	29.276	211.43	125.25	17.568	100.51	116.32
30.448	229.39	127.63	30.444	190.66	184.29	30.44	208.69	162.73	18.269	95.82	165.58	77.31	174.88	18.269	174.41	181.75	18.268	237.16	270.97	18.268	393.38	539.61	18.268	440	616.29	18.267	33.76	29.74	18.269	193.26	81.2	30.439	76.61	104.72	30.444	224.64	116.8	18.269	94.36	102.15
31.616	236.14	136.26	31.612	182.28	143.53	31.608	205.59	225.85	18.969	78.43	182.85	92.27	174.51	18.969	180.85	170.79	18.97	196.9	285.62	18.969	406.61	482.42	18.969	477.98	805.43	18.968	27.17	28.17	18.97	196.21	74.25	31.607	86.29	108.86	31.612	203.15	108.16	18.969	115.13	109.81
32.784	237.67	113.84	32.78	197.42	294.99	32.776	182.73	175.33	19.669	79.69	166.22	66.71	148.7	19.669	162.91	187.52	19.669	222.06	268.44	19.668	457.22	379.99	19.668	239.14	842.93	19.668	30.95	28.3	19.669	176.33	67.91	32.776	87.14	96.87	32.78	216.22	155.76	19.669	94.54	101.48
33.952	195.82	119.89	33.946	193.52	252.83	33.943	152.59	187.69	20.367	75.42	181.26	73.52	183.91	20.37	147.21	205.38	20.369	186.19	259.43	20.367	573.39	414.91	20.367	212.24	871.41	20.364	30.7	23.71	20.369	180.14	50.53	33.942	65.41	95.98	33.946	209.12	152.15	20.369	87.78	114.71
35.118	222.91	116.9	35.115	160.12	206.22	35.112	152.03	222.35	21.069	79.82	169.7	71.04	167.68	21.07	166.5	194.09	21.069	226.33	273.25	21.068	413.96	340.22	21.068	241.65	943.73	21.068	31.28	26.43	21.069	166.9	37.82	35.11	90.92	96.22	35.115	205.64	128.3	21.069	85.37	102.43
36.286	202.32	116.67	36.283	185.15	160.9	36.28	146.85	213.48	21.768	68.69	179.48	82.57	168.46	21.768	166.5	192.67	21.769	186.67	277.35	21.768	534.7	375.83	21.768	224	898.1	21.768	36.62	22.05	21.769	160.02	35.47	36.276	99.21	142.55	36.283	216.74	120.09	21.769	81.09	97.16
37.454	203.12	125	37.451	215.41	203.1	37.448	148.75	196.12	22.47	73.3	163.65	71.22	160.93	22.468	162.13	218.69	22.468	193.75	270.28	22.468	360.31	315.45	22.468	214.77	793.59	22.469	30.29	25.4	22.468	150.65	27.5	37.444	458.05	354.61	37.451	212.4	120.2	22.47	85.33	104.49
38.623	217.49	128.35	38.619	172.65	180.55	38.616	149.5	238.51	23.167	57.24	155.12	78.88	178.4	23.168	170.16	209.3	23.169	219.14	295.48	23.167	221.62	250.5	23.167	291.8	843.02	23.168	31.7	27.5	23.168	135.11	30.23	38.612	471.63	350.49	38.619	205.96	120.36	23.168	90.24	86.22
39.791	223.32	149.73	39.787	210.23	154.41	39.784	178.94	224.22	23.869	65.39	167.82	69.36	141.77	23.868	157.8	231.65	23.869	229.42	277.15	23.867	142.6	229.79	23.867	309.07	1087.65	23.87	31.69	28.9	23.869	131.52	24.43	39.78	430.12	355.83	39.787	208.84	119.6	23.868	83.19	87.43
40.959	197.56	124.88	40.955	180.73	189.26	40.952	151.41	213.68	24.569	71.33	158.99	74.81	149.58	24.568	156.28	210.13	24.569	221.17	293.79	24.568	109.71	167.31	24.568	193.47	1096.62	24.569	29.71	27.17	24.568	116.08	26.64	40.946	198.59	295.92	40.955	226.61	122.49	24.568	72.37	83.4
42.127	883.57	473.04	42.123	159.51	165.12	42.121	156.29	260.28	25.27	88.58	152.75	66.76	138.21	25.268	159.37	205.34	25.269	218.13	293.47	25.268	86.73	140.34	25.268	202.21	846.35	25.269	29.46	28.95	25.269	113.65	31.54	42.114	101.21	193.82	42.123	231.22	106.29	25.268	87.38	88.82
43.295	601	562.36	43.289	173.99	182.65	43.289	182.21	237.26	25.97	71.61	161.3	77.97	187.79	25.968	144.92	213.27	25.969	209.99	309.2	25.968	81.85	129.96	25.968	184.22	710.06	25.969	33.79	28.73	25.969	106.96	25.38	43.281	84.8	141.57	43.289	214.08	128.44	25.969	82.09	90.32
44.462	322.05	462.68	44.457	189.62	169.66	44.458	187.33	229.26	26.669	68.93	157.6	69.89	141.89	26.668	146.15	200.85	26.67	212.78	269.89	26.668	77.06	112.19	26.668	169.69	593.61	26.669	29.41	28.39	26.669	105.76	28.64	44.449	70.64	168.65	44.457	195.85	127.62	26.667	84.47	79.73
45.631	222.53	369.22	45.624	175.4	166.96	45.626	220.82	249.8	27.369	91.01	190.3	81.1	153.49	27.364	151.96	207.61	27.369	163.83	282.1	27.368	64.79	93.17	27.368	140.25	516.53	27.368	30.98	28.81	27.369	90.02	27.83	45.616	70.8	167.53	45.624	201.47	113.6	27.37	88.74	82.87
46.797	206.27	308.2	46.793	189.15	150.12	46.793	247.13	295.46	28.068	314.11	396.43	66.25	153.39	28.068	137.29	218.02	28.07	224.13	275.01	28.068	76.26	71.96	28.068	100.1	442.35	28.07	34.12	29.4	28.068	91.93	23.95	46.782	68.28	156.38	46.793	203.51	104.9	28.068	106.98	88.34
47.965	216.44	225.75	47.961	175.41	165.43	47.961	876.25	786.68	28.769	324.26	478.17	66.35	149.68	28.768	141.52	225.19	28.77	209.32	311.46	28.768	73.68	79.14	28.768	107.65	369.85	28.769	29.76	32.28	28.768	92.11	24.3	47.95	89.02	131.37	47.961	192.97	110.88	28.767	82.31	84.83
49.133	212.57	215.22	49.128	178.15	162.84	49.129	704.14	849.46	29.469	397.01	633.14	68.51	141.86	29.468	142.09	225.94	29.47	230	283.05	29.468	76.65	79.12	29.468	99.86	340.7	29.47	29.88	32.64	29.469	84.69	24.77	49.118	90.89	151.61	49.128	201.75	107.49	29.469	83.15	78.05
50.299	233.12	205.53	50.296	166.75	173.96	50.297	1130.64	862.73	30.169	394.84	676.81	65.69	156.05	30.168	158.28	241.46	30.17	179.84	236.58	30.168	70.2	48.18	30.168	95.08	305.33	30.169	28.93	27.73	30.17	80.54	24.08	50.286	100.51	123.35	50.296	233.64	112.01	30.169	83.52	90.25
51.468	197.55	172.63	51.464	159.06	166.64	51.465	839.33	1045.56	30.869	364.57	695.18	67.79	155.65	30.867	136.31	215.06	30.872	235.61	287.18	30.867	72.66	55.92	30.867	68.61	277.9	30.869	26.84	26.88	30.87	83.49	25.38	51.455	80.39	159.68	51.464	213.28	128.84	30.869	79.38	79.24
52.636	198.88	134.78	52.632	202.06	230.83	52.633	567.63	976.2	31.569	293.07	647.49	64.29	146.33	31.569	128.12	197.8	31.57	239.81	281.35	31.567	76.2	63.02	31.567	72.1	272.95	31.569	32.31	28.39	31.568	86.11	26.31	52.622	74.73	180.33	52.632	271.4	123.61	31.569	85.1	82.13
53.802	225.28	137.32	53.8	160.66	243.12	53.802	280.91	696.15	32.269	218.11	548.14	74.2	159.37	32.267	124.4	220.54	32.27	253.74	270.53	32.269	63.29	50.8	32.269	72.7	274.46	32.269	28.55	28.65	32.27	79.34	28.07	53.791	82.47	143.89	53.8	221.43	125.38	32.269	81.49	82.87
54.971	222.51	146.95	54.967	154.73	241.63	54.971	219.81	472.59	32.969	158.66	510.02	63.55	152.4	32.969	143.8	213.35	32.969	300.23	312.84	32.967	70.98	58.83	32.967	72.58	257.41	32.969	30.14	27.88	32.97	74.22	24.77	54.958	87.93	145.31	54.967	200.19	137.49	32.969	82.23	96.84
56.138	176.01	143.64	56.136	164.59	211.81	56.138	169.91	361.43	33.67	107.78	485.95	68.45	156.12	33.667	160.88	224.99	33.67	358.43	308.9	33.668	80.88	67.21	33.668	72.22	218.88	33.669	31.55	26.05	33.67	82.56	19.39	56.124	77.97	116.08	56.136	205.85	135.79	33.67	95.92	93.98
57.306	214.9	160.64	57.304	193.26	212.52	57.306	156.33	286.77	34.369	88.56	457.18	72.28	154.75	34.363	155.53	200.47	34.37	386.58	320.31	34.368	65.08	55.5	34.368	86.82	215.04	34.368	28.09	28.3	34.369	79.78	22.85	57.292	89.88	99.82	57.304	211.63	123.18	34.369	90.74	87.91
58.478	235.5	118.92	58.471	162.03	170.37	58.474	195.54	265.97	35.069	74.29	402.91	62.73	146.12	35.067	154.78	235.89	35.07	414.68	395.95	35.069	73.43	55.89	35.069	84.43	180.95	35.067	28.41	23.11	35.069	76.54	23.64	58.46	90.46	102.83	58.471	194.2	124.42	35.067	83.78	93.67
59.646	236.14	124.7	59.639	187.28	186.41	59.642	185.98	269.13	35.77	72.18	361.5	55.08	158.61	35.769	165.37	192.42	35.769	1334.64	831.52	35.769	80.59	50.23	35.769	81.96	224.35	35.768	32.31	31.48	35.77	97.13	43.09	59.628	87.42	100.77	59.639	188.79	129.53	35.769	84.54	85.52
60.818	206.48	121.63	60.807	197.55	192.97	60.81	183.5	278.4	36.47	69.5	342.86	68.33	135.12	36.469	153.51	187.2	36.469	2376.96	1058.06	36.468	55.8	52.06	36.468	70.29	213.64	36.467	30.19	29.93	36.47	131.7	62.9	60.796	84.74	102.28	60.807	215.17	127.4	36.469	86.48	100.91
61.986	844.84	429.01	61.975	157.81	176.36	61.978	188.04	257.18	37.169	76.04	295.82	62.81	112.88	37.169	186.61	191.59	37.171	1960.55	1098.66	37.168	74.64	49.31	37.168	79.44	212.18	37.169	32.68	31.48	37.17	154.04	74.6	61.964	82.21	90.93	61.975	225.44	131.39	37.168	102.62	102.43
63.153	678.34	462.17	63.143	167.68	145.79	63.147	202.53	260.45	37.869	85.82	283.02	51.27	140.26	37.868	442.96	369.94	37.869	2355.54	1381.05	37.868	72.23	55.97	37.868	81.07	211.96	37.865	31.89	39.04	37.868	170.02	82.92	63.132	82.9	122.98	63.143	219.56	107.15	37.869	85.06	104.58
64.321	297.22	419.19	64.31	218.93	136.55	64.319	193.26	244.26	38.57	90.54	245.58	66.38	150.19	38.568	361.04	479.24	38.571	2443.33	1618.69	38.568	67.02	66.8	38.568	94.78	195.76	38.567	32.54	38.34	38.57	185.94	79.76	64.299	75.52	89.9	64.31	224.62	103.17	38.568	99.33	112.93
65.49	234.35	351.52	65.478	173.82	164.73	65.488	166.32	223.74	39.269	71.36	242.07	76.24	146.11	39.27	309.33	511.89	39.27	2514.8	1916.88	39.268	70.66	57.64	39.268	115.16	212.57	39.268	30.46	32.51	39.268	200.31	74.71	65.467	96.46	102.1	65.478	201.18	117.31	39.269	123.2	127.02
66.656	241.13	320.05	66.646	177.16	175.22	66.656	188.77	208.33	39.968	71.35	235.91	54.39	130.14	39.969	349.58	461.16	39.971	2552.59	2199.36	39.969	68.2	49.05	39.969	143.32	241.8	39.97	31.19	34.24	39.969	194.64	80.37	66.635	72.7	106.19	66.646	218.02	101.34	39.968	110.38	122.72
67.824	272.77	354.59	67.814	196.93	157.07	67.824	184.7	192.6	40.668	72.38	226.09	60.27	120.89	40.669	381.21	372.91	40.669	2337.01	2199.08	40.669	70.06	52.16	40.669	104.08	242.46	40.669	30.83	30.48	40.668	189.53	70.13	67.803	79.67	113.57	67.814	213.45	123.75	40.668	107.03	138.52
68.99	743.48	454.84	68.982	185.01	188.38	68.992	198.4	190.85	41.368	84.58	255.12	60.73	142.51	41.368	334.05	355.38	41.371	2170.86	2011.52	41.366	71.71	52.43	41.366	122.59	238.14	41.369	30.88	32.88	41.369	176.86	50.77	68.971	73.43	86.1	68.982	205.3	120.93	41.368	117.43	132.34
70.158	378.47	416.78	70.15	188.96	189.13	70.162	177.64	229.1	42.068	81.63	264.5	71.94	148.4	42.069	256.09	344.64	42.07	1736.68	1728.52	42.067	82.26	61.03	42.067	141.31	275.18	42.069	32.96	28.43	42.069	169.73	44.3	70.139	86.87	96.91	70.15	201.42	129.19	42.068	107.49	146.41
71.326	267.13	328.84	71.318	177.33	182.74	71.33	236.82	239.98	42.769	70.93	238.97	67.44	139.16	42.768	186.07	323.86	42.77	1576.97	1534.79	42.767	67.45	48.92	42.767	129.26	303.66	42.768	32.08	28.27	42.769	141.99	35.15	71.305	76.91	94.76	71.318	190.26	121.72	42.768	110.75	119.22
72.493	211.53	259.36	72.486	183.29	186.21	72.497	238.5	226.82	43.467	60.47	230.08	63.34	137.35	43.466	170.53	281.07	43.469	1583.49	1556.8	43.467	69.43	51.9	43.467	145.7	266.79	43.468	30.85	30.42	43.469	140.29	32.25	72.473	68.36	107.78	72.486	203.36	121.95	43.469	114.74	119.36
73.662	223.27	237.74	73.653	173.57	170.28	73.665	288.5	198.44	44.168	65.93	223	63.04	133.67	44.168	147.81	261.7	44.169	1472.38	1536.55	44.167	66.83	58.88	44.167	124.49	280.15	44.168	34.07	25.19	44.169	133.89	30.33	73.641	78	88.48	73.653	209.64	119.15	44.169	95.14	110.52
74.829	219.12	197.54	74.821	203.37	149.88	74.833	294.55	187.44	44.87	62.28	208.79	63.87	132.11	44.866	132.79	246.19	44.87	1560.09	1633.22	44.867	65.85	56.14	44.867	129.76	279.14	44.864	30.1	27.91	44.87	122.47	30.29	74.809	83.21	96.97	74.821	216.09	96.87	44.869	100.22	113.66
75.997	229.41	181.05	75.99	163.6	172.17	76.001	261.49	206.41	45.568	68.32	201.47	61.47	125	45.57	119.75	257.81	45.57	1472.52	1622.95	45.567	66.44	51.64	45.567	99.99	278.71	45.568	29.47	27.61	45.568	112.13	28.23	75.979	88.53	96.7	75.99	236.74	126.89	45.569	88.17	100.62
77.165	214.28	145.81	77.158	155.26	167.22	77.171	251.61	209.65	46.27	94.39	239.86	67.33	147.74	46.266	121.55	229.86	46.27	1157.65	1330.23	46.267	64.43	57.07	46.267	96.56	265.42	46.269	30.44	24.83	46.269	91.1	28.7	77.145	74.31	86.99	77.158	202.67	133.28	46.269	82.14	79.11
78.331	196.26	116.58	78.326	181.49	153.22	78.339	254.53	233.68	46.968	108.01	235.56	63.48	131.46	46.967	115.79	216.04	46.97	724.64	956.53	46.968	80.57	68.82	46.968	113.22	235.03	46.968	30.55	28.39	46.969	101.63	27.08	78.313	84.04	73.42	78.326	224.18	117.48	46.969	100.16	89.34
79.499	214.66	135.54	79.492	170.08	184.18	79.507	246.77	213.51	47.67	86.56	220.65	62.39	151.74	47.669	117.1	200.99	47.67	529.32	790.42	47.667	80.76	64.35	47.667	108.25	224.67	47.67	31.4	28.45	47.669	90.36	25.59	79.481	92.24	109.02	79.492	199.55	101.18	47.669	87.87	98.14
80.666	237.88	140.95	80.66	183.07	159.41	80.675	246.33	217.39	48.368	75.91	214.72	56.49	131.04	48.366	117.91	199.39	48.37	463.07	619.92	48.367	76.82	53.23	48.367	83.77	230.57	48.368	27.65	28.85	48.369	80.95	28.63	80.649	62.57	94.14	80.66	215.22	119.61	48.368	77.37	95.42
81.833	213.74	137.5	81.828	168.8	177.77	81.843	234.85	225.41	49.069	70.09	215.73	66.01	140.11	49.068	124.01	192.34	49.069	355.01	544.66	49.067	83.92	64.85	49.067	102.65	225.52	49.07	28.93	26.24	49.069	88.66	27.47	81.818	64.43	112.51	81.828	210.51	126.29	49.069	77.16	78.55
83.001	193.64	123.02	82.996	176.79	161.44	83.012	212.05	204.43	49.769	62.2	210.5	75.13	149.3	49.768	112.6	205.13	49.77	296.59	459.03	49.767	78.85	55.49	49.767	69.11	212.14	49.769	31.4	27.05	49.769	83.64	25.29	82.986	78.4	94.05	82.996	207.71	129.91	49.768	81.94	90.81
84.168	202.84	119.68	84.164	181.32	173.24	84.18	192.43	237.59	50.468	72.96	206.62	80.94	132.77	50.467	135.25	199.73	50.469	238.35	383.05	50.467	78.68	55.63	50.467	93.64	215.12	50.469	30.5	26.61	50.469	81.47	26.18	84.154	79.11	94.25	84.164	230.16	105.01	50.469	85.79	82.45
85.336	216.37	104.6	85.331	177.48	170.63	85.348	227.8	223.25	51.17	80.52	189.88	74.19	151.3	51.168	158.33	190.51	51.171	206.04	367.34	51.167	64.83	48.01	51.167	84.19	206.21	51.17	30.59	29.35	51.168	76.18	29.29	85.322	84.53	97.6	85.331	228.19	110.99	51.169	82.58	78.29
86.504	897.36	398.12	86.499	159.47	173.78	86.516	175.28	212.34	51.868	73.4	187.71	67.66	165.54	51.867	139.98	164.49	51.871	221.62	301.31	51.867	85.31	56.95	51.867	103.43	200.65	51.863	28.32	26.06	51.869	80.69	30.54	86.49	93.88	105.7	86.499	226.01	123.29	51.869	89.44	80.75
87.672	684.93	422.21	87.667	165.1	174.4	87.684	198.52	197.14	52.568	63.66	186.31	64.27	150.93	52.567	131.37	158.37	52.569	202.64	286.25	52.568	85.76	49.5	52.568	93.99	194.63	52.569	29	26.84	52.569	75.41	28.96	87.658	91.7	119.39	87.667	195.89	117.92	52.567	97.55	94.65
88.84	318.83	370.27	88.835	153.24	147.27	88.852	239.16	205.81	53.267	72.46	195.32	73.37	136.02	53.268	165.8	182.05	53.269	195.22	254.93	53.267	76.7	56.5	53.267	103.57	221.57	53.269	31.25	30.45	53.268	78.36	25.4	88.827	84.17	142.66	88.835	192.94	120.85	53.269	88.25	85.46
90.008	235.74	244.77	90.003	159.85	171.92	90.018	270.91	212.8	53.969	71.47	193.35	63.11	122.11	53.969	162.64	174.6	53.97	223.06	251.49	53.969	74.73	45.67	53.969	125.39	298.55	53.969	27.82	27.49	53.969	70.66	23.82	89.993	73.73	127.85	90.003	199.6	108.24	53.969	84.41	85.39
91.176	249.57	227.76	91.172	162.11	186.27	91.186	245.39	222.51	54.668	68.81	192.27	58.38	124.82	54.669	165.77	165.69	54.669	198.65	247.06	54.668	75.09	50.27	54.668	132.67	304.12	54.669	33.49	26.5	54.669	79.23	28.05	91.161	83.49	130.19	91.172	218.22	117.74	54.67	159.65	137.9
92.345	225.88	163.79	92.339	176.64	165.7	92.355	258.84	248.32	55.37	85.54	208.43	59.89	147.18	55.367	161.25	157.64	55.369	231.74	227.4	55.367	75.38	49.87	55.367	130.02	312.55	55.363	29.89	27.93	55.369	74.01	26.36	92.329	100.93	98.32	92.339	185.64	109.76	55.368	364.56	318.22
93.513	206.62	153.66	93.507	187.37	162.29	93.523	278.89	229.4	56.069	78.24	185.42	57.37	148.39	56.07	158.54	172.24	56.068	190.55	222.55	56.068	68.49	58.66	56.068	125.47	326.41	56.068	26.78	31.45	56.069	74.22	27.81	93.497	71.04	117.8	93.507	189.08	108.4	56.067	364.18	296.47
94.681	235.85	252.03	94.674	155.31	148.1	94.691	228.51	215.92	56.769	86.36	191.45	64.22	158.96	56.768	145.62	174.1	56.77	211.71	240.89	56.769	62.12	56.47	56.769	126.47	337.26	56.767	32.49	28.45	56.77	70.46	21.42	94.665	64.93	118.56	94.674	210.99	102.98	56.769	308.12	284.48
95.849	874.83	480.86	95.842	171.42	184.37	95.859	226.41	202.73	57.469	70.07	201.5	61.69	170.82	57.468	135.91	173.51	57.468	176.32	267.29	57.468	123.92	77.19	57.468	386.36	640.24	57.467	33.29	31.92	57.469	69.89	26.47	95.834	71.36	116.91	95.842	202.13	113.43	57.467	296.21	287.11
97.017	420.55	373.61	97.01	173.04	144.43	97.025	269.5	203.37	58.168	75.74	200.58	51.87	144	58.168	146.46	171.17	58.168	210.2	232.49	58.168	129.08	67.02	58.168	506.4	684.75	58.168	31.11	28.51	58.169	76.67	28.02	97.002	87.38	102.31	97.01	201.05	113.57	58.169	388.81	314.84
98.185	301.32	318.85	98.178	136.44	170.76	98.193	267.65	226.91	58.87	267.15	322.26	55.25	146.23	58.869	129.72	154.41	58.87	231.03	223.53	58.867	109.89	61.62	58.867	271.32	708.28	58.868	27.86	29.85	58.869	74.72	26.55	98.17	63.63	89.83	98.178	209.3	119.9	58.868	356.75	316.23
99.353	230.43	228.06	99.346	158.37	151.55	99.359	201.12	216.99	59.569	278.8	444.68	56.12	136.75	59.57	131.05	171.08	59.57	210.59	221.59	59.567	129.91	70.03	59.567	158.16	628.72	59.568	31.39	41.08	59.569	77.27	25.39	99.337	71.93	133.05	99.346	206.59	116.22	59.568	268.07	280.88
100.519	232.11	211.05	100.514	171	172.97	100.528	189.56	218.13	60.268	236.45	439.58	57.66	134.32	60.269	161.48	157.03	60.27	187.25	206.76	60.27	456.44	147.89	60.27	173.04	517.58	60.27	50.07	127.68	60.269	73.14	28.85	100.506	84.26	149.85	100.514	215.5	125.45	60.268	192.44	249.46
101.687	230.52	167.07	101.682	187.91	189.57	101.696	187.18	234.35	60.967	405.59	560.7	51.73	140.37	60.97	152.67	173.48	60.969	223.45	226.75	60.969	471.55	379.93	60.969	159.49	471.11	60.968	60.16	166.38	60.968	79.56	26.78	101.674	80.31	138.81	101.682	214.09	123.32	60.969	149.77	236.47
102.853	235.59	154.32	102.851	170.55	171.86	102.864	166.67	207.6	61.669	289.39	573.83	64.26	133.49	61.67	152.09	181.16	61.669	207.32	209.62	61.669	331.82	444.15	61.669	112.52	461.56	61.67	68.89	211.24	61.668	80.27	26.6	102.842	103.08	142.58	102.851	229.57	109.21	61.668	131.76	183.73
104.021	216.89	133.06	104.018	189.26	194.7	104.032	217.84	216.2	62.367	183.42	455.03	61.01	109.96	62.368	153.67	194.6	62.371	222.51	220.67	62.368	343.82	406.07	62.368	100.62	363.79	62.365	75.57	225.44	62.367	73.16	25.12	104.01	99.87	159.06	104.018	222.31	124.05	62.368	100.98	167.3
105.19	229.67	123.85	105.186	175.64	189.2	105.2	206.12	245	63.067	120.01	420.13	64.06	126.19	63.069	170.48	190.99	63.07	219.67	214.14	63.067	341.57	318.88	63.067	111.03	347.45	63.068	76.56	235.14	63.068	77.17	25.06	105.177	85.54	127.08	105.186	219.58	127.23	63.068	106.83	119.36
106.357	231.98	118.59	106.354	147	161.84	106.368	700.85	673.87	63.767	98.07	416.58	53.27	135.07	63.768	187.3	183.41	63.77	255.29	199.45	63.766	227.08	232.71	63.766	80.33	312.54	63.769	90.86	231.88	63.768	75.6	27.4	106.345	73.3	132.27	106.354	238.48	123.81	63.769	87.93	125.69
107.525	870.64	375.24	107.522	167.34	176.93	107.537	704.53	717.72	64.469	86.2	416.9	59.44	140.75	64.467	174.49	177.15	64.468	257.1	205.39	64.468	153.31	196.56	64.468	86.59	276.51	64.47	77.38	214.23	64.468	71.14	25.07	107.513	94.27	128.02	107.522	208.15	117.92	64.469	85.44	113.11
108.693	599.15	421.98	108.69	173.16	153.95	108.705	473.62	910.37	65.167	85.85	385.8	56.12	124.18	65.169	191.58	164.88	65.17	217.9	207.95	65.168	113.94	160.64	65.168	76.74	252.58	65.17	61.65	175.73	65.168	73.17	26.79	108.682	73.16	108.36	108.69	222.46	111.38	65.169	73.22	95.85
109.861	275.33	349.98	109.858	182.06	173.19	109.873	354.79	806.04	65.869	72.62	381.61	50.87	136.79	65.869	177.44	191.01	65.87	207.48	193.89	65.866	84.79	134	65.866	69.73	194.09	65.868	55.03	141.51	65.868	81.35	27.56	109.85	80.97	114.97	109.858	200.75	116.19	65.868	85.02	112.68
111.029	238.74	251.05	111.025	178.31	191.27	111.041	249.02	614.97	66.568	85.12	358.13	59.2	118.14	66.567	199.83	169.7	66.568	233.84	215.02	66.566	77.95	105.5	66.566	81.48	230.76	66.57	41.15	125.39	66.568	74.54	25.08	111.018	85.16	125.12	111.025	207.12	119.48	66.569	82.05	94.54
112.197	184.4	206.52	112.193	169.57	179.94	112.209	184.23	523.19	67.268	80.68	324.59	62.34	141.79	67.267	194.14	187.89	67.27	224.29	218.36	67.269	74.96	85.87	67.269	59.75	212.11	67.269	35.46	99.06	67.269	80.57	26.47	112.186	69.12	118.06	112.193	192.09	135.98	67.268	80.91	99.24
113.365	230.44	202.28	113.361	179.15	184.07	113.377	170.93	416.68	67.968	76.5	300.65	52.97	132.3	67.968	190.48	196.73	67.97	240.52	220.67	67.968	75.33	83.46	67.968	59.98	212.37	67.97	38.32	89.97	67.969	85.28	25.36	113.354	73.82	120.31	113.361	200.71	120.59	67.969	84.6	94.24
114.534	197.01	198.55	114.529	165.44	242.76	114.545	186.66	367.57	68.669	81.39	308.81	53.17	115.82	68.668	181.51	175.71	68.67	223.32	206.93	68.667	65.88	69.81	68.667	75.6	209.11	68.67	29.71	71.84	68.67	77.44	26.88	114.522	72.66	134.02	114.529	205.41	132.64	68.669	90.18	87.35
115.701	214.15	177.56	115.697	149.23	256.21	115.711	168.4	335.89	69.368	97.8	294.95	57.19	134.67	69.367	161.78	162.17	69.37	207.32	225.96	69.363	65.28	65.96	69.363	68.52	203.88	69.368	33.35	64.58	69.368	73.36	26.05	115.69	89.1	150.73	115.697	222.78	148.95	69.369	75.54	87.98
116.87	211.69	128.45	116.864	170.82	227.42	116.88	193.29	340.2	70.07	87.07	299.28	55.47	148.3	70.069	157.53	157.54	70.07	266.62	230.37	70.069	69.38	61.52	70.069	53.39	197.01	70.07	30.39	46.48	70.07	72.96	30.33	116.858	98.41	125.52	116.864	204.53	126.14	70.07	85.32	81.97
118.036	377.85	290.09	118.032	176.99	257.73	118.048	271.45	304.03	70.769	86.66	261.55	63.21	142.35	70.769	192.27	180.03	70.769	242.19	211.53	70.766	63.03	59.99	70.766	84.26	215.87	70.769	31.5	49.2	70.768	76.03	24.61	118.026	87.6	124.56	118.032	183.09	133.75	70.77	72.76	87.08
119.204	841.46	401.48	119.2	183.87	240.39	119.216	283.43	292.37	71.468	89.49	252.96	52.64	124.3	71.468	193.17	211.52	71.47	210.35	200.07	71.469	75.22	58.17	71.469	71.37	223.66	71.469	30.67	42.94	71.468	107.3	49.06	119.194	92.85	107.31	119.2	215.68	121.17	71.47	82.35	78.22
120.372	366.88	321.13	120.367	131.13	232.92	120.384	264.83	306.8	72.169	79.42	254.33	49.62	131.7	72.17	261.89	223.23	72.17	221.64	205.15	72.167	63.31	55.65	72.167	77.4	227.55	72.17	36.53	43.51	72.17	137.67	70.94	120.362	74.06	115.58	120.367	201.28	128.93	72.169	77.45	78.39
121.54	218.98	247.35	121.536	171.82	213.49	121.55	249.48	275.2	72.869	76.15	243.22	60.88	128.77	72.869	232.23	219.39	72.87	214.59	212.94	72.867	63.74	56.57	72.867	91.4	217.21	72.865	34.23	40.27	72.869	166.76	78.42	121.53	75.76	106.39	121.536	206.67	126.36	72.871	80.13	76.93
122.708	229.03	184.01	122.704	166.66	217.32	122.718	227.12	258.14	73.569	74.28	244.53	61.45	136.86	73.569	174.18	200.71	73.57	218.28	216.12	73.568	66.7	47.77	73.568	97.47	214.08	73.57	31.26	30.43	73.568	177.09	74.6	122.699	84.06	137.81	122.704	209.33	132.28	73.57	79.05	87
123.876	214.56	187.12	123.872	158.46	177.24	123.886	232.08	306.35	74.27	75.15	252.99	56.54	142.79	74.268	188.29	211.64	74.27	229.7	231.24	74.268	69.03	54.17	74.268	105.95	205.58	74.27	29.31	32.3	74.268	167.27	70.05	123.865	88.54	138.56	123.872	216.35	115.05	74.27	82.49	79.09
125.044	215.62	206.18	125.041	172.6	191.12	125.053	242.01	306.04	74.97	69.49	216.97	56	154.14	74.968	151.99	203.32	74.969	197.61	219.86	74.967	62.39	45.66	74.967	86.04	202.92	74.97	33.01	30.97	74.97	165.91	76.18	125.034	80.07	111.15	125.041	196.88	136.15	74.969	84.64	84.05
126.213	228.03	153.8	126.208	154.26	195.73	126.223	289.26	305.06	75.669	67.36	223.1	58.33	145.26	75.669	170.44	191.42	75.669	219.99	205.46	75.667	62.75	41.13	75.667	112.47	204.06	75.67	32.76	31.52	75.668	186.85	76.06	126.203	81.96	113.63	126.208	211.93	136.63	75.669	82.64	90.22
127.381	234.9	128.06	127.376	150.95	191.26	127.39	233.6	328.96	76.371	103.26	262.02	51.64	127.05	76.369	165.92	182.96	76.37	225.57	216.71	76.367	65.39	52.91	76.367	95.29	236.77	76.371	28.79	30.9	76.369	190.11	65.02	127.37	95	118.49	127.376	183.32	122.42	76.37	73.21	79.2
128.55	190.89	136.24	128.542	162.28	209.32	128.558	203.59	294.44	77.068	149.76	282.04	53.65	144.51	77.068	177.38	177.72	77.07	230.16	219.14	77.069	71.92	54.85	77.069	120	303.81	77.069	32.62	29.7	77.069	187.88	56.88	128.538	80.3	121.32	128.542	215.66	129.24	77.07	81.83	85.61
129.718	652.39	366.4	129.71	163.22	174.8	129.726	181.18	259.63	77.771	107.91	260.53	42.71	114.58	77.768	199.99	181.11	77.769	241.12	246.59	77.769	80.76	44.71	77.769	97.42	307.9	77.769	30.64	29.62	77.77	178.71	40.2	129.706	74.2	112.36	129.71	230.67	129.38	77.769	90.2	84.17
130.886	634.17	464.26	130.879	152.8	177.47	130.894	239.82	303.41	78.469	73.26	253.22	43.52	146.16	78.468	191.48	159.11	78.469	244.59	223.34	78.468	75.52	53.16	78.468	109.96	323.4	78.469	32.86	33.55	78.469	159.35	33.39	130.874	72.14	109.9	130.879	214.46	116.21	78.469	80.32	84.51
132.054	302.75	378.77	132.045	167.18	168.1	132.062	207.78	276.1	79.171	67.82	240.16	56.33	129.68	79.168	150.86	169.1	79.169	277.33	212.15	79.168	74.42	53.66	79.168	124.31	322.6	79.169	34.02	34.03	79.168	138.89	33.09	132.042	85.97	102.28	132.045	227.39	105.55	79.169	82.18	87.81
133.222	233.72	301.58	133.213	173.59	182.9	133.23	179.84	278.61	79.869	61.08	235.28	56.42	134.63	79.869	141.45	172.09	79.869	234.16	235.86	79.865	77.22	62.91	79.865	139.79	358.86	79.869	32.72	36.31	79.868	128.8	31.68	133.21	80.43	123.27	133.213	187.26	110.6	79.869	93.12	87.42
134.389	196.05	228.19	134.382	164.46	176.09	134.398	202.31	254.09	80.57	63.9	249.81	52.2	146.28	80.57	130.2	173.19	80.568	226.36	217.07	80.567	77.32	48.72	80.567	381.4	584.34	80.569	51.81	127.58	80.569	126.33	32.54	134.379	77.18	106.98	134.382	206.78	113.73	80.568	90.02	91.89
135.558	204.12	182.67	135.55	168.91	194.12	135.567	342.4	396.68	81.269	82.94	215.88	54.1	163.6	81.269	141.42	174.57	81.268	226.33	229.96	81.268	77.24	45.96	81.268	546.49	617.16	81.269	68.19	159.66	81.268	117.12	29.73	135.546	100.26	129.8	135.55	205.27	124.73	81.268	90.89	96.39
136.725	201.58	175.53	136.719	137.67	195.55	136.734	860.78	778.55	81.968	87.3	219.57	57.69	147.68	81.969	140.61	205.96	81.969	212.12	201.55	81.968	70.66	46.25	81.968	367.11	664.64	81.969	58.53	158.91	81.969	86.56	26.46	136.713	80.51	134.65	136.719	213.51	128.94	81.969	74.49	97.86
137.891	236.97	165.81	137.887	171.75	168.82	137.901	684.53	839.72	82.669	75.88	221.07	52.38	147.77	82.669	116.18	196.81	82.668	231.12	216.87	82.668	70.82	59.41	82.668	217.32	640.64	82.669	58.35	134.56	82.669	89.56	26.7	137.881	95.48	162.87	137.887	226.64	131.21	82.669	86.03	96.13
139.059	240.07	132.5	139.054	157.99	168.55	139.069	1171.62	910.43	83.368	88.06	221.97	108.25	211.05	83.369	127.64	192.24	83.37	197.93	238.14	83.368	81.34	55.99	83.368	189.72	615.01	83.364	49.98	103.62	83.368	93.46	27.34	139.049	86.23	157.73	139.054	205.74	117.67	83.369	87.85	84.75
140.227	786.05	375.09	140.222	150.87	162.69	140.235	937.79	1003.8	84.068	85.07	213.16	361.73	356	84.068	114.46	165.71	84.07	227.74	224.09	84.067	89.75	46.35	84.067	182.02	575.06	84.069	40.54	79.53	84.069	86.99	24.87	140.217	76.86	127.17	140.222	223.78	111.23	84.069	91.91	89.38
141.395	618.11	428.05	141.39	137.18	170.54	141.403	458.95	1016.73	84.768	76.82	186.8	330.31	425.91	84.769	132.63	183.48	84.77	253	239.46	84.767	93.99	54.48	84.767	149.91	564.71	84.769	37.06	60.52	84.768	85.24	24.69	141.385	76.88	156.25	141.39	225.23	115.06	84.769	82.72	86.65
142.563	289.2	320.52	142.558	166.76	181.74	142.569	281.24	746.53	85.47	65.79	202.8	256.35	496.35	85.468	144.23	181.34	85.468	252.75	230.98	85.467	120.46	58.87	85.467	116.91	475.91	85.469	32.99	52.03	85.468	82.93	26.5	142.553	99.98	142.76	142.558	194.88	125.51	85.468	85.74	92.75
143.731	255.83	242.24	143.726	193.22	178.37	143.738	200.85	587.96	86.168	62.74	177.31	223.36	559.09	86.17	161.14	207.69	86.17	268.09	257.79	86.167	124.78	77.44	86.167	100.33	403.39	86.169	36.43	49.31	86.17	85.73	28.45	143.722	82.47	116.91	143.726	195.12	128.98	86.168	94.89	68.15
144.9	203.71	214.47	144.892	154.62	168.43	144.907	178.05	496.39	86.87	74.67	177.26	119.76	483.68	86.868	204.79	213	86.869	233.64	273.69	86.867	557.65	241.66	86.867	88.01	355.57	86.868	32.32	46.06	86.869	88.75	25.39	144.89	97.57	129.32	144.892	222.71	116.73	86.869	90.42	94.75
146.067	232.72	147.33	146.061	178.18	155.21	146.074	220.17	416.3	87.569	81.09	193.95	78.02	401.49	87.568	183.75	238.27	87.569	237.23	232.94	87.568	434.51	501.05	87.568	70.73	356.05	87.57	30.89	35.85	87.569	75.65	28.99	146.056	87.32	142.18	146.061	221.96	110.15	87.569	87.21	82.16
147.235	205.29	160.47	147.228	177.51	171.2	147.242	187.67	386.79	88.27	75.72	202.58	73.34	302.86	88.268	160.71	219.68	88.27	261.71	255.73	88.268	317.34	543.69	88.268	59.62	303.82	88.268	36.6	36.02	88.27	79.39	25.87	147.224	93.63	102.49	147.228	217.4	123.09	88.269	83.69	90.55
148.403	377.62	289.9	148.396	181.67	178.67	148.41	176.65	383.69	88.97	60.03	202.62	54.89	234.65	88.967	153.41	208.24	88.97	241.45	259.06	88.967	339.47	477.18	88.967	66.16	300.68	88.97	32.92	35.28	88.969	81.69	24.82	148.392	95.15	140.74	148.396	215.14	119.43	88.969	79.18	85.38
149.569	723.87	406.86	149.564	184.94	187.45	149.576	179.87	293.91	89.67	74.45	220.48	58.19	210.32	89.669	165.91	218.19	89.67	253.88	262.07	89.668	407.46	519.09	89.668	57.45	296.33	89.669	30.05	33.12	89.67	85.56	23.12	149.56	70.49	131.06	149.564	225.76	114.12	89.669	82.14	90.2
150.737	283.87	269.75	150.732	165.4	187.96	150.744	178.99	280.49	90.368	87.64	230.87	58.01	164.32	90.368	163.87	194.08	90.37	263.22	241.82	90.369	383.43	498.52	90.369	58.74	268	90.365	32.24	30.04	90.37	83.49	26.63	150.728	117.11	132.26	150.732	188.58	116.1	90.369	83.45	78.98
151.905	233.49	218.01	151.9	153.26	175.46	151.912	215.1	324.09	91.07	92.67	212.73	57.97	165.93	91.069	153.96	182.49	91.069	272.36	282.38	91.068	354.71	542.82	91.068	66.15	245.92	91.069	33.04	28.11	91.07	84.23	31.5	151.896	89.73	139.45	151.9	198.77	117.69	91.068	73.22	77.79
153.072	224.99	174.4	153.068	188	177.69	153.081	253.74	309.01	91.77	82.12	205.87	57.36	150.4	91.768	163.93	195.21	91.769	232.46	271.63	91.768	343.56	500.07	91.768	56.27	258.96	91.769	30.36	29.44	91.77	78.1	24.31	153.064	75.72	151.66	153.068	213.2	112.36	91.77	89.4	84.59
154.241	209.1	133.6	154.235	175.53	153.61	154.25	216.5	284.81	92.47	64.49	227.6	50.31	137.7	92.468	152.98	197	92.469	255.41	245.29	92.469	412.72	492.35	92.469	57.12	297.09	92.469	31.43	29.03	92.47	82.43	25.16	154.23	85.37	141.05	154.235	206.03	105.51	92.468	88.24	75.63
155.41	207.02	138.22	155.404	156.54	187.78	155.417	213.75	259.44	93.169	63.72	204.35	56.44	153.7	93.168	149.13	185.29	93.169	239.55	290.84	93.169	440.35	434.94	93.169	55.89	300.95	93.169	29.08	26.35	93.168	108.01	41.73	155.398	88.01	132.2	155.404	207.62	125.76	93.169	91.31	89.46
156.577	218.42	119.8	156.571	148.41	149.71	156.585	223.93	276.57	93.87	65.57	192.86	59.28	146.6	93.87	166.77	184.7	93.87	286.49	268.92	93.867	433.43	398.91	93.867	69.25	257.87	93.868	26.39	25.3	93.869	141.56	68.36	156.566	87.62	153.23	156.571	225.49	109.16	93.87	95.88	82.61
157.745	196.47	117.63	157.738	153.04	161.3	157.753	198.3	282.25	94.57	69.55	185.4	54.19	155.56	94.568	305.29	308.16	94.571	294.59	283.6	94.567	464.82	382.41	94.567	61.61	271.44	94.569	32.14	27.71	94.57	160.72	66.05	157.734	103.01	138.41	157.738	224.5	109.3	94.57	88.45	86.95
158.913	199.99	114.08	158.908	163.84	163.37	158.921	174.42	302	95.268	71.64	206.83	58.13	153.61	95.268	435.46	479.02	95.271	297.48	262.45	95.269	439.3	322.74	95.269	86.74	281.77	95.268	33.09	25.05	95.269	181.43	69.23	158.902	77.11	123.27	158.908	195.09	125.45	95.27	68.96	84.92
160.081	217.53	127.16	160.076	152.46	178.55	160.089	197.41	261.72	95.968	72.36	195.9	52.56	134.89	95.969	313.18	467.89	95.969	275.91	282.88	95.967	356.75	314.55	95.967	81.27	252.12	95.97	29.91	22.02	95.97	200.63	70.47	160.07	86.31	133.07	160.076	223.09	127.43	95.969	88.5	84.33
161.247	244.15	109.57	161.248	177.23	163.14	161.257	180.81	250.84	96.669	78.01	198.97	52.17	152.68	96.668	304.11	453.96	96.671	254.88	258.02	96.669	234.55	253.2	96.669	85.35	286.24	96.67	33.54	29.06	96.67	202.99	77.33	161.237	78.38	138.9	161.248	217.13	111.22	96.67	82.38	83.81
162.415	232.62	109.62	162.418	175.88	186.38	162.425	178.43	210.45	97.369	67.45	221.36	54.25	132.67	97.367	314.66	360.09	97.37	239.57	247.14	97.367	165.5	228.26	97.367	88.75	258.28	97.365	32.37	39.41	97.371	193.87	74.5	162.406	71.4	144.53	162.418	220.39	117.54	97.369	74.65	78.98
163.584	220.94	100.38	163.591	182.6	198.5	163.593	179.87	219.63	98.07	68.06	210.51	53.21	152.84	98.069	418.09	412.41	98.071	277.74	285.31	98.068	140.14	175.52	98.068	82.85	247.03	98.067	53.07	133.03	98.069	190.33	62.89	163.573	84.33	151.69	163.591	209.74	122.56	98.069	82.28	88.38
164.751	225.22	130.21	164.759	169.28	182.07	164.76	243.46	270.31	98.77	66.28	229.17	40.98	135.35	98.769	338.42	377.47	98.77	263.64	263.28	98.768	107.26	187.93	98.768	102.57	235.59	98.768	68.81	154.05	98.77	177.89	47.22	164.741	90.41	162.57	164.759	190.15	102.27	98.768	83.16	81.58
165.919	229.47	104.81	165.928	166.57	185.23	165.928	182.94	226.46	99.469	56.38	234.12	50.08	138.47	99.468	263.3	337.71	99.469	245.74	264.56	99.469	97.67	160.25	99.469	88.85	260.48	99.468	71.96	165.1	99.469	167.6	30.02	165.91	93.98	142.23	165.928	216.18	129.01	99.469	90.89	80.55
167.088	236.03	113.12	167.095	172.71	154.55	167.096	185.36	249.66	100.171	57.78	253.02	50.74	136.67	100.168	205.93	315.83	100.169	241.06	329.66	100.169	97.41	150.64	100.169	105.27	232.67	100.169	67.43	182.55	100.17	156.09	28.91	167.077	80.22	161.41	167.095	206.36	120.09	100.167	74.35	87.17
168.256	207.83	109.16	168.265	195.41	161.89	168.264	163.98	237.48	100.869	64.94	248.35	60	143.21	100.868	186.44	301.23	100.869	229.26	289.62	100.868	313.34	218.23	100.868	123.9	235.6	100.869	63.38	156.97	100.869	146.86	29.77	168.246	79.15	148.73	168.265	214.67	115.02	100.869	89.01	80.63
169.424	224.07	110.13	169.433	181.27	269.12	169.432	216.42	245.97	101.571	77.68	258.91	57.63	124.88	101.569	161.63	283.17	101.569	221.83	228.48	101.568	339.81	331.58	101.568	137.32	242.55	101.569	51.41	126.9	101.569	130.7	24.36	169.414	77.27	151.81	169.433	269.29	143.49	101.567	95.79	81.54
170.592	227.25	185.66	170.601	1343.16	1073.04	170.6	192.55	227.64	102.27	84.72	256.36	61.04	156.49	102.27	137.38	259.67	102.269	242.52	252.73	102.268	323.92	336.77	102.268	124.22	282.74	102.269	40.3	100.04	102.269	125.88	26.5	170.582	80.38	151.26	170.601	1349.64	601.15	102.269	84.42	91.46
171.758	867.54	485.21	171.773	1213.37	1016.07	171.768	197.71	264.99	102.97	86.52	249	55.63	147.95	102.968	131.09	236.92	102.97	215.07	265.78	102.968	338.54	294.94	102.968	114.16	297.08	102.967	35.61	81.61	102.969	119.37	26.9	171.751	86.6	137.2	171.773	1181.88	671.45	102.969	80.97	83.88
172.927	532.5	545.53	172.941	1142.02	1113.9	172.937	190.8	224.97	103.668	78.65	236.84	62.85	146.58	103.668	145.74	220.39	103.67	246.3	254.82	103.668	300.18	255.78	103.668	125.8	294.59	103.669	33.05	69.08	103.669	110.04	26.84	172.918	95.18	161.98	172.941	1364.39	745.87	103.668	86.5	94.43
174.094	285.33	421.11	174.113	794.11	1190.97	174.103	244.25	263.64	104.367	76.19	255.65	52.13	141.37	104.369	158.13	203	104.371	246.46	236.97	104.368	196.22	210.09	104.368	116.49	348.38	104.369	34.77	54.82	104.369	97.8	31.44	174.086	95.9	165.46	174.113	1297.36	731.35	104.369	75.62	102.06
175.262	242.58	326.09	175.285	370.09	1089.24	175.271	265.45	227.08	105.067	88.39	250.64	73.03	152.33	105.069	167.55	199.79	105.069	259	236.73	105.067	128.06	177.64	105.067	119.94	360.92	105.069	32.89	48.32	105.069	98.11	25.67	175.254	89.19	149.73	175.285	984.22	615.85	105.068	88.66	112.56
176.431	232.72	272.94	176.455	213.26	826.72	176.439	250.01	236.46	105.767	101.58	267.45	52.48	143.56	105.769	166.46	184.93	105.77	273.49	255.94	105.767	122.08	138.12	105.767	100.52	331.12	105.769	30.94	40.88	105.769	94.47	26.59	176.424	86.52	148.89	176.455	561.6	359.61	105.769	83.32	113.71
177.598	190.08	257.06	177.623	193.64	384.03	177.607	185.5	239.12	106.467	304.42	464.56	57.64	138.12	106.466	159.1	189.64	106.468	250.68	250.71	106.468	113.54	128.4	106.468	106.33	322.37	106.469	33.57	33.96	106.47	84.89	26.48	177.592	78.83	121.46	177.623	321.39	183.36	106.468	82.68	108.34
178.766	217.78	192.96	178.791	160.67	249.53	178.78	183.9	237.29	107.167	335.19	558.16	60.48	147.44	107.168	171.42	174.24	107.17	259.9	254.05	107.168	342.39	205.32	107.168	99.05	303.61	107.169	34.65	32.64	107.169	78.27	27.13	178.762	69.1	128.9	178.791	258.29	152	107.168	85.16	107.33
179.934	213.56	163.57	179.959	167.8	215.88	179.95	193.69	198.29	107.869	377.13	671.39	58.78	141.93	107.867	174.79	170.19	107.87	252.59	225.86	107.867	412.42	355.69	107.867	86.63	284.81	107.865	30.42	32.85	107.869	78.16	26.45	179.932	97.27	116.11	179.959	252.28	136.36	107.869	81.64	101.34
181.102	414.12	284.81	181.127	168.87	204.95	181.119	223.6	218.04	108.568	351.21	678.19	50.2	120.42	108.567	156.18	164.35	108.57	270.86	235.86	108.567	316.08	422.47	108.567	91.24	232.26	108.567	30.78	23.47	108.567	84.41	28.93	181.103	92.89	152.44	181.127	228.4	131.45	108.567	91.76	85.12
182.271	671.87	400.02	182.295	164.38	178.07	182.287	230.07	246.74	109.268	353.82	793.82	49.82	143.58	109.267	164.04	185.96	109.271	238.04	261.81	109.267	300.82	394.2	109.267	85.21	241.49	109.269	33.13	27.03	109.268	78.08	32.65	182.273	86.99	114.2	182.295	222.53	125.72	109.268	82.06	96.02
183.438	355.84	329.95	183.464	154.28	196.18	183.455	203.9	219.35	109.969	281.64	707.71	59.18	128.12	109.968	148.67	168.34	109.97	252.97	251.84	109.968	267.73	365.34	109.968	100.75	247.4	109.969	35.2	24.73	109.969	74.69	26.87	183.443	79.43	118.58	183.464	237.3	121.5	109.969	85.65	79.45
184.606	246.21	232.77	184.633	167.42	152.13	184.623	182.71	225.31	110.669	250.36	633.88	57.78	138.82	110.668	187.55	165.29	110.67	258.72	244.64	110.668	319.07	400.99	110.668	131.9	246.18	110.669	34.52	26.11	110.67	88.64	23.34	184.613	74.05	122.72	184.633	233.6	116.92	110.669	88.7	94.38
185.774	249.14	203.44	185.799	182.39	158.18	185.791	201.12	230.28	111.367	149.18	568.37	58.48	125.96	111.369	191.88	157.63	111.37	253.93	261.89	111.367	340.76	381.08	111.367	126.75	234.56	111.37	32.38	27.54	111.369	86.3	21.85	185.783	349.61	282.77	185.799	222.27	98.07	111.369	76.63	92.08
186.941	211.82	197.72	186.967	187.36	161.12	186.96	216.58	190.74	112.069	104.13	544.15	57.9	140.28	112.069	178.06	158.24	112.07	227.62	259.87	112.067	358.86	330.72	112.067	126.99	257.51	112.068	28.12	25.65	112.07	81.14	29.01	186.951	462.52	291.19	186.967	236.17	117.62	112.069	71.57	90.29
188.109	225.61	148.36	188.135	158.53	160.36	188.128	226.09	236.82	112.768	84.35	519.72	70.37	167.46	112.767	168.58	156.96	112.77	291.32	257.92	112.768	336.25	291.5	112.768	112.05	206.05	112.768	31.92	27.23	112.77	75.69	29.33	188.119	450.31	405.38	188.135	221.89	104.25	112.769	79.15	86.22
189.277	226.54	118.86	189.303	159.52	176.32	189.295	216.06	224.28	113.47	94.63	485.03	405.7	366.09	113.468	146.97	144.4	113.469	286.42	265.56	113.467	264.57	246.85	113.467	129.55	211	113.47	28.63	25.53	113.468	91.83	24.65	189.287	340.28	406.36	189.303	213.79	115.86	113.468	76.21	84.8
190.445	211.6	97.9	190.471	155.31	182.2	190.464	189.61	207.67	114.169	69.31	390.74	357.92	358.56	114.168	133.17	163.07	114.171	340.64	282.89	114.167	218.04	211.94	114.167	102.46	221.51	114.17	30.5	26.81	114.17	86.22	30.58	190.455	132.14	303.96	190.471	223.92	121.7	114.168	78.7	87.37
191.614	237.72	124.92	191.639	164.07	195.36	191.633	166.73	223.1	114.869	75.09	388.23	286.22	451.7	114.868	144.81	140.8	114.87	342.48	306.56	114.867	162.04	205.49	114.867	105.36	335.69	114.865	31.11	25.4	114.868	91.63	27.49	191.623	84.61	250.04	191.639	239.02	115.62	114.869	75.05	74.94
192.782	217.72	130.46	192.808	150.54	165.64	192.799	151.79	225.98	115.57	75.98	342.96	218.02	484.53	115.568	130.38	146.51	115.57	396	299.03	115.567	118.78	165.73	115.567	119.85	339.75	115.568	32.03	26.17	115.568	89.02	27.93	192.791	90.65	206.25	192.808	217.02	123.93	115.57	78.53	88.65
193.95	205.87	141.29	193.976	164.13	166.54	193.967	192.12	195.61	116.268	74.7	330.55	165.57	466.84	116.269	158.77	179.64	116.27	424.83	345.33	116.267	84.43	146.15	116.267	99.87	331.32	116.269	32.62	24.14	116.269	86.01	25.4	193.96	88.85	161.59	193.976	240.51	111.7	116.268	81.24	70.63
195.118	256.82	106.33	195.142	180.48	188.55	195.135	205.24	213.29	116.968	72.01	291.32	117.37	488.54	116.968	132.75	166.84	116.97	403.48	343.25	116.968	75.83	117.8	116.968	91.76	354.47	116.97	29.25	24.04	116.97	92.02	24.75	195.127	83.42	138.19	195.142	222.4	122.01	116.97	76.45	79.14
196.285	266.1	116.84	196.31	157.4	168.83	196.302	204.94	207.55	117.669	64.28	260.54	76.49	378.75	117.668	136.44	173.23	117.669	407.45	437.06	117.668	65.04	96.8	117.668	96.12	322.96	117.67	32.07	26.7	117.669	83.77	25.46	196.3	74.56	161.11	196.31	249.3	107.91	117.67	67.9	82.75
197.454	223.01	108.47	197.479	162.64	167.64	197.471	167.6	213.26	118.369	71.1	266.42	62.76	324.18	118.367	149.65	180.09	118.369	1919.55	573.1	118.367	61.95	96.64	118.367	84.53	340.74	118.368	32.05	28.33	118.37	93.17	30.63	197.471	75.17	164.9	197.479	211.2	112.55	118.37	69.56	81.65
198.62	211.57	122.4	198.647	171.28	173.85	198.638	183.48	235.81	119.07	72.42	222.51	47.63	239.44	119.068	157.85	198.29	119.07	2412.13	833.28	119.069	66.68	81.59	119.069	87.2	295.86	119.069	29.8	30	119.07	79.9	26.12	198.639	74.91	127.43	198.647	199.04	109.18	119.068	76.82	87.76
199.788	240.05	107.88	199.815	123.31	137.8	199.806	263.49	242.45	119.77	75.06	224.61	44.43	173.53	119.768	211.76	233.88	119.77	2253.87	979.01	119.769	66.95	72.36	119.769	73.39	296.88	119.768	33.76	26.28	119.77	81.64	25.53	199.807	74.82	148.25	199.815	215.65	95.7	119.767	75.32	77.62
200.956	213.18	133.63	200.983	146.06	134.78	200.975	589.91	556.3	120.469	63.4	218.52	49.18	163.86	120.468	408.85	400.69	120.469	2418.19	1218.16	120.469	74.64	79.28	120.469	103.49	317.94	120.468	31.71	26.77	120.47	86.81	24.7	200.975	80.67	142.4	200.983	208.96	102.58	120.469	75.7	85.75
202.122	220.04	116.43	202.153	145.26	141.74	202.143	827.53	753.6	121.168	70.36	225.59	48.87	152.98	121.168	323.52	461.08	121.168	2391.86	1458.11	121.168	86.52	80.36	121.168	103.9	352.14	121.17	26.94	27.66	121.171	90.24	24.49	202.143	77.67	159.69	202.153	202.36	113.76	121.168	83.84	90.84
203.29	216.98	117.67	203.326	158.24	178.82	203.311	877.69	942.07	121.87	61.16	215.52	49.51	142.11	121.868	271.66	335.21	121.87	2302.64	1730.87	121.869	105.44	87.25	121.869	103.58	361.14	121.868	29.95	25.88	121.869	78.5	23.56	203.311	88.12	134.38	203.326	252.8	120.31	121.868	82.04	73.15
204.458	241.28	105.69	204.494	160.62	175.66	204.479	1242.37	788.19	122.57	72.76	222.07	56.74	142.74	122.568	244.28	307.53	122.569	2395.49	1856.85	122.569	108.35	99.45	122.569	115.7	335.1	122.569	27.85	25.87	122.57	94.72	25.72	204.479	97.69	119.06	204.494	244.35	110.12	122.568	76.35	77.41
205.626	228.98	91.84	205.666	177.98	184.78	205.647	750.6	1087.57	123.27	65.3	242.5	62.07	140.54	123.27	199.57	276.04	123.27	2234.61	1979.16	123.268	95.01	89.47	123.268	109.6	318.47	123.268	29.43	26.16	123.268	83.07	28.89	205.647	105.47	162.88	205.666	214.52	120.51	123.268	89.72	93.98
206.794	266.54	120.07	206.834	138.22	177.61	206.816	474.79	927.57	123.968	76.95	230.5	50.93	127.07	123.968	149.86	267.76	123.97	1707.67	1596.79	123.968	83.8	88.1	123.968	125.72	311.11	123.968	28.65	27.62	123.968	85.14	25.74	206.815	92.74	131.89	206.834	211.88	119.34	123.968	86.41	85.77
207.961	208.04	139.55	208.007	181.98	185.66	207.983	248.09	757.56	124.668	82.21	199.35	58.26	145.95	124.667	145.45	255.39	124.67	1338.19	1201.86	124.668	68.58	78.78	124.668	309.94	485.03	124.669	35.13	27.24	124.668	80.61	29.37	207.983	88.67	133.58	208.007	216.37	122	124.668	75.79	86.86
209.129	234.15	125.17	209.175	162.82	158.18	209.149	199.81	578.02	125.368	75.31	193.71	52.61	137.04	125.368	131.42	218.72	125.369	840.14	996.97	125.366	59.33	75.9	125.366	359.61	527.05	125.367	33.14	21.53	125.368	79.09	21.27	209.151	81.74	110.31	209.175	197.9	119.57	125.369	85.19	84.69
210.297	233.2	126.15	210.343	164.74	152.64	210.317	197.73	498.71	126.069	64.66	222.09	47.07	109.49	126.067	155.51	221.85	126.069	567.06	774.47	126.068	51.61	79.66	126.068	266.79	720.95	126.07	29.29	27.92	126.068	82.91	27.56	210.319	85.1	110.44	210.343	218.08	98.52	126.067	93.94	81.07
211.465	244.56	111.44	211.512	163.98	145.86	211.485	206.5	418.47	126.767	69.77	198.22	60.55	120.67	126.77	203.91	208.84	126.769	387.87	702.86	126.766	56.59	70.92	126.766	173.14	749.45	126.769	30.54	27.37	126.769	79.35	30.52	211.489	74.54	106.23	211.512	213.84	108.74	126.769	90.17	92.25
212.633	255.67	119.8	212.68	145.13	163	212.653	212.94	353.49	127.469	66.64	207.7	60.15	130.44	127.467	234.97	203.34	127.469	289.22	557.13	127.467	62.85	55.2	127.467	164.8	673.42	127.468	30	27.2	127.468	83.59	23.35	212.657	86.84	116.06	212.68	195.35	99.85	127.468	88.82	112.33
213.801	252.8	119.46	213.85	152.3	152.32	213.821	187.4	349.62	128.168	79.4	216.47	49.35	126.75	128.17	237.17	183.74	128.171	251.65	467.86	128.167	64.52	67.04	128.167	159.03	588.41	128.169	32.75	27.91	128.169	88.3	23.43	213.826	95.42	117.33	213.85	226.7	104.31	128.168	93.59	99.03
214.968	219.98	126.81	215.02	158.68	176.11	214.989	200.65	308.26	128.868	75.55	207.43	53.04	123.88	128.869	250.06	173.04	128.869	203	391.27	128.868	68.99	67.07	128.868	201.58	502.43	128.87	30	26.81	128.869	82.8	26.96	214.993	91.05	123.19	215.02	212.58	107.83	128.868	352.65	248.08
216.136	221.83	122.76	216.188	155.93	148.32	216.157	215.27	296.66	129.563	73.84	215.24	48.79	143.26	129.569	207.36	166.74	129.57	193.99	328.08	129.567	65.06	58.92	129.567	228.23	458.32	129.57	31.04	27.65	129.569	91.07	28.1	216.164	83.13	118.14	216.188	225.26	105.55	129.568	380.2	289.19
217.303	233.22	125.35	217.354	158.08	155.64	217.324	220.26	262.68	130.267	69.64	235.78	51.67	112.91	130.267	207.22	162.24	130.27	174.55	304.71	130.267	69.68	55.55	130.267	223.33	497.55	130.27	31.73	37.2	130.269	92.34	26.35	217.336	91.57	104.89	217.354	215.43	117.41	130.269	301.09	291.79
218.471	247.82	133.88	218.523	169.31	151.74	218.493	202.85	268.53	130.969	63.91	224.67	55.61	130.28	130.968	186.12	155.81	130.971	160.64	272.67	130.967	66.33	57.42	130.967	244.33	550.36	130.969	31.54	28.77	130.969	86.56	27.58	218.506	83.17	111.25	218.523	230.66	102.94	130.967	303.19	294.95
219.64	255.7	122.32	219.691	150.09	181.06	219.661	185.64	233.11	131.669	72.69	236.23	50.22	100.11	131.668	174.25	154.59	131.671	173.71	281.05	131.667	64.29	48.1	131.667	222.87	517.18	131.669	32.04	25.76	131.669	91.36	20.64	219.676	75.97	85.99	219.691	202.64	119.62	131.668	349	315.12
220.808	210.48	123.5	220.859	161.41	208.22	220.829	162.36	260.53	132.369	65.45	225.29	80.42	124.44	132.368	203.99	150.94	132.371	202.33	254.44	132.366	71.58	45.76	132.366	213.16	431.75	132.37	27.53	28.92	132.368	92.9	21.84	220.844	95.28	100.68	220.859	227.4	134.78	132.368	370.28	322.86
221.976	176.83	117.42	222.027	157.78	205.19	221.997	181.87	241.21	133.069	62.13	208.3	66.11	124.49	133.069	262.8	155.14	133.069	187.03	246.58	133.068	63.79	41.35	133.068	166.18	391.8	133.069	29.71	31.58	133.069	86.55	28.19	222.016	70.57	72.53	222.027	216.76	128.46	133.069	264.39	328.93
223.144	210.9	122.78	223.195	171.97	188.23	223.165	196.59	225.94	133.77	61.51	197.15	68.48	115.3	133.768	236.39	145.51	133.771	202.04	212.33	133.767	69.52	48.11	133.767	158.8	334.2	133.771	28.5	23.53	133.769	83.24	26.77	223.188	81.44	97.95	223.195	230.51	125.46	133.77	211.07	303.56
224.312	205.05	122.05	224.361	144.36	186.79	224.333	222.71	253.41	134.466	59.52	203.46	53.06	117.72	134.469	226.53	162.3	134.47	162.42	236.67	134.468	72.97	51.1	134.468	132.16	252.36	134.469	28.61	29.08	134.468	93.04	25.63	224.358	90.26	115.83	224.361	265.1	124.87	134.468	168.39	282.18
225.48	205.41	116.57	225.529	155.03	196.79	225.502	199.08	246.9	135.171	84.04	216.26	59.78	150.82	135.168	234.12	155.39	135.17	181.39	237.05	135.168	61.39	45.28	135.168	85.71	226.16	135.171	26.89	26.51	135.17	84.09	27.04	225.529	85.59	121.1	225.529	238.03	127.32	135.169	131.94	227.22
226.647	223.97	125.68	226.695	163.45	162.04	226.669	231.43	252.44	135.869	100.61	207.12	61.21	137.72	135.868	218.91	156.54	135.871	190.86	213.71	135.862	72.76	44.66	135.862	73.75	196.56	135.865	31.25	25.93	135.869	122.6	48.84	226.698	83.84	125.37	226.695	242.74	103.57	135.869	106.33	183.88
227.816	207.67	121.31	227.864	132.12	176.88	227.836	207.77	251.27	136.57	82.71	205.85	51.92	132.3	136.57	241.28	146.49	136.569	227.09	220.46	136.566	63.68	44.95	136.566	65.53	237.49	136.569	29.8	23.05	136.569	149.34	58.72	227.869	93.54	131.67	227.864	219.21	113.95	136.57	96	165.15
228.984	209.88	160.15	229.032	151.4	160.69	229.004	208.15	284.67	137.271	75.69	219.49	45.24	137.72	137.268	215.71	148.33	137.27	213.39	209.96	137.268	58.4	49.13	137.268	77.19	198.33	137.269	28.19	30.65	137.268	182.82	70.49	229.037	73.98	111.73	229.032	225.4	128.93	137.269	81.62	160.01
230.15	197.15	151.55	230.2	168.22	143.6	230.172	240.44	283.71	137.965	71.87	225.48	56.55	165.16	137.969	190.71	158.29	137.968	245.23	229.99	137.967	81.85	48.55	137.967	74.08	198	137.971	31.38	32.06	137.969	192.08	74.25	230.207	91.29	108.53	230.2	186.96	119.12	137.97	81.83	116.58
231.318	221.85	152.39	231.368	152.09	189.28	231.34	291.48	250.34	138.67	72.34	209.08	62.45	152.4	138.669	169.63	136.83	138.67	219.13	228.32	138.669	79.76	56.74	138.669	74.36	203.66	138.671	27.51	27.83	138.668	210.38	67.76	231.377	73.81	133.02	231.368	222.81	115.28	138.67	82.13	114.98
232.486	204.59	163.93	232.536	141.84	169.21	232.508	230.32	250.53	139.37	71.18	220.72	48.82	136.09	139.364	163.17	144.3	139.368	229.75	190.91	139.364	81.11	64.65	139.364	72.69	185.81	139.363	31.07	29.91	139.368	184.93	69.35	232.549	91.13	123.83	232.536	228.5	126.28	139.37	68.12	105.01
233.652	218.76	167.26	233.704	127.76	184.43	233.676	204.05	266.61	140.071	78.24	211.61	57.55	145.23	140.068	156.33	161.64	140.07	232.51	227.15	140.067	71.59	57.59	140.067	71.99	170.59	140.068	32.17	32.61	140.068	193.19	56.27	233.718	94.22	129.93	233.704	213.61	112.28	140.069	76.68	125.33
234.821	202.14	153.91	234.872	161.87	231.21	234.844	205.71	258.24	140.77	81.81	246.98	58.71	140.54	140.769	137.79	138.02	140.769	228.67	250.06	140.769	55.83	59.88	140.769	77.76	163.29	140.768	30.21	34.38	140.768	171.41	52.67	234.886	79.17	155.51	234.872	169.53	138.2	140.769	61.51	98.56
235.993	915.02	407.73	236.041	148.57	223.76	236.011	203.96	232.3	141.465	87.4	261.81	44.7	133.25	141.469	129.36	147.79	141.468	236.48	223.52	141.467	61.92	64.99	141.467	73.7	175.95	141.47	29.97	36.32	141.47	172.65	39.9	236.056	111.51	214.9	236.041	209.53	135.27	141.468	73.1	104.72
237.166	883.15	545.41	237.21	145.2	223.19	237.179	182.19	254.48	142.17	99.5	259.24	60.49	137.86	142.169	122.1	169.96	142.168	223.26	264.37	142.169	62.22	60.28	142.169	68.52	165.64	142.169	31.56	33.03	142.17	151.86	31.5	237.226	101.03	183.63	237.21	215.4	128.85	142.169	80.93	98.47
238.335	407.19	473.35	238.379	163.67	229.66	238.347	191.14	219.43	142.871	107.1	280.21	58.12	134.14	142.868	126.9	126.15	142.87	209.23	217.2	142.867	62.83	55.99	142.867	76.27	152.28	142.869	28.34	32.15	142.869	146.08	28.88	238.397	87.68	181.36	238.379	222.35	126.73	142.868	76.98	94.68
239.506	247.5	379.01	239.546	172.45	195.89	239.514	212.3	271.55	143.571	101.99	242.98	47.49	142.84	143.568	142.94	151.46	143.569	219.74	251.08	143.569	64.92	48.91	143.569	78.24	148.13	143.569	32.77	29.2	143.568	144.38	27.25	239.569	83.7	172.52	239.546	205.74	128.55	143.568	73.7	96.79
240.674	204.39	319.05	240.714	156.7	266.06	240.682	195.68	266.6	144.269	61.45	256.55	48.82	147	144.269	149.41	140.6	144.269	242.14	255.09	144.267	70.71	54.64	144.267	64.32	161.08	144.269	28.15	33.38	144.269	127.46	25.21	240.739	77.6	155.89	240.714	290.3	139.9	144.268	69.68	110.19
241.842	218.12	286.5	241.882	1180.06	1020.28	241.85	175.3	240.01	144.965	64.17	243.34	48.17	139.91	144.969	151.07	152.11	144.97	192.26	242.9	144.967	56.04	47.5	144.967	71.67	123.03	144.969	30.41	33.42	144.967	113.42	29.14	241.911	88.69	186.91	241.882	1161.29	568.69	144.97	73.85	92.17
243.01	223.17	205.37	243.05	1061.46	1002.11	243.017	173.66	254.43	145.67	68.16	233.44	51.02	153.86	145.669	163.5	159.08	145.669	190.87	216.4	145.668	53.2	56.76	145.668	68.42	132.14	145.669	27.07	36.06	145.669	107.03	26.8	243.083	100.48	190.91	243.05	1183.94	703.15	145.67	77.84	94.16
244.178	748	433.58	244.218	1165.99	1062.41	244.186	207.95	261.73	146.37	73.36	208.15	49.8	133.58	146.369	159.66	166.54	146.37	212.67	222.24	146.366	69.65	49.53	146.366	79.2	149.1	146.369	34.36	29.18	146.369	99.45	23.73	244.254	83.83	158.05	244.218	1371.57	785.61	146.369	73.74	80.92
245.347	555.27	446.47	245.385	364.1	895.28	245.353	281.79	278.66	147.069	60.98	230.19	56.8	145.53	147.069	187.52	146.81	147.068	233.88	256.76	147.068	60.01	51.26	147.068	83.71	146.28	147.07	32.6	33.45	147.067	105.37	26.57	245.425	71.54	126.72	245.385	822.33	527.73	147.069	77.28	88.53
246.514	259.92	394.42	246.554	177.64	620.06	246.522	232.02	269.11	147.768	255.39	388.34	48.76	148.74	147.769	163.79	149.35	147.769	230.3	239.1	147.766	65.38	46.55	147.766	90.18	145.25	147.769	31.61	29.07	147.769	91.93	25.46	246.595	84.09	126.95	246.554	407.23	288.26	147.768	67.9	88.44
247.682	230.53	323.57	247.723	168.29	342.4	247.689	223.53	283.57	148.464	306.74	561.04	55.65	150.93	148.469	180.7	164.98	148.469	207.84	274.26	148.468	71.31	52.07	148.468	98.41	165.98	148.469	27.44	30.3	148.469	99.31	25.79	247.763	85.82	149.31	247.723	281.87	174.99	148.468	63.93	84.7
248.848	247.52	276.84	248.89	146.77	207.83	248.856	267.16	312.37	149.17	252.37	613.34	49.72	120.37	149.169	251.79	165.52	149.169	199.41	293.07	149.166	63.36	43.43	149.166	128.22	168.71	149.168	29.96	31.93	149.169	90.6	26.41	248.934	95	119.35	248.89	269.38	128.49	149.168	72.91	81.66
250.016	229.05	241.54	250.058	153.32	194.6	250.024	839.38	731.51	149.87	378.22	710.11	51.44	132.28	149.868	224.47	162.29	149.869	212.58	297.71	149.863	64.67	50.94	149.863	137.91	184.2	149.864	27.51	31.76	149.869	89.73	27.69	250.106	89.54	126.88	250.058	259.9	127.57	149.868	79.01	94.37
251.184	211.49	235.26	251.226	143.97	157.4	251.192	721.89	828.97	150.569	341.37	750.46	54.39	134.07	150.568	171.63	156.31	150.569	223.75	285.54	150.567	53.82	48.67	150.567	127.49	229.18	150.57	28.72	28.15	150.568	87.28	27.09	251.274	94.56	128.66	251.226	230.42	130.46	150.568	72.53	91.77
252.352	212.43	231.36	252.394	162.23	160.15	252.36	1206.15	908.87	151.269	242.54	611.21	44.8	122.65	151.267	141.38	157.41	151.269	241.61	305.6	151.267	66.81	54.22	151.267	118.63	237.88	151.269	33.28	25.83	151.269	87.66	24.94	252.446	86.8	136.77	252.394	235.59	124.08	151.268	64.32	96.46
253.52	216.26	173.1	253.562	163.2	184.68	253.529	949.71	1083.98	151.966	164.69	531.36	45.3	160.16	151.967	152.69	168.61	151.969	249.88	298.42	151.966	66.44	55.01	151.966	116.34	249.31	151.969	29.29	26.04	151.969	90.72	23.09	253.615	85.93	139.94	253.562	234.22	116.65	151.969	79.48	89.34
254.686	204.19	160.18	254.73	165.74	203.01	254.696	513.24	1037.07	152.669	103.62	578.65	50.49	186.19	152.667	138.5	165.48	152.67	275.54	316.29	152.668	65.78	48.9	152.668	127.05	238.74	152.67	28.63	26.49	152.669	88.06	24.54	254.783	68.05	145.89	254.73	223.29	131.36	152.668	80.62	105.61
255.853	199.8	165.8	255.899	208.38	196.79	255.864	301.43	780.94	153.37	85.42	520.95	58.89	184.82	153.367	131.98	146.91	153.371	266.9	286.7	153.363	71.83	46.39	153.363	122.06	262.37	153.369	27.41	27.52	153.368	87.76	27.89	255.955	93.11	164.44	255.899	221.71	132.74	153.37	83.19	91.92
257.023	227.58	175.19	257.067	150.48	214.07	257.032	215.21	504.54	154.07	72.73	461.86	63.03	164.09	154.067	120.28	156.44	154.069	244.45	285.22	154.067	65.36	48.37	154.067	111.48	214.23	154.07	29.89	27.65	154.069	86.48	28.63	257.125	94.58	156.42	257.067	195.56	124.36	154.069	60.63	85.3
258.195	206.27	131.12	258.235	178.33	177.83	258.199	190.55	440.56	154.77	69.61	420.55	45.53	162.11	154.768	192.47	161.63	154.769	337.86	309.79	154.767	54.32	59.74	154.767	126.44	223.07	154.768	31.93	26.42	154.77	86.66	29.03	258.293	81.93	143.68	258.235	213.28	127.13	154.769	73.1	86.56
259.363	211.18	131.78	259.403	141.62	174.25	259.368	173.6	366.76	155.47	78.28	378.12	44.79	148.53	155.468	207.57	155.61	155.468	298.04	268.55	155.466	70.76	52.74	155.466	116.35	205.36	155.47	33	33.32	155.469	83.27	28.17	259.464	76.6	122.04	259.403	218.19	107.2	155.468	79.23	74.25
260.531	197.33	136.95	260.571	176.32	152.44	260.536	199.91	327.53	156.168	75.15	347.31	47.11	166.4	156.167	171.58	153.82	156.17	263.36	288.73	156.167	73.55	50.26	156.167	112.78	211.23	156.17	52.9	115.51	156.171	89.54	28.5	260.634	79.03	165.23	260.571	203.4	107.04	156.17	84.55	78.88
261.699	207.84	118.08	261.739	154.34	162.74	261.704	189.08	318.75	156.87	80.02	302.66	47.49	147.4	156.864	168.82	164.07	156.869	235.38	270.73	156.867	72.13	59.22	156.867	116.65	189.39	156.87	63.15	157.12	156.87	88.24	24.05	261.806	87.73	171.31	261.739	245.19	116.06	156.87	66.79	92.42
262.867	201.42	115.74	262.907	184.02	161.23	262.872	165.05	298.44	157.569	67.36	279.98	43.73	139	157.568	148.33	163.92	157.569	273.65	279.56	157.566	73.89	60.2	157.566	90.29	163.97	157.57	61.37	192.21	157.57	85.44	25.87	262.977	100.06	177.1	262.907	215.26	126.79	157.57	68.46	74.85
264.034	249.17	133.5	264.074	161.56	173.11	264.038	243.43	294.76	158.27	62.26	255.18	49.33	142.12	158.27	119.07	162.05	158.269	249.29	264.63	158.268	60.75	57.4	158.268	102.06	169.33	158.269	70.11	200.67	158.269	79.46	23.2	264.145	95.89	187.44	264.074	205.81	126.51	158.269	73.45	77.64
265.201	217.18	127.75	265.243	166.66	173.41	265.204	196.91	292.71	158.971	62.15	249.69	44.55	140.09	158.968	130.04	161.21	158.969	277.28	301.41	158.967	70.37	58.57	158.967	91.33	147.52	158.97	77.95	231.36	158.971	95.35	26.71	265.315	92.15	189.74	265.243	202.38	108.82	158.969	75.82	86.77
266.369	213.16	130.33	266.411	152.51	179.64	266.372	195.07	260.32	159.669	83.74	232.23	48.46	170.23	159.67	114.29	174.58	159.669	260.59	283.33	159.667	73.57	46.14	159.667	97.55	191.2	159.669	70.22	200.51	159.67	88.85	23.78	266.487	74.41	202.36	266.411	209	115.18	159.669	83.74	81.84
267.537	207.3	113.72	267.579	183.23	173.79	267.539	172.51	224.56	160.369	69.99	239.56	353.37	421.46	160.368	130.56	151.91	160.37	248.88	265.93	160.366	66.52	50.6	160.366	92.55	169.61	160.364	46.92	155.6	160.371	89.12	27.47	267.655	100.6	212.18	267.579	199.01	112.86	160.369	73.49	82.41
268.705	236.9	112.59	268.747	170.58	171.8	268.707	212.07	267.18	161.069	60.77	215.27	335.35	440.07	161.068	130.55	176.81	161.07	239.2	276.11	161.066	68.39	54.47	161.066	95.74	161.08	161.069	38.79	135.03	161.07	96.22	27.77	268.826	111.4	196.31	268.747	216.05	122.26	161.069	78.11	73.21
269.873	208.73	123.09	269.915	156.37	151.73	269.873	183.95	276.55	161.769	58.76	206.76	301.42	453.91	161.767	134.66	151.6	161.77	243.38	273.49	161.767	67.43	70.84	161.767	105.72	180.97	161.769	41.04	115.3	161.77	93.72	31.77	269.994	124.12	188.55	269.915	187.74	100.91	161.768	81.88	93.86
271.041	231.18	182.19	271.083	141.21	195.14	271.041	211.12	268.57	162.47	76.54	209.42	282.09	598.84	162.468	163.52	168.12	162.468	246.91	280.72	162.468	69.65	59.73	162.468	94.25	221.18	162.469	30.9	94.47	162.47	136.97	47.97	271.162	90.29	187.02	271.083	214.23	136.73	162.468	77.68	72.47
272.21	1038.29	439.8	272.251	157.78	187.75	272.21	204.56	271.52	163.169	63.58	196.1	200.02	638.72	163.17	170.61	167.89	163.169	252.58	248.64	163.168	68.08	57.25	163.168	94.04	211.78	163.168	33.04	81.25	163.17	162.73	57.98	272.33	89.66	164.01	272.251	216.96	119.34	163.168	83.31	84.55
273.378	432.33	469.35	273.418	159.91	205.94	273.377	208.26	247.36	163.87	67.57	193.98	100.6	551.74	163.868	160.42	139.03	163.87	244.13	287.23	163.868	62.29	59.91	163.868	99.84	218.81	163.87	33.21	68.64	163.868	185.93	63.54	273.5	84.1	163.75	273.418	191.78	122.18	163.869	65.52	90.33
274.546	252.29	302.56	274.586	162.22	215.1	274.545	181.91	247.44	164.571	77.28	209.39	75.69	465.79	164.57	156.25	154.06	164.569	251.7	288.62	164.567	61.88	64.75	164.567	85.18	214.42	164.568	32	61.69	164.568	192.32	67.03	274.668	95.07	196.34	274.586	236.79	130.46	164.568	76.76	91.48
275.716	221.39	253.33	275.755	154.6	230.16	275.713	211.48	230.67	165.271	75.51	207.5	68.42	399.49	165.267	151.83	176.24	165.271	269.57	300.26	165.267	72.52	51.86	165.267	107.98	218.58	165.268	33.04	54.91	165.27	205.39	74.68	275.841	82.44	214.49	275.755	207.38	140.14	165.268	76.87	84.73
276.884	216.71	218.39	276.923	162.02	181.04	276.881	224.96	261.96	165.969	60.07	226.23	57.64	288.51	165.968	162.82	171.03	165.969	252.41	255.93	165.968	65.72	49.84	165.968	87.41	201.75	165.967	32.56	48.37	165.969	190.72	66.92	277.009	427.23	363.37	276.923	239.88	120.51	165.969	70.99	92.39
278.052	175.52	187.98	278.091	128.62	224.5	278.049	223.08	268.88	166.667	71.74	223.68	120.98	479	166.669	126.93	170.39	166.671	221.51	252.2	166.668	82.27	48.93	166.668	86.36	196.2	166.669	29.82	39.44	166.67	180.9	52.94	278.18	478.28	321.44	278.091	206.4	129.52	166.668	75.36	84.97
279.221	200.44	194.69	279.258	157.32	229.43	279.215	224.61	244.95	167.369	62.2	211.89	160.16	460.4	167.368	117.62	156.24	167.37	235.35	249.46	167.362	79.3	45.2	167.362	91.38	191.08	167.365	28.41	36.81	167.368	182.44	45.25	279.351	444.49	388.73	279.258	222.29	120.44	167.368	83.96	93.74
280.389	215.8	174.26	280.426	159.97	219.11	280.383	186.36	231.06	168.068	60.16	202.57	76.37	368.74	168.067	121.03	172.14	168.07	218.52	262	168.066	63.14	49.31	168.066	90.66	210.8	168.069	29.7	36.01	168.068	175.03	37.29	280.521	418.44	420.48	280.426	239.09	126.79	168.068	80.45	92.72
281.557	221.11	121.44	281.594	145.42	223.23	281.551	206.43	254.69	168.768	71.25	229.47	56.88	319.04	168.769	131.56	155.01	168.771	224.65	259.52	168.766	67.68	51.04	168.766	78.14	197.15	168.768	31.49	30.99	168.768	151.66	32.29	281.689	182.88	356.6	281.594	205.68	123.34	168.769	78.01	88.91
282.724	222.18	139.53	282.76	138.93	230.6	282.719	223.19	263.74	169.468	71.52	225.88	48.12	235.09	169.469	138.17	158.19	169.469	236.2	250.73	169.466	67.31	65.78	169.466	77.63	208.08	169.468	31.54	32.5	169.47	145.4	26.75	282.859	96.14	241.01	282.76	205.69	123.42	169.469	70.22	84.99
283.89	211	125.43	283.929	144.34	195.12	283.887	218.57	264.22	170.17	64.8	232.5	49.35	214.93	170.169	139.24	186.75	170.17	286.93	276.61	170.166	75.76	46.95	170.166	89.01	189.3	170.169	34.92	35.52	170.169	139.9	25.36	284.029	89.47	240.55	283.929	213.42	111.16	170.168	74.46	91.09
285.06	222.55	141.78	285.097	142.07	206.48	285.057	222.18	239.77	170.868	57.74	196.5	55.57	199.16	170.868	139.23	164.44	170.869	276.54	291.79	170.867	68.52	62.07	170.867	81.06	178.95	170.865	25.5	31.21	170.869	133.69	33.25	285.199	98.63	293.07	285.097	222.74	122.87	170.868	79.03	94.86
286.228	225.92	122.88	286.265	158.61	229.45	286.225	226.1	257.64	171.568	68.82	229.83	54.26	203.18	171.567	120.97	156.06	171.569	259.58	298.54	171.567	70.56	62.56	171.567	96.31	184.69	171.568	28.73	30.89	171.57	128.53	24.52	286.368	84.95	217.67	286.265	213.15	119.03	171.569	81.76	102.56
287.396	238.51	142.86	287.433	142.9	210.34	287.397	226.05	238.6	172.268	66.52	216.33	44.85	191.82	172.268	145.51	155.87	172.271	285.46	279.48	172.268	68.32	56.99	172.268	96.55	190.1	172.268	31.06	29.44	172.27	112.85	28.36	287.539	87.59	165.5	287.433	195.5	131.9	172.269	65.84	113.84
288.564	1001.53	498.24	288.6	165.53	204.32	288.564	196.22	251.44	172.97	75.88	196.26	54.94	200.68	172.969	158.98	181.18	172.971	243.52	297.33	172.966	76.44	58.36	172.966	88.86	176.23	172.969	30.9	27.55	172.97	119.18	29.05	288.71	69.26	152.4	288.6	209.47	124.71	172.969	76.9	96.45
289.732	479.26	434.29	289.767	169.09	236.63	289.737	177.3	207.79	173.67	70.44	184.76	61.21	173.67	173.669	228.73	174.26	173.671	289.45	303.18	173.667	67.66	63.05	173.667	95.26	173.08	173.669	31.56	27.81	173.67	102.66	28.03	289.881	104.43	159.78	289.767	230.36	122.98	173.669	79.39	86.01
290.901	281.09	339.11	290.935	133.91	209.88	290.909	183.06	243.91	174.369	74.01	187.19	55.62	174.47	174.369	252.15	163.44	174.37	269.35	310.66	174.365	65.7	56.42	174.365	92.64	179.86	174.369	32.06	24.97	174.37	101.44	23.02	291.052	80.46	174.31	290.935	198.37	128.14	174.368	70.6	91.28
292.07	230.27	291.78	292.103	171.98	198.36	292.077	197.6	237.07	175.068	69.16	187.5	47.49	179.81	175.069	194.6	179.67	175.07	269.16	311.14	175.067	66.87	67.69	175.067	95.71	203.76	175.07	29.03	23.21	175.069	103.34	25.34	292.224	86.16	145.62	292.103	217.42	116.77	175.069	81.68	95.78
293.238	227.69	245.1	293.271	176.51	176.4	293.247	198.25	256.03	175.77	76.88	182.03	49.61	159.96	175.769	165.36	184.8	175.77	312.41	305.87	175.768	70.17	59.23	175.768	96.45	217.81	175.77	32.28	25.99	175.77	104.86	27.01	293.392	105.22	142.15	293.271	236.97	116.46	175.769	76.01	78.82
294.406	207.82	181.73	294.439	153.05	213.57	294.417	169.75	249.22	176.47	66.82	182.43	156.4	272.14	176.468	148.45	169.62	176.47	290.71	276.88	176.467	73.08	52.39	176.467	107.42	234.15	176.469	29.27	28.16	176.469	101.62	27.26	294.562	87.33	134.02	294.439	215.12	118.42	176.469	74.85	91.63
295.574	565.29	391.27	295.607	182.97	185.59	295.585	179.15	235.57	177.168	60.81	188.3	343.16	390.63	177.169	152.46	185.78	177.17	354.84	329.52	177.166	78.36	70.75	177.166	98.43	209.48	177.169	28.82	26.12	177.17	102.46	24.16	295.73	82.45	111.29	295.607	194.44	131.79	177.169	81.84	82.91
296.74	621	447.95	296.776	124.02	175.37	296.753	286.71	270.88	177.87	59.83	191.44	232.36	422.56	177.868	134.87	187.08	177.867	488.42	463.19	177.865	70.84	57.16	177.865	127.68	218.88	177.865	30.31	31.51	177.868	98.77	27.31	296.897	115.6	138.73	296.776	213.09	99.81	177.87	78.1	92.52
297.91	292.96	361.06	297.943	184.85	174.12	297.922	582.5	547.52	178.569	83.28	234.63	233.52	514.93	178.567	136.24	187.81	178.568	798.99	687.94	178.567	85.64	63.84	178.567	139.54	220.52	178.568	31.85	27.72	178.57	101.5	24.1	298.068	89.06	104.28	297.943	198.14	106.32	178.568	67.43	91.4
299.077	258.6	292.39	299.11	164.43	209.59	299.091	805.32	731.64	179.269	85.69	252.5	175.76	551.56	179.269	140.4	178.84	179.269	2478.25	775.42	179.267	88.29	62.39	179.267	130.02	204.97	179.269	31.35	26.61	179.269	94.81	27.22	299.239	79.45	118.13	299.11	193.82	120.82	179.269	78.88	94.55
									179.97	73.21	268.48	94.76	461.47	179.969	177.73	184.32	179.969	2116.26	923.18	179.968	81.81	80.59	179.968	121.14	210.45	179.969	29.76	22.62	179.969	95.91	26.03							179.97	68.02	82.77
									180.67	62.18	279.54	60.43	416.91	180.668	214.75	182.37	180.67	2250.67	1211.65	180.666	81.83	79.66	180.666	108.79	201.93	180.669	32.43	27.89	180.67	103.95	24.24							180.669	78.84	77.38
									181.368	66.31	290.33	54.52	334.72	181.367	189.64	179.46	181.37	2249.59	1394.47	181.367	105.15	81.25	181.367	98.99	171.37	181.369	32.19	27.42	181.369	115.51	38.37							181.369	75.89	77.99
									182.068	67.86	285.58	58.48	272.63	182.067	154.66	167.95	182.07	2205.97	1586.06	182.068	93.06	77.99	182.068	75.74	179.81	182.068	32.78	29.34	182.07	161.83	61.5							182.069	70.51	83.37
									182.768	57.09	300.08	63.33	253.93	182.768	145.39	179.86	182.769	2073.52	1696.27	182.768	96.39	70.45	182.768	97.63	173.81	182.769	32.7	24.73	182.77	173.29	62.74							182.769	65.37	82.3
									183.468	58.76	279.6	47.1	222.04	183.467	151.44	172.44	183.468	1662.1	1601.45	183.467	87.71	69.15	183.467	83.98	176.08	183.469	35.89	26.48	183.47	187.34	62.87							183.467	63.74	89.71
									184.168	69.42	280.65	46.1	173.84	184.168	129.36	195.35	184.17	976.16	1041.61	184.167	72.24	63.02	184.167	91.9	170.37	184.169	30.65	26.86	184.17	192.03	65.48							184.167	77.36	81.29
									184.868	75.7	291.23	52.91	186.42	184.864	151.77	178.4	184.869	644.8	769.42	184.863	79.74	64.13	184.863	91.81	195.67	184.863	31.99	25.3	184.869	168.66	54.69							184.868	77.65	84.74
									185.569	190.11	337.21	51.93	166.98	185.568	155.78	204.53	185.569	435.59	614.32	185.568	74.78	61.91	185.568	100.15	154.04	185.569	32.25	25.43	185.567	170.44	43.23							185.567	74.9	88.1
									186.27	329.8	590.5	61.36	194.44	186.268	152.39	193.66	186.268	329.3	525.45	186.268	67.62	66.77	186.268	85.08	152.57	186.269	27.4	24.25	186.268	155.6	34.91							186.268	74.71	89.54
									186.968	348.43	720.6	48.31	161.23	186.969	151.74	196.46	186.97	234.26	385.14	186.967	69.92	52.01	186.967	215.15	325.41	186.969	29.53	26.74	186.968	146.33	29.95							186.968	76.28	103.36
									187.668	364.28	797.79	65.66	157	187.669	142.42	201.44	187.67	212	327.97	187.667	79.15	58.83	187.667	257.77	409.62	187.671	32.74	30.08	187.669	133.12	31.32							187.668	66.16	94.67
									188.368	339.91	825.86	55.33	165.28	188.369	174.3	188.23	188.37	172.58	310.84	188.362	82.79	99.57	188.362	114.38	461.24	188.365	31.11	31.88	188.369	124.79	25.24							188.368	83.42	90.68
									189.068	336.14	775.7	54.72	155.82	189.067	176.66	206.19	189.07	196.16	332.2	189.066	80.23	85.31	189.066	104.32	457.92	189.071	28.94	23.87	189.067	137.12	27.04							189.068	74.14	90.91
									189.77	242.81	611.88	59.55	166.32	189.77	147.71	185.87	189.769	186.77	304.11	189.766	77.64	66.7	189.766	119.52	404.94	189.768	31.66	28.76	189.768	113.19	23.5							189.769	73.47	86.64
									190.469	167.42	536.87	56.73	176.58	190.469	156.61	170.79	190.469	171.14	279.64	190.466	82.39	61.76	190.466	115.36	379.72	190.471	26.64	25.18	190.47	109.24	24.4							190.467	78.99	97.21
									191.169	106.9	539.33	59.83	177.67	191.167	159.95	187.34	191.169	182.2	249.82	191.166	76.92	67.96	191.166	90.31	320.41	191.17	31.84	25.62	191.169	110.5	29.53							191.169	77.83	93.35
									191.868	83.67	491.69	65.25	157.81	191.864	148.72	197.69	191.87	156.17	251.73	191.863	75.42	61.15	191.863	93.08	285.32	191.869	25.92	27.65	191.869	112.41	29.02							191.869	74.22	104.33
									192.568	71.36	431.96	45.75	150.65	192.568	150.74	204.71	192.57	190.43	246.61	192.566	62.84	48.81	192.566	63.18	265.65	192.571	30	28.05	192.568	91.08	27.22							192.567	72.33	97.43
									193.268	74.99	276.29	100.83	319.49	193.268	160.36	192.77	193.27	177.93	203.61	193.267	58.43	46.31	193.267	80.16	237.63	193.269	30.37	23.32	193.269	90.76	26.77							193.269	68.76	94.89
									193.97	74.99	276.29	100.83	319.49	193.967	162.39	196.53	193.97	172.45	218.18	193.966	70.8	53.23	193.966	74.01	227.86	193.968	28.14	26.03	193.969	86.88	25.25							193.967	72.46	97.65
									194.669	74.99	276.29	100.83	319.49	194.668	172.78	194.49	194.67	170.14	247.53	194.666	69.34	51.37	194.666	84.1	200.88	194.67	29.71	26.85	194.669	90.89	27.27							194.669	74.81	94.55
									195.369	74.99	276.29	100.83	319.49	195.367	160.36	169.11	195.371	188.19	239.76	195.366	60.38	61.03	195.366	72.32	192.79	195.369	30.65	26.93	195.368	82.51	29.23							195.369	70.86	86.32
									196.068	71.11	251.51	71.21	287.75	196.071	168.98	159.36	196.069	162	221.51	196.066	73.12	56.05	196.066	84.99	188.39	196.069	28.43	28.93	196.068	93.74	24.49							196.069	84.16	90.45
									196.769	65.39	243.31	63.51	217.96	196.769	180.14	172.89	196.77	165.19	245.33	196.766	75.7	61.26	196.766	100.75	182.28	196.77	27.34	23.26	196.769	94.18	23.25							196.768	75.25	97.95
									197.47	70.69	234.16	58.91	178	197.468	167.23	162.6	197.47	198.13	232.25	197.466	64.43	51.28	197.466	94.39	175.44	197.469	31.89	25.29	197.467	74.41	25.32							197.468	81.59	90.44
									198.17	68.49	236.61	40.09	204.86	198.17	173.82	208.85	198.17	202.41	259.24	198.166	66.71	59.61	198.166	80.27	189.94	198.17	27.35	25.67	198.17	95.47	21.89							198.169	66.38	79.92
									198.868	64.02	210.29	60.63	171.33	198.869	164.9	197.99	198.87	176.3	270.44	198.867	68.39	55.85	198.867	83.6	158.62	198.869	31.72	26.31	198.868	82.67	28.54							198.87	76.69	90.67
									199.568	65.23	227.2	50.18	180.35	199.569	172.18	188.49	199.57	203.28	231.81	199.567	71.96	65.14	199.567	81.54	151.91	199.569	29.88	22.81	199.568	83.77	22.81							199.569	84.51	90.48
									200.269	76.55	232.11	62.62	254.84	200.268	163.45	189.27	200.27	184.59	260.07	200.267	78.41	58.29	200.267	81.9	145.91	200.269	29.03	24.54	200.268	87.27	29.97							200.269	82.46	86.03
									200.969	74.51	226.98	199.97	371.32	200.968	162.15	182.96	200.97	236.93	248.98	200.967	78.82	70.81	200.967	69	139.66	200.969	32.33	28.32	200.969	78.02	23.64							200.969	81.19	86.76
									201.67	75.44	223.62	119.89	381.14	201.669	171.88	194.58	201.67	220.39	259.66	201.667	68.1	62.68	201.667	77.42	137.29	201.671	28.59	28.52	201.668	78.5	24.13							201.669	76.56	91.8
									202.369	64.39	212.35	68.55	342.3	202.369	152.66	188.69	202.369	214.43	249.98	202.363	63.69	58.5	202.363	67.31	141.79	202.365	28.87	23.77	202.369	80.88	22.23							202.37	81.78	89.99
									203.071	72.63	200.76	69.49	295.3	203.068	174.36	205.81	203.069	208.91	290.52	203.066	81.48	60.28	203.066	79.32	138	203.069	31.49	29.61	203.07	80.55	29.06							203.067	75.69	85.44
									203.769	86.44	228.23	62.44	277.26	203.769	156.98	228.49	203.769	203.86	269.66	203.767	58.82	52.42	203.767	97.6	167.67	203.768	32.82	24.14	203.769	92.47	26.41							203.768	81.63	85.3
									204.471	101.28	217.67	66.98	210.86	204.469	169.53	188.83	204.468	182.17	251.6	204.466	77.15	65.4	204.466	67.18	163.01	204.468	32.06	28.54	204.469	85.27	25.71							204.47	80.26	98.42
									205.171	95.77	207.93	51.24	193.44	205.17	220.32	189.86	205.17	213.91	276.34	205.167	93.08	62.79	205.167	101.69	184.06	205.17	31.23	25.34	205.169	96.27	24.77							205.168	72.32	104.11
									205.871	74.85	230.12	50.48	184.67	205.87	202.88	192.89	205.869	239.8	267.9	205.863	74.31	64.26	205.863	98.92	172.05	205.87	30.71	28.39	205.869	94.76	25.16							205.87	80.83	106.16
									206.57	72.12	221.38	52.79	157.09	206.568	175.66	195.13	206.569	192.75	261.93	206.567	71.04	58.93	206.567	101.42	170.22	206.568	32.77	25.87	206.567	93.56	26.27							206.568	76.62	95.04
									207.272	77.5	228.51	54.29	172	207.27	180.94	193.75	207.27	212.16	289.81	207.267	81.41	73.23	207.267	86.82	182.7	207.268	30.88	28.43	207.268	95.64	25.49							207.269	75.12	116
									207.971	66.12	225.2	50.69	155.42	207.97	167.45	196.89	207.97	190.33	297.31	207.967	83.25	66.17	207.967	70.61	136.8	207.97	28.26	28.62	207.968	93.56	25.67							207.97	71.12	104.99
									208.67	82.02	205.17	57.73	174.93	208.67	164.23	200.96	208.67	186.46	309.37	208.667	94.89	80.11	208.667	87.74	163.3	208.669	31.36	24.49	208.667	93.01	31.47							208.668	75.86	120.74
									209.37	90.04	253.6	52.02	178.12	209.369	167.75	190.18	209.37	209.41	300.73	209.366	148.65	92.8	209.366	71.59	177.06	209.364	30.51	27.93	209.367	82.16	26.42							209.37	80.26	99.25
									210.069	97.45	228.86	49.4	145.11	210.069	147.55	178.05	210.07	247.71	271.8	210.067	170.01	98.01	210.067	62.57	191.23	210.068	28.01	28.73	210.069	88.04	27.57							210.068	78.68	117.23
									210.769	94.36	240.65	52.08	147.68	210.77	144.42	190.98	210.77	207.93	305.92	210.765	156.07	112.88	210.765	67.87	153.95	210.768	26.47	26.45	210.769	87.63	22.19							210.769	70.64	85.54
									211.47	95.23	234.93	46.67	147.35	211.47	152.56	213.45	211.469	212.32	289.05	211.467	135.69	91.39	211.467	57.33	164.22	211.47	30.79	25.61	211.468	85.61	29.48							211.47	77.34	87.52
									212.17	96.2	224.62	51.76	142.18	212.168	166.08	214.71	212.17	181.46	266.96	212.165	119.99	105.79	212.165	70.28	142.92	212.169	32.57	29.09	212.169	82.82	25.99							212.169	74.86	89.52
									212.869	92.96	220.55	51.94	133.14	212.868	163.09	200.3	212.871	211.99	286.55	212.865	118.39	90.01	212.865	59.89	155.32	212.865	28.58	24.34	212.869	97.93	32							212.869	75.88	94.79
									213.569	81.94	210.75	55.71	148.88	213.568	155.39	175.61	213.57	213.59	308.67	213.565	132.02	99.41	213.565	51.27	164.15	213.568	30.58	29.38	213.568	127.22	48.04							213.568	72.44	94.68
									214.269	113.32	243.16	50.84	155.02	214.268	160.3	201.89	214.27	226.93	302.51	214.266	125.67	120.2	214.266	63.05	153.24	214.27	32.35	29.28	214.269	158.91	61.88							214.27	74.52	92.84
									214.969	326.32	375.98	51.24	166.96	214.968	160.55	189.93	214.969	221.8	331.88	214.966	114.75	113.71	214.966	68.05	153.9	214.969	33.47	30.22	214.97	162.95	69.51							214.968	73.53	94.8
									215.669	284.69	463.19	43.99	148.32	215.668	145.26	177.4	215.669	246.88	306.59	215.667	91.2	101.8	215.667	74.3	161.92	215.669	27.83	22.87	215.67	168.25	65.4							215.669	80.24	96.24
									216.371	217.65	464.65	46.08	123.07	216.369	150.56	191.79	216.37	234.26	278.53	216.365	86.08	97.76	216.365	87.08	161.55	216.369	28.17	29.76	216.369	140.62	52.32							216.37	80.05	96.83
									217.069	225.37	414.5	50.87	156.68	217.067	151.88	211.46	217.07	215.51	283.54	217.067	78.83	76.27	217.067	78.11	171.4	217.069	28.75	27.67	217.07	135.07	44.7							217.07	79.89	90.97
									217.769	146.56	374.19	51.94	153.21	217.767	139.86	194.59	217.771	255.51	301.74	217.767	77.37	73.51	217.767	106.75	163.76	217.77	28.52	30.71	217.769	130.22	36.09							217.769	79.26	93.65
									218.468	92.5	390.37	48.01	155.72	218.467	151.18	178	218.468	219.68	305.89	218.467	78.52	69.62	218.467	85.13	132.71	218.47	30.55	29.21	218.469	121.31	32.22							218.47	70.74	90.32
									219.17	83.34	386.81	53.15	154.72	219.167	200.63	245.32	219.171	253.93	283.75	219.166	76.2	61.93	219.166	95.77	165.08	219.171	28.18	26.56	219.17	129.35	25.42							219.17	75.08	80.67
									219.87	84.28	357.41	46.93	170.33	219.869	406.14	441.23	219.869	270.12	287.97	219.865	85.49	60.55	219.865	106.54	211.3	219.869	29.47	30.41	219.869	103.78	30.77							219.87	69.87	79.47
									220.568	95.2	338.13	47.46	150.49	220.569	327.58	554.1	220.569	260.75	331.58	220.567	64.7	52.92	220.567	100.41	219.53	220.569	28.82	33.16	220.571	100.36	28.6							220.57	70.96	85.77
									221.27	91.46	299.75	46.53	160.84	221.268	265.9	471.66	221.269	271.88	316.73	221.266	78.74	57.64	221.266	100.56	237.73	221.269	30.04	27.35	221.269	97.3	24.42							221.27	89.38	81.2
									221.969	81.76	293.65	47.62	162.44	221.969	310.37	365.89	221.97	249.78	306.23	221.968	58.92	45.91	221.968	117.48	231.19	221.971	29.38	30.24	221.969	110.23	21.21							221.97	73.45	84.25
									222.669	75.38	261.16	44.07	140.44	222.669	233.99	357.36	222.668	240.28	322.48	222.666	63.16	48.12	222.666	76.23	246.57	222.67	31.22	29.45	222.669	94.31	25.64							222.669	71.71	83.89
									223.37	63.18	281.06	38.75	148.86	223.368	208.31	313.49	223.369	226.83	329.84	223.368	58.29	50.99	223.368	83.6	281.68	223.367	29.07	24.91	223.369	88.77	24.53							223.37	61.05	88.86
									224.07	73.72	245.24	40.71	127.77	224.068	181.23	287.62	224.068	219.59	331.38	224.068	66.07	40.28	224.068	106.66	294.31	224.07	31.48	28.66	224.069	92.56	30.05							224.069	79.94	83.87
									224.77	62.65	262.8	49.08	154.53	224.769	171.4	274.14	224.769	240.9	294.1	224.768	70.4	60.88	224.768	113.47	267.27	224.767	29.15	30.34	224.77	85.23	27.17							224.769	69.01	71.97
									225.47	95.03	270.72	49.08	146.88	225.469	146.17	281.7	225.469	223.04	299.24	225.466	67.94	53.25	225.466	117.02	298.93	225.468	29.3	21.91	225.469	88.76	27.18							225.47	72.23	86.38
									226.17	244.28	395.76	53.55	159.96	226.17	141.87	231.26	226.17	211.2	325.95	226.168	89.47	52.87	226.168	135.61	327.08	226.168	34.9	25.75	226.171	88.69	35.3							226.168	84.99	88.15
									226.87	178.18	364.48	47.37	157.84	226.868	133.8	211.24	226.87	236.12	331.34	226.867	62.61	50.88	226.867	125.95	367.23	226.868	28.31	24.05	226.869	84.98	26.81							226.868	72.83	82.31
									227.569	137.23	273.53	54.09	171.42	227.569	134.13	198.18	227.569	226.32	308.08	227.567	72.46	60.02	227.567	206.89	449.91	227.568	30.85	30.88	227.569	77.12	27							227.568	81.38	73.27
									228.271	111.72	257.05	48.2	170.39	228.269	141.71	175.31	228.27	212.06	286.03	228.267	82.25	59.48	228.267	243.86	561.23	228.27	26.89	24.26	228.269	78.72	27.51							228.269	67.8	83.71
									228.968	96.82	254.2	47.49	161.04	228.969	143.1	178.32	228.969	234.68	304.92	228.967	84.85	66.96	228.967	192.99	552	228.968	26.37	24.77	228.969	91.72	23.95							228.969	83.84	82.72
									229.669	75.18	270.53	47.39	157	229.669	158.09	180.29	229.67	208.12	312.78	229.669	75.26	69.92	229.669	155.79	508.3	229.669	28.03	25.14	229.67	87.37	29.47							229.668	82.85	88
									230.369	269.26	318.76	59.8	165.18	230.368	161.53	183.27	230.37	222.01	309.33	230.367	88.55	57.93	230.367	170.65	400.6	230.369	31.58	26.27	230.368	87.85	25.93							230.368	81.41	87.31
									231.067	256.05	365.94	45.27	159.21	231.07	152.33	191.13	231.07	207.14	353.91	231.066	75.01	57.05	231.066	124.87	366.44	231.068	30.46	25.8	231.069	90.49	25.61							231.068	72.26	87.09
									231.767	166.02	323.99	43.38	156.89	231.77	153.72	170.43	231.77	210.43	356.77	231.767	96.66	68.25	231.767	104.47	309.54	231.769	30.34	27.03	231.769	90.4	24.74							231.768	76.1	78.85
									232.469	99.99	303.01	50.46	146.68	232.469	160.6	172.11	232.47	218.2	366.22	232.467	83.56	73.66	232.467	87.12	251.03	232.469	31.37	25.97	232.469	79.94	24.56							232.468	70.8	83.57
									233.169	77.97	251.5	47.93	149.19	233.167	146.44	155.52	233.17	193.26	337.6	233.167	83.35	81.07	233.167	85.23	237.62	233.169	29.85	29.59	233.169	82.37	24.63							233.169	73.74	91.52
									233.868	72.86	244.16	52.36	151.23	233.869	179.5	165.58	233.871	212.9	361.6	233.865	75.63	70.12	233.865	68.28	246.93	233.869	29.47	26.74	233.87	88.69	19.58							233.869	80.14	72.96
									234.569	72.71	219.83	41.98	187.11	234.569	203.04	163.26	234.571	250.88	357.2	234.567	80.35	77.43	234.567	48.69	241.95	234.57	32.27	33.28	234.57	93.5	27.2							234.57	67.18	84.28
									235.268	73.15	206.75	53.26	164.53	235.268	216.57	145.6	235.27	261.23	344.67	235.267	82.1	67.27	235.267	58.48	254.06	235.268	31.44	26.55	235.269	134.96	53.72							235.268	79.08	82.97
									235.968	73.02	198.1	41.93	181.32	235.968	196.92	162.19	235.971	286.96	418.62	235.966	75.25	70.01	235.966	71.62	242.28	235.969	26.74	24.98	235.969	172.59	56.65							235.969	81.65	84.15
									236.668	62.62	177.4	44.74	168.77	236.667	177.23	148.84	236.671	301.17	423.72	236.667	68.36	67.61	236.667	59.06	246.05	236.669	28.18	26.7	236.669	167.67	67.16							236.669	73.55	75.22
									237.37	70.62	187.46	45.78	157.4	237.368	162.82	156.69	237.37	318.88	393.48	237.362	74.59	63.36	237.362	74.51	212.49	237.369	27.05	26.5	237.369	160.05	61.36							237.368	75.39	83.86
									238.068	70.22	173.98	48.45	139.07	238.067	181.81	143.1	238.07	313.41	423.65	238.066	76.15	66.31	238.066	63.43	214.69	238.069	31.06	25.7	238.069	148.86	56.5							238.068	69.85	78.82
									238.768	71.66	167.96	49.75	154.19	238.767	187.58	160.51	238.771	299.83	416.25	238.767	77.75	55.41	238.767	69.6	195.66	238.769	27.72	27.83	238.769	152.26	48.35							238.769	75.15	77.1
									239.469	75.66	183.46	39.66	189.7	239.467	184.76	153.77	239.47	253.71	417.67	239.466	56.94	52.82	239.466	80.37	162.34	239.469	30.43	30.74	239.469	140.56	31.92							239.468	71.01	78.19
									240.169	78.04	172.93	50.38	164.26	240.167	187.21	134.32	240.171	231.32	379.24	240.168	80.92	55.15	240.168	93.01	172.55	240.17	29.21	28.5	240.169	150.18	29.32							240.17	73.93	76.33
									240.869	73.88	164.13	49.85	180.23	240.868	191.4	124.48	240.871	224.01	399.51	240.862	86.45	66.82	240.862	94.96	169.84	240.87	31.18	28.86	240.869	136.27	25.15							240.87	90.99	84.35
									241.569	75.65	180.17	47.76	181.81	241.568	175.2	151.61	241.57	230.93	425.37	241.566	80.08	64.18	241.566	78.48	165.66	241.57	31.38	27.19	241.568	120.54	28.81							241.568	75.21	82.35
									242.269	79.33	183.36	42.46	163.58	242.267	195.96	150.34	242.27	203.39	361.37	242.266	86.82	58.98	242.266	94.86	160.27	242.27	33.25	28.67	242.27	105.51	21.54							242.268	82.36	90.08
									242.969	64.85	171.04	48.98	168.74	242.967	177.13	133.85	242.971	220.52	341.61	242.967	94.08	65.67	242.967	94.61	160.62	242.97	29.5	25.58	242.97	102.79	27.41							242.97	72.3	89.67
									243.669	83.17	167.67	38.12	193.47	243.668	156.7	158.52	243.669	205.77	326.69	243.667	84.35	56.42	243.667	109.38	168.71	243.67	34.16	30.96	243.67	100.22	22.39							243.67	76.99	88.51
									244.368	99.53	186.11	49.06	172.02	244.368	175.53	164.46	244.37	185.39	325.53	244.367	88.74	58.58	244.367	119.73	163.15	244.371	33.64	26.86	244.37	96.14	24.86							244.369	83.42	81.49
									245.069	91.81	196.29	48.81	153.89	245.068	192.96	177.94	245.07	178.28	329.98	245.065	96.44	71.23	245.065	111.67	155.8	245.068	30.53	29.29	245.07	98.4	27.95							245.068	77.24	77.77
									245.77	77.53	170.24	44.09	155.32	245.768	190.13	199.2	245.769	177.33	314.24	245.767	97.72	63.8	245.767	133.64	176.97	245.768	31.2	33.36	245.771	95.88	19.96							245.769	87.76	82.22
									246.47	73.88	170.76	47	162.56	246.468	162.48	178.66	246.469	205.52	310.81	246.468	85.99	62.79	246.468	109.22	176.9	246.469	29.75	28.21	246.47	95.95	25.84							246.469	87.21	80.72
									247.17	65.09	175.51	45.13	186	247.167	139.86	171.36	247.171	205.01	356.93	247.168	104.93	70.17	247.168	93.65	201.64	247.168	29.85	34.18	247.171	85.48	26.18							247.169	68.06	80.42
									247.868	85.17	177.57	42.74	171.05	247.868	145.98	187.14	247.87	219.8	332.43	247.867	95.5	78.69	247.867	74.9	171.02	247.868	30.33	29.97	247.869	88.73	26.23							247.869	87.65	88.3
									248.569	107.31	180.24	41.98	160.11	248.569	138.03	183.66	248.57	172.74	293.87	248.566	88.49	60.27	248.566	86.28	193.56	248.569	32.81	29.01	248.569	90.14	28.19							248.569	83.26	88.17
									249.269	303.63	351.03	47.74	167.96	249.269	156.47	164.11	249.269	212.7	321.05	249.268	82.47	64.28	249.268	66.49	215.84	249.269	31.68	36.06	249.267	85.57	23.12							249.268	74.53	91.3
									249.97	254.42	381.57	42.24	160.63	249.969	146.98	166.46	249.969	211.94	309.27	249.967	71.67	65.57	249.967	83.28	226.58	249.97	30.35	32.7	249.969	82.53	27.05							249.969	73.77	91.42
									250.669	223.66	388.54	54.26	172.26	250.669	145.94	170.69	250.671	183.55	292.1	250.667	74.34	57.55	250.667	66.3	236.74	250.67	28.9	34.35	250.67	97.75	25.53							250.667	80.21	80.55
									251.368	210.9	324.01	42.92	184.67	251.369	190.53	169.26	251.37	191.12	309.37	251.365	79.87	57.46	251.365	77.75	240.32	251.369	30.6	33.84	251.368	88.25	28.05							251.369	83.54	73.66
									252.068	147.43	312.58	39.88	155.79	252.069	202.79	186.49	252.07	208.01	335.54	252.067	73.71	48.94	252.067	75.43	217.84	252.07	29.3	33.46	252.067	82.41	28.4							252.069	76.61	84.58
									252.768	110.86	293.31	47.85	183.51	252.768	163.32	174.71	252.77	235.26	316.58	252.768	65.85	62.08	252.768	63.71	208.78	252.768	30.59	32.8	252.769	92.84	24.57							252.769	94.7	88.99
									253.468	89.61	285.09	50.27	184.21	253.467	154.18	175.51	253.469	203.55	307.3	253.467	71.24	54.23	253.467	64.29	203.59	253.468	25.69	31.7	253.469	96.6	25.74							253.469	79.34	93.37
									254.168	83.94	276.18	47.71	182.7	254.169	147.21	171.39	254.169	208.48	306.24	254.165	65.75	58.51	254.165	68.48	185.72	254.169	27.08	30.24	254.169	89.9	26.05							254.169	84.09	77.52
									254.867	75.34	256.14	60.7	175.35	254.866	136.07	182.25	254.87	208.38	320.67	254.865	70.82	46.51	254.865	62.77	163.65	254.869	32.72	32.57	254.869	89.76	25.58							254.869	87.38	89.45
									255.568	86.42	255.2	44.63	167.75	255.566	135.06	158.08	255.57	190.81	303.91	255.565	57.66	47.34	255.565	58.05	192.39	255.57	29.12	33.85	255.569	82.31	30.6							255.569	82.64	78.23
									256.269	73.74	230.19	95.18	186.46	256.268	131.53	176.45	256.271	179.59	295.98	256.267	77.45	49.22	256.267	70.34	148.75	256.269	28.11	31.06	256.269	87.92	24.95							256.268	88.73	82.42
									256.969	81.07	233.08	51.55	179.39	256.968	150.72	188.41	256.971	214.68	297.69	256.967	72.37	64.48	256.967	52.68	147.23	256.97	33.47	29.66	256.969	99.48	25.47							256.969	87.05	91.73
									257.669	72.85	213.05	43.06	184.84	257.67	140.55	196.86	257.671	194.77	341.46	257.667	74.96	69.05	257.667	45.29	145.27	257.669	29.62	29.08	257.671	85.07	24.39							257.669	75.45	91.34
									258.369	69.54	186.58	49.71	171.42	258.368	156.12	211.27	258.37	234.29	358.24	258.361	76.27	60.31	258.361	58.93	149.58	258.371	30	35.4	258.369	86.77	26.53							258.369	87.5	88.81
									259.07	66.98	179.39	46.63	174.18	259.07	181.68	215.87	259.07	225.48	320.29	259.066	70.54	56.35	259.066	68.41	147.73	259.069	32.74	29.53	259.069	87.7	29.01							259.069	71.61	90.27
									259.769	78.6	169.25	37.42	179	259.768	203.82	223.13	259.771	211.64	321.88	259.768	61.23	60.48	259.768	62.81	132.31	259.77	29.29	35.83	259.77	87.93	23.18							259.768	67.91	85.94
									260.468	106.53	177.15	49.97	162.95	260.468	196.82	211.84	260.47	215.26	296.4	260.466	57.12	59.64	260.466	62.99	135.3	260.47	51.17	100.54	260.468	91.02	32.56							260.468	81.07	83.4
									261.168	96.69	154.21	44.48	191.53	261.169	174.58	199.21	261.171	236.38	364.19	261.166	76.85	59.09	261.166	74.06	164.18	261.171	62.89	159.91	261.17	79.03	31.26							261.169	78.19	82.02
									261.867	77.2	163.47	46.15	197.74	261.869	155.97	189.82	261.871	235.57	331.89	261.862	64.29	60.96	261.862	65.58	154.93	261.871	68.66	186.42	261.868	94.15	25.99							261.868	80.33	84.19
									262.57	71.84	151.12	97.88	190.32	262.569	120.56	172.16	262.569	217.78	312.59	262.565	67.94	59.15	262.565	67.56	148.2	262.57	71.79	194.94	262.569	93.11	27.71							262.568	74.74	89.41
									263.269	67.4	171.95	65.89	166.46	263.269	129.83	174.64	263.271	227.77	314.92	263.268	71.92	55.61	263.268	66.3	143.06	263.27	79.21	187.18	263.269	85.46	27.8							263.268	73.29	80.08
									263.97	67.56	162.44	50.45	170.25	263.969	136.87	184.21	263.969	195.78	307.89	263.967	71.14	57.18	263.967	66.97	140.6	263.97	74.81	174.3	263.968	111.52	36.58							263.97	78.68	75.13
									264.67	59.28	157.77	37.91	161.25	264.67	180.89	208.42	264.669	178.83	291.65	264.666	72.45	51.6	264.666	85.05	186.34	264.67	51.32	155.8	264.669	136.93	51.23							264.668	69.03	82.58
									265.37	63.72	150.47	47.12	157.19	265.369	151.77	229.07	265.369	214.8	318.06	265.366	73.02	63.44	265.366	80.89	172.64	265.368	41.36	130.12	265.369	163.46	64.32							265.37	80.59	86.69
									266.07	86.68	171.42	50.8	145.26	266.069	155.17	235.15	266.07	211.81	305.27	266.066	60.18	60.43	266.066	88.35	207.38	266.068	42.52	107.29	266.069	174.04	64.84							266.068	84.31	85.82
									266.771	76.95	146.19	44.04	162.77	266.769	145.98	219.21	266.771	189.43	309.85	266.768	72.92	61.91	266.768	87.52	219.93	266.769	34.37	94.63	266.769	179.85	61.62							266.769	75.86	84.52
									267.47	76.5	186.51	43	130	267.469	145.64	213.01	267.469	212.43	302.06	267.466	62.75	57.03	267.466	76.02	236.96	267.47	29.76	85.43	267.469	167.67	67.4							267.468	82.27	93.35
									268.172	66.42	164.53	45.27	164.75	268.169	137.26	210.6	268.169	201.9	299.39	268.168	70.64	44.87	268.168	95.37	255.01	268.169	31.04	70.95	268.17	172.43	56.68							268.169	86.25	81.16
									268.87	70.76	183.62	42.69	154.77	268.87	157.58	210.21	268.869	206.62	306.33	268.867	75.61	54.38	268.867	128.97	333.89	268.868	32.67	64.31	268.87	176.49	39.61							268.87	76.69	90.2
									269.57	61.86	194.16	42.67	176.46	269.569	173.28	202.41	269.569	205.3	310.28	269.567	68.57	57.82	269.567	151.18	355.81	269.568	30.76	49.77	269.57	157.5	36.66							269.568	76.33	92.76
									270.27	67.92	195.18	36.29	160.96	270.27	171.55	204.18	270.269	215.62	300.59	270.266	72.95	52.47	270.266	164.59	418.95	270.268	34.47	49.35	270.268	146.8	37.46							270.269	84.41	77.55
									270.971	82.21	205.89	38.97	178.77	270.969	177.35	202.84	270.969	242.62	313.4	270.968	70.53	49.95	270.968	162.46	448.52	270.97	26.72	42.97	270.968	132.22	33.96							270.968	84.42	75.52
									271.669	85.8	174.45	38.73	156.67	271.671	224.67	199.76	271.67	219.77	303.86	271.666	78.89	49.04	271.666	128.97	430.7	271.67	29.15	39.53	271.669	135.27	29.23							271.668	76.84	93.25
									272.368	75.74	203.55	47.57	179.84	272.369	216.88	186.49	272.369	237.93	300.47	272.363	61.99	46.92	272.363	135.1	368.42	272.37	30.08	45.23	272.369	131.54	25.44							272.369	74.25	89.17
									273.069	69.28	211.68	36.74	148.23	273.069	277.44	175.36	273.069	232.8	308.46	273.064	81.35	54.42	273.064	124.78	357.94	273.068	29.67	36.95	273.068	113.82	29.53							273.07	77.43	77.39
									273.769	79.72	205.46	40.11	146.72	273.776	281.74	185.57	273.769	186.99	324.39	273.765	74.92	52.48	273.765	109.2	323.07	273.769	30.21	34.24	273.769	101.23	27.29							273.769	83.34	101.52
									274.469	76.6	207.14	42.51	164.51	274.474	248.26	193.95	274.469	186.9	291.25	274.465	102.27	68.17	274.465	95.24	309.38	274.468	30.2	29.58	274.468	97.38	26.2							274.469	78.3	89.85
									275.169	77.37	194.02	40.09	171.02	275.17	227.36	190.53	275.169	167.3	305.14	275.166	92.57	66.69	275.166	79.13	308.24	275.17	27.94	35.63	275.168	101.06	27.49							275.169	72.14	80.9
									275.869	69.69	187.73	47.06	156.75	275.87	174.4	205.94	275.87	174.58	269.03	275.862	86.52	61.36	275.862	81.69	306.71	275.87	29.58	33.13	275.868	99.09	27.63							275.87	72.88	84.09
									276.57	60.85	208.58	49.01	141.96	276.569	164.28	166.86	276.57	170.75	272.97	276.566	93.61	69.75	276.566	66.57	295.52	276.568	31.79	31.08	276.569	105.15	26.56							276.57	78.81	82.74
									277.269	63.71	194.58	42.02	130.72	277.269	167.99	181.11	277.269	187.09	291.59	277.266	92.9	79.34	277.266	69.13	285.67	277.27	28.24	38.26	277.267	101.8	28.5							277.269	77.69	86.1
									277.97	91.9	218.91	43.45	163.26	277.967	188.12	176.19	277.97	164.22	313.18	277.965	76.32	70.65	277.965	71.85	224.04	277.971	33.03	30.36	277.97	96.82	23.4							277.969	91.54	89.08
									278.669	95.18	198.81	42.58	162.25	278.669	183.93	198.46	278.67	186.96	314.35	278.667	70.61	66.58	278.667	86.14	221.3	278.669	27.94	30.89	278.67	90.54	23.85							278.669	78.7	90.87
									279.369	76.21	222.51	40.75	142.56	279.367	194.7	230.81	279.366	187.84	319.6	279.366	65.71	64.28	279.366	79.42	210.32	279.37	34.3	30.89	279.369	82.43	21.45							279.372	68.4	90.15
									280.068	75.87	232.4	41.31	147.63	280.069	183.53	226.44	280.07	213.26	325.65	280.065	67.54	61.68	280.065	75.76	181.56	280.068	28.59	28.03	280.07	89.18	27.7							280.07	73.94	86.44
									280.768	89.56	254.73	46.91	152.61	280.768	163.41	216.04	280.77	170.83	307.58	280.766	76.56	56.67	280.766	72.66	186.39	280.768	29.33	29.38	280.77	88.63	23.48							280.768	73.48	85.18
									281.469	86.41	241.46	39.49	157.39	281.469	151.4	194.23	281.47	186.94	310.8	281.466	69.34	60.8	281.466	56.95	153.95	281.47	26.92	34.92	281.47	81.24	25.01							281.47	82.03	89.44
									282.17	73.28	235.6	49.46	155.47	282.169	199.09	201.31	282.171	186.71	322.43	282.167	67.99	72.77	282.167	72.32	165.66	282.17	30.2	29.8	282.17	79.61	28.51							282.169	75.18	83.74
									282.869	64.88	216.5	40.66	164.18	282.867	197.13	180.31	282.87	188.64	311.49	282.865	71.66	55.9	282.865	60.65	186.88	282.87	30.48	35.05	282.87	93.3	25.27							282.87	74.09	90.32
									283.569	73.75	230.62	48.26	165.28	283.569	177.91	164.22	283.569	177.13	315.66	283.565	79.55	54.48	283.565	68.01	171.23	283.568	31.23	30.58	283.571	88.08	24.35							283.569	70.91	85.54
									284.269	74.24	226.62	40.12	160.05	284.268	182.33	178.73	284.269	174.68	325.65	284.266	68.4	49.16	284.266	65.15	172.18	284.271	32.59	27.8	284.27	93.82	25.37							284.269	77.68	92.52
									284.971	172.53	270.12	41.58	157.54	284.968	178.96	172.29	284.97	163.93	337.91	284.966	90.48	65.32	284.966	54.78	162.23	284.97	29.82	28.64	284.971	91.19	24.84							284.969	83.51	92.12
									285.669	356.5	520.5	44.51	146.54	285.669	157.29	165.24	285.668	203.26	335.42	285.666	77.52	65.69	285.666	62.84	160.18	285.67	32.87	32.89	285.671	86.55	31.8							285.669	77.14	79.72
									286.369	331.61	585.36	44.79	154.84	286.368	151.75	160.16	286.37	202.46	332.84	286.367	76.75	58	286.367	60	157.16	286.368	29.24	34.02	286.371	81.81	31.38							286.37	77.77	85.36
									287.069	360.59	678.36	47.25	143.88	287.069	141.83	164.07	287.068	199.59	315.53	287.067	73.79	63.65	287.067	52.69	155.68	287.07	29.96	24.94	287.069	85.11	24.11							287.068	76.07	82.3
									287.771	312.6	688.53	59.42	142	287.767	172.6	164.63	287.77	183.04	333.59	287.767	74.07	66.92	287.767	54.18	128.78	287.768	25.79	25.19	287.771	80.69	28.71							287.769	84.79	91.87
									288.47	313.07	719.46	36.7	160.33	288.469	167.87	171.93	288.468	196.32	317.42	288.468	66.5	62.69	288.468	78.2	133.42	288.47	28.27	27.58	288.471	91.43	28.64							288.469	75.98	86.18
									289.169	281.53	623.01	42.22	150.39	289.169	154.67	191.93	289.17	152.14	299.91	289.166	89.35	76.32	289.166	89.25	171.44	289.169	28.45	30.12	289.17	101.27	32.29							289.168	77.23	91.62
									289.879	231.85	513.28	45.58	151.46	289.869	159.13	185.6	289.87	189.2	317.53	289.866	74.37	71.81	289.866	119.89	183.15	289.868	31.89	28	289.87	127.11	61.42							289.868	70.52	90.18
									290.568	161.38	464.13	45.58	131.96	290.57	172.88	182.34	290.569	197.12	284.99	290.567	69.71	59.23	290.567	112.45	193.59	290.569	31.74	28.15	290.568	142.7	57.77							290.568	81.01	100.58
									291.27	103.05	441.08	43.06	160.4	291.269	168.21	192.55	291.27	182.28	285.34	291.266	69.54	59.13	291.266	138.48	199.05	291.272	29.38	30.56	291.27	163.52	69.12							291.268	78.79	90.85
									291.969	76.47	366.38	39.48	155.18	291.969	185.96	194.09	291.97	177.72	283.35	291.966	75.32	55.01	291.966	139.9	181.61	291.972	27.5	26.71	291.968	158.8	59.73							291.968	86.02	93.18
									292.669	65.86	320.35	40.55	149.07	292.668	179.97	215.41	292.671	204.06	322.29	292.666	131.86	100.2	292.666	115.09	168.63	292.669	31.88	28.57	292.671	145.75	58.92							292.669	87.49	104.17
									293.368	66.79	259.13	44.49	154.96	293.369	174.71	188.28	293.37	194.1	290.9	293.36	145.87	96.7	293.36	116.16	170.61	293.369	30.68	29.8	293.37	136.37	49.37							293.369	76.31	96.67
									294.07	70.09	254.02	50.34	152.65	294.069	157.61	171.34	294.069	192.87	311.13	294.064	100.91	89.55	294.064	100.82	172.42	294.068	29.33	26.8	294.069	141.62	38.95							294.068	74.25	91.95
									294.769	70.09	215.69	45.2	166.26	294.77	166	175.5	294.77	194.26	298.25	294.767	123.23	91.97	294.767	92.32	164.9	294.768	28.4	28.55	294.768	135.24	35.81							294.769	83.54	86.47
									295.469	78.55	216.79	46.15	161.12	295.468	169.76	168.31	295.469	167.07	321.65	295.464	94.94	88.76	295.464	89.58	176.15	295.468	31.73	28.75	295.47	134.07	27.16							295.469	79.81	97.45
									296.169	73.31	221.95	50.27	163.18	296.169	181.02	167.49	296.171	159.87	315.88	296.167	85.29	80.56	296.167	87.28	166.06	296.17	28.69	30.18	296.169	120.31	27.58							296.168	79.72	106.43
									296.869	71.88	203.78	44.03	146.63	296.868	175.67	167.07	296.87	170.45	310.81	296.862	73.32	68.78	296.862	79.19	170.44	296.87	26.47	28.97	296.869	114.77	24.31							296.868	78.82	99.45
									297.57	68.31	188.71	34.44	193.61	297.567	197.29	161.31	297.57	187.81	293.94	297.565	82.51	72.73	297.565	87.41	150.74	297.568	28.39	27.33	297.568	113.36	22.84							297.568	76.78	86.38
									298.264	65.74	195.13	38.4	172.28	298.268	200.23	191.9	298.271	196.81	276.92	298.266	71.92	73.88	298.266	73.69	140.34	298.27	32.51	26.99	298.269	105.78	24.96							298.27	76.17	99.72
									298.965	61.55	175.73	38.45	182.4	298.968	210.14	190.12	298.971	156.7	326.03	298.967	66.65	61.12	298.967	84.51	198.54	298.97	28.93	32.04	298.969	102.47	27.54							298.969	81.43	94.89
									299.669	107.97	205.03	43.82	181.89	299.668	206.01	191.95	299.67	186.04	296.13	299.665	71.48	57.89	299.665	85.36	215.97	299.67	29.48	31.12	299.669	117.9	23.74							299.67	78.6	101.23
