# Supplementary material for: The gut contractile organoid for studying the gut motility regulated by coordinating signals between interstitial cells of Cajal and smooth muscles
Source: eLife. 2025 Aug 22;13:RP97860. doi: 10.7554/eLife.97860 (PMC12373395; doi:10.7554/eLife.97860)
Supplement: Figure 5—figure supplement 1—source data 1. [file elife-97860-fig5-figsupp1-data1.xlsx]

## Sheet: Figure 5-supplement 1A
Before		CBX100uM
Time [s]	#4 (TD)	Time [s]_CBX	#4 (TD)
-0.001	268.77	0.066	384.12
0.768	263.3	0.77	385.48
1.466	250.58	1.466	387.84
2.168	244.35	2.165	388.42
2.87	242.86	2.869	383.03
3.568	240.49	3.57	382.91
4.264	241.08	4.269	383.97
4.965	240.52	4.968	388.46
5.671	238.82	5.668	383.6
6.369	239.11	6.37	389.92
7.069	236.93	7.069	401.16
7.77	237.3	7.769	391.82
8.466	237.05	8.468	391.24
9.169	236.53	9.169	389.84
9.869	235.78	9.864	393.05
10.57	236.07	10.569	392.25
11.27	236.77	11.269	392.47
11.968	236.2	11.969	392.85
12.668	238.1	12.665	393.94
13.368	238.28	13.369	395.6
14.064	235.63	14.066	395.35
14.767	235.21	14.768	399.66
15.467	235.44	15.469	394.76
16.167	235.61	16.169	394.9
16.868	234.98	16.869	397.82
17.568	235.84	17.569	388.96
18.264	235.82	18.269	393.04
18.964	235.9	18.97	397.58
19.667	257.12	19.668	397.78
20.367	267.89	20.369	397.71
21.07	264.73	21.065	398.89
21.768	249.59	21.769	399.52
22.47	245	22.469	399.14
23.17	241.49	23.171	399.46
23.868	240.88	23.869	400.07
24.568	239.15	24.568	398.6
25.269	239.31	25.272	402.93
25.968	239.17	25.969	399.67
26.669	238.74	26.667	403.85
27.368	238.71	27.367	398.52
28.068	238.88	28.067	392.5
28.768	238.5	28.767	395.81
29.468	237.93	29.469	398.71
30.168	238.47	30.167	400.42
30.868	238.13	30.868	400.09
31.569	237.12	31.569	396.93
32.268	237.28	32.27	398.42
32.969	237.72	32.968	399.46
33.669	236.55	33.669	401.02
34.369	238.33	34.367	402.54
35.068	237.85	35.069	405.2
35.768	238.16	35.769	407.66
36.467	237.13	36.468	407.99
37.168	238.41	37.169	404.94
37.869	264.89	37.869	381.99
38.567	267.78	38.569	353.46
39.267	268.85	39.269	335.93
39.969	257.48	39.969	304.65
40.669	247.6	40.669	312.7
41.367	244.82	41.369	318.52
42.068	242.41	42.07	331.37
42.768	242.38	42.769	338.08
43.469	241.5	43.469	350.44
44.169	240.75	44.169	360.41
44.87	240.88	44.869	374.55
45.568	240.34	45.569	376.21
46.27	239.26	46.267	380.61
46.969	239.06	46.968	376.27
47.668	238.4	47.667	380.7
48.369	238.07	48.367	380.87
49.068	238.64	49.069	384.11
49.768	239.29	49.769	386.29
50.468	237.59	50.467	388.2
51.17	237.88	51.167	388.84
51.868	238.22	51.867	390.43
52.57	238.1	52.568	389.45
53.268	237.68	53.269	395.08
53.969	238.01	53.968	390.02
54.668	237.54	54.668	390.15
55.37	238.63	55.368	394.63
56.07	236.68	56.067	395.82
56.768	239.5	56.768	396.74
57.468	247.5	57.469	394.83
58.168	274.4	58.168	396.32
58.868	271.44	58.869	398.64
59.569	256.51	59.568	401.67
60.268	246.24	60.269	398.04
60.968	242.78	60.969	400.01
61.668	242.21	61.669	400.95
62.368	240.85	62.369	407.69
63.068	240.5	63.069	404.88
63.769	238.97	63.769	402.78
64.469	237.89	64.468	404.01
65.168	239.53	65.17	404.34
65.868	238.98	65.868	402.54
66.568	239.49	66.568	401.23
67.268	238.42	67.27	400.36
67.968	238.3	67.969	399.51
68.668	238.59	68.669	399.24
69.37	238.99	69.368	386.14
70.069	238.74	70.069	350.63
70.768	236.86	70.769	328.35
71.468	238.17	71.469	307.47
72.168	237.29	72.169	317.15
72.87	236.49	72.869	330.42
73.569	237.21	73.569	345.9
74.269	237.11	74.269	353.6
74.97	236.8	74.97	362.59
75.669	239.8	75.668	365.83
76.368	239.9	76.368	370.79
77.07	239.15	77.07	374.78
77.764	262.75	77.77	379.89
78.468	271.28	78.469	380.99
79.168	271.43	79.169	380.04
79.868	256.59	79.869	382.08
80.569	244.83	80.569	385.39
81.269	244.97	81.269	386.8
81.967	242.41	81.969	389.94
82.669	241.28	82.669	391.47
83.369	239.71	83.369	392.41
84.067	240.13	84.068	388.32
84.767	240.03	84.768	382.32
85.468	239.61	85.469	388.9
86.169	240.04	86.169	394.18
86.868	238.74	86.869	396.42
87.568	239.06	87.569	398.68
88.268	238.1	88.267	387.69
88.968	239.11	88.969	391.39
89.668	238.77	89.669	364.47
90.368	247.04	90.369	334.08
91.069	268.33	91.068	334.7
91.769	269.06	91.769	349.1
92.468	257.3	92.469	358.65
93.168	243.19	93.167	369.15
93.868	242.99	93.869	376.27
94.569	241.81	94.567	375.7
95.269	240.39	95.269	378.24
95.965	240.33	95.968	383.93
96.665	240.44	96.669	383.83
97.37	238.96	97.368	386.78
98.07	240.23	98.068	388.37
98.764	240.19	98.768	392.41
99.464	239.05	99.468	396.43
100.168	240.85	100.17	359.13
100.868	240.17	100.868	333.34
101.568	239.65	101.568	343.88
102.268	239.47	102.269	360.16
102.965	239.42	102.969	369.2
103.667	239.73	103.669	373.08
104.37	238.58	104.369	374.24
105.068	239.64	105.069	378.23
105.769	239.31	105.769	380.57
106.466	239.46	106.468	384.01
107.17	238.38	107.168	388.11
107.869	238.09	107.869	390.17
108.57	237.98	108.567	390.51
109.268	239.34	109.269	392.35
109.966	241.05	109.969	390.44
110.668	241.19	110.667	393.08
111.37	239.46	111.367	394.36
112.069	238.09	112.068	392.9
112.769	239.37	112.769	389.63
113.465	237.58	113.468	367.2
114.169	242.95	114.168	347.32
114.867	266.38	114.868	353.06
115.569	272.81	115.568	364.81
116.269	266.29	116.268	372.16
116.967	252.82	116.968	376.54
117.67	245.56	117.668	377.73
118.371	244.01	118.368	379.08
119.07	241.88	119.069	385.12
119.769	241.12	119.767	386.71
120.465	241.41	120.469	387.65
121.169	241.23	121.168	388.67
121.869	240.87	121.87	391.09
122.569	240.2	122.566	391.6
123.269	240.46	123.269	391.2
123.966	239.64	123.97	396.95
124.668	239.21	124.669	397.46
125.37	240.39	125.369	397.99
126.07	239.69	126.068	397.34
126.77	239.06	126.77	398.25
127.464	239.79	127.469	401.74
128.17	239.3	128.171	399.16
128.869	239.3	128.869	400.71
129.569	238.53	129.569	404.18
130.268	239.83	130.269	401.42
130.968	239.7	130.969	404.26
131.67	238.82	131.669	393.61
132.368	238.29	132.369	393.65
133.07	238.22	133.068	399.64
133.768	238.04	133.768	398.61
134.468	238.06	134.468	394.04
135.168	238.03	135.169	397.72
135.869	237.37	135.869	401.13
136.569	238	136.569	399.52
137.269	239.95	137.269	403.36
137.969	237.08	137.969	400.78
138.669	236.64	138.668	405.78
139.37	237.74	139.369	406.95
140.07	241.1	140.069	374.08
140.767	240.86	140.769	354.38
141.467	238.81	141.469	333.53
142.169	237.4	142.169	323.6
142.867	238.01	142.869	333.05
143.568	237.43	143.569	340.71
144.268	238.1	144.269	355.78
144.969	238.39	144.97	363.87
145.669	239.98	145.67	371.79
146.369	238.02	146.368	375.51
147.067	237.08	147.07	377.17
147.769	236.38	147.768	378.34
148.467	237.43	148.469	379.05
149.169	237.94	149.171	384.76
149.869	236.9	149.869	387.15
150.567	261.52	150.569	386.77
151.268	271.68	151.269	387.27
151.968	270.86	151.969	390.7
152.668	259.54	152.669	396.6
153.368	249.77	153.369	394.85
154.068	246.21	154.069	393.39
154.768	242.7	154.769	393.82
155.468	242.54	155.469	395.48
156.168	241.4	156.169	395.84
156.868	241.32	156.868	394.38
157.57	241.26	157.568	394.07
158.27	240.46	158.268	396.26
158.968	239.92	158.969	398.01
159.67	240.22	159.669	395.58
160.37	240.39	160.367	396.42
161.068	239.79	161.069	396.3
161.768	238.54	161.768	399.17
162.467	240.56	162.469	399.18
163.168	241.55	163.169	392.06
163.868	238.66	163.869	403.25
164.568	237.57	164.567	366.64
165.268	238.21	165.269	354.67
165.969	237.52	165.968	321.47
166.667	236.86	166.668	335.06
167.369	237.7	167.37	346.9
168.069	240.77	168.068	362.28
168.77	239.47	168.768	368.01
169.468	237.99	169.469	371.95
170.168	237.57	170.169	377.58
170.87	236.68	170.868	378.17
171.568	238.51	171.57	380.54
172.27	237.82	172.267	382.2
172.969	235.27	172.967	384.24
173.669	235.71	173.667	385.49
174.369	235.63	174.367	389.8
175.069	235.44	175.067	390.58
175.769	234.87	175.767	393.7
176.469	235.51	176.468	393.96
177.169	235.06	177.168	396.38
177.869	239.92	177.868	396.58
178.57	240.99	178.568	398.41
179.269	239.76	179.269	397.88
179.969	237.43	179.968	396.39
180.669	235.46	180.669	400.35
181.369	235.7	181.368	400.37
182.069	235.82	182.07	401.64
182.769	236.72	182.769	403.51
183.469	236.31	183.47	404.04
184.169	234.87	184.17	401.34
184.868	235.06	184.87	403.29
185.568	235.48	185.57	404.36
186.268	237.99	186.27	402.51
186.968	240.47	186.969	403.88
187.668	238.88	187.669	403.83
188.369	235.24	188.368	406.67
189.069	235.28	189.07	407.17
189.769	234.59	189.77	406.65
190.469	237.52	190.47	405.24
191.169	270.54	191.17	408.14
191.869	272.86	191.87	406.63
192.569	269.38	192.565	409.75
193.269	251.99	193.268	411.71
193.969	245.91	193.97	409.68
194.669	244.56	194.669	409.95
195.369	241.83	195.369	413.87
196.069	240.71	196.069	410.31
196.769	239.57	196.769	411.07
197.469	239.03	197.469	397.73
198.169	238.64	198.169	396.23
198.87	239.05	198.869	356.67
199.568	237.71	199.569	362.54
200.269	237.19	200.269	359.05
200.969	237.05	200.969	328.68
201.669	236.77	201.669	332.29
202.371	236.06	202.369	334.26
203.069	236.11	203.069	344.97
203.771	235.64	203.768	355.36
204.467	240.93	204.469	361.56
205.169	267.82	205.169	371
205.868	271.11	205.868	374.35
206.568	262.42	206.568	378.21
207.268	249.46	207.268	382.54
207.968	244.94	207.97	378.85
208.668	244.15	208.67	379.96
209.368	242.04	209.369	385.14
210.068	241.49	210.069	385.57
210.768	239.91	210.768	389.59
211.468	240.44	211.47	391.13
212.167	239.2	212.17	387.5
212.869	239.84	212.868	389.65
213.569	240.36	213.568	391.22
214.269	238.78	214.268	395.92
214.968	238.54	214.969	392.84
215.668	238.19	215.668	391.41
216.369	237.93	216.369	371.44
217.069	238.57	217.067	345.73
217.769	237.34	217.769	326.85
218.469	237.75	218.469	329.47
219.169	237.92	219.169	341.73
219.869	237.31	219.867	357.69
220.569	237.12	220.569	367.36
221.268	237.27	221.268	370.95
221.968	237.81	221.968	374.35
222.669	235.8	222.668	376.11
223.369	237.22	223.368	388.87
224.069	237.4	224.07	377.75
224.769	236.54	224.768	382.84
225.467	238.53	225.468	385.91
226.167	239.47	226.168	388.7
226.869	240.18	226.869	390.07
227.569	267.89	227.568	388.75
228.269	276.8	228.268	392.17
228.968	263.49	228.97	405.26
229.668	250.5	229.668	374.25
230.369	244.94	230.369	343.4
231.068	242.94	231.069	331.85
231.768	240.61	231.77	348.82
232.469	239.62	232.47	365.41
233.17	238.46	233.169	375.5
233.868	238.63	233.869	379.64
234.568	239.72	234.569	383.86
235.27	239.14	235.269	387.1
235.969	240.11	235.967	385.87
236.669	241.22	236.669	389.98
237.369	241.49	237.367	391.76
238.069	240.4	238.067	390.52
238.769	238.57	238.767	390.53
239.469	239.12	239.467	394.61
240.169	236.68	240.17	395.74
240.869	239.46	240.868	394.7
241.569	238.79	241.568	398.32
242.269	238.62	242.268	397.17
242.969	240.65	242.967	399.31
243.665	239.02	243.668	398.63
244.37	238.27	244.369	384.07
245.07	238.33	245.067	357.29
245.77	237.28	245.768	316.58
246.469	238.77	246.47	331.95
247.169	238.15	247.17	341.55
247.869	237.31	247.871	358.04
248.569	237.81	248.569	369.44
249.268	237.74	249.27	372.9
249.969	239.44	249.969	378.21
250.669	239.44	250.669	380.83
251.369	240.49	251.368	386.83
252.068	240.02	252.066	385.56
252.768	239.2	252.769	387.19
253.469	238.47	253.471	386.72
254.169	237.8	254.166	392.04
254.869	237.94	254.87	395.03
255.564	238.74	255.57	396.31
256.268	238.45	256.268	395.34
256.969	238.66	256.97	397.44
257.671	255.03	257.666	400.55
258.369	272.97	258.368	401.81
259.069	269.16	259.066	403.77
259.769	254.6	259.769	401.47
260.47	246.76	260.469	391.61
261.168	242.06	261.165	371.09
261.87	240.32	261.869	349.05
262.57	240.36	262.569	321.89
263.27	240.01	263.27	335.18
263.969	238.67	263.97	353.29
264.669	239.38	264.669	367.74
265.37	237.84	265.369	370.93
266.068	238.27	266.065	382.04
266.77	239.73	266.769	385.51
267.468	238.61	267.469	385.33
268.17	238.14	268.169	390.25
268.868	239.5	268.87	390.2
269.568	239.42	269.57	392.32
270.267	240.04	270.269	394.91
270.967	240.57	270.97	395.68
271.668	238.03	271.67	399.43
272.368	237.33	272.37	399.05
273.068	237.06	273.07	399.06
273.768	237.77	273.77	400.24
274.469	237.25	274.47	404.09
275.167	237.02	275.169	401.29
275.869	237.67	275.87	404.45
276.569	237.49	276.569	404.54
277.268	236.87	277.271	407.39
277.968	236.37	277.969	408.74
278.668	238.07	278.669	410.77
279.37	238.15	279.368	409.26
280.068	237.82	280.07	410.33
280.769	237.26	280.769	401.98
281.469	237.35	281.469	393.89
282.168	237.13	282.169	409.81
282.87	237.25	282.869	411.02
283.57	238.73	283.569	412.96
284.27	240.46	284.269	413.91
284.968	239.56	284.969	410.47
285.67	238.87	285.67	410.58
286.37	238.13	286.368	408.28
287.068	237.36	287.069	410.45
287.769	237.32	287.769	409.2
288.467	236.65	288.469	411.55
289.169	235.68	289.169	409.79
289.867	236.43	289.869	401.73
290.568	235.63	290.569	365.79
291.269	235.64	291.268	348.25
291.967	236	291.968	322.39
292.67	236	292.668	329.48
293.369	236.41	293.37	339.79
294.068	235.36	294.068	357.7
294.769	235.79	294.768	370.23
295.468	235.28	295.469	376.4
296.17	235.4	296.169	381.71
296.871	236.08	296.87	384.63
297.569	248.93	297.571	390.8
298.27	274.84	298.269	393.08
298.968	275.46	298.969	397.34
299.67	273.32	299.667	395.14

## Sheet: Figure 5-supplement 1B-CBX
CBX																								H2O
Before												After												Before													After
Time [s]	#1 (TD)	#2 (TD)	#3 (TD)	Time [s]	#1 (TD)	#2 (TD)	#3 (TD)	Time [s]	#1 (TD)	#2 (TD)	#3 (TD)	Time [s]	#1 (TD)	#2 (TD)	#3 (TD)	Time [s]	#1 (TD)	#2 (TD)	#3 (TD)	Time [s]	#1 (TD)	#2 (TD)	#3 (TD)	Time [s]	#1 (TD)	#2 (TD)	#3 (TD)	#4 (TD)	Time [s]	#1 (TD)	#2 (TD)	#3 (TD)	Time [s]	#1 (TD)	#2 (TD)	#3 (TD)	Time [s]	#1 (TD)	#2 (TD)	#3 (TD)	#4 (TD)	Time [s]	#1 (TD)	#2 (TD)	#3 (TD)	Time [s]	#1 (TD)	#2 (TD)	#3 (TD)
0.064	243.02	213.26	239.49	0.066	258.43	226.23	251.82	0.066	220.93	270.51	287.98	0.065	346.59	349.49	351.18	0.066	416.88	337.68	395.41	0.064	367.92	420.83	420.73	0.065	232.78	219.09	269.37	298.5	0.065	359.85	280.79	291.89	0.065	354.74	334.27	293.68	0.064	213.97	203.34	258.14	279.97	0.065	321.34	239.31	230.98	0.064	311.82	268.06	253.85
0.768	242.87	213.4	237.83	0.768	254.41	226.51	252.66	0.768	220.52	270.15	287.78	0.769	349.08	349.46	350.97	0.77	416.9	337.44	395.1	0.768	367.79	418.59	422.42	0.767	231.01	218.75	268.65	294.17	0.769	359.83	282.51	292.42	0.769	354.39	335.01	294.33	0.767	214.05	203.49	257.87	280.2	0.769	320.5	239.79	230.87	0.77	312.41	267.49	240.42
1.463	243.67	213.09	234.4	1.466	247.31	226.06	252.26	1.466	221.04	268.79	288.35	1.466	347.75	350.15	350.91	1.466	416.81	338.67	394.87	1.464	368.22	416.06	422.12	1.464	232.2	219	268.55	289.39	1.463	359.82	288.7	291.74	1.465	354.15	337.3	294.61	1.463	214.38	210.12	257.6	280.93	1.464	321.15	239.77	230.65	1.464	312.16	268.17	239.44
2.163	245.56	216.09	235.26	2.168	245.17	226.58	252.58	2.167	220.76	268.71	288.07	2.169	348.07	349.76	351.03	2.165	416.94	339.3	394.69	2.168	368.37	415.56	423.01	2.168	231.93	219.13	268.22	284.85	2.169	359.85	286.68	292.28	2.169	354.84	341.17	294.18	2.168	213.57	213.37	258.21	281.06	2.164	320.77	239.57	230.43	2.169	312.38	267.68	241.63
2.868	245.77	217.86	234.74	2.87	244.72	226.24	252.59	2.867	220.57	268.07	288	2.864	347.65	349.84	351.56	2.869	417.14	339.85	394.98	2.868	368.17	414.86	423.85	2.867	231.32	219.57	268.57	283.94	2.867	359.13	281.57	291.73	2.864	353.61	340.15	294.16	2.866	213.38	208.78	258.07	280.17	2.868	320.58	239.52	230.3	2.867	313.05	272.73	241.33
3.568	242.87	215.51	233.4	3.568	244.89	227.04	252.76	3.567	220.51	267.69	288.19	3.563	348.04	350.27	351.7	3.57	416.85	341.09	394.73	3.568	368.22	413.55	423.39	3.568	231.21	219.88	268.34	284.21	3.567	360.12	279.83	292.53	3.568	353.64	339.24	294.38	3.569	214.91	205.24	257.98	280.66	3.568	320.96	240.3	230.98	3.569	313.33	276.97	242.26
4.268	238.59	214.78	232.25	4.264	245.51	237.18	254.53	4.269	220.35	268.26	288.87	4.269	348.19	350.47	352.31	4.269	417.63	341.43	394.29	4.268	369.95	418.16	422.46	4.269	231.31	220.34	268.74	283.47	4.265	359.52	278.37	292.13	4.268	353.45	337.5	295.17	4.267	213.76	204.01	257.86	280	4.268	321.14	240.98	231.14	4.267	313.64	274.73	240.94
4.968	236.59	214.87	232.82	4.965	246.36	245.8	257.12	4.968	220.27	267.65	288.28	4.969	348.7	349.69	352.12	4.968	417.95	341.77	398.3	4.968	370.39	419.23	422.67	4.969	231.59	228	268.41	284.51	4.967	359.87	279.5	292.22	4.968	353.87	335.27	296.5	4.969	214.02	204.16	258.26	280.89	4.968	321.16	240.35	230.8	4.965	313.34	271.86	242.01
5.668	238.18	215.2	233.61	5.671	247.08	244.2	256.15	5.668	220.42	266.77	287.84	5.669	348.45	349.8	352.78	5.668	417.86	342.84	408.42	5.667	369.8	419.81	423	5.669	231.61	227.48	268.39	283.36	5.667	359.74	279.83	291.86	5.668	353.84	333.93	295.87	5.667	213.85	203.96	258.2	279.78	5.668	320.78	240.46	230.68	5.667	313.52	269.16	243.58
6.364	239.68	215.27	232.9	6.369	246.86	239.74	253.2	6.368	220.64	266.24	288.04	6.368	349.01	350.26	353.16	6.37	419.16	342.52	402.73	6.368	369.6	416.56	423.6	6.369	231.34	223.37	268.47	283.71	6.367	359.67	279.98	291.76	6.37	362.54	333.39	295.64	6.367	214.53	203.9	257.78	280.55	6.368	320.72	240.73	230.91	6.367	317.09	269.12	244.55
7.068	240.73	215.4	232.45	7.069	247.23	235.13	248.97	7.068	222.49	266.96	287.67	7.064	349.28	350.79	353.4	7.069	419.93	358.91	400	7.068	369.47	416.54	423.3	7.069	231.68	215.5	268.47	283.43	7.069	370.23	280.46	291.71	7.07	367.78	332.59	295.44	7.067	213.88	203.81	257.81	280.14	7.069	321.02	241.14	231.05	7.067	316.66	266.54	245.98
7.768	241.25	215.46	231.94	7.77	247.28	230.56	248.97	7.768	224.76	267.84	287.7	7.768	348.9	349.74	360.93	7.769	419.81	351.27	399.66	7.768	369.19	415.57	423.57	7.767	231.83	213.93	268.59	283	7.768	372.9	280.08	292.58	7.77	359.2	333.85	295	7.768	214.17	203.31	258.58	280.27	7.765	320.31	240.98	231.67	7.768	314.26	266.88	245.86
8.467	240.93	215.01	231.91	8.466	247.41	228.85	249.15	8.468	224.85	267.87	288.13	8.468	348.62	350.37	356.72	8.468	419.36	345.51	398.63	8.468	369.24	414.1	422.53	8.469	231.66	215.22	268.19	283.59	8.468	372.47	280.36	292.13	8.465	355.02	332.03	294.83	8.465	214.45	203.3	262.9	279.6	8.468	319.6	240.42	232.54	8.47	313.85	267.43	245.92
9.167	241.49	214.95	231.9	9.169	247.62	228.36	249.75	9.168	223.67	266.81	287.85	9.168	349.24	350.74	351.44	9.169	419.18	345.81	401.03	9.168	369.29	413.92	423.12	9.167	231.67	216.35	269.01	284.02	9.168	362.85	280.14	292.22	9.169	351.32	332.44	295.01	9.169	214.24	203.35	263.78	279.9	9.168	320.27	248.65	232.3	9.17	311.35	266.65	246.51
9.866	241.57	215.68	232.3	9.869	247.73	227.7	249.75	9.868	222.01	267.23	287.4	9.87	349.91	351.4	351.06	9.864	418.83	336.19	398.86	9.868	369.08	419.3	423.32	9.868	231.96	216.51	272.07	283.18	9.868	358.32	280.6	292.24	9.869	349.71	332.51	295.21	9.869	214.86	203.29	260.79	280.74	9.864	320.41	246.17	232.04	9.868	311.53	269.44	247.09
10.566	241.44	215.04	232.63	10.57	248.17	227.5	250.06	10.568	220.83	267.83	287.76	10.568	349.73	353.99	355.91	10.569	418.55	339.78	397.77	10.565	369.37	415.43	422.51	10.568	231.56	217.1	279.7	283.6	10.568	353.41	280.86	292.15	10.569	351.09	333.07	294.78	10.567	214.52	203.46	261.15	280.3	10.568	320.59	240.86	232.3	10.57	311.34	270.4	247.33
11.264	242.25	215.28	232.14	11.27	248.23	227.92	250.52	11.268	220.36	267.24	287.74	11.266	350.31	365.17	353.22	11.269	418.78	340.33	397.22	11.267	369.14	418.31	421.83	11.268	232.03	217.19	278.69	283.45	11.264	353.8	280.73	291.84	11.27	351.46	332.69	295.07	11.267	215.09	203.8	259.22	280.26	11.268	320.57	237.83	232.31	11.268	311.25	268.41	247.71
11.967	241.96	215.92	232.33	11.968	248.71	227.79	250.77	11.968	219.46	266.73	288.34	11.97	350.03	360.56	353.33	11.969	418.63	342.55	395	11.969	369.13	415.18	423.08	11.968	232.24	216.71	276.11	282.7	11.968	355.27	281.02	292.13	11.968	352.46	332.7	295.27	11.967	214.36	203.7	258.76	288.52	11.968	320.57	239.79	232.57	11.968	311.7	266.93	248.68
12.667	242.46	216.2	231.75	12.668	248.89	228.14	251.4	12.668	219.56	267.15	287.55	12.669	350.25	350.5	352.97	12.665	418.31	345.22	396.07	12.669	369.03	413.79	424.25	12.669	231.89	217.35	273.71	283.76	12.664	355.4	280.55	292.13	12.671	353.54	332.05	295.59	12.667	215	204.38	258.55	292.27	12.668	320.45	240.48	232.34	12.668	312.1	267.83	249.5
13.364	242.7	216.43	231.06	13.368	249.82	227.32	251.18	13.368	219.33	267.46	288.3	13.369	351.86	349.73	352.62	13.369	418.89	344.44	395.66	13.369	369.06	412.24	424.44	13.368	232.76	217.47	271	283.1	13.368	355.8	280.85	292.64	13.369	352.78	332.94	295.57	13.367	215.38	204.36	258.61	285.5	13.368	320.45	240.2	232.76	13.368	312.79	268.23	249.22
14.064	243.98	215.62	231.45	14.064	248.72	227.04	252.11	14.068	219.99	273.15	287.86	14.068	357.87	350.72	361.09	14.066	418.24	344.24	394.14	14.069	368.66	412.18	423.98	14.067	238.56	217.6	271.05	283.17	14.068	356.08	281.42	292.56	14.07	352.82	332.38	295.67	14.068	215.18	204.15	259.13	283.9	14.068	320.78	241.08	232.63	14.069	313.18	267.45	249.76
14.769	243.97	216.23	231.86	14.767	248.36	226.66	251.41	14.768	220.32	274.13	287.81	14.769	359	351.01	353.79	14.768	417.6	344.53	394.86	14.768	368.53	411.1	424.31	14.769	239	218.12	271.21	283.28	14.768	356.19	281.53	292.7	14.766	351.86	332.44	295.54	14.767	215.13	204.21	259.07	283.67	14.767	325.03	240.77	232.41	14.77	313.78	267.35	249.69
15.466	246.73	220.85	231.96	15.467	248.49	227.44	251.62	15.467	220.1	269.56	288.14	15.469	351.4	350.77	352.13	15.469	418.83	343.5	394.69	15.468	375.74	413.35	423.99	15.469	232.57	218.7	270.69	283.18	15.468	356.86	280.72	292.02	15.468	352.15	332.43	294.96	15.467	214.95	204.16	259	283.8	15.469	328.52	240.92	232.13	15.469	312.83	267	250.35
16.169	250.86	229.54	232.34	16.167	249.23	226.96	255.06	16.169	220.68	267.64	288.08	16.171	350.72	354.65	350.88	16.169	417.99	342.75	394.4	16.169	364.15	418.38	423.94	16.168	232.36	220.78	270.75	283.36	16.169	357.11	280.82	293.14	16.168	352.28	333.13	295.23	16.167	215.03	204.76	258.76	283.6	16.167	323.19	240.72	232.48	16.169	312.9	268.16	250.38
16.866	245.7	227.05	237.19	16.868	249.18	227.13	256.42	16.867	220.79	266.73	288.2	16.865	350.81	352.55	351.53	16.869	419.58	344.01	394.91	16.867	360.71	421.98	423.95	16.867	233.82	228.56	270.57	287.99	16.867	356.95	280.49	292.02	16.87	352.43	332.61	295.09	16.869	215.52	210.09	258.63	283.34	16.869	322	240.26	232.46	16.867	312.45	267.45	250.51
17.569	243.97	219.33	243.5	17.568	249.19	226.73	251.15	17.569	220.57	266.71	288.87	17.569	352.06	352.91	352.18	17.569	418.08	348.77	394.96	17.567	360.98	420.01	423.35	17.567	234.13	227.38	271.29	296.6	17.568	357.4	280.84	301.24	17.568	352.04	333.57	295.56	17.567	215.32	213.65	259.09	283.17	17.568	317.04	240.07	232.78	17.569	312.55	268.29	250.08
18.268	242.43	217.67	242.95	18.264	249.65	226.7	249.75	18.267	220.5	267.24	288.17	18.268	352.02	352.7	353.18	18.269	419.12	351.69	395.19	18.267	363.58	415.43	422.48	18.268	233.63	219.13	270.7	292.49	18.269	357.53	280.7	302.87	18.269	352.68	333.31	293.74	18.268	215.13	211.33	259.47	283.16	18.268	316.09	239.84	231.98	18.267	313.3	274.86	257.31
18.969	239.94	217.79	239.83	18.964	249.48	226.5	249.43	18.968	220.6	267.45	288.59	18.968	352.77	352.74	362.65	18.97	418.38	342.88	394.56	18.969	363.84	413.39	431.48	18.969	233.84	216.06	271.18	288.64	18.967	358.01	281.51	296.26	18.97	352.57	333.05	303.28	18.968	215.96	206.63	258.97	283.43	18.969	318	239.94	232.33	18.969	313.55	274.84	247.37
19.667	239.14	218.07	241	19.667	253.78	226.65	249.91	19.667	221.04	266.77	288.55	19.669	352.75	353.45	363.54	19.668	419.06	338.58	395.64	19.67	364.6	412.7	429.14	19.669	234.11	216.66	270.97	286.51	19.669	358.02	281.69	291.73	19.669	353.12	333.81	305.87	19.667	223.68	203.77	258.87	283.27	19.669	318.9	239.9	232.39	19.669	313.13	272.41	242.61
20.369	240.66	217.76	241.11	20.367	259.86	226.17	250.79	20.368	220.64	267.53	288.47	20.369	353.23	352.43	355.54	20.369	419.28	341.09	395.74	20.366	365.07	410.54	423.27	20.368	234.05	217.32	270.75	285.72	20.367	358.2	282.28	293.31	20.367	353.43	333.52	294.47	20.366	219.31	204.38	263.24	282.74	20.369	319.01	240.22	232.11	20.369	313.6	268.66	243.87
21.067	242.54	217.14	239.73	21.07	256.79	226.62	250.83	21.068	220.37	271.16	287.67	21.069	353.07	352.13	353.66	21.065	419.4	341.77	395.34	21.067	366.22	411.62	423.3	21.068	233.83	217.98	270.46	285.43	21.069	358.09	282.04	292.24	21.069	352.31	333.18	289.65	21.066	213.18	203.9	264.22	282.82	21.069	318.45	240.48	232.86	21.068	312.38	268.74	242.37
21.767	242.55	216.58	238.03	21.768	248.91	227.14	250.44	21.769	220.81	269.96	293.57	21.769	354.06	352.25	353.02	21.769	419.41	341.46	395.51	21.77	366.46	418.49	421.12	21.768	234.15	218.77	272.24	285.01	21.769	358.5	287.3	292.53	21.769	353.15	333.57	286.82	21.766	214.15	204.53	262.08	282.74	21.769	319.09	240.83	232.88	21.768	313.5	268.09	243.92
22.469	243.6	216.88	236.64	22.47	245.51	226.96	251.25	22.469	220.59	267.79	293.88	22.469	353.99	352.46	353.71	22.469	419.39	342.49	395.14	22.467	366.48	420.56	420.3	22.468	233.96	219.02	281.18	285.1	22.468	357.92	286.63	292.73	22.469	353.92	337.33	286.17	22.466	214.33	204.18	261.17	282.92	22.469	319.14	241.17	232.75	22.468	313.86	269.3	243.58
23.165	243.01	217	236.08	23.17	245.04	227.13	251.47	23.169	220.91	267.51	290.63	23.169	354.45	351.9	354.56	23.171	419.56	341.91	395.32	23.167	366.9	420.18	419.77	23.168	234.13	225.94	283.6	283.83	23.17	357.81	281.38	292.45	23.168	353.98	340.53	286.13	23.166	213.87	204.12	261.06	283.23	23.169	319.73	241.06	233.6	23.168	312.21	268.89	244.35
23.867	243.99	217.32	236.05	23.868	245.01	241.89	251.57	23.867	220.53	267.16	285.36	23.865	354.66	363.83	353.86	23.869	419.89	342.61	395.51	23.867	367.51	416.94	419.61	23.868	233.81	222.66	279.04	285.11	23.869	359.29	279.93	292.32	23.868	353.31	339.11	286.44	23.866	214.1	204.22	258.88	283.81	23.868	319.61	241.1	232.77	23.868	313.05	268.82	245.49
24.567	245.97	217.47	236.24	24.568	244.39	245.67	251.59	24.568	220.82	267.3	284.19	24.568	354.84	368.75	355.27	24.568	419.88	343.33	394.66	24.567	368.05	416.65	420.7	24.57	233.99	218.16	278.25	284.95	24.569	358.64	278.47	291.59	24.568	353.88	338.82	288.21	24.568	214.8	204.23	259.58	283.93	24.568	319.66	241.07	232.66	24.567	314.15	267.97	246.48
25.268	244.93	223.95	235.43	25.269	245.42	242.12	253.75	25.268	220.5	267.24	283.46	25.269	354.97	358.67	354.78	25.272	420.42	342.47	394.32	25.267	368.21	413.93	421.48	25.269	234.01	218.89	277.22	285.26	25.269	358.22	277.68	292.1	25.268	353.43	338.65	288.86	25.266	214.99	204.74	259.03	283.6	25.267	319.75	241.4	232.9	25.267	313.01	267.66	247.56
25.969	248.12	224.9	235.79	25.968	246.35	240.98	256.26	25.967	220.53	266.86	283.55	25.969	355.17	353.14	361.71	25.969	419.6	343.05	394.27	25.969	368.9	412.29	422	25.97	234.06	218.82	273.09	284.53	25.969	358.41	280.2	291.98	25.968	353.28	335.79	288.56	25.968	215.1	204.57	259.13	283.75	25.967	319.42	241.05	233.53	25.969	312.93	267.89	247.63
26.669	248.47	217.97	235.51	26.669	246.52	235.45	254.71	26.667	220.38	269.12	282.28	26.667	355.27	351.53	359.88	26.667	420.34	342.4	394.8	26.667	368.79	411.27	421.24	26.669	234.22	219.4	272.54	288.87	26.668	358.42	280.08	291.61	26.668	354.15	335.1	289.05	26.668	216.55	204.72	259.31	290.25	26.667	319.48	240.52	233.06	26.668	312.94	268.12	247.63
27.369	245.69	218.14	235.77	27.368	246.63	231.7	249.39	27.367	220.65	273.07	282.26	27.37	355.39	352.91	361.71	27.367	420.31	342.19	394.34	27.367	369.25	410.39	427.46	27.371	234.31	219.59	273.17	297.51	27.368	359.11	280	291.76	27.368	353.91	332.91	290.32	27.368	222.82	205.03	259.73	289.04	27.367	319.37	240.6	233.15	27.371	313.79	268.36	248.4
28.069	245.42	217.39	235.8	28.068	246.98	230.18	250.39	28.067	222.46	271.23	282.84	28.067	355.9	353.61	360.95	28.067	418.91	344.73	395.18	28.068	368.65	415.3	422.8	28.069	234.16	219.65	271.98	293.9	28.069	372.44	279.9	291.38	28.068	354.32	332.99	290.66	28.068	217.14	204.68	259.59	285.61	28.067	320.34	240.28	233.34	28.069	313.49	267.97	248.55
28.767	245.84	217.82	235.99	28.768	247.37	229.6	249.85	28.767	223.43	268.02	283.17	28.771	356.09	353.76	358.08	28.767	420.67	344.06	394.78	28.768	368.57	416.96	421.31	28.769	234.56	219.99	272.4	295.5	28.769	370.83	280.66	291.54	28.77	353.46	332.2	292.13	28.77	216.61	205.27	259.09	284.73	28.767	319.94	240.73	232.94	28.769	313.3	267.79	250.21
29.467	244.72	217.62	235.9	29.468	247.77	228.81	250.41	29.468	224.2	267.39	284.04	29.469	356.5	352.6	355.4	29.469	420.33	345.38	395.03	29.468	368.33	421.38	419.22	29.467	234.76	219.8	272.43	293.2	29.469	368.33	281.13	291.28	29.468	353.33	332.38	291.94	29.468	216.08	205.53	259.71	285.37	29.469	320.36	240.89	241.06	29.469	318.88	267.59	253.81
30.167	246.14	217.79	236.02	30.168	247.72	229.04	250.45	30.167	223.07	267.09	284.2	30.17	356.36	353.54	353.54	30.167	421.69	344.76	394.95	30.167	368.97	419.28	419.81	30.169	234.52	220.38	272.17	288.12	30.169	360.21	281.04	291.15	30.169	354.04	332.85	292.08	30.167	216.04	205.26	259.29	285.36	30.168	322.14	240.49	244.56	30.171	317.02	268.01	243.79
30.867	243.68	218	236.02	30.868	247.91	228.64	250.56	30.868	219.68	266.58	284.56	30.869	356.27	353.75	353.83	30.868	420.83	344.49	396.38	30.867	368.9	415.97	421.15	30.868	235.68	220.79	272.84	287.68	30.869	355.93	281.74	291.7	30.869	353.37	332.75	292.91	30.869	216.43	205.26	259.3	284.76	30.869	326.55	240.91	235.49	30.869	316.31	269.17	242.77
31.568	243.62	218.3	236.24	31.569	248.51	228.33	250.54	31.568	218.63	267.21	285.26	31.569	357.58	352.49	354.36	31.569	421.3	345.38	394.15	31.569	368.42	416.28	421.11	31.568	243	221.67	272.19	286.23	31.569	355.2	281.15	291.49	31.569	353.87	331.95	292.34	31.567	216.12	205.34	258.87	284.46	31.569	325.8	240.82	232.61	31.57	313.44	267.11	243.65
32.268	244.37	218.02	236.61	32.268	248.24	227.97	250.66	32.269	218.92	266.7	285.8	32.271	357.23	352.33	355.54	32.27	420.67	358.39	394.73	32.268	368.37	416.8	421.09	32.268	241.67	220.72	272.55	286.99	32.268	355.88	282.35	291.77	32.269	353.95	332.51	292.92	32.269	215.92	205.5	259.6	284.98	32.269	315.92	240.13	230.36	32.268	310	267.68	243.88
32.968	245.04	218.89	235.83	32.969	248.44	228.14	251.33	32.967	219.08	266.9	286.3	32.969	357.42	352.3	355.69	32.968	419.74	345.91	394.79	32.969	368.4	414.51	420.77	32.968	234.11	221.31	272.67	286.65	32.968	355.96	282.45	290.88	32.969	353.73	332.19	292.88	32.969	216.57	205.55	259.67	283.79	32.969	315.59	240.57	230.85	32.968	311.64	267.33	243.58
33.668	245.6	219.73	236.48	33.669	248.08	227.71	251.19	33.667	219.1	266.33	286.16	33.669	357.96	352.3	356.04	33.669	419.87	347.32	394.78	33.669	368.41	414.6	421.74	33.668	234.25	221.73	273.02	287.43	33.668	356.44	282.2	291.36	33.668	353.93	332.63	293.61	33.667	216.91	205.56	260.99	290.41	33.669	316.99	240.57	231.4	33.67	312.08	267.65	243.84
34.368	245.87	224.26	236.65	34.369	248.49	226.86	252.3	34.367	218.66	266.66	286.43	34.368	358.07	352	355.99	34.367	420.06	345.17	395.55	34.369	367.96	415.15	422.08	34.368	236.66	222.19	273.04	287.55	34.369	357.26	282.41	291.56	34.368	353.25	332.58	296.83	34.368	216.77	206.42	265.16	286.25	34.365	318.22	240.43	231.26	34.37	311.38	266.99	245.46
35.068	246.02	222.35	236.3	35.068	248.82	226.82	252.37	35.067	218.91	266.72	286.09	35.07	357.7	352.64	357.44	35.069	420.47	336.21	394.71	35.069	368.33	416.19	421.94	35.07	236.27	222.76	272.74	287.38	35.068	357.2	281	291.47	35.069	353.34	333.4	297.97	35.069	216.98	206.51	266.43	287.09	35.068	318.42	241.05	230.84	35.07	311.24	267.04	246.14
35.768	246.73	220.54	236.07	35.768	248.6	227.07	252.38	35.767	219.14	266.63	286.64	35.771	363.96	352.88	356.72	35.769	420.86	337.86	394.84	35.769	368.85	419.05	422.27	35.769	235.37	223.52	273.73	287.8	35.77	358.22	281.81	292.25	35.769	353.7	332.59	292.96	35.769	216.9	206.87	264.25	286.94	35.769	319.14	240.69	231.29	35.768	310.87	269.57	247.43
36.467	247.15	219.85	236.23	36.467	249.05	226.78	252.97	36.469	218.86	266.85	286.88	36.47	364.63	352.69	356.06	36.468	420.77	339.62	394.99	36.469	367.96	423.73	422.34	36.469	235.63	230.3	272.9	286.88	36.47	358	282.44	301.38	36.469	352.56	332.84	288.21	36.47	217.23	206.61	262.63	286.46	36.469	319.58	240.58	231.89	36.467	311.44	268.56	247.85
37.168	247.17	219.97	236.51	37.168	248.57	235.43	252.83	37.168	219.19	266.91	286.39	37.17	362.07	352.79	356.65	37.169	421.3	340.74	394.95	37.169	368.71	421.77	422.88	37.168	236.02	229.85	274.69	286.55	37.169	358.43	282.73	301.31	37.169	367.75	333.26	287.49	37.168	217.11	207.21	260.72	286.82	37.169	319.4	240.32	231.29	37.168	311.79	275.1	247.69
37.868	247.69	220.1	246.92	37.869	255.51	246.3	252.8	37.869	219.38	266.04	286.2	37.868	356.79	355.82	369.83	37.869	430.71	341.56	395.75	37.869	368.02	417.5	422.09	37.868	236.08	224.6	282.8	287.13	37.869	358.68	282.22	291.8	37.869	360.1	333.21	286.71	37.87	217.21	207.3	260.76	286.32	37.869	319.2	240.71	232.07	37.868	311.57	278.19	248.28
38.568	247.65	220.6	248.84	38.567	260.64	243.5	252.86	38.567	219.63	269.34	286.97	38.568	353.08	352.44	369.79	38.569	431.71	342.27	395.89	38.568	368.47	415.23	421.97	38.568	236.26	218.7	283.59	287	38.568	358.52	282.53	291.62	38.567	350.49	333.66	287.17	38.568	217.4	207.07	260.41	286.86	38.565	319.86	240.66	232.16	38.568	312.3	275.99	248.55
39.268	247.45	220.79	249.19	39.267	257.23	240.46	256.15	39.267	219.61	272.16	286.94	39.269	354.05	351.19	360.05	39.269	420.21	348.86	395.33	39.268	368.14	414.99	420.99	39.268	236.63	218.85	279.53	287.16	39.269	364.57	282.67	291.75	39.269	350.69	333.31	287.46	39.269	217.79	207.21	260.88	286.99	39.269	320.18	240.29	231.65	39.267	313.1	271.61	249.02
39.967	248.06	220.96	247.96	39.969	251.7	235.53	256.2	39.97	220.04	271.66	287.21	39.968	354.76	352.36	355.68	39.969	416.47	345.53	395.59	39.968	368.58	414.58	421.43	39.967	236.37	219.83	276.37	287.74	39.968	373.95	282.35	291.3	39.969	348.86	333.29	288.16	39.969	218.08	207.45	260.24	286.84	39.968	319.82	240.5	231.75	39.967	313.3	269.79	248.7
40.667	248.72	220.76	246.53	40.669	246.91	231.58	253.01	40.67	219.56	268.1	286.71	40.669	355.92	352.74	362	40.669	412.43	338.45	395.59	40.668	368.41	422.83	421.44	40.669	236.49	220.87	275.3	287.65	40.67	372.06	281.99	292.03	40.667	348.68	333.03	289.22	40.668	218.42	207.68	260.32	287.3	40.67	319.8	240.56	231.96	40.67	312.78	268.61	248.5
41.368	249.4	220.88	243.36	41.367	245.16	230.38	250.85	41.369	220.08	266.93	286.92	41.369	356.51	352.75	359.14	41.369	411.79	340.99	395.45	41.368	367.84	420.71	420.82	41.367	236.21	221.53	274.65	287.96	41.368	362.82	283.31	291.92	41.367	349.38	333.42	288.91	41.368	217.97	207.62	261.02	286.99	41.368	319.97	240.77	231.96	41.368	312.42	268.84	248.32
42.068	249.05	220.86	242.61	42.068	244.96	229.58	250.9	42.068	220.35	266.49	286.54	42.069	356.92	353.39	361.15	42.07	411.17	340.54	395.54	42.069	376.09	420.51	422.14	42.069	236.27	222.14	274.34	287.93	42.07	358.34	283.23	292	42.069	349.45	332.95	290.01	42.067	218.51	206.8	261.29	288.66	42.07	319.97	240.49	232.7	42.069	313.35	268.91	248.84
42.768	249.94	220.67	241.45	42.768	244.73	229.37	250.57	42.769	219.94	266.02	286.05	42.769	357.6	353.03	358.11	42.769	412.37	342.96	395.54	42.769	363.8	418.38	420.98	42.768	236.61	222.21	274.74	288.46	42.768	356.74	282.76	292.05	42.768	350.23	334.02	289.69	42.769	218.47	209.29	261.25	287.97	42.77	320.06	241.32	232.38	42.769	314.3	268.74	248.59
43.468	249.26	221.54	241.31	43.469	245.16	229.69	251.23	43.47	220.08	266.16	286.23	43.469	358.59	355.12	356.22	43.469	412.46	342.19	396.39	43.468	359.7	415.36	421.26	43.47	240	222.42	274.29	287.57	43.47	357.09	282.9	291.46	43.47	350.78	333.45	290.12	43.467	219.12	216.65	261.14	287.98	43.47	319.71	248.62	232.38	43.469	314.25	268.27	248.39
44.168	252.98	221.4	241.01	44.169	246.11	229.09	250.61	44.17	220.12	265.83	286.4	44.169	358.76	355.07	356.92	44.169	412.78	342.64	397.09	44.17	360.84	415.42	430.67	44.168	243.97	222.44	274.54	288.83	44.17	357.87	282.99	291.55	44.168	351.84	338.85	290.81	44.169	218.75	213.84	261.16	287.33	44.17	319.12	246.52	232.77	44.169	314.26	268	249.48
44.868	254.01	221.8	240.86	44.87	246.56	228.53	251.11	44.868	220.1	266.01	286.47	44.869	359.01	355.81	357.2	44.869	415.24	343.71	396.79	44.868	362.72	416.2	429.67	44.87	241.26	222.39	274.96	288.29	44.87	357.89	282.87	291.82	44.868	351.44	341.41	291.92	44.867	218.96	209.75	261.38	287.1	44.864	319.38	240.17	232.71	44.869	313.52	267.5	249.77
45.568	250.32	221.87	240.84	45.568	246.87	229.03	251.39	45.568	219.95	266.24	286.12	45.569	359.4	356.21	356.96	45.569	414.12	344.53	395.21	45.568	364.04	415.86	422.12	45.569	236.11	222.85	274.72	287.78	45.567	358.43	284.24	292.16	45.567	351.34	339.31	293.82	45.567	219.01	206.87	265.03	288.05	45.569	319.47	240.24	233.32	45.569	313.82	267.23	251.84
46.268	248.78	222.5	241.59	46.27	248.3	228.89	251.39	46.268	220.21	265.97	287.69	46.268	359.66	355.85	358.13	46.267	414.27	344.93	396	46.269	365.22	417.35	420.84	46.269	238.58	229.08	275.28	288.4	46.269	358.09	283.25	292.56	46.268	351.41	337.42	295.81	46.268	219.37	206.3	267.85	287.4	46.268	318.8	236.85	233.4	46.269	314.4	267.93	256.88
46.967	248.13	223.9	241.12	46.969	248.23	228.18	251.61	46.968	219.96	266.2	287.84	46.969	360.44	356.73	357.53	46.968	413.41	344.25	396.19	46.967	365.72	416.86	420.36	46.968	239.27	230.92	274.7	287.89	46.967	358.38	283.25	292.42	46.969	351.66	335.97	291.46	46.968	219.83	207.24	265.78	287.43	46.968	319.42	239.36	233.03	46.965	314.2	267.14	245.64
47.668	247.99	231.13	242.13	47.668	248.63	228.36	251.69	47.668	221.49	266.11	290.12	47.669	360.37	360.97	358.77	47.667	414.41	345.3	395.69	47.667	365.96	418.26	420.71	47.668	238.72	226.27	274.62	287.9	47.667	358.33	283.27	292.64	47.667	351.29	333.48	289.18	47.668	219.7	207.88	265.4	287.82	47.67	319.54	239.79	233.28	47.663	314.82	267.92	241.83
48.368	246.03	234.92	241.71	48.369	248.5	227.86	252.8	48.367	223.63	265.94	294.01	48.369	360.51	367.03	358.92	48.367	414.93	344.67	395.61	48.369	366.51	420.55	420.27	48.368	238.72	221.5	275.08	288.48	48.367	358.81	283.62	292.24	48.369	351.3	333.38	286.65	48.368	220.19	207.97	263.83	288.29	48.37	319.99	240.45	233.21	48.368	314.3	267.52	243.4
49.068	246.81	227.8	242.08	49.068	248.62	227.93	253.99	49.069	222.93	266.03	285.96	49.069	360.65	362.55	359.61	49.069	416.11	361.3	396.05	49.069	366.69	419.29	421.31	49.068	238.6	222.07	275.35	288.51	49.067	358.77	282.61	292.67	49.069	351.7	332.53	285.83	49.068	220.11	207.97	262.43	287.98	49.07	319.64	239.7	233.9	49.068	314.78	268.11	244.28
49.768	250.51	223.98	241.95	49.768	249.28	228.13	257.51	49.767	222.23	266.18	281.7	49.768	361.08	360.28	357.99	49.769	416.66	355.66	396.21	49.765	366.62	417.44	421.61	49.768	238.54	222.34	282.09	289.29	49.768	358.69	282.48	292.93	49.77	351.75	332.08	287.01	49.767	219.94	207.98	261.66	287.71	49.77	320.25	239.72	233.61	49.768	314.57	268.32	243.07
50.468	249.56	222.9	241.93	50.468	248.89	227.56	253.74	50.469	219.06	265.16	281.71	50.468	360.96	358.81	359.16	50.467	416.69	341.89	396.41	50.465	366.2	417.58	421.92	50.469	238.63	222.92	287.47	289.49	50.469	358.82	282.67	292.63	50.469	352.06	331.29	287.87	50.467	220.08	208.39	261.99	287.09	50.468	319.77	238.77	237	50.47	314.46	268.74	243.92
51.166	250.12	223.04	242.82	51.17	249.32	226.92	249.71	51.167	217.97	265.38	283.04	51.169	360.96	358.14	359.28	51.167	417.67	342.32	396.48	51.163	367.05	416.54	422.64	51.167	238.73	223.43	283.6	290.02	51.169	358.54	283.31	296.87	51.169	352.21	331.41	287.12	51.169	226.33	208.41	262.43	288.06	51.168	319.52	238.6	243.51	51.168	313.81	277.59	245.54
51.869	249.32	223.28	242.36	51.868	249.12	227.56	249.78	51.869	217.92	270.77	283.5	51.868	361.75	357.66	359.36	51.867	417.7	342.93	396.65	51.869	367.72	417.21	423.02	51.868	238.19	223.72	279.21	289.8	51.869	358.5	283.22	301.88	51.87	352.56	330.74	287.52	51.869	224.8	208.42	262.19	287.67	51.869	319.39	238.66	239.63	51.868	314.37	278.26	246.93
52.567	250.59	223.28	243.2	52.57	249.76	226.68	250.71	52.569	218.24	272.8	284.25	52.569	368.62	367.28	359.76	52.568	416.76	340.7	396.43	52.569	367.57	416.99	422.46	52.568	238.37	224.06	278.23	289.29	52.569	358.86	283.36	291.39	52.57	352.26	330.25	289.11	52.567	217.24	208.39	262.11	288.32	52.568	319.22	239.25	234.38	52.569	315.01	277.4	246.78
53.268	250.83	223.83	242.44	53.268	249.75	226.88	251.35	53.268	218.11	273.22	284.97	53.269	367.39	361.81	363.01	53.269	417.48	341.47	397.62	53.265	367.46	418.8	422.14	53.269	237.93	225.96	277.95	289.98	53.269	358.95	283.15	291.41	53.27	352.09	331.15	289.51	53.267	216.93	208.52	262.44	288.09	53.27	319.18	238.55	232.69	53.268	314.68	274.01	247.8
53.968	250.86	223.6	242.97	53.969	249.77	227.16	251.67	53.968	218.13	268.58	284.65	53.969	364.87	359.42	373.09	53.968	418.25	340.81	409.16	53.965	367.73	420.65	422.9	53.969	238.22	231.98	277.86	288.95	53.969	358.83	282.6	292.58	53.97	352.38	330.46	290.52	53.969	217.95	208.52	262.99	288.86	53.968	319.58	239.26	232.73	53.968	314.72	273.01	247.54
54.668	251.16	224.21	243.35	54.668	249.88	226.81	256.89	54.668	218.22	266.33	285.32	54.669	365.74	357.51	365.99	54.668	417.88	342.43	405.46	54.669	367.45	419.41	422.65	54.669	238.79	227.84	277.48	295.42	54.668	358.65	286.92	291.86	54.668	351.84	329.5	294.01	54.669	217.97	208.55	263.48	294.98	54.668	319.18	239.49	232.02	54.668	315.33	271.23	248.13
55.368	251.52	224.22	243.29	55.37	251.06	228.82	255.07	55.37	218.85	265.62	285.28	55.369	362.69	357.95	360.43	55.368	418.23	343.93	401.94	55.369	367.1	418.37	423.71	55.367	238.45	222.86	276.82	304.76	55.368	359.73	288.8	291.26	55.37	351.87	330.51	295.87	55.367	218.9	208.58	263.71	293.39	55.366	322.71	248.51	231.73	55.37	314.83	269.98	248.71
56.068	251.9	224.85	243.48	56.07	250.4	236.97	251.08	56.068	218.44	264.93	285.73	56.069	361.94	357.88	362.44	56.067	418.61	344.2	400.01	56.067	367.88	416.45	421.66	56.068	238.8	222.46	276.16	305.64	56.069	364.44	285.09	291.56	56.069	352.05	331.01	290.99	56.067	219.34	216.22	263.25	290.89	56.065	327.77	247.98	231.26	56.07	316.3	269.16	248.69
56.768	252.63	226.05	245.83	56.768	250.68	248.31	251.06	56.768	219.03	265.34	285.45	56.769	362.56	358.69	362.28	56.768	419.72	343.62	399.06	56.765	367.79	417.04	420.53	56.768	239.31	223.13	276.58	307.44	56.769	374.04	281.15	291.46	56.77	352.32	330.83	288.47	56.769	219.36	216.66	263.77	292.54	56.765	319.37	242.55	231.62	56.769	319.55	268.52	249.04
57.467	252.54	230.9	253.68	57.468	251.04	243.6	250.86	57.468	219.35	265.47	285.87	57.469	362.41	358.35	359.23	57.469	418.53	344.4	396.08	57.465	367.78	416.99	421.33	57.467	246.61	223.96	276.22	308.83	57.469	371.21	281.96	290.84	57.469	352.72	330.78	287.49	57.469	220.13	210.94	263.44	290.11	57.466	315.99	239.42	231.7	57.467	316.32	269.01	249.61
58.167	252.64	230.36	256.2	58.168	260.22	239.03	251.52	58.168	219.05	267.69	286.26	58.169	366.8	365.7	362.96	58.168	418.55	344.82	396.49	58.164	367.59	416.7	421.95	58.169	244.09	224.63	276.04	304.69	58.169	360.54	279.81	291.74	58.169	352.44	330.85	287.01	58.168	220.03	208.51	263.22	291.35	58.169	314	239.09	231.49	58.168	313.51	268.2	249.91
58.868	253.28	228.27	252.1	58.868	257.84	236.16	251.74	58.869	219.19	267.91	286.31	58.869	367	361.82	362	58.869	419.22	354.38	396.16	58.87	368.53	419.73	424.46	58.868	238.16	224.59	276.6	296.38	58.869	365.73	279.31	291.4	58.869	352.59	331.41	288.02	58.87	220.83	207.88	263.24	290.59	58.869	316.81	239.36	234.51	58.867	313.34	268.01	250.1
59.568	253.76	226.67	251.65	59.569	252.37	232.09	251.7	59.568	219.39	267.97	286.87	59.569	365.06	352.68	358.63	59.568	420.17	353.95	395.95	59.57	367.8	419.17	423.82	59.568	239.71	229.95	276.41	294.85	59.569	363.97	278.86	290.93	59.569	352.38	331.72	288.31	59.568	221.28	207.2	262.63	290.66	59.57	317.07	239.47	240.87	59.565	312.74	268.52	250.48
60.268	253.77	226.16	252.47	60.268	248.07	230.76	251.63	60.27	219.25	266.4	286.86	60.269	363.6	355.55	359.03	60.269	419.81	343.88	395.94	60.269	367.79	420.79	423.59	60.268	241.42	231.81	276.98	293.87	60.269	357.65	284.66	291.58	60.269	352.62	331.26	289.08	60.267	221.37	208.19	265.18	293.51	60.27	318.37	238.81	240.79	60.267	312.32	268.64	250.52
60.967	254.83	226.07	254.08	60.968	245.85	229.4	252.69	60.97	219.51	265.45	286.27	60.967	363.72	353.73	363.58	60.969	419.97	349.47	396.25	60.965	368.01	419.47	422.72	60.968	240.66	225.63	275.2	293.35	60.97	356.74	287.37	291.54	60.969	352.62	331.31	289.62	60.969	221.21	208.79	269.84	291.95	60.969	318.2	239.71	235.85	60.967	312.41	268.94	250.31
61.667	254.81	227.16	252.07	61.668	246.45	230.16	251.76	61.67	219.23	264.9	286.3	61.67	363.93	355	361.12	61.669	420.23	342.65	395.54	61.665	368.25	415.81	422.46	61.668	240.99	222.87	283.21	293.68	61.67	355.76	285.33	291.66	61.668	352.13	330.5	290.09	61.668	221.26	208.75	270.85	290.99	61.669	318.74	239.82	232.76	61.669	312.35	268.15	249.98
62.367	258.92	226.61	251.36	62.368	246.66	229.57	252.39	62.368	219.36	264.9	286.49	62.368	363.92	356.35	360.29	62.369	420.91	339.64	396.44	62.365	367.65	416.14	424.47	62.367	241	224.38	285.38	293.26	62.369	356.29	281.43	292.36	62.37	352.57	331.99	290.41	62.368	221.43	209.29	268	290.57	62.369	318.96	240.32	232.02	62.369	312.31	268.11	249.85
63.068	259.31	226.79	250.63	63.068	247.06	228.53	252.92	63.069	219.4	264.53	286.35	63.068	363.95	357.45	360.42	63.069	421.46	341.95	395.63	63.063	368.86	415.59	429.59	63.069	241.03	224.69	283.62	293.57	63.069	356.61	278.35	292.8	63.069	352.83	331.7	290.71	63.067	222.13	209.55	267.71	290.41	63.069	319.01	239.9	230.87	63.068	312.44	274.37	249.76
63.767	257.31	227.49	249.64	63.769	246.72	228.93	253.17	63.77	219.2	264.98	285.98	63.768	363.96	358.5	360.97	63.769	421.47	342.1	395.39	63.764	368.56	415.48	423.06	63.769	240.96	225.18	281.35	292.72	63.769	356.73	279.65	291.92	63.769	351.99	331.68	290.66	63.767	221.82	209.58	267.3	290.51	63.769	319.29	239.99	231.48	63.764	313.16	277.24	250.34
64.469	257.82	231.74	249.37	64.469	247.02	229.08	253.04	64.469	219.41	264.94	286.5	64.468	365.2	358.67	360.76	64.468	420.09	346.79	396.64	64.467	368.08	415.85	421.13	64.469	240.57	225.54	279.55	292.65	64.469	356.85	280.34	292.37	64.469	352.27	331.34	291.19	64.467	221.95	209.5	265.41	291.06	64.469	318.76	239.9	231.68	64.467	313.55	274.82	249.9
65.167	255.8	231.87	249.03	65.168	248.07	228.45	253.25	65.168	219.22	265.1	286.66	65.168	364.48	358.59	360.9	65.17	420.21	341.45	396.25	65.167	368.37	419.34	419.3	65.169	240.56	225.72	279.64	293.01	65.168	357.5	280.7	292.63	65.169	351.15	336.66	291.68	65.167	221.72	209.78	264.52	291.46	65.169	318.78	239.96	238.1	65.167	313.26	271.82	250.45
65.867	252.94	229.75	248.47	65.868	247.86	227.44	253.33	65.868	218.98	265.5	285.97	65.868	365.18	359.1	361.43	65.868	419.77	341.91	396.1	65.868	368.78	419.29	419.56	65.867	240.46	226.02	279.77	293.15	65.868	357.24	280.89	291.9	65.869	358.11	337.33	291.55	65.867	222.2	209.73	264.9	290.24	65.869	319.43	239.93	238.09	65.867	314.5	271.68	249.93
66.568	254.55	228.49	248.6	66.568	248.8	226.5	253.4	66.568	219.85	264.79	286.73	66.568	365.34	359.68	361.97	66.568	420.48	342.53	395.37	66.564	369.12	424.19	420.51	66.569	240.94	226.07	279.75	292.2	66.567	357.09	280.11	291.93	66.57	365.6	337.42	292.26	66.567	222.43	209.85	264.63	290.4	66.564	318.92	240.22	235.64	66.569	314.4	268.02	250.21
67.268	255.69	228.64	248.65	67.268	247.88	226.18	253.53	67.268	220.29	265.06	286.68	67.268	365	359.23	362.55	67.27	419.5	341.92	396.63	67.264	369.04	420.95	421.62	67.267	240.81	225.67	279.55	292.46	67.267	357.41	280.47	291.51	67.269	359.4	335.19	297.08	67.266	222.57	210	265.41	290.35	67.268	319.13	240.11	232.82	67.269	315.12	267.75	250.65
67.968	255.8	229.36	248.1	67.968	247.99	226.44	254.33	67.967	220.5	265.6	286.61	67.969	365.71	359.13	361.89	67.969	419.49	343.84	397.24	67.964	369.22	416.62	419.69	67.969	241.22	226.02	279.37	292.76	67.967	358.09	279.68	292.21	67.97	351.58	335.38	298.71	67.968	223.14	210.22	264.65	290.49	67.968	318.68	240.28	232.2	67.967	314.56	269.1	250.71
68.668	255.62	230.43	248.37	68.668	248.19	226.47	257.44	68.667	220	265.65	287.04	68.669	365.22	359.12	362.86	68.669	419.91	342.73	396.33	68.667	369.25	415.67	420.67	68.667	241.58	226.32	279.75	291.74	68.667	358.41	279.6	291.76	68.668	347.96	332.76	294.24	68.668	223.32	210.44	265.47	290.28	68.669	319.01	240.04	231.96	68.668	314.77	268.37	250.84
69.366	256.08	229.35	248.22	69.37	248.87	226.22	256.38	69.368	220.22	265.28	286.82	69.369	365.63	368.72	363.19	69.368	431.07	343.58	395.74	69.367	369.44	415.47	420.33	69.369	241.41	227.39	279.1	292.12	69.367	357.94	279.51	291.76	69.37	346.05	331.68	287.14	69.369	223.33	210.27	265.76	289.94	69.367	319.2	239.71	231.25	69.368	314.91	267.94	251.06
70.066	256.51	230.14	248.69	70.069	249.22	225.58	252.06	70.067	219.68	265.11	287	70.069	365.42	372.58	363.5	70.069	430.98	343.06	395.68	70.07	369.23	414.88	421.86	70.069	241.55	235.52	278.61	292.55	70.067	359	279.51	291.38	70.068	347.53	330.79	285.95	70.067	223.31	210.46	265.42	290.61	70.067	319.06	240.13	231.96	70.067	315.45	267.73	256.19
70.766	256.7	229.89	248.6	70.768	249.06	226.01	249.67	70.769	219.45	269.9	286.8	70.769	366.46	358.01	374.99	70.769	420.37	342.84	395.68	70.768	368.86	413.65	421.54	70.767	242.39	233.93	279.06	292.44	70.767	358.58	286.36	291.5	70.77	348.26	331.25	284.38	70.767	223.88	210.98	265.67	291.09	70.769	318.95	239.96	232.49	70.769	314.94	267.39	258.92
71.468	257.25	230.27	248.33	71.468	248.96	225.4	249.39	71.469	219.58	271.57	287.07	71.469	366.66	358.73	376.48	71.469	416.6	344.26	396.32	71.469	369.48	419.64	422.1	71.467	242.03	227.72	278.76	292.69	71.469	358.43	287.34	294.45	71.47	348.04	330.15	285.08	71.467	223.26	210.73	265.2	291.1	71.468	318.97	239.89	232.12	71.469	314.6	268.3	244.44
72.166	257.95	230.28	248.89	72.168	249.34	225.69	249.83	72.167	219.85	267.63	286.9	72.168	373.53	357.17	368.47	72.169	412.17	343.25	395.16	72.167	368.83	423.42	422.53	72.167	242.43	224.03	279.42	292.82	72.169	358.5	283.16	298.75	72.169	348.91	330.23	286.1	72.166	223.58	210.8	265.53	290.29	72.168	319.31	239.37	232.84	72.17	314.67	267.99	242.09
72.867	257.72	231.11	248.96	72.87	249.2	226.03	250.72	72.867	219.7	265.29	286.49	72.868	373.14	356.84	364.32	72.869	412.15	343.39	396.17	72.869	368.85	422.85	421.98	72.868	242.63	224.15	279.53	292.83	72.868	357.59	280.58	297.08	72.865	349.22	330.38	286.37	72.867	223.71	211.28	265.9	293.19	72.867	319.12	239.62	232.61	72.868	314.53	268.64	242.6
73.567	257.57	231.84	249.29	73.569	249.54	225.8	251.56	73.567	219.79	265	287.19	73.568	371.05	357.79	365.11	73.569	412.17	343.31	396.29	73.569	368.74	419.95	421.34	73.569	246.66	224.6	279.83	292.55	73.568	357.75	278.02	290.6	73.569	349.33	329.81	287.02	73.568	231.56	211.25	266.03	292.2	73.569	319.21	239.73	232.52	73.568	314.46	272.99	243.62
74.268	258.04	230.84	249.38	74.269	249.48	227.76	251.86	74.269	219.89	264.17	287.43	74.268	369.44	358.44	366.79	74.269	411.98	345.31	396.08	74.267	368.77	416.72	422.21	74.267	248.8	225.05	278.18	293.17	74.268	358.27	279.5	291.04	74.271	349.36	329.89	287.39	74.268	227.43	211.64	265.28	293.05	74.268	318.75	240.37	233.26	74.27	314.52	274.16	243.22
74.967	258.87	231	249.61	74.97	249.79	227.17	252.03	74.968	219.83	264.02	288.04	74.968	366.87	359.6	363.7	74.97	413.39	346.79	395.88	74.968	368.56	414.84	421.76	74.967	246.17	226.29	283.37	292.93	74.968	359.24	279.83	291.26	74.969	349.23	330.08	288.33	74.968	218.77	211.8	264.86	292.73	74.968	320.17	242.24	233.28	74.97	314.21	275.73	244.02
75.666	258.81	232.52	249.53	75.669	250.19	226.51	252.34	75.668	220.11	264.47	287.4	75.668	365.79	360.14	366.16	75.668	414.1	346.66	395.55	75.668	368.57	414.18	421.16	75.67	239.04	226.93	289	292.71	75.669	358.04	280.05	291.02	75.669	349.1	330.03	288.6	75.668	219.86	211.73	265.84	292.06	75.668	325.79	247.84	233.23	75.668	314.78	269.88	244.74
76.366	260.84	235.3	250.01	76.368	250.6	226.81	252.14	76.368	220.01	264.16	287.24	76.37	366.26	360.28	363.6	76.368	413.01	345.87	396.02	76.367	369.82	413.94	421.14	76.367	241.65	227.09	285.04	292.51	76.369	358.59	280.74	290.12	76.369	349.66	329.69	289.9	76.368	221.67	212.45	265.45	292.07	76.368	326.23	245.41	233.55	76.368	315.07	269.3	246.7
77.069	263.84	233.35	250.19	77.07	250.52	226.27	252.44	77.068	220.05	264.35	287.12	77.068	366.81	360.63	361.68	77.07	413.23	344.85	395.94	77.069	369.72	413.02	422.04	77.068	243.02	226.78	284.94	293.07	77.068	358.86	279.9	290.69	77.069	349.36	329.1	289.99	77.068	222.63	212.42	268.4	292.86	77.068	318.06	239.91	233.24	77.068	314.22	270.76	248.02
77.768	263.66	230.66	249.6	77.764	255.07	226.46	253.02	77.768	219.94	263.89	287.06	77.77	367	360.91	364.35	77.77	413.81	345.43	397.57	77.769	368.82	418.84	422.54	77.768	242.6	227.11	283.77	292.68	77.769	359.02	278.62	290.41	77.769	349.29	328.98	290.29	77.767	222.78	212.84	273.41	292.21	77.768	316.09	238.66	233.74	77.767	313.77	269.84	248.23
78.466	259.3	232.49	250.18	78.468	260.97	226.39	257.04	78.467	219.76	264.07	287.46	78.468	367.1	361.16	368.09	78.469	415.11	345.03	409.27	78.469	368.93	419.86	421.98	78.468	242.95	227.2	282.24	293.1	78.468	359.63	278.38	290.6	78.469	350.11	329.79	290.38	78.467	223.45	212.46	272.61	291.75	78.47	317.85	238.61	233.47	78.469	314.63	271.53	247.99
79.168	257.12	232.95	250.4	79.168	257.09	226.2	255.88	79.169	219.64	264.42	287.42	79.169	367.46	360.86	372.58	79.169	415.22	344.43	404.65	79.169	369.39	420.08	421.27	79.168	242.88	233.22	280.45	293.11	79.168	359.34	277.86	290.46	79.168	350.32	330.04	290.68	79.168	223.67	212.74	271.24	293.35	79.166	317.53	238.02	233.43	79.168	314.9	267.96	248.47
79.867	261	233.13	251.2	79.868	249.73	226.63	250.22	79.868	219.48	264.03	287.84	79.869	367.34	361.6	373.34	79.869	416.84	364.42	401.48	79.869	365.25	416.59	423.28	79.869	243.46	234.63	280.67	293.26	79.868	358.91	277.58	294.2	79.87	349.54	330.26	291.13	79.868	223.55	213.15	270.99	291.61	79.864	319.53	238.83	233.68	79.868	313.73	268.4	248.29
80.568	262.54	233.28	251.54	80.569	244.28	226.44	251.47	80.567	219.8	263.81	287.55	80.569	368.66	362.15	370	80.569	417.15	359.46	401.67	80.568	376.24	413.59	429.07	80.569	243.7	229.33	281.01	292.89	80.568	358.69	276.96	294.3	80.57	350.1	330.76	291.08	80.568	224.27	213.63	268.68	291.86	80.564	320.91	238.89	234.11	80.567	314.41	268.58	248.5
81.267	261.87	233.33	260.52	81.269	244.61	226.82	251	81.268	219.5	264.18	288.2	81.269	368.59	362.38	365.06	81.269	418.06	347.73	398.02	81.268	366.86	412.88	426.01	81.269	243.74	224.72	280.75	293.83	81.268	358.3	276.47	291.47	81.268	349.84	330.48	291.73	81.268	225.18	213.72	267.67	291.94	81.264	318.16	238.76	234.15	81.267	313.79	268.44	248.82
81.968	258.63	235.93	264.35	81.967	244.5	226.91	250.76	81.97	219.5	265.76	287.61	81.967	368.88	362.99	363.77	81.969	418.47	356.18	396.03	81.968	361.43	411.94	420.63	81.969	243.9	225.06	280.37	293.41	81.968	358.52	276.69	291.9	81.968	349.78	330.24	291.22	81.968	225.09	213.85	267.23	293.41	81.965	318.53	238.94	234.06	81.969	314.51	268.04	249.04
82.668	258.16	242.68	265.37	82.669	245.09	227	251.38	82.668	219.88	272.46	287.46	82.668	369.64	362.81	363.77	82.669	418.81	345.95	396.16	82.668	362.41	412.36	419.09	82.669	243.79	225.68	280.26	293.09	82.669	358.18	277.23	292.37	82.668	350.41	330.08	290.87	82.667	225.42	214.31	266.95	294.16	82.665	318.56	238.73	233.98	82.667	318.73	267.62	248.61
83.368	258.76	237.17	262.33	83.369	245.92	226.34	251.71	83.368	219.33	273.65	287.2	83.368	369.32	375.69	363.27	83.369	418.32	339.96	395.46	83.368	364.85	418.29	419.56	83.369	244.17	225.82	280.64	293.91	83.369	358.45	276.12	291.72	83.368	350.63	331.46	291.26	83.367	232.45	214.19	266.98	293.06	83.368	317.88	239.92	233.9	83.369	317.94	267.39	248.82
84.068	259.97	234.14	262.47	84.067	246.69	226.19	251.82	84.068	219.39	266.87	287.54	84.068	369.91	374.97	363.94	84.068	417.54	342.31	396.33	84.068	365.12	416.95	419.19	84.069	244.57	226.54	281.17	293.24	84.069	358.18	275.47	291.9	84.069	350.53	330.79	291.12	84.066	227.59	214.9	267.94	299.26	84.069	318.43	239.43	233.3	84.069	314.79	267.73	249.34
84.769	260.66	233.43	257.42	84.767	246.75	226.51	251.73	84.768	219.62	265.36	287.33	84.767	369.49	362.71	364.74	84.768	417.06	343.81	394.75	84.768	365.31	421.71	419.99	84.769	244.71	227.07	281.08	292.73	84.769	358.75	284.88	291.41	84.768	350.62	330.89	291.8	84.768	221.22	215.01	267.95	306.98	84.769	318.64	239.86	233.84	84.769	312.38	267.14	248.99
85.469	261.7	235.08	256.85	85.468	247.24	225.87	252.41	85.468	219.72	264.77	287.38	85.469	369.96	361.25	365.25	85.469	419.65	343.99	394.64	85.468	365.62	417.65	420.65	85.47	245.25	227.71	280.8	293.81	85.471	358.53	285.96	291.83	85.47	349.8	332.83	291.59	85.469	223.73	215.29	268.15	306.08	85.469	319	239.79	234.34	85.469	312.38	267.65	255.55
86.167	262.6	234.94	255.54	86.169	247.77	226.4	252.02	86.168	219.08	264.32	287.87	86.167	370.54	364.32	366.09	86.169	419.56	345.29	395.2	86.167	366.41	414.79	420.29	86.169	245.78	227.72	280.8	293.27	86.169	358.18	280.78	291.11	86.168	350.46	337.83	292.25	86.167	225.23	215.64	268.4	305.15	86.169	318.57	240.06	234.03	86.169	312.46	267.6	247.49
86.869	262.83	235.4	255.34	86.868	247.6	225.83	252.01	86.867	219.67	263.87	286.52	86.867	370.97	365.37	365.38	86.869	419.53	344.97	395.17	86.868	366.93	413.62	421.21	86.869	245.92	228.01	280.55	293.52	86.869	358.59	280.28	291.67	86.868	349.82	337.76	292.26	86.866	225.5	215.91	268.76	303.4	86.867	318.39	239.83	234.44	86.87	311.96	267.26	242.45
87.569	263.18	234.91	254.88	87.568	247.98	227.1	257.22	87.569	219.27	263.83	286.31	87.569	370.56	364.51	366.09	87.569	420.38	353.34	395.71	87.567	366.83	412.35	422.28	87.569	245.53	228.17	285.86	294.73	87.568	358.27	277.27	290.95	87.568	349.36	335.81	291.9	87.567	225.5	215.39	268.85	300.8	87.568	317.89	240.1	234.4	87.569	311.97	266.72	243.79
88.269	264.06	234.98	254.96	88.268	248.4	227.5	256.34	88.269	219.85	263.43	287.07	88.268	375.66	363.58	366.5	88.267	423.84	345.14	396.52	88.267	367.1	411.52	420.98	88.269	245.81	228.47	288.87	294.51	88.268	358.48	278.97	291.26	88.269	350.16	334.26	291.72	88.268	225.5	215.47	269.19	297.95	88.268	318.03	239.86	234.92	88.269	311.84	268.19	242.74
88.969	264.86	235.8	255.76	88.968	248.66	226.18	252.65	88.967	219.69	267.97	286.97	88.968	377.9	362.98	366.8	88.969	436.91	342.7	397.4	88.969	367.03	412.12	422.38	88.97	245.8	228.42	286.56	294.05	88.968	358.17	278.57	290.82	88.969	350.06	334.65	291.55	88.968	225.59	215.39	268.3	296.75	88.968	318.05	239.88	234.7	88.968	311.85	267.84	243.95
89.669	264.06	235.74	255.6	89.668	249.05	225.57	250.17	89.667	219.32	270.09	286.71	89.67	374.17	363.44	366.76	89.669	429.33	343.2	396.12	89.667	366.93	418.91	422.1	89.668	246.26	228.36	285.54	294.36	89.668	357.95	278.04	291.1	89.669	350.78	332.05	291.71	89.669	225.99	215.78	268.36	298.08	89.668	318.18	240.45	234.14	89.668	312.21	275.27	244.99
90.368	264.64	235.86	255.52	90.368	249.28	225.72	249.57	90.368	219.3	265.34	287.47	90.369	370.25	362.88	367.03	90.369	423.37	339.98	396.87	90.367	367.77	420.28	422.2	90.37	246.21	228.72	284.33	294.87	90.368	358.46	277.72	291.17	90.37	350.47	331	292.47	90.369	226.51	216.02	269.89	297.28	90.367	318.28	240.62	234.57	90.369	311.67	277.05	246.52
91.07	264.95	236.46	255.47	91.069	257.57	226.39	249.83	91.068	219.21	264.23	287.28	91.069	372.72	363.98	367.58	91.068	416.37	341.91	395.89	91.067	367.13	417.59	421.92	91.068	246.45	228.73	285.76	301.35	91.068	358.68	276.57	291.39	91.07	350.52	330.59	292.67	91.067	226.48	216.34	272.92	296.54	91.069	317.87	240.31	234.24	91.07	312.19	276.02	247.78
91.768	264.98	236.37	255.29	91.769	257.46	226.5	250.98	91.767	218.88	263.56	286.84	91.769	371.87	375.18	367.53	91.769	414.63	342.71	396.41	91.769	367.4	414.29	422.18	91.77	246.56	230.86	286.42	310.22	91.768	358.54	277.26	291.84	91.768	350.51	330.77	296.95	91.769	226.69	216.38	277.21	297.75	91.767	318.34	239.92	235.12	91.77	312.95	274.48	248.8
92.468	265.41	236.42	255.03	92.468	249.77	226.83	251.39	92.467	219.65	263.67	287.46	92.469	371	368.98	367.3	92.469	414.38	342.51	395.81	92.468	366.98	413.49	422.29	92.468	246.8	235.37	285.61	308.09	92.468	357.82	277.14	291.53	92.47	350.61	329.87	300.4	92.469	226.64	216.57	273.44	297.33	92.468	318.4	239.39	234.55	92.468	314.86	272.89	249.09
93.168	266.26	236.02	254.86	93.168	245.88	227.05	251.62	93.167	219.63	263.42	287.33	93.169	373.94	364.39	367.33	93.167	415.25	343.28	396.68	93.168	366.96	412.67	422.11	93.168	246.71	233.85	285.39	307.38	93.168	372.99	277.59	291.42	93.169	350.31	330.1	295.84	93.168	226.94	217.1	274.98	297.03	93.168	318.28	240.09	234.86	93.168	316.61	271.39	249.28
93.868	266.46	236.8	255.29	93.868	245.05	227.25	251.88	93.867	219.04	262.67	287.31	93.869	372.47	364.49	371.82	93.869	415.96	345.28	403.19	93.869	367.3	412.58	423.37	93.867	249.72	227.13	285.32	300.76	93.868	372.82	277.52	291.32	93.869	350.69	329.45	289.2	93.868	226.87	216.76	272.47	297.81	93.869	318.64	239.68	234.54	93.868	312.63	270.33	248.98
94.568	266.26	237.27	255.18	94.569	244.6	226.3	251.35	94.568	219.01	263.3	286.77	94.568	371.09	363.75	383.7	94.567	414.48	346.43	406.72	94.569	366.87	412.13	422.43	94.567	255.1	225.97	284.77	299.84	94.568	365.75	277.02	291.63	94.568	350.95	330.17	284.91	94.569	227.05	217.24	270.68	297.6	94.569	317.78	239.89	235.24	94.568	311.37	269.94	249.83
95.267	265.72	237.28	255.58	95.269	245.29	226.17	252.13	95.268	219.12	263.24	287.45	95.27	371.85	370.19	381.19	95.269	416.05	347.55	402.32	95.267	367.54	418.13	422.45	95.27	252.48	227.15	284.82	298.01	95.268	356.13	276.56	291.52	95.268	350.49	330	283.95	95.269	227.93	217.37	270.47	296.97	95.268	318.24	239.92	234.7	95.27	311.65	269.8	249.55
95.968	274.12	237.42	255.61	95.965	246.09	226.87	252.25	95.967	219.19	263.48	287.7	95.968	371.76	367.32	377.35	95.968	415.89	347.01	399.13	95.968	367.32	420.91	421.94	95.968	247.98	227.14	284.49	298.71	95.968	355.1	276.74	290.85	95.968	350.4	330.61	282.58	95.968	228.09	216.95	270.29	297.19	95.969	318.26	239.97	234.61	95.969	310.52	269.44	249.5
96.667	272.61	237.89	255.61	96.665	247.53	226.83	251.96	96.667	219.15	263.98	287.39	96.67	372.07	365.78	364.99	96.669	417.2	347.25	400.49	96.67	367.33	420.41	421.32	96.669	247.15	227.67	284.98	298.96	96.668	354.42	276	300.69	96.668	350.36	329.27	284.49	96.67	227.63	217.12	269.78	297.77	96.669	318.4	239.66	234.6	96.67	310.86	268.73	249.4
97.367	272	238.35	255.78	97.37	247.32	245.69	251.99	97.369	219.44	264.17	287.84	97.37	372.28	364.44	365.04	97.368	416.48	345.18	402.28	97.368	367.7	416.04	420.97	97.369	247.25	229.03	284.87	298.85	97.37	354.07	276.71	293.84	97.37	349.71	329.59	285.81	97.368	228.37	217.21	269.93	297.73	97.369	318.18	239.76	235.32	97.368	310.48	268.78	249.87
98.069	266.66	238.49	256.36	98.07	247.9	247.95	252.55	98.068	219.69	263.41	287.27	98.07	373.01	364.75	363.88	98.068	416.62	344.85	399.36	98.068	367.88	413.53	431.02	98.069	247.83	230.24	285.15	299.03	98.069	354.21	276.13	291.04	98.068	349.99	330.49	286.24	98.068	228.68	217.46	270.36	297.5	98.069	318.02	240.03	235.59	98.07	310.86	267.76	250.4
98.767	264.45	239.24	256.58	98.764	248.37	242.9	252.69	98.768	219.54	263.03	287.29	98.77	373.34	364.38	364.64	98.768	424.1	346.1	399.77	98.77	367.61	412.5	425.71	98.769	248.15	230.81	285.46	298.88	98.768	354.87	276.35	293.21	98.768	363.86	330.53	287.51	98.768	229.32	217.81	270.9	297.49	98.769	318.63	240.1	235.29	98.768	314.37	267.57	249.9
99.467	267.53	248.5	256.22	99.464	248.35	248.94	253.1	99.468	219.33	263.57	287.23	99.47	373.58	365.3	365.24	99.468	433.54	345.85	398.14	99.468	368.19	412.57	423.74	99.469	248.13	230.89	286	299.04	99.469	354.92	277.37	292.03	99.468	360.78	330.3	287.61	99.468	229.19	217.69	271.19	297.87	99.468	318.58	240.01	236.95	99.468	314.13	267.18	250.06
100.167	265.97	252.1	256.77	100.168	249.15	253.85	252.81	100.168	219.63	263.43	287.86	100.17	374.16	371.51	366.15	100.17	429.57	357.19	397.36	100.17	367.81	411.8	418.56	100.169	248.97	231.18	285.28	298.39	100.17	354.95	277.53	290.87	100.167	352.73	330.72	287.38	100.169	229.66	217.93	270.86	297.35	100.17	318.63	239.92	244.1	100.167	312.45	268.04	255.88
100.867	269.78	243.89	256.9	100.868	249.45	252.99	253.16	100.868	219.24	264.04	287.83	100.87	374.27	364.7	369.45	100.868	422.19	363.08	396.17	100.87	367.6	413	418.76	100.868	248.3	231.35	285.31	298.82	100.868	355.59	276.98	290.76	100.869	350.54	330.7	288.3	100.869	229.68	218.2	271.19	297.47	100.869	317.67	240.39	239.8	100.867	312.58	267.64	254.75
101.567	270.63	239.98	257.14	101.568	249.58	248.3	256.51	101.567	219.37	264.27	287.28	101.569	373.79	367.45	375.59	101.568	417.09	351.98	396.88	101.57	367.54	417.45	418.12	101.568	248.98	237.26	285.77	299.58	101.568	355.98	277.86	290.97	101.567	346.39	331.09	289.94	101.568	230.14	218.56	271.29	298.19	101.569	318.12	240.64	235.22	101.568	311.53	267.81	242.35
102.268	272.25	238.88	256.76	102.268	249.91	245.5	255.96	102.269	219.39	263.48	286.75	102.269	373.9	366.03	369.56	102.269	414.84	354.37	396.76	102.269	368.3	424.27	419.07	102.269	249.1	238.19	285.78	299.33	102.268	362.87	277.61	290.75	102.268	345.49	330.25	288.5	102.268	229.87	218.38	271.8	298.13	102.269	318.5	240.39	233.37	102.268	311.24	267.94	242.98
102.968	267.48	238.72	257.17	102.965	250.09	241.62	252.65	102.969	219.03	263.65	292.79	102.969	374.18	366	367.77	102.969	415.67	357.21	396.03	102.97	368.31	420.48	418.89	102.969	249.51	233.26	285.37	299.67	102.968	368.25	277.03	290.59	102.968	346.46	330.51	289.03	102.97	230.7	218.45	271.58	297.76	102.969	319.1	240.42	232.97	102.968	310.59	267.53	242.07
103.668	267.62	240.43	257.46	103.667	250.44	237.04	250.29	103.669	219.39	263.66	292.95	103.669	375.3	365.85	367.28	103.669	415.79	344.52	395.93	103.668	367.65	417.4	419.05	103.669	256.14	229.11	286.92	299.67	103.668	365.73	283.38	290.45	103.668	347.95	330.63	288.99	103.668	230.8	218.53	271.99	298.42	103.669	319.54	240.68	232.88	103.668	310.12	268.39	243.61
104.369	268.5	239.58	257.4	104.37	250.36	235.97	249.79	104.369	219.15	269.42	289.98	104.369	375.49	367.42	380.35	104.369	415.01	348.31	395.61	104.37	368.63	415.58	420.42	104.369	254.05	230.06	293.35	300.37	104.368	359.66	284.68	291.22	104.364	348.89	330.79	289.22	104.368	230.94	218.3	271.76	297.76	104.368	318.92	240.89	233.63	104.37	310.84	277.79	243.99
105.067	269.19	239.06	269	105.068	250.86	234.59	250.39	105.068	218.86	271.16	284.56	105.068	376.2	367.5	375	105.069	415.54	343.63	395.87	105.068	368.81	414.03	420.31	105.069	248.5	230.61	297.07	300.97	105.065	354.47	280.59	290.46	105.067	349.18	330.51	290.17	105.068	231.05	218.85	272.12	297.31	105.07	319.01	240.01	233.53	105.069	311.39	280.19	245.14
105.769	269.98	239.87	269.31	105.769	250.88	234.4	251.05	105.768	219.47	269.25	283.06	105.769	375.92	367.91	373.8	105.769	416.25	342.72	396.42	105.768	367.93	413.65	419.27	105.768	248.81	231.31	292.07	301.48	105.77	354.44	280.53	290.35	105.768	348.98	330.62	290.18	105.768	231.76	219.18	274.69	298.12	105.769	319.49	240.42	233.52	105.769	312.15	277.05	246.23
106.467	270.95	240.32	268.68	106.466	251.37	234.17	255.72	106.468	219.93	265.46	279.54	106.469	376.74	367.7	370.86	106.468	416.37	344.92	396.34	106.468	368.51	412.7	420.78	106.47	250.55	232.07	291.73	300.9	106.47	354.75	277.5	290.23	106.468	348.97	330.82	290.04	106.468	238.23	219.46	278.3	300.41	106.469	318.72	239.96	233.36	106.468	312.94	273.6	247.83
107.168	271.53	240.06	267.8	107.17	251.78	233.18	255.52	107.17	222.97	264.29	279.16	107.168	376.32	369.38	372.7	107.168	416.55	345.85	396.29	107.168	368.37	412.5	421.16	107.169	251.04	232.96	290.37	302.04	107.168	354.52	278.22	290.3	107.17	349.64	331.13	290.31	107.167	233.74	219.32	280.79	308.56	107.169	319.23	240.64	233.96	107.168	313.28	274.43	248.99
107.868	271.74	240.73	267.77	107.869	251.14	232.69	250.34	107.869	223.06	263.6	279.31	107.87	376.39	369.48	370.82	107.869	417.66	344.88	396.37	107.868	368.77	412.14	420.4	107.87	250.72	233.51	289.31	302.34	107.868	354.59	278.12	289.92	107.868	348.89	330.23	289.92	107.867	225.09	219.48	279.37	308.33	107.869	318.72	240.55	233.96	107.869	312.9	270.54	248.79
108.568	271.96	244.46	264.44	108.57	251.53	241.01	250.75	108.568	222.3	263.49	278.86	108.568	376.48	369.04	368.42	108.567	416.6	346.01	396.53	108.567	367.77	412.67	421.78	108.57	250.64	234.42	289.45	302.27	108.568	354.86	278.64	290.82	108.568	348.46	331.07	289.86	108.567	226.24	221.89	278.8	306.99	108.567	319.1	239.83	233.95	108.569	313.02	270.69	249.89
109.268	272.76	245.17	263.52	109.268	251.57	237.49	249.85	109.268	220.25	262.91	283.65	109.268	377.51	369.04	370.22	109.269	416.5	344.97	397.44	109.269	364.48	413.57	421.51	109.27	251.51	234.7	289.08	303.74	109.268	355.33	278.48	291.14	109.269	347.85	331.2	290.58	109.267	229.19	228.74	277.38	303.41	109.269	318.86	240.55	234.08	109.269	313.82	271.11	249.68
109.97	272.07	241.91	263.5	109.966	251.9	234.13	250.56	109.968	218.76	262.84	284.09	109.968	383.69	372.73	370.37	109.969	416.09	355.56	397.4	109.969	374.9	420.6	421.06	109.97	251.6	234.94	289.22	309.01	109.969	354.81	277.19	291.04	109.97	347.32	336.55	289.6	109.967	229.37	228.22	275.26	303.79	109.969	319.26	240.04	234.39	109.969	314.06	271.29	250.26
110.668	272.64	240.96	261.64	110.668	252.16	232.98	251.13	110.668	217.85	263.19	281.14	110.671	385.58	368.22	370.89	110.667	417.33	342.78	397.25	110.669	365.82	417.57	421.38	110.67	252.55	234.71	288.98	313.84	110.669	354.43	276.46	291.47	110.67	347.59	335.05	291.05	110.667	230.28	223.69	274.72	303.76	110.669	318.73	240.38	234.16	110.669	313.14	270.81	249.53
111.369	272.82	241.01	262.2	111.37	251.95	231.9	251.36	111.368	217.32	263.46	281.08	111.369	378.62	367.24	371.85	111.367	417.71	342.09	397.47	111.367	361.02	420.27	421.54	111.368	252.09	235.42	289.41	309.25	111.367	354.97	276.01	290.86	111.369	347.56	335.41	290.16	111.368	230.29	220.36	274.78	302.27	111.368	319.12	240.28	234.46	111.369	316.71	270.85	250.35
112.067	272.66	241.54	261.43	112.069	251.92	230.88	251.41	112.068	217.47	263.53	281.84	112.07	375.32	368.96	370.06	112.068	429.43	345.55	397.82	112.069	363.22	416.44	421.25	112.07	252.15	235.72	289.9	306.43	112.069	354.89	276.12	291.42	112.069	347.73	331.35	290.25	112.067	230.28	219.08	274.28	302.16	112.068	319.42	240.9	234.44	112.069	319.5	269.85	249.77
112.766	272.81	241.32	261.41	112.769	252.01	230.38	251.6	112.767	217.34	263.8	282.71	112.768	376.27	370.54	370.21	112.769	432.08	344.06	408.81	112.769	364.1	414.22	421.76	112.768	253.15	240.97	290.22	305.73	112.769	355.28	276.32	290.4	112.769	347.89	332.14	293.21	112.769	231.53	219.3	274.22	302.62	112.77	319.4	247.05	234.88	112.768	317.01	269.18	250.17
113.468	272.97	241.16	261.3	113.465	251.68	230.51	251.86	113.469	217.22	263.43	283.4	113.47	376.43	370.39	370.49	113.468	426.17	343.97	407.51	113.469	364.42	412.92	420.33	113.468	252.8	242.71	289.47	305.75	113.467	355.42	276.31	290.92	113.468	356.11	330.48	294.88	113.469	231.79	220.49	275.7	302.05	113.464	319.06	245.17	235.1	113.469	314.63	268.82	249.95
114.166	273.77	241.21	260.83	114.169	251.45	230.02	251.75	114.168	217.36	263.43	283.43	114.168	379.5	373.28	371.66	114.168	420.87	344.18	405.09	114.168	365.01	412.17	421.49	114.168	253.87	239.3	290.49	305.98	114.169	354.89	277.45	296.26	114.169	359.82	330.54	296.56	114.167	232	220.42	276.58	302.22	114.168	318.75	241.75	235.12	114.169	312.49	268.81	249.95
114.868	273.15	242.03	260.27	114.867	257.5	230.45	252.55	114.868	217.42	263.43	284.35	114.868	381.39	364.34	381.45	114.868	416.42	346.54	401.02	114.868	365.71	410.8	421.52	114.868	253.68	232.96	290.26	306.27	114.869	355.47	276.59	298.35	114.869	352.91	329.66	288.86	114.868	232.44	221	276.84	302.36	114.868	318.88	238.58	234.39	114.869	312	268.82	250.29
115.568	277.57	247.8	260.05	115.569	260.37	229.79	254.9	115.568	217.37	263.51	284.44	115.57	377.38	364.63	382.97	115.568	415.27	346.88	399.81	115.568	366.19	410.63	420.94	115.568	254.18	233.76	290.47	306.67	115.569	355.55	277.48	292.18	115.568	351.15	329.91	285.53	115.568	233.13	221.15	276.37	301.25	115.569	318.91	238.36	235.07	115.569	312.9	268.44	249.77
116.268	278.92	246.35	259.48	116.269	255.59	229.11	255.89	116.268	217.52	264.26	283.73	116.269	379.03	367.29	381.71	116.268	414.99	345.17	397.62	116.268	366.16	412.33	421.58	116.268	254.88	234.4	290.23	306.21	116.268	355.4	276.49	288.59	116.27	346.51	329.61	282.78	116.268	233.09	221.37	275.55	302.56	116.27	318.84	237.91	234.07	116.268	311.48	268.77	249.89
116.968	273.23	242.32	259.47	116.967	250.77	229.59	253.11	116.967	217.64	267.66	283.76	116.969	378.47	369.7	373.4	116.968	415.52	346.62	396.6	116.968	366.71	412.23	421.41	116.969	255	234.86	290.4	306.33	116.968	356.28	277.79	291.64	116.969	345.11	329.37	283.34	116.967	233.5	221.79	276.19	302.17	116.965	318.43	238.09	238.88	116.969	310.7	268.34	249.4
117.668	271.64	240.61	259.62	117.67	246.87	228.99	249.55	117.669	217.8	271.4	283.91	117.67	378.88	370.37	372.3	117.668	415.81	345.77	395.27	117.669	366.33	411.44	428.67	117.668	255.07	236.12	290.68	305.65	117.668	355.51	284.16	291.04	117.669	346.73	327.54	282.9	117.668	233.43	222.04	275.97	302.47	117.664	318.49	238.04	242.91	117.668	311.07	268.53	250.41
118.367	269.34	240.37	259.12	118.371	246.05	229.29	248.27	118.368	217.53	271.55	284.17	118.37	378.73	370.21	371.81	118.368	416.36	346.05	396.01	118.369	366.66	410.71	424.46	118.369	255	236.62	288.54	306.63	118.368	356.07	282.53	291.2	118.369	346.67	329.18	284.63	118.368	233.93	222.5	276.24	303.76	118.366	318.51	238.88	238.41	118.369	312.15	268.72	253.02
119.067	269.89	240.57	258.58	119.07	246.44	229.14	249.05	119.068	217.96	265.87	284.29	119.068	378.63	371.4	372	119.069	416.5	346.42	396.74	119.069	366.51	409.99	422.6	119.069	255.77	237.65	299.13	306.06	119.068	356.49	278.44	290.09	119.069	347.14	328.59	285.72	119.068	234.06	222.26	275.98	308.75	119.068	318.75	239.12	235.19	119.069	312.56	268.46	258.75
119.767	266.6	240.44	258.81	119.769	246.42	229.03	250.64	119.768	217.78	264.65	284.47	119.77	379.47	371.46	373.73	119.767	416.23	364.32	397.26	119.769	367.01	410.6	420.28	119.767	255.35	238.83	302.1	305.86	119.77	356.01	278.8	290.39	119.769	347.33	328.97	286.51	119.768	234.76	222.27	276.46	309.15	119.768	322.62	239.51	233.64	119.769	313.64	270.77	250.43
120.469	270.02	240.87	258.83	120.465	246.84	228.69	251.12	120.468	217.69	263.77	284.34	120.468	379.69	372.28	373.58	120.469	417.7	352.09	397.56	120.469	366.58	410.92	420.78	120.469	255.78	243.41	298.2	306.76	120.469	355.74	279.21	289.38	120.469	348.46	329.16	287.23	120.468	234.97	222.92	276.9	309.03	120.466	328.57	240.26	232.48	120.469	313.13	277.11	240.58
121.167	274.16	241	258.66	121.169	246.6	228.21	250.97	121.168	217.88	262.52	284.57	121.171	380.35	372.31	374.17	121.168	418.36	350.15	396.85	121.169	366.56	410.82	419.53	121.169	255.52	240.54	297.83	307.59	121.169	355.91	278.27	289.7	121.169	347.68	328.91	286.82	121.167	235.23	222.73	277.34	306.39	121.166	326.37	239.5	232.34	121.168	313.25	278.23	248.78
121.867	271.29	241.88	258.77	121.869	247.49	228.02	251.84	121.868	218.1	262.82	285.6	121.869	380.75	372.54	373.98	121.87	418.61	346.27	397.02	121.869	366.77	410.98	420.37	121.87	255.77	236.3	297.13	306.87	121.869	356.06	276.67	289.13	121.869	347.79	328.93	287.07	121.869	235.74	223.34	276.45	304.44	121.864	327.36	239.95	233.12	121.868	313.64	274.67	243.26
122.567	271.1	245.96	259.1	122.569	247.27	227.77	252.18	122.568	218.35	262.46	284.84	122.57	380.42	371.08	374.73	122.566	418.61	343.71	396.62	122.568	366.65	417.96	419.66	122.568	255.67	238.1	295.92	307.66	122.569	356.06	275.67	288.7	122.569	347.68	328.29	287.64	122.568	239.79	223.88	279.73	304.83	122.568	316.26	240.06	233.19	122.568	313.73	273.4	242.34
123.268	272	244.95	259.89	123.269	247.4	227.8	251.98	123.269	218.21	263.03	284.52	123.267	381.72	371.66	374.99	123.269	417.98	344.34	397.43	123.269	367.03	420.62	420.62	123.268	255.89	238.02	295.33	307.95	123.269	356.44	275.69	288.46	123.269	348.13	328.72	287.58	123.268	240.26	224.1	284.76	304.43	123.271	314.01	239.75	232.88	123.268	313.7	273.14	241.87
123.968	272.4	241.55	259.05	123.966	247.89	227.46	252.14	123.97	218.35	262.7	284.46	123.967	382.03	371.81	375.65	123.97	419.43	346.84	397.11	123.969	366.84	419.1	421.11	123.967	260.28	238.26	294.58	308.2	123.969	356.1	275.53	289	123.969	348.19	329.04	288.08	123.968	234.67	223.9	286.21	304.73	123.969	315.25	240.57	233.63	123.969	313.81	271.41	242.9
124.668	273.04	241.17	259.95	124.668	248.65	227.11	252.65	124.668	218.63	262.63	284.39	124.669	382.61	372.85	375.35	124.669	420.57	346.29	398.32	124.668	367.22	416.19	420.98	124.669	262.58	239.59	293.35	308.39	124.669	355.83	276.18	288.25	124.669	348.45	328.83	288.43	124.666	230.92	224.35	282.16	305.09	124.669	316.89	240.02	233.62	124.669	313.66	270.75	242.3
125.368	273.78	240.85	263.99	125.37	249.08	227.44	252.77	125.368	218.71	262.53	284.85	125.367	383.15	373.57	375.77	125.369	420.08	345.69	397.8	125.368	367.36	413.34	421.23	125.367	259.06	239.94	293.3	307.82	125.369	356.24	276.45	289.11	125.369	348.37	329.49	288.65	125.368	233.59	225.37	283.77	304.95	125.365	316.88	240.25	233.71	125.367	313.68	270.24	242.58
126.068	274.26	241.58	271.28	126.07	249.37	227.59	253.34	126.07	218.63	263.09	284.43	126.069	383.09	373.87	376.16	126.068	418.23	344.84	397.98	126.068	367.24	412.67	421.16	126.067	252.45	240.44	293.34	313.79	126.069	355.84	284.65	288.91	126.068	348.98	328.2	288.31	126.066	234.66	225.49	281.67	305.47	126.069	316.82	240.11	233.87	126.067	313.46	269.97	243.87
126.768	274.86	241.15	271.21	126.77	249.64	227.42	252.94	126.768	218.89	263.34	284.73	126.768	383.86	374.6	375.4	126.77	418.59	346.49	398.38	126.768	366.7	412.15	422.44	126.767	252.87	240.66	293.05	321.37	126.769	355.86	283.18	288.36	126.77	348.78	329.67	288.57	126.768	234.45	225.62	280.28	305.71	126.769	316.65	240.74	233.86	126.769	313.07	268.71	244.94
127.469	274.68	241.73	269.51	127.464	249.65	227.16	253.15	127.468	218.49	262.85	284.37	127.468	383.99	374.33	375.48	127.469	419.88	345.26	398.57	127.47	366.86	412.21	422.04	127.469	253.97	242.08	293.16	314.77	127.469	355.99	279.4	288.7	127.47	348.2	334.4	289.19	127.467	234.71	226.08	280.52	305.74	127.47	316.73	240.58	234.65	127.467	313.24	270.4	246.66
128.168	274.36	245.12	266.17	128.17	249.93	227.58	254.04	128.168	218.51	263.41	284.31	128.167	383.73	373.94	376.08	128.171	420.12	344.89	398.44	128.168	366.72	412	421.94	128.168	254.59	246.75	293.72	311.81	128.169	356.25	277.07	288.27	128.169	348.38	333.65	289.13	128.168	235.14	226.4	280.94	306.64	128.169	317.42	240.32	234.44	128.168	312.86	270.07	247.37
128.868	274.86	244.6	262.84	128.869	250.38	227.98	256.71	128.869	218.44	263.53	284.52	128.868	383.51	374.04	376.34	128.869	419.96	362.1	398.43	128.868	367.63	412.2	421.81	128.869	254.49	243.81	294.03	310.9	128.867	355.99	277.39	288.97	128.869	348.48	333.33	288.8	128.867	235.22	226.98	281.26	307.83	128.867	317.61	240.12	234.05	128.867	313.18	269.43	248.04
129.567	276	242.84	262.89	129.569	250.07	228.59	256.41	129.568	218.44	268.09	284.05	129.568	387.29	375.53	377.37	129.569	420.46	344.91	398.51	129.568	367.99	416.53	421.85	129.568	254.45	237.55	293.95	309.77	129.568	356.4	277.01	288.6	129.569	348.58	330.97	289.77	129.567	235.59	232.52	280.81	310.28	129.567	317.43	240.18	234.59	129.568	318.21	269.19	247.79
130.267	275.16	241.26	261.73	130.268	250.83	227.8	252.41	130.267	218.55	267.61	284.31	130.268	390.84	383	377.98	130.269	419.55	339.73	397.35	130.269	368.52	416.14	421.7	130.27	255.45	237.89	294.79	311.07	130.268	364.42	275.92	290.26	130.269	348.61	329.81	289.66	130.267	236.14	233.53	281.32	310.36	130.267	317.18	240.64	234.66	130.268	319.24	269.93	248.12
130.969	275.19	241.55	261.7	130.968	250.51	227.49	248.87	130.969	218.92	266.37	285.02	130.968	387.28	378.08	378.96	130.969	422.17	340.79	396.91	130.968	368.04	419.73	422.28	130.968	256.03	239.17	294.59	310.93	130.967	372.44	274.76	295.46	130.969	349.73	328.32	291.12	130.969	237	228.88	281.24	309.23	130.965	316.85	240.4	234.54	130.968	315.64	268.97	249
131.667	276.03	241.75	260.5	131.67	250.38	227.73	248.85	131.667	218.96	265.11	285.08	131.67	386.71	369.29	378.7	131.669	418.9	344.24	398.43	131.668	368.3	414.67	421.8	131.67	255.95	239.37	294.54	310.14	131.669	369.09	275.66	299	131.668	349.27	327.9	291.32	131.667	237.25	225.64	281.83	314.87	131.663	317.06	240.48	234.97	131.668	314.12	269.49	249.64
132.368	275.99	241.4	260.47	132.368	250.74	227.15	249.99	132.367	218.57	263.69	284.98	132.37	382.99	370.94	378.93	132.369	419.59	343.19	399.05	132.368	368.43	413.66	421.04	132.369	256.39	240.36	294.92	310.91	132.368	355.83	274.02	294.32	132.368	348.88	327.82	290.15	132.367	237.24	225.45	281.43	314.63	132.364	318.64	240.42	234.83	132.368	311.2	269.64	248.62
133.068	275.26	242.17	259.64	133.07	250.72	227.46	250.46	133.067	218.85	262.9	284	133.068	382.77	373.91	377.25	133.068	419.35	345.28	397.8	133.069	368.34	411.76	420.35	133.069	256.57	241.36	304.37	310.38	133.068	353.3	281.65	288.22	133.069	348.86	328.39	290.01	133.068	237.84	224.39	282.01	314.23	133.068	326.31	240.58	234.8	133.069	310.04	268.76	249.77
133.767	275.6	241.74	259.31	133.768	250.48	226.93	250.78	133.768	218.85	262.84	289.37	133.769	383.4	375.15	379.8	133.768	419.76	343.68	398.3	133.767	368.3	410.9	420.59	133.769	256.9	241.96	306.12	310.99	133.768	350.12	282.71	289.45	133.769	348.99	327.82	289.66	133.768	238	226.13	282.13	312	133.768	322.64	240.03	235.25	133.767	308.56	270.68	249.71
134.467	278.26	242.68	259.44	134.468	250.88	227.33	250.94	134.468	218.86	262.85	289.88	134.469	384.56	376.01	394.17	134.468	419.69	344.71	397.33	134.468	368.83	411.18	420.8	134.467	257.35	243.08	302.57	311.36	134.468	351.91	279.18	288.34	134.469	348.84	327.99	290.09	134.467	238.18	226.64	282.1	310.34	134.468	315.66	243.73	234.89	134.468	309.38	270.24	249.83
135.167	278.02	249.9	258.91	135.168	250.76	227.14	251.3	135.167	218.7	262.72	284.35	135.169	384.65	376.41	397.67	135.169	419.93	344.05	397.68	135.167	368.54	410.84	421.16	135.169	257.84	242.76	299.69	311.15	135.168	351.6	278.39	289.75	135.169	348.34	327.76	289.91	135.167	242.12	226.69	282.97	310.04	135.168	315.9	250.07	234.39	135.168	310.77	269.61	248.86
135.867	272.84	251.94	258.98	135.869	250.98	227.92	251.72	135.868	218.82	263.24	281.42	135.869	385.52	377.07	388.26	135.869	420.78	344.15	397.92	135.867	368.59	410.69	420.71	135.868	258.81	242.97	298.6	310.95	135.868	351.57	277.45	289.84	135.869	348.63	327.64	290.95	135.867	244.55	226.74	283.2	309.92	135.868	316.93	243.65	235	135.87	310.4	269.93	254.51
136.567	274.18	246.38	258.51	136.569	250.88	228.05	251.33	136.568	218.9	262.64	281.1	136.569	385.92	378.08	379.61	136.569	420.91	344.89	398.33	136.567	369.07	412.15	420.51	136.569	258.88	248.39	297.23	310.85	136.569	352.6	275.78	289.31	136.568	348.55	327.88	291.45	136.567	239.95	227.43	284.05	309.35	136.568	317.17	241.03	235.3	136.568	310.65	269.38	256.63
137.267	268.07	242.6	258.51	137.269	251.27	227.57	251.64	137.268	218.62	262.35	282.23	137.269	386.07	377.55	378.36	137.269	421.18	346.25	398.23	137.267	368.95	417.09	420.7	137.269	259.1	247.55	296.72	310.03	137.267	352.9	274.74	288.83	137.27	348.79	326.97	290.41	137.267	235.46	227.39	283.62	310.03	137.268	316.79	239.76	235.01	137.268	311.39	270.13	242
137.968	265.46	241.8	258.36	137.969	251.28	245.57	252.24	137.968	218.71	262.79	283.09	137.969	386.63	378.52	377.27	137.969	421.02	345.46	398.56	137.969	368.8	416.09	421.13	137.969	259.01	242.26	296.17	311.21	137.968	353.76	274.15	288.17	137.969	348.63	327.46	290.05	137.967	238.35	227.69	285.08	310.44	137.969	317.27	238.52	234.83	137.968	311.52	269.2	239.84
138.667	270.29	240.79	258.41	138.669	251.08	249.94	252.68	138.668	218.57	262.49	283.03	138.669	386.56	378.75	377.09	138.668	420.11	346.81	398.15	138.667	368.22	414.33	421.86	138.669	259.15	240.07	296.6	310.45	138.668	354.09	274.11	289.05	138.668	347.89	327.72	289.61	138.668	237.72	227.48	286.89	310.31	138.669	317.26	238.79	235	138.668	311.87	269.92	242.35
139.367	268.15	242.69	259.3	139.37	251.33	249.57	252.81	139.367	218.57	263.25	283.24	139.369	387.29	379.85	377.8	139.369	426.8	355.12	397.82	139.369	367.53	412.29	421.31	139.368	258.79	241.29	296.68	311.5	139.368	353.67	274.26	288.35	139.364	348.61	328.1	289.75	139.367	237.93	227.54	292.39	310.77	139.368	317.33	239.14	235.19	139.369	310.93	269.21	242.83
140.067	268.53	243.07	259.55	140.07	251.57	251.39	252.76	140.068	218.5	262.64	283.47	140.069	387.82	379.81	378.34	140.069	435.93	357.17	397.5	140.067	367.8	412.21	427.51	140.07	258.99	241.56	296.81	311.53	140.068	354.21	274.48	288.59	140.07	348.67	330.75	290.42	140.067	238.26	227.81	288.68	310.18	140.07	317.19	239.29	235.48	140.068	310.97	269.35	242.65
140.768	270.34	242.08	259.58	140.767	251.55	253.51	252.78	140.767	218.55	262.8	283.2	140.769	388.51	380.22	382.16	140.769	431.61	346.09	398.42	140.769	369.83	411.07	425.54	140.77	264.45	242.13	296.59	313.15	140.768	369.41	274.81	288.16	140.767	349.38	332.64	290.6	140.767	238.47	228.14	288.67	310.63	140.768	317.28	239.37	234.82	140.769	310.39	269.84	242.92
141.469	271.07	242.14	259.42	141.467	251.22	253.77	255.14	141.469	218.76	263.07	284.11	141.469	388.47	380.29	387.54	141.469	422.39	347.53	411	141.468	375.81	409.99	422.4	141.469	264.81	243.02	296.6	313.56	141.467	369.7	274.59	288.66	141.469	348.66	332.89	291.75	141.467	238.98	228.03	286.42	310.94	141.47	317.28	239.45	235.03	141.467	311.4	269.56	244.26
142.168	272.28	242.06	259.06	142.169	251.62	250.23	257	142.167	218.54	262.69	283.73	142.169	389.38	381.14	380.16	142.169	418.4	341.72	405.81	142.168	371.96	410.04	419.95	142.169	258.87	243.45	296.43	311.88	142.17	362.77	274.86	288.05	142.168	348.71	331	291.82	142.167	239.83	228.13	285.42	311.01	142.164	316.97	239.97	235.1	142.167	311.29	273.22	246.03
142.869	273.6	242.65	259.33	142.867	251.31	245.27	252.96	142.867	218.77	262	283.5	142.869	389.55	380.3	380.06	142.869	416.47	343.9	404.96	142.868	362.23	419.4	419.14	142.868	255.81	243.93	296.9	312	142.868	355.85	275.81	288.53	142.868	349.59	330.36	298	142.867	240.51	234.7	285.98	311.9	142.869	317.81	240.15	235.05	142.867	311.4	280.2	247.31
143.567	273.78	243.31	259.19	143.568	251.6	239.12	248.95	143.568	218.57	262.65	283.84	143.568	392.92	393.23	387.63	143.569	415.73	345.67	403.13	143.57	360.38	419.5	420	143.57	256.49	244.76	296.88	311.12	143.568	359.65	274.1	287.6	143.568	348.44	330	297.06	143.568	240.63	236.86	285.93	311.56	143.568	318.1	240.12	234.97	143.567	311.9	279.73	247.84
144.267	274.14	242.59	259.07	144.268	251.74	235.52	248.87	144.268	218.49	265.37	283.72	144.269	397.47	390.51	381.9	144.269	415.34	344.76	401.55	144.27	363.52	420.19	419.7	144.269	257.18	245.03	297.72	312.59	144.269	365.31	274.81	288.51	144.268	348.85	328.1	288.52	144.267	241.36	231.69	285.99	312.08	144.269	317.94	240.8	234.9	144.267	311.12	276.38	247.98
144.968	274.69	243.95	259	144.969	251.34	233.19	249	144.968	218.7	268.66	283.86	144.967	397.47	381.18	382.68	144.97	415	345.83	401.61	144.967	363.88	417.68	420.08	144.969	257.66	245.23	297.22	312.76	144.969	357.53	274.63	288.05	144.97	348.95	327.07	283.89	144.966	241.92	228	286.77	312.08	144.965	318.69	240.74	235.26	144.968	311.11	273.88	249.03
145.667	274.58	243.85	259.32	145.669	252.11	231.04	249.84	145.669	218.6	269.99	283.65	145.667	392.43	381.52	383.17	145.67	415.29	346.71	398.7	145.669	364.77	415.71	420.5	145.67	257.96	246.4	296.28	311.92	145.669	353.52	275.02	288.35	145.668	348.36	326.83	282.01	145.666	241.87	228.54	287.15	312.12	145.669	317.97	240.87	235.3	145.667	311.43	271.74	249.06
146.369	274.74	244.55	267.17	146.369	251.59	231.31	250.36	146.369	218.88	266.29	283.25	146.369	389.07	382.37	383.48	146.368	415.74	347.31	398.75	146.368	365.7	413.45	421.25	146.368	258.56	249.66	300.53	312.38	146.369	354.65	275.55	287.81	146.368	349.07	326.38	281.28	146.367	241.52	228.38	287.85	312.97	146.369	318.15	241.61	235.72	146.368	311.69	270.27	248.77
147.067	275.09	252.34	270.32	147.067	251.21	231.15	250.67	147.067	218.53	263.93	283.73	147.067	388.03	380.57	383.95	147.07	416.17	346.96	399.05	147.069	366.54	411.83	420.45	147.07	259.06	247.33	304.37	311.76	147.07	354.24	284.74	287.9	147.068	348.56	326.63	282.56	147.066	245.89	229.36	287.72	323.42	147.069	318.43	240.7	235.77	147.069	311.72	270.95	249.2
147.769	276.16	249.9	270.38	147.769	251.32	230.55	250.73	147.769	218.38	262.8	284.32	147.767	389.13	381.08	384.49	147.768	416.33	347.96	399.73	147.767	367.12	411.42	421.65	147.768	259.04	240.96	301.8	312.29	147.77	354.1	282.07	288.27	147.768	348.05	327.2	284.2	147.767	247.1	228.96	287.26	325.07	147.769	318.36	240.73	234.99	147.767	312.35	270.12	249.1
148.469	276.1	242.53	265.5	148.467	251.55	229.18	251.73	148.469	218.39	262.36	283.99	148.469	389.13	382.57	384.76	148.469	416.8	347.99	398.66	148.469	367.38	411.23	421.88	148.468	258.96	241.02	302.91	311.57	148.469	353.8	278.99	288.08	148.468	348.57	327.33	285.32	148.467	242.81	229.33	288.13	323.11	148.469	318.16	240.74	234.83	148.467	312.27	269.63	248.72
149.169	277.23	242.32	265.71	149.169	252.03	228.29	251.38	149.169	218.4	262.44	284.37	149.17	390.09	383.55	393.7	149.171	417.53	348.11	398.13	149.168	366.85	418.28	421.29	149.17	259.07	242.34	300.48	313.6	149.171	354.19	277.2	287.89	149.169	348.31	326.56	285.9	149.167	239.64	230.12	288.56	321.39	149.169	323.28	240.4	234.66	149.17	312.24	269.36	249.11
149.869	275.82	244.73	264.09	149.869	251.69	228.39	251.99	149.868	218.49	261.58	284.71	149.868	391.05	383.81	390.94	149.869	418.05	347.02	398.45	149.869	367.61	415.03	421.83	149.87	259.53	242.83	299.88	313.32	149.869	353.83	277.06	288.25	149.869	348.71	326.55	286.79	149.868	240.85	230.28	288.14	321.31	149.87	326.53	240.76	234.69	149.868	312.49	269.26	249.87
150.569	276.52	243.01	262.27	150.567	253.68	228.69	253.49	150.568	218.62	261.96	285	150.568	391.57	384.93	394.15	150.569	417.07	360.39	398.83	150.567	366.55	419.79	422.95	150.57	260.24	242.93	299.01	313.47	150.567	353.9	276.09	289.07	150.569	349.28	327.43	286.95	150.567	241.34	229.99	287.82	319.11	150.57	320.89	241	234.92	150.569	313.14	268.37	248.72
151.269	276.02	242.67	261.59	151.268	261.82	227.76	256.27	151.269	218.63	262.13	283.95	151.269	391.66	384.78	385.8	151.269	418.2	348.53	399.65	151.267	366.81	414.77	424.76	151.269	260.07	244.11	299	312.89	151.269	353.51	275.97	300.2	151.268	349.77	327.97	287.18	151.267	241.49	230.51	288.24	315.69	151.269	314.28	241.22	235	151.268	312.5	268.72	249.07
151.969	276.73	242.2	261.24	151.968	258.86	226.62	252.34	151.968	218.46	262.52	284.54	151.968	392.36	388.31	386.08	151.969	418.59	341.96	398.96	151.968	366.58	413.89	422.62	151.969	260.88	244.78	298.46	312.67	151.969	354.5	275.04	298.28	151.97	349.02	327.65	287.1	151.969	241.29	230.84	291.54	319.08	151.967	315.53	240.33	235.07	151.97	317.38	269.05	249.26
152.669	278.51	242.02	261.8	152.668	254.67	227.01	249.38	152.668	218.78	268.57	284.78	152.669	392.52	390.62	389.58	152.669	418.26	344.24	399.97	152.669	367.01	413.43	423.44	152.671	263.92	245.03	298.24	312.33	152.669	354.4	274.97	292.74	152.668	348.52	331.37	287.59	152.667	241.48	230.38	293.71	317.83	152.67	317.06	240.61	235.1	152.67	318.9	268.66	250.61
153.369	282.19	242.63	261.44	153.368	246.75	227.72	250.16	153.368	218.34	270.08	284.9	153.369	394.05	381.13	386.02	153.369	418.98	346.26	398.45	153.368	366.58	412.09	421.56	153.37	266.33	247	298.77	313.42	153.369	354.5	274.91	289.82	153.368	357.01	334.74	287.68	153.369	241.88	230.78	297	318.06	153.369	317.14	240.76	234.91	153.368	314.61	269.23	250.36
154.069	284.09	242.32	260.72	154.068	245.46	228.66	250.12	154.068	218.58	264.95	284.73	154.068	394.6	382.36	385.13	154.069	419.51	346.8	398	154.069	366.21	410.76	422.8	154.07	261.82	250.14	298.02	312.44	154.068	354.16	274.86	289.45	154.069	362.1	330.78	288.42	154.068	242.48	231.09	295.31	317.98	154.068	317.55	240.89	235.66	154.07	314.6	269.7	249.38
154.767	279.79	242.66	261.26	154.768	245.58	228.54	250.34	154.768	218.22	262.87	285	154.768	395.3	382.92	386.17	154.769	419.2	347.1	399.14	154.769	366.8	410.47	421.24	154.769	258.57	246.52	298.23	312.09	154.768	354.38	274.26	289.36	154.769	356.16	330.1	288.53	154.768	242.85	231.28	294.34	317.53	154.768	317.71	247.63	235.15	154.77	312.74	270.32	250.79
155.467	276.81	243.06	260.42	155.468	246.03	228.02	250.98	155.469	218.41	261.81	284.97	155.469	395.9	384.87	387.04	155.469	419.61	347.73	398.82	155.468	366.8	409.47	421.34	155.469	257.89	241.69	298.36	313.05	155.468	354.28	274.38	288.67	155.468	352.02	327.4	287.82	155.468	243.36	231.55	292.6	317.08	155.468	317.97	244.84	235.37	155.469	311.41	269.17	251.86
156.168	275.23	243.35	260.25	156.168	246.57	228.56	251.49	156.167	218.21	261.64	285.43	156.169	396.59	386.97	387.6	156.169	419.51	356.16	399.02	156.17	367.51	409.92	420.76	156.168	258.51	242.76	298.38	312.83	156.168	353.66	275.28	288.54	156.168	347.75	326.49	288.62	156.168	243.9	231.69	291.59	317.65	156.168	317.41	241.18	235.35	156.169	310.95	275.31	251.71
156.868	271.78	243.61	260.39	156.868	246.42	228.41	251.17	156.868	218.35	261.19	284.97	156.869	397.64	387.36	400.28	156.868	420.12	351.48	397.67	156.869	367.4	409.71	421.84	156.868	258.28	244.1	298.51	314.7	156.868	353.67	275.05	287.12	156.87	344.49	326.6	289.04	156.868	243.85	231.16	290.96	316.91	156.868	317.48	240.08	234.95	156.869	310.43	278.25	250.52
157.568	269.55	243.95	260.42	157.57	247.26	227.66	251.65	157.567	218.23	261.02	285.39	157.569	398.36	388.02	394.79	157.568	420.23	344.19	397.69	157.568	367.53	410.11	420.82	157.57	258.59	243.96	299.19	324.73	157.568	354.27	275.26	287.34	157.568	343.38	325.83	288.74	157.568	244.13	231.85	290.6	317.6	157.568	317.77	238.5	235.12	157.569	311.7	277.87	249.94
158.268	271.39	251.36	259.32	158.27	247.79	228.09	252.58	158.27	218.06	260.61	285.36	158.269	398.84	388.61	390.62	158.268	421.13	350.51	397.59	158.269	367.76	410.44	422.08	158.268	258.83	244.51	298.04	325.2	158.268	354.1	275.23	287.55	158.268	343.79	325.18	288.94	158.268	244.2	232.09	291.01	317.97	158.268	317.75	238.65	235.56	158.271	311.98	276.09	249.01
158.968	273.46	253.5	260.22	158.968	248.16	228.46	252.63	158.968	218.35	261.82	285.67	158.969	399.24	388.96	397.17	158.969	421.84	341.03	398.04	158.969	368.19	411.06	421.89	158.968	260.17	245.06	299.46	324.37	158.969	354.29	275.3	287.4	158.969	343.39	325.98	289.35	158.968	244.44	232.06	291.85	318.27	158.969	318.17	238.72	235.4	158.971	311.11	272.81	250.16
159.668	274.12	245.85	259.67	159.67	248.72	228.8	252.86	159.668	218.07	261.6	285.56	159.669	399.59	389.64	394.39	159.669	421.18	346.01	398.32	159.669	367.8	410.49	421.76	159.668	260.65	248.95	299.87	319.19	159.668	365.44	274.94	287.02	159.669	344.86	326.16	289.96	159.668	244.78	232.21	291.02	318.33	159.669	318.09	239.21	237.2	159.669	311.46	271.01	250.74
160.367	275.62	242.99	260.25	160.37	248.64	228.16	252.87	160.367	218.11	262.17	285.35	160.369	407.63	390.5	398.38	160.367	420.81	343.37	398.28	160.369	368.12	415.37	421.58	160.368	261.32	251.5	307.28	317.12	160.368	367.81	274.93	287.99	160.371	345.25	326.48	289.72	160.368	244.64	232.57	291.72	321.56	160.369	317.96	240.06	246.04	160.369	311.61	271.43	250.43
161.069	276.26	242.84	259.81	161.068	249.29	228.41	252.97	161.067	218.47	261.96	285.12	161.07	409.48	391.2	396	161.069	421.23	344.34	399.09	161.068	367.97	417.12	421.07	161.068	261.22	244.52	307.41	316.72	161.068	367.37	274.63	286.96	161.069	345.88	326.71	289.05	161.068	246.38	232.26	292.17	323.21	161.069	318.11	240.71	242.82	161.069	311.94	271.43	251.71
161.768	276.97	243.05	259.7	161.768	249.29	228.25	252.34	161.768	218.51	261.89	284.27	161.77	403.82	390.39	395.68	161.768	422.42	344.98	399.74	161.768	367.7	418.75	422.45	161.769	261.45	242.98	305.16	316.27	161.768	356.6	275.49	287.81	161.769	346.4	326.64	288.91	161.77	251.12	232.37	292.34	323.9	161.769	317.89	240.92	236.27	161.767	311.75	271.69	251.42
162.468	277.39	243.02	260.07	162.467	249.25	227.92	253.03	162.468	218.09	262.1	284.56	162.47	401.56	390.07	393.99	162.469	421.15	358.01	398.67	162.469	368.39	416.46	421.39	162.469	261.48	244.45	303.2	316.19	162.468	350.33	275.84	288.22	162.467	346.73	326.74	289.42	162.468	246.33	232.9	292.12	321.7	162.469	318.57	240.55	232.8	162.468	318.26	271.51	250.69
163.168	277.94	243.74	260.05	163.168	249.46	228.87	252.95	163.168	218.03	261.25	284.28	163.168	397.1	390.5	395.61	163.169	422.64	350.11	399.33	163.169	368.15	413.7	423.1	163.169	261.43	244.96	302.66	316.96	163.168	350.96	276.82	287.82	163.167	347.59	326.78	289.62	163.168	240.48	233.06	291.77	321.21	163.169	318.6	240.93	232.5	163.168	317.2	270.53	250.91
163.867	277.38	243.32	259.83	163.868	249.78	229.07	253.56	163.869	218.31	261.37	284.63	163.87	397.28	391.69	392.05	163.869	434.4	344.52	399.5	163.869	368.02	412.21	426.18	163.87	262.07	245.16	301.59	316.67	163.868	350.05	277	287.58	163.867	347.81	326.79	289.31	163.868	242.53	232.61	292.29	321.04	163.87	318.51	240.89	232.02	163.868	313.6	269.53	249.86
164.567	277.56	245.76	260.2	164.568	249.56	228.48	253.31	164.569	218.29	262.9	285.21	164.568	397.34	392.52	399.33	164.567	437.12	344.36	399.35	164.569	367.95	410.37	426.88	164.568	261.98	245.73	300.82	316.25	164.57	350.73	276.32	287.29	164.568	349.03	327.37	290.62	164.569	243.42	233.52	292.26	320.75	164.57	318.9	240.35	232.78	164.569	312.26	269.14	250.45
165.268	277.81	248.88	260.36	165.268	249.79	227.98	253.15	165.269	218.39	268.26	285.58	165.268	399.27	407.88	395.42	165.269	427.51	346.62	400.4	165.269	367.92	410.8	423.92	165.269	262.51	246.57	300.81	315.9	165.268	350.44	277.09	287.96	165.271	348.96	327.59	290.06	165.269	243.33	233.11	291.96	320.86	165.269	318.69	241.1	232.59	165.269	310.54	268.73	250.64
165.968	277.49	243.59	259.48	165.969	249.16	228.47	253.67	165.97	218.15	267.63	285.56	165.969	400.28	402.82	393.86	165.968	419.97	342.64	401.83	165.969	367.94	410.07	420.14	165.969	267.57	246.93	300.24	316.26	165.968	351.44	277.49	287.87	165.968	348.81	327.18	290.13	165.968	243.1	234.2	292.72	320.03	165.969	319.01	240.41	232.62	165.969	311.36	269.59	251.26
166.667	277.71	243.04	260.04	166.667	249.66	228.85	253.3	166.668	218.34	264.26	285.94	166.669	401.94	391.28	395.65	166.668	417.18	345.37	401.09	166.668	368.84	416.81	419.81	166.668	267.2	247.65	299.92	315.23	166.669	351.55	277.45	287.52	166.668	348.61	331.77	290.55	166.668	244.4	234.13	292.25	320.52	166.668	319.2	241.26	233.11	166.668	312.88	268.92	250.39
167.367	278.08	242.89	259.75	167.369	250.13	229.23	255.14	167.369	218.34	263.36	285.59	167.369	402.25	389.95	396.05	167.37	416.98	346.78	399.26	167.37	368.05	414.83	419.91	167.37	264.09	247.54	299.9	316.24	167.369	351.56	277.34	288.22	167.368	348.55	330.93	291.41	167.368	244.4	234.23	292.99	320.77	167.37	319.23	240.31	233.24	167.369	311.67	269.39	250.73
168.067	277.91	243.03	262.64	168.069	250.25	229.43	255.02	168.068	218.52	262.85	285.75	168.069	403.31	389.75	397.45	168.068	415.72	345.09	399.33	168.07	368.78	419.09	420.2	168.068	260.63	247.34	300.09	315.52	168.07	351.54	277.88	288.01	168.068	348.19	331.13	291.22	168.068	244.92	234.51	293.17	320.96	168.068	321.07	240.62	233.71	168.069	311.43	269.21	249.98
168.769	277.87	243.9	270.12	168.77	250.51	229.06	253.19	168.77	217.93	262.6	286.24	168.769	404.25	389.31	397.4	168.768	416.48	345.74	398.57	168.768	368.4	416.59	420.37	168.77	258.02	252.73	299.33	316.29	168.769	351.99	278.47	288.14	168.769	347.47	329.89	291.34	168.768	245.66	233.98	294.49	320.56	168.77	327.89	240.43	233.78	168.769	311.55	269.79	250.24
169.469	277.99	244.31	273.44	169.468	251.07	228.24	250.21	169.468	218.33	263	286.09	169.469	405.52	392.05	397.84	169.469	417.05	345.26	398.76	169.468	367.07	413.95	421.36	169.47	259.54	252.75	300.31	316.18	169.47	351.99	277.32	288.71	169.468	347.68	328.87	289.73	169.468	245.61	234.75	299.84	321.55	169.468	326.09	240.67	234.49	169.469	312.15	269.55	249.93
170.169	280.6	245.23	266.76	170.168	250.7	228.23	249.09	170.17	218.23	261.35	285.71	170.168	405.91	392.41	398.54	170.169	417.7	340.12	397.93	170.168	366.54	412.9	421.47	170.17	259.75	246.43	300.04	316.32	170.168	352.09	280.7	288.71	170.168	347.77	327.83	289.49	170.167	246.1	234.65	303.73	331.91	170.17	317.92	240.83	234.42	170.169	312.26	268.86	250.63
170.868	281.81	247.21	264.61	170.87	250.72	227.39	249.15	170.869	218.16	261.21	285.81	170.868	406.72	394.06	399.32	170.868	417.32	343.66	397.57	170.868	368.55	411.06	420.19	170.869	259.76	243.17	300.69	316.05	170.868	352.09	283.51	288.25	170.867	347.89	326.51	289.9	170.867	254.33	234.98	302.32	330.86	170.868	316.05	241.07	234.89	170.869	312.26	269.47	251.12
171.568	278.46	245.42	263.04	171.568	250.63	228.02	249.06	171.569	218.52	262.55	285.48	171.569	407.59	399.4	399.06	171.57	417.42	345.37	398.09	171.569	372.59	411.09	421.11	171.569	260.39	243.94	300.78	317.26	171.568	351.92	279.07	288.71	171.568	348.19	326.2	289.55	171.568	250.83	235.1	299.76	327.16	171.57	318.64	241.39	235.1	171.569	312.23	268.65	251.17
172.267	279.81	243.87	262.45	172.27	250.82	228.29	249.55	172.268	218.45	262.42	284.98	172.269	408.41	399.56	399.84	172.267	418.38	344.29	398	172.269	369.2	410.98	421.21	172.268	261.06	244.43	300.78	316.6	172.268	352.57	279.66	288.37	172.269	347.76	326.22	289.58	172.268	243.92	234.75	295.78	325.81	172.268	319.07	241.1	234.63	172.269	311.78	272.52	251.03
172.967	273.62	243.64	262.3	172.969	249.83	227.95	250.35	172.969	218.41	268.33	284.38	172.969	408.84	392.27	400.15	172.967	419.11	345.08	398.69	172.967	359.35	411.64	421.12	172.968	261.56	244.12	302.52	316.93	172.968	353.22	276.97	287.9	172.969	348.08	325.79	290.01	172.968	243.79	234.3	297.62	325.53	172.968	318.84	241.62	235.24	172.968	312.81	277.8	251.01
173.669	272.7	243.21	262.77	173.669	250.06	228.81	250.84	173.668	218.64	270.07	284.26	173.669	409.52	395.22	404.15	173.667	418.6	346.35	398.25	173.668	360	410.7	428.35	173.67	262.47	244.73	309.43	316.72	173.668	352.92	276.47	288.35	173.67	347.89	326.15	290.04	173.668	245.76	235	297.13	325.13	173.67	318.96	241.24	235.11	173.67	312.67	277.71	250.4
174.367	271.96	243.57	261.17	174.369	249.79	226.96	250.53	174.368	218.23	266.28	284.58	174.369	409.68	396.55	412.17	174.367	419.7	346.45	398.92	174.367	364.03	417.3	426.23	174.368	262.26	245.81	312.14	317.69	174.368	352.73	275.91	288.61	174.364	348.15	326.95	290.1	174.368	245.02	235.41	295.75	324.82	174.368	318.98	241.08	235.35	174.368	313.23	277.66	250.45
175.069	272.81	244.12	260.26	175.069	250.06	227.46	251.96	175.068	218.3	263.9	284.68	175.069	409.74	401.71	407.37	175.067	419.87	348.13	409.19	175.067	364.69	419.2	421.86	175.07	263.35	246.36	307.42	317.07	175.069	352.51	276.1	287.24	175.069	346.96	326.8	290.33	175.068	245.43	235.45	295.35	324.17	175.068	319.02	241.08	235.16	175.068	313.85	275.95	252.37
175.768	273.68	244.69	263.33	175.769	249.64	227.65	251.87	175.768	218.1	262.36	285	175.768	411.58	401.88	400.62	175.767	420.72	355.11	405.14	175.769	364.75	419.09	419.79	175.768	263.42	247.18	307.07	317.41	175.767	353.05	276.62	288.22	175.769	346.75	327.15	289.67	175.767	245.54	235.64	294.66	323.83	175.769	318.83	241.22	235.19	175.768	314.48	271.99	251.11
176.468	272.67	244.87	260.94	176.469	250.05	227.1	252.75	176.469	218.32	262.8	285.12	176.469	412.25	401.23	402.98	176.468	420.94	350.6	403.35	176.467	364.66	415.18	418.76	176.468	263.49	246.99	305.46	317.71	176.469	352.52	276.51	288.05	176.47	348.7	327.25	289.51	176.467	246.41	235.39	294.25	323.39	176.468	319.42	240.25	235.17	176.469	313.47	271.5	250.75
177.166	273.5	245.34	260.28	177.169	249.98	226.88	252.76	177.169	217.97	262.22	285.28	177.169	412.44	399.7	400.05	177.168	421.38	346.89	403.5	177.169	365.24	413.68	419.18	177.171	263.48	247.66	304.63	316.72	177.169	353.01	276.12	288.28	177.17	347.94	327.49	290.6	177.168	246.98	235.72	294.37	323.8	177.169	319.11	240.6	235.55	177.168	314.1	271.21	258.36
177.867	273.23	245.07	260.04	177.869	251.06	226.26	252.12	177.869	218.05	262.41	285.31	177.871	414.29	401.66	398.48	177.868	421.89	339.72	401.62	177.869	366.08	412.72	420.33	177.869	264.03	247.92	303.65	315.98	177.867	353.42	275.74	288.32	177.87	347.01	327.55	290.33	177.869	247.05	236.02	295.3	324.2	177.869	319.89	240.15	235.9	177.869	313.22	271.11	258.67
178.567	274.22	252.71	259.64	178.57	251.74	226.14	251.83	178.567	218.17	261.59	284.81	178.569	421.77	397.13	404.37	178.568	421.81	343.52	399.04	178.569	365.86	411.67	419.82	178.57	264.02	248.23	303.39	317.26	178.568	352.69	282.31	294.47	178.568	347.13	327.26	289.87	178.567	247.91	236.38	295.23	323.17	178.569	319.14	240.41	235.75	178.569	312.88	271.99	245.29
179.269	274.22	254.1	260.53	179.269	251.26	226.76	251.92	179.269	218.25	261.15	284.83	179.271	417.79	398.03	401.42	179.269	422.99	340.66	398.11	179.268	365.81	411.22	420.08	179.268	263.68	248.51	302.62	316.88	179.268	353.28	283.69	299.32	179.27	347.49	327.14	290.3	179.267	248.8	235.66	295.5	331.67	179.269	320.11	240.73	236.27	179.269	313.77	270.72	241.76
179.967	275.08	245.98	265.08	179.969	250.78	225.94	251.93	179.968	218.2	261.79	285.11	179.969	414.7	401.7	402.71	179.968	421.52	338.45	399.14	179.97	365.88	411.9	420.26	179.968	264.19	248.44	302.19	316.96	179.969	353.19	277.36	292.72	179.97	347.79	327.11	290.81	179.967	248.63	236.08	296.56	329.16	179.969	319.57	239.96	235.97	179.969	315.26	270.68	244.02
180.667	276.22	244.25	267.15	180.669	250.39	239.36	252.25	180.668	218.44	262.16	284.64	180.669	413.06	403.65	403.08	180.669	421.87	344.16	397.43	180.668	365.81	411.22	422.24	180.668	264.62	248.47	301.95	316.64	180.668	353.26	276.91	289.14	180.67	347.86	327.52	296.7	180.668	248.55	235.93	295.91	328.27	180.669	320.62	240.17	235.88	180.669	318	270.36	242.78
181.367	276.74	243.65	263.71	181.369	251.02	247.11	252.25	181.367	218.05	261.61	284.34	181.369	411.75	403.87	402.22	181.368	422.91	344.79	397.76	181.368	366.51	413.58	421.85	181.368	264.82	248.63	303.26	318.07	181.368	352.48	276.04	289.68	181.37	350.98	327.25	296.26	181.368	249.05	235.66	296.89	328.49	181.368	320.36	240.45	245.33	181.369	317.64	270.08	243.81
182.067	276.75	244.86	262.3	182.069	250.5	241.52	252.11	182.069	218.04	262.17	284.38	182.068	410.75	411.96	403.26	182.07	422.67	345.57	397.12	182.07	366.26	417.07	422.26	182.068	265.06	254.58	302.77	317.56	182.07	352.56	274.3	287.44	182.069	358.89	327.2	288.63	182.067	249.64	236.37	295.92	326.42	182.068	320.33	240.97	241.29	182.069	313.29	270.12	245.48
182.768	276.99	245.78	261.24	182.769	251.16	237.5	253.5	182.768	218.14	262.43	282.91	182.77	411.5	414.77	408.54	182.769	423.06	346.16	397.04	182.77	366.24	420.93	422.69	182.767	264.52	252.34	303.18	324.39	182.77	352.87	274.88	287.65	182.771	354.27	328.22	282.55	182.768	248.95	235.98	295.48	325.1	182.768	320.06	240.62	236.21	182.769	313.08	271.09	246.71
183.468	276.71	245.53	260.5	183.469	250.9	232.86	255.68	183.47	218.14	262.48	282.87	183.468	412.37	402.47	418.37	183.47	422.76	345.93	397.08	183.469	366.7	417.09	422.12	183.469	264.77	246.92	303.98	331.74	183.468	352.88	275.15	287.39	183.469	346.44	328.06	281.69	183.47	249.32	235.84	299.24	324.48	183.468	320.03	240.39	233.69	183.468	312.89	274.13	248.69
184.168	277.24	243.92	260.35	184.169	250.57	230.24	251.54	184.168	218.39	262.4	282.88	184.17	413.77	403.46	411.34	184.17	422.54	344.36	396.82	184.169	366.4	414.07	421.95	184.167	265.43	243.58	303.51	328.5	184.168	353.06	274.53	288.26	184.169	343.59	327.91	281.87	184.168	248.88	235.73	300.24	324.53	184.168	320.5	247.96	234.39	184.168	311.3	275.61	249.4
184.868	277.38	243.98	260.78	184.868	251.2	229.18	249.41	184.868	218.66	262.4	283.69	184.868	413.93	405.67	403.79	184.87	423.15	345.47	397.71	184.87	366.51	413.04	421.98	184.869	265.26	243.83	303.94	324.82	184.87	353.55	275.31	287.56	184.869	341.74	328.2	282.42	184.868	249.3	236.12	301.9	324.76	184.868	320.19	248.2	233.8	184.868	312.27	274.21	250.03
185.568	278.42	244.93	260.44	185.568	251.28	227.95	248.49	185.568	218.46	262.55	284.07	185.57	415.39	410.09	403.53	185.57	421.44	346.55	397.25	185.568	367.18	411.35	421.64	185.569	268.78	245.22	304.22	327.99	185.569	353.98	275.95	287.24	185.569	342.78	328.1	283.45	185.567	250.98	236.27	299.76	324.89	185.568	320.34	243.55	233.64	185.568	312.38	272.34	250.58
186.267	276.89	245.37	260.38	186.268	251.98	228.26	248.61	186.268	218.5	261.88	284.58	186.268	416.12	405.98	404.56	186.27	421.06	345.68	397.18	186.27	366.75	411.9	422.39	186.267	269.01	245.4	306.41	321.22	186.269	352.91	275.72	287.16	186.268	344.06	327.75	284.89	186.269	253.9	236.59	298.85	324.29	186.269	321.09	238.99	234.02	186.268	312.42	271.91	250.92
186.968	277.59	244.19	259.64	186.968	251.74	227.78	249.05	186.968	218.41	262.39	284.56	186.967	416.75	404.5	404.62	186.969	421.77	346.03	396.93	186.97	366.9	410.34	423.61	186.969	265.04	245.68	310.27	318.81	186.968	354	275.61	286.98	186.969	344.99	331.73	285.59	186.968	251.36	236.66	297.99	326.09	186.97	320.59	241.01	233.43	186.967	312.33	271.96	250.04
187.667	277.44	245.07	260.28	187.668	251.64	227.57	249.44	187.668	218.23	262.27	284.39	187.669	417.44	406.12	405.7	187.669	422.45	345.92	396.7	187.668	367.59	414.12	423.5	187.669	259.36	246.99	307.42	319.74	187.668	353.3	275.77	287.31	187.668	346.41	333.88	285.95	187.667	243.64	236.52	297.53	326.5	187.669	320.46	238.92	234.31	187.668	313.11	270.84	250.64
188.368	277.19	244.51	260.15	188.369	251.12	229.95	249.89	188.368	218.67	263.54	284.52	188.368	418.06	403.97	406.76	188.368	423.48	346.32	396.35	188.368	368.02	413.53	423.2	188.368	261.59	247.82	307.57	321.24	188.368	353.82	275.73	287	188.37	345.52	331.66	285.99	188.369	243.32	236.49	297.86	326.25	188.369	321.01	238.14	234.64	188.369	313.39	269.98	250.93
189.067	277.08	245.83	259.85	189.069	251.4	243.63	250.46	189.068	218.53	267.74	284.29	189.068	418.27	404.11	407.9	189.07	424.06	364.33	396.53	189.069	367.89	414.81	422.8	189.069	261.16	248	306.12	320.81	189.069	352.94	275.84	287.11	189.068	345.77	330.73	286.6	189.067	245.77	236.84	297.37	326.18	189.069	320.72	239.13	234.23	189.067	313.45	271.12	250.56
189.769	277.4	246.92	260.07	189.769	250.64	243.71	250.88	189.769	218.14	268.26	284.06	189.768	418.52	405.36	408.68	189.77	423.26	349.25	396.49	189.769	367.18	415.46	431.44	189.767	261.84	248.03	304.96	320.56	189.769	353.39	276.09	287.16	189.768	346.15	329.74	287.44	189.767	245.31	236.71	297.41	324.81	189.769	320.6	239.31	234.31	189.769	316.36	271.11	250.8
190.469	282.09	245.95	259.88	190.469	250.91	237.24	251.54	190.469	217.86	263.06	284.15	190.468	419.33	406.25	408.7	190.47	422.91	347.65	396.55	190.468	367.17	414.55	426.96	190.469	262.61	248.72	304.14	320.68	190.469	353.43	275.47	286.75	190.47	345.97	328.58	287.5	190.467	245.72	236.49	297.88	326.08	190.469	320.35	245.02	234.8	190.467	316.6	270.62	250.8
191.169	283.98	247.12	259.97	191.169	258.52	233.33	251.41	191.169	217.92	261.43	284.57	191.168	420.17	407.25	408.64	191.17	422.88	343.52	397.22	191.168	367.08	413.72	423.76	191.169	263.24	249.57	303.79	320.7	191.169	353.45	276.92	287.91	191.17	346.29	328.18	287.83	191.169	246.95	237.07	297.47	326.36	191.169	320.24	246.33	234.65	191.169	313.37	269.58	251.09
191.868	280.13	245.18	260.15	191.869	262.7	229.07	252.44	191.869	218.16	261.19	284.63	191.868	421.03	418.68	409.34	191.87	423.71	342.38	396.81	191.868	367.25	411.14	423.6	191.869	263.47	254.68	304.31	320.1	191.867	353.76	281.51	287.49	191.87	345.57	326.74	288.07	191.867	247.35	236.9	298.01	325.61	191.868	320.34	243.1	234.96	191.867	313.12	270.42	251.83
192.568	275.45	244.71	260.27	192.569	258.38	228.08	252.48	192.567	217.99	261.5	284.27	192.569	420.54	415.4	409.47	192.565	424.94	342.31	396.34	192.568	367.41	411.6	419.76	192.567	263.6	253.43	303.77	320.19	192.567	354.12	280.3	287.75	192.568	346.32	326.3	287.54	192.567	248.14	236.96	297.77	326.12	192.569	320.03	242.93	235.15	192.568	312.86	270.3	251.26
193.269	276.73	245.24	259.54	193.269	250.62	228.07	251.65	193.268	218.1	260.84	284.47	193.268	421.2	409.2	409.91	193.268	423.63	346.55	397.07	193.27	366.94	410.55	419.99	193.267	264	248.18	303.72	320.57	193.267	354.02	278.92	287.98	193.269	346	326.29	288.36	193.267	248.14	237.18	297.26	325.51	193.268	320.24	239.19	235.32	193.268	311.49	270.04	251.49
193.968	274.85	245.4	261.21	193.969	245.79	227.93	251.84	193.967	218.41	261.35	284.19	193.969	421.58	408.74	409.84	193.97	423.7	347.19	397.23	193.967	366.93	410.33	419.75	193.969	264.42	244.41	303.82	320.53	193.967	354.37	276.05	287.9	193.969	345.98	326.15	288.43	193.968	248.84	237.16	297.84	326.44	193.968	320.81	238.14	234.87	193.967	313.38	269.65	253.41
194.668	273.66	249.27	270.12	194.669	245.36	227.97	252.49	194.668	218.36	261.34	283.94	194.669	421.6	408.09	409.58	194.669	425.44	348.07	396.45	194.669	367.56	417.44	418.88	194.669	267.66	245.16	304.55	319.91	194.669	354.81	274.3	287.89	194.67	346.36	327.1	288.4	194.668	249.13	236.96	297.79	327.35	194.668	320.44	239.48	234.75	194.667	312.72	271.07	253.01
195.368	273.9	254.19	273.3	195.369	245.79	226.82	252.19	195.368	218.08	265.68	283.88	195.369	430.92	406.82	410.61	195.369	423.37	348.78	397.01	195.368	367.53	416.95	419.9	195.37	268.11	246.08	304.05	319.68	195.369	353.8	273.78	288.24	195.37	347.03	326.47	288.45	195.368	249.71	237.19	299.41	326.76	195.37	320.09	239.61	234.85	195.367	312.69	279.3	252.18
196.068	272.2	249.09	272.98	196.069	246.57	227.16	252.07	196.068	218	268.77	283.73	196.069	428.15	410.09	412.11	196.069	424.31	348.62	397.68	196.068	367.79	419.62	419.69	196.071	265.6	246.62	305.18	320.31	196.069	354.59	273.95	287.98	196.07	346.64	327.54	288.38	196.068	250.11	237.21	302.42	326.6	196.069	321.03	241.06	236.11	196.069	313.06	280.4	253.63
196.766	273.17	245.92	272.1	196.769	246.56	227.11	252.04	196.768	217.8	268.5	289.44	196.769	423.87	414.08	410.35	196.769	424.51	337.65	398.82	196.768	367.7	415.48	419.96	196.771	261.66	246.88	304.21	320.76	196.767	354.6	273.58	288.6	196.77	346.66	327.15	288.88	196.768	249.84	237.4	305.99	325.84	196.768	319.86	241.41	235.88	196.769	313.79	280.34	252.29
197.468	272.21	244.53	269.23	197.469	246.67	226.91	252.03	197.469	218.31	263.87	290.27	197.469	421.61	411.06	412.34	197.469	421.06	342.86	398.57	197.468	367.39	412.79	420.76	197.469	262.56	248.04	305.18	319.69	197.468	354.72	274.86	288.34	197.469	346.91	328.06	288.83	197.467	249.92	237.54	304.62	325.95	197.468	320.27	239.75	236.2	197.469	313.18	274.92	253.22
198.166	273.81	244.46	264.27	198.169	247.56	226.79	251.99	198.167	217.96	262.71	285.62	198.169	424.02	410.24	426.87	198.169	435.02	346.3	398.55	198.168	366.62	411.87	421.11	198.17	262.34	249.07	306.09	319.94	198.168	354.05	274.91	288.81	198.17	347.18	327.9	288.44	198.168	249.51	237.1	302.69	326.47	198.167	320.27	250.22	235.69	198.167	314.14	273.02	254.63
198.868	275.4	244.16	263.38	198.87	248.15	227.14	252.7	198.868	218.04	261.67	279.2	198.869	422.45	409.69	425.98	198.869	430.93	344.89	400.08	198.868	368.11	411.01	420.77	198.869	263.21	249.59	311.76	319.99	198.868	354.43	274.29	288.46	198.87	347.25	327.64	288.72	198.868	249.84	237.26	301.78	324.88	198.868	320.65	247.61	235.21	198.87	314.74	272.65	254.9
199.567	276.02	244.63	262.6	199.568	247.93	227.19	251.94	199.568	217.97	261.78	278.9	199.569	422	410.05	413.83	199.569	424.42	342.91	405.63	199.567	367.49	410.06	422	199.57	262.8	249.76	310.35	320.34	199.568	354.33	275.18	289.1	199.57	346.68	327.29	289.08	199.568	250.11	237.36	303.9	325.63	199.568	320.37	240.95	235.26	199.569	314.61	272.24	254.87
200.269	275.77	245.24	262.19	200.269	248.46	227	254.15	200.268	217.89	261.63	278.35	200.269	421.53	410.49	412.03	200.269	422.46	345.04	409.86	200.267	367.82	410.42	422.04	200.27	263.48	249.29	308.79	319.63	200.268	354.12	276.33	288.97	200.27	346.85	327.77	288.97	200.268	257.78	236.83	301.21	325.64	200.27	320.52	239.95	235.57	200.269	313.99	271.77	253.2
200.967	276.15	245.38	261.65	200.969	248.64	226.84	254.65	200.968	217.92	261.41	278.96	200.969	422.18	410.72	417.08	200.969	418.33	347.22	402.99	200.97	367.46	415.52	422.11	200.97	263.94	249.76	307.3	321.52	200.969	366.65	283.33	288.77	200.97	347.32	327.74	288.62	200.968	253.57	237.54	299.45	325.84	200.968	320.28	238.79	235.36	200.969	314.79	271.74	252.17
201.67	277.02	247.81	261.07	201.669	248.55	226.72	249.9	201.668	218.24	262.02	279.78	201.669	422.67	410.95	416.31	201.669	417.2	346.36	403.19	201.668	367.68	418.28	421.83	201.668	264.08	250.05	307.21	320.75	201.667	368.11	280.74	288.59	201.668	346.52	330.61	289.24	201.668	244.97	241.55	298.74	326.02	201.67	320.02	239.33	235.76	201.669	314.97	271.61	251.75
202.365	277.11	249.57	260.96	202.371	248.85	227.19	248.97	202.368	218.76	262.96	280.27	202.369	422.18	410.96	412.86	202.369	416.24	346.49	399.07	202.368	368.09	416.89	420.9	202.37	264.95	250.71	305.85	320.86	202.369	366.85	276.21	288.99	202.37	346.64	330.69	288.38	202.368	244.1	244.66	298.87	325.58	202.369	319.78	239.94	234.69	202.369	314.66	271.7	251.71
203.068	276.1	248.33	260.78	203.069	249.03	226.77	248.08	203.068	218.21	266.75	280.27	203.069	422.44	411.94	412.09	203.069	415.83	347.4	401.18	203.068	368.33	413.13	421.64	203.07	264.66	249.92	304.56	320.58	203.067	355.17	274.05	289.49	203.068	346.66	330.49	290.13	203.067	245.42	241.71	298.74	326.72	203.069	320.58	240.33	235.28	203.07	315.07	272.05	251.51
203.769	277.24	246.9	260.89	203.771	249.18	226.53	247.3	203.769	217.97	267.45	281.02	203.769	422.96	423.25	414.22	203.768	414.56	345.73	400.77	203.77	368.48	411.98	420.86	203.769	264.83	256.03	305.33	320.52	203.77	349.36	274.83	289.16	203.77	345.96	330.72	288.75	203.768	245.35	237.91	299.4	326.25	203.768	319.53	240.81	235.59	203.768	315.33	272.1	252.76
204.469	277.95	245.67	260.74	204.467	249.08	226.89	247.87	204.469	218.08	263.08	280.95	204.468	423.57	424.93	420.86	204.469	415.04	348.14	399.35	204.468	368.37	410.85	421.47	204.469	265.09	254.02	305.16	321.26	204.468	349.02	275.22	288.42	204.47	346.36	328.32	288.63	204.467	246.67	235.07	299.08	329.36	204.469	320.35	241.48	235.3	204.467	315.34	271.9	254.31
205.17	277.22	245.44	260.12	205.169	257.76	226.31	248.49	205.168	217.69	262.39	281.29	205.168	423.87	416.64	420.45	205.169	415.99	357.62	397.36	205.168	368.63	411.78	422.49	205.17	265.15	249.8	305.16	321.19	205.17	348.8	274.85	289.2	205.168	346.68	328.75	288.93	205.167	246.83	234.87	299.72	329.71	205.169	320.41	240.96	235.28	205.167	315.08	271.99	252.54
205.866	277.58	245.58	260.61	205.868	258.98	227.22	249.48	205.868	217.76	261.74	281.61	205.868	424.43	409.42	416.63	205.868	417.27	346.56	396.89	205.869	368.3	410.56	421.78	205.868	265.32	244.35	304.64	320.75	205.868	348.47	274.5	288.68	205.864	346.58	326.95	291.89	205.868	247.38	234.81	298.85	330.44	205.869	320.53	241.66	235.61	205.868	314.84	272.44	251.89
206.568	277.58	247.2	260.19	206.568	254.22	228.11	249.36	206.568	218.16	261.57	282.7	206.568	425.09	408.58	414.1	206.568	418.04	343.34	396.93	206.567	368.69	410.02	422.21	206.57	265.83	245.43	304.86	320.04	206.569	348.81	274.47	299.75	206.569	346.23	326.64	295.64	206.567	247.58	235.22	298.94	327.05	206.569	321.56	242.04	236.04	206.568	314.74	272.06	250.61
207.268	277.87	250.3	260.36	207.268	248.08	230.77	249.71	207.268	217.77	261.38	283.34	207.268	424.52	409.77	413.38	207.268	418.42	348.82	396.61	207.269	368.41	413.56	421.05	207.27	265.53	246.56	304.68	320.11	207.269	348.87	274.29	295.08	207.269	345.75	327.21	296.68	207.27	248.33	235.26	299.37	326.61	207.269	329.34	242.35	235.85	207.268	314.31	271.84	250.73
207.964	278.18	248.19	260.04	207.968	245.81	245.94	250.24	207.968	217.58	261.69	283.2	207.968	425.33	415.47	413.54	207.97	417.81	343.39	397.09	207.969	368.05	417.41	421.3	207.968	266.23	247.01	304.42	319.87	207.968	348.62	274.89	289.62	207.968	345.63	326.84	288.2	207.969	248.14	234.76	298.72	327.41	207.968	331.22	242.67	235.29	207.968	315.14	272.88	251
208.67	278.13	245.72	260.32	208.668	245.32	243.16	250.87	208.668	217.73	260.78	283.12	208.668	432.38	417.31	414.32	208.67	417.64	341.06	396.21	208.668	368.24	417.43	422.51	208.669	266.67	246.76	304.4	320.46	208.665	349.72	275.28	290.48	208.668	345.89	327.11	281.35	208.667	248.51	234.64	298.75	327.12	208.669	321.55	242.11	235.42	208.668	315.12	275.79	251
209.365	282.46	245.74	260.45	209.368	246.3	240.11	250.55	209.369	217.45	260.83	284.11	209.368	431.18	413.45	415.15	209.369	418.9	343.09	396.86	209.368	368.09	415.64	422.8	209.369	266.51	248.44	304.04	319.77	209.369	349.52	274.84	289.22	209.369	345.96	326.82	282.36	209.367	249.2	235.25	298.77	326	209.369	316	241.42	234.94	209.368	315.55	280.93	254.22
210.065	280.94	246.26	260.17	210.068	246.75	233.11	250.67	210.069	217.88	261.37	284.28	210.067	425.24	413.37	414.82	210.069	418.79	345.28	396.04	210.069	366.26	414.03	421.84	210.07	266.86	249.15	304.41	320.41	210.069	350.85	275.19	290.23	210.069	345.82	326.51	280.82	210.067	249.36	235.17	298.09	325.91	210.068	315.66	242.14	235.3	210.069	318.79	280.31	260.62
210.768	275.81	245.48	260.1	210.768	246.73	230.3	251.2	210.768	217.46	261.74	284.09	210.767	423.36	413.18	416.28	210.768	419.28	346.35	395.62	210.769	367.02	412.86	422.67	210.77	266.37	249.38	305.49	320.51	210.769	350.47	274.98	289.93	210.769	345.7	326.96	282.13	210.768	249.47	235.41	298.97	326.9	210.768	316.53	241.34	235.79	210.769	320.26	275.38	258.59
211.47	276.61	245.9	260.46	211.468	247.42	229.53	251.21	211.468	217.78	261.57	284.1	211.469	422.33	412.37	424.41	211.47	418.99	346.6	395.55	211.468	366.84	411.19	422.48	211.47	267.08	249.68	305.71	320.23	211.469	351.97	275.54	289.98	211.469	345.45	327.28	283.92	211.468	249.63	235.85	300.84	326.71	211.468	317.44	241.89	235.95	211.468	316.84	274.65	245.11
212.17	277.14	245.67	260.73	212.167	247.65	229.34	251.22	212.168	218.17	261.29	284.25	212.169	422.42	412.9	421.99	212.17	419.63	346.36	396.53	212.168	367.81	410.82	421.99	212.168	266.94	250.09	312.6	320.17	212.169	351.97	276.48	289.92	212.169	346.08	327.24	284	212.168	250.45	235.32	303.31	325.41	212.17	318.07	242.05	235.59	212.169	314.82	272.98	241.82
212.87	275.27	246.52	260.44	212.869	248.62	228.41	251.75	212.868	217.49	262.01	284.1	212.869	425.85	413.88	415.88	212.868	419.98	353.27	397.05	212.869	367.69	409.97	422.05	212.87	267.16	250.37	312.69	320.23	212.869	352.54	275.7	290.08	212.869	345.71	327.33	284.72	212.868	256.3	235.42	303.89	325.76	212.868	318.33	242.24	235.82	212.869	315.07	273.27	244.54
213.568	271.94	246.52	259.53	213.569	248.66	227.91	252.18	213.568	217.56	261.37	284.24	213.569	427.59	414.1	419.96	213.568	419.05	348.13	397.74	213.568	367.77	410.14	421.22	213.57	267.57	250.43	309.82	319.65	213.569	351.55	276.42	289.55	213.569	344.69	327.8	284.81	213.567	253.12	235.97	303.7	331.16	213.568	319.13	242.1	235.34	213.569	311.54	272.22	244.79
214.268	273.22	247.01	261.07	214.269	248.84	227.56	252.05	214.267	217.59	261.05	284.38	214.269	425.36	414.69	419.03	214.268	419.73	342.46	398.36	214.268	367.48	409.71	421.84	214.27	267.09	250.51	308.31	320.56	214.27	364.71	280.77	290.07	214.269	346.49	327.24	285.32	214.267	248.08	242.04	304.53	340.04	214.27	319.19	242.88	235.3	214.269	313.02	271.99	245.67
214.968	273.28	246.25	269.31	214.968	248.95	227.67	251.68	214.967	217.27	260.76	284.3	214.97	424.81	414.66	415.37	214.969	418.52	348.42	398.98	214.968	367.41	410.01	422.32	214.97	267.43	251.08	307.95	320.46	214.968	365.55	283.47	290.23	214.97	346.72	329.01	286.09	214.968	244.59	243.84	303.13	338.73	214.968	319.08	243.04	235.51	214.969	313.53	271.84	246.37
215.669	272.52	246.73	272.03	215.668	249.12	227.66	252.18	215.668	217.85	259.91	284.19	215.67	424.44	416.2	421.78	215.668	429.17	342.02	398.73	215.667	367.94	410.9	428.15	215.669	267.83	250.76	306.39	321.19	215.668	357.71	277.46	290.63	215.668	345.4	328.23	286.98	215.668	245.82	238.68	302.1	340.72	215.668	318.68	242.58	235.72	215.669	312.64	271.87	247.85
216.369	272.96	250.44	264.97	216.369	249.89	227.62	252.1	216.368	217.68	261.39	284.26	216.368	424.56	415.62	418.87	216.369	432.81	342.07	398.6	216.369	367.79	409.15	429.64	216.37	271.87	251.34	306.7	320.88	216.368	352.04	277.15	290.16	216.368	344.51	329.81	287.22	216.368	246.57	234.8	300.83	333.63	216.369	319.63	242.49	235.42	216.368	311.2	272.15	248.64
217.069	272.89	250.96	263.85	217.069	249.86	239.42	252.38	217.067	217.78	260.92	284.03	217.068	425.25	415.02	415.71	217.067	425.99	345	397.62	217.068	368.07	410.33	424.8	217.07	269.43	251.15	306.28	322.19	217.069	350.03	275.37	290.81	217.068	345.46	328.38	287.19	217.068	247.19	235.93	300.53	333.31	217.068	319.06	242.29	235.89	217.068	311.71	271.74	247.75
217.767	273.35	247.38	266.37	217.769	250.07	243.49	255.53	217.767	217.74	261.01	284.2	217.77	425.45	415.14	416.05	217.769	422.05	346.94	397.81	217.768	368.37	409.39	422.91	217.768	265.04	251.25	305.92	321.13	217.769	351.02	274.16	290.08	217.768	345.09	327.59	287.54	217.768	247.5	234.72	300.3	332.2	217.769	319.87	241.88	236.24	217.77	312.12	272.72	252.99
218.467	273.77	247.05	268.13	218.469	249.92	240.61	257.29	218.469	217.33	261.01	284.1	218.468	425.99	415.28	416.96	218.469	417.66	351.29	398.38	218.468	367.92	408.33	422.15	218.47	259.53	251.2	305.97	322.22	218.47	351.23	273.05	291.07	218.469	344.84	327.16	288.11	218.468	247.27	235.23	300.23	328.71	218.469	319.65	242.27	235.87	218.47	313.12	271.81	244.68
219.167	274.59	246.18	265.05	219.169	250.27	236.35	253.98	219.167	217.35	261.17	284.76	219.17	426.07	415.19	416.31	219.169	417.01	347.41	398.28	219.168	368.21	409.16	420.6	219.17	261.42	251.61	305.3	322.13	219.168	350.78	273.34	290.92	219.169	345.49	326.89	287.6	219.169	248.18	235.78	299.77	329.49	219.169	319.55	242.18	236.19	219.168	312.36	273.08	243.38
219.864	275.07	245.33	264.36	219.869	250.52	232.35	248.53	219.867	217.57	260.62	283.98	219.868	426.05	426.12	416.66	219.867	416.91	342.98	398.39	219.868	367.77	409.23	419.53	219.869	262.81	256.37	305.75	321.92	219.868	351.26	273.59	290.67	219.869	344.73	326.98	287.78	219.868	248.62	235.1	299.18	329.37	219.869	319.51	242.59	236.29	219.868	312.46	279.92	245.72
220.563	275.89	245.25	263.66	220.569	250.02	229.57	248.03	220.567	217.19	261.04	283.96	220.57	426.06	429.77	416.94	220.569	417.02	343.59	398.2	220.57	368.75	419.04	420.04	220.568	263	256.58	305.48	321.71	220.568	351.64	274.26	291	220.57	344.76	326.21	288.03	220.569	255.17	234.69	299.04	328.77	220.568	319.77	242.06	236.76	220.568	312.96	279.85	244.83
221.264	276.7	245.48	263.02	221.268	250.54	229.1	247.76	221.268	217.38	261.23	283.86	221.268	426.44	415.14	417.49	221.268	416.11	344.32	397.73	221.268	370.11	418.54	419.18	221.269	263.15	252.79	305.42	321.12	221.27	352.07	274.35	290.33	221.27	344.68	326.41	287.11	221.269	250.88	235.18	299.29	328.23	221.27	319.93	244.68	235.94	221.269	312.82	280.15	246.57
221.964	276.6	245.77	263.13	221.968	250.69	228.55	247.89	221.967	217.61	260.38	284.09	221.97	426.98	414.28	416.89	221.968	416.48	345.74	397.68	221.969	375.03	419.09	420.31	221.968	264.88	245.19	305.75	320.54	221.969	351.65	276.48	290.01	221.968	344.75	325.65	287.2	221.969	245.45	235.56	299.34	327.93	221.97	320.63	249.35	235.85	221.968	313.55	276.42	247.2
222.666	277.06	246.06	261.76	222.669	250.36	228.56	248.26	222.668	217.12	259.84	284.53	222.67	426.88	416.63	417.89	222.668	416.34	346.68	398.11	222.669	364.33	414.69	420.17	222.67	265.14	245.54	305.31	320.98	222.669	351.82	281.84	289.58	222.668	344.51	326.4	287.34	222.669	245.59	235.94	299.62	326.8	222.67	320.33	245.84	236.58	222.67	313.07	273.56	248.47
223.368	277.39	246.15	261.57	223.369	250.38	228.2	248.86	223.368	217.64	259.52	284.85	223.37	427.19	414.35	418.24	223.368	419.6	345.79	397.99	223.369	360.2	412.65	421.57	223.368	265.36	246.85	305.79	321.11	223.368	351.46	281.18	289.84	223.37	344.96	326.72	287.62	223.369	246.3	236.43	298.61	327.21	223.369	320.25	242.71	236.09	223.37	313.08	273.68	249.86
224.064	276.95	246.38	261.27	224.069	250.43	228.53	249.72	224.068	217.41	268.2	284.57	224.07	430.04	420.81	417.87	224.07	416.59	345.52	398.76	224.069	362.01	409.7	421.93	224.068	266.31	247.23	305.88	320.75	224.069	352.23	277.61	289.92	224.07	344.55	326.24	288.95	224.07	247.57	235.97	299.43	327.59	224.069	320.14	242.36	244.98	224.07	313.95	272.82	251.34
224.764	276.86	246.33	261.18	224.769	250.64	240.68	249.86	224.769	217.21	270.42	284.06	224.77	432.89	418.4	419.88	224.768	416.33	346.5	399.06	224.769	363.51	408.72	421.57	224.77	266.09	248.53	308.36	321.72	224.768	352.46	274.76	289.11	224.769	344.31	325.78	288.39	224.768	247.41	236.39	299.08	328.02	224.77	320.18	241.57	242.96	224.77	313.32	271.89	251.39
225.468	276.87	246.31	261.4	225.467	250.79	241.53	250.46	225.468	217.2	268.71	284.04	225.471	432.77	415.37	419.28	225.468	417.96	355.14	410.42	225.466	364.15	407.98	421.38	225.468	270.62	249.49	313.63	322.22	225.468	352.24	274.58	294.54	225.468	345.49	325.65	287.94	225.469	247.12	236.91	299.18	327.8	225.469	320.57	239.69	237.26	225.468	312.6	274.3	251.87
226.168	276.24	246.28	260.66	226.167	251.12	237.15	250.55	226.168	217.37	264.05	284.17	226.171	427.6	415.66	418.22	226.168	418.89	355.18	405.53	226.166	365.21	408.44	421	226.169	268.16	250.11	310.67	326.77	226.168	364.07	273.97	298.17	226.168	344.97	326.31	288.29	226.168	247.46	236.97	298.98	327.33	226.168	320.07	240.5	234.89	226.167	313.05	272.67	252.05
226.868	276.85	254.04	260.1	226.869	249.98	231.7	251.3	226.868	217.43	262.3	284.56	226.869	422.9	415.99	428.44	226.869	419.79	346.2	404	226.87	365.62	407.58	421.15	226.868	265.92	250.01	309.71	334.55	226.868	365.47	273.02	290.88	226.868	345.02	326.19	288.46	226.868	247.91	237.49	298.86	327	226.868	320.54	239.86	233.28	226.868	313.41	273.45	251.91
227.568	281.29	252.59	259.54	227.569	257.91	229.47	250.6	227.569	217.21	261.71	284.62	227.569	423.49	415.84	428.18	227.568	419.77	346.37	404.55	227.569	365.92	407.45	421.3	227.568	262.66	250.65	308.95	334.61	227.569	358.57	273.09	288.6	227.568	345.68	325.89	288.04	227.568	248.6	236.66	299.45	326.9	227.568	320.29	240.33	233.54	227.568	313.01	273.32	251.8
228.268	282.87	248.27	260.02	228.269	259.68	228.26	250.45	228.269	218.19	260.88	284.64	228.269	423.55	414.73	420.62	228.268	419.59	344.41	401.12	228.27	365.56	407.91	422.23	228.268	263.15	250.86	308.19	335.55	228.269	359.35	274.08	288.6	228.27	345.36	325.89	287.71	228.268	249.26	237.16	300.06	327.25	228.27	320.43	241.52	234.16	228.268	312.57	273.08	252.43
228.968	277.49	245.07	259.89	228.968	253.05	228.21	251.14	228.969	220.5	260.47	284.51	228.969	423.75	414.91	423.13	228.97	432.74	344.74	399.58	228.97	366.11	409.09	424.45	228.968	264.11	250.87	307.44	335.87	228.97	356.48	274.38	288.31	228.969	345.06	326.56	288.37	228.968	249.72	236.93	301.03	330.61	228.969	320.98	241.89	234.54	228.968	313.29	272.35	253.07
229.668	278.09	247.74	260.45	229.668	247.46	227.89	251.46	229.669	220.59	259.97	284.67	229.669	423.34	415.91	417.1	229.668	431.27	346.45	398.9	229.67	365.91	408.68	435.07	229.67	264.21	251.1	306.77	329.39	229.668	353.82	274.02	287.96	229.669	352.67	325.82	288.14	229.668	251.43	236.96	305.77	329.39	229.669	329.52	242.68	234.81	229.668	314.86	271.56	253.13
230.367	278.29	248.21	260.99	230.369	246.25	227.58	254.67	230.369	218.82	260.3	284.36	230.369	424.86	415.33	416.13	230.369	423.34	347.58	398.51	230.37	365.34	408.52	428.88	230.368	264.8	251.15	306.44	323.54	230.369	350.5	273.52	287.61	230.368	361.08	326.05	288.11	230.368	251.92	237.14	307.38	329.43	230.37	330.4	243.69	234.68	230.368	317.78	270.71	252.43
231.069	279.37	247.86	260.4	231.068	246.84	227.65	253.12	231.069	217.36	260.33	284.27	231.068	425.29	414.9	415.11	231.069	419.17	359.75	398.2	231.07	365.66	408.75	424.94	231.068	265.64	251.17	307.02	322.3	231.071	349.59	273.33	287.77	231.069	353.52	327.18	288.55	231.069	249.2	237.21	304.39	327.61	231.068	324.39	244.01	235.37	231.068	318.68	271.4	252.2
231.768	278.45	246.67	260.05	231.768	247.32	227.43	250.02	231.769	216.58	259.73	284.49	231.769	425.19	414.92	415.64	231.77	416.89	349.75	398.16	231.764	365.31	408.5	423.43	231.77	266.22	251.01	306.84	323.54	231.769	350.29	272.79	287.65	231.768	349.61	326.52	287.76	231.768	245.4	237.32	303.74	327.27	231.77	317.44	243.85	235.76	231.768	315.65	271.23	251.14
232.468	274.45	246.68	260.67	232.469	247.27	227.18	248.38	232.469	216.07	260.16	284.6	232.469	425.4	418.05	416.63	232.47	417.57	345.21	398.91	232.47	365.8	408.87	420.83	232.47	265.81	256.85	306.45	324.49	232.469	350.97	273.71	287.24	232.469	349.11	327.76	288.18	232.468	246.69	237.7	301.61	326.75	232.47	317.53	244.28	235.43	232.469	312.75	271.02	251.16
233.168	272.32	246.96	261.09	233.17	247.38	227.81	247.39	233.17	215.88	259.88	284.67	233.169	425.65	427.53	416.96	233.169	416.13	346.79	399.42	233.168	365.66	411.21	420.55	233.17	267.08	256.48	306.81	324.75	233.168	350.91	273.3	287.95	233.167	344.5	329.35	288.05	233.168	247.09	241.9	302.28	326.64	233.17	318.76	244.71	235.91	233.169	312.39	270.51	251.72
233.868	273.31	246.5	260.74	233.868	248.05	227.72	247.91	233.868	216.03	260.31	284.54	233.869	426.81	419.27	424.16	233.869	415.89	347.2	399.05	233.869	365.27	416.71	421.28	233.868	266.65	250.14	306.69	323.83	233.867	352.08	274.54	287.29	233.87	342.99	331.53	288.26	233.868	247.63	245.67	301.47	327.33	233.868	318.77	244.45	235.97	233.869	311.81	270.7	251.94
234.568	274.18	249.65	260.63	234.568	248.75	226.94	248.49	234.57	216.31	260.3	283.89	234.569	427.05	414.45	423.76	234.569	416.13	356.51	398.32	234.569	365.73	414.87	421.55	234.568	267.44	245.96	307.19	323.98	234.567	351.01	274.22	288.07	234.571	342.8	332.36	288.19	234.568	247.73	242.11	300.73	326.59	234.57	319.99	244.98	236.16	234.569	312.61	271.37	253.93
235.269	274.94	246.2	260.35	235.27	248.87	227.01	248.91	235.27	215.84	260.37	283.81	235.269	427.37	414.97	419.43	235.269	416.88	347.49	398.88	235.269	365.9	412.91	420.54	235.268	267.58	246.01	305.15	323.07	235.268	351.76	272.87	288.68	235.27	343.24	329.93	288.15	235.268	248.96	237.51	301.04	327.42	235.269	319.62	244.84	235.86	235.269	312.16	270.28	253.39
235.969	275	248.21	260.29	235.969	249.52	226.88	249.79	235.97	215.86	259.9	283.68	235.969	428.44	414.36	416.9	235.967	417.25	345.95	400.43	235.969	365.45	410.63	421.81	235.968	267.77	247.62	309.14	322.81	235.968	351.97	281.19	288.68	235.971	343.61	327.77	288.96	235.967	248.22	235.19	300.46	326.66	235.969	319.23	245.08	236.1	235.969	311.81	271.24	251.2
236.668	276.15	246.57	267.3	236.669	249.01	226.36	249.74	236.668	215.88	259.93	285.04	236.668	428.4	415.07	417.18	236.669	418.66	346.92	399.05	236.669	366.19	408.56	420.25	236.669	268.01	247.92	309.44	322.97	236.668	351.61	278.29	288.99	236.668	344.18	327.12	288.06	236.667	248.38	235.21	300.25	327.14	236.669	319.13	245.19	236.42	236.669	311.4	271.4	258
237.368	275.28	246.94	271.94	237.369	249.18	226.57	250.59	237.369	216.19	260.2	284.9	237.369	428	416.25	416.91	237.367	418.23	347.7	398.99	237.37	366.64	408.95	421.81	237.368	268.42	249.27	310.33	322.4	237.368	352.46	279.35	288.56	237.37	344.72	326.37	288.05	237.368	249.12	235.24	300.25	327.61	237.369	319.31	244.33	236.44	237.368	312.09	270.79	250.01
238.067	275.35	247.04	268.08	238.069	250.23	226.07	251.17	238.068	216.46	264.82	285.14	238.069	428.41	419.77	416.85	238.067	418.57	346.27	398.51	238.068	366.32	408.62	421.31	238.069	268.5	249.38	307.85	322.35	238.068	352.41	274.01	288.98	238.07	344.54	325.02	288.24	238.068	249.49	235.81	300.32	327.31	238.069	319.16	250.85	236.28	238.068	311.53	270.81	244.69
238.767	276.78	248.02	264.2	238.769	250.09	226.36	251.16	238.769	216.52	266.67	284.68	238.769	428.33	422.1	418.6	238.767	420	346.26	399.01	238.769	366.27	409.17	420.99	238.767	268.38	253.89	308.12	322.35	238.768	352.18	274.16	288.94	238.77	344.56	325.51	288.49	238.768	249.65	235.92	299.95	326.77	238.769	319.65	250.59	236.1	238.77	312.36	271.24	245.35
239.467	276.85	247.78	263.54	239.469	249.85	226.35	253.11	239.469	216.15	264.04	284.02	239.469	428.84	413.79	418.07	239.467	419.96	346.67	398.24	239.468	366.54	409.98	421.86	239.467	268.88	255.67	307.67	322.26	239.469	352.56	273.78	289.28	239.469	343.5	324.24	288.12	239.468	250.18	235.91	299.62	328.25	239.469	319.6	247.2	235.87	239.47	312	270.43	246.82
240.169	277.7	248.18	266.96	240.169	249.42	226.61	254.08	240.169	216.41	262.44	283.93	240.169	432.21	415.65	417.53	240.17	419.81	356.33	398.74	240.17	366.72	416.22	422.5	240.167	273.12	251.79	307.92	322.01	240.169	352.58	274.63	289.09	240.169	344.01	324.8	288.61	240.168	250.3	236.31	300.6	328.81	240.169	320.37	243.89	236.49	240.168	312.48	270.76	247.78
240.869	277.19	247.84	267.99	240.869	250.07	238.77	249.44	240.868	216.49	261.84	281.93	240.869	438.71	414.11	418.05	240.868	419.65	346.21	398.69	240.868	366.95	420.58	427.32	240.869	271.48	246.58	306.72	321.99	240.868	352.13	273.98	289.44	240.87	344.13	323.61	288.66	240.868	250.72	236.47	299.88	327.53	240.87	320.02	242.25	236.29	240.868	312.73	270.31	247.9
241.567	277.79	247.83	264.62	241.569	250.41	245.16	248.41	241.568	216.53	261.42	289.1	241.57	431.27	416.38	419.08	241.568	421.85	346.36	398.25	241.57	367.31	417	428.08	241.569	266.86	247.97	306.73	321.49	241.568	352.38	274.06	289.17	241.57	343.7	324.14	288.19	241.568	251.08	236.48	300.26	327.63	241.57	320.7	240.91	236.11	241.568	313.71	271.03	248.88
242.268	278.39	248.04	262.74	242.269	250.31	238.85	247.71	242.269	216.64	260.51	287.56	242.27	430.25	416.18	434.12	242.268	420.78	345.34	398.83	242.27	367.42	412.19	424.99	242.268	262.66	248.82	306.75	321.28	242.268	353.57	274.05	293.37	242.27	343.37	323.9	288.37	242.268	251.54	236.26	299.92	327.62	242.269	319.93	241.52	236.4	242.268	313.42	279.9	250.29
242.968	278.07	248.17	262.54	242.969	250.71	237.02	247.44	242.969	216.87	260.45	280.46	242.97	429.57	417.39	431.16	242.967	419.61	346.53	410.35	242.969	367.3	411.07	422.57	242.968	263.15	249.23	307.04	322.01	242.97	352.52	273.81	295.68	242.97	343.31	324.11	288.23	242.968	250.77	236.02	300.08	329.55	242.969	321.18	242.91	236.39	242.969	313.38	282	251.2
243.668	278.16	248.31	261.39	243.665	250.98	230.48	247.72	243.668	216.63	260.67	277.6	243.668	426.33	416.54	420.81	243.668	424.76	346.76	409.6	243.67	367.27	410.67	421.56	243.668	263.53	249.87	307.23	321.14	243.668	352.34	273.23	289.41	243.67	343.31	323.51	287.95	243.668	250.85	236.33	299.41	332.07	243.669	322.06	243.95	236.69	243.67	313.61	280.13	252.44
244.367	277.76	254.11	261.7	244.37	250.91	228.72	248.78	244.368	216.97	260.24	277.07	244.37	424.65	415.36	418.5	244.369	433.77	347.61	402.35	244.368	367.16	410.27	421.48	244.368	264.29	250.53	307.56	322.36	244.368	351.96	273.3	286.83	244.37	344.05	324.39	288.46	244.368	251.1	236.84	299.56	331.37	244.369	329.62	244.19	236.6	244.368	313.31	277.8	252.93
245.067	282.85	260.63	261.63	245.07	251.1	227.95	249.51	245.068	216.7	259.92	277.57	245.069	424.58	416.05	416.93	245.067	430.34	347.64	405.44	245.068	375.4	410.2	422.45	245.07	264.57	251	306.98	321.66	245.068	352.73	273.38	287.7	245.069	344.4	324.76	288.63	245.067	251.4	238.15	299.15	328.18	245.069	328.68	244.67	236.8	245.069	312.95	273.23	253.39
245.768	283.46	255.68	261.37	245.77	250.68	227.75	249.59	245.768	216.55	259.5	277.8	245.769	423.79	416.47	416.81	245.768	424.13	351	402.01	245.768	366.57	410.15	421.42	245.768	264.57	251.48	307.34	322.5	245.769	352.91	272.86	287.66	245.769	343.69	324.71	289.25	245.767	251.64	244.39	303.07	328.13	245.768	320.21	245.89	236.96	245.769	313.07	272.84	253.68
246.468	278.52	248.05	260.92	246.469	251.29	227.7	250.06	246.469	216.23	267.2	278.24	246.47	425.33	416.11	419.58	246.47	417.13	341.26	400.05	246.47	359.75	417.78	421.64	246.47	265.6	251.94	307.36	328.22	246.469	352.47	272.42	286.97	246.468	344.17	324.61	289.28	246.47	251.56	243.26	306.26	327.5	246.47	319.17	245.82	236.75	246.467	313.45	271.91	253.71
247.168	279.43	247.12	261.38	247.169	250.61	226.95	250.31	247.169	216.79	269.18	278.65	247.17	426.71	428.92	419.48	247.17	415.52	343.51	400.15	247.168	361.95	416.87	421.83	247.167	266.14	250.97	306.67	330.35	247.169	351.88	273.62	287.48	247.168	344.28	324.38	296.66	247.167	251.77	238.24	305.98	327.17	247.168	319.75	245.61	236.21	247.167	313.05	271.45	253.71
247.868	275.71	246.53	261.28	247.869	250.97	235.73	251.09	247.869	216.56	265.08	279.27	247.869	427.88	431.78	424.81	247.871	417.66	343.09	399.24	247.868	364.28	416.71	421.37	247.867	266.8	257.95	307.22	323.66	247.869	352.51	273.79	287.61	247.87	344.32	326.78	296.25	247.87	251.58	236.01	303.32	327.29	247.865	320.63	245.69	236.41	247.868	313.66	271.63	249.01
248.568	275.8	246.05	261.01	248.569	250.95	242.39	254.79	248.569	217.9	262.36	279.21	248.569	428.29	418.07	425.55	248.569	418.01	343.82	398.31	248.568	364.07	416	421.61	248.57	267.35	257.1	306.48	326.3	248.569	352.32	274.28	287.37	248.568	345.07	329.24	286.26	248.568	251.62	236.21	304.05	328.68	248.569	321.4	245.56	236.59	248.569	313.8	270.96	255.61
249.268	274.46	246.21	260.64	249.268	251.37	239.16	252.46	249.268	220.27	261.18	279.86	249.269	433.2	413.32	426.91	249.27	418.01	345.13	399.47	249.269	364.7	414.57	422.07	249.268	267.42	249.6	307.27	323.41	249.269	352.67	283.34	286.8	249.268	357.05	329.79	281.51	249.27	252.24	236.76	303.32	328.43	249.269	321.65	245.16	236.87	249.267	313.28	271.33	250.2
249.968	272.32	246.13	260.37	249.969	251.04	235.23	248.59	249.968	220.92	261.14	280.14	249.969	430.38	413.35	421.12	249.969	418.93	346.02	399.14	249.968	364.72	411.3	421.52	249.97	268.1	245.51	314.01	322.71	249.969	352.58	280.12	287.21	249.968	351.5	327.36	279.97	249.968	252.31	236.54	302.53	328.53	249.969	321.82	246.49	236.56	249.967	313.53	271.22	243.26
250.67	272.77	251.8	260.76	250.669	251.3	229.17	247.69	250.668	219.87	260.46	280.59	250.669	427.39	414.73	419.15	250.669	417.9	346.12	399.26	250.668	364.8	412.08	422.01	250.668	268.48	247.15	313.89	322.26	250.669	352.95	276.3	287.32	250.668	346.41	326.68	279.94	250.667	252.79	236.61	302.19	328.54	250.669	321.28	252.38	236.22	250.669	313.46	270.96	244.44
251.365	273.58	253.41	260.98	251.369	251.5	227.92	248.31	251.368	218.91	260.6	280.84	251.367	426.93	415.77	422.02	251.368	419.7	347.17	399.44	251.368	365.89	411.15	421.74	251.368	268.57	248.05	313.28	323.55	251.369	352.55	273.12	287	251.369	342.13	326.62	279.81	251.367	252.75	236.53	301.77	328.62	251.369	321.11	246.86	236.74	251.369	314.13	269.67	245.48
252.063	274.17	248.21	260.84	252.068	251.04	227.06	247.81	252.068	217.33	260.27	281.38	252.069	427.28	416.81	418.86	252.066	417.04	352.18	397.9	252.07	366.62	411.53	422.52	252.07	269	247.89	310.3	322.8	252.069	352.73	272.99	286.59	252.069	340.81	326.93	281.25	252.067	261	236.78	302	328.77	252.069	320.48	242.25	236.15	252.067	315.05	270.35	248.34
252.768	275.27	247.11	261.14	252.768	252.03	226.9	248.81	252.769	216.32	259.74	281.7	252.769	427.06	416.5	418.18	252.769	418.24	338.55	398.42	252.77	366.58	410.98	422.18	252.769	269.12	249.42	308.86	321.76	252.769	352.65	273.4	286.9	252.769	341.78	325.21	281.85	252.768	255.61	238.49	300.75	327.45	252.769	320.86	243.1	235.95	252.769	314.09	270.36	247.56
253.468	275.29	247.74	261.11	253.469	252.23	226.94	249.29	253.469	216.64	260.07	281.67	253.47	427.11	416.85	417.73	253.471	417.11	346.57	398.24	253.47	366.26	417.46	422.3	253.469	269.53	250.58	308.87	323.09	253.467	352.24	272.95	287.08	253.471	341.27	323.95	282.76	253.467	249.12	244.7	301.77	330.57	253.469	320.41	242.16	237.19	253.468	313.64	273.2	249.02
254.167	276.02	249.36	261.01	254.169	252.37	226.98	249.75	254.17	216.95	259.3	281.9	254.168	427.77	418.21	417.98	254.166	418.22	344.14	398.54	254.168	365.86	416.73	422.1	254.168	268.7	250.59	308.36	322.02	254.167	352.8	273.35	287.65	254.169	342.23	324.4	283.75	254.169	245.32	241.78	301.79	338.04	254.169	322.01	241.42	236.47	254.169	313.62	277.51	249.1
254.869	276.84	246.28	268.83	254.869	252.57	227.19	250.38	254.868	216.63	259.99	281.54	254.868	428.25	414.73	418.2	254.87	419.72	340.29	409.41	254.867	367.06	420.09	423.01	254.868	269.54	251.35	307.61	322.74	254.869	353.11	273.48	287.7	254.871	341.58	323.5	283.41	254.867	247.37	238.51	301.82	334.8	254.869	321.85	242.4	236.96	254.867	312.94	279.22	250.65
255.567	275.66	247.79	273.85	255.564	253.01	226.67	250.13	255.568	216.42	260.1	281.78	255.569	427.78	415.55	419.06	255.57	420.75	343.76	411.77	255.568	367.26	416.74	422.05	255.569	270.06	255.52	307.44	321.6	255.568	351.97	273.55	288.4	255.569	341.57	324.53	284.61	255.567	248.16	236.76	301.56	334.19	255.569	321.48	243.66	237.09	255.568	314.32	275.17	251.63
256.268	277.23	247.97	273.22	256.268	252.52	227.06	250.97	256.268	215.59	260.41	281.96	256.269	427.71	418.74	418.42	256.268	421.43	343.13	405.74	256.268	366.7	414.69	422.6	256.27	274.24	257.26	307.52	322.53	256.268	351.99	274.36	288.34	256.269	342.17	324.14	285.06	256.267	248.78	236.92	301	331.34	256.267	325.46	244.66	236.93	256.268	313.41	272.86	251.7
256.968	277.26	247.37	268.84	256.969	252.76	226.51	251.37	256.968	216.11	259.96	282.07	256.969	427.75	417.2	419.05	256.97	421.54	343.72	403.5	256.968	366.57	412.7	423.1	256.969	272.23	250.38	307.8	323.43	256.967	351.94	274.08	288.03	256.969	342.3	323.58	286.71	256.968	248.15	236.37	301.53	330.5	256.968	328.79	245.1	236.88	256.968	313.94	271.81	252.31
257.668	277.88	248.21	265.53	257.671	253.5	225.49	251.5	257.668	216.09	260.49	282.49	257.669	427.9	415.03	418.05	257.666	421.44	344.8	401.52	257.668	366.7	411.38	423.6	257.669	264.86	246.18	308.04	323.05	257.667	352.06	274.25	288.77	257.67	342.29	324.42	286.88	257.668	249.1	237.13	301.09	334.27	257.667	324.39	244.79	236.84	257.669	313.95	272.2	252.53
258.369	277.73	247.65	264.19	258.369	258.61	226	250.75	258.368	215.92	260.1	282.05	258.368	428.23	415.64	418.46	258.368	420.19	345.36	399.47	258.368	367.4	411.4	431.53	258.369	263.47	247.69	308.57	322.37	258.367	351.69	274.16	292.55	258.369	348.53	324.36	287.15	258.367	249.78	237.02	300.79	335.01	258.368	320.83	245.18	237.1	258.368	313.74	272.4	252.23
259.067	278.38	248.37	262.79	259.069	257.99	225.2	251.04	259.068	216.32	263.79	283.25	259.068	427.75	422.54	417.89	259.066	420.14	344.68	399.75	259.067	366.56	411.24	427.17	259.07	264.05	248.68	308.07	323.09	259.067	352.59	274.07	297.71	259.071	355.09	323.39	287.35	259.067	250.78	237.34	301.3	332.81	259.068	321.58	245.12	237.2	259.069	313.35	272.77	251.53
259.763	277.63	249.57	262.16	259.769	251.5	225.31	250.66	259.767	216.44	268.33	283.49	259.768	428.05	416.98	418.21	259.769	420.56	345.98	399.99	259.767	366.98	415.81	423.27	259.769	264.95	249.96	305.61	323.63	259.767	352.5	274.26	293.71	259.775	349.19	324.32	287.6	259.767	250.68	237.21	301.07	330.68	259.768	321.4	244.46	236.77	259.769	312.88	271.27	253.99
260.467	278.09	257.71	262.2	260.47	246.14	224.75	251.49	260.468	216.57	267.53	282.74	260.468	427.72	417.92	422.81	260.469	428.47	346.91	400.8	260.467	367.61	417.82	420.91	260.469	266.06	250.49	309.68	324.08	260.468	352.41	273.73	288.69	260.473	344.31	324.82	286.93	260.467	251.35	237.44	301.2	332.09	260.468	321.48	244.47	236.89	260.469	313.03	272.26	253.47
261.167	278.99	258.4	261.69	261.168	245.13	225.73	251.75	261.168	216.49	262.73	282.97	261.168	429.93	415.33	435.9	261.165	428.54	358.05	399.88	261.167	367.62	421.37	419.98	261.169	266.61	251.38	312.27	324.07	261.168	352.5	272.72	289.31	261.169	341.4	324.89	287.83	261.167	252.37	237.25	303.7	331.02	261.168	321.71	244.52	236.66	261.169	313.21	272.37	253.17
261.867	286.01	250.37	261.04	261.87	245.64	226.4	250.93	261.868	216.64	261.17	283.76	261.868	436.66	414.94	429.83	261.869	423.97	347.06	399.88	261.867	367.48	418.31	420.56	261.869	267.05	251.57	312.07	324.04	261.869	362.75	272.46	287.36	261.869	341.48	324.43	288.19	261.869	252.55	237.22	306.95	330.7	261.868	321.69	245.41	236.76	261.869	312.89	271.61	253.79
262.567	281.71	247.38	261.22	262.57	246.57	225.3	252.35	262.568	216.45	260.61	283.27	262.569	435.23	415.72	422.43	262.569	420.3	345.91	399.73	262.569	367.19	415.11	420.84	262.569	267.32	251.93	313.72	324.5	262.567	365.87	273.17	286.82	262.569	341.54	324.33	287.93	262.567	252.93	237.95	304.25	330.54	262.568	321.26	244.89	237.17	262.569	313.21	272.04	253.41
263.267	279.94	248.92	260.83	263.27	247.07	225.48	254.61	263.267	216.63	260.21	283.49	263.269	430.55	415.83	427.86	263.27	417.48	350.88	399.99	263.269	367.52	413.21	421.13	263.269	267.87	253.61	309.88	323.75	263.27	364.29	273.62	287.73	263.27	341.63	323.76	288.3	263.267	252.99	237.64	305.3	329.75	263.27	321.2	245.35	236.9	263.269	313.06	272.39	252.35
263.968	279.31	248.71	260.95	263.969	247.31	225.05	249.56	263.967	216.61	260.25	282.65	263.97	427.08	416.83	425.99	263.97	417.07	343.44	399.98	263.969	367.24	412.01	420.7	263.969	267.96	258.41	309.59	333.78	263.968	353.27	274.36	287.58	263.97	342.47	323.7	288.16	263.968	252.78	237.92	305.07	329.92	263.968	321.59	244.23	236.85	263.97	312.79	272.05	256.65
264.668	278.68	249.7	261.11	264.669	247.83	225.72	249.55	264.668	216.57	260.65	283.12	264.67	425.62	426	420.96	264.669	417.85	343.18	399.55	264.667	367.58	411.9	420.99	264.668	268.52	256.69	309.55	332.87	264.668	349.91	274.51	287.35	264.67	343.86	323.26	288.21	264.668	253.36	238.28	302.26	330.28	264.67	322.26	245.23	237.57	264.668	313.62	271.92	253.26
265.37	276.06	248.45	261.26	265.37	248.27	236.99	249.01	265.367	217	260.23	283.57	265.368	425.17	423.9	419.38	265.369	417.69	345.13	399.83	265.369	367.43	411.51	421.1	265.368	269.05	250.1	309.6	323.42	265.37	347.07	274.67	287.26	265.37	342.42	323.98	287.52	265.368	252.87	238.59	302.69	330.09	265.368	322.74	245.17	236.92	265.369	317.18	272.21	244.91
266.068	275.04	246.33	261.61	266.068	248.76	245.01	248.46	266.068	216.8	260.53	284.01	266.068	425.38	414.78	424.53	266.065	417.74	345.19	400.17	266.068	367.52	411.23	420.54	266.068	269.14	247.33	308.85	325.67	266.069	346.65	274.22	287.64	266.069	342.38	323.04	287.69	266.068	252.84	238.6	301.78	330.17	266.068	322.92	244.41	237.21	266.069	316.54	271.7	243.12
266.769	273.2	248.92	261.22	266.77	248.99	240.83	248.09	266.768	216.97	263.22	283.7	266.77	426.33	416.84	423.15	266.769	418.3	345.23	400.07	266.769	368.29	419.04	420.67	266.769	269.93	247.42	309.15	322.97	266.771	346.83	274.56	288.12	266.769	341.41	326.46	287.42	266.769	252.47	238.93	301.09	329.93	266.768	322.3	244.72	237.23	266.765	313.33	272.12	245.17
267.467	274.68	248.1	260.86	267.468	249.51	235.64	248.78	267.468	217.17	269.09	283.22	267.469	427.18	415.64	426.42	267.469	417.78	347.96	399.37	267.469	368.41	418.32	421.13	267.469	270.12	248.67	308.61	324.84	267.469	346.96	274.51	287.86	267.47	341.87	331.27	288.18	267.467	260.96	238.6	302.31	334.94	267.47	322.55	246.08	237.42	267.467	312.7	278.93	247.38
268.169	274.6	249.14	267.72	268.17	249.58	230.71	248.93	268.168	217.25	270.28	282.43	268.169	427.1	415.36	426.41	268.169	418.27	341.66	399.58	268.167	368.33	421.4	421.87	268.169	270.68	249.32	308.45	324.91	268.17	346.82	274.68	288.47	268.168	342.16	327.11	288.24	268.168	255.18	238.48	301.67	334.07	268.169	322.78	245.62	237.15	268.168	313.06	279.32	247.17
268.867	274.52	248.16	270.62	268.868	250.08	227.76	249.25	268.867	217.18	265.28	283.08	268.868	428.29	415.95	420.95	268.87	418.21	339.98	399.11	268.867	368.16	417.26	422.35	268.868	270.57	250.56	308.21	323.78	268.87	347.49	274.27	287.64	268.868	343.15	325.79	288.06	268.867	246.99	238.59	301.6	332.26	268.868	322.33	245.36	236.96	268.868	311.2	276.82	248.29
269.569	274.43	249.36	268.19	269.568	249.64	227.23	249.83	269.569	217.33	262.01	283.59	269.569	427.71	416.14	419.93	269.57	419.21	343.37	399.21	269.567	368.49	415.83	424.21	269.569	270.82	250.88	308.53	323.95	269.569	348.57	274.77	288.54	269.568	343.26	324.96	288.81	269.568	244.98	238.82	301.08	330.98	269.569	321.98	245.54	237.01	269.569	312.64	274.2	249.67
270.268	275.97	247.98	264.62	270.267	250.51	227.08	250.52	270.269	217.12	261.57	284.05	270.269	428.73	416.72	419.54	270.269	419.69	345.11	398.88	270.269	367.85	414.06	429.7	270.27	270.99	252.48	308.07	324.14	270.269	348.63	274.98	288.35	270.268	343.17	323.21	288.65	270.269	247.96	238.81	302.28	330.41	270.269	322.37	245.31	243.79	270.265	312.12	272.78	250.8
270.968	276.09	248.07	265.44	270.967	250.41	226.09	250.26	270.969	218.45	261.2	284.32	270.97	433.7	428.16	419.1	270.97	420.32	344.82	398.35	270.967	367.91	413.23	424.46	270.97	270.94	253.05	307.81	324.13	270.97	349.17	275.23	288.09	270.968	342.51	323.43	292.17	270.966	248.77	239.09	301.17	330.47	270.969	322.53	245.54	249.64	270.968	311.8	272.69	250.73
271.67	276.89	248.3	265.69	271.668	250.43	226.41	250.6	271.667	219.38	260.95	283.77	271.668	435.62	419.58	420.15	271.67	419.81	345.46	397.94	271.668	368.42	412.54	422.13	271.67	271.01	253.28	309.46	324.08	271.67	348.97	275.04	288.7	271.668	344.17	323.09	295.29	271.666	249.47	239.15	301.07	330.3	271.669	322.37	245.06	239.73	271.669	311.39	273.09	251.88
272.364	277.09	248.08	265.18	272.368	250.49	226.11	250.21	272.368	219.71	260.4	282.57	272.368	431.54	416.73	419.38	272.37	421.34	344.74	398.84	272.368	368.77	412.62	420.07	272.369	271.97	253.44	314.4	323.58	272.369	349.25	274.36	288.72	272.368	344.35	323.3	291.61	272.367	249.65	238.81	301.31	330.54	272.37	322.27	244.98	236.7	272.369	312.07	273.78	252.64
273.064	276.52	248.2	263.72	273.068	250.81	225.52	250.83	273.068	219.86	260.41	282.79	273.069	429.66	415.5	420.04	273.07	419.85	346.06	398.77	273.068	368.78	412.17	420.2	273.069	271.49	253.52	312.99	323.88	273.07	349.71	274.17	287.89	273.068	344.21	322.94	283.24	273.068	250.9	239.17	301.92	330.76	273.068	322.19	244.65	233.19	273.07	312.71	272.95	252.74
273.764	277.01	248	263.41	273.768	250.95	225.7	251.13	273.769	218.57	265.49	281.85	273.768	426.92	414.23	419.67	273.77	420.11	351.63	398.82	273.769	368.32	411.76	421.03	273.77	272.77	254.07	313.32	324.04	273.769	350.02	273.99	288.59	273.769	344.31	322.83	281.72	273.768	250.51	239.21	301.32	331.2	273.768	321.83	244.93	233.91	273.768	312.34	273.63	253.13
274.466	277.99	249.85	263.43	274.469	250.4	225.99	250.87	274.467	216.67	267.98	282.03	274.47	424.35	415.92	419.1	274.47	420.63	343.46	398.77	274.468	368.29	417.96	421.12	274.468	273.86	253.93	311.17	324.05	274.469	349.46	274.32	287.73	274.468	343.74	322.61	281.06	274.469	251.77	239.87	300.84	335.79	274.468	321.89	245.36	234.61	274.468	313.51	274.15	253.26
275.166	277.08	256.02	262.52	275.167	250.16	226.27	253.65	275.168	215.88	265.79	281.93	275.168	424.37	416.45	419.73	275.169	420.88	341.02	400.43	275.168	368.97	416.88	420.31	275.169	268.44	254.49	309.62	324.08	275.169	349.71	273.27	288.39	275.168	344.24	322.99	280.02	275.167	251.89	246.86	301	340.58	275.169	322.11	245.71	234.44	275.168	313.4	273.59	253.7
275.866	278.25	250.28	262.02	275.869	250.58	225.63	254.26	275.869	215.4	262.16	283.04	275.87	428.06	416.63	420.76	275.87	420.01	339.84	401.65	275.869	368.9	418.32	420.41	275.869	263.22	253.82	309.65	324.3	275.869	349.6	273.99	287.8	275.868	344	323.4	280.27	275.869	251.69	246.3	301.18	334.13	275.868	322.32	245.06	235.03	275.868	313.46	274.16	253.45
276.568	278.85	248.57	261.79	276.569	250.79	225.53	249.1	276.568	215.58	261.66	283.02	276.568	431.33	417.23	421	276.569	420.46	346.42	410.71	276.568	368.72	415.1	421.01	276.569	263.99	254.37	309.63	323.22	276.569	349.5	274.29	288.62	276.569	343.62	322.44	279.91	276.569	252.74	242.29	301.6	332.6	276.569	322.65	245.88	235.35	276.57	313.81	273.83	252.11
277.268	277.78	246.92	262.13	277.268	250.86	226.16	248.91	277.268	215.31	261.18	283.08	277.27	429.63	416.89	437.41	277.271	421.14	346.53	403.89	277.268	368.85	413.95	421.4	277.269	265.47	254.23	309.8	324.73	277.269	350.44	274.14	288.73	277.269	344.24	323.41	281.43	277.267	252.72	238.62	303.71	334.81	277.27	322.25	245.25	235.92	277.268	313.82	273.69	254.06
277.968	278.26	247.75	261.34	277.968	251.12	226.26	248.47	277.968	214.98	261.17	283	277.97	427.99	416.91	431.95	277.969	421.61	342.48	403.26	277.967	369.04	413.04	420.23	277.969	265.3	254.41	308.61	324.77	277.969	351.21	274.52	288.46	277.97	344.1	323.59	282.49	277.968	252.96	236.17	305.05	333.61	277.97	322.84	246.47	236.07	277.968	312.63	273.12	253.76
278.668	285.39	246.68	261.81	278.668	251.24	239.71	248.26	278.668	215.27	260.23	283.58	278.665	427.07	416.96	425.08	278.669	423.48	344.24	404.4	278.668	368.97	411.51	421.52	278.669	266.06	253.84	309.1	324.31	278.669	360.1	274.03	288.76	278.668	343.7	323.35	283.15	278.668	252.74	236.24	304.56	332.31	278.669	322.71	246.29	236.17	278.668	317.51	273.85	253.58
279.37	284.14	247.84	261.8	279.37	251.43	238.92	247.87	279.367	215.29	260.26	283.85	279.369	426.39	421.9	421	279.368	423.43	345.28	401.6	279.368	368.65	411.63	421.71	279.369	266.27	254.27	308.77	324.67	279.368	364.36	274.61	289.43	279.369	343.9	323.48	284.09	279.369	253.07	237.27	304.87	332.22	279.369	322.81	246.15	235.79	279.37	317.92	273.4	253.87
280.067	281.59	248.05	261.47	280.068	251.69	235.72	248.72	280.067	215.41	260.44	283.74	280.069	428.27	425.94	418.88	280.07	423.79	346.56	401.01	280.068	368.62	412.09	421.29	280.069	267.14	253.72	308.16	325.51	280.068	360	274.25	289.03	280.068	356.21	323.74	285.57	280.067	258.7	237.59	305.33	332.09	280.07	323.13	246.25	236.29	280.068	313.56	274.06	253.68
280.768	278.55	248.02	261.14	280.769	251.42	232.15	249.39	280.767	214.91	260.93	283.57	280.769	428.62	419	418.07	280.769	421.01	346.23	399.81	280.769	368.7	411.72	421.79	280.77	267.35	258.85	308.92	324.95	280.768	349.54	274.07	288.22	280.768	358.2	323.62	286.15	280.768	255.5	237.85	303.02	332.05	280.768	322.58	246.26	236.57	280.769	312.65	273.67	253.28
281.469	275.92	248.88	260.77	281.469	251.28	227.3	249.53	281.468	214.93	265.88	283.29	281.469	428.67	418.9	417.65	281.469	420.28	345.63	400.1	281.468	367.69	413.07	422.98	281.469	267.99	260.13	308.47	325.48	281.468	348.48	274	288.98	281.47	348.04	327.33	286.07	281.468	248.52	238.46	302.65	332.44	281.468	326.66	245.71	236.12	281.47	311.62	274.09	253.2
282.167	277.86	248.24	260.92	282.168	250.77	226.85	250.08	282.167	215.5	266.59	283.12	282.169	429.62	417.32	419.87	282.169	423.19	350.14	399.22	282.168	368.17	414.13	422.22	282.169	268.22	256.94	309.26	325.41	282.168	346.95	274.1	288.1	282.168	345	328.73	286.66	282.168	248.66	238.46	301.86	331.85	282.168	333.52	245.53	236.95	282.168	310.3	274.26	253.38
282.867	279.34	248.9	261.11	282.87	250.92	226.42	250.36	282.867	215.6	262.29	283.3	282.869	429.21	417.94	420.08	282.869	424.05	350.03	400.08	282.869	366.52	412.95	421.83	282.868	269.12	248.4	308.84	325.71	282.869	346.49	273.36	288.9	282.868	342.09	328.61	286.48	282.87	249.54	238.55	302.18	332.29	282.868	332.06	245.6	236.52	282.87	311.4	278.52	254.72
283.567	280.24	248.06	261.73	283.57	249.54	226.85	250.53	283.569	216.03	261.21	283.33	283.569	429.89	423.69	419.29	283.569	424.31	341.48	399.94	283.569	375.14	412.47	421.48	283.568	268.97	246.61	308.44	325.64	283.569	346.07	273.73	288.84	283.569	340.46	329.43	286.77	283.568	250.2	238.65	301.63	331.65	283.57	326.63	247.47	237.06	283.57	311.38	281.56	254.08
284.269	277.84	248.4	272.23	284.27	250.73	226.96	253.9	284.267	216.1	260.36	283.09	284.269	430.28	424.68	431.65	284.269	424.92	340.27	400.17	284.269	367.95	411.35	421.99	284.268	269.92	247.86	308.43	325.52	284.27	346.69	277.31	289.03	284.269	340.88	326.39	286.94	284.268	250.41	238.81	301.21	331.54	284.269	320.65	251.25	236.92	284.27	311.17	280.88	255.11
284.967	276.34	248.49	274.86	284.968	249.98	226.17	253.25	284.967	216.28	260.08	283.12	284.97	430.45	418.68	423.65	284.969	425.4	342.93	400.44	284.969	359.99	410.83	430.01	284.968	270.05	249.3	311.92	325.7	284.968	347.01	280.06	289.03	284.97	342.61	325.97	286.64	284.969	250.85	239.39	301.14	331.87	284.969	319.86	249.38	236.66	284.969	311.6	276.82	257.09
285.668	276.28	248.6	269.75	285.67	250.46	225.81	248.66	285.668	216.49	259.81	283.18	285.67	430.54	417.71	422.38	285.67	425.35	344.1	399.96	285.669	362.53	411.82	427.24	285.664	270.44	250.84	316.13	325.52	285.668	347.83	274.63	289.25	285.67	343.29	323.5	286.14	285.669	251.83	239.15	301.48	331.39	285.666	320.09	245.29	236.5	285.669	311.77	273.79	246.3
286.368	275.53	247.64	264.66	286.37	250.75	225.66	248.05	286.367	216.25	259.66	284.19	286.37	429.32	416.99	427.1	286.368	423.71	344.19	400.22	286.368	364.68	410.6	422.8	286.368	270.41	251.34	314.24	325.58	286.368	348.08	275.56	289.07	286.37	344.46	324.01	287.28	286.368	251.84	239.47	301.55	331.92	286.368	320.8	244.25	236.79	286.368	312.88	272.66	242.98
287.068	275.59	247.77	263.6	287.068	250.51	225.33	248.59	287.069	216.41	260.18	288.17	287.07	429.71	417.02	424.15	287.069	425.04	345.77	400.11	287.069	364.72	410.45	420.3	287.069	270.35	252.24	313.09	325.65	287.068	347.97	272.83	288.8	287.068	344.58	322.83	286.68	287.068	253.38	239.73	301.18	332.02	287.07	321.29	243.32	236.77	287.07	312.76	273.18	244.63
287.768	275.21	247.61	266.35	287.769	250.87	225.26	248.05	287.769	216.26	259.67	286.58	287.77	430.7	423.72	422.52	287.769	424.06	345.47	399.83	287.768	365.44	418.24	419.05	287.769	271.03	252.84	311.65	325.6	287.768	348.1	271.83	289.05	287.77	343.41	321.76	286.92	287.768	257.55	239.73	301.22	331.24	287.766	321.17	242.26	236.01	287.768	313.24	273.24	245.94
288.468	275.97	248.4	266.3	288.467	250.85	225.21	248.09	288.469	216.62	260.44	280.18	288.47	430.58	424.27	421.1	288.469	425.11	345.59	400.17	288.47	365.56	416.94	419.64	288.467	275.04	252.87	311.08	325.4	288.468	348.34	270.82	288.99	288.469	343.61	322.12	286.76	288.47	252.07	239.99	301.43	331.73	288.47	321.73	242.87	235.65	288.468	312.94	273.28	247.54
289.168	276.29	250.58	263.6	289.169	250.68	225.67	248.35	289.169	216.9	265.9	276.21	289.169	430.72	418.58	420.33	289.169	425.81	345.42	399.74	289.168	365.94	421.31	420.03	289.169	272.75	258.45	311.11	325.31	289.17	348.64	270.71	288.98	289.167	344.61	321.98	286.78	289.168	248.61	240.45	301.04	331.6	289.169	321.8	243.42	236.36	289.17	313.39	272.62	247.74
289.868	276.69	257.13	263.6	289.867	251.16	226.34	248.88	289.869	216.66	264.99	276.58	289.87	430.95	417.91	420.37	289.869	430.46	346.5	399.93	289.87	365.92	420.79	420.05	289.869	265.38	259.69	311.25	325.34	289.869	356.12	271.67	288.7	289.868	343.63	322.58	287.1	289.868	249.66	246.57	301.13	331.54	289.869	321.36	242.71	236.2	289.868	313.39	272.6	248.43
290.567	276.9	251	261.98	290.568	250.73	226.32	249.43	290.569	216.52	262.27	275.73	290.57	431.22	416.73	420.36	290.569	433.55	354.1	399.86	290.568	366.06	415.23	419.98	290.568	264.63	253.61	311.63	324.58	290.569	364.83	271.34	289.86	290.568	344.11	322.89	290.99	290.568	250.89	245.18	301.63	330.85	290.569	321.99	242.11	236.35	290.568	313.3	272.24	250.54
291.268	277.45	248.2	261.85	291.269	250.49	226.56	249.85	291.269	216.41	260.53	277.19	291.269	432.78	416.85	427.61	291.268	426.67	360.28	402.12	291.27	366.03	413.12	420.65	291.27	266	247.68	309.68	336.7	291.269	363.73	270.74	288.79	291.269	343.16	322.59	294.87	291.269	250.75	240.77	300.76	334.83	291.269	321.65	250.02	236.02	291.269	313.12	272.14	251.15
291.967	277.66	248.25	261.91	291.967	250.65	225.78	250.33	291.969	216.53	259.67	277.53	291.969	438.81	420.76	426.71	291.968	424.7	343.06	401.33	291.97	365.45	413	419.83	291.969	266.61	248.12	309.93	337.86	291.969	355.21	277.47	289.41	291.967	343.53	322.42	289.11	291.969	251.39	238.27	300.78	338.84	291.971	322.29	247.64	236.18	291.968	312.77	271.86	251.81
292.669	277.77	248.89	261.86	292.67	249.89	225.94	252.81	292.668	216.57	259.8	278.66	292.669	438.43	420.32	426.56	292.668	418.13	350.58	399.36	292.67	366.39	412.22	420.74	292.669	267.32	249.68	309.68	339.07	292.669	347.39	279.26	288.21	292.67	343.67	322.9	281.61	292.669	251.64	237.91	300.59	334.11	292.669	322.62	246	236.27	292.669	313.29	272.29	252.54
293.367	277.6	248.48	262.15	293.369	250.17	225.42	253.1	293.37	216.6	259.6	279.22	293.369	429.12	418.2	422.05	293.37	416.59	339.87	398.12	293.369	366.91	412.62	420.88	293.369	268.08	251.18	309.74	339.49	293.37	346.81	274.88	290.19	293.368	343.56	322.85	280	293.367	251.78	237.94	300.08	334.41	293.369	321.67	244.86	236.21	293.369	312.92	272.34	252.9
294.067	278.14	248.13	262.08	294.068	250.23	226.08	250.34	294.068	217.44	259.86	279.53	294.068	427	418.41	421.81	294.068	416.79	339	399.43	294.069	366.54	412.48	420.98	294.069	267.72	251.56	309.45	335.11	294.068	345.24	274.16	291.25	294.069	344.17	323.75	280.2	294.067	252.44	238.49	301.08	332.9	294.069	322.3	243.26	236.26	294.069	314.11	272.06	253.26
294.768	278.62	248.74	262.01	294.769	250.17	225.16	247.66	294.77	219.46	259.75	279.65	294.768	426.81	418.84	420.76	294.768	417.47	343.32	399.81	294.769	366.51	419.48	421.43	294.769	269.17	252.17	309.62	331.85	294.77	345.98	274.64	290.97	294.769	343.92	323.31	279.7	294.767	252.41	238.63	300.21	332.24	294.77	321.87	243.51	237.12	294.769	313.78	272.87	253.16
295.468	278.64	249.62	261.84	295.468	250.39	225.15	247.65	295.468	220.4	259.41	279.41	295.469	427.44	419.5	424.04	295.469	417.3	343.23	399.08	295.469	367.37	415.56	421.97	295.469	269	252.94	309.41	326.73	295.471	345.49	271.88	290.57	295.469	343.77	322.97	280.4	295.468	254.77	238.92	303.62	331.43	295.47	321.68	244.62	236.58	295.469	313.62	273.1	253.48
296.167	279.19	253.71	262.11	296.17	250.11	225.51	247.58	296.169	218.17	259.83	279.94	296.169	430.88	418.88	423.66	296.169	417.39	344.98	399.17	296.169	367.49	420.87	422.34	296.169	269.98	253.43	310.07	324.31	296.169	346.43	270.64	291.24	296.169	344.04	323.25	281.64	296.168	256.52	238.92	309.28	331.28	296.17	321.79	244.35	236.37	296.169	314.56	276	253.66
296.869	278.91	249	261.73	296.871	250	225.92	247.53	296.867	216.53	259.08	280.66	296.869	432.11	418.93	425.92	296.87	417.57	345.12	398.85	296.868	367.43	417.9	422.27	296.869	269.99	253.92	310.07	327.22	296.871	347.14	271.59	290.32	296.869	344.08	323.52	282.18	296.867	250.19	238.76	312.28	330.98	296.87	321.86	245.65	236.06	296.868	314.42	276.57	253.35
297.568	280.42	246.54	260.87	297.569	251.6	225.9	248.24	297.569	215.51	259.32	280.7	297.569	432.65	414.09	425.44	297.571	418.39	344.12	399.33	297.568	367.91	415.34	424.11	297.57	270.49	254.06	309.77	327.02	297.568	347.17	271.54	296.98	297.569	343.66	323.17	283.25	297.567	248.25	238.54	308.76	331.42	297.568	322.37	245.73	235.79	297.568	313.12	272.8	253.59
298.268	283.78	247.04	263.03	298.27	258.24	225.67	253.66	298.268	215	259.39	280.79	298.269	429.6	414.31	423.15	298.269	416.8	346.09	407.57	298.267	367.69	414.19	422.88	298.268	271.09	253.85	309.89	326.43	298.27	347.4	273.21	300.86	298.269	343.65	322.55	283.34	298.267	249.67	239.17	306	331.46	298.268	322.54	245.91	235.82	298.268	313.63	272.9	253.64
298.968	287.85	247.51	262.08	298.968	260.27	226.05	252.93	298.97	214.83	259.86	280.62	298.969	428.91	416.94	421.62	298.969	420.52	347.09	408.94	298.969	368.03	413.03	422.29	298.97	271.49	254.47	313.6	325.85	298.968	347.67	274.44	294.13	298.97	344.07	323.84	284.54	298.969	250.5	239.11	305.18	331.51	298.968	322.57	251.1	236.31	298.968	313.69	271.83	253.86
299.668	284.77	247.82	261.49	299.67	256.97	226.21	248.97	299.668	214.93	259.66	280.64	299.669	429.1	418.73	421.13	299.667	418.15	348.13	402.16	299.669	368.47	413.1	421.75	299.668	271.22	254.2	312.8	326.67	299.666	347.8	274.74	287.88	299.67	343.84	327.09	285	299.668	251.18	239.44	304.98	331.58	299.668	322.29	249.61	237.15	299.668	313.21	271.42	255.44

## Sheet: Figure 5-supplement 1B-18b
18b-GA																					H2O
Before										After											Before										After
Time [s]	#1 (TD)	#2 (TD)	#3 (TD)	Time [s]	#2 (TD)	#3 (TD)	Time [s]	#1 (TD)	#2 (TD)	Time [s]	#1 (TD)	#2 (TD)	#3 (TD)	Time [s]	#1 (TD)	#2 (TD)	#3 (TD)	Time [s]	#1 (TD)	#2 (TD)	Time [s]	#1 (TD)	#2 (TD)	Time [s]	#1 (TD)	#2 (TD)	#3 (TD)	Time [s]	#1 (TD)	#2 (TD)	Time [s]	#1 (TD)	#2 (TD)	Time [s]	#1 (TD)	#3 (TD)	Time [s]	#1 (TD)	#2 (TD)
0.064	261.54	233.25	244.34	0.066	257.55	272.84	0.065	265.94	311.24	0.066	210.18	245.3	180.53	0.064	225.05	265.89	209.26	0.065	223.15	288.95	0.066	208.37	221.49	0.064	229.67	243.02	276.59	0.064	246.65	223.93	0.065	261.84	214.39	0.065	285.27	303.86	0.066	279.64	245.56
0.768	261.37	233.44	245.52	0.769	257.5	272.61	0.765	264.98	311.31	0.77	208.2	249.75	179.78	0.768	224.82	263.87	208.81	0.768	223.77	288.69	0.768	207.96	217.92	0.768	229.2	242.72	277.79	0.768	246.83	224.97	0.767	262.09	214.29	0.769	273.58	302.28	0.769	280.42	258.3
1.464	260.7	233.74	245.63	1.466	257.37	273.12	1.464	265.67	311.53	1.464	209.76	249.33	179.54	1.464	226.56	263.19	208.74	1.465	223.63	286.7	1.464	208.48	218.64	1.464	229.74	243.38	276.82	1.463	246.65	225.53	1.463	262.42	215.5	1.465	272.38	301.21	1.465	279.26	260.68
2.168	261.31	233.86	245.44	2.17	257.75	272.68	2.167	265.21	310.36	2.168	210.77	243.61	183.64	2.168	227.13	262.61	209.19	2.169	224.17	287.15	2.167	208.4	217.66	2.168	229.72	243.1	274.02	2.167	246.76	225.18	2.167	262.83	215.27	2.169	270.42	301.96	2.169	281.08	255.95
2.868	270.5	233.52	245.68	2.868	256.75	273.35	2.869	265.32	311.38	2.869	209.49	241.87	188.07	2.868	226.31	261.36	209.05	2.869	223.87	285.21	2.865	208.63	215.35	2.867	229.98	243.84	270.27	2.868	246.07	226.05	2.867	263.23	217.38	2.869	270.8	301.93	2.867	280.44	247.36
3.568	273.16	233.97	245.89	3.57	257.55	272.58	3.567	265.26	310.22	3.567	210.7	241.44	187.45	3.565	227.2	260.85	209.19	3.569	223.74	285.05	3.568	209.87	215.4	3.565	230.36	243.07	271.24	3.568	245.9	226.41	3.567	263.71	218.74	3.57	270.7	302.07	3.569	279.28	243.06
4.269	273.35	234.06	245.77	4.269	257.09	272.72	4.269	265.05	311.16	4.267	211.68	242.2	190.34	4.268	226.74	261.74	210.59	4.268	224.06	285.14	4.268	209.12	212.89	4.268	229.61	243.69	270.95	4.268	257.4	226.55	4.267	263.98	220.31	4.268	270.4	303.22	4.269	279.32	242.76
4.969	264.42	234.72	245.74	4.969	257.04	272.66	4.967	264.06	311.43	4.967	212.57	243.47	186.57	4.967	225.2	266.8	223.35	4.968	224.31	284	4.969	209.94	210.52	4.968	229.66	243.74	270.44	4.968	251.61	227.29	4.967	264.62	219.43	4.968	270.41	303.25	4.968	279.81	242.52
5.668	258.51	234.87	246.48	5.668	257.09	272.78	5.667	264.24	311.77	5.667	211.98	243.62	183.66	5.667	225.04	263.95	224.86	5.669	227.7	284.66	5.664	209.47	208.61	5.667	229.39	243.95	270.59	5.668	249.07	227.2	5.667	264.37	220.31	5.668	270.11	302.48	5.667	279.69	243.4
6.368	256.21	234.71	246.7	6.368	257.59	272.28	6.369	264.13	310.19	6.368	211.81	244.15	181.91	6.363	225.26	262.56	221.43	6.369	228.37	289.77	6.368	209.92	210	6.369	229.5	243.58	270.34	6.368	247.19	227.57	6.367	264.37	220.7	6.368	270.66	302.95	6.368	291.19	243.83
7.068	256.8	234.78	246.77	7.067	257.32	272.37	7.067	263.81	313.01	7.068	212.9	245.05	181.49	7.067	225.16	261.89	212.32	7.069	225.4	292.37	7.068	209.75	209.02	7.067	229.87	243.6	270.92	7.064	245.72	226.92	7.067	265.11	222.09	7.068	270.65	302.76	7.068	283.69	244.5
7.768	258.57	234.9	247.18	7.767	256.84	272.1	7.768	264.24	312.57	7.769	212.94	245.18	181.66	7.769	224.65	261.95	210.14	7.769	224.12	290.35	7.77	210.21	209.34	7.769	229.04	243.4	270.74	7.769	246.01	227.35	7.767	264.68	221.96	7.768	271.81	302.79	7.768	273.35	245
8.468	260.98	235.88	247.01	8.467	258.36	271.87	8.468	264.1	312.17	8.469	211.95	245.3	182.61	8.469	224.92	260.71	209.17	8.469	224.29	288.04	8.468	215.27	210.04	8.463	229.16	243.99	270.96	8.468	245.97	228.19	8.468	266.68	222.99	8.469	271.14	302.7	8.47	272.31	244.58
9.169	261.33	235.37	247.8	9.167	267.66	282.1	9.168	264.51	312.84	9.167	218.31	245.14	181.27	9.169	226.67	261.2	209.73	9.169	224.73	286.95	9.17	210.8	211.14	9.169	229.58	244.15	270.88	9.168	246.22	227.98	9.167	267.13	223.75	9.168	271.05	303.2	9.168	265.92	244.52
9.87	263.26	235.1	247.69	9.868	268.37	280.55	9.868	264.58	312.43	9.867	212.93	245.6	182.05	9.868	229.2	261.72	210.03	9.863	223.53	285.22	9.868	210.13	211.76	9.869	229.8	244	271.7	9.868	245.78	227.16	9.868	266.66	224.31	9.869	271.77	303.37	9.868	262.39	243.68
10.568	262.67	235.63	247.83	10.564	264.53	271.75	10.567	281.71	312.27	10.568	207.28	245	182.13	10.569	228.78	261.46	208.87	10.57	223.27	284.15	10.569	210.49	211.94	10.569	231.49	243.91	271.39	10.568	246.65	227.41	10.568	267	224.54	10.567	270.94	303.47	10.569	263.31	244.48
11.269	265.31	236.77	250.05	11.269	257.66	273.09	11.269	286.51	311.84	11.268	205.39	244.93	183.69	11.269	226.8	266.09	209.49	11.267	224.18	284.3	11.267	208.75	212.5	11.269	253.36	243.91	271.65	11.268	245.87	227.62	11.268	266.93	224.97	11.269	271.22	310.22	11.268	266.99	244.44
11.968	262.12	236.22	249.46	11.969	255.92	271.77	11.968	283.1	314.3	11.968	204.87	245.16	182.99	11.969	225.48	263.97	213.41	11.968	224.72	283.11	11.967	208.88	212.9	11.968	260.06	243.61	272.03	11.968	246.25	227.08	11.968	266.48	226.11	11.967	273.04	311.22	11.968	270.35	244.85
12.668	263.7	235.67	245.87	12.669	255.99	271.68	12.668	269.45	312.54	12.668	206.96	247.09	181.27	12.665	224.44	260.99	224.01	12.668	226.26	282.58	12.667	208.19	212.79	12.668	258.26	244.12	271.71	12.668	245.34	226.79	12.668	267.48	226.2	12.668	271.99	304.45	12.667	272.07	245.28
13.369	263.56	236	244.86	13.365	256.66	272	13.368	266.68	311.58	13.367	207.62	249.78	180.63	13.369	224.02	260.87	223.92	13.368	235.55	282.69	13.367	207.83	212.86	13.369	247	244.02	271.95	13.367	245.43	227.08	13.367	267.36	226.91	13.368	271.97	304.68	13.367	273.98	245.01
14.067	263.8	235.98	244.11	14.069	257.09	272.61	14.068	266.61	315.5	14.068	207.82	248.59	180.42	14.07	223.91	261.22	216.22	14.064	231.1	284.99	14.067	207.7	212.41	14.069	238.13	243.83	271.99	14.068	245.63	227.61	14.068	267.34	228.06	14.068	271.89	301.33	14.067	274.31	244.52
14.767	263.81	235.95	245.24	14.768	257.25	272.24	14.768	266.73	316.24	14.768	209.98	243.73	180.98	14.769	224.28	260.8	209.63	14.768	224.79	287.88	14.767	207.16	212.23	14.768	232.3	243.91	272.35	14.769	245.65	227.09	14.767	267.87	233.57	14.77	271.27	302.33	14.767	275.59	244.5
15.467	263.36	245.33	246.46	15.468	257.23	272.01	15.468	266.53	314.47	15.468	211.22	240.2	178.86	15.47	223.51	260.75	208.98	15.468	222.52	289.1	15.469	208.36	212.36	15.464	231.37	243.51	272.58	15.468	245.73	227.03	15.466	268.18	259.69	15.468	271.33	302.41	15.469	276.54	244.92
16.168	263.77	244.04	246.18	16.169	257.2	272.18	16.169	265.72	314.08	16.168	210.46	239.4	181.23	16.164	224.51	260.33	208.63	16.165	222.39	287.74	16.167	208.46	213.22	16.169	231.12	244.42	271.69	16.169	246.18	227.19	16.166	267.76	253.85	16.168	271.31	303.06	16.169	275.9	250.52
16.868	262.19	242.7	246.18	16.869	256.61	272.09	16.869	265.84	314.06	16.867	207.7	240.41	181.14	16.868	223.46	260.6	208.81	16.865	223.69	285.35	16.868	208.28	212.82	16.869	231.08	243.33	271.76	16.871	246.28	227.14	16.866	268.16	238.17	16.868	271.12	302.86	16.867	276.42	258.68
17.568	262.43	237.23	247.57	17.566	257.26	272.33	17.569	265.51	314.66	17.569	208.09	241.81	180.17	17.566	226.07	262.26	208.63	17.568	223.71	285.04	17.568	208.61	212.9	17.57	230.54	244.17	272.08	17.568	246.53	227.22	17.566	268.94	244.63	17.568	271.52	303.15	17.567	277.55	257.19
18.268	262.58	237.47	246.98	18.268	257.43	271.76	18.268	265.43	313.01	18.27	208.56	242.82	182.89	18.268	228.75	265.52	208.82	18.268	223.93	285.27	18.268	208.94	212.76	18.27	231.94	244.55	274.28	18.269	246.85	227.12	18.266	268.31	231.63	18.268	271.39	302.87	18.267	277.28	251.71
18.968	261.17	235.97	247.73	18.968	256.86	272.06	18.968	265.37	313.29	18.969	210.46	243.48	183.11	18.968	228.83	263.59	208.79	18.968	224.98	283.98	18.968	208.51	212.85	18.97	231.84	243.97	280.66	18.968	247.2	227.02	18.967	268.55	227.47	18.969	272.1	303.19	18.969	278.12	241.78
19.668	261.98	236.32	248.44	19.668	257.98	275.51	19.668	265.29	314.18	19.668	211.4	244.33	189.58	19.669	229.66	262.4	221.93	19.668	224.12	283.55	19.668	208.53	212.73	19.67	230.88	244.3	278.95	19.663	246.77	227.32	19.667	269.38	233.63	19.669	271.9	304.18	19.667	277.78	242.39
20.369	262.92	235.77	248.73	20.368	257.12	275.75	20.37	265.63	313.73	20.368	210.62	244.17	188.11	20.369	227.68	262.28	223.95	20.368	224.08	283.2	20.37	209.29	212.79	20.37	230.73	252.26	276.91	20.369	246.63	226.68	20.366	269.18	237.4	20.367	272.22	302.72	20.367	277.95	241.34
21.068	260.6	235.5	248.73	21.068	257.44	272.32	21.068	265.16	314.11	21.068	208.85	244.66	193.29	21.068	225.29	260.93	221.57	21.068	224.71	284.67	21.068	208.81	212.81	21.068	231.01	254.28	273.83	21.067	246.54	226.59	21.067	269.04	228.18	21.069	271.02	303.31	21.069	278.12	241.53
21.769	260.26	236.08	248.88	21.769	257.5	271.25	21.768	264.56	312.79	21.768	205.71	244.12	188.84	21.768	224.8	260.86	212.31	21.769	224.22	282.75	21.768	209.22	212.84	21.763	231.32	250.62	270.31	21.767	246.6	226.37	21.767	269.18	226.02	21.768	272.65	302.84	21.769	278.23	241.86
22.469	287.58	237.01	249.44	22.469	257.27	271.65	22.468	264.49	314.17	22.468	209.68	244.07	183.48	22.468	223.75	260.84	208.68	22.469	224.26	285.25	22.468	208.8	212.64	22.467	230.65	246.59	269.84	22.468	247.46	226.94	22.467	269.37	225.42	22.47	273.8	311.43	22.468	277.52	243.23
23.167	268.75	236.66	249.59	23.168	257.35	271.42	23.169	265.27	315.08	23.168	208.73	244.56	179.12	23.168	223.64	260.84	207.93	23.168	224.42	288.19	23.168	209.37	212.14	23.167	231.28	239.5	269.68	23.164	247.45	226.98	23.167	269.87	226.58	23.168	272.61	310.53	23.169	278.92	243.31
23.869	268.2	237.64	250.08	23.87	256.96	271.88	23.868	265.26	311.1	23.867	209.67	244.38	177.81	23.868	223.39	263.84	207.79	23.868	225.67	286.56	23.868	208.68	211.11	23.868	230.61	237.3	269.19	23.868	247.12	226.61	23.867	269.58	226.49	23.87	272.02	307.13	23.869	285.02	243.8
24.569	278.58	237.46	249.92	24.568	256.58	271.27	24.568	264.91	312.21	24.567	210.46	244.25	179	24.567	223.94	269.86	207.33	24.568	229.59	285.68	24.57	208.9	212.16	24.568	230.92	238.15	269.82	24.568	246.82	228.13	24.567	270.31	227.62	24.57	272.64	307.43	24.568	284.21	243.59
25.269	275.73	238.92	251.15	25.267	257.1	277.99	25.268	264.78	313.89	25.269	210.84	244.58	178.69	25.267	223.63	265.38	207.51	25.268	235.62	284.7	25.268	209.23	212.9	25.267	231	246.06	270.41	25.268	247.18	240.18	25.268	270.16	226.83	25.268	271.84	309.37	25.268	276.22	243.96
25.969	275.17	249.54	251	25.969	264.32	269.84	25.968	265.01	315.28	25.967	211.2	244.72	178.31	25.968	223.73	259.56	207.99	25.968	230.41	285.17	25.969	209.33	212.99	25.967	230.35	242.43	270.16	25.968	247.07	239.83	25.966	270.8	227.57	25.97	273.02	307	25.969	265.58	244.54
26.668	269.43	248.37	250.96	26.668	267.65	271.77	26.668	265.1	314.34	26.669	208.79	244.51	179.87	26.668	226.24	260.59	207.78	26.668	225.43	284.68	26.666	208.91	212.33	26.667	230.93	242.08	270.44	26.668	259.2	232.79	26.669	271.49	229.59	26.667	272.38	303.63	26.669	267.84	244.07
27.368	270.4	240.45	251.2	27.367	262.78	272.3	27.368	264.11	314.32	27.368	208.41	244.66	180.88	27.368	229.39	261.01	221.82	27.368	224.48	282.72	27.365	209.27	212.53	27.368	231.14	239.35	270.81	27.368	252.35	223.57	27.366	271.44	230.27	27.367	272.41	302.36	27.369	270.2	244.54
28.068	266.15	238.68	254.35	28.068	256.48	271.62	28.067	264.43	313.21	28.068	208.45	247.52	179.18	28.068	230.36	261.29	224.24	28.069	224.07	283.33	28.069	209.37	212.35	28.067	231.29	239.16	270.57	28.068	248.59	221.78	28.066	271.37	229.39	28.067	271.72	302.12	28.069	272.91	244.64
28.768	266.38	238.63	252.69	28.767	255.91	271.52	28.767	267.35	313.72	28.768	210.78	248.27	181.37	28.768	228.36	261.09	223.58	28.769	224.11	282.62	28.767	209.17	212.76	28.767	230.97	240.23	270.99	28.768	247.25	221.25	28.769	271.56	230.27	28.767	272.59	302.67	28.768	273.89	244.65
29.47	263.05	238.83	249.46	29.467	255.98	271.81	29.469	288.43	313.36	29.467	212.32	248.26	183.01	29.468	227.05	260.19	216.22	29.469	223.47	282.53	29.467	209.09	211.82	29.467	230.69	240.19	270.64	29.468	247.28	222.72	29.468	271.45	229.01	29.467	273.1	302.41	29.468	273.94	244.79
30.169	264.66	238.83	249.5	30.167	256.56	271.73	30.169	285.65	312.83	30.167	212.02	244.79	181.36	30.168	225.14	260.18	209.48	30.169	223.22	281.92	30.168	209	212.39	30.167	230.66	241.06	271.21	30.168	245.64	223.67	30.168	271.4	232.05	30.167	277.23	303.09	30.17	274.95	244.25
30.869	267.08	238.05	248.06	30.867	256.45	272.12	30.867	272.16	312.97	30.867	211.43	240.46	181.56	30.868	224.39	262.85	208.23	30.869	224.51	284.36	30.866	209.41	212.2	30.867	230.44	241.97	271.6	30.868	244.98	223.74	30.867	271.56	230.74	30.868	287.97	302.38	30.868	275.28	243.43
31.568	265.64	238.76	248.53	31.567	256.73	271.59	31.569	266.61	313.3	31.567	210.83	239.84	179.32	31.568	224.67	261.28	208.25	31.569	224.77	288.42	31.568	209.1	216.08	31.567	230.48	242.37	271.86	31.569	245.19	222.9	31.567	271.95	231.73	31.569	287.43	303.03	31.568	275.64	243.7
32.27	267.3	238.14	248.09	32.268	256.39	271.7	32.269	265.85	315.62	32.269	210.71	239.74	180.69	32.267	224.73	260.78	208.06	32.268	227.76	286.26	32.267	209.79	222.15	32.267	230.21	242.98	271.67	32.269	245.13	224.19	32.269	271.9	233.18	32.268	279.21	302.41	32.268	275.7	244.71
32.969	267.52	239.27	249.84	32.968	256.38	271.9	32.968	265.91	314.24	32.967	208.77	241.2	181.27	32.967	224.93	260.03	208.24	32.967	227.19	287.23	32.964	209.27	223.46	32.967	229.98	243.25	271.92	32.968	245.06	224.34	32.967	272.91	233.38	32.968	281.58	302.77	32.967	277.02	244.35
33.669	267.16	239.29	250.28	33.669	256.43	271.73	33.669	266.25	312.48	33.667	206.4	242.89	180.5	33.668	224.6	260.49	208.04	33.667	224.72	287.04	33.668	214.8	222.68	33.668	230.41	243.07	271.97	33.668	245.6	223.97	33.669	272.56	232.55	33.668	276.31	302.2	33.667	276.95	244.33
34.369	265.34	240.1	250.2	34.369	257.3	271.73	34.37	266.05	313.11	34.367	207.85	243.36	180.98	34.367	224.69	260.78	208.21	34.367	224.55	284.75	34.368	210.69	221.81	34.368	230.83	243.53	271.1	34.368	244.81	232.77	34.368	273.82	233.21	34.368	270.35	302.48	34.368	277.6	244.07
35.069	269.27	240.55	250.44	35.068	257.24	271.68	35.069	266.61	312.79	35.067	208.79	243.92	180.26	35.068	224.18	260.84	208.94	35.067	223.39	285.02	35.068	208.87	221.26	35.068	230.66	243.82	271.38	35.07	245.38	238.95	35.068	273.14	233.27	35.068	271.71	302.75	35.068	277.26	244.16
35.769	266.32	239.99	250.27	35.768	256.56	271.44	35.765	265.44	313.69	35.768	210.32	244.53	179.34	35.768	227.19	261.09	208.14	35.767	223.02	283.8	35.769	209.64	217.93	35.769	229.78	244.56	272.19	35.768	245.28	234.54	35.768	272.82	233.49	35.768	270.11	302.34	35.768	277.6	244.28
36.467	272.35	240.69	250.62	36.467	256.79	271.71	36.469	265.99	312.26	36.468	211.37	244.79	179.54	36.467	229.88	260.79	208.12	36.467	223.62	283.18	36.465	207.8	216.73	36.468	230.45	244.17	271.67	36.47	245.44	226.8	36.467	273.75	233.91	36.467	269.84	301.71	36.467	277.8	244.48
37.168	270.2	240.44	250.87	37.168	257.34	271.57	37.167	265.76	311.61	37.168	211.16	244.4	180.52	37.169	228.67	265.93	208.21	37.168	222.87	283.05	37.167	207.23	217.46	37.169	230.11	244.39	271.76	37.168	246.07	223.32	37.168	273.12	234.52	37.167	271.43	309.67	37.167	277.97	244.59
37.868	268.65	241.11	251.86	37.867	256.86	271.79	37.869	265.74	313.46	37.868	210.14	244.62	180.87	37.869	226.61	264.31	207.88	37.868	223.64	281.82	37.868	206.96	216.03	37.869	230.52	244.49	271	37.87	246.2	222.66	37.868	273.48	233.2	37.868	271.66	308.5	37.868	278.17	251.49
38.568	269.32	241.69	251.94	38.57	256.96	271.87	38.569	265.39	312.77	38.567	209.13	244.71	180.93	38.567	225.98	261.15	207.76	38.569	223.63	282.46	38.568	207.01	212.17	38.568	229.84	244.21	271.59	38.569	245.48	223.42	38.568	273.59	235.18	38.568	271.97	306	38.568	278.72	258.3
39.268	269.8	241.26	251.86	39.269	256.94	270.92	39.269	265.64	313.01	39.269	209.37	244.49	179.9	39.269	224.68	260.95	207.7	39.27	223.2	281.21	39.269	206.87	208.04	39.269	230.03	243.78	271.13	39.269	246.55	224.16	39.268	273.24	235.14	39.268	273.26	301.32	39.267	278.37	255.87
39.968	279.76	241.79	252.48	39.97	260.01	271.24	39.968	265.61	312.06	39.968	208.61	244.76	187.17	39.967	224.71	260.38	217.2	39.97	223.95	282.96	39.968	206.41	207.05	39.969	229.58	243.94	271.86	39.967	246.24	224.38	39.967	278.76	235.05	39.968	271.13	301.08	39.967	278.15	251.14
40.669	276.81	252.7	252.46	40.668	266.43	270.69	40.668	265.66	311.85	40.667	210.64	245.09	188.04	40.669	224.1	259.84	223.66	40.67	227.54	288.18	40.668	207.01	206.91	40.669	229.09	244.98	271.58	40.669	246.06	224.69	40.667	282.64	235.84	40.668	272.58	298.72	40.667	279.01	244.97
41.367	266.99	248.29	253.52	41.37	267.46	270.13	41.368	283.74	309.38	41.368	209.52	245.93	191.5	41.369	224.35	259.72	223.8	41.368	231.39	285.94	41.369	207.49	207.41	41.369	230.67	244.54	272.04	41.367	249.76	225.87	41.367	277.61	236.97	41.368	272.79	303.98	41.369	278.39	242.21
42.068	286.14	245.16	253.01	42.068	267.07	270.25	42.068	287.93	310.59	42.07	209.98	247.54	189.52	42.068	223.68	259.94	220.65	42.068	227.44	286.29	42.069	207.78	207.73	42.069	231.15	244.89	272.11	42.069	253.01	225.39	42.067	275.57	237.33	42.068	278.87	301.95	42.067	276.65	240.95
42.769	278.88	242.06	253.87	42.77	256.68	270.3	42.768	273.58	312.36	42.767	210.29	249.03	184.08	42.768	224.22	260.02	212.36	42.769	225.17	285.03	42.768	207.12	207.34	42.769	239.19	244.5	279.84	42.767	249.47	225.39	42.768	271.86	263.48	42.768	284.3	300.38	42.767	278.57	241.27
43.469	266.7	241.43	254.27	43.47	254.9	276.13	43.469	266.58	312.42	43.468	209.8	244.93	181.35	43.468	223.5	260.11	209.19	43.469	223.48	284.17	43.469	207.3	207.63	43.469	257.82	244.17	274.02	43.467	248.8	230.44	43.468	270.75	260.38	43.468	278.89	301.16	43.468	277.75	241.18
44.167	268.58	241.22	253.76	44.169	255.09	281.88	44.169	266.13	305.15	44.17	211.91	241.32	178.41	44.168	223.66	263.39	208.11	44.169	223.39	284.29	44.169	207.13	207.78	44.168	254.34	244.33	272.83	44.169	244.88	238.62	44.168	269.54	251.02	44.168	272.77	301.16	44.168	277.47	242.36
44.869	270.3	240.72	254.3	44.871	255.65	272.12	44.868	266.86	320.49	44.868	210.03	239.81	177.2	44.868	223.81	267.17	208.01	44.868	222.78	282.89	44.869	207.71	208.07	44.87	241.42	244.05	271.9	44.868	244.86	237.92	44.867	269.45	246.71	44.868	271.97	301.88	44.867	277.91	242.99
45.567	270.01	241.33	254.67	45.569	255.94	273.45	45.569	267.09	329.44	45.569	209.92	241.08	176.71	45.568	228	264.81	208.27	45.568	223.11	284.37	45.569	208.04	208.87	45.57	233.05	244.09	269.71	45.567	245.4	229.62	45.567	270.1	246.21	45.569	271.08	308.61	45.567	281.77	243.71
46.269	269.79	240.94	254.72	46.269	256.26	271.03	46.269	267.29	322.08	46.267	210.96	242.07	178.19	46.268	230.69	261.75	207.64	46.269	223.24	283.75	46.269	207.7	209.59	46.27	230.81	253.94	268.75	46.268	246.52	224.07	46.268	270.85	241	46.269	271.44	312.59	46.267	285.1	244.78
46.969	272.3	241.8	254.31	46.967	256.78	271.65	46.969	267	313.71	46.97	205.27	243.35	177.88	46.969	229.86	261.78	208.31	46.969	223.03	286.39	46.969	207.95	210.15	46.968	230.15	256.15	269.34	46.968	245.82	223.13	46.968	271.46	236.3	46.968	271.06	307.42	46.967	275.24	245.26
47.668	271.76	241.64	258.06	47.668	256.62	271.65	47.667	266.79	311.5	47.668	212.52	242.99	178.72	47.667	228.07	261.24	222.28	47.67	222.9	283.33	47.669	207.97	209.66	47.668	229.81	253.6	268.82	47.668	245.1	223	47.667	272.7	228.25	47.669	270.96	304	47.667	272.16	244.92
48.37	273.13	242.36	257.3	48.368	256.97	271.3	48.369	266.65	310.71	48.368	207.47	244.48	178.52	48.368	226.86	260.59	224.72	48.37	224.36	283.28	48.37	208.32	209.55	48.368	229.88	242.93	268.96	48.368	245.57	222.41	48.367	272.81	221.1	48.368	270.8	304.62	48.368	269.04	245.08
49.067	273.23	242.13	252.08	49.069	257.09	271.68	49.069	266.61	311.12	49.069	206.62	243.91	180.53	49.068	224.63	260.67	220.11	49.069	227.47	284.82	49.069	208.38	210.73	49.068	230.14	238.86	268.6	49.068	245.53	223.36	49.067	274.17	216.14	49.068	272.11	304.38	49.067	268.77	245.27
49.769	272.75	243.3	252.47	49.768	257.08	271.26	49.769	266.92	310.11	49.769	209.79	244.53	180.08	49.768	224.4	260.03	210.57	49.769	228.52	282.92	49.769	208.52	210.73	49.769	229.96	238.79	269.23	49.768	245.98	223.56	49.767	273.84	217.96	49.768	272.15	302.85	49.768	270.67	245.35
50.469	274.32	242.69	252.72	50.469	256.65	270.76	50.469	266.57	312.18	50.467	210.93	244.92	182.04	50.468	224.11	261.37	208.33	50.469	226.38	284.03	50.469	208.12	210.77	50.469	229.57	240.19	269.35	50.467	245.81	224.69	50.467	273.98	216.13	50.468	273.03	302.74	50.468	271.64	245.31
51.169	275.87	242.86	254.35	51.167	257.57	270.49	51.167	266.17	311.59	51.168	211.5	244.48	182.92	51.168	224.1	260.42	208.19	51.171	223.9	284.04	51.167	208.54	210.68	51.169	230.21	240.91	270.15	51.169	245.53	224.95	51.169	274.37	216.06	51.166	272.64	302.91	51.168	272.27	245.53
51.869	274.93	244.08	251.78	51.869	256.78	270.54	51.869	265.98	312.06	51.869	210.77	245.33	182.72	51.87	224.37	260.15	208.86	51.869	223.26	282.43	51.867	208.3	210.4	51.869	229.31	241.47	270.67	51.868	245.4	225.79	51.869	273.82	217.71	51.868	272.28	302.03	51.868	272.69	245.07
52.564	273.96	243.84	253.26	52.569	256.87	271.15	52.567	265.44	312.56	52.569	212.12	245.52	181.41	52.568	224.22	260.45	208.81	52.569	222.68	282.78	52.57	208.37	210.28	52.569	229.12	242.53	270.21	52.568	245.9	226.01	52.569	274	222.65	52.566	273.67	301.83	52.568	274.79	244.95
53.269	281.23	244.52	252.7	53.269	256.9	270.88	53.269	265.88	311.7	53.269	211.25	245.13	181.01	53.268	226.36	259.85	208.88	53.268	222.9	283.07	53.268	209.9	210.36	53.269	229.39	242.69	270.09	53.268	245.87	225.95	53.269	273.45	224.52	53.268	273.44	302.01	53.268	274.89	244.52
53.968	281.99	244.79	253.33	53.969	256.68	270.79	53.969	265.13	313.32	53.969	211.4	245.79	179.85	53.969	225.97	260.11	208.29	53.968	223.1	281.48	53.967	214.37	210.21	53.969	229.03	244.15	270.8	53.968	245.61	234.74	53.967	274.38	224.91	53.969	272.52	302.64	53.968	276.57	245.19
54.668	277.9	244.9	253.65	54.669	256.65	271.62	54.669	265.11	315.91	54.669	210.33	245.79	180.62	54.669	227.14	260.16	208.22	54.669	224.71	283.99	54.667	209.55	210.17	54.67	229.31	244.25	270.72	54.67	245.91	238.3	54.669	273.42	224.86	54.667	271.9	302.55	54.666	276.91	243.78
55.368	273.93	244.92	254.49	55.369	256.45	270.96	55.368	265.23	316.02	55.368	207.29	248.13	180	55.369	227.15	260.04	220.38	55.369	226.89	282.8	55.367	208.09	208.94	55.37	229.73	244.91	276.53	55.37	246.28	236.06	55.369	274.57	226.87	55.367	272.15	302.58	55.367	275.82	243.78
56.064	273.25	245.82	255.03	56.069	258.75	271.86	56.068	264.48	314.84	56.069	208.51	250.46	179.07	56.069	224.82	264.75	221.92	56.069	225.3	284.24	56.067	206.91	209.17	56.068	228.81	243.96	275.84	56.068	245.98	226.92	56.069	273.76	227.46	56.068	271.78	302.9	56.067	276.1	244.33
56.768	270.77	246.08	255.7	56.769	264.48	271.59	56.767	278.64	312.69	56.768	208	247.78	180.81	56.769	224.58	270.38	223.5	56.769	224.33	286.62	56.767	207.38	209.97	56.768	230.39	244.58	275.25	56.767	245.43	223.77	56.768	275.09	229.11	56.767	271.85	302.07	56.768	276.29	243.89
57.468	290.39	246.53	256.29	57.469	265.64	271.61	57.467	286.62	312.92	57.468	207.11	241.75	194.69	57.468	224.1	265.86	216.41	57.469	223.6	286.69	57.469	205.95	212.55	57.468	228.87	245	272.62	57.469	245.78	221.98	57.469	274.75	229.73	57.469	271.31	302.49	57.466	277.43	244.47
58.168	298.4	256.81	256.89	58.169	267.69	271.08	58.167	281.23	315.74	58.168	209.68	239.71	192.63	58.168	223.74	265.82	210.23	58.169	222.97	285.16	58.168	205.93	218.39	58.17	229.18	245.24	271.43	58.167	245.91	221.7	58.168	274.94	230.83	58.169	272.07	302.91	58.167	277.35	243.54
58.868	285.45	252.85	257	58.869	261.69	271.56	58.869	270.56	314.91	58.868	209.74	240.47	191.05	58.867	224.9	263.22	208.63	58.868	222.38	284.31	58.868	205.99	212.38	58.868	229.67	245.46	270.32	58.869	245.99	222.51	58.867	275.07	230.73	58.87	272.37	302.67	58.867	276.6	243.07
59.565	284.47	252.48	256.96	59.568	255.44	271.23	59.569	265.19	310.68	59.568	212.25	240.71	184.44	59.567	226.67	261.15	208.51	59.569	222.75	283.84	59.568	206.1	208.55	59.569	229.06	245.25	270.99	59.567	246.15	222.46	59.567	275.08	231.51	59.569	272.72	303.15	59.566	277.63	243.23
60.267	279.56	247.16	257.84	60.269	256.44	271.05	60.269	265.23	311.98	60.268	210.31	241.62	181.75	60.267	226.85	260.93	208.29	60.269	222.57	283.24	60.269	205.48	209.08	60.269	228.97	245.1	270.69	60.267	246.67	223.29	60.267	276.01	231.99	60.269	272.54	302.36	60.269	277.13	242.57
60.969	276.85	244.8	258.03	60.97	255.84	273.84	60.968	265.86	311.82	60.968	211.02	242.84	178.21	60.967	226.56	261.4	207.83	60.97	223.16	282.65	60.969	206.7	209.78	60.968	229.56	246.07	270.39	60.968	246.36	223.46	60.967	275.29	231.99	60.969	272.74	302.22	60.967	277.2	243.77
61.669	272.81	245.29	258.47	61.668	255.73	276.3	61.668	265.25	312.99	61.668	210.52	243.15	177.87	61.668	225.81	261.45	208.15	61.668	223.74	282.31	61.667	206.03	206.54	61.668	228.97	245.72	270.07	61.668	256.78	224.6	61.667	275.99	232.21	61.669	272.27	301.6	61.668	282.62	243.03
62.369	272.84	245.37	258.45	62.368	256.19	276.86	62.369	265.72	313.94	62.369	205.64	243.37	176.94	62.368	224.51	261.53	208.47	62.37	229.48	285.99	62.369	207.16	209.24	62.368	228.64	245.88	270.82	62.367	250.46	224.31	62.367	275.49	233.64	62.369	274.45	302.31	62.368	279.93	243.04
63.065	287.86	245.35	259.17	63.068	256.31	269.23	63.069	266.14	313.03	63.068	207.62	243.68	178.34	63.069	224.67	263.53	208.48	63.068	228.42	287.69	63.067	207.21	208.8	63.068	229.8	245.9	273.55	63.067	250.95	225.34	63.068	275.46	234.6	63.069	273.27	302.43	63.068	273.05	242.7
63.768	282.45	245.9	259.26	63.77	256.28	269.88	63.769	265.8	317.14	63.768	205.86	243.87	178.19	63.768	224.05	261.32	208.16	63.769	223.71	288.9	63.767	207.24	210.07	63.769	229.35	246.24	273.16	63.767	245.61	226.21	63.767	275.74	233.68	63.769	271.8	302.4	63.768	266.52	242.47
64.469	288.09	246.61	259.21	64.47	256.65	270.17	64.469	265.33	315.44	64.468	208.39	244.21	177.36	64.469	224.8	261.29	208.4	64.469	222.85	287.42	64.468	207.28	209.09	64.467	228.77	245.8	277.23	64.467	246.68	225.94	64.467	276.28	234.25	64.47	272.68	303.38	64.469	265.31	241.47
65.17	282.08	247.29	261.98	65.17	256.38	270.81	65.169	265.57	314.09	65.168	205.55	244	177.52	65.167	226.59	261.27	208.13	65.169	222.34	285.49	65.168	207.72	208.66	65.168	229.53	246.02	274.79	65.167	244.69	225.54	65.167	275.96	235.03	65.169	270.21	303.19	65.167	267.68	242.11
65.868	275.48	247.73	261.36	65.869	256.28	271.38	65.868	266.16	314.84	65.867	206.88	244.48	178.78	65.867	227.29	261.59	208.29	65.869	222.64	284.44	65.868	208.1	210.55	65.868	230.34	245.54	273.84	65.868	245.2	225.71	65.867	275.7	234.95	65.869	271.71	303.58	65.87	270.36	241.51
66.57	276.68	247.86	260.63	66.568	256.28	272.11	66.567	266.26	312.63	66.567	211.15	243.83	179.28	66.567	226.24	260.7	217.55	66.568	222.76	283.76	66.568	207.16	208.11	66.567	228.83	246.35	271.55	66.567	246.31	226.01	66.567	275.63	235.52	66.568	271.36	303.24	66.569	271.19	241.24
67.268	276.82	248.93	258.7	67.268	256.78	271.51	67.269	265.54	312.42	67.267	212.49	244.55	178.17	67.269	224.58	260.22	223.79	67.269	224.52	284.62	67.27	207.23	210.33	67.269	228.98	245.95	270.96	67.267	245.52	226.23	67.267	276.52	234.5	67.268	271.43	303.74	67.269	271.3	241.13
67.968	277.02	249.76	257.3	67.968	256.33	271.25	67.967	265.98	313.1	67.963	211.28	247	178.11	67.968	224.2	260.5	223.88	67.971	224.17	283.94	67.968	207.33	210.24	67.967	229.38	245.89	271.36	67.967	245.85	226.23	67.967	276.07	234.22	67.969	271.34	303.31	67.969	272.42	241.12
68.668	278.95	249.97	257.38	68.668	256.66	271.06	68.669	266.31	312.27	68.667	210.64	247.7	179.16	68.668	223.51	259.67	218.82	68.668	224.6	284.92	68.669	207.76	209.67	68.667	229.03	245.93	271.13	68.669	246.58	226.91	68.667	275.8	235.61	68.671	271.55	315.15	68.669	273.35	240.99
69.368	281.75	250.6	257.81	69.368	256.89	270.97	69.367	265.75	314.1	69.367	211.15	243.01	189.6	69.367	223.82	264.89	211.12	69.368	225.5	286.35	69.369	208.19	210.21	69.369	229.22	245.51	270.82	69.369	245.39	226.57	69.369	275.65	236.26	69.368	270.69	309.26	69.368	275.18	241.48
70.069	282.48	250.39	258.03	70.067	257.32	271.41	70.068	265.44	312.91	70.067	210.88	240.56	192.11	70.068	222.95	263.56	209.46	70.069	223.7	286.23	70.069	207.44	211.56	70.068	232.53	245.9	270.18	70.067	245.77	226.59	70.067	275.72	237.01	70.068	271.56	300.11	70.068	275.05	241.98
70.769	281.07	251.69	258.6	70.768	256.5	271.05	70.764	265.43	312.51	70.767	209.21	240.02	196.34	70.768	223.07	262.65	208.41	70.77	223.18	285.36	70.768	207.14	212.19	70.769	254.2	251.29	270.34	70.767	245.68	226.21	70.767	276	237.24	70.768	270.99	300.88	70.769	275.02	255.73
71.467	282.62	252.1	259.15	71.467	256.84	271.45	71.467	266.2	311.38	71.467	210.5	241.02	191.76	71.468	222.94	261.45	208.54	71.469	222.82	287.86	71.468	208.14	210.13	71.468	257.98	252.6	269.97	71.468	245.91	226.67	71.467	276.35	237.36	71.468	271.71	296.61	71.468	275.76	258.36
72.169	282.7	252.34	259.73	72.168	256.44	274.74	72.167	265.36	309.87	72.169	209.77	241.45	190.79	72.168	222.99	261.21	208	72.169	222.82	287.41	72.169	207.9	209.95	72.168	245.18	246.41	270.34	72.168	246.14	226.12	72.169	276.31	236.62	72.168	271.5	295.67	72.169	276.69	255.76
72.869	282.73	252.63	260.56	72.87	256.81	272.76	72.868	265.59	312.08	72.869	210.03	242.09	190.18	72.868	223.18	260.52	208.36	72.869	222.84	284.92	72.867	207.4	209.2	72.868	233.75	241.21	270.19	72.867	246.16	226.61	72.867	276.02	237.46	72.868	270.91	297.52	72.869	276.86	249.25
73.569	284.84	253.11	261.4	73.568	256.92	271.39	73.568	265.36	313.16	73.569	210.63	243.29	183.63	73.569	227.09	259.52	208.19	73.569	222.66	283.65	73.568	207.58	209.94	73.568	230.76	237.38	270.64	73.569	246.22	238.24	73.569	275.85	248.42	73.568	271.06	298.68	73.569	276.94	242.17
74.267	285.49	253.75	262.01	74.268	256.14	271.36	74.269	264.76	307.65	74.267	210.49	243.2	180.48	74.268	227.37	259.47	207.93	74.268	222.79	283.11	74.268	207.59	209.51	74.268	230.28	237.26	270.6	74.268	246.03	239.08	74.268	276.31	269.84	74.268	280.32	299.9	74.267	276.53	240.71
74.968	285.23	253.47	262.17	74.968	256.12	271.36	74.968	264.77	314.02	74.969	211.98	242.8	176.55	74.967	227.69	260.06	209.73	74.968	223.25	282.83	74.969	207.49	209.35	74.968	229.18	238.82	274.13	74.969	246.75	233.01	74.968	276.79	265.03	74.967	289.24	300.23	74.968	276.83	239.28
75.669	281.58	254.74	262.71	75.669	255.76	271.84	75.668	265.5	310.76	75.667	209.9	242.59	175.07	75.669	225.88	264.04	215.81	75.667	225.38	281.76	75.669	207.59	209.63	75.669	228.44	238.9	276.42	75.668	246.45	225.21	75.668	276.82	259.99	75.667	287.39	300.93	75.668	277.05	240.29
76.369	285.11	254.98	263.34	76.369	256.8	271.49	76.369	264.77	310.67	76.368	211.97	243.24	175.53	76.367	224.19	264.54	222.67	76.367	231.93	284.51	76.368	207.42	209.69	76.367	228.97	239.99	272.48	76.369	246.57	221.68	76.368	286.1	252.71	76.369	279.74	300.59	76.367	279.58	240.4
77.069	284.65	254.95	263.3	77.069	263.98	271.54	77.068	264.73	311.06	77.068	206.36	243.59	176.25	77.069	223.73	261.07	223.49	77.068	226.93	284	77.068	207.14	210.05	77.068	229.16	241.19	271.87	77.067	245.69	222.45	77.068	278.97	244.27	77.069	273.09	301.42	77.068	282.82	241.48
77.767	284.91	255.86	264.01	77.767	267.01	271.92	77.769	264.46	310.06	77.767	214.4	243.47	175.75	77.767	223.79	261.52	218.93	77.768	223.04	285.11	77.768	207.31	209.99	77.768	229.14	241.24	270.92	77.769	246.34	221.36	77.768	277.12	238.93	77.769	272.13	300.81	77.767	274.62	242.1
78.469	297.85	255.76	264.29	78.469	266.56	271.77	78.469	264.07	310.03	78.47	214.96	243.62	176.28	78.469	223.58	260.4	210.47	78.468	222.35	285.13	78.468	207.67	209.23	78.468	228.4	241.85	271.17	78.467	246.04	222.27	78.466	274.35	236.73	78.467	270.31	305.02	78.469	266.44	242.51
79.17	302.87	264.9	265.66	79.169	266.99	271.85	79.169	264.44	310.62	79.167	211.34	244.37	175.84	79.169	223.63	260.77	208.29	79.167	223.12	283.29	79.168	206.35	209.65	79.168	228.75	242.42	274.23	79.169	245.29	222.55	79.166	272.3	236.55	79.168	269.84	309.44	79.167	268.68	242.09
79.868	294.94	262.95	265.4	79.869	257.4	271.13	79.869	263.96	311.62	79.869	204.52	243.93	177.1	79.868	222.72	260.6	207.92	79.869	222.99	281.93	79.868	207.22	210.14	79.87	227.8	242.57	274.21	79.871	245.4	222.75	79.867	272.04	240.71	79.868	269.85	305.15	79.867	269.33	242.78
80.569	301.52	260.32	265.82	80.569	253.87	270.94	80.569	262.71	311.15	80.569	201.27	248.52	175.56	80.566	224.09	259.66	207.9	80.568	222.09	282.55	80.568	207.1	209.77	80.568	228.7	243.35	272.37	80.568	246.26	224.62	80.566	273.26	232.51	80.57	271.95	303.19	80.567	271.32	243.25
81.268	293.97	257.56	268.72	81.27	255.25	271.12	81.269	262.55	311.46	81.269	204.07	248.82	176.95	81.268	228.21	260.18	208.22	81.268	222.16	280.5	81.268	206.96	210.07	81.268	228.66	243.81	271.7	81.27	246.23	224.61	81.268	273.09	227.57	81.267	271.29	300.92	81.268	272.15	243.03
81.968	292.18	256.65	267.31	81.97	254.9	270.65	81.968	263.06	310.96	81.969	203.19	247.18	179.5	81.968	228.37	259.72	207.85	81.968	222.45	281.55	81.968	207.58	209.8	81.969	228.39	243.3	270.8	81.968	246.08	224.75	81.967	274.3	222.21	81.969	271.86	300.98	81.968	273.31	243.11
82.668	289.94	256.08	261.72	82.669	255.43	270.31	82.67	264.38	310.9	82.669	203.58	241.99	181.72	82.668	226.6	260.51	208.07	82.669	224.53	279.91	82.668	207.29	210	82.67	228.15	243.78	271.28	82.67	245.46	225.3	82.667	273.35	218.67	82.669	272.62	301.73	82.667	273.81	243.15
83.368	286.91	255.78	263.8	83.37	256.43	271.32	83.371	263.93	309.91	83.368	205.58	239.49	182.52	83.368	224.5	265.99	207.7	83.367	227.09	280.43	83.368	207.38	209.2	83.37	227.83	244.08	271.31	83.367	246	225.45	83.366	274.7	219.07	83.367	272.49	301.55	83.367	275.18	244.22
84.068	285.51	255.49	265.22	84.068	256.38	280.28	84.069	263.86	308.89	84.068	206.82	239.78	179.42	84.068	223.39	264.53	208.06	84.069	227.54	283.39	84.067	207.01	209.45	84.068	227.85	242.99	270.94	84.067	245.74	225.27	84.066	273.64	219.9	84.068	273.11	301.76	84.069	274.3	243.77
84.768	285.21	256.52	265.47	84.77	256.44	276.29	84.771	262.92	312.21	84.769	208.2	240.34	179.19	84.768	222.98	261.91	220.92	84.769	223.67	287.42	84.768	207.2	209.61	84.768	228.13	243.65	270.59	84.767	245.37	226.16	84.768	274.99	220.72	84.768	272.19	302.04	84.767	275.58	243.9
85.468	285.21	257.34	265.06	85.468	256.95	272.15	85.469	262.53	313.43	85.469	208.76	241.58	178.51	85.468	222.51	260.61	221.38	85.469	222.23	286.8	85.468	206.41	209.73	85.468	227.97	243.27	271.37	85.469	245.46	225.97	85.467	274.2	221.85	85.468	273.4	301.36	85.469	275.68	243.49
86.168	285.02	258.2	265.9	86.168	256.66	271.72	86.169	262.34	314.78	86.169	209.31	241.55	178.63	86.167	222.86	260.05	219.99	86.17	221.23	285.83	86.168	207.39	209.54	86.169	227.97	243.58	271.23	86.167	245.79	225.89	86.167	274.79	225.28	86.168	273.68	302	86.167	275.89	242.96
86.869	284.45	258.91	266.18	86.87	256.74	270.79	86.869	262.09	301.88	86.867	210.06	242.03	177.8	86.867	222.91	259.88	213.02	86.868	222.07	283.96	86.868	206.83	209.97	86.867	228.09	244.06	270.99	86.867	245.63	225.87	86.867	274.66	225.83	86.868	272.96	301.81	86.868	276.9	242.88
87.569	283.26	258.94	266.9	87.57	256.86	271.72	87.568	262.3	308.1	87.567	207.39	242.35	177.88	87.567	225.41	259.49	210.55	87.569	223.23	283.54	87.568	207.28	207.9	87.568	228.3	244.51	270.72	87.569	244.87	225.69	87.568	274.84	228.5	87.568	273.18	301.12	87.568	276.52	242.58
88.269	289.01	259.35	267.48	88.267	256.41	271.42	88.27	262.19	310.38	88.268	208.21	243.24	179.17	88.269	227.56	259.47	208.47	88.267	222.29	282.4	88.268	207.28	209.03	88.268	226.78	243.9	271.01	88.269	244.86	226.05	88.267	274.83	227.74	88.268	272.71	301.77	88.269	276.17	242.89
88.969	290.2	259.58	267.94	88.967	256.81	271.53	88.969	261.48	310.34	88.97	209.5	243.11	194.45	88.967	228	261.97	207.98	88.969	223.38	282.51	88.97	207.46	209.86	88.968	227.15	243.62	271.06	88.969	245.31	226.83	88.968	275.2	230.9	88.969	272.87	311.16	88.969	275.3	242.44
89.669	287.89	259.99	268.87	89.667	256.67	270.12	89.667	278.56	310.42	89.667	207.2	242.91	193.5	89.667	226.35	258.89	207.31	89.669	224.02	280.99	89.668	206.66	209.78	89.668	227.02	242.9	272.87	89.663	245.28	239.27	89.667	275.38	229.27	89.669	272.57	313.26	89.669	276.14	241.82
90.369	287.02	262.89	269.04	90.369	256.74	270.48	90.367	284.84	310.19	90.367	211.86	243.92	195.14	90.368	225.03	256.52	208.22	90.369	229.87	281.89	90.368	207.08	211.05	90.368	227.81	244.02	273.46	90.369	244.87	238.5	90.367	275.82	231.96	90.37	273.73	308.09	90.367	284.63	242.65
91.069	287.87	270.98	269.92	91.069	256.39	270.31	91.067	281.22	311.51	91.067	209.78	243.48	190.45	91.067	223.55	257.49	207.9	91.068	228.84	284.07	91.067	207.01	214.37	91.068	227.63	243.98	273.57	91.069	245.48	230.74	91.067	275.8	232.4	91.067	272.69	302.64	91.067	274.64	242.01
91.768	286.53	269.94	270.14	91.769	256.64	269.93	91.769	266.28	311.66	91.769	205.09	243.78	187.34	91.768	223.1	259	208.11	91.768	223.46	283.84	91.768	206.87	217.17	91.768	226.8	243.75	278.59	91.769	257.16	223.6	91.768	276.1	232.64	91.768	273.09	303.64	91.769	273.35	246.09
92.469	287.27	262.21	270	92.467	256.07	269.81	92.468	262.55	312.49	92.469	205.2	243.73	188.36	92.469	223.65	258.74	219.23	92.468	221.38	287.78	92.468	206.81	220.44	92.468	227.22	243.92	273.28	92.469	251	222.03	92.469	275.73	233.39	92.468	271.98	303.36	92.468	267.16	255.71
93.169	288.41	261.09	270.13	93.167	255.94	270.51	93.168	261.92	312.14	93.167	204.89	243.51	182.94	93.168	224.93	258.86	222.05	93.169	221.44	284.34	93.168	206.99	223.02	93.168	227.63	244.19	273.1	93.169	247.04	220.93	93.169	275.45	233.59	93.168	272.86	302.38	93.169	267.57	254.36
93.869	289.48	260.01	270.88	93.868	256.33	270.08	93.868	263.13	311.09	93.867	204.99	243.95	178.98	93.868	225.41	259.51	221.97	93.869	221.65	283.77	93.868	206.44	220.51	93.868	225.95	243.78	271.26	93.87	247.24	221.59	93.867	275.19	233.5	93.868	272.81	300.84	93.868	268.6	249.1
94.569	288.89	260.34	271.36	94.569	256.32	269.68	94.57	263.78	311.14	94.567	206.39	242.24	178.08	94.569	225.28	258.93	215.57	94.572	222.09	284.85	94.568	208.67	218	94.568	226.49	244.11	269.97	94.568	245.39	222.44	94.569	276.09	234.24	94.568	272.82	300.74	94.568	270.45	242.15
95.269	286.37	259.71	271.81	95.268	256.25	271.2	95.268	263.65	311	95.268	209.18	242.09	176.48	95.268	224.03	258.9	208.85	95.268	225.94	283.89	95.268	214.55	215.82	95.269	227.22	244.31	269.58	95.269	244.81	222.68	95.269	275.32	233.78	95.268	272.29	301.39	95.268	271.51	240.34
95.969	289.08	260.08	272.05	95.968	256.4	279.38	95.968	263.56	312.71	95.968	209.77	243.7	176.51	95.967	223.43	263.54	208.58	95.968	226.06	283.01	95.967	210.29	213.86	95.968	227.32	243.97	269.53	95.969	244.32	223.16	95.967	275.86	234.94	95.968	272.72	301.83	95.968	272.63	238.98
96.668	288.89	260.3	272.18	96.669	255.74	273.48	96.67	263.54	311.78	96.668	209.06	246.7	177.14	96.668	223.26	266.08	208.02	96.668	225.15	283.74	96.667	206.8	208.95	96.668	227.67	243.91	269.78	96.669	244.22	223.6	96.668	276.41	235.2	96.667	273.31	301.89	96.666	273.39	239.51
97.368	287.67	262.48	273.29	97.368	256.66	271.32	97.368	263.94	310.98	97.368	208.78	247.22	176.67	97.369	223.18	263.49	207.88	97.368	223.93	282.61	97.368	205.66	208.81	97.369	227.84	243.98	269.16	97.369	243.3	223.68	97.368	275.74	236.06	97.368	271.71	302.09	97.368	273.53	241.07
98.069	288.36	262.26	273.14	98.07	256.17	270.83	98.068	263.72	310.11	98.068	209.66	244.7	178.38	98.069	223.15	261.67	207.87	98.068	223.74	282.52	98.067	204.13	205.95	98.068	227.71	243.85	269.68	98.069	244	223.89	98.068	275.61	236.5	98.068	271.88	302.7	98.068	274.7	241.53
98.767	290.35	262.85	273.55	98.768	256.31	271.06	98.768	263.92	311.22	98.768	208.65	239.61	177.07	98.769	222.78	260.39	208.01	98.768	223.24	282.91	98.768	203.33	205.46	98.769	227.24	244.31	269.45	98.769	244.1	223.45	98.768	275.69	236.65	98.768	273.26	303.64	98.767	275.02	241.69
99.469	290.65	262.25	277.53	99.468	255.63	271.36	99.468	279.81	310.82	99.468	208.75	240.05	177.6	99.469	223.28	260.72	207.72	99.469	223.06	285.27	99.467	202.88	205.28	99.471	229.44	244.77	269.27	99.469	244.45	223.86	99.47	276.56	236.16	99.468	283.22	303.05	99.469	276.4	242.4
100.169	288.94	261.42	274.14	100.168	255.7	270.7	100.17	284.57	315.11	100.169	209.08	240.19	178.39	100.167	222.9	259.88	216.91	100.169	226.63	288.76	100.169	203.48	204.62	100.169	254.51	245.98	269.83	100.169	244.43	224.76	100.168	276.84	236.19	100.168	286.89	302.96	100.167	275.45	242.47
100.867	290.19	262.65	273.13	100.868	255.23	271.24	100.87	276.5	313.59	100.868	207.48	240.6	179.49	100.868	227.7	259.08	221.66	100.869	226.38	285.12	100.868	203.86	205.5	100.871	261.85	250.4	273.4	100.868	244.52	224.5	100.868	276.24	237.38	100.868	285.2	302.69	100.867	275.33	242.88
101.568	290.87	263.5	269.56	101.57	255.47	270.99	101.57	266.9	310.39	101.568	207.22	241.58	179.1	101.568	228.24	259.37	222.15	101.569	223.87	284.05	101.568	204.07	205.29	101.569	259.03	248.41	272.84	101.568	243.28	224.97	101.568	277.18	238.43	101.568	278.48	307.22	101.567	276.02	242.43
102.268	307.57	263.89	271.41	102.27	255.2	270.76	102.27	263.23	309.01	102.269	209.32	241.65	180.23	102.269	226.88	259.68	217.74	102.269	222.71	282.76	102.269	204.35	205.71	102.269	255.98	242.16	271.64	102.268	244.59	225.02	102.267	276.88	239.68	102.269	275.32	313.57	102.267	275.49	242.73
102.969	306.47	263.07	271.05	102.968	255.27	274.52	102.969	263.3	308.9	102.966	209	242.76	180.28	102.967	226.62	261.13	211.04	102.969	223.09	283.47	102.97	204.72	206.02	102.969	252.1	237.67	274.14	102.967	244.7	225.67	102.967	276.82	239.26	102.968	272.48	308.17	102.968	275.6	243.79
103.669	303.75	263.89	272.14	103.668	262.59	271.92	103.669	262.89	309.06	103.667	209.71	242.3	182.54	103.669	224.89	266.47	208.55	103.669	223.39	283.04	103.668	204.93	206.7	103.668	238.71	234.4	274.51	103.667	244.71	225.95	103.667	276.42	270.13	103.668	271.09	304.05	103.668	276.77	243.64
104.367	295.56	264.73	272.63	104.368	265.8	271.33	104.368	263.41	310.47	104.368	209.7	242.94	184.21	104.367	223.61	262.45	207.29	104.368	223.58	282.84	104.37	204.77	206.93	104.369	232.61	235.23	272.22	104.368	244.59	226.17	104.367	276.75	254.47	104.368	271.14	302.98	104.367	275.79	242.89
105.067	296.99	264.65	273.46	105.068	266.26	271.49	105.069	264	311.3	105.068	209.72	243.01	185.96	105.068	222.97	257.37	207.09	105.07	223.44	282.25	105.068	205.31	207.92	105.069	229.94	236.79	270.5	105.068	244.64	225.69	105.067	276.76	244.64	105.069	270.53	301.56	105.069	276.78	242.4
105.769	293.08	263.71	273.95	105.77	261.9	271.19	105.769	263.89	308.49	105.768	209.55	243	188.45	105.768	222.89	258.82	207.52	105.768	222.62	282.23	105.768	205.5	207.65	105.769	230.91	238.06	270.43	105.767	245.19	226.09	105.768	277.32	244.23	105.769	270.66	301.64	105.769	275.47	243.1
106.469	294.06	263.42	274.55	106.47	254.78	270.29	106.469	263.82	309.43	106.471	207.04	242.92	190.06	106.468	222.96	259.92	207.36	106.468	226.82	281.34	106.469	205.14	208.09	106.469	229.95	238.95	269.53	106.469	245.42	225.52	106.467	276.85	243.2	106.468	271.78	301.91	106.467	276.16	242.31
107.169	290.09	264.08	275.66	107.169	253.85	270.46	107.165	264.2	310.33	107.169	213.14	242.67	188.65	107.168	223.3	259.57	208.01	107.168	226.67	283.95	107.168	205.48	208.24	107.169	230.39	239.66	270.38	107.169	245.28	225.97	107.167	276.65	241.09	107.168	271.95	302.11	107.167	276.7	242
107.868	291.91	265.14	275.98	107.871	254.18	269.66	107.869	264.66	307.04	107.869	209.51	248.36	183.52	107.867	222.68	259.5	207.38	107.868	224.26	280.84	107.87	205.55	208.6	107.867	230.04	240.92	269.92	107.869	244.97	226.44	107.867	277.45	239.68	107.869	272	302.09	107.868	275.95	242.56
108.569	290.57	265.22	276.41	108.57	254.75	269.98	108.569	264.86	308.82	108.569	208.95	246.98	183.65	108.569	223.17	259.53	208.75	108.57	224	282.94	108.568	205.32	208.22	108.568	230.66	240.94	270.14	108.567	245.08	225.87	108.569	277.03	234.5	108.569	272.1	302.44	108.567	276.23	241.69
109.267	290.52	264.88	276.77	109.27	255.26	270.1	109.269	264.51	309.1	109.269	209.13	245.9	179.32	109.269	226.52	261.64	221.46	109.269	223.57	285.47	109.268	205.46	208.35	109.268	229.63	242.48	270.49	109.267	244.21	225.97	109.267	277.13	232.58	109.269	271.87	301.99	109.267	275.82	241.72
109.967	290.49	265.26	277.7	109.969	255.15	270.37	109.968	263.84	308.81	109.969	210.11	241.29	177.29	109.969	225.65	258.56	222.26	109.969	223.2	284.17	109.97	204.99	209.2	109.969	229.25	242.34	270.51	109.967	244.62	226.16	109.967	276.86	222.79	109.969	271.59	301.57	109.969	275.91	241.79
110.668	288.72	265.07	277.71	110.669	255.25	269.91	110.668	264.85	309.16	110.668	210.23	239.63	176.79	110.667	226.23	258.67	220.6	110.669	222.77	284.41	110.668	205.54	209.23	110.669	228.58	242.63	269.23	110.667	244.48	226.68	110.667	277.11	220.74	110.667	272.33	301.61	110.669	275.26	242.24
111.368	287.49	264.51	278.41	111.369	254.31	269.68	111.368	264.47	310.53	111.368	209.62	239.93	177.24	111.369	226.68	259.8	211.96	111.369	222.88	282.98	111.368	205.01	209.07	111.369	228.74	242.28	270.16	111.367	244.79	226.17	111.367	277.34	220.74	111.367	272.75	302.04	111.367	276.76	241.75
112.069	288.98	264.73	278.72	112.069	254.86	269.37	112.067	264.1	309.6	112.067	211.04	241.39	178.08	112.068	224.81	258.68	208.75	112.069	223.21	282.42	112.068	205.33	209.36	112.069	229.58	242.88	270.79	112.067	244.92	225.57	112.067	277.58	219.28	112.068	272.51	301.58	112.069	275.12	241.85
112.769	290.08	269.81	280.2	112.769	254.43	269.34	112.767	263.91	308.66	112.769	207.44	241.75	178.67	112.768	223.94	259.37	208.2	112.769	222.82	282.09	112.768	205.03	209.48	112.769	228.33	242.13	270.13	112.769	244.73	226.43	112.768	277.7	219.77	112.769	273.02	301.81	112.767	276.11	242.27
113.468	286.49	272.14	279.01	113.469	255.15	269.51	113.469	263.6	309.27	113.467	206.4	241.61	179.55	113.468	223.21	259.03	207.74	113.469	227.5	280.84	113.469	204.93	209.16	113.469	228.09	243.27	269.58	113.467	244.49	226.34	113.468	277.56	219.56	113.468	272.17	301.73	113.469	276.31	254.54
114.168	289.39	269.19	276.41	114.168	255.32	269.15	114.167	263.38	310.2	114.169	204.96	242.28	181.48	114.168	223.59	259.16	207.84	114.17	229.1	279.97	114.169	205.26	209.56	114.169	227.7	242.31	278.18	114.169	245.13	226.33	114.168	277.39	222.11	114.166	272.51	301.74	114.169	275.8	255.37
114.87	287.11	266.39	275.39	114.868	254.44	268.93	114.869	263.46	308.99	114.869	207.16	242.53	180.93	114.868	222.85	265.35	207.68	114.869	224.69	280.77	114.867	205.19	210.23	114.869	227.41	242.86	275.79	114.867	244.62	225.9	114.868	277.39	224.16	114.868	273.94	302.33	114.868	275.68	252.91
115.57	288.67	263.15	276.74	115.569	254.94	268.97	115.568	262.76	308.68	115.569	206.88	242.84	179.73	115.568	223.25	262.97	207.25	115.569	222.94	284.83	115.569	205.15	209.83	115.569	227.28	242.82	270.61	115.569	244.45	226.06	115.568	277.24	227.24	115.568	273.91	301.81	115.567	276.37	245.29
116.268	287.44	262.95	276.84	116.268	254.89	268.61	116.269	263.21	307.78	116.269	207.67	242.56	181.69	116.268	224.02	259.78	208.03	116.27	223.13	286.44	116.267	204.88	208.65	116.269	227.96	242.31	267.91	116.269	244.59	226.34	116.267	277.14	229.19	116.268	273.81	301.38	116.267	274.96	240.82
116.968	287.51	263.17	276.75	116.968	255.22	268.79	116.967	262.36	319.77	116.969	208.12	241.81	182.6	116.969	226.18	257.88	220.67	116.968	223.05	284.91	116.967	205.14	208.52	116.969	226.77	242.62	267.59	116.969	244.67	230.58	116.969	277.04	231.09	116.968	282.82	302.62	116.967	274.69	238.67
117.668	287.5	262.78	276.96	117.669	255.05	268.73	117.667	262.81	313.97	117.667	209.76	242.75	182.42	117.669	226.79	259.42	223.2	117.668	222.54	284.39	117.667	209.74	208.06	117.669	226.44	242.75	267.86	117.667	245.55	238.43	117.667	276.67	231.08	117.668	285.89	316.61	117.667	275.53	238.99
118.368	296.03	263.1	277.46	118.369	255.41	269.17	118.367	262.03	309.79	118.369	210.25	242.36	180.66	118.369	227.18	259.87	217.51	118.368	222.44	282.65	118.368	212.24	209.17	118.369	227.2	243.61	271.51	118.367	254.83	237.01	118.368	276.13	231.99	118.369	284.78	309.08	118.367	274.96	239.25
119.067	307.45	263.48	277.74	119.068	255.15	270.66	119.069	262.51	308.56	119.067	210.51	242.76	180.43	119.069	224.9	259.44	208.86	119.069	222.31	281.7	119.067	205.27	209.2	119.068	226.65	243.79	276.67	119.067	250.35	230.08	119.068	276.76	231.16	119.067	287.61	305.72	119.067	274.94	239.77
119.767	312.89	262.44	278.21	119.768	254.51	279.65	119.769	262.31	307.21	119.769	209.77	243.15	181.61	119.769	223.54	259.08	207.42	119.769	223.93	280.82	119.767	205.99	208.83	119.77	227.12	243.71	273.78	119.767	247.61	223.33	119.77	276.23	230.76	119.768	276.66	302.45	119.768	282.32	240.06
120.467	298.99	264.59	278.59	120.469	254.51	269.78	120.469	261.36	308.63	120.469	205.07	243.02	178.35	120.469	224.23	259.99	207.41	120.47	228.81	280.95	120.467	203.65	209.29	120.469	226.63	243.11	270.95	120.469	248.55	221.76	120.466	277.2	231.24	120.469	272.99	301.85	120.466	282.53	241.21
121.167	303.27	264.2	278.64	121.17	254.78	271.55	121.168	261.8	308.52	121.169	210.76	247.91	177.87	121.167	224.17	263.52	207.4	121.168	228.96	280.24	121.167	206.23	209.25	121.169	225.95	243.47	270.72	121.169	244.45	221	121.166	276.92	233.69	121.169	272.22	299.95	121.169	272.15	240.91
121.867	309.39	264.14	278.96	121.868	254.3	269.95	121.867	262.3	309.8	121.869	208.13	247.35	191.59	121.867	223.8	260.75	207.17	121.868	224.26	280.26	121.867	204.01	209.04	121.865	225.54	242.6	270.03	121.869	244.49	221.07	121.868	277.34	232	121.869	271.14	301.04	121.866	271.3	241.1
122.568	306.2	264.05	279.51	122.568	254.95	270.1	122.567	261.31	308.85	122.57	207.16	244.9	192.81	122.568	223.74	260.86	207.22	122.568	223.6	280.43	122.568	203.88	215.53	122.569	226.75	242.63	269.67	122.567	243.45	222.47	122.568	277.12	233.04	122.569	271.79	301.14	122.569	267.3	241.61
123.268	294.07	264.17	278.96	123.269	256.26	270.45	123.267	261.77	309.76	123.268	209.73	240.48	201.06	123.268	223.91	260.12	207.48	123.268	222.62	282.79	123.268	202.75	219.55	123.269	227.24	243.27	268.6	123.267	242.89	223.11	123.267	277.15	251.69	123.269	271.2	301.78	123.267	265.68	241.46
123.968	294.06	265.02	279.77	123.969	265.65	269.23	123.968	261.48	308.79	123.968	209.62	239.21	193.87	123.967	224.19	259.51	207.52	123.97	222.31	282.18	123.969	203.34	217.94	123.969	225.53	243.39	268.85	123.967	243.8	223.11	123.967	277.67	262.32	123.969	270.85	301.83	123.967	266.58	241.8
124.668	292.05	265.71	279.41	124.669	266.7	269.76	124.668	261.82	308.9	124.668	211.05	239.3	186.31	124.668	226.21	259	208.03	124.668	222.37	282.98	124.667	203.29	215.86	124.669	226.4	243.7	269.12	124.663	244.06	223.32	124.667	277.62	240.33	124.668	271.24	301.23	124.667	268.51	242.07
125.368	292.72	265.57	279.28	125.369	266.45	269.42	125.369	266.59	306.42	125.369	210.1	241.4	186.89	125.368	226.28	258.84	208.48	125.368	223.35	284.58	125.367	203.39	210.44	125.369	227.38	243.7	268.66	125.367	243.32	223.96	125.367	286.86	233.26	125.368	272.06	301.72	125.368	269.58	241.39
126.068	293.18	266.46	279.35	126.068	258.71	268.88	126.068	284.16	316.96	126.069	210.13	241.11	181.28	126.068	226.12	259.45	220.25	126.068	222.69	284.33	126.067	203.76	207.61	126.068	226.14	243.68	269.12	126.069	243.21	224.45	126.067	280.48	232.68	126.068	272.05	301.57	126.068	270.66	241.5
126.768	293.24	264.33	279.75	126.77	253.58	269.32	126.769	283.3	322.66	126.768	209.15	241.78	182.59	126.768	225.65	261.06	222.27	126.77	225.64	282.42	126.767	203.99	205.11	126.768	227.11	243.68	269.35	126.768	243.84	224.64	126.768	278.39	232.78	126.77	272.45	300.86	126.768	272.05	240.84
127.468	292.31	272.74	280.39	127.47	252.91	268.85	127.469	269.62	311.04	127.47	206.39	242.04	179.24	127.469	224.57	263.11	221.49	127.47	226.74	282.87	127.469	204.08	203.39	127.468	226.33	243.53	269.66	127.467	243.53	224.28	127.466	276.7	234.53	127.469	272.8	310.44	127.468	272.94	241.64
128.169	289.89	271.35	281.3	128.169	253.86	268.66	128.167	262.96	308.38	128.167	207.21	241.92	175.5	128.169	223.88	259.73	218.48	128.169	223.09	282.11	128.167	204.01	202.75	128.168	226.34	256.66	269.48	128.167	243.53	224.34	128.167	273.89	235.5	128.169	271.8	308.63	128.168	274.24	241.38
128.869	288.92	268.04	284.56	128.869	253.56	268.65	128.869	262.07	308.41	128.867	207.42	241.73	177.05	128.868	223.93	259.91	212.99	128.869	222.06	281.31	128.87	204.46	202.28	128.868	226.79	251.37	269.47	128.867	243.69	224.97	128.867	273.24	248.08	128.869	272.52	303.74	128.869	274.64	242.01
129.567	288.15	264.39	281.73	129.569	254.24	267.89	129.569	262.36	308.18	129.567	208.81	241.94	174.58	129.568	223.86	259.81	208.63	129.569	221.83	280.79	129.567	204.36	202.99	129.568	227.59	248.83	269.02	129.567	243.67	225.48	129.567	274.98	261.48	129.569	272.73	304.24	129.569	274.71	241.34
130.268	287.97	263.77	279.25	130.269	253.56	268.25	130.269	262.68	306.77	130.269	206.79	242.53	176.96	130.268	223.63	259.77	207.86	130.269	222.19	280.16	130.268	204.77	203.5	130.268	226.57	247.2	269.45	130.267	244.47	225.38	130.267	275.55	245.06	130.27	272.62	303.12	130.269	274.8	240.71
130.968	286.67	264.07	276.48	130.968	254.5	268.95	130.968	262.63	307.88	130.969	208.23	241.81	174.32	130.968	223.37	259.04	207.63	130.97	222.13	280.91	130.968	204.73	204.31	130.968	225.32	242.99	269.73	130.968	243.9	225.41	130.967	275.37	236.02	130.968	273.85	302.74	130.969	276.04	240.39
131.668	286.77	263.31	277.05	131.668	254.31	268.22	131.668	262.66	308.02	131.667	205.51	242.15	175.57	131.668	222.74	259.11	207.23	131.668	222.19	284.46	131.668	204.38	205.34	131.668	227.09	238.68	269.77	131.668	243.76	224.83	131.669	274.92	251.82	131.67	273.02	304.76	131.67	275.82	241.23
132.368	286.65	263.48	276.76	132.368	254.32	267.83	132.367	262.41	306.37	132.368	209.96	242.46	176.41	132.368	222.79	259.62	207.62	132.37	222.96	282.74	132.368	203.74	205.58	132.368	226.67	238.21	274.4	132.368	244.75	226.2	132.368	274.52	238.57	132.37	273.45	310	132.37	275.86	241.32
133.068	303.93	263.97	277.25	133.068	254.72	268.6	133.069	263.11	306	133.068	211.4	243.2	176.92	133.067	227.28	258.69	208.07	133.068	222.63	283.78	133.067	204.63	205.55	133.068	226.54	237.51	275.71	133.068	245.21	225.76	133.068	274.96	237.54	133.069	272.73	308.05	133.068	275.44	241.34
133.768	314.16	263.74	277.17	133.768	254.8	269.91	133.767	262.75	307.17	133.767	212.49	242.94	177.11	133.769	226.34	262.96	207.54	133.77	221.78	284.02	133.769	204.03	205.83	133.768	226.74	237.74	274.64	133.768	244.5	225.76	133.767	274.89	250.01	133.769	286.56	303.55	133.768	274.81	240.48
134.469	311.91	264.55	277.83	134.468	254.98	276.79	134.467	262.78	306.85	134.469	211.54	242.58	177.71	134.468	227.03	266.51	217.25	134.47	225.89	283.03	134.469	203.9	206.2	134.468	226.72	238.89	271.31	134.468	244.09	225.43	134.468	275.11	265.62	134.469	286.44	301.66	134.47	274.32	240.53
135.168	301.09	265.23	278.09	135.168	254.52	268.12	135.168	276.65	305.83	135.169	210.06	242.36	177.59	135.168	224.59	261.81	222.08	135.17	229.73	280.78	135.168	204.45	206.59	135.168	227.18	239.81	268.64	135.169	244.04	226.39	135.168	274.66	260.64	135.168	276.12	301.24	135.168	275.06	240.57
135.87	300.8	265.63	278.29	135.868	254.37	269.73	135.869	282.36	306.76	135.867	211.5	243.62	177.66	135.868	223.38	260.55	221.96	135.868	226.67	280.08	135.869	204.27	206.92	135.868	230.81	242.78	267.56	135.867	244.92	226.12	135.868	275.34	247.72	135.868	274.37	301.3	135.868	275.78	240.27
136.57	294.8	265.36	278.91	136.568	253.88	269.64	136.565	272.68	309.34	136.567	209.54	246.16	177.39	136.569	222.89	261.02	216.75	136.569	223.64	280.15	136.567	204.23	206.92	136.567	256.25	242.47	267.59	136.567	244.03	225.77	136.568	275.87	248.06	136.568	272.8	301.87	136.568	275.09	241.01
137.271	299.92	274.69	279.2	137.268	263.99	270.19	137.268	264.59	308.68	137.268	207.77	245.31	177.3	137.269	223.16	260.01	210.29	137.269	223.62	278.87	137.269	204.67	207.17	137.267	261.33	241.82	267.41	137.269	244.78	225.5	137.268	275.94	234.14	137.268	271.74	302.24	137.268	275.01	243.7
137.969	297.37	271.44	279.04	137.97	263.53	269.65	137.964	261.41	306.12	137.968	207.59	241.62	179.46	137.968	222.87	260.22	208.5	137.967	222.57	281.39	137.969	204.22	207.32	137.967	261.93	242.27	267.58	137.969	245.09	225.55	137.968	276.13	242.08	137.969	272.15	302.69	137.968	274.51	253.76
138.669	294.71	267.28	278.9	138.668	257.14	270.4	138.669	262.35	305.98	138.667	206.68	239.55	180.62	138.669	223.12	259.36	207.97	138.667	222.21	286.48	138.667	204.37	207.36	138.669	261.53	242.79	267.58	138.669	245.02	225.92	138.667	276.29	234.17	138.667	272.5	303.66	138.668	274.34	254.28
139.369	293.21	265.19	279.34	139.368	252.96	269.92	139.369	263.19	306.23	139.369	208.18	238.41	190.04	139.367	222.77	259.49	208.39	139.367	222.02	284.17	139.369	204.38	207.17	139.369	252.33	242.75	267.65	139.368	244.59	224.92	139.368	275.72	236.66	139.368	271.7	310.5	139.368	274.22	247.69
140.068	291.14	264.94	279.43	140.067	252.88	269.52	140.068	263.28	308.51	140.069	210.72	239.27	188.2	140.069	222.94	260.66	208.32	140.068	222.6	282.25	140.068	204.48	207.07	140.07	241.37	242.27	267.43	140.069	244.17	226.03	140.067	275.87	233.15	140.068	273.18	308.74	140.068	276.32	240.77
140.77	290.55	265.79	280.68	140.767	252.55	269.04	140.768	263.43	307	140.767	209.47	240.79	191.31	140.768	222.91	261.79	208.38	140.768	223.46	280.79	140.767	204.74	205.39	140.768	235.53	242.76	267.54	140.769	243.69	225.1	140.767	276.5	231.99	140.769	272.71	307.44	140.767	286.15	238.2
141.469	290.56	265.43	281.04	141.468	253.89	268.35	141.469	263.69	308.31	141.467	208.81	240.73	190.52	141.468	223.45	261.98	208.02	141.468	225.68	281.05	141.468	204.32	207.36	141.469	231.61	242.72	268.25	141.469	244.16	224.82	141.469	276.45	236.21	141.469	273.61	304.35	141.468	278.78	237.68
142.169	291.46	265.55	282.19	142.167	253.86	268.37	142.169	263.63	306.44	142.169	209.15	241.33	187.41	142.168	226.46	259.65	208.04	142.169	224.94	280.21	142.168	203.81	207.66	142.168	230.17	242.12	268.2	142.171	253.12	224.46	142.167	276.88	234.69	142.169	272.64	301.63	142.169	274.47	238.71
142.869	292.33	264.96	276.32	142.868	254.53	268.15	142.87	263.68	306.86	142.869	208.8	242.02	186.95	142.868	226.08	258.99	220.19	142.867	222.73	281.89	142.868	203.8	207.2	142.868	228.55	243.27	268.64	142.87	249.02	225.41	142.867	276.61	238.36	142.869	272.13	301.72	142.869	268.86	239.38
143.565	292.06	265.06	275.82	143.568	254.53	267.95	143.57	263.54	304.6	143.568	209.99	241.54	186.49	143.566	224.64	258.58	225.9	143.569	220.77	282.3	143.568	203.95	207.33	143.568	228.91	243.16	271.8	143.568	246.5	224.95	143.567	277.45	235.11	143.569	284.21	302.44	143.569	267.67	240.96
144.269	288.19	264.84	274.87	144.268	255.11	268.45	144.268	263.67	303.84	144.267	209.71	241.89	178.37	144.268	224.22	258.18	223.7	144.269	221.48	282.85	144.268	203.67	208.19	144.268	228.71	242.99	273.29	144.268	244.7	225.96	144.269	277.17	238.52	144.267	290.45	301.93	144.269	268.71	240.96
144.97	290.7	265.9	277.6	144.968	254.8	268.04	144.97	263.24	307.17	144.969	206.04	242.57	176.25	144.968	223.81	258.16	215.19	144.969	221.54	284.97	144.969	203.8	208.3	144.968	229.66	243.45	272.31	144.968	242.91	225.08	144.967	277.46	234.97	144.967	287.84	301.58	144.969	268.89	242.06
145.668	288.86	265.98	278.28	145.668	254.99	268.15	145.67	263.33	307.47	145.667	208.59	242.23	175.65	145.668	223.22	258.21	211.43	145.669	221.83	284.53	145.669	203.52	208.48	145.669	230.41	243.38	272.05	145.668	243.03	225.21	145.668	276.42	234.07	145.669	282.7	302.08	145.667	269.83	241.22
146.369	289.17	266.38	277.68	146.368	254.72	267.89	146.369	263.16	308.56	146.369	205.64	242.21	176.04	146.367	222.76	257.96	210.42	146.369	221.41	281.51	146.368	203.61	207.83	146.369	231.06	244.01	273.44	146.367	243.87	224.8	146.366	277	232.29	146.368	274.9	301.35	146.364	270.51	241.78
147.069	288.83	266.91	277.76	147.068	254.37	268.55	147.069	263.04	306.13	147.069	203.75	242.26	176.75	147.067	222.92	259.34	208.59	147.069	220.77	281.06	147.068	203.5	208.17	147.069	231.34	243.5	271.78	147.069	244.11	225.04	147.066	276.28	233.96	147.07	270.01	302.29	147.068	270.98	250.15
147.769	291.43	266.55	278.78	147.768	255.04	268.77	147.765	262.87	306.83	147.768	205.27	242.2	175.28	147.767	225.3	266.46	208.38	147.769	222.29	280.58	147.768	204.07	208.08	147.768	231.83	244.33	270.13	147.768	244.07	224.76	147.766	276.04	234	147.768	269.86	302.7	147.768	271.57	253.72
148.469	287.69	267.4	279.38	148.468	254.85	268.51	148.466	262.35	307.9	148.469	206.67	242.83	177.56	148.467	227.45	263.39	208.14	148.469	223.2	281.24	148.468	203.35	212.22	148.468	231.17	243.65	268.76	148.469	244.46	225.12	148.466	276.78	234.91	148.469	269.14	301.68	148.468	271.54	249.92
149.169	286.83	267.52	279.54	149.17	254.27	267.94	149.165	262.95	306.38	149.168	206.89	245.22	176.28	149.167	227.26	261.3	208.24	149.169	232.25	282.3	149.17	210.73	211.14	149.168	231.28	243.89	268.09	149.168	244.01	225.3	149.167	276.9	234.37	149.169	270	301.89	149.168	272.46	242.47
149.869	287.6	267.48	279.68	149.868	253.34	269.42	149.869	263.04	307.62	149.867	209.11	247.85	176.27	149.868	226.71	260.1	208.32	149.869	227.45	284.13	149.868	211.3	213.56	149.868	231.88	244.05	268.77	149.868	244.14	225.24	149.867	277.1	234.46	149.868	269.87	302.61	149.864	273.02	240.13
150.569	289.32	266.96	280.04	150.568	261.81	280.38	150.571	263.63	306.6	150.567	208.83	243.46	177.63	150.568	224.97	259.76	210.85	150.569	222.29	281.8	150.568	207.84	211.26	150.568	231.37	244.12	268.6	150.568	243.68	225.72	150.566	277.59	234.69	150.568	269.75	301.83	150.564	272.99	238.36
151.27	282.24	272.16	279.74	151.268	260.66	278.47	151.269	263.14	307.81	151.269	209.49	239.6	179.63	151.268	223.94	259.78	222.3	151.267	222.01	281.09	151.268	207.81	210.88	151.267	230.45	244.66	268.73	151.268	244.26	225.13	151.266	277.09	235.21	151.268	270.52	301.76	151.269	272.48	238.23
151.969	284.64	271	280.2	151.967	260.3	268.18	151.969	262.62	307.18	151.967	209.38	238.24	179.22	151.968	222.91	259.37	223.07	151.968	221.82	280.95	151.969	207.85	208.56	151.968	230.18	243.87	268.86	151.968	244.28	225.23	151.969	277.52	235.85	151.97	270.71	302.02	151.969	272.1	238.24
152.669	307.95	269.49	280.49	152.667	255.55	268.31	152.666	262.96	306.13	152.667	209.64	239.63	180.3	152.668	222.36	258.72	218.67	152.668	221.95	280.4	152.669	204.72	205.85	152.669	231.01	244.16	268.72	152.668	245.26	225.04	152.666	276.93	235.57	152.67	270.67	302.29	152.668	272.24	239.25
153.369	311.79	265.13	280.52	153.367	251.67	268.77	153.369	263.01	307.16	153.368	210.41	240.53	178.68	153.368	222.78	260.13	211.33	153.369	221.58	279.86	153.369	202.67	207.34	153.368	229.42	243.34	269.12	153.369	244.86	225.65	153.369	276.27	240.59	153.37	273.36	302.07	153.368	273.13	240.23
154.069	294.9	264.15	279.97	154.067	252.08	268.44	154.07	262.86	303.53	154.068	207.35	241.18	178.59	154.067	222.37	264.15	208.59	154.069	222.33	285.78	154.069	202.14	208.74	154.068	230.22	243.94	269.02	154.068	244.7	238	154.067	277.86	237.21	154.068	280.55	305.48	154.068	273.06	240.19
154.769	297.06	266.31	280.24	154.767	252.38	269.51	154.768	263.2	316.44	154.767	207.59	240.66	177.5	154.767	222.29	262.68	208.2	154.769	222.03	286.9	154.769	201.58	206.96	154.768	229.68	243.91	268.96	154.769	244.6	236.95	154.769	276.81	235.04	154.768	284.78	315.84	154.768	273.65	240.79
155.471	311.28	266.73	281.19	155.467	252.75	269.89	155.468	262.67	321.41	155.468	204.93	240.57	176.63	155.468	223.1	260.39	208.12	155.469	222.89	285.53	155.468	201.67	204.56	155.468	230.34	243.36	268.94	155.469	245.82	231.55	155.468	277.56	236.04	155.468	276.84	307.06	155.47	272.7	240.96
156.168	293.98	266.93	280.82	156.168	256.55	269.02	156.168	262.31	312.58	156.168	204.04	240.66	177.7	156.167	225.61	258.61	208.2	156.169	224.29	284.17	156.168	203.81	204.04	156.168	229.49	243.39	268.99	156.169	244.53	223.23	156.169	276.62	235.42	156.168	269.35	302.51	156.168	273.02	239.92
156.869	294.57	266.09	281.02	156.867	254.46	269.16	156.868	262.33	310.42	156.868	207.99	240.33	177.15	156.869	226.25	258.02	207.9	156.869	223.2	282.4	156.867	203.07	203.69	156.867	229.8	244.43	269.45	156.869	244.9	220.56	156.869	277.27	236.08	156.867	270.97	302.18	156.869	272.15	240.92
157.569	297.24	266.83	281.04	157.568	256.93	269.4	157.568	262.61	309.79	157.568	208.84	240.78	190.8	157.569	226.2	258.69	208.11	157.57	220.94	281.96	157.567	203.14	203.32	157.569	230.38	243.95	270.24	157.569	245.07	219.26	157.569	277.21	235.91	157.569	272.49	303.32	157.569	272.9	239.78
158.269	295.01	268.29	282.16	158.268	252.98	269.14	158.269	278.74	307.89	158.268	208.11	241.3	190.1	158.268	225.45	258.8	217.98	158.268	221.03	281.27	158.267	202.41	204.43	158.27	229.93	243.35	270.05	158.268	245.29	219.9	158.269	277.12	235.84	158.267	271.31	301.87	158.268	272.99	240.94
158.967	295.56	267.44	284.89	158.969	252.18	269.19	158.969	281.27	307.17	158.968	209.11	241.48	199.73	158.969	224.71	258.31	222.61	158.968	220.3	280.21	158.967	203.11	204.19	158.969	229.1	243.5	273.11	158.968	245.51	221.1	158.969	277.89	236.15	158.967	272.06	300.33	158.968	272.56	240.48
159.669	294.98	266.88	284.16	159.669	253.15	268.89	159.668	277.98	307.21	159.668	209.34	240.97	192.31	159.669	223.88	258.09	220.98	159.668	220.7	281.87	159.668	203.23	205.28	159.668	229.12	248.35	274.46	159.665	244.55	221.38	159.668	277.21	236.05	159.667	272.58	301.26	159.668	272.54	241.28
160.369	296.18	267.16	279.11	160.369	253.45	268.37	160.37	265.35	307.74	160.369	209.05	241.21	190.15	160.368	222.82	259.56	213.38	160.368	221.66	280.78	160.367	203.06	205.19	160.368	228.31	253.43	271.95	160.368	244.88	222.73	160.368	278.03	235.48	160.367	273.17	301.32	160.368	272.45	241.02
161.068	293.59	267.09	279.32	161.069	253.88	268.84	161.068	262.2	308.55	161.069	209.64	241.01	188.92	161.068	222.77	264.15	209.12	161.069	221.47	283.3	161.068	203.08	205.91	161.068	228.62	250.5	267.37	161.068	244.24	222.92	161.069	277	237.11	161.067	272.97	301.99	161.068	272.45	240
161.768	293.61	267.93	278.8	161.769	253.87	268.63	161.77	262.68	305.44	161.767	209.35	241.51	183.97	161.769	222.46	259.75	207.59	161.768	221.73	285.42	161.768	203.76	206.43	161.768	228.73	240.47	263.66	161.768	244.17	223.29	161.77	277.54	237.05	161.768	272.75	302.9	161.767	272.16	240.73
162.467	294.21	267.38	278.88	162.469	254.2	268.84	162.469	262.77	306.56	162.469	205.26	245.71	178.92	162.469	224.59	257.91	207.5	162.47	221.99	282.08	162.467	203.58	206.48	162.468	228.43	237.12	262.94	162.468	244.48	223.88	162.468	277.52	236.67	162.469	272.99	303.27	162.468	272.79	240.26
163.167	294.88	268.08	279.36	163.169	253.83	268.37	163.169	262.94	307.08	163.169	203.91	245.31	187.09	163.169	226.17	258.55	207.18	163.168	223.21	282.26	163.169	203.61	206.87	163.168	228.64	237.16	264.37	163.17	244.1	224.25	163.168	277.15	257.22	163.167	273.33	302.91	163.169	283.79	239.99
163.867	306.71	268.11	279.15	163.868	254.17	268.19	163.868	263.92	306.33	163.868	205.92	246.35	188.36	163.869	226.24	258.23	207.49	163.869	229.26	281.77	163.868	203.51	205.77	163.87	228.97	238.32	264.11	163.868	244.58	223.99	163.868	279.91	270.94	163.869	272.92	303.29	163.867	273.1	240.25
164.569	301.46	267.48	279.39	164.57	254.16	268.09	164.57	263.3	306.39	164.569	204.66	241.63	186.27	164.567	226.86	257.31	209.68	164.569	226.2	281.46	164.569	204	206.35	164.57	228.47	239	264.21	164.568	244.06	224.54	164.568	287.35	260.64	164.569	272.82	303.53	164.564	268.33	239.9
165.267	305.91	267.15	280.25	165.27	253.96	267.87	165.269	263.33	306.53	165.268	206.4	237.87	184.91	165.269	225.45	257.38	221.28	165.269	223.04	280.92	165.269	203.48	206.43	165.27	228.67	239.46	265.41	165.267	243.49	224.47	165.269	282.53	251.52	165.267	272.57	302.63	165.268	267.02	239.91
165.969	297.42	269.77	280.06	165.97	254.43	267.73	165.969	263.17	306.03	165.97	207.43	237.37	184.3	165.968	224.38	257.26	221.46	165.969	221.85	281.26	165.968	204.07	206.75	165.97	228.14	239.8	265.77	165.968	244.29	224.53	165.967	279.58	246.45	165.968	273.65	303.49	165.968	265.86	240.25
166.668	306.09	270.24	280.1	166.67	254.16	267.93	166.669	263.42	305.67	166.667	207.75	237.91	185.17	166.67	224.09	258.27	218.27	166.669	221.41	281.42	166.668	203.63	206.79	166.669	228.36	240.83	266.02	166.668	244.36	224.69	166.668	274.93	247.02	166.668	273.02	314.77	166.668	266.04	239.53
167.37	302.8	269.61	280.82	167.368	253.74	268.3	167.369	263.97	304.85	167.368	207.96	238.89	180.81	167.369	223.35	258.54	211.18	167.369	221.5	282.06	167.369	203.56	207.31	167.369	228.17	241.52	266.2	167.368	243.88	224.84	167.368	274.84	241.39	167.368	274.04	310.96	167.362	267.62	244.42
168.067	297.25	269.73	279.73	168.069	253.52	267.42	168.071	263.4	305.96	168.068	209.3	239.26	176.63	168.069	223.38	265.23	207.63	168.069	221.38	281.07	168.069	203.87	206.74	168.069	228.27	242.36	266.46	168.068	243.85	225.84	168.068	272.54	235.9	168.068	272.19	306.39	168.068	268.31	254.53
168.769	292.61	269.24	280.36	168.769	259.16	267.83	168.769	262.93	304.68	168.769	203.49	240.46	177.1	168.767	223.2	264.65	207.01	168.769	220.77	285.21	168.769	203.76	207.23	168.768	252.33	242.5	270.78	168.768	243.84	225.04	168.768	277.04	226.4	168.77	274.05	304.21	168.768	268.27	251.56
169.469	291.54	269.26	281.35	169.47	264.18	268.02	169.469	262.86	305.73	169.471	203.16	239.94	176.98	169.469	222.94	259.53	207.77	169.471	222.96	286.8	169.469	203.2	207.09	169.467	259.53	242.79	274.2	169.468	253.38	225.08	169.468	281.04	230.85	169.468	272.75	302.8	169.469	269	244.47
170.169	293.24	268.02	281.39	170.168	263.66	267.69	170.169	263.32	305.85	170.17	203.93	239.79	175.73	170.169	222.82	259.59	207.34	170.169	223.98	285.85	170.169	203.16	207.22	170.169	259.89	242.33	273.52	170.167	250.87	225.55	170.168	279.92	220.02	170.168	272.77	302.27	170.169	269.18	238.76
170.867	292.65	268.12	280.88	170.87	264.09	268.18	170.865	262.64	303.72	170.868	205.51	240.43	175.25	170.867	222.63	258.65	207.5	170.869	222.9	284.69	170.869	203.54	207.3	170.869	256.71	242.22	270.93	170.868	247.76	224.89	170.868	275.66	223.56	170.868	272.54	302.95	170.863	270.45	237.8
171.568	293.37	268.67	280.47	171.57	255.25	268.08	171.569	263.12	304.1	171.569	205.51	240.78	175	171.569	225.68	258.47	207.58	171.569	221.59	282.58	171.569	203.36	207.49	171.569	253.17	242.86	270.23	171.567	245.47	224.88	171.567	274.08	225.88	171.568	271.42	301.81	171.567	270.35	236.92
172.268	293.77	269.41	281.48	172.268	252.62	268.24	172.265	262.06	304.23	172.269	207.22	240.33	175.72	172.268	226.9	257.97	217.98	172.269	222.37	280.71	172.269	203.21	207.67	172.269	239.12	242.65	268.98	172.267	244.69	225.84	172.268	273.07	224.96	172.268	272.16	302.64	172.267	270.82	237.41
172.968	292.16	269.17	281.84	172.968	252.52	268.05	172.967	262.54	304.41	172.969	207.72	240.38	178.49	172.97	225.15	258.84	223.39	172.969	222	281.18	172.969	202.95	206.58	172.969	232.61	243.09	268.74	172.967	242.69	225.49	172.969	275.32	223.35	172.969	272.3	302.05	172.968	270.66	237.63
173.668	293.83	269.3	282.62	173.669	252.66	268.17	173.669	261.98	302.88	173.669	204.63	240.64	179.21	173.664	224.05	258.44	222.7	173.669	221.74	279.66	173.669	203.64	207.34	173.67	231.08	242.85	268.06	173.669	243.07	226.11	173.667	275.58	225.52	173.668	272.26	302.19	173.669	270.95	239
174.368	290.47	268.72	283.83	174.368	253	268.01	174.367	262.71	303.62	174.368	204.09	241.16	177.83	174.366	223.79	259.1	214.37	174.368	221.95	280.8	174.369	204.28	206.99	174.369	230.31	242.99	267.64	174.368	243.67	225.4	174.367	276.53	228.39	174.37	271.37	301.99	174.369	271.65	239.37
175.07	292.28	268.82	285.69	175.069	253	268.07	175.063	262.31	304.19	175.064	206.69	246.16	176.16	175.068	222.67	261.93	208.54	175.068	221.95	281.13	175.069	204.21	206.76	175.07	230.25	243.49	267.99	175.068	243.7	225.52	175.067	276.03	230.55	175.066	271.2	302.42	175.067	271.86	240.45
175.768	293.11	275.71	283.34	175.769	253.12	268.26	175.767	262.53	304.2	175.768	203.88	245.18	178.92	175.768	222.89	258.7	208.08	175.77	221.93	283.47	175.769	203.42	206.94	175.768	229.88	243.08	268.16	175.769	243.98	225.04	175.769	277.04	232.8	175.768	282.28	302.54	175.767	272.43	240.78
176.464	291.56	274.74	279.44	176.469	254.2	268.17	176.467	261.89	303.92	176.469	204.96	243.69	178.98	176.469	222.28	258.25	207.17	176.47	221.96	285.87	176.468	203.73	206.88	176.468	230.58	242.53	268	176.467	243.35	225.46	176.467	277.4	232.87	176.467	284.87	303.22	176.465	272.02	240.75
177.169	290.43	273.43	280.6	177.169	253.83	268.53	177.169	261.66	303.95	177.169	207.59	239.56	180.95	177.169	222.07	258.72	207.16	177.17	223.42	283.14	177.168	203.06	205.4	177.168	230.63	242.96	268.35	177.169	243.23	225.2	177.168	277.47	233.63	177.167	284.09	302.51	177.167	272.56	240.88
177.869	288.95	268.72	280.65	177.869	253.55	273.06	177.867	264.9	304.08	177.869	208.7	238.22	186.75	177.868	223.68	258.79	207.73	177.868	231.11	283.89	177.869	203.2	206.18	177.868	230.9	243.04	268.01	177.869	243.67	225.3	177.869	278.23	234.95	177.868	276.07	302.64	177.868	272.49	240.33
178.568	290.82	267.41	280.38	178.569	253.59	278.4	178.568	282.77	303.56	178.569	208.38	238.61	190.09	178.569	227.13	258.66	207.73	178.57	229.85	282.24	178.569	203.37	206.22	178.568	230.26	242.86	268.98	178.569	244.04	233.15	178.569	277.71	235.03	178.566	271.7	303.46	178.566	271.92	239.78
179.268	290.48	269.11	280.75	179.269	254.11	269.25	179.268	276.35	307.21	179.269	208.93	239.27	192.14	179.269	226.51	258.44	208.26	179.27	222.79	281.65	179.268	203.62	209.33	179.268	230.5	243.13	268.35	179.267	244.35	237.92	179.269	276.83	235.48	179.268	270.02	302.07	179.266	272.02	240.08
179.964	289.03	269.8	280.65	179.968	253.67	270.55	179.968	265.46	313.53	179.969	209.43	239.67	188.3	179.969	226.62	257.62	221.52	179.971	221.78	281.24	179.964	203.2	214.47	179.969	230.57	242.92	268.18	179.969	243.51	235.19	179.969	277.62	235.61	179.969	269.39	302.01	179.967	272.58	240.24
180.668	291.44	269.36	281.06	180.668	254.06	269.53	180.668	261.73	309.63	180.668	204.04	239.75	188.37	180.669	225.82	263.49	222.69	180.669	220.51	280.8	180.668	202.89	214.23	180.669	229.18	247.55	268.4	180.669	244.62	226.08	180.667	277.47	236.59	180.668	269.28	302.63	180.666	272.53	240.03
181.368	286.97	269.33	281	181.368	253.53	269.53	181.367	262.34	306.24	181.369	200.06	239.75	185.82	181.369	223.51	264.56	218.66	181.369	221.52	280.64	181.368	202.94	210.51	181.369	229.59	255.29	268.22	181.368	243.84	222.48	181.367	277.07	236.42	181.367	270.12	302.09	181.368	271.15	240.17
182.067	287.03	268.97	281.35	182.068	255.75	269.81	182.069	263.14	306.44	182.07	204.56	240.05	185.8	182.07	223.07	260.35	211.08	182.069	222.08	280.55	182.069	203.09	210.42	182.069	229.23	251.91	268.42	182.068	243.51	220.54	182.069	277.4	237.35	182.07	271.32	302.15	182.067	271.4	239.57
182.767	295.7	268.92	281.87	182.768	261.72	268.63	182.767	262.82	305.41	182.77	207.91	240.52	183.43	182.769	222.47	258.12	208.01	182.769	222.22	284.91	182.769	203.21	204.95	182.769	228.76	244.93	267.98	182.768	244.41	220.71	182.768	277.52	236.29	182.77	270.8	301.69	182.768	272.41	239.54
183.465	316.21	269.59	281.44	183.468	261.24	269.07	183.469	263.23	306.29	183.47	208.44	240.27	178.83	183.47	222.26	257.59	207.36	183.469	221.06	286.03	183.465	203.02	204.1	183.469	230.02	239.15	268.81	183.468	243.75	221.46	183.469	277.81	237.28	183.469	271.52	301.07	183.468	270.87	239.75
184.163	309.59	269.43	281.73	184.169	254.65	268.56	184.169	262.78	305.73	184.168	207.99	240.4	178.21	184.167	221.88	257.64	207.53	184.169	222.09	284.78	184.169	203.24	200.63	184.168	229.15	236.81	268.48	184.168	244.2	222.16	184.167	284.55	237.25	184.165	271.63	301.68	184.169	270.74	239.47
184.864	321.27	268.7	281.38	184.869	252.21	268.88	184.868	262.52	305.81	184.868	207.54	240.66	180.42	184.869	222.71	257.58	207.93	184.87	225.23	282.44	184.87	204.57	201.76	184.868	227.78	236.49	271.44	184.868	243.78	222.55	184.867	290.9	237.36	184.869	272.17	301.22	184.868	270.65	239.3
185.564	321.83	269.36	281.77	185.568	252.01	268.85	185.568	262.65	305.5	185.57	208.79	240.18	177.7	185.567	222.34	257.32	208.03	185.568	223.29	283.1	185.568	213.95	201.99	185.569	228.43	237.74	273.56	185.568	242.97	223.16	185.567	281.54	237.12	185.569	272.35	302.02	185.568	270.88	239.49
186.268	305.73	269.45	282.17	186.268	251.81	268.32	186.268	262.53	305.57	186.269	207.72	240.88	175.68	186.267	225.04	257.91	207.66	186.268	220.96	282.11	186.268	210.15	201.49	186.269	228.16	238.29	273.3	186.268	243.51	223.59	186.269	277.73	238.6	186.269	271.98	302.23	186.268	271.42	239.89
186.968	298.33	269.34	282.3	186.968	251.68	268.54	186.969	262.18	305.42	186.969	208.87	241.27	174.78	186.967	227.83	260.99	207.96	186.968	221.82	282.31	186.966	208.22	201.87	186.969	227.52	238.99	269.22	186.968	243.74	224.04	186.967	275.2	237.07	186.969	271.31	301.94	186.968	271.67	238.7
187.669	301.79	269.88	282.44	187.668	252.08	268.33	187.669	262.32	304.84	187.67	203.8	241.39	176.27	187.667	225.68	263.14	209.85	187.67	222.47	280.63	187.664	203.5	202.27	187.67	227.74	239.65	268.82	187.668	244.06	226.88	187.668	274.08	237.66	187.669	272.24	301.88	187.668	271.14	239.19
188.367	299.56	269.75	282.09	188.368	252.35	268.21	188.367	261.83	304.65	188.366	203.59	240.42	175.83	188.368	224.82	262.3	223.42	188.368	222.07	281.13	188.364	201.67	202.89	188.368	228.01	240.75	266.92	188.368	243.35	235.24	188.367	275.69	240.13	188.368	271.83	302.13	188.368	270.88	239.49
189.067	295.9	270	282.39	189.07	251.63	268.08	189.065	261.83	304.23	189.068	204.68	240.56	174.71	189.068	223.47	259.91	224.68	189.068	222.22	280.31	189.068	200.14	202.85	189.069	227.49	241.01	267.27	189.068	243.3	234.55	189.068	276.27	238.84	189.069	271.88	301.61	189.07	271.03	239.42
189.767	296.75	269.4	282.47	189.768	252.42	267.95	189.769	261.82	303.73	189.769	205.59	240.71	173.52	189.768	222.89	258.72	221.77	189.77	221.79	278.67	189.769	199.57	203.3	189.769	229.01	241.59	267.67	189.768	242.67	224.04	189.768	276.88	239.29	189.768	272.74	300.81	189.767	271.2	239.62
190.467	299.99	271.63	283.18	190.471	252.28	268.24	190.469	261.06	304.58	190.469	207.94	245.9	176.66	190.468	222.49	258.31	212.94	190.469	222.24	281.14	190.465	199.55	204.07	190.467	228.08	241.3	267.8	190.467	243.64	220.85	190.468	277.61	238.39	190.47	271.86	301.92	190.469	271.43	239.12
191.167	296.38	275.41	283.88	191.169	252.51	267.94	191.165	261.35	307.34	191.169	208.98	246.19	174.74	191.168	222.15	258.19	208.35	191.17	225.34	282.93	191.165	199.63	203.8	191.169	251.36	242.65	267.65	191.167	243	220.23	191.168	277.24	237.91	191.168	271.1	314.75	191.168	271.56	238.61
191.869	299.11	275.4	283.25	191.869	252.8	276.72	191.869	261.72	305.69	191.87	205.38	245.23	176.19	191.868	221.9	257.84	207.45	191.868	226.38	282.23	191.863	200.3	204.3	191.867	258.98	242.45	267.44	191.867	242.72	220.19	191.868	278.04	239.77	191.868	270.7	306.21	191.868	270.84	249.01
192.568	297.51	271.32	283.58	192.567	252.96	273.04	192.568	261.66	303.98	192.569	204.69	240.35	178.6	192.568	221.91	257.97	207.78	192.57	223.11	283.88	192.565	199.91	205.31	192.569	259.42	241.9	271.45	192.567	253.35	220.78	192.568	277.31	238.81	192.568	269.51	304.41	192.568	276.7	252.99
193.268	295.33	266.19	283.55	193.269	252.47	267.02	193.27	261.6	304.7	193.268	204.93	237.48	177.04	193.268	221.75	260.27	207.75	193.268	222	283.51	193.265	200.56	205.1	193.269	251.53	241.97	277.48	193.267	250.39	221.28	193.268	277.33	239.96	193.269	270.25	302.59	193.268	277.36	247.08
193.968	295.74	267.38	282.9	193.969	252.61	268.42	193.97	261.45	303.6	193.968	205.6	236.01	177.6	193.968	221.53	264.58	207.24	193.97	222.2	282.6	193.964	200.22	204.86	193.969	256.08	242.3	275.34	193.967	247.53	222.46	193.967	277.23	240.07	193.969	270.41	300.78	193.969	267.44	240.66
194.669	296.87	269.31	282.82	194.668	252.82	268.89	194.668	261.01	303.28	194.668	208.51	237.68	176.55	194.667	224.65	259.42	207.6	194.668	221.76	282.4	194.667	200.99	204.87	194.667	249.34	242.13	273.55	194.669	246.55	222.71	194.667	278.16	264.47	194.67	282.17	300.08	194.669	265.72	237.67
195.368	296.44	269.45	283.31	195.368	252.34	269.13	195.368	260.27	302.79	195.369	209.06	238.15	177.51	195.367	225.87	257.82	207.97	195.369	221.82	281.06	195.368	200.69	204.71	195.367	237.32	242.01	269.7	195.368	242.2	222.89	195.367	277.24	274.54	195.369	284.36	300.32	195.369	262.23	235.69
196.068	295.67	269.45	283.59	196.067	253.06	268.78	196.068	260.4	302.28	196.069	209.31	239.3	177.87	196.067	226.18	258.37	219.19	196.068	222.01	281.12	196.068	201.31	204.38	196.067	232.29	242.82	268.19	196.068	242.14	223.34	196.067	277.05	275.02	196.069	275.85	301.02	196.068	264.59	236.53
196.769	297.35	269.84	283.53	196.769	253.35	268.87	196.769	260.97	304.42	196.769	209.33	239.34	174.38	196.767	225.52	257.51	222.99	196.77	222.12	280.17	196.768	201.53	204.27	196.768	230.7	251.37	269.29	196.768	243.23	233.4	196.769	277.52	254.83	196.767	273.02	301.87	196.769	264.55	237.06
197.468	306.86	270.09	283.46	197.467	260.86	268.75	197.468	260.53	303.21	197.47	210.69	239.89	183.06	197.47	225.38	257.33	220.82	197.47	221.48	277.91	197.468	200.64	205.1	197.468	230.27	253.07	268.52	197.468	243.75	237.63	197.467	277.94	254.08	197.468	271.34	301.57	197.469	265.96	238.68
198.169	318.79	271.24	283	198.168	262.27	268.85	198.165	260.28	303.25	198.169	210.69	240.03	188.03	198.168	223.04	257.46	214.87	198.17	225.03	278.22	198.166	201.46	205.52	198.168	228.57	248.06	268.98	198.169	243.3	229.05	198.169	276.5	247.7	198.168	269.96	301.37	198.165	266.2	239.43
198.869	316.34	270.58	284.64	198.868	256.69	268.53	198.868	260.74	302.42	198.869	203.64	240.33	196.08	198.869	223.26	257.1	208.33	198.868	226.19	278.75	198.863	201.37	204.98	198.868	229.13	240.25	268.52	198.868	243.31	222.26	198.867	277.4	250.3	198.868	269.71	301.5	198.869	267.73	239.51
199.569	299.77	270.31	284	199.569	251.81	268.08	199.568	260.25	302.59	199.569	208.17	240.46	192.2	199.567	222.78	257.68	207.78	199.569	223.64	279.55	199.565	201.64	204.88	199.568	227.31	237.2	268.49	199.569	243.13	220.74	199.567	277.88	242.23	199.569	269.45	306.77	199.563	268.51	239.1
200.267	307.81	270.6	283.39	200.267	251.07	267.97	200.271	260.45	309.55	200.269	203.87	240.05	187.97	200.268	222.67	263.64	207.54	200.269	222.61	280.56	200.263	202.06	204.75	200.268	227.98	239.13	268.46	200.269	243.06	220.11	200.269	277.52	238.9	200.268	269.13	314.57	200.265	269	239.41
200.97	301.29	270.32	288.51	200.968	250.85	267.98	200.968	260.31	319.93	200.967	203.76	240.49	181.6	200.968	222.86	261.65	207.14	200.97	221.31	279.49	200.964	201.67	205.67	200.967	228.42	240.72	268.99	200.969	243.44	219.73	200.967	277.77	237.72	200.968	270.12	304.03	200.965	270.11	239.56
201.668	302.82	270.14	288.36	201.667	251.23	267.73	201.669	260.43	314.03	201.668	205.87	240.56	177.39	201.668	221.99	260.01	207.18	201.668	221.6	279.71	201.664	201.79	204.81	201.669	228.03	240.31	268.64	201.669	243.85	220.72	201.667	277.82	237.07	201.668	269.42	301.29	201.664	270.82	239.06
202.368	300.45	270.29	282.81	202.37	251.03	268.01	202.37	259.88	306.84	202.364	207.09	240.59	175.47	202.368	222.19	258.92	208.07	202.368	221.44	278.55	202.364	202.57	204.72	202.369	228.15	240.86	268.84	202.37	243.68	221.54	202.369	277.8	236.94	202.368	269.34	300.49	202.364	271.55	239.47
203.068	295.37	270.19	279.7	203.068	251	268.15	203.068	260.28	306.09	203.069	208.04	239.59	178.46	203.068	223.17	258.13	207.87	203.068	221.67	279.5	203.068	202.76	204.91	203.069	227.76	248.75	268.79	203.068	243.23	221.35	203.067	278.32	237.25	203.068	275.26	298.47	203.064	271.33	239.44
203.768	297.6	270.56	280.95	203.768	251.03	267.45	203.768	260.38	304.95	203.769	208.07	244.79	179.24	203.77	226.42	257.29	219.39	203.768	221.14	284.28	203.768	202.68	204.63	203.767	227.5	244.56	268.75	203.769	243.72	221.56	203.768	278.14	236.68	203.769	281.63	298.65	203.768	271.19	239.62
204.468	293.25	270.25	281.88	204.468	251.07	267.01	204.469	260.08	304.3	204.469	201.74	244.03	177.99	204.469	224.17	257.12	223.66	204.468	221.44	285.92	204.469	202.36	205.27	204.469	228.11	240.61	268.66	204.469	243.78	222.93	204.466	278.03	236.91	204.469	273.84	298.89	204.469	271.38	238.94
205.168	297.76	270.89	281.12	205.169	251.29	267.37	205.169	260.58	304.06	205.169	206.27	245.1	178.09	205.168	226.58	257.57	223.78	205.168	221.16	283.3	205.167	202.45	208.14	205.168	227.28	241.77	268.91	205.169	243.94	223.15	205.167	278.55	239.07	205.169	270.99	298.71	205.167	272.39	239.04
205.869	297.13	275.41	281.75	205.869	251.48	267.16	205.869	260.82	303.78	205.865	207.25	239.9	177.58	205.867	224.69	257.01	218.31	205.869	220.75	283.63	205.868	202.75	212.5	205.868	227.45	242.84	278.22	205.869	243.02	223.8	205.867	277.76	239.13	205.868	269.86	299.58	205.868	272.34	250.63
206.569	296.2	277.49	282.86	206.568	251.85	267.44	206.569	282.33	303.97	206.569	208.71	236.73	176.4	206.567	224.19	258.99	211.23	206.567	220	283.31	206.568	202.74	212.19	206.568	228.59	242.86	273.63	206.569	243.71	223.78	206.567	278.23	238.38	206.568	268.86	300.34	206.568	271.62	252.17
207.269	294.94	273.89	282.71	207.268	251.26	266.86	207.268	280.38	304.42	207.268	208.93	237.25	174.66	207.267	222.94	265.95	208.79	207.269	228.1	283.05	207.264	206.3	207.33	207.269	227.09	243.23	270.25	207.27	243.32	223.64	207.267	277.57	239.89	207.268	268.66	301.28	207.268	272.47	246.87
207.969	295.85	269.36	282.92	207.968	251.33	267.06	207.97	272.87	303.44	207.968	210.52	237.9	174.05	207.967	222.03	261.91	207.96	207.969	226.96	281.77	207.968	203.92	206.36	207.969	227.4	242.67	266.74	207.968	243.58	223.41	207.967	286.91	239.29	207.968	268.93	301.43	207.963	271.38	237.77
208.668	297	268.54	283.75	208.67	250.44	267.2	208.669	262.68	302.8	208.669	210.49	239.26	175.96	208.667	222.48	259.24	208.06	208.669	221.32	280.82	208.664	204.85	201.03	208.668	226.84	242.81	265.59	208.669	242.7	223.67	208.668	288.89	237.95	208.668	268.75	306.46	208.667	272.41	236.33
209.368	298.35	269.26	283.47	209.368	250.64	267.32	209.371	260.46	303.23	209.364	210.43	238.71	176.68	209.368	222.7	259.07	207.55	209.369	219.76	280.31	209.368	204.26	200.51	209.368	226.8	243.02	265.49	209.368	243.18	224.39	209.367	281.59	239.2	209.367	268.3	311.74	209.367	271.96	236.61
210.068	296.43	270.3	283.9	210.068	258.27	267.2	210.069	261.34	303.71	210.068	207.03	239.71	175.83	210.068	221.73	258.32	207.47	210.068	220.55	281.19	210.068	202.9	200.82	210.07	227.84	243.16	264.26	210.068	242.81	224.79	210.067	280.25	238.07	210.069	267.87	310.4	210.067	272.17	236.13
210.769	293.85	270.76	283.62	210.768	260.76	268.09	210.769	267.58	293.5	210.77	205.03	239.73	176.28	210.769	223.47	258.02	207.81	210.768	221.33	279.56	210.767	200.18	202.06	210.768	227.78	242.39	264.42	210.768	243.28	224.76	210.767	278.49	239.72	210.767	269.43	307.06	210.767	270.86	237.12
211.468	297.87	270.49	283.8	211.469	255.46	268.04	211.468	266.14	294.76	211.468	203.83	240.23	175.97	211.469	226.88	257.7	210.19	211.469	221.24	278.99	211.469	199.65	200.45	211.469	226.7	242.67	265.07	211.468	242.86	228.17	211.467	276.93	237.53	211.468	269.09	302.44	211.467	270.97	238.65
212.168	296.95	270.83	284.26	212.169	256.72	267.7	212.17	265.77	293.8	212.168	203.89	239.84	176.78	212.167	227.49	258.07	220.77	212.169	220.83	284.97	212.168	200.29	201.57	212.168	227.04	242.18	266.02	212.168	243.4	237.41	212.167	275.71	239.85	212.168	268.96	303.06	212.169	271.52	239.13
212.868	299.31	270.66	284.87	212.868	253.76	267.37	212.869	265.89	295.02	212.869	205.36	240.32	178.06	212.867	227.5	262.71	221.9	212.868	220.72	284.89	212.866	200.68	200.7	212.868	226.87	242.93	265.71	212.87	242.97	235.14	212.868	275.83	239.71	212.868	269.2	301.76	212.867	271.68	239.68
213.57	297.36	271.15	284.95	213.57	250.25	267.88	213.569	265.85	292.98	213.568	206.65	240.67	178.65	213.567	225.67	258.77	219.19	213.568	220.87	282.5	213.564	201.01	200.36	213.568	227.23	242.03	265.73	213.568	243.42	224.68	213.567	276.1	240.2	213.568	269.53	300.92	213.569	271.22	238.87
214.27	304.97	270.23	287.63	214.27	249.63	269.25	214.27	265.95	293.69	214.268	209.57	240.9	180.08	214.267	223.68	258.41	211.59	214.268	220.84	283.2	214.264	201.08	200.26	214.268	227.38	242.16	266.82	214.267	243.91	221.24	214.267	276.97	238.73	214.268	269.35	300.17	214.267	271.7	239.66
214.969	320.64	271.67	287.77	214.968	251.26	277.45	214.97	266.28	294.69	214.967	209.98	240.34	192.46	214.968	222.9	258.25	207.48	214.97	220.63	281.86	214.963	201	200.47	214.968	227.03	242.52	266.36	214.969	243.42	220.48	214.967	276.85	238.68	214.969	269.73	300.43	214.969	271.99	239.51
215.669	301.78	275.33	283.84	215.668	250.84	270.86	215.668	265.84	294.74	215.669	209.27	240.53	188.79	215.668	222.6	258.12	207.93	215.669	227.05	280.8	215.669	201.15	201.09	215.668	226.35	242.63	266.93	215.669	243.15	220.63	215.668	276.83	238.88	215.67	268.34	300.57	215.669	272.29	239.03
216.368	306.3	279.33	281	216.368	250.96	268.13	216.367	265.44	293.95	216.367	205.13	240.71	193.38	216.368	222.28	256.68	207.39	216.369	225.13	280.96	216.369	201.98	201.77	216.369	226.79	242.92	266.87	216.369	243.01	221.26	216.369	277.79	238.71	216.367	268.71	301.22	216.369	272.64	239.44
217.069	301.73	274.34	282.7	217.067	251.11	266.02	217.069	266.25	294.09	217.067	206.25	241.18	194.16	217.067	221.78	256.85	207.29	217.068	220.78	279.91	217.068	201.36	201.74	217.068	226.58	241.98	267.03	217.067	243.61	222.21	217.066	276.72	239.92	217.067	269.56	301.01	217.069	271.34	239.81
217.769	295.37	270.43	282.42	217.769	251.01	265.65	217.768	265.7	295.53	217.769	202.99	242.68	191.12	217.769	221.98	256.66	207	217.768	220.05	279.88	217.768	201.82	201.8	217.769	225.3	242.12	267.73	217.769	243.38	222.61	217.769	277.27	239.62	217.769	269.11	301.45	217.769	272.25	239.9
218.469	295.22	270.77	282.17	218.469	250.68	266.94	218.468	265.74	298.44	218.467	204.62	244.69	187.26	218.468	221.72	260.69	207.1	218.468	219.75	279.75	218.468	201.74	202.47	218.469	224.82	242.78	267.44	218.469	242.18	222.36	218.469	277.78	242.25	218.467	274.6	301.87	218.469	271.26	239.05
219.169	296.92	270.59	282.78	219.169	251.01	267.81	219.168	266.15	307.45	219.168	207.55	240.43	185.24	219.167	224.83	262.67	206.79	219.168	220.09	278.65	219.168	202.24	203.07	219.17	226.17	242.26	274.29	219.168	243.09	222.88	219.169	277.76	240.62	219.167	283.89	301.91	219.169	271.42	239.72
219.869	295.37	270.96	282.97	219.869	250.78	268.14	219.868	266.25	304.5	219.868	207.31	236.59	184.18	219.868	226.06	259.16	216.46	219.868	220.67	280.16	219.866	202.42	203.27	219.868	225.19	241.9	274.88	219.868	242.41	223.81	219.869	280.92	276.11	219.867	282.7	301.5	219.869	272.58	239.31
220.569	297.83	270.4	282.95	220.569	250.73	268.07	220.568	266.03	299.93	220.567	207.37	236.16	184.13	220.568	225.13	257.49	221.86	220.568	222.06	281.06	220.568	201.95	203.92	220.568	225.82	242.29	270.98	220.568	242.52	224.27	220.568	290.56	274.46	220.569	276.75	302.05	220.567	272.28	239.73
221.269	301.51	270.99	283.64	221.269	250.96	267.46	221.268	266.04	297.28	221.267	206.97	237.51	177.35	221.269	223.85	257.58	222.96	221.269	223.82	280.21	221.266	202.09	203.7	221.268	224.89	242.53	275.61	221.268	242.87	224.3	221.27	285.13	273.68	221.268	272.21	301.79	221.269	280.34	238.73
221.968	311.21	270.39	283.42	221.97	251.14	268.01	221.968	266.26	294.74	221.967	205.26	238.21	176.08	221.968	223.58	256.62	217.98	221.971	221.16	282.14	221.967	201.89	203.65	221.968	224.96	246.92	275.4	221.97	243.16	224.6	221.968	280.16	260.5	221.969	269.72	301.9	221.967	273.02	239.31
222.668	309.49	270.38	284.01	222.67	251.14	267.38	222.67	266.44	296.42	222.669	204.58	239.1	174.63	222.67	223.19	256.29	211.48	222.668	220.12	283.22	222.669	202.29	203.72	222.67	224.49	252.75	272.89	222.668	241.91	224.35	222.668	279.53	257.51	222.667	269.47	301.64	222.668	266.77	238.61
223.37	296.43	271.68	284.42	223.371	255.18	267.36	223.369	266.64	294.75	223.367	206.5	239.83	173.1	223.368	222.37	256.17	208.31	223.37	221.64	281.91	223.369	202.83	203.97	223.365	225.24	251.59	270.52	223.368	242.29	224.31	223.368	275.37	256.62	223.367	269.36	301.43	223.368	263.14	238.45
224.068	301.84	271.63	284.35	224.068	260.89	266.91	224.069	266.51	296.43	224.068	206.15	240.15	176.02	224.069	222.21	256.94	207.63	224.068	221.17	281.38	224.069	202.46	204	224.069	224.81	244.06	273.47	224.068	242.81	224.27	224.068	275.44	249.99	224.069	268.59	301.61	224.067	262.73	248.31
224.77	296.76	271.77	284.72	224.77	260.14	267.26	224.764	266.68	294.61	224.77	208.56	239.91	175.04	224.769	222.07	260.61	206.95	224.769	221.78	280.11	224.765	202.58	203.98	224.769	225.04	239.87	271.38	224.769	253.24	224.74	224.77	275.44	238.52	224.767	269.3	310.82	224.767	264.82	251.59
225.467	297.99	271.43	284.44	225.468	260.11	266.68	225.466	266.84	294.3	225.467	210.19	240.92	177.05	225.47	221.75	259.36	206.96	225.47	220.64	280.67	225.465	202.32	203.21	225.469	225.06	236.23	269.14	225.469	247.67	224.55	225.468	278.36	245.04	225.467	268.86	307.54	225.467	265.14	247.92
226.169	296.36	271.48	285.35	226.168	252.06	271.44	226.168	267.66	294.08	226.169	209.94	240.42	174.95	226.168	222.01	257.65	207.35	226.168	220.65	279.92	226.165	202.9	202.16	226.169	224.67	236.34	269.28	226.169	244.34	224.52	226.169	278.58	235.03	226.167	269.02	299.25	226.169	265.22	241.32
226.868	297.14	271.64	285.47	226.87	250.25	270.11	226.87	267.3	294.3	226.868	205.28	240.49	174.03	226.869	222.2	256.82	206.81	226.868	225.1	281.23	226.865	207.55	202.94	226.869	225.88	238.42	269.35	226.869	243.7	224.78	226.869	277.61	231.3	226.867	268.54	296.74	226.867	266.07	236.43
227.567	298.66	272.3	288.44	227.57	251.06	267.55	227.568	267.01	293.75	227.57	206.07	240.73	176.22	227.569	225.24	256.32	209.94	227.569	223.19	281.38	227.569	209.74	203.14	227.569	224.64	238.32	268.53	227.567	241.31	224.19	227.567	277.12	232.2	227.568	268.51	297.82	227.569	267.64	233.82
228.268	298.06	272.21	284.84	228.269	250.89	267.94	228.269	266.64	293.1	228.268	208.54	240.35	174.42	228.267	227.05	256.11	219.63	228.269	221.11	281.87	228.264	205.46	203.41	228.269	224.77	239.09	268.35	228.268	240.58	224.62	228.267	277.4	234.78	228.268	268.9	296.99	228.268	268.31	235.17
228.968	298.7	272.82	281.69	228.969	250.93	266.76	228.97	266.97	293.79	228.97	206.58	239.95	173.31	228.969	227.29	256.27	220.76	228.97	220.09	285.53	228.964	203.55	203.72	228.97	224.98	239.49	267.68	228.968	241.3	225.08	228.967	277.91	234.61	228.968	268.98	298.56	228.968	268.48	236.55
229.669	299.29	278.52	283.27	229.669	251.37	266.1	229.67	266.92	295.4	229.669	208.71	239.74	172.66	229.669	228.29	256.84	219.09	229.668	219.4	286.86	229.668	201.43	203.84	229.668	224.39	239.37	268.31	229.667	241.95	224.76	229.667	278.16	235.46	229.668	269.87	298.98	229.669	268.89	236.9
230.367	299.67	274.69	283.09	230.369	251.18	265.92	230.369	266.27	294.51	230.369	209.68	240.2	173.32	230.369	225.68	263.5	212.97	230.368	219.84	283.55	230.366	200.19	203.77	230.37	224.36	241.26	267.7	230.367	242.24	224.25	230.367	277.48	236.36	230.368	268.12	300.35	230.367	270.5	238.07
231.069	301.01	270.23	283.52	231.069	250.13	266.93	231.069	282.58	294.94	231.067	208.2	239.92	176.19	231.067	225.18	261.13	208.31	231.07	220.44	282.77	231.064	202.55	206.12	231.068	223.4	240.98	267.81	231.068	242.48	224.58	231.068	277.73	238.08	231.068	277.65	300.23	231.067	269.93	239.24
231.767	299.8	269.33	283.3	231.769	250.62	267.27	231.769	274.96	294.3	231.768	209	244.11	179.91	231.769	223.45	257.31	206.71	231.768	220.58	282.08	231.768	200.7	208.77	231.768	224.01	241.48	267.93	231.768	242.56	224.05	231.768	278.32	239.35	231.767	285.66	300.75	231.767	270.13	239.49
232.469	299.31	270.18	283.66	232.47	251.09	267.29	232.468	273.24	294.3	232.47	208.78	245.8	181.03	232.467	222.32	256.93	207.05	232.469	220.22	281.04	232.47	200.42	204.14	232.468	223.61	241.48	268.43	232.468	243.03	224.15	232.469	277.44	238.69	232.469	285.43	301.51	232.467	271.09	238.91
233.168	299.19	271.98	284.13	233.169	251.08	266.32	233.168	268.2	294.63	233.17	208.44	239.37	185.5	233.169	222.18	256.58	206.67	233.169	222.54	280.85	233.169	201.52	202.57	233.17	224.32	241.58	268.59	233.168	242.77	224.59	233.169	277.44	240.02	233.167	280.85	301.31	233.168	270.44	238.91
233.868	301.04	271.98	284.44	233.869	250.8	266.98	233.869	266.54	293.98	233.868	203.43	236.54	185.03	233.869	222.14	256.07	206.3	233.869	220.79	280.21	233.869	201.73	203.2	233.869	225.04	241.68	268.54	233.869	242.81	225.62	233.865	277.47	239.07	233.867	273.71	300.46	233.869	271.22	238.57
234.568	296.43	272.24	284.32	234.568	251.27	267	234.569	265.23	301.22	234.568	199.76	235.64	182.46	234.569	222.39	255.86	207.35	234.569	221.54	279.99	234.569	201.5	200.27	234.568	225.61	241.22	268.35	234.567	243	224.55	234.567	278.71	239.06	234.567	269.34	300.36	234.568	270.33	238.73
235.27	298.58	272.03	285.29	235.269	251.2	266.38	235.268	265.71	305.24	235.268	199.09	236.82	179.54	235.269	221.9	255.79	218.43	235.269	220.99	280.27	235.269	201.49	201.68	235.268	226.47	241.48	268.92	235.268	243.21	224.81	235.268	291.74	237.72	235.269	269.36	300.78	235.27	270.71	238.65
235.968	297.65	272.63	284.47	235.969	251.67	266.02	235.97	265.67	297.72	235.969	203.97	237.31	175.45	235.968	222.27	258.55	219.71	235.969	220.42	281.92	235.97	201.92	201.4	235.968	224.38	242.49	268.6	235.968	243.7	224.74	235.968	285.78	238.89	235.969	268.84	300.9	235.968	270.56	239.02
236.67	298.18	272.57	285.24	236.669	251.36	266.77	236.668	265.5	297.58	236.67	204.26	237.78	174.32	236.67	225.84	260.39	218.64	236.668	220.28	284.46	236.668	201.31	202.05	236.67	223.56	241.8	267.37	236.668	243.3	224.69	236.669	282.16	239.33	236.667	268.36	309.43	236.668	270.7	238.94
237.367	305.94	274.97	285.6	237.369	251.34	277.25	237.368	265.11	296.1	237.368	205.48	238.68	173.84	237.368	226.39	258.04	215.01	237.37	219.97	283.92	237.369	201.41	202.69	237.368	223.63	242.28	268.9	237.368	244.12	224.33	237.368	277.26	239.19	237.37	269.45	303.79	237.368	270.85	238.27
238.069	314.44	281.45	285.53	238.068	251.31	267.54	238.068	264.33	297.78	238.068	206.78	238.94	172.97	238.068	227.11	256.87	210.77	238.068	219.89	283.41	238.071	201.53	202.33	238.068	223.52	242.24	268.8	238.068	242.95	225	238.07	275.1	239.72	238.068	269.71	301.57	238.068	269.92	238.9
238.768	302.7	278.64	285.14	238.768	251.2	268.69	238.77	264.33	296.76	238.77	207.66	239.47	175.66	238.768	225.88	256.38	207.9	238.77	220.3	281.85	238.77	201.72	203.46	238.768	223.79	241.48	269.23	238.768	243.18	223.92	238.768	275.11	238.97	238.768	270.32	298.13	238.769	270.19	239.38
239.468	304.93	271.44	285.1	239.468	251.97	268.24	239.468	265.01	297.19	239.468	206.94	239.69	174.74	239.47	224.47	256.37	207.5	239.469	219.37	281.13	239.47	203.44	207.2	239.469	223.83	242.76	269.38	239.468	244.55	223.42	239.47	275.89	238.99	239.468	269.46	298.26	239.467	270.14	238.5
240.17	302.05	270.51	285.27	240.168	251.83	266.52	240.169	264.88	295.9	240.169	206.71	239.74	174.85	240.168	223.72	255.67	207.64	240.169	219.51	280.35	240.164	200.93	204.08	240.169	223.89	242.58	269.09	240.168	243.38	224.06	240.168	276.98	238.79	240.166	269.66	298.51	240.17	271.34	238.22
240.87	302.86	272.32	289.02	240.868	251.3	266.52	240.869	265.32	296.06	240.869	201.88	239.24	175.22	240.868	222.65	256.19	206.86	240.869	219.54	280.43	240.868	202.95	204.01	240.869	224.89	242.16	269.34	240.868	243.9	224	240.87	277.35	238.78	240.867	270.62	299.1	240.864	270.31	238.02
241.569	301.4	272.14	290.89	241.568	253.08	266.14	241.569	265.94	297.34	241.569	200.7	243.74	174.89	241.568	222.07	256.17	207.01	241.569	219.92	279.88	241.568	201.13	203.23	241.569	250.68	242.55	268.34	241.567	244.01	223.33	241.564	276.55	239.68	241.566	269.94	299.71	241.569	269.67	237.94
242.267	299.34	272.28	285.66	242.268	259.02	266.01	242.269	266.13	294.16	242.269	205.51	243.37	174.23	242.269	221.91	258.99	219.02	242.269	231.61	279.14	242.27	200.55	202.25	242.269	259.66	252.15	268.47	242.267	243.35	223.55	242.269	276.65	238.76	242.267	270.24	300.02	242.264	278.17	237.88
242.969	299.14	272.24	281.87	242.97	259.71	266.55	242.968	265.54	293.58	242.969	206.36	240.86	174.49	242.969	222.2	261.96	220.99	242.969	231.38	280.18	242.965	200.88	202.38	242.968	258.33	250.62	268.01	242.969	243.51	226.92	242.968	277.15	240.49	242.968	270	300.64	242.968	272.24	237.79
243.667	296.35	272.36	282.86	243.669	261.43	266.29	243.668	266.28	293.81	243.669	207.62	237.01	174.49	243.668	226	258.17	220.12	243.669	221.56	280.8	243.665	200.83	202.28	243.67	249.48	247.32	268.67	243.667	251.18	238	243.668	276.61	239.93	243.668	268.94	300.22	243.667	268.5	237.74
244.367	298.1	272.91	284.25	244.369	253.77	265.61	244.368	265.66	294.78	244.369	208.19	236.85	174.48	244.368	227.03	257.36	214.17	244.368	217.89	287.28	244.368	200.81	202.42	244.369	250.59	243.65	268.25	244.369	248.42	237.81	244.366	276.63	241.88	244.368	269.87	300.46	244.368	261.19	237.97
245.067	299	272.91	283.18	245.069	249.89	265.37	245.07	265.28	294.42	245.069	206.72	237.12	175.31	245.068	225.13	257.61	209.82	245.068	217.55	282.93	245.068	200.55	204.01	245.069	248.95	237.24	267.4	245.067	246.79	235.67	245.064	276.87	257.23	245.068	270.2	300.35	245.068	262.52	249.69
245.769	299.94	274.92	284.35	245.768	249.45	265.87	245.768	265.54	293.95	245.768	206.72	238.68	176.38	245.768	224.56	257.35	207.76	245.768	217.83	281.06	245.768	200.72	201.82	245.769	236.42	234.82	267.84	245.768	245.7	224.58	245.763	276.95	268.46	245.77	269.75	300.36	245.768	263.92	251.48
246.467	300.02	276.08	284.88	246.468	249.67	265.93	246.47	265.97	294.69	246.468	201.3	238.55	178.88	246.468	223.13	256.76	206.85	246.468	217.83	279.72	246.469	201.41	203.63	246.469	230.81	234.46	268.13	246.468	242.12	220.38	246.463	276.73	275.91	246.468	269.97	301.21	246.469	264.28	249.04
247.167	301.11	274.88	284.41	247.168	249.04	265.34	247.168	265.71	294.48	247.169	207.22	239.03	184.88	247.168	221.88	255.94	206.75	247.168	218.71	279.56	247.169	201.5	202.03	247.169	228.6	235.97	267.98	247.167	242.13	218.19	247.163	277.1	279.98	247.17	269.86	299.92	247.163	265.99	239.18
247.869	296.83	270.62	285.19	247.87	249.39	266.04	247.868	265.47	293.11	247.869	203.56	239.12	182.85	247.869	222.08	255.9	207.19	247.868	219.12	279.14	247.865	201.38	204.11	247.869	228.25	237.31	268.41	247.869	241.99	219.49	247.863	276.95	274.71	247.869	271.06	300.62	247.867	266.79	235.67
248.568	298.49	269.6	285.41	248.57	248.64	265.44	248.568	265.75	293.49	248.569	203.36	238.84	181.65	248.569	221.83	256.97	206.57	248.569	219.51	278.88	248.565	201.74	202.88	248.569	227.53	238.17	267.89	248.569	242.68	218.51	248.568	277.06	266.26	248.569	270.3	300.02	248.569	266.61	234.87
249.267	309.69	270.6	285.57	249.268	249.39	264.95	249.27	265.68	294.33	249.269	203.85	239.79	185.15	249.268	221.97	262.92	207.24	249.269	219.8	279.55	249.264	201.1	202.59	249.27	227.64	238.91	267.75	249.269	242.79	219.43	249.266	277	251.86	249.268	272.25	300.36	249.268	267.79	235.31
249.967	308.45	272.32	285.57	249.968	249.82	265.2	249.968	265.48	296.55	249.971	207.18	239.24	182.96	249.968	221.97	258.55	207.56	249.968	220.79	278.08	249.966	201.53	203.23	249.97	226.61	239.1	273.29	249.967	242.64	219.99	249.968	277.44	254.27	249.969	271.86	301.77	249.968	268.43	236.81
250.667	309.1	272.08	285.79	250.668	248.97	265.42	250.668	265.02	296.11	250.669	207.13	238.67	182.91	250.668	222.03	257.85	220.1	250.668	221.49	279.68	250.666	201.2	203.1	250.669	226.73	240.34	276.42	250.667	242.16	220.77	250.668	277.61	256.91	250.669	269.51	301.55	250.669	268.53	237.84
251.367	303.78	272.39	285.46	251.369	249.27	264.85	251.369	265.6	297.04	251.369	207.28	239.4	183.66	251.368	227.79	257.62	221.02	251.368	223	280.8	251.364	201.47	202.5	251.369	226.26	240.5	272.16	251.367	242.29	221.5	251.368	277.29	253.83	251.368	270.89	301.58	251.369	269.59	237.71
252.067	299.07	272.52	286.36	252.069	249.36	264.6	252.068	265.45	296.3	252.068	208.15	239.69	184.28	252.068	227.28	256.43	219.07	252.068	220.46	281.03	252.064	201.43	202.75	252.067	225.83	240.85	266.73	252.068	242.68	221.57	252.068	278.09	244.09	252.07	269.84	300.69	252.069	268.89	239.41
252.767	300.93	272.77	286.47	252.769	248.77	264.8	252.768	265.52	295.1	252.77	207.58	242.89	180.39	252.77	225.82	256.21	215.08	252.768	219.51	285.05	252.768	201.69	202.76	252.767	225.97	241.42	270.62	252.767	242.92	221.95	252.768	276.89	240.68	252.769	270.07	300.54	252.769	268.95	239.84
253.468	301.8	273.13	286.14	253.469	249.06	265.3	253.47	265.78	293.88	253.468	206.76	244.89	175.74	253.468	224.39	255.95	208.91	253.468	218.36	281.08	253.468	201.59	202.15	253.469	226.26	241.62	267.98	253.467	242.88	222.61	253.469	278.12	242.06	253.469	270.24	299.5	253.463	270.4	239.7
254.168	296.81	273.73	286.46	254.169	249.18	265.51	254.168	265.66	294.21	254.17	206.15	241.06	176.58	254.168	224.7	255.69	206.67	254.168	218.76	280.03	254.168	201.73	202.69	254.169	225.6	244.35	267.11	254.169	243.21	222.96	254.163	277.88	236.36	254.168	270.38	300	254.168	270.45	239.54
254.867	297.25	274.38	286.42	254.869	249.09	265.37	254.869	265.68	293.59	254.87	202.59	237.33	174.18	254.868	223.27	256.85	206.97	254.869	219.03	279.04	254.868	201.53	202.94	254.868	225.74	247.99	266.73	254.867	243.46	223.67	254.865	277.98	238.15	254.869	271.51	311.39	254.87	269.55	238.47
255.569	297.24	273.48	288.52	255.57	249.17	275.75	255.567	265.47	292.56	255.568	201.78	237.22	175.09	255.568	222.6	255.91	206.67	255.568	219.66	278.94	255.567	201.92	202.88	255.568	225.31	242.83	266.46	255.569	243.5	223.21	255.567	277.68	238.37	255.569	271.64	306.83	255.569	269.01	238.58
256.27	297.26	274.05	291.24	256.269	248.97	272.91	256.27	264.49	292.2	256.267	203.19	236.34	174.79	256.268	222.23	260.22	206.99	256.27	221.17	278.43	256.269	201.5	202.16	256.268	225.81	238.08	267.07	256.267	244.12	222.76	256.263	277.69	238.88	256.269	270.79	300.85	256.269	269.66	238.35
256.969	297.42	273.82	289.55	256.967	249.48	268.62	256.97	264.51	292.77	256.967	205.03	236.8	174.85	256.968	222.44	260.07	206.72	256.97	220.97	278.12	256.968	201.06	201.35	256.968	225.13	236.09	266.59	256.967	243.51	223.71	256.963	278.26	239.11	256.97	270.65	294.34	256.965	269.59	238.53
257.67	297.33	274.01	284.11	257.669	250.04	268.34	257.669	264.47	293.54	257.668	208.34	237.63	174.98	257.668	221.96	255.69	217	257.67	220.2	279.56	257.668	201.59	202.24	257.668	225.52	237.79	266.35	257.664	242.67	223.96	257.667	277.5	239.28	257.67	270.01	294.38	257.669	268.93	239.01
258.369	304.18	273.83	283.62	258.367	249.69	266.32	258.368	264.25	294.39	258.368	207.23	238.01	175.82	258.367	221.79	255.76	221.88	258.368	220.43	279.86	258.368	201.4	203.03	258.368	225.32	238.93	266.2	258.368	242.91	223.51	258.367	278.17	240.34	258.368	270.29	295.06	258.369	269.3	237.74
259.069	305.08	273.77	283.53	259.068	249.65	268.48	259.069	264.78	293.12	259.068	207.14	238.25	176.99	259.067	222.44	255.42	220.16	259.068	220.04	279.34	259.068	200.92	202.79	259.069	225.69	239.18	266.47	259.069	243.5	223.95	259.068	278.3	241.27	259.068	270.74	294.73	259.069	268.7	238.32
259.769	308.13	273.43	283	259.768	249.2	266.39	259.769	265.02	294.01	259.768	206.93	238.76	177.7	259.768	223.99	255.59	213.75	259.768	220.15	282.27	259.769	201.24	203.02	259.769	224.96	239.71	266.57	259.768	242.48	224.57	259.768	279.09	239.44	259.767	270.4	296.78	259.769	269.39	238.19
260.47	300.13	274.38	284.27	260.467	249.72	265.66	260.468	265.22	303.67	260.468	206.95	239.2	175.36	260.468	225.33	255.45	207.26	260.47	219.13	280.81	260.469	201.47	202.99	260.47	239.84	239.63	266.01	260.468	243.36	224.68	260.468	277.85	240.09	260.469	269.03	297.71	260.469	269.03	237.91
261.17	300.68	280.38	284.09	261.168	249.51	266.33	261.169	264.63	296.98	261.168	206.1	239.55	176.45	261.168	225.77	255.56	206.68	261.17	219.72	278.91	261.169	201.2	203.31	261.169	257.05	240.76	266.53	261.169	243.54	223.99	261.164	278.24	241.01	261.167	269.64	299.25	261.168	269.52	237.88
261.87	299.2	278.11	283.79	261.867	248.56	265.82	261.867	264.54	296.82	261.868	204.56	239.21	182.82	261.868	225.38	255.55	205.9	261.868	221.34	280.39	261.867	201.39	202.69	261.866	254.79	240.76	266.92	261.868	243.24	224.18	261.867	278.45	241	261.869	270	299.66	261.869	269.73	238.26
262.566	294.87	273.66	283.98	262.569	257.38	265.35	262.569	264.37	296.23	262.567	206.45	239.81	189.34	262.568	225.22	258.15	206.47	262.57	222.95	279.98	262.567	201.59	202.52	262.57	245.22	241.21	266.32	262.57	243.35	223.46	262.569	278.25	240.21	262.567	269.85	301.22	262.569	268.47	247.81
263.268	296.71	269.43	284.46	263.269	259.25	265.27	263.269	265.25	296.35	263.267	208.47	240.2	193.59	263.269	222.53	260.81	206.69	263.268	220.2	278.83	263.267	201.17	202.83	263.27	248.5	241.8	266.96	263.269	242.3	223.61	263.264	278.1	240.82	263.267	270.51	300.65	263.267	277.45	250.37
263.969	295.48	269.83	285.18	263.969	254.26	264.63	263.969	264.68	294.42	263.967	201.17	243.04	187.3	263.968	222.54	259.31	207.02	263.97	218.88	278.3	263.967	201.21	202.26	263.964	237.75	241.45	269.64	263.969	242.72	224.01	263.967	278.17	242.12	263.967	268.95	300.53	263.967	273.83	246.05
264.669	295.45	271.53	285.22	264.667	247.85	265.11	264.669	265.16	293.22	264.669	203.04	243.55	178.44	264.669	222.08	257.79	219.11	264.668	218.08	279.74	264.667	200.8	202.48	264.668	232.31	242.23	275.54	264.669	243.62	223.98	264.669	277.57	241.05	264.668	270.35	300.99	264.667	268.27	237.21
265.369	297.06	271.75	285.46	265.369	248.69	264.69	265.369	264.68	294.74	265.369	204.26	242.67	175.08	265.367	221.98	256.29	220.83	265.369	218.43	279.81	265.368	200.66	202.66	265.366	228.7	242.04	275.38	265.371	242.34	227.6	265.365	277.96	239.73	265.369	270.08	300.69	265.367	263.01	234.97
266.065	295.84	272.45	285.31	266.069	247.78	264.96	266.071	264.26	292.55	266.069	206.71	237.68	173.57	266.069	222.15	255.96	219.37	266.067	218.49	280.21	266.068	200.91	202.03	266.069	228.53	242.37	270.49	266.069	242.62	237.77	266.067	277.74	239.31	266.069	269.83	301.19	266.068	260.86	234.53
266.769	298.48	271.79	285.95	266.768	247.93	265.49	266.768	264.35	293.43	266.769	208.21	236.53	172.18	266.769	222.19	255.55	213.71	266.767	218.61	279.82	266.768	200.8	201.73	266.77	227.91	241.91	266.91	266.769	243.65	235.51	266.767	277.86	238.24	266.767	269.8	302.67	266.764	262.39	235.12
267.469	297.71	272.13	286.19	267.469	247.8	264.54	267.468	264.55	295.11	267.467	207.05	235.54	173.36	267.469	225.17	255.37	208.46	267.469	218.82	280.48	267.467	200.52	201.68	267.468	227.66	242.54	267.03	267.469	242.56	227.3	267.469	278.93	239.73	267.469	270.6	308.89	267.467	263.4	236.68
268.169	297.2	273.1	285.66	268.169	248.11	264.91	268.169	264.42	294.53	268.168	207.57	235.95	174.5	268.167	226.23	255.62	206.96	268.167	220.01	282.59	268.169	200.31	202.39	268.17	228.04	241.96	265.82	268.168	242.01	220.81	268.166	277.58	239.75	268.169	270.46	304.51	268.167	264.4	237.94
268.869	297.54	272.77	289.22	268.869	248.43	265.31	268.869	264.38	294.14	268.868	208.33	236.99	173.49	268.867	226.16	254.51	206.64	268.869	219.98	281.86	268.867	200.49	202.43	268.868	227.55	242.52	264.43	268.869	242.39	219.36	268.863	278.34	240.74	268.867	270.22	302.88	268.867	264.11	238.02
269.568	310.28	272.56	292.3	269.569	247.65	264.92	269.569	264.78	293.37	269.568	200.91	238.31	175.18	269.567	224.74	258.97	206.99	269.569	222.96	279.97	269.567	200.99	202.56	269.569	226.56	242.01	265.39	269.567	242.59	219.03	269.566	289.57	241.28	269.569	270.36	298.1	269.569	266.14	238.47
270.268	313.89	273.44	286.39	270.269	248.66	265.5	270.269	264.31	293.1	270.268	203.5	238.02	174.05	270.268	224.65	257.93	206.91	270.269	221.13	279.85	270.268	200.81	202.04	270.269	225.88	241.54	265.54	270.267	242.48	219.6	270.266	286.35	240.98	270.268	270.53	297.82	270.27	266.35	238.09
270.969	308.83	273.13	283.26	270.968	249.3	265.19	270.969	264.25	294.46	270.968	204.75	238.39	175.31	270.968	223.42	257.05	205.43	270.969	218.79	280.24	270.968	201.03	202.48	270.968	226.49	242.67	265.42	270.969	242.33	220.21	270.964	282.94	243	270.97	269.43	298.17	270.968	267.14	238.94
271.668	314.02	273.45	283.26	271.668	249.21	265.41	271.669	264.01	294.26	271.669	206.71	238.34	178.07	271.668	222.59	256.19	206.58	271.669	218.5	278.61	271.667	200.27	202.13	271.67	226.35	242.08	264.7	271.669	242.37	220.2	271.666	279.68	243.78	271.668	269.89	298.86	271.669	268.47	239.24
272.364	319.68	273.31	285.31	272.369	247.9	265.04	272.37	263.71	293.69	272.369	207.58	239.01	177.22	272.368	222.16	255.58	213.69	272.368	218.41	277.83	272.367	200.72	201.56	272.37	225.35	242.5	265.45	272.367	242.95	221.25	272.368	278.3	273.42	272.368	269.62	299.55	272.367	269.01	239.36
273.068	299.88	273.12	284.15	273.069	255	264.63	273.07	263.81	293.86	273.068	207.1	239.53	176.25	273.068	222.11	255.75	221.2	273.068	219.32	281.22	273.067	200.37	201.62	273.07	226.71	241.68	265.35	273.069	248.53	221.47	273.066	276.08	277.97	273.068	269.58	299.9	273.067	268.83	239.13
273.77	303.75	278.21	283.98	273.769	254.86	265.01	273.769	264.29	298.03	273.769	206.8	240.41	174.98	273.768	222.39	255.55	221.43	273.768	219.58	281.13	273.767	200.23	202.18	273.768	226.43	251.37	265.44	273.768	250.17	222.49	273.767	275.1	272.16	273.767	269.7	299.4	273.767	268.8	239.79
274.47	298.58	277.88	285	274.469	255.8	265.02	274.469	280.85	307.08	274.469	207.56	240.51	175.18	274.468	226.9	259.31	217.83	274.47	219.9	282.74	274.467	199.91	207.63	274.468	234.29	252.99	265.82	274.469	246.82	222.45	274.467	274.81	276.22	274.469	270.56	299.52	274.469	268.8	239.72
275.168	301.8	277	285.19	275.169	252.34	264.79	275.169	272.73	301.17	275.169	207.25	240.64	176.09	275.168	226.93	261.8	210.65	275.168	219.26	282.52	275.167	200.46	210.36	275.168	254.01	250.22	266.24	275.167	246.14	223.43	275.168	275.27	271.42	275.168	270.96	299.82	275.163	268.51	239.12
275.869	298.09	272.76	285.58	275.869	246.95	265.12	275.871	271.21	300.78	275.867	204.47	240.52	176.25	275.867	224.82	259.21	207.22	275.869	218.54	281.34	275.868	200.36	211.8	275.868	250.1	245.89	266.25	275.868	241.88	223.12	275.868	275.85	262.62	275.87	279.65	299.45	275.868	268.87	239.13
276.568	296.41	271.36	285.34	276.568	247.68	265.21	276.569	267.67	298.16	276.567	207.41	243.53	178.3	276.568	224.81	254.47	205.94	276.569	218.69	280.5	276.568	200.32	210.32	276.568	237.1	238.8	267.19	276.568	241.43	224.29	276.568	281.53	254.56	276.569	286.95	303.53	276.568	268.89	239.58
277.268	297.25	273.35	286.38	277.27	247.13	265.1	277.267	265.39	296.7	277.267	205.74	244.34	181.99	277.268	222.68	253.93	206.22	277.268	218.38	279.62	277.269	204.34	209.04	277.268	230.81	236.3	267.18	277.268	242.3	223.65	277.269	286.93	252.91	277.269	286.03	307.6	277.268	268.29	238.76
277.97	296.57	273.73	286.99	277.969	246.79	265.15	277.967	263.17	295.61	277.967	204.33	239.55	184.1	277.97	221.69	253.93	206.27	277.969	224.68	278.63	277.969	210.52	209.07	277.968	228.23	236.19	266.93	277.968	242.13	223.33	277.968	282.3	256.72	277.968	282.1	302.14	277.967	268.83	239.05
278.668	297.52	273.72	286.67	278.67	247.65	269.84	278.669	262.89	294.69	278.667	207.39	236.44	189.27	278.668	221.91	254.97	208.09	278.669	230.34	276.83	278.669	205.03	209.31	278.668	227.89	237.17	267.27	278.668	242.45	223.73	278.668	276.46	259.55	278.668	274.94	302.23	278.669	267.71	238.74
279.364	298.92	273.66	286.16	279.368	247.5	277.92	279.369	262.75	296.51	279.367	207.33	236.38	186.97	279.368	222.01	255.71	218.81	279.369	223.26	277.77	279.369	202.67	206.85	279.369	227.15	237.58	274.54	279.369	242.34	223.73	279.364	275.42	267.43	279.368	268.79	299.01	279.369	268.87	238.63
280.065	299.12	273.72	286.38	280.069	248.28	269.85	280.069	263.09	296.12	280.068	207.72	235.03	186.18	280.067	221.71	257.81	220.75	280.069	219.7	278.17	280.067	197.66	205.1	280.068	226.54	237.95	273.26	280.068	241.91	223.77	280.065	275.3	256.6	280.068	268.92	297.71	280.069	269	238.41
280.765	300.21	272.82	286.86	280.768	248.62	266.24	280.767	263.98	295.63	280.768	205.79	236.21	184.19	280.768	221.68	258.41	217.57	280.769	217.6	280.46	280.768	197.58	201.13	280.768	226.37	238.53	268.11	280.768	242.2	223.82	280.769	275.55	259.08	280.767	268.53	298.17	280.768	268.1	238.96
281.469	299.78	273.92	286.76	281.469	248.34	265.77	281.469	264.05	294.62	281.468	204.3	237.02	181.76	281.47	224.83	257.46	211.52	281.471	217.06	284.3	281.468	197.66	199.81	281.468	226.65	238.81	266.96	281.468	242.66	223.3	281.469	276.5	258.55	281.468	267.51	301.81	281.468	267.34	237.83
282.169	300.48	273.67	286.32	282.168	248.18	266.67	282.169	264.25	294.2	282.168	202.19	238.01	178.13	282.168	224.04	257.51	207.74	282.168	217.68	283.17	282.169	196.83	198.43	282.17	225.25	239.07	266.87	282.17	242.59	223.84	282.169	276.19	247.39	282.168	267.92	298.9	282.169	268.17	248.93
282.869	301.63	274.36	288.09	282.869	248.72	265.74	282.867	264.63	295.93	282.868	203.21	238.41	175.95	282.87	225.1	255.76	207.44	282.87	218.02	278.54	282.869	196.66	198.26	282.868	226.5	239.78	266.83	282.87	242.15	224.36	282.865	276.76	242.48	282.868	268.65	299.31	282.869	267.17	248.82
283.567	301.79	274.03	291.91	283.569	248.82	265.05	283.569	264.17	295.05	283.567	205.96	239.46	174.24	283.57	224.84	255.28	206.65	283.568	217.77	279.89	283.568	197.52	197.83	283.57	226.04	245.52	266.74	283.568	242.51	234.71	283.569	277.17	244.18	283.568	269.32	298.92	283.57	271.91	243.24
284.267	301.24	274.4	288.1	284.269	249.75	264.71	284.27	264.28	294.52	284.267	207.13	239.44	175.21	284.268	223.99	255.48	206.68	284.268	217.54	278.48	284.267	197.09	198.73	284.268	225.33	250.37	266.36	284.269	242.87	234.44	284.269	276.99	241.04	284.268	270.15	299.05	284.268	275.31	236.92
284.969	302.54	274.2	284.65	284.969	249.1	264.85	284.968	264.49	295.57	284.968	207.2	239.63	173.48	284.968	221.71	255.33	206.89	284.969	219.05	277.88	284.97	199.73	198.83	284.97	225.58	244.71	265.97	284.969	242.96	229.25	284.969	276.85	241.07	284.968	268.82	298.02	284.968	266.92	235.34
285.669	300.36	274.34	284.63	285.669	248.31	264.64	285.668	264.14	294.85	285.669	206.91	239.39	173.16	285.67	221.09	255.25	207.66	285.668	220.69	278.52	285.668	203.54	199.58	285.67	225.97	237.18	265.84	285.669	243.12	220.28	285.669	277.51	239.31	285.667	269.99	299.18	285.668	264.08	233.29
286.369	297.98	274.57	285.49	286.369	248.67	264.13	286.368	264.45	293.07	286.367	206.29	239.25	174.32	286.369	220.6	256.52	213.23	286.369	223.36	276.7	286.367	200.38	199.69	286.37	225.53	236.86	270.41	286.369	243.53	218.87	286.369	277.02	239.26	286.367	270.29	298.35	286.368	260.58	233.71
287.069	297.25	275.3	284.43	287.069	249.11	264.52	287.068	263.94	294.6	287.069	205.28	239.72	176.58	287.07	221.04	261.12	221.43	287.069	222.77	277.99	287.068	199.68	199.74	287.068	225.54	238.96	274.93	287.069	243.54	219.05	287.069	277.36	239.22	287.068	269.84	297.98	287.068	261.36	234.62
287.768	301.22	275.15	285.08	287.769	249.47	264.39	287.768	264.04	293.43	287.77	205.17	239.85	178.89	287.77	221.85	257.76	219.7	287.769	219.09	278.76	287.768	198.78	199.64	287.768	225.78	239.95	270.8	287.77	243.12	218.42	287.768	277.22	238.69	287.768	270.44	298.13	287.768	261.59	236.33
288.47	300.27	280.25	286.03	288.468	249.51	263.98	288.468	263.68	295.37	288.467	203.29	240.65	182.73	288.47	226.76	254.48	216.84	288.47	218.02	282.76	288.47	199.03	200.23	288.47	224.79	240.4	268.75	288.468	243.78	219.51	288.468	278.08	241.17	288.468	281.05	297.83	288.468	262.07	211.66
289.168	301.4	279.48	285.78	289.17	248.65	264.97	289.169	263.12	295.2	289.169	200.53	242.81	178.36	289.168	226.16	255.39	212.25	289.17	217.52	283.56	289.168	198.37	200.72	289.17	225.07	240.63	267.78	289.171	243.65	220.5	289.168	277.56	239.02	289.168	282.75	298.5	289.167	255.97	212.45
289.868	299.92	276.44	285.4	289.87	249.24	269.69	289.869	263.07	296.73	289.87	199.92	241.7	175.13	289.868	224.37	254.94	207.27	289.868	218.23	280.25	289.868	198.23	200.91	289.87	224.4	240.6	266.55	289.869	243.19	221.21	289.868	278.38	240.92	289.868	285.8	297.78	289.867	256.21	212.89
290.568	299.94	271.97	286.49	290.569	248.93	267.17	290.569	263.99	297.1	290.569	201.46	239.06	176.59	290.568	223.32	254.88	206	290.569	219.87	280.54	290.568	197.93	200.79	290.568	225	240.63	266.44	290.568	243.35	221	290.569	284.36	242.84	290.568	274.61	298.45	290.567	257.28	213.75
291.268	303.2	270.53	286.47	291.269	249.07	266.27	291.269	264.3	295.49	291.268	202.18	236.03	174.15	291.267	222.26	255.24	205.99	291.269	219.61	280.16	291.269	198.88	200.87	291.27	225.32	240.66	265.42	291.268	243.91	221.26	291.267	288.73	241.75	291.268	269.42	297.78	291.269	257.18	213.6
291.968	302.07	272.23	286.29	291.969	248.03	265.24	291.969	264.08	300.12	291.97	204.88	235.23	175.56	291.969	221.65	254.64	206.23	291.97	219.61	279.2	291.968	198.52	200.96	291.968	225.44	241.01	265.22	291.968	243.49	222.16	291.968	281.35	240.69	291.968	268.88	298.34	291.967	257.89	213.91
292.668	300.44	272.6	285.99	292.668	247.38	264.28	292.669	263.33	309.96	292.67	206.54	236.27	176.38	292.668	221.68	254.62	206.1	292.67	220.1	279.78	292.669	198.2	200.89	292.67	225.7	241.33	264.99	292.668	243.72	221.28	292.668	281.17	239.55	292.668	269.87	297.69	292.668	257.43	214.7
293.369	301.59	273.35	286.62	293.368	252.4	263.77	293.369	263.38	313.64	293.37	206.76	237.11	175.99	293.368	220.87	259.07	205.95	293.368	222.6	278.57	293.37	198.35	201.48	293.37	224.91	251.66	265.47	293.368	243.44	221.55	293.368	277.64	239.27	293.368	270.05	297.96	293.368	257.3	214.52
294.067	303.8	273.27	286.17	294.07	257.07	264.48	294.069	263.58	305.61	294.069	206.09	238.23	175.77	294.068	221.29	262.28	207.55	294.068	218.42	278.42	294.068	198.32	201.43	294.07	225.21	251.31	265.49	294.068	242.69	222.16	294.068	275.73	239.83	294.068	269.94	297.87	294.069	257.83	214.69
294.769	301.61	273.07	286.38	294.769	255.37	264.11	294.769	263.22	299.61	294.771	206.49	238.32	175	294.768	225.22	258.64	219.16	294.77	217.63	278.88	294.77	198.43	201.7	294.77	225.84	244.37	265.45	294.768	242.58	222.89	294.768	275.56	239.92	294.768	270.42	297.06	294.767	257.34	214.64
295.468	301.78	273.37	286.81	295.471	248.78	264.32	295.469	263.06	298.53	295.47	205.23	238.89	176.45	295.468	226.24	257.57	221.56	295.47	218.07	280.97	295.468	198.58	201.89	295.468	225.15	236.88	265.42	295.467	242.23	222.64	295.468	275.74	241.06	295.47	269.85	297.16	295.467	258.04	214.55
296.168	301.26	273.24	286.93	296.169	246.03	264.28	296.169	263.88	296.04	296.169	206.13	238.95	189.86	296.168	224.47	256.9	220.8	296.168	218.41	281.69	296.168	198.8	201.67	296.17	224.34	237.67	265.55	296.168	243	223.55	296.167	275.17	240.23	296.168	269.96	297.82	296.167	258.69	214.97
296.868	301.49	272.92	286.56	296.871	246.31	264.4	296.868	263.88	295.13	296.869	205.42	239.11	190.25	296.869	224.29	255.93	215.77	296.87	218.61	281.19	296.869	198.77	201.64	296.868	224.22	238.65	265.88	296.868	241.98	223.27	296.867	276	241.58	296.869	270.45	297.63	296.867	258.48	215.09
297.57	298.69	278.98	286.55	297.569	246.68	263.87	297.568	262.84	294.84	297.569	203.91	239.92	191.67	297.569	222.72	255.99	208.63	297.568	218.62	280.18	297.569	198.7	201.93	297.569	224.87	239.57	266.98	297.568	243.75	222.88	297.567	275.52	239.83	297.568	269.41	298.1	297.569	257.92	215.29
298.269	301.39	280.35	287.05	298.269	246.39	263.83	298.269	264.2	295.81	298.269	202.49	239.43	188.37	298.269	222.02	255.91	207.16	298.27	219.94	279.38	298.269	198.92	201.95	298.269	225.44	239.49	273.02	298.268	251.48	223.32	298.268	276.44	240.07	298.269	268.5	297.85	298.269	259.39	214.86
298.969	299.15	275.89	287	298.969	246.16	263.52	298.969	263.79	294.52	298.971	201.02	240.02	183.38	298.969	221.56	255.28	206.92	298.969	221.58	278.79	298.969	199.54	202.06	298.968	224.54	239.9	269.74	298.968	248.5	223.25	298.968	275.67	241.59	298.969	277.09	303.17	298.965	259.29	214.96
299.669	299.06	272.33	291.01	299.669	247.12	263.42	299.668	264.23	294.24	299.669	202.58	239.84	178.29	299.669	221.58	256.11	206.75	299.668	222.96	277.66	299.669	198.82	201.84	299.668	224.5	240.61	267.84	299.669	246.4	222.84	299.669	275.65	240.81	299.667	283.98	306.02	299.664	258.46	215.32
																					300.369	199.51	202.58	300.368	224.77	240.37	266.6	300.369	249.17	222.89
																					301.069	199.26	201.72	301.068	225.27	241.63	265.6	301.068	247.94	223.14
																					301.769	198.87	201.88	301.768	250.99	241.65	265.73	301.768	242.28	223.75
																					302.469	199.14	201.6	302.468	260.3	241.32	264.97	302.468	241.67	224.1
																					303.167	199.3	201.88	303.168	256.5	241.95	264.64	303.168	241.79	223.16
																					303.868	199.04	202	303.869	248.17	241.41	264.75	303.868	241.7	223.31
																					304.568	199.35	203.96	304.568	255.2	241.73	264.72	304.568	242.1	223.29
																					305.268	199.34	209.83	305.268	247.78	242.01	264.85	305.269	241.6	223.21
																					305.968	199.4	213.98	305.968	238.45	242.24	264.77	305.969	241.84	223.83
																					306.668	199.82	212.57	306.669	231.6	241.76	265.15	306.669	242.5	223.12
																					307.369	199.07	209.35	307.369	230.91	241.68	264.91	307.369	243.37	223.08
																					308.063	198.6	207.53	308.069	229.68	242.54	264.8	308.069	242.93	223.11
																					308.766	199.37	205.63	308.769	230.02	241.96	264.93	308.769	243.73	223.65
																					309.464	199.28	204.5	309.47	238.31	242.49	269.66	309.469	243.26	223.7
																					310.164	199.24	200.99	310.17	245.93	241.8	273.74	310.17	243.47	223.35
																					310.864	199.2	198.75	310.87	243.35	241.78	272.22	310.868	243.45	223.39
																					311.564	203.58	198.36	311.568	243.24	241.84	268.35	311.569	242.95	223.7
																					312.264	204.78	198.47	312.27	240.45	241.54	267.69	312.268	242.62	223.5
																					312.964	201.5	198.07	312.968	232.85	242.23	265.91	312.968	242.63	223.05
																					313.664	199.26	197.74	313.67	230.15	242.25	265.56	313.668	243.4	222.96
																					314.369	197.08	198.48	314.368	228.07	241.93	264.4	314.369	243.24	223.52
																					315.068	197	198.35	315.069	228.82	242.45	264.79	315.065	242.84	223.03
																					315.768	197.5	198.65	315.768	227.68	242.55	264.76	315.767	243.93	223.11
																					316.468	197.22	199.53	316.468	226.15	241.69	265.2	316.467	243.87	223.16
																					317.168	199.4	199.97	317.168	227.26	241.94	264.95	317.168	244.12	222.71
																					317.868	199.34	200.29	317.868	226.89	240.98	265.27	317.868	243.31	222.65
																					318.568	196.94	200.11	318.568	226.47	241.22	265.15	318.564	243.91	223.23
																					319.269	198.04	200.95	319.268	227.07	241.97	265.35	319.268	244.17	223.62
																					319.969	198.5	200.49	319.969	227.33	241.68	265.62	319.969	247.84	222.83
																					320.669	197.75	200.79	320.668	226.84	242.18	265.06	320.665	243.15	222.59
																					321.369	198.32	201.09	321.369	237.98	241.13	265.84	321.369	242.67	222.61
																					322.069	198.27	201.08	322.067	248.76	241.89	265.73	322.065	240.26	233.92
																					322.769	198.5	200.78	322.769	246.94	241.52	265.57	322.767	241.24	234.62
																					323.469	198.15	201.21	323.469	240.08	241.29	271.68	323.468	241.86	237.16
																					324.169	197.97	201.06	324.169	246.14	241.5	271.19	324.169	242.1	237.73
																					324.867	198.26	201.44	324.863	243.76	241.93	267.19	324.868	242.98	228.06
																					325.568	198.32	201.21	325.567	234.47	241.54	262.86	325.568	242.64	222.01
																					326.268	198.58	200.94	326.269	229.09	241.13	261.55	326.269	242.85	218.26
																					326.968	198.6	201.63	326.968	228.57	242.52	260.28	326.969	242.98	217.56
																					327.668	198.68	201.16	327.668	228.19	241.29	261.1	327.665	242.59	217.39
																					328.368	199.62	201.69	328.368	227.86	241.32	261.86	328.37	243.37	218.51
																					329.068	198.93	201.64	329.068	228.05	241.58	261.98	329.068	242.96	218.5
																					329.768	198.72	201.36	329.768	228.33	241.48	262.5	329.768	243.65	218.14
																					330.468	198.81	201.71	330.468	228.93	241.74	262.93	330.47	243.89	219.55
																					331.168	198.79	201.75	331.168	228.28	241.58	262.6	331.169	243.51	218.93
																					331.868	199.99	201.92	331.869	227.96	241.34	262.56	331.869	243.82	219.91
																					332.568	203.89	201.66	332.569	228.14	241.13	267.15	332.57	243.31	219.62
																					333.268	201.26	201.82	333.269	228.82	241.67	268.22	333.269	243.63	220.6
																					333.967	199.99	201.89	333.969	227.65	241.23	266.91	333.968	243.15	220.87
																					334.667	197.2	201.75	334.671	227.05	241.6	264.99	334.668	243.68	221.15
																					335.369	196.95	202.22	335.369	227.2	241.69	263.97	335.368	242.96	221.21
																					336.067	196.67	202.19	336.069	228.47	242.12	263.18	336.068	243.18	221.93
																					336.767	197.3	202.36	336.768	230.03	241.4	263.16	336.767	243.73	221.89
																					337.467	197.91	203.35	337.467	229	241.45	262.32	337.469	243.2	222.51
																					338.167	198.29	202.29	338.168	228.8	241.45	262.92	338.169	243.49	222.36
																					338.869	197.68	202.47	338.867	228.65	240.93	262.05	338.868	243.25	222.22
																					339.569	197.76	197	339.568	229.48	244.56	262.34	339.568	243.14	222.28
																					340.269	197.98	202.94	340.268	229.98	249.18	267.41	340.27	243.82	222.73
																					340.969	198.27	200.82	340.968	227.05	248.23	269.26	340.97	252.15	222.73
																					341.668	198.24	200.98	341.669	227.45	241.39	270.12	341.668	249.98	222.52
																					342.37	198.62	197.36	342.37	228.42	235.45	267.97	342.368	246.29	222.67
																					343.069	198.78	198.09	343.069	228.4	244.82	267.87	343.07	243.16	222.58
																					343.768	198.61	197.58	343.771	228.09	241.85	266.4	343.769	239.87	222.81
																					344.468	198.76	199.2	344.469	228.67	235.73	268.06	344.468	240.14	223.14
																					345.168	198.9	198.41	345.169	231.22	236.57	266.3	345.168	240.51	223.2
																					345.868	198.82	196.93	345.869	248.83	239.65	263.86	345.868	241.28	222.54
																					346.57	199.3	197.8	346.569	252.38	235.4	263.83	346.568	241.35	222.83
																					347.269	199.22	198.34	347.269	254.67	234.72	263.87	347.268	241.89	222.86
																					347.969	198.94	198.86	347.968	243.03	235	263.36	347.968	242.4	222.87
																					348.669	198.76	199.5	348.669	236.45	234.77	262.68	348.668	242.35	222.55
																					349.368	198.81	199.8	349.369	230.78	235.29	262.14	349.37	240.97	223.02
																					350.068	198.66	199.68	350.069	228.73	235.53	262.53	350.07	242.56	222.9
																					350.769	198.83	200.2	350.769	227.99	236.3	262.52	350.77	242.93	222.49
																					351.465	198.51	200.26	351.469	227.65	236.23	262.42	351.468	243.04	222.89
																					352.168	198.65	200.74	352.169	227.11	237.19	262.86	352.168	243.18	222.89
																					352.87	198.55	200.53	352.87	228.6	237.45	263.01	352.868	243.09	223.08
																					353.57	198.7	200.77	353.568	227.49	238.15	262.85	353.568	242.76	222.8
																					354.27	198.73	200.63	354.27	228.46	237.75	262.65	354.271	243.39	227.14
																					354.964	199.22	201.02	354.968	228.91	238.33	262.68	354.97	242.77	235.66
																					355.67	199.03	201.53	355.67	227.9	239.06	263.27	355.667	243.14	233.27
																					356.368	199.32	202.06	356.37	227.99	239.09	263.26	356.367	247.69	225.37
																					357.07	199.06	201.56	357.07	227.81	238.87	271.63	357.069	246.83	219.4
																					357.769	198.56	201.78	357.768	227.96	239.17	268.68	357.768	244.96	218.71
																					358.465	198.77	201.25	358.469	231.38	238.5	265.52	358.47	244.2	217.47
																					359.169	198.68	201.1	359.168	232.88	238.62	261.21	359.168	240.11	216.98
																					359.869	198.52	201.18	359.868	230.46	239.12	259.18	359.868	240.72	218.28
																					360.569	198.33	201.27	360.568	230.08	239.49	259.44	360.568	240.81	218.4
																					361.269	198.71	201.55	361.268	229.69	238.84	259.15	361.27	241.27	218.43
																					361.969	198.43	200.82	361.968	229.19	238.52	259.76	361.968	241.97	219.03
																					362.668	198.35	200.94	362.67	228.76	239.61	259.58	362.668	242.18	220.01
																					363.369	198.66	201.78	363.368	228.85	238.75	259.96	363.368	241.7	220.22
																					364.07	208.06	201.74	364.068	231.67	239.56	261.01	364.068	242.22	220.53
																					364.768	205.92	202.34	364.769	244.08	252.65	261.21	364.768	242.59	220.65
																					365.468	201.41	202.12	365.469	249.02	250.81	261.73	365.468	242.73	220.73
																					366.17	198.43	202.21	366.169	239.99	248.34	261.17	366.169	243.15	220.8
																					366.868	196.93	202.49	366.869	230.92	239.25	261.52	366.867	243.5	221.22
																					367.568	195.9	201.68	367.569	228.23	233.84	261.05	367.569	243.05	221.25
																					368.269	196.06	202.26	368.269	227.1	232.16	261.78	368.267	242.31	221.22
																					368.967	196.69	202.45	368.968	226.98	233.01	265.52	368.969	242.71	221.78
																					369.669	197.15	201.66	369.668	226.69	234.04	267.17	369.668	242.02	221.7
																					370.369	197.53	198.92	370.368	227.15	234.88	266.73	370.37	242.87	221.74
																					371.069	197.2	198.82	371.068	227.08	234.34	263.71	371.07	242.79	222.15
																					371.768	197.64	198.91	371.77	227.07	235.19	263.42	371.769	242.36	222.14
																					372.468	197.22	198.68	372.468	227.34	235.65	263.07	372.469	243.25	221.81
																					373.168	197.08	199.22	373.168	227.68	235.64	262.61	373.169	243.06	222.06
																					373.869	197.25	200.07	373.868	227.59	236.21	261.93	373.869	242.71	222.33
																					374.568	196.95	200.32	374.569	227.49	236.99	261.67	374.569	242.5	221.69
																					375.268	197.35	200.18	375.27	227.86	236.97	261.81	375.268	242.25	221.37
																					375.968	197.27	200.81	375.97	227.92	237.8	261.56	375.968	242.2	221.85
																					376.668	197.35	200.46	376.67	228.43	237.33	261.1	376.67	242.11	221.62
																					377.37	197.22	200.84	377.368	227.77	237.92	261.73	377.368	242.42	222.48
																					378.068	197.61	201.04	378.07	227.48	237.87	261.44	378.068	244.99	222.21
																					378.769	197.39	201.04	378.768	227.37	237.73	261.67	378.768	250.87	222.92
																					379.469	197.73	200.58	379.467	228.8	237.47	261.5	379.468	249.32	233.37
																					380.168	198.06	201.09	380.167	228.25	237.81	261.1	380.168	244.43	232.92
																					380.868	198.13	200.92	380.868	229.2	238.16	261.18	380.869	242.02	227.55
																					381.568	197.41	201.67	381.568	228.19	238.69	262.23	381.568	241.6	220.35
																					382.268	198.08	201.43	382.268	227.18	238.44	270.48	382.268	241.03	217.69
																					382.968	197.86	201.56	382.968	226.99	238.63	267.5	382.969	240.62	217.12
																					383.669	197.53	201.3	383.668	225.92	244.61	265.3	383.67	240.39	217.66
																					384.369	198.02	201.44	384.369	227.03	248.14	260.86	384.368	241.49	218.33
																					385.07	197.24	201.28	385.068	227.68	247.1	258.66	385.07	241.1	218.91
																					385.768	199.4	201.08	385.769	226.58	246.25	258.5	385.769	241.7	219.04
																					386.468	204.51	201.8	386.469	226.79	246.06	258.46	386.469	241.88	219.26
																					387.168	197.3	201.38	387.169	226.69	242.96	259.02	387.169	242.01	219.98
																					387.868	197.27	201.39	387.867	226.66	235.52	259.42	387.869	242.02	220.79
																					388.568	195.29	200.97	388.569	226.28	235.36	260.7	388.569	242.74	220.63
																					389.267	196.17	201.56	389.269	227.01	234.91	260.53	389.269	242.53	220.55
																					389.967	196.04	201.85	389.969	225.28	235.3	261.02	389.969	242.02	221.01
																					390.668	196.05	201.97	390.669	224.61	234.66	260.85	390.67	242.92	220.91
																					391.368	196.36	201.43	391.369	225.22	235.59	260.93	391.37	242.53	221.62
																					392.068	196.56	201.86	392.069	225.35	236.25	260.72	392.069	242.47	221.16
																					392.768	196.08	201.8	392.769	225.57	236.22	260.76	392.77	243.16	221.17
																					393.468	196.66	203.22	393.469	225.56	237.12	261.09	393.469	242.75	221.2
																					394.168	196.2	207.61	394.169	225.89	236.99	260.24	394.171	242.24	221.26
																					394.867	196.87	205.42	394.869	226.11	237.43	260.25	394.871	242.07	221.18
																					395.568	196.67	205.43	395.569	226.09	237.87	260.05	395.571	241.66	221.73
																					396.268	197.01	200.04	396.269	225.72	237.5	260.54	396.269	242.2	229.52
																					396.968	196.69	198.64	396.969	225.11	238.12	260.95	396.969	243.18	233.9
																					397.668	197.33	198.81	397.669	225.36	237.88	261	397.668	243.02	230.48
																					398.368	197.1	198.24	398.369	225.62	238.72	261.31	398.368	242.41	220.58
																					399.068	197.35	198.45	399.069	224.79	238.4	261.15	399.068	241.84	218.84
																					399.768	197.33	199.43	399.767	225.17	238.37	261.37	399.768	242.45	216.74
																					400.47	197.48	199.56	400.468	224.82	239.24	262	400.468	242.22	216.8
																					401.169	197.87	199.45	401.168	225.47	238.47	261.5	401.169	242.21	217.7
																					401.868	197.57	200.45	401.869	225.28	238.52	261.22	401.869	242.11	218.79
																					402.568	199.19	199.84	402.568	224.05	238.06	261.2	402.57	242.41	219.38
																					403.268	204.06	200.55	403.268	224.11	238.61	261.25	403.269	242.29	219.8
																					403.969	197.09	200.48	403.968	224.52	238.85	260.5	403.968	241.43	219.6
																					404.668	195.65	200.69	404.668	223.4	238.12	260.7	404.669	249.63	220.46
																					405.369	196.38	200.47	405.369	223.78	238.51	261.44	405.369	247.6	220.12
																					406.07	196.7	200.9	406.069	223.06	238.55	265.81	406.069	246.98	220.52
																					406.769	196.62	201.32	406.768	223.55	238.82	269.18	406.769	240.95	220.1
																					407.47	196.8	200.71	407.469	223.41	238.47	264.53	407.469	241.25	221.03
																					408.167	196.82	200.51	408.168	223.38	238.79	260.3	408.169	245.42	220.72
																					408.87	197.13	200.68	408.868	223.47	246.68	257.24	408.869	243.15	220.79
																					409.568	196.76	200.76	409.57	223.49	252.33	256.91	409.569	240.63	220.98
																					410.269	196.81	201.07	410.268	224.16	250.23	256.38	410.269	241.56	220.82
																					410.969	196.69	201.24	410.97	223.09	250.17	257.83	410.969	241.55	220.44
																					411.668	197.15	201.33	411.668	223.45	247.16	258.13	411.669	241.65	220.73
																					412.369	196.65	201.28	412.371	224.78	237.54	258.37	412.369	242.18	220.66
																					413.069	196.68	201.26	413.069	224.04	233.98	259.32	413.068	242.47	220.36
																					413.769	196.69	201	413.769	222.78	233.14	258.69	413.768	241.83	221.08
																					414.469	196.87	201.08	414.469	222.47	233.96	258.95	414.468	241.5	220.88
																					415.169	196.76	200.88	415.169	222	233.5	259.5	415.17	241.69	220.07
																					415.87	196.79	201	415.869	222.99	234.65	258.97	415.868	241.67	220.63
																					416.568	196.77	200.87	416.569	222.75	235.33	259.08	416.57	241.52	220.82
																					417.268	196.97	200.85	417.27	223.68	235.3	259.13	417.268	242.34	220.54
																					417.968	197.17	200.9	417.968	222.66	236.21	259.61	417.968	242.34	220.59
																					418.668	197.27	200.55	418.67	223.71	236.02	259.44	418.667	242.79	220.42
																					419.368	197.2	200.56	419.368	223.5	236.12	259.85	419.367	242.4	221.01
																					420.068	196.89	200.68	420.07	222.82	237.04	259.18	420.068	243.16	220.77
																					420.769	197.26	201.66	420.768	222.32	236.92	259.65	420.767	243.36	227.86
																					421.469	196.78	203.32	421.468	222.13	237.43	259.79	421.467	242.29	233.15
																					422.168	197.13	199.74	422.168	221.32	237.76	260.44	422.167	243.23	230.59
																					422.868	196.98	200.57	422.868	222.01	238.61	259.75	422.869	243.74	222.18
																					423.568	197.21	203.23	423.569	223.03	238.35	266.31	423.569	243.1	218.93
																					424.268	197.29	199.61	424.268	222.21	238.15	264.89	424.269	242.01	216.97
																					424.97	197.11	199.8	424.97	222.4	238.62	263.93	424.968	246.1	216.02
																					425.668	198.53	197.89	425.668	222.26	238.42	266.66	425.668	248.55	216.45
																					426.37	205.58	198.2	426.368	222.21	238.44	267.38	426.367	246.29	216.81
																					427.07	198.02	198.28	427.068	222.11	237.57	265.09	427.069	245.37	217.06
																					427.769	196.69	199	427.768	222.21	238.07	262.19	427.769	240.3	218.16
																					428.469	194.85	198.62	428.469	222.6	240.64	260.15	428.469	241.43	218.17
																					429.168	195.43	199.32	429.17	222.06	248	260.7	429.169	241.12	219.18
																					429.87	194.91	199.02	429.869	221.41	249.57	260.49	429.867	241.49	219.73
																					430.568	195.78	199.18	430.569	222.14	241.54	260.56	430.569	242.15	219.95
																					431.268	196.01	199.76	431.269	227.58	239.04	260.13	431.268	241.65	220.46
																					431.968	197.37	199.73	431.969	250.22	233.37	259.63	431.969	241.24	219.95
																					432.669	197.42	199.86	432.669	256.35	237.77	260.12	432.667	240.9	220.67
																					433.369	195.8	199.7	433.368	246.42	238.37	259.64	433.369	242.02	220.08
																					434.069	196.12	199.93	434.069	236.93	235.01	260.25	434.069	242	220.73
																					434.769	195.1	199.37	434.768	229.79	234.13	259.71	434.769	242.03	220.47
																					435.469	195.77	199.26	435.468	227.27	233.69	260.19	435.469	242.48	220.04
																					436.167	195.53	199.65	436.168	225.86	234.26	260.33	436.17	242.53	220
																					436.868	195.68	199.12	436.868	225.31	235.15	260.39	436.869	242.67	220.03
																					437.568	195.89	199.99	437.569	224.27	235.11	260.01	437.569	242.88	220.6
																					438.269	196.27	199.66	438.269	223.26	235.7	260.38	438.269	242.12	220.63
																					438.968	196.33	199.32	438.969	224.27	235.93	260.99	438.967	242.86	220.55
																					439.669	196.22	199.49	439.669	224.38	236.16	260.51	439.667	242.55	224.26
																					440.369	196.58	199.19	440.368	223.86	236.21	261.06	440.367	243.46	234.28
																					441.069	196.33	199.77	441.068	223.5	236.89	260.74	441.068	249.94	233.98
																					441.77	196.14	199.54	441.768	224.02	237.86	260.44	441.768	247.19	226.73
																					442.466	196.95	199	442.468	222.91	237.57	264.29	442.468	244.96	219.6
																					443.168	196.42	199.39	443.168	223.87	237.29	269.25	443.169	239.54	219.14
																					443.868	195.89	199.34	443.869	223.76	237.25	268.45	443.868	239.89	217.34
																					444.569	196.48	199.16	444.567	224.42	237.06	266.94	444.568	240.36	216.76
																					445.269	196.35	199.33	445.269	223.15	237.05	259.33	445.268	241.02	217.11
																					445.969	196.59	199.48	445.968	222.64	236.92	260.04	445.968	240.94	218.25
																					446.669	196.53	200.14	446.668	222.43	237.32	259.47	446.67	240.86	218.49
																					447.365	196.7	200.22	447.368	222.97	237.3	259.16	447.369	240.15	219.01
																					448.069	196.88	200.21	448.068	223.12	237.31	258.84	448.07	240.66	219.11
																					448.769	197.24	200.17	448.768	223.35	237.55	259.2	448.768	240.84	219.76
																					449.465	197.08	199.99	449.469	223.05	237.76	259.32	449.47	240.88	220.15
																					450.168	196.47	199.95	450.167	222.8	237.18	260.17	450.17	241.42	220.1
																					450.87	196.77	199.74	450.868	222.37	238.11	259.57	450.87	242.23	219.74
																					451.57	197	199.83	451.568	222.65	237.7	259.66	451.571	241.63	220.03
																					452.268	196.77	199.51	452.268	223.18	249.16	259.69	452.269	242.49	220.62
																					452.964	196.56	199.3	452.968	223.8	249.8	259.44	452.968	242.19	221.79
																					453.668	196.16	199.79	453.668	223.39	243.9	259.25	453.668	242.03	231.73
																					454.366	196.79	199.23	454.369	223.82	233	258.93	454.37	242.18	231.19
																					455.067	196.48	197.39	455.069	224.16	231.58	259.23	455.07	241.98	222.13
																					455.769	203.44	198.21	455.768	223.38	232.57	260.59	455.77	242.27	218.43
																					456.467	204.28	195.85	456.468	223.24	233.06	268.88	456.468	242.47	216.97
																					457.167	198.58	194.49	457.168	222.35	233.88	266.68	457.171	242.56	215.69
																					457.867	193.4	196.81	457.868	222.52	234.78	263.74	457.871	242.82	216.31
																					458.567	193.9	194.95	458.568	222.64	234.85	261.83	458.57	243.19	217.03
																					459.268	193.72	194.7	459.268	222.64	235.58	259.65	459.268	252.53	217.9
																					459.968	193.78	194.08	459.969	222.93	235.67	258.99	459.968	248.36	218.24
																					460.667	194.09	194.47	460.67	223.68	236.16	259.08	460.668	246.13	218.87
																					461.368	194.4	194.59	461.37	224.06	236.53	258.79	461.368	242.07	219.25
																					462.068	194.32	194.76	462.07	222.78	236.26	258.79	462.069	239.44	223.26
																					462.768	194.69	195.61	462.77	223.04	236.99	259.61	462.768	240.35	230.5
																					463.468	194.81	195.93	463.468	222.39	236.55	259.46	463.468	239.57	230.78
																					464.167	194.62	196.12	464.17	222.25	236.85	259.59	464.164	240.12	222.11
																					464.869	194.85	196.34	464.869	222.93	236.64	259.31	464.868	240.23	218.68
																					465.568	195.84	197.37	465.569	222.8	236.27	259.87	465.568	241.33	216.93
																					466.269	195.66	196.91	466.269	222.37	236.47	267.58	466.268	241.13	215.55
																					466.969	195.28	197.49	466.968	223.26	236.9	267.08	466.968	241.61	216.56
																					467.668	196.19	197.41	467.669	222.38	237.18	263.23	467.668	241.4	217.36
																					468.369	195.99	197.87	468.369	222.56	236.5	260.84	468.37	240.89	218.41
																					469.069	196.04	198.06	469.069	222.92	236.21	260.09	469.069	240.83	218.5
																					469.769	196.09	197.78	469.769	223.27	236.41	259.55	469.768	240.83	218.49
																					470.469	195.97	198.16	470.469	223.07	241.01	259.51	470.468	241.34	219.09
																					471.17	195.52	197.78	471.169	222.63	249.46	259.44	471.168	242.25	219.4
																					471.869	195.93	197.85	471.87	223.54	247.58	259.03	471.868	242.21	218.97
																					472.569	196.3	197.97	472.57	224.01	239.75	264.96	472.569	242.26	220.18
																					473.269	196.04	198.16	473.27	223.41	233.16	266.58	473.268	241.82	220.17
																					473.969	196.26	198.44	473.97	222.95	232.39	264.76	473.969	241.55	220.21
																					474.669	196.09	198.35	474.668	222.74	232.21	261.9	474.669	241.87	220.12
																					475.369	198.01	198.17	475.37	222.72	234.04	260.18	475.37	241.45	220.6
																					476.068	200.84	198.73	476.07	223.03	234.57	259.85	476.07	241.81	220.83
																					476.768	197.85	198.21	476.769	222.98	234.91	259.14	476.768	241.42	220.23
																					477.469	196.21	197.89	477.469	223.65	235.45	259.89	477.468	242.2	220.09
																					478.169	195.18	198.86	478.17	222.88	236	259.95	478.171	251.56	220.03
																					478.869	194	198.36	478.868	223.11	237.32	259.23	478.869	248.11	220.13
																					479.569	193.34	198.69	479.57	222.44	237.01	259.74	479.569	244.27	219.91
																					480.269	192.75	198.18	480.27	221.89	238.09	259.16	480.269	242.34	220.07
																					480.969	193.31	198.6	480.969	222.38	246.31	259.29	480.969	240.37	220.14
																					481.669	193.35	198.82	481.671	222.71	239.87	258.81	481.667	237.07	219.98
																					482.369	193.89	198.34	482.37	222.32	233.41	259.36	482.367	238.32	220.09
																					483.065	194.24	198.62	483.07	223.11	233.03	258.83	483.068	239.19	220.24
																					483.765	194.39	198.48	483.769	222.53	234.17	259.26	483.768	240.18	220.4
																					484.465	194.61	198.06	484.469	238.08	235.69	258.94	484.467	241.16	220.27
																					485.169	194.67	198.47	485.169	250.04	242.29	258.7	485.167	241.32	220.22
																					485.869	194.63	198.64	485.869	255.03	241.84	259.26	485.869	241.27	219.89
																					486.565	197.2	198.7	486.569	253.58	240.17	259.5	486.569	241.35	219.58
																					487.27	195.35	198.42	487.27	252.23	237.59	260.4	487.269	241.66	219.72
																					487.966	194.97	198.61	487.968	252.43	235.89	258.74	487.969	242.04	219.68
																					488.665	194.27	198.74	488.669	247.1	235.74	266.59	488.669	241.65	220.19
																					489.365	195.1	202.17	489.368	239.37	235.39	265.2	489.369	241.55	220.4
																					490.065	195.15	205.73	490.068	232.83	235.98	263.12	490.069	241.95	225.12
																					490.769	194.51	204.39	490.768	227.22	236.44	261.28	490.767	241.65	233.55
																					491.469	194.85	201.74	491.468	226.89	236.88	261.17	491.468	241.87	231.82
																					492.17	194.61	198.01	492.168	226.93	237.41	258.3	492.168	242.24	222.58
																					492.868	194.85	195.48	492.868	226.4	236.8	258.06	492.868	241.81	216.91
																					493.568	194.55	198.25	493.568	227.24	236.72	258.24	493.569	241.71	217.41
																					494.268	195.66	195.92	494.27	226.29	237.32	258.08	494.269	243.47	216.02
																					494.968	198.23	196.67	494.969	225.41	236.32	258.26	494.968	246.28	214.8
																					495.668	193.96	195.5	495.669	224.33	237.57	258.16	495.669	242.68	214.99
																					496.368	195.14	194.59	496.369	224.68	237.25	258.34	496.368	241.79	216.51
																					497.068	193.77	194.1	497.069	223.8	236.64	260.95	497.068	239.19	216.78
																					497.768	193.76	194.74	497.768	224.65	236.37	266.83	497.77	238.01	217.71
																					498.468	194.08	195.14	498.468	224.42	236.89	268.54	498.468	239.64	219.04
																					499.169	193.92	194.93	499.171	225.06	235.74	265.53	499.169	241.09	229.66
																					499.867	195.8	194.87	499.869	224.15	236.35	264.67	499.869	242.37	233.11
																					500.569	194.16	196.14	500.57	225.07	237.03	262.76	500.57	242.42	226.01
																					501.268	194.23	196.15	501.268	225.37	237.09	260.01	501.268	241.67	220.88
																					501.97	194.37	196.35	501.97	223.93	237.03	259.18	501.97	241.61	216.46
																					502.669	194.41	196.77	502.67	224.02	237.43	258.92	502.669	241.87	216.18
																					503.367	194.4	196.64	503.369	224.33	237.14	258.61	503.37	241.95	216.11
																					504.068	194.55	196.64	504.069	224.59	236.87	258.4	504.067	242.39	216.77
																					504.768	194.86	196.83	504.77	224.17	236.92	258.11	504.767	241.35	216.26
																					505.468	195.09	196.93	505.468	224.01	237.01	257.96	505.468	241.77	217.25
																					506.168	195.02	197.29	506.168	223.51	247.52	258.29	506.167	241.65	217.85
																					506.87	194.84	196.61	506.868	223.84	249.9	257.76	506.869	241.99	217.66
																					507.568	194.82	196.25	507.568	223.51	249.22	258.42	507.568	241.66	218.31
																					508.269	194.92	197.55	508.27	223.82	246.79	258.17	508.268	241.88	218.96
																					508.969	194.78	197.64	508.968	224.46	243.02	258.6	508.968	241.99	219.1
																					509.669	195.26	197.76	509.669	223.62	232.26	258.22	509.669	241.44	219.16
																					510.37	195.5	197.48	510.368	223.71	229.47	258.34	510.369	241.15	219.15
																					511.068	195.18	197.47	511.069	223.85	229.5	258.44	511.069	241.59	219.19
																					511.768	195.85	198.13	511.769	224	230.59	257.77	511.769	241.17	219.03
																					512.47	195.46	197.62	512.469	223.51	231.87	258.7	512.47	241.76	218.85
																					513.169	195.56	197.89	513.169	223.27	233.14	259.18	513.17	241.04	219.32
																					513.867	195.29	197.47	513.868	223.22	233.02	267.47	513.868	241.58	219.41
																					514.567	195.44	197.9	514.568	224.04	232.87	268.06	514.57	241.38	219.56
																					515.267	195.68	196.97	515.269	223.79	234.34	260.88	515.27	241.94	219.28
																					515.967	195.74	197.93	515.969	223.14	234.85	257.81	515.97	250.8	219.92
																					516.667	195.91	197.89	516.668	223.95	234.63	256.41	516.67	244.9	220.16
																					517.369	195.57	197.73	517.37	248.94	235.17	256.13	517.369	243.53	219.42
																					518.067	196.02	197.82	518.07	255.49	235.39	255.84	518.07	239.59	219.15
																					518.769	195.69	197.7	518.768	258.31	235.4	256.77	518.769	238.28	219.59
																					519.467	195.97	198.18	519.469	253.38	235.87	257.41	519.469	238.89	219.9
																					520.168	195.66	197.91	520.168	246.21	235.15	257.87	520.169	240.76	220.17
																					520.868	195.46	197.65	520.87	235.98	235.39	257.92	520.869	241.61	219.69
																					521.568	196.02	198.23	521.569	230.49	235.42	258.34	521.568	242.2	219.68
																					522.268	195.69	201.72	522.268	226.17	234.97	258.41	522.27	242.58	219.58
																					522.968	195.7	205.16	522.971	225.52	235.18	258.08	522.969	242.63	220.18
																					523.669	195.6	206.65	523.671	224.25	235.91	258.31	523.67	241.58	219.82
																					524.367	195.96	207.8	524.371	223.97	235.61	258.33	524.368	241.55	219.77
																					525.068	202.03	204.05	525.071	224.67	235.79	258.01	525.068	241.45	219.64
																					525.767	199.81	199.77	525.768	223.7	234.92	263.33	525.768	242.17	220.06
																					526.468	193.55	199.7	526.47	223.94	235.06	267.69	526.468	241.91	219.99
																					527.168	194.5	197.96	527.17	224.5	247.16	264.27	527.169	242.2	219.81
																					527.869	194.04	197.5	527.87	225.2	248.77	261.11	527.869	241.78	220.14
																					528.568	193.4	196.69	528.568	225.03	243.88	260.42	528.569	241.83	220.25
																					529.269	193.59	194.98	529.268	225.57	235.08	259.43	529.268	241.64	219.62
																					529.969	193.72	194.47	529.968	224.76	230.04	259.29	529.968	241.4	219.81
																					530.669	194.03	194.62	530.67	225.27	230.68	258.99	530.669	242.59	219.67
																					531.37	193.99	194.29	531.368	224.72	231.6	258.65	531.369	241.95	219.41
																					532.069	194.11	195.02	532.07	224.71	232.33	258.37	532.07	242.17	227.66
																					532.769	194.39	195.55	532.769	225.17	232.7	257.92	532.768	241.67	232.58
																					533.469	194.64	195.9	533.469	226.92	233.69	257.71	533.469	241.51	229.9
																					534.17	194.86	195.78	534.169	247.42	233.41	257.71	534.168	242.32	221.73
																					534.868	194.75	195.93	534.869	258.22	233.81	257.88	534.869	251.09	217.9
																					535.569	194.79	195.61	535.569	253.81	234.41	257.4	535.569	245.9	215.35
																					536.27	194.95	195.8	536.269	253.13	235.05	260.02	536.269	243.55	215.26
																					536.969	194.69	196.28	536.969	246.49	234.87	265.87	536.971	241.92	215.76
																					537.669	194.48	196.25	537.668	236.86	234.59	265.42	537.67	238.94	215.97
																					538.369	194.74	196.27	538.37	229.78	234.65	265.49	538.37	239.36	216.55
																					539.069	195.19	196.76	539.068	226.38	234.73	261.48	539.068	240.4	217.45
																					539.769	194.79	197.54	539.772	224.25	234.51	258.96	539.77	241.53	217.28
																					540.469	194.66	197.06	540.468	224.3	235.33	257.56	540.468	241.77	217.25
																					541.168	195.18	197.67	541.17	223.52	235.25	256.94	541.168	242.05	217.85
																					541.868	194.3	195.9	541.871	223.43	234.58	256.89	541.868	241.83	218.4
																					542.569	202.03	193.48	542.569	224.57	235.07	257.36	542.568	242.49	227.61
																					543.269	197.57	196.56	543.268	223.08	234.82	257.45	543.268	242.04	231.7
																					543.969	194.53	197.89	543.97	223.67	235.24	257.68	543.968	241.82	227.75
																					544.669	193.74	197.54	544.67	224.16	235.51	258.51	544.668	241.89	219.5
																					545.369	193.34	197.21	545.37	223.75	234.78	258.89	545.367	241.94	215.92
																					546.069	194.6	198.06	546.07	224.4	235.4	261.59	546.069	241.4	215.31
																					546.769	194.14	197.86	546.769	223.65	235.18	261.84	546.767	241.55	215.6
																					547.468	194.26	198.34	547.469	223.92	235.01	259.63	547.469	242.4	216.01
																					548.169	195.72	198.41	548.17	224.4	234.95	259.75	548.167	241.97	217.03
																					548.869	195.61	198.61	548.868	223.68	235.16	259.46	548.869	241.62	217.35
																					549.569	194.11	198.36	549.568	223.48	235.46	259.41	549.567	242.1	217.51
																					550.269	194.03	197.82	550.268	224.31	235.25	258.67	550.269	241.87	218.21
																					550.969	195.29	197.82	550.968	224.43	235.03	258.74	550.968	242.24	218.52
																					551.669	194.62	198.01	551.668	223.93	235.3	257.97	551.668	241.94	218.14
																					552.368	194.57	198.41	552.368	224.2	235.42	257.93	552.368	241.98	218.96
																					553.069	195.23	204.62	553.068	224.07	235.3	257.99	553.068	242.26	219.02
																					553.77	194.7	204.6	553.769	223.75	234.91	258.05	553.768	250.43	218.3
																					554.47	194.58	206.01	554.468	223.87	247.91	257.94	554.469	245.81	219.07
																					555.17	195.11	201.33	555.168	223.4	248.33	258.31	555.169	243.62	218.59
																					555.868	194.77	200.57	555.87	246.02	246.71	265.02	555.867	243.99	219.35
																					556.568	194.29	197.47	556.568	255.43	243.93	266.48	556.568	240.58	218.88
																					557.268	193.83	198.94	557.269	255.55	233.01	263.04	557.268	238.91	219.05
																					557.967	194.22	197.75	557.969	252.18	230.5	259.76	557.97	239.87	219.22
																					558.668	194.53	194.08	558.668	246.94	231.04	258.22	558.668	240.73	229.33
																					559.369	194.38	192.44	559.369	239.66	231.96	256.72	559.37	243.13	231.39
																					560.069	194.17	192.31	560.069	233.44	233.18	256.56	560.07	243.45	226.43
																					560.769	194.73	192.62	560.769	227.56	233.86	256.56	560.768	243.67	218.99
																					561.469	194.39	193.02	561.469	226.13	233.29	257.09	561.469	244.27	217.1
																					562.169	194.81	193.59	562.169	225.32	234	257.08	562.169	243.77	216.1
																					562.869	194.64	194.39	562.869	224.3	234.94	256.98	562.87	244.04	216.47
																					563.568	194.79	194.4	563.569	223.78	233.94	257.41	563.568	243.1	217.7
																					564.27	194.83	195.53	564.269	223.31	234.49	257.19	564.268	242.99	218.5
																					564.97	194.66	195.16	564.969	224	234.42	257.3	564.969	242.96	218.33
																					565.668	194.66	195.89	565.668	223.25	234.83	257.3	565.664	243.26	218.53
																					566.37	195.24	196.2	566.37	223.49	234.49	256.49	566.369	243.52	218.93
																					567.07	194.74	196.52	567.07	222.83	234.31	256.76	567.069	242.67	219.33
																					567.77	194.43	196.45	567.767	223.34	234.22	256.79	567.768	242.49	229.39
																					568.469	195.08	196.66	568.469	223.04	233.93	256.63	568.468	242.69	233.11
																					569.165	194.36	196.89	569.168	223.67	233.93	256.89	569.168	242.4	228.8
																					569.869	194.96	197.3	569.869	223.43	234.11	257.29	569.868	242.66	220.51
																					570.569	195.06	197.99	570.568	222.5	234.02	257.49	570.569	242.76	217.16
																					571.265	194.62	197.39	571.268	223.4	234.41	257.37	571.269	242.72	216.92
																					571.971	194.7	198.29	571.968	222.92	234.43	257.93	571.968	242.22	216.81
																					572.669	195.14	198.28	572.668	223.39	234.7	256.09	572.668	243.37	216.84
																					573.371	195.51	197.74	573.368	223.57	234.98	256.84	573.368	244.26	217.42
																					574.07	194.84	196.78	574.068	223.37	234.47	256.33	574.07	243.93	218.63
																					574.769	194.86	197.64	574.769	222.87	234.75	256.37	574.768	253.57	218.49
																					575.47	195.29	198.1	575.468	222.89	235.04	257.07	575.468	247.84	219.03
																					576.164	194.61	198.32	576.169	222.88	235.03	257.12	576.168	243.92	226.33
																					576.868	196.64	198.08	576.869	223.01	234.25	267.1	576.869	241.4	231.85
																					577.568	202.2	197.39	577.569	223.33	234.67	264.95	577.57	239.1	225.41
																					578.268	201.56	198.17	578.269	222.75	234.58	260.86	578.269	240.5	219.06
																					578.968	192.93	196.46	578.969	223.18	234.49	256.94	578.969	240.08	217.73
																					579.668	192.07	198.94	579.669	223.69	234.83	254.1	579.669	241.91	216.41
																					580.368	192.39	205.33	580.369	223.21	234.27	254.38	580.369	243.37	217.69
																					581.069	191.08	207.44	581.07	222.64	235.05	254.14	581.069	243.64	217.88
																					581.767	191.75	206.75	581.768	244.19	234.5	254.16	581.769	243.08	219.11
																					582.467	192.54	201.61	582.469	251.51	235.07	259.19	582.47	243.37	219.33
																					583.168	192.5	199.86	583.171	248.09	234.97	261.25	583.17	243.27	219.57
																					583.868	192.74	199.22	583.869	251.51	234.79	260.06	583.87	243.63	218.64
																					584.568	192.3	199.13	584.569	248.57	235.17	258.29	584.568	243.29	219.57
																					585.267	192.48	197	585.271	238.77	234.57	256.2	585.27	243.23	219.77
																					585.968	194.81	197.3	585.971	230.72	235.19	255.82	585.968	242.77	220.6
																					586.668	195.91	195.04	586.672	227.58	234.46	256.34	586.668	243.57	220.26
																					587.371	195.34	193.67	587.366	229.17	235.01	256.78	587.368	242.85	220.26
																					588.068	194.47	192.92	588.072	224.56	239.67	256.55	588.07	242.43	220.02
																					588.768	194.25	192.88	588.77	224.44	247.32	257.02	588.768	242.23	220.82
																					589.468	193.77	193.39	589.464	223.92	247.95	257.11	589.468	242.47	221.15
																					590.169	193.52	193.49	590.169	224.21	240.7	256.72	590.17	242.61	220.21
																					590.868	193.4	193.92	590.865	224.33	232.19	256.94	590.868	242.67	221.05
																					591.568	193.45	194.34	591.57	223.49	229.12	256.76	591.57	242.89	220.5
																					592.265	193.48	194.64	592.269	223.68	228.93	262.14	592.268	243.24	220.19
																					592.967	193.5	194.74	592.965	223.95	229.76	260.12	592.969	243.11	221.07
																					593.665	197.36	194.94	593.669	223.91	229.77	258.67	593.669	242.77	220.03
																					594.369	194.73	195.84	594.365	223.81	229.84	258.02	594.369	243.31	220.46
																					595.07	194.98	195.82	595.069	224.1	230.74	256.54	595.069	243.38	220.26
																					595.764	193.48	195.99	595.771	237.41	232.03	256.96	595.769	243.06	220.44
																					596.469	192.73	195.87	596.47	243.74	232.45	256.99	596.469	242.98	220.78
																					597.17	193.38	195.91	597.17	234.01	233.18	256.63	597.171	243.38	232.34
																					597.868	193.46	196.07	597.87	225.25	232.88	259.37	597.87	243.06	232.46
																					598.568	193.07	196.09	598.57	223.56	233.13	262.88	598.568	248.53	227.41
																					599.268	192.82	196.24	599.27	222.23	233.75	265.64	599.269	246.08	219.8
																					599.968	192.98	196.71	599.966	223.03	233.72	263.83	599.969	243.69	217.67

## Sheet: Figure 5-supplement 1C
H2O														CBX																				DMSO														18b-GA
Time [s]	#1 (Top)	#2 (Left)	#3 (Right)	Time [s]	#1 (Top)	#2 (Bottom)	Time [s]	#1 (TD)	Time [s]	#1 (L)	#2 (R)	Time [s]	#1 (TD)	Time [s]	#1_000	Time [s]	#1_001	Time [s]	#1_002	Time [s]	#1_003	Time [s]	#1 (L)_013	#2 (R)_013	Time [s]	#1_014	Time [s]	#1 (Left)_015	#2 (Right)_015	Time [s]	#1 (TD)_016	Time [s]	#1 (TD)_017	Time [s]	#1 (TD)	Time [s]	#1 (Top)	#2 (Bottom)	Time [s]	#1 (Left)	#2 (Right)	Time [s]	#1 (Top)	#2 (Bottom)	Time [s]	#1 (R)	#2 (L)	Time [s]	#1 (Left)
0.066	393.27	356.66	390.37	0.065	379.91	309.81	0.066	312.42	0.065	439.7	336.03	0.064	311.57	0.065	326.23	0.064	323.78	0.065	382.21	0.066	218.5	0.064	340.19	330.49	0.064	293.83	0.065	335	355.87	0.064	373.91	0.064	411.1	0.066	417.98	0.065	321.07	321.43	0.064	355.72	350.35	0.065	311.9	352.77	0.063	330.02	240.36	0.066	470.98
0.72	392.2	351.23	402.78	0.719	378.93	308.93	0.72	312.61	0.718	439.04	336.4	0.718	311.64	0.719	326.07	0.718	323.41	0.718	382.73	0.72	218.87	0.719	340.61	330.27	0.718	293.59	0.719	335.23	355.81	0.718	373.71	0.719	411.72	0.719	430.96	0.719	321.21	321.85	0.718	346.19	350.04	0.719	307.21	352.73	0.72	330.75	239.94	0.719	471.38
1.37	389.29	350.54	406.03	1.368	378.29	307.86	1.368	312.34	1.369	437.85	335.85	1.368	311.68	1.369	325.91	1.368	323.74	1.37	381.7	1.37	216.92	1.369	341.08	330.08	1.37	293.53	1.367	334.78	355.8	1.368	373.42	1.368	411.64	1.369	437.32	1.369	320.63	320.91	1.369	343.3	350.31	1.369	304.78	352.78	1.368	330.69	241.37	1.369	471.76
2.02	388.32	352.34	402.57	2.02	378.04	307.41	2.019	312.11	2.019	436.45	336.76	2.018	312.37	2.019	325.79	2.018	323.22	2.02	382.84	2.02	217.51	2.019	341.33	330.25	2.019	293.59	2.019	334.68	355.76	2.018	373.75	2.018	411.34	2.02	438.54	2.019	321.63	322.52	2.019	346.88	350.44	2.02	305.44	353.19	2.02	331.4	240.22	2.018	472.12
2.67	387.18	350.52	376.93	2.664	378.76	307.96	2.669	312.03	2.668	436.55	337.91	2.667	312.92	2.667	325.35	2.668	323.67	2.67	382.78	2.67	219.28	2.67	341.59	330.2	2.671	293.53	2.669	334.98	355.42	2.668	374.07	2.669	411.36	2.668	437.96	2.67	321.16	322.99	2.669	353.02	351.2	2.669	304.98	353	2.669	329.98	240.82	2.668	471.68
3.32	387.73	349.16	353.7	3.32	378.34	308.01	3.32	312.52	3.318	436.73	337.58	3.319	313.44	3.32	325.65	3.318	323.69	3.314	382.27	3.32	221.26	3.319	342.24	329.09	3.319	293.36	3.318	336.02	356.05	3.318	373.57	3.319	411.64	3.32	437.54	3.32	321.3	323.19	3.319	356.67	350.53	3.319	305.78	353.41	3.319	330.51	240.72	3.314	471.21
3.969	387.47	350.33	344.48	3.97	378.58	308.72	3.97	311.86	3.968	436.79	325.7	3.963	312.51	3.967	326.37	3.968	323.17	3.97	382.53	3.969	218.95	3.969	342.72	329.89	3.969	293.82	3.968	335.68	355.86	3.968	373.75	3.969	411.84	3.968	438.29	3.97	321.59	323.01	3.969	359.43	351.01	3.969	305.7	352.02	3.968	330.81	240.7	3.97	469.86
4.618	387.2	349.21	338.6	4.618	379	308.82	4.62	311.37	4.618	437.5	316.55	4.619	312.87	4.62	326.55	4.619	323.59	4.618	383.15	4.62	217.74	4.619	343.41	330.2	4.619	293.84	4.62	335.15	355.9	4.618	373.72	4.619	412.02	4.62	437.28	4.618	321.44	324.08	4.619	361.45	351.09	4.619	305.81	356.7	4.62	330.47	241.42	4.619	470.47
5.269	386.76	348.95	337.24	5.27	377.76	308.18	5.27	312.06	5.268	437.46	312.27	5.267	312.4	5.268	326.27	5.267	323.13	5.27	383.2	5.271	217.72	5.27	343.56	330.01	5.269	293.68	5.268	335.2	355.71	5.268	373.76	5.268	411.68	5.268	436.87	5.27	321.78	322.2	5.269	362.3	350.63	5.269	306	374.93	5.268	331.53	241.07	5.269	474.35
5.919	387.51	350.61	336.9	5.918	377.23	308.18	5.92	312.69	5.919	437.79	318.67	5.919	313.1	5.918	325.66	5.919	323.3	5.919	383.15	5.919	218.15	5.918	342.81	330.38	5.919	294.03	5.918	334.86	356.36	5.92	373.66	5.918	411.99	5.915	437.56	5.918	321.23	322.8	5.919	363.39	350.86	5.919	306.56	376.31	5.92	332.36	243.1	5.918	485.12
6.569	386.77	352.81	335.64	6.569	378.07	310.12	6.57	312.63	6.569	438.95	323.39	6.567	313.63	6.569	325.68	6.567	323.21	6.565	383.8	6.569	220.29	6.568	342.89	329.95	6.569	294.05	6.568	335.03	356.85	6.568	373.31	6.568	411.19	6.569	437.5	6.566	321.83	323.53	6.569	364.11	351.07	6.569	306.53	357.72	6.57	330.95	242.38	6.57	489.03
7.219	385.54	354.93	333.56	7.215	378.51	310.6	7.219	312.84	7.219	436.74	325.42	7.215	314.36	7.219	325.87	7.217	323.77	7.215	382.93	7.219	217.78	7.218	343.44	330.31	7.22	293.94	7.218	335.1	356.91	7.22	373.34	7.218	411.38	7.22	437.49	7.218	321.8	322.7	7.219	365.87	351.79	7.22	308.04	349.69	7.218	330.29	243.08	7.219	492.02
7.869	385.49	354.03	334.05	7.869	377.7	311.07	7.869	312.79	7.867	436.95	327.29	7.864	314.91	7.868	326.09	7.867	323.46	7.865	382.91	7.869	216.26	7.868	343.09	331.02	7.87	294.24	7.868	335.69	357.04	7.868	373.53	7.869	411.06	7.868	437.72	7.869	322.09	322.41	7.869	368.53	351.9	7.868	307.85	350.7	7.868	331.22	243.31	7.869	493.64
8.519	386.08	347.36	333.08	8.519	377.6	311.32	8.52	313.42	8.519	437.06	329.2	8.518	315.19	8.52	326.47	8.517	323.03	8.519	383.46	8.519	217.28	8.518	343.85	330.74	8.52	293.85	8.519	335.41	356.57	8.52	373.5	8.519	411.17	8.52	437.4	8.515	355.22	318.62	8.519	369.69	351.27	8.52	308.76	353.75	8.519	330.9	243.04	8.518	489.07
9.169	387.74	347.68	333.86	9.169	378.64	312.54	9.169	313.12	9.167	438.03	330.68	9.168	315.94	9.17	326.12	9.167	322.77	9.165	383.27	9.17	217.78	9.168	343.37	329.88	9.17	293.78	9.169	335.98	356.51	9.168	373.55	9.168	411.53	9.168	437	9.17	368.02	311.51	9.169	370.31	351.67	9.168	309.65	354.22	9.17	331.54	243.19	9.168	480.94
9.818	385.77	350.03	332.05	9.819	377.99	312.96	9.819	313.27	9.819	437.72	332.44	9.818	315.02	9.82	325.85	9.817	323.02	9.814	383.71	9.819	218.19	9.819	343.97	329.51	9.82	293.56	9.819	335.53	356.58	9.818	373.38	9.818	411.69	9.819	437.41	9.82	371.24	311.9	9.819	369.95	352.66	9.82	309.48	354.46	9.819	331.87	243.23	9.818	480.81
10.47	386.29	350.05	330.97	10.469	377.88	311.27	10.469	313.76	10.467	437.7	333.19	10.468	315.27	10.468	326.2	10.468	322.49	10.47	383.95	10.47	219.34	10.469	343.11	329.26	10.47	293.37	10.469	335.36	357.17	10.469	373.54	10.469	412.16	10.469	436.33	10.469	356.08	312.02	10.468	369.52	352.03	10.468	309.75	355.04	10.469	331.4	243.24	10.468	479.66
11.118	386.81	349.21	330.23	11.12	378.05	311.85	11.119	313.43	11.118	437.56	334.22	11.118	315.46	11.12	325.95	11.118	322.5	11.114	384.39	11.12	218.44	11.119	343.65	329.52	11.12	293.35	11.119	335.93	357.08	11.119	373.41	11.117	412.07	11.119	435.92	11.121	333.86	313.71	11.118	360.76	352.4	11.119	309.71	354.07	11.119	332.06	243.6	11.119	479.13
11.77	387.75	348.27	329.54	11.77	377.18	312.41	11.769	313.57	11.768	435.93	334.43	11.767	314.17	11.768	326.93	11.768	323.17	11.764	384.62	11.77	218.14	11.769	343.49	329.38	11.769	293.55	11.769	335.96	357.13	11.769	373.39	11.77	412.23	11.769	435.87	11.766	325.37	316.75	11.77	349.92	352.52	11.769	309.15	354.36	11.769	331.52	244.64	11.768	476.92
12.418	386.19	352.83	330.6	12.418	377.19	312.5	12.42	313.06	12.42	435.78	335.29	12.413	313.98	12.419	326.85	12.42	323	12.416	384.3	12.42	218.33	12.419	343.65	328.88	12.421	293.77	12.419	336.21	357.15	12.419	373.36	12.419	411.83	12.42	436.53	12.419	322.48	317.51	12.418	346.15	352.79	12.419	309.48	354.61	12.419	331.41	244.73	12.418	474.67
13.07	385.31	364.06	329.58	13.068	377.85	313.19	13.068	313.5	13.068	436.17	334.76	13.068	315.49	13.069	326.81	13.068	322.8	13.066	384.17	13.068	217.23	13.069	344.15	328.73	13.069	293.78	13.069	335.99	356.68	13.068	373.44	13.069	411.89	13.068	436.05	13.067	320.18	317.52	13.07	349.36	351.63	13.068	309.17	354.61	13.07	331.76	244.28	13.068	476.66
13.719	405.64	372.02	329.29	13.718	377.43	312.58	13.719	313.61	13.718	435.37	336.77	13.718	314.59	13.719	325.8	13.719	322.31	13.716	383.7	13.72	219.39	13.718	344.14	328.56	13.721	294.13	13.718	335.91	356.8	13.718	373.43	13.719	412.46	13.718	435.59	13.72	319.97	317.41	13.718	352.62	352.61	13.718	310.19	355.54	13.717	331.43	242.61	13.718	474.88
14.369	420.06	371.99	329.51	14.368	376.96	313.21	14.368	313.23	14.368	434.28	336.79	14.368	315.2	14.369	326.23	14.369	322.32	14.368	384.04	14.369	218.12	14.368	343.86	328.81	14.369	293.85	14.367	335.53	357.04	14.368	373.49	14.369	412.35	14.368	436.39	14.365	320.95	318.03	14.369	355.27	351.71	14.368	309.49	355.43	14.37	330.41	243.28	14.368	475.78
15.018	421.33	360.51	357.55	15.018	376.54	312.4	15.02	313.57	15.018	434.94	336.5	15.018	315.11	15.019	326.43	15.019	322.61	15.02	384.38	15.019	217.8	15.018	344.57	329.79	15.019	293.91	15.02	335.21	356.62	15.019	373.29	15.019	412.17	15.019	435.87	15.017	321	319.2	15.019	356.09	352.45	15.018	310.13	353.9	15.018	330.23	243.01	15.019	475.42
15.668	417.95	354.74	393.24	15.668	378.76	312.39	15.668	313.41	15.668	434.96	337.86	15.668	315.32	15.669	326.34	15.669	322.63	15.665	383.79	15.67	218.53	15.669	343.72	329.53	15.67	293.83	15.667	335.2	356.81	15.668	373.21	15.669	412.32	15.67	435.7	15.669	323.09	318.83	15.67	359.33	351.85	15.668	310.31	355.18	15.67	330.06	244.36	15.669	475.55
16.318	406.28	352.4	395.48	16.319	377.5	312.68	16.32	313.1	16.32	436.3	338.08	16.317	315.09	16.319	326.6	16.319	322.27	16.316	383.64	16.32	222	16.319	343.19	329.22	16.32	294.31	16.32	335.86	357.07	16.318	373.25	16.318	412.28	16.318	435.46	16.317	323.33	319.66	16.319	360.77	352.04	16.319	310.03	354.35	16.318	329.72	244.31	16.32	474.77
16.968	402.54	350.31	394.35	16.969	376.7	312.92	16.968	313.13	16.968	435.05	338.55	16.968	315.03	16.969	325.82	16.969	322.4	16.964	384.05	16.97	222.46	16.969	343.52	328.52	16.97	294.8	16.967	335.78	357.45	16.968	373.2	16.97	412.54	16.969	436.53	16.97	322.89	319.03	16.969	362.41	350.4	16.969	309.92	354.94	16.97	330.45	244.29	16.97	474.68
17.618	400.34	351.37	371.26	17.618	377.47	312.32	17.619	313.05	17.621	435.83	339.4	17.617	315.39	17.618	326.02	17.62	322.7	17.616	383.66	17.62	221.74	17.617	343.46	329.29	17.62	294.24	17.619	335.7	357.72	17.618	373.39	17.619	412.36	17.619	435.6	17.62	323.09	320.29	17.619	363.34	332.84	17.614	310.12	354.44	17.618	329.7	244.49	17.619	473.78
18.268	398.14	349.33	356.91	18.268	377.84	312.14	18.269	313.93	18.268	435.1	339.65	18.268	315.5	18.27	326.21	18.268	329.08	18.266	384.09	18.27	220.46	18.269	343.44	330.01	18.27	294.28	18.269	335.76	357.43	18.268	373.31	18.269	412.14	18.269	435.49	18.265	322.35	320.05	18.27	364.99	329.36	18.269	310.81	355.57	18.268	331.42	244.93	18.269	474.26
18.919	398.59	348.07	346.66	18.918	377.25	310.86	18.919	313.18	18.918	434.03	339.76	18.918	315.45	18.918	326.43	18.919	329.69	18.919	384.27	18.918	221.82	18.918	343.71	330.07	18.92	294.32	18.919	335.66	357.21	18.918	373.03	18.919	412.62	18.919	435.83	18.919	322.05	321.36	18.919	365.37	338.64	18.919	310.93	355.01	18.919	331.38	245.32	18.918	474.67
19.569	394.67	381.71	343.31	19.568	377.42	310.84	19.569	312.83	19.57	434.04	340.43	19.568	315.38	19.57	326.59	19.569	329.68	19.565	384.27	19.569	224.29	19.568	342.98	330.38	19.57	293.9	19.568	335.59	357.42	19.568	373.2	19.569	412.64	19.569	435.74	19.566	321.9	322.69	19.569	365.92	349.15	19.569	311.1	354.79	19.569	330.92	247.1	19.57	472.62
20.22	394.03	416.56	338.68	20.218	377.83	310.49	20.219	312.38	20.219	435.94	340.39	20.218	316.99	20.219	325.74	20.219	330.25	20.218	384.38	20.218	223.43	20.218	343.13	330.7	20.22	294.17	20.22	335.56	357.17	20.217	372.95	20.219	412.96	20.219	434.1	20.22	320.96	321.23	20.219	366.05	349.2	20.219	310.86	355.51	20.219	330.99	246.41	20.22	473.51
20.868	392.61	418.57	335.94	20.868	378.17	311.32	20.869	312.88	20.869	436.65	339.76	20.869	316.53	20.869	325.72	20.869	330.17	20.864	384.01	20.87	223.77	20.869	343.27	330.31	20.87	293.91	20.868	335.97	357.57	20.868	373.43	20.869	412.64	20.869	430.97	20.866	318.85	320.56	20.869	366.6	348.35	20.869	311.49	354.02	20.869	331	246.23	20.869	473.8
21.52	393.09	421.31	336.01	21.518	377.89	310.46	21.519	313.22	21.52	436.47	340.3	21.517	316.26	21.518	325.19	21.519	330.05	21.515	383.89	21.518	222.75	21.517	342.99	330.02	21.52	294.24	21.52	335.97	357.65	21.518	372.74	21.519	412.23	21.518	416.36	21.52	318.7	319.87	21.52	366.57	350.7	21.518	312.07	354.81	21.519	331.18	246.34	21.519	474.16
22.168	391.55	415.55	335.44	22.168	377.78	284.82	22.169	313.19	22.17	435.69	340.3	22.168	316.64	22.17	325.67	22.169	330.32	22.165	383.83	22.17	220.28	22.169	342.96	330.46	22.169	294.25	22.168	335.25	357.05	22.168	372.97	22.169	411.77	22.17	409.66	22.169	320.05	318.99	22.17	367.23	349.32	22.168	312.52	354.74	22.167	331.23	247.02	22.17	473.28
22.819	390.39	396.79	334.16	22.819	378.46	268.23	22.819	312.56	22.818	436.24	341.32	22.818	316.17	22.819	325.65	22.819	329.88	22.815	383.92	22.818	220.9	22.817	342.33	330.89	22.819	294.45	22.82	335.57	357.44	22.818	373.01	22.818	412.01	22.818	410.83	22.821	320.9	318.74	22.82	363.3	347.92	22.819	312.32	355.17	22.818	330.25	245.64	22.82	471.98
23.469	389.78	381.64	334.33	23.469	377.84	265.59	23.468	312.6	23.47	435.51	341.47	23.468	316.37	23.469	326.64	23.469	329.72	23.469	383.79	23.469	221.68	23.469	342.84	330.25	23.469	294.84	23.468	335.2	356.7	23.468	373.13	23.468	411.72	23.468	425.74	23.468	320.32	320.15	23.47	360.6	348.24	23.468	312.57	355.42	23.468	329.21	246.77	23.47	473.29
24.12	387.65	369.93	336.56	24.119	378.39	271.17	24.118	312.4	24.119	433.62	340.68	24.118	317.14	24.119	325.79	24.118	329.74	24.119	383.84	24.118	225.07	24.117	342.88	330.8	24.121	294.96	24.119	335.54	357.2	24.118	373.14	24.118	411.5	24.118	432.12	24.12	321.2	321.48	24.12	360.28	349.13	24.118	312.48	355.89	24.118	329.42	247.91	24.118	472.23
24.768	385.67	365.54	334.3	24.769	378.71	283.42	24.768	312.22	24.769	434.26	341.07	24.768	317.59	24.769	325.47	24.769	329.53	24.765	383.97	24.769	223.53	24.768	343.01	330.61	24.769	294.64	24.769	335.35	357.19	24.767	372.79	24.768	411.9	24.768	433.45	24.769	319.25	320.03	24.77	359.69	349.31	24.768	311.94	355.42	24.768	330.51	247.51	24.77	472.66
25.421	395.76	363.65	333.71	25.419	377.78	288.01	25.418	312.54	25.418	434.74	341.67	25.418	316.87	25.418	325.66	25.419	329.64	25.415	383.95	25.418	220.75	25.418	342.81	330.38	25.419	294.59	25.419	335.16	357.04	25.419	372.57	25.418	412.88	25.418	434.52	25.415	319.75	311.89	25.42	361.48	349.23	25.419	315.15	355.21	25.418	330.93	247.85	25.42	473.08
26.069	416.87	361.7	332.55	26.069	377.62	293.39	26.068	311.89	26.07	435.74	340.83	26.069	316.65	26.068	326.06	26.069	329.32	26.069	383.79	26.07	218.82	26.07	342.84	329.92	26.069	294.71	26.069	335.33	357.21	26.068	372.1	26.068	423.39	26.068	434.27	26.065	320.65	311.75	26.069	362.47	349.71	26.067	330.94	355.36	26.064	331.2	246.62	26.071	472.99
26.719	427.48	362.49	330.01	26.718	377.6	298.36	26.718	311.85	26.718	436.1	341.74	26.717	316.62	26.719	325.87	26.72	328.75	26.715	383.37	26.718	218.86	26.718	343.28	330.18	26.719	294.28	26.72	335.56	357.47	26.718	372.33	26.719	425.13	26.718	435.03	26.719	320.53	309.75	26.719	364.26	350.07	26.718	320.33	354.84	26.718	330.36	247.33	26.718	471.65
27.369	419.73	360.62	329.17	27.369	376.67	300.35	27.368	312.37	27.368	436.15	341.97	27.368	317.28	27.369	325.57	27.368	328.48	27.369	383.58	27.368	221.71	27.368	342.82	330.22	27.368	294.05	27.368	334.96	357.51	27.368	372.3	27.368	421.23	27.368	434.63	27.369	322.71	311.95	27.369	365.13	349.62	27.368	322.37	354.75	27.368	329.56	247.39	27.369	472.54
28.02	407.25	361.71	351.19	28.019	377.12	302.76	28.018	312.75	28.018	436.06	341	28.017	316.74	28.019	325.19	28.019	332.67	28.015	383.75	28.018	220.64	28.018	342.85	330.33	28.02	294.34	28.019	334.72	357.95	28.018	372.72	28.018	416.16	28.02	434.44	28.019	322.39	314.05	28.019	366.82	350.74	28.019	319.57	354.89	28.018	328.47	246.94	28.019	471.31
28.668	401.2	359.77	392.28	28.669	378.11	303.84	28.669	312.98	28.668	436.1	340.17	28.669	316.8	28.669	324.87	28.669	342.34	28.663	383.51	28.668	220.6	28.668	343.3	330.17	28.668	294.93	28.669	335.14	358.14	28.668	372.4	28.668	414.19	28.668	434.64	28.669	322.55	313.17	28.669	367.25	351.05	28.667	308.8	354.78	28.668	330.04	247.83	28.671	471.63
29.319	396.92	358.5	400.45	29.317	378.31	304.28	29.319	312.58	29.319	436.1	340.92	29.317	316.85	29.319	325.59	29.318	344.53	29.315	383.39	29.319	221.65	29.319	343.32	330.3	29.32	295.19	29.318	334.8	358.41	29.319	372.68	29.318	412.5	29.318	434.44	29.318	322.3	314.08	29.319	367.36	350.73	29.319	302.82	354.93	29.317	330.4	247.13	29.319	471.68
29.97	398.74	357.72	394.09	29.969	377.69	305.38	29.969	313.05	29.969	435.92	341.84	29.968	316.95	29.969	326.17	29.968	339.71	29.969	383.45	29.968	220.04	29.968	342.82	330.91	29.968	295.24	29.968	334.92	358.47	29.968	372.09	29.968	412.02	29.968	434.19	29.97	322.08	314.7	29.97	367.48	350.8	29.967	303	354.93	29.969	329.66	246.35	29.969	470.35
30.619	396.81	356.73	375.26	30.618	376.85	306.8	30.619	312.76	30.62	435.59	341.92	30.618	317.22	30.619	326.21	30.618	333.68	30.62	383.16	30.619	220.12	30.62	342.64	329.78	30.62	294.76	30.618	334.62	358.49	30.618	372.31	30.618	411.92	30.62	434.37	30.62	320.65	315.46	30.618	364.47	350.25	30.619	301.89	354.57	30.617	329.28	245.28	30.619	471.28
31.269	391.89	357.14	358.54	31.27	377.63	307.42	31.267	313.31	31.269	436.8	342.29	31.268	316.69	31.269	326.12	31.268	330.84	31.265	382.97	31.269	218.7	31.267	342.61	330.03	31.269	295.05	31.27	334.13	358.26	31.268	372.48	31.268	411.01	31.269	434.79	31.27	320.15	315.67	31.269	349.27	349.99	31.267	303.37	354.74	31.269	327.88	245.41	31.27	470.61
31.919	391.98	356.7	345.81	31.919	377.32	307.93	31.919	313	31.919	437.88	342.79	31.92	316.91	31.918	326.04	31.919	329.53	31.915	383.99	31.919	220.41	31.918	342.79	330.12	31.919	295.03	31.918	335.89	358.35	31.918	372.19	31.917	411.75	31.919	435.82	31.92	320.7	316.51	31.919	334.76	351.28	31.919	303.47	354.38	31.917	327.53	246.39	31.92	470.82
32.569	390.81	355.29	342.26	32.569	378.31	308.09	32.568	313.13	32.569	436.4	343.39	32.57	316	32.569	325.73	32.569	329.28	32.565	383.59	32.569	218.82	32.568	343.56	329.84	32.568	295.27	32.57	337.41	358.47	32.568	372.45	32.569	411.78	32.569	435.1	32.57	318.27	317.1	32.569	333.72	350.59	32.568	303.22	353.69	32.569	325.62	246.2	32.57	470.8
33.219	391.62	353.17	339.77	33.219	377.7	308.03	33.218	312.69	33.219	437.2	343.33	33.218	317.07	33.218	325.73	33.219	329.13	33.219	382.8	33.219	217.63	33.22	343.76	330.05	33.22	295.13	33.219	337	358.58	33.218	372.63	33.217	411.38	33.219	435.39	33.219	321.7	316.83	33.219	340.98	350.51	33.22	303.06	354.11	33.217	326	245.91	33.22	470.21
33.869	390.84	353.51	339.16	33.869	377.7	307.71	33.87	312.18	33.869	438.13	343.89	33.869	316.5	33.868	326.53	33.864	329.3	33.869	383.26	33.869	220.43	33.868	343.36	330.11	33.869	295.04	33.87	335.97	359.06	33.869	372.62	33.869	411.87	33.869	435.01	33.87	321.18	317.65	33.87	345.96	350.08	33.868	302.44	354.23	33.869	326.74	247.34	33.87	471.46
34.52	390.18	356.92	337.67	34.519	376.38	307.32	34.518	311.31	34.519	437.68	344.89	34.519	316.35	34.518	326.47	34.519	329.23	34.52	383.02	34.519	220.66	34.519	342.9	330.18	34.521	295.05	34.519	334.65	358.49	34.517	373.09	34.518	411.49	34.519	435.57	34.518	321.94	318.36	34.518	350.29	350.72	34.52	303.88	354.37	34.518	328.21	246.59	34.52	470.09
35.168	390.02	353.3	337.59	35.169	376.53	308.21	35.168	311.52	35.169	437.34	344.3	35.169	316.24	35.168	327.05	35.169	329.32	35.164	383.15	35.169	219.99	35.17	342.42	330.8	35.168	294.88	35.169	334.82	358.6	35.168	372.84	35.168	411.61	35.169	434.8	35.17	320.77	317.91	35.17	353.98	351.28	35.168	303.8	354.7	35.168	328.54	246.22	35.17	469.51
35.819	389.26	354.64	336.88	35.818	376.79	308.26	35.819	312.02	35.82	438.79	344.08	35.819	315.51	35.818	326.47	35.819	330.01	35.819	383.65	35.82	220.06	35.819	342.43	330.4	35.818	294.92	35.818	335.12	358.75	35.818	372.75	35.818	411.15	35.819	434.17	35.82	322.35	319	35.818	356.42	351.42	35.818	304.39	354.97	35.818	327.68	246.24	35.82	470.29
36.469	389.12	355.63	334.88	36.468	376.23	308.38	36.47	312.86	36.469	437.65	344.73	36.469	315.59	36.468	325.43	36.469	330.7	36.468	383.29	36.468	219.51	36.469	342.05	320.61	36.468	295.14	36.468	333.94	359.1	36.468	372.96	36.468	411.23	36.469	433.63	36.47	323.23	318.19	36.47	359.25	350.67	36.469	304.89	355	36.468	328.54	246.33	36.469	470.09
37.119	388.86	351.72	332.72	37.119	377.21	309.07	37.12	312.8	37.119	438.13	342.8	37.119	316.38	37.118	326.39	37.118	330.57	37.114	383.37	37.12	220.77	37.119	339.51	308.74	37.118	294.69	37.119	333.73	358.54	37.118	373.12	37.117	411.11	37.118	427.56	37.12	322.98	318.15	37.118	359.55	351.01	37.118	304.65	354.56	37.118	328.09	246.94	37.119	470.63
37.77	388.06	351.13	331.26	37.768	376.53	310.79	37.769	311.83	37.769	437.53	342.18	37.769	317.9	37.769	326.6	37.768	330.83	37.764	383.3	37.768	222.6	37.769	351.99	306.83	37.768	295.2	37.768	334.31	358.55	37.768	373.05	37.769	411.91	37.77	414.22	37.77	322.56	317.97	37.77	362.03	350.11	37.77	305.56	354.93	37.768	328.96	247.39	37.769	470.67
38.419	386.53	356.18	329.26	38.418	376.76	291.17	38.42	311	38.419	436.67	342.73	38.419	317.93	38.419	326.53	38.418	331.3	38.418	383.09	38.418	221.6	38.419	360.07	298.83	38.418	295.38	38.419	336.2	358.42	38.419	372.99	38.419	411.35	38.419	413.9	38.42	322.28	319.57	38.418	362.13	342.19	38.419	306.47	354.9	38.417	328.17	246.26	38.419	470.97
39.069	386.07	410.24	329.14	39.068	375.89	272.04	39.07	311.07	39.069	436.27	344.17	39.069	316.57	39.069	327.04	39.067	330.8	39.064	383.09	39.068	219.9	39.069	353.32	292.26	39.068	295.46	39.069	337.21	358.47	39.069	373.22	39.069	411.18	39.07	425.21	39.069	321.66	318.98	39.07	363.12	333.18	39.068	306.52	354.71	39.067	327.85	246.48	39.069	470.35
39.721	385.58	402.23	327.21	39.718	376.35	268.08	39.72	311.75	39.719	435.95	344.5	39.715	287.82	39.719	326.25	39.719	331	39.718	382.92	39.718	219.85	39.718	338.3	297.52	39.718	295.47	39.719	335.55	358.15	39.717	372.97	39.719	410.93	39.719	430.8	39.72	322.55	319.56	39.72	365.03	343.8	39.719	306.36	354.81	39.718	328.61	245.89	39.719	475.7
40.369	386.12	400.96	326.57	40.368	378.89	275.02	40.37	312.67	40.369	436.89	344.05	40.369	277.7	40.369	326.06	40.367	331.44	40.364	382.78	40.368	219.87	40.369	336.13	304.38	40.369	295.36	40.369	335.21	358.25	40.368	372.48	40.369	411.62	40.369	431.61	40.37	321.12	319.6	40.37	364.63	350.05	40.368	307.22	354.86	40.368	329.59	246.41	40.37	486.19
41.02	385.67	411.59	326.41	41.018	379.26	286.65	41.02	312.61	41.018	436.17	344.26	41.014	272.96	41.017	326.33	41.019	331.27	41.014	382.99	41.018	219.13	41.018	337.79	308.44	41.019	296.12	41.019	335.46	358.47	41.018	372.73	41.019	411.55	41.019	432.6	41.02	321.48	319.12	41.019	365.58	348.5	41.019	306.72	355.04	41.018	328.77	246.21	41.018	490.21
41.669	385.82	400.22	326.48	41.669	379.34	291.66	41.67	312.48	41.669	435.36	343.35	41.67	282.14	41.668	326.73	41.667	331.27	41.669	383.36	41.668	219.8	41.67	338.19	310.55	41.668	295.59	41.669	334.84	358.43	41.67	372.69	41.668	412.02	41.67	432.43	41.67	320.52	319.64	41.669	366.91	348.83	41.669	307.43	354.14	41.668	327.87	247.48	41.669	488.84
42.32	386.96	388.07	326.79	42.318	378.43	295.13	42.32	312.24	42.319	435.68	333.55	42.317	294.14	42.318	327.13	42.319	331.31	42.315	383.28	42.318	220.19	42.318	338.42	311.51	42.32	295.48	42.319	334.88	358.94	42.318	372.62	42.319	411.53	42.32	432.61	42.32	321.46	318.81	42.319	360.18	347.25	42.319	308.68	355.06	42.318	328.04	248.05	42.321	485.15
42.97	386.17	376.55	326.59	42.969	377.97	300.18	42.97	312.42	42.969	432.25	320.48	42.969	297.78	42.969	326.53	42.967	331.38	42.969	383.49	42.968	217.28	42.97	338.21	313.09	42.97	295.29	42.968	335.17	358.66	42.968	372.76	42.968	411.55	42.97	432.54	42.97	320.9	318.58	42.969	348.25	348.5	42.971	308.03	354.5	42.968	327.77	247.61	42.969	480.52
43.621	386.44	371.02	327.32	43.619	378.11	302.22	43.619	312.56	43.618	412.96	311.87	43.619	299.71	43.621	326.41	43.619	331.24	43.615	383.11	43.618	216.99	43.618	338.08	314.4	43.618	295.16	43.62	335.33	358.79	43.618	372.44	43.618	411.61	43.62	432.07	43.619	320.92	318.09	43.619	343.22	348.31	43.619	308.03	353.99	43.619	326.81	246.11	43.619	477.09
44.27	394.1	367.85	325.67	44.269	378.11	304.08	44.269	312.76	44.27	397.07	309.12	44.269	302.99	44.269	326.51	44.268	331.21	44.265	383.63	44.268	217.85	44.27	338.72	315.08	44.27	295.1	44.269	335.02	358.85	44.268	372.57	44.268	411.56	44.268	431.59	44.269	323	318.39	44.269	347.1	348.46	44.269	309.32	354.85	44.267	328.04	245.92	44.269	477
44.92	411.12	367.82	326.45	44.918	378.87	304.08	44.919	312.41	44.918	400.39	314.97	44.919	302.86	44.919	326.81	44.918	331.23	44.919	384.41	44.919	217.95	44.918	338.57	316.56	44.918	294.87	44.919	334.69	358.9	44.919	372.57	44.919	411.05	44.92	431.01	44.919	321.32	317.02	44.919	351.04	348.86	44.919	309.02	354.03	44.919	328.42	245.11	44.919	474.33
45.569	422.43	366.57	324.87	45.568	378.67	305.08	45.569	313.08	45.57	413.89	318.6	45.569	305.22	45.569	326.97	45.568	331.13	45.565	384.55	45.57	216.17	45.57	338.68	317.72	45.569	294.83	45.569	334.45	358.58	45.567	372.18	45.567	411.41	45.569	431.26	45.569	321.24	310.25	45.569	353.64	349.31	45.569	309.01	354.94	45.567	328.22	245.08	45.57	474.08
46.219	426.34	363.68	326.27	46.218	376.8	304.9	46.219	312.58	46.219	408.49	321.79	46.22	307.04	46.219	326.65	46.218	331.16	46.215	384.46	46.218	217.26	46.221	339.11	317.97	46.219	294.21	46.219	335.51	357.94	46.219	372.04	46.218	411.82	46.219	431.56	46.219	321.62	308.94	46.219	356.57	349.36	46.219	309.39	354.46	46.219	328.42	245.16	46.22	473.93
46.869	410.43	362.09	325.08	46.869	347.63	305.33	46.869	312.13	46.869	414.59	324.55	46.868	309.05	46.868	326.78	46.868	331.48	46.869	384.54	46.87	214.13	46.869	338.93	318.86	46.869	294.62	46.87	352.85	358.27	46.869	372.59	46.867	411.4	46.869	430.24	46.869	321.51	307.77	46.869	359.08	349.66	46.869	309.93	354.11	46.867	329.29	245.65	46.869	472.9
47.519	401.16	360.48	325.03	47.518	334.08	306.97	47.519	312.58	47.519	417.7	326.24	47.52	309.85	47.52	326.28	47.52	330.99	47.513	384.55	47.518	213.89	47.519	339.29	318.39	47.519	294.73	47.518	360.88	358.62	47.519	372.19	47.519	411.4	47.52	430.74	47.518	321.02	308.63	47.519	361.33	349.94	47.519	310.25	354.55	47.52	328.61	246.07	47.519	472.96
48.169	396.84	358.41	322.69	48.168	336.85	305.46	48.169	313.05	48.169	422.67	327.2	48.168	311.54	48.167	325.6	48.167	330.83	48.169	384.62	48.17	214.75	48.169	339.18	318.68	48.167	294.76	48.169	350.71	358.69	48.167	372.4	48.169	410.97	48.169	430.94	48.17	320.97	311.64	48.169	362.73	350.29	48.17	310.38	354.28	48.168	328.47	246.26	48.169	473.62
48.819	395.02	358.37	322.81	48.818	346.54	292.09	48.819	312.46	48.819	424.74	329.95	48.82	310.98	48.819	325.96	48.817	331.25	48.813	384	48.818	214.9	48.819	339.6	319.07	48.819	294.76	48.819	338.28	358.68	48.818	372.58	48.819	411.24	48.819	430.74	48.818	321.68	314.76	48.82	364.47	350.47	48.82	310.67	354.71	48.819	329.32	244.07	48.819	473.24
49.469	394.4	358.21	323.3	49.469	357.39	277.17	49.47	312.35	49.469	429.81	331.14	49.468	311.04	49.469	325.82	49.467	331.34	49.469	384.3	49.467	214.83	49.468	340.12	320.34	49.469	294.73	49.468	332.71	358.51	49.468	372.66	49.47	411.32	49.469	430.51	49.469	321.17	316.52	49.468	365.73	349.94	49.47	310.48	354.86	49.469	329.21	244.65	49.469	473.26
50.119	393.53	357.24	322.31	50.119	366.72	277	50.12	312.38	50.119	433.28	331.67	50.12	311.71	50.119	326.32	50.117	330.84	50.113	383.95	50.118	215.54	50.118	340.03	320.47	50.12	295.2	50.118	329.6	358.55	50.118	372.65	50.119	411.32	50.119	429.52	50.118	321.48	318.12	50.12	366.17	349.71	50.12	310.67	353.81	50.117	327.46	245.12	50.119	471.78
50.77	388.48	357.57	322.3	50.77	371.37	284.41	50.77	312.27	50.767	435.77	332.63	50.768	311.25	50.769	326.25	50.769	330.92	50.768	384.06	50.768	214.95	50.769	340.29	320.47	50.767	295.3	50.77	329.99	358.42	50.768	372.71	50.769	411.36	50.769	430.37	50.77	321.58	318.73	50.768	366.54	349.82	50.769	311.29	354.17	50.769	328.31	245.07	50.768	471.51
51.42	387.14	354.89	321.75	51.419	373.65	290.05	51.42	311.98	51.419	437.38	332.91	51.42	311.29	51.419	325.62	51.419	330.57	51.418	383.89	51.418	215.27	51.419	340.34	318.15	51.419	295.07	51.418	329.68	358.46	51.418	372.86	51.42	411.48	51.42	429.8	51.42	321.02	318.8	51.419	358.01	351.02	51.419	310.93	353.96	51.419	328.32	246.55	51.42	472.31
52.07	386.55	354.46	324.5	52.068	374.7	295.38	52.069	312.43	52.069	437.49	333.45	52.068	311.86	52.069	326.04	52.067	330.97	52.064	383.37	52.069	215.44	52.069	340.83	312.53	52.069	302.62	52.068	330.06	358.45	52.07	372.79	52.068	411.37	52.069	420.51	52.07	319.85	318.56	52.069	346.87	350.03	52.069	310.09	355.7	52.067	327.98	246.06	52.069	470.32
52.72	385.63	354.82	326.09	52.72	375.11	297.99	52.719	312.78	52.719	437.78	334.41	52.719	311.87	52.72	326.08	52.719	330.23	52.714	383.97	52.721	215.38	52.719	341.19	305.79	52.719	324.44	52.718	330.96	358.55	52.718	372.49	52.719	411.88	52.721	410.48	52.72	319.84	318.93	52.719	344.85	350.29	52.719	308.93	377.17	52.719	327.94	247.17	52.719	471.55
53.37	384.09	359.89	324.84	53.369	375.67	299.89	53.368	312.02	53.369	439.06	334.89	53.369	312.62	53.367	326.91	53.368	331.33	53.369	383.39	53.368	215.95	53.369	341.01	300.53	53.369	327.88	53.37	331.81	358.44	53.368	372.31	53.369	411.11	53.369	412.91	53.37	320.62	319.31	53.369	348.4	350.85	53.369	326.57	379.78	53.367	329.1	247.98	53.369	472.53
54.02	382.57	362.95	324.34	54.02	376.06	302.81	54.019	312.79	54.019	438.43	336.36	54.019	312.35	54.019	327.16	54.018	330.58	54.018	383.72	54.021	215.84	54.019	341.67	305.98	54.019	318.73	54.018	331.61	357.99	54.018	372.54	54.019	411.36	54.021	428.01	54.02	320.86	318.34	54.02	351.71	337.71	54.019	322.34	363	54.018	328.46	246.4	54.019	471.65
54.671	380.6	366.73	324.35	54.67	376.46	302.88	54.668	312.57	54.669	439.59	337.45	54.669	313.33	54.667	327.28	54.668	330.76	54.668	384.17	54.668	214.44	54.669	340.9	311.56	54.669	306.42	54.669	332.02	358.36	54.67	372.42	54.669	411.37	54.669	429.83	54.67	319.56	317.57	54.668	354.95	338.09	54.669	319.73	347.26	54.669	328.39	244.2	54.668	470.52
55.319	380.46	383.86	323.31	55.32	377.54	304.15	55.32	312.07	55.319	440.31	328.39	55.319	313.29	55.317	326.97	55.318	331.29	55.314	383.36	55.32	213.66	55.319	341.27	315.17	55.319	297.18	55.319	331.1	358.71	55.318	372.41	55.319	410.79	55.319	429.65	55.32	320.13	317.94	55.319	357.83	349.43	55.319	320.98	347.63	55.317	327.25	245.16	55.319	471.32
55.969	380.61	399.5	323.38	55.968	353.42	304.55	55.968	312.8	55.969	440.93	318.61	55.969	313.55	55.968	326.48	55.968	331.17	55.966	383.75	55.969	216.05	55.968	341.53	318.08	55.969	294.93	55.969	331.42	358.37	55.969	372.54	55.969	411.01	55.968	430.32	55.968	319.42	318.92	55.969	359.93	350.86	55.97	310.57	350.08	55.969	327.3	246.67	55.968	471.23
56.619	379.64	394.66	325.52	56.62	341.52	305.66	56.62	312.27	56.619	441.23	314.93	56.618	313.26	56.618	326.11	56.618	331.27	56.615	384.16	56.621	216.82	56.62	338.94	319.16	56.618	294.2	56.619	331.55	357.87	56.619	372.22	56.619	411.54	56.62	430.86	56.62	319.44	319.68	56.619	362.62	348.77	56.618	305.84	352.33	56.619	326.66	246.51	56.62	472.98
57.271	379.3	383.07	383.47	57.269	348.86	306.38	57.268	311.82	57.269	441.03	319.19	57.268	314.35	57.267	326.89	57.268	331.44	57.268	383.47	57.269	214.92	57.268	347.09	320.14	57.268	293.69	57.269	332.22	358.36	57.269	371.96	57.269	411.33	57.269	431.21	57.268	320.31	319.56	57.269	363.85	349.73	57.269	303.41	352.53	57.27	328.86	246.16	57.269	474.49
57.919	378.28	367.28	401.41	57.919	361.46	306.3	57.92	312.15	57.919	441.39	324.36	57.919	314.14	57.918	327.16	57.918	331.17	57.921	383.75	57.92	216.54	57.918	352.34	320.67	57.918	293.76	57.919	331.86	358.52	57.919	372.21	57.919	411.5	57.918	431.91	57.92	318.94	320.08	57.919	365.25	349.69	57.918	302.31	352.62	57.918	330.23	245.82	57.919	481.3
58.569	378.38	362.33	409.03	58.569	369.04	307.1	58.569	311.55	58.569	441.7	327.78	58.569	299.76	58.568	327.56	58.567	331.13	58.565	383.83	58.57	215.58	58.569	342.7	321.47	58.568	293.95	58.569	332.05	358.27	58.569	371.98	58.569	411.72	58.568	431.29	58.568	318.96	318.01	58.569	365.68	349.61	58.569	303.76	352.88	58.567	329.1	245.59	58.569	483.75
59.219	377.77	360.44	405.12	59.219	370.58	308.47	59.219	312.24	59.219	443.05	329.96	59.219	277.02	59.218	327.1	59.219	331.13	59.221	383.87	59.22	216.44	59.219	335.24	322.4	59.219	293.57	59.219	332.42	358.42	59.218	372.5	59.219	412.3	59.218	431.49	59.22	319.24	311.2	59.219	365.81	349.53	59.219	303.78	353.2	59.218	329.06	246.22	59.219	487.73
59.869	377.65	361.25	395.83	59.869	372.38	308.21	59.868	312.85	59.869	443.34	332.48	59.869	273.56	59.868	326.92	59.868	331	59.865	382.89	59.869	217.14	59.868	334.42	322.08	59.868	293.71	59.868	332.11	357.9	59.868	372.37	59.869	412.11	59.87	432.29	59.868	318.83	309.41	59.869	365.36	350.27	59.869	302.4	353.87	59.867	328.87	246.41	59.869	483.46
60.519	376.45	360.14	373.66	60.519	373.93	308.92	60.52	312.48	60.519	443.91	332.29	60.519	279.63	60.518	326.91	60.518	331.35	60.519	383.43	60.52	216.29	60.519	336.02	322.15	60.519	293.75	60.518	332.01	358.59	60.518	372.63	60.519	412.21	60.52	432.23	60.52	320.2	310.52	60.518	366.14	350.13	60.519	301.72	355.04	60.52	328.81	245.79	60.519	479.72
61.169	376.13	359.07	356.77	61.169	374.08	308.69	61.17	312.26	61.168	443.16	333.77	61.169	294.33	61.17	327.21	61.168	331.13	61.165	388.44	61.17	216.25	61.169	336.11	322.1	61.168	294.01	61.168	332.24	358.25	61.168	372.64	61.169	412.11	61.169	431.34	61.168	319.39	312.93	61.168	366.57	350.19	61.17	302.77	354.62	61.168	327.39	245.87	61.168	476.89
61.821	376.98	360.1	348.96	61.819	374.23	307.38	61.818	312.62	61.819	444.5	335.24	61.818	300.07	61.817	327.83	61.818	331.18	61.815	388.03	61.818	215.87	61.819	336.66	322.77	61.82	293.5	61.818	332.11	358.08	61.818	372.93	61.819	411.97	61.819	431.54	61.82	318.18	315.48	61.82	368.01	350.74	61.818	303.11	355.16	61.819	326.86	245.8	61.82	475.22
62.469	378.26	362.75	343.96	62.468	374.56	305.87	62.468	312.5	62.469	444.96	335.52	62.468	301.66	62.47	328.38	62.467	330.89	62.465	388.35	62.47	215.02	62.469	336.6	323.56	62.471	293.78	62.468	332.71	358.2	62.468	372.47	62.47	411.77	62.47	431.68	62.468	319.33	316.32	62.468	367.47	350.19	62.47	304.71	355.44	62.469	327.99	245.24	62.47	473.07
63.121	387.52	362.41	342.6	63.12	374.02	306.92	63.119	312.84	63.119	444.17	336.58	63.119	303.55	63.118	328.06	63.119	330.79	63.115	388.13	63.12	214.88	63.119	338.12	323.57	63.118	293.86	63.118	332.1	357.93	63.118	372.77	63.119	412.08	63.119	432.09	63.12	317.24	317.71	63.12	367.56	348.91	63.119	304.36	355.2	63.119	328.25	247.57	63.118	472.91
63.768	413.09	357.73	339.17	63.768	374.29	307.81	63.769	313.71	63.769	442.91	337.73	63.769	304.12	63.771	327.32	63.768	331.5	63.77	388.48	63.77	215.1	63.768	337.74	323.51	63.771	293.2	63.768	332.63	358.36	63.768	372.59	63.769	411.77	63.769	430.49	63.768	318.88	318.2	63.768	369.19	346.99	63.77	304.6	355.21	63.769	328.94	247.92	63.768	471.72
64.42	419.41	355.66	339.32	64.42	374.85	292.1	64.418	312.87	64.419	442.54	338.12	64.419	305.61	64.419	327.12	64.418	331.23	64.42	388.32	64.419	215.5	64.418	337.87	324.02	64.419	293.49	64.418	332.3	357.81	64.418	372.78	64.419	412.03	64.419	430.1	64.419	317.75	318.87	64.419	368.56	346.42	64.418	305.37	354.8	64.418	328.6	248.24	64.42	471.98
65.069	429.21	354.84	338.98	65.068	374.47	269.56	65.068	313.15	65.069	440.57	338.69	65.069	306.79	65.069	326.75	65.067	331.59	65.066	388.57	65.069	213.74	65.068	337.98	324.18	65.071	293.55	65.069	332.46	358.34	65.068	372.67	65.069	412.08	65.069	430.13	65.069	318.26	319.66	65.069	368.26	352.71	65.07	305.55	354.42	65.069	329.48	246.3	65.07	471.84
65.72	429.61	353.36	336.55	65.718	373.72	263.49	65.72	312.29	65.719	441.94	339	65.719	308.44	65.719	326.79	65.719	331.36	65.714	388.79	65.72	214.7	65.719	338.65	323.62	65.72	293.52	65.719	333.66	358.03	65.719	372.32	65.719	411.83	65.719	428.81	65.719	319.04	320.72	65.72	367.88	351.18	65.718	305.66	354.27	65.719	330.41	246.21	65.719	471.52
66.37	423.41	362.28	335.93	66.369	373.61	272.24	66.368	312.55	66.368	441.98	338.5	66.367	310.01	66.369	327.14	66.367	331.17	66.365	388.58	66.37	216.17	66.369	338.37	324.29	66.37	293.28	66.369	348.43	358.29	66.367	372.62	66.369	411.65	66.369	429.03	66.369	320.09	320.68	66.368	368.88	350.85	66.369	305.46	354.16	66.369	284.35	246.25	66.369	471.07
67.02	412.57	394.08	335.9	67.019	373.49	282.36	67.02	312.45	67.018	442.34	339.37	67.018	311.05	67.019	327.48	67.019	331.1	67.019	388.11	67.02	215.04	67.019	338.9	323.16	67.019	293.15	67.019	350.76	358.42	67.019	372.54	67.019	411.92	67.019	429.27	67.019	319.83	320.45	67.02	368.82	348.99	67.018	305.86	354.72	67.02	282.83	244.97	67.018	471.34
67.67	404.98	407.17	336.65	67.669	373.66	290.21	67.668	312.89	67.668	441.03	339.85	67.668	311.26	67.67	326.93	67.668	331.69	67.665	388.17	67.67	214.5	67.669	339.32	322.3	67.67	293.34	67.669	339.59	358.32	67.667	372.31	67.668	411.65	67.669	430.8	67.669	318.7	321.16	67.668	368.65	349.66	67.669	306.31	354.04	67.667	283.93	245.78	67.67	470.38
68.32	398.46	411.11	335.69	68.319	373.41	295.28	68.319	312.55	68.318	440.76	340.49	68.319	311.06	68.319	326.93	68.318	331.33	68.319	388.43	68.32	215.61	68.319	339.69	323.17	68.32	293.63	68.318	334.43	357.93	68.319	372.37	68.32	411.51	68.319	428.83	68.318	318.12	320.86	68.319	367.65	349.36	68.319	306.33	354.51	68.319	292.5	246.95	68.318	471.3
68.969	395.36	402.41	334.8	68.969	374.15	298.25	68.969	311.9	68.97	441.26	340.15	68.967	311.42	68.969	326.73	68.968	331.1	68.965	387.67	68.97	216.75	68.967	339.84	323.26	68.97	293.85	68.969	332.82	358.19	68.969	372.62	68.968	412	68.969	425.07	68.968	317.85	320.5	68.969	353.34	349.7	68.969	307.73	354.67	68.969	301.94	247.48	68.97	470.94
69.619	394.31	386.07	332.82	69.619	374.23	300.74	69.618	311.84	69.618	439.99	340.45	69.618	311.5	69.619	326.96	69.617	331.27	69.615	388.66	69.622	215.54	69.619	339.57	322.61	69.62	293.58	69.617	331.68	358.6	69.62	372.39	69.62	412.19	69.619	412.76	69.618	318.59	320.05	69.619	338.65	349.46	69.619	307.67	354.42	69.619	306.48	247.15	69.62	470.8
70.268	391.78	380.93	332.37	70.269	374.14	301.32	70.27	312.14	70.269	440.2	340.28	70.268	312.54	70.269	327.84	70.27	330.99	70.268	388.89	70.267	216.55	70.268	340.37	322.85	70.27	293.77	70.269	332.02	358.44	70.269	372.44	70.268	412.57	70.269	408.17	70.272	318.77	320.36	70.269	335.22	350.08	70.269	307.84	353.89	70.269	309.38	245.92	70.268	470.63
70.919	390.15	373.28	332.47	70.919	375.71	303.52	70.92	312.63	70.918	440.27	341.05	70.918	311.94	70.919	327.67	70.918	330.5	70.92	387.97	70.919	215.18	70.919	340.18	322.24	70.919	293.7	70.917	331.55	358.74	70.92	372.4	70.92	412.66	70.92	414.98	70.919	319.27	321.81	70.92	342.58	350.27	70.919	307.83	353.49	70.919	312.77	244.88	70.92	470.5
71.569	387.59	366.24	332.68	71.569	375.23	304.4	71.57	312.23	71.569	440.28	341.31	71.567	312.49	71.569	327.14	71.569	330.41	71.564	388.23	71.569	217.13	71.567	338.81	322.01	71.569	293.41	71.569	331.67	358.66	71.568	372.37	71.568	412.88	71.568	425.09	71.569	318.93	321.42	71.568	347.31	350.17	71.568	307.68	354.23	71.569	315.2	244.76	71.568	469.98
72.219	388.43	364.08	332.64	72.219	375.8	306.46	72.22	311.36	72.219	440.02	341.2	72.218	313.33	72.219	326.67	72.218	330.05	72.214	388.34	72.219	216.51	72.219	343.99	322.84	72.22	293.67	72.217	333.14	358.79	72.218	372.39	72.22	412.3	72.219	425.61	72.22	319.08	320.86	72.218	352.37	350.45	72.22	308.02	363.24	72.219	316.06	245.09	72.219	471.01
72.869	387.21	362.32	331.8	72.868	374.31	306.03	72.868	310.95	72.869	439.97	340.79	72.868	314.4	72.87	326.61	72.87	330.33	72.866	388.54	72.869	216.26	72.867	345.45	324.07	72.87	294.14	72.869	332.97	358.53	72.868	371.99	72.869	411.76	72.869	425.96	72.869	318.16	320.73	72.868	355.18	350.09	72.869	307.96	375.89	72.869	317.96	245.66	72.869	470.92
73.519	385.4	360.49	348.89	73.518	374.32	301.31	73.52	311.95	73.519	441.48	341.64	73.519	314.65	73.52	326.33	73.518	329.45	73.516	388.54	73.519	216.97	73.519	337.48	325.03	73.52	293.67	73.518	332.83	358.46	73.518	372.13	73.519	411.88	73.519	425	73.52	317.99	322.06	73.518	357.89	350.99	73.52	308.33	363.42	73.519	316.91	244.96	73.519	470.52
74.169	382.25	360.13	398.34	74.17	375.04	279.27	74.168	311.87	74.169	441.06	341.66	74.167	315.17	74.168	326.8	74.17	329.62	74.165	388.66	74.169	219.22	74.169	334.83	313.55	74.17	293.6	74.169	332.49	358.51	74.164	372.18	74.169	411.98	74.169	424.93	74.17	318.83	321.07	74.168	360.83	350.95	74.168	307.59	349.46	74.168	317.38	248.61	74.169	470.04
74.819	378.66	358.73	410.05	74.82	375.54	275.46	74.82	312.7	74.82	424.51	341.35	74.819	314.29	74.818	327.65	74.819	329.54	74.815	388.88	74.819	221.11	74.819	335	309.24	74.82	293.9	74.817	332.8	358.05	74.819	372	74.819	411.88	74.819	425.16	74.82	319.84	320.93	74.819	364	351.66	74.82	308.12	347.42	74.818	316.95	249.6	74.819	470.68
75.47	376.97	359.46	413	75.469	375.77	282.16	75.47	312.81	75.468	409.18	342.35	75.467	315	75.47	327.94	75.469	329.84	75.464	388.94	75.47	221.58	75.468	336.59	307.61	75.47	293.91	75.469	332.53	358.5	75.469	372.42	75.469	411.66	75.469	426.3	75.47	319.57	321.44	75.469	365.69	351.24	75.468	308.33	351.24	75.468	317.47	247.26	75.469	470.57
76.12	376.87	360.78	412.33	76.119	375.95	286.93	76.12	312.92	76.118	402.76	337.18	76.119	315.04	76.118	327.34	76.119	329.99	76.114	389.04	76.12	221.11	76.119	336.74	299.99	76.119	293.88	76.117	332.94	358.73	76.119	372.63	76.119	412.15	76.118	427.55	76.12	320.4	322.02	76.118	366.08	348.39	76.12	306.75	352.36	76.118	317.15	245.51	76.119	470.01
76.768	376.26	362.44	394.72	76.768	376.08	292.95	76.77	312.93	76.769	412.8	320.6	76.768	315.49	76.769	326.54	76.77	330.15	76.765	388.62	76.768	219.58	76.767	337.87	297.15	76.769	294.33	76.769	333.24	358.86	76.769	372.52	76.769	412.26	76.77	428.4	76.77	320.12	321.83	76.769	366.63	340.38	76.77	308.13	352.42	76.77	318.86	244.5	76.769	471.33
77.42	374.35	359.96	370.85	77.419	375.79	298.59	77.419	312.73	77.419	418.36	313.9	77.418	316.07	77.419	326.83	77.418	330.73	77.419	389.1	77.42	217.72	77.419	337.34	301.08	77.418	294.28	77.418	332.77	358.78	77.418	372.6	77.418	412.07	77.419	427.39	77.42	320.14	322.7	77.419	366.25	332.77	77.418	309.24	351.87	77.418	319.68	245.05	77.421	473.15
78.069	375.06	361.74	357.34	78.069	375.64	301.68	78.069	312.52	78.07	418.8	313.48	78.068	316.56	78.069	326.74	78.069	329.98	78.069	388.23	78.07	216.3	78.069	337.63	307.2	78.07	294.15	78.069	333.4	358.62	78.068	372.32	78.068	412.49	78.07	427	78.069	319.14	321.77	78.069	362.06	341.8	78.068	307.99	351.73	78.069	320.99	245.56	78.068	481.31
78.719	374.08	359.93	350.37	78.719	376.25	303.46	78.72	312.4	78.72	422.38	319.06	78.718	316.42	78.719	327.57	78.719	330.02	78.715	389.22	78.72	214.08	78.719	337.78	310.38	78.718	294.48	78.719	333.18	358.64	78.719	372.31	78.718	412.42	78.718	426.98	78.715	319.59	315.2	78.719	350.56	349.04	78.719	307.91	352.49	78.719	321.96	245.23	78.721	486.43
79.368	374.22	358.6	348.31	79.369	375.87	305.18	79.37	311.65	79.369	426.07	322.67	79.368	315.35	79.369	327.77	79.369	330.15	79.366	389.37	79.37	214.35	79.368	337.84	312.45	79.37	294.66	79.368	333.09	358.66	79.369	372.33	79.368	412.37	79.37	426.87	79.37	319.82	313.35	79.369	347.56	350.07	79.369	309.4	353.38	79.368	322.41	245.34	79.368	483.96
80.02	374.8	359.53	344.63	80.019	378.04	305.07	80.02	311.48	80.017	429.29	325.44	80.018	315.46	80.019	328.22	80.018	330.27	80.02	389.35	80.019	213.19	80.019	338.15	312.1	80.019	295.14	80.018	333.27	358.35	80.018	372.26	80.018	412.57	80.018	427.69	80.02	318.85	313.85	80.019	349.21	349.85	80.019	308.86	354.06	80.019	322.91	245.15	80.021	479
80.669	374.89	360.45	343.53	80.668	378.49	306.72	80.67	312.08	80.669	431.6	328.45	80.668	316.06	80.669	327.87	80.668	330.21	80.665	388.93	80.67	212.79	80.667	338.08	313.77	80.669	294.74	80.669	334.02	358.44	80.668	372.4	80.668	412.55	80.67	426.75	80.67	320.1	314.99	80.668	350.89	348.58	80.669	309.62	353.99	80.667	322.29	246.24	80.669	475.59
81.319	371.91	362.23	342.9	81.32	376.77	305.27	81.318	311.86	81.319	434.49	329.24	81.318	316.6	81.319	327.69	81.318	330.67	81.319	389.49	81.318	212.76	81.318	338.39	315.18	81.318	294.14	81.319	333.51	358.6	81.318	372.38	81.318	412.48	81.319	426.03	81.32	321.24	315.67	81.319	352.7	348.99	81.319	309.13	354.93	81.319	323.7	246.39	81.32	473.94
81.969	397.75	364.03	341.62	81.967	377.72	306.27	81.968	311.39	81.97	434.96	331.61	81.968	315.89	81.969	327.83	81.968	330.64	81.969	388.87	81.97	214.08	81.968	338.86	315.68	81.969	294.56	81.968	333.76	358.62	81.968	372.37	81.969	412.96	81.969	425.49	81.97	320.72	317.1	81.969	356.11	349.33	81.969	309.35	354.62	81.968	324.24	245.92	81.97	473.72
82.619	409.9	367.21	340.14	82.619	376.34	306.82	82.62	312.01	82.618	435.92	332.04	82.618	315.67	82.618	327.86	82.618	330.86	82.619	389.38	82.618	213.99	82.618	338.96	316.39	82.618	294.52	82.618	333.5	358.2	82.618	372.31	82.619	412.6	82.618	425.33	82.62	320.13	315.85	82.619	359.12	349.13	82.619	310.76	354.43	82.618	324.95	245.71	82.619	472.14
83.268	413.51	368.21	339.25	83.268	375.11	307.99	83.268	312.32	83.269	436.1	332.88	83.267	315.58	83.27	327.99	83.268	331.17	83.265	389.42	83.269	214.08	83.268	335.39	317.1	83.27	294.85	83.268	333.73	358.43	83.268	372.34	83.268	412.67	83.269	425.94	83.269	320.21	317.11	83.269	360.5	349.3	83.269	311.48	354.39	83.267	326.22	245.84	83.269	472.07
83.92	420.24	361.58	340.2	83.92	374.99	309.5	83.919	312.54	83.919	437.72	333.88	83.919	315.65	83.92	328.36	83.919	330.47	83.915	389.05	83.919	219.53	83.918	341.51	317.78	83.918	294.25	83.92	333.59	358.23	83.917	372.17	83.918	412.65	83.919	426.5	83.919	320.06	317.72	83.919	362.57	349.26	83.918	309.87	353.98	83.919	326.19	245.89	83.919	470.13
84.569	426.81	360.61	339.92	84.568	375.53	310.78	84.568	311.91	84.57	438.56	334.35	84.569	316.43	84.57	328.22	84.569	330.62	84.565	389.62	84.569	219.72	84.569	339.71	318.65	84.57	294.34	84.568	333.03	358.89	84.567	372.58	84.568	413.03	84.569	426.07	84.57	320.33	317.6	84.569	364.13	350.2	84.57	310.19	355.16	84.568	326.74	246.4	84.569	470.21
85.219	423.64	361.87	338.09	85.22	375.65	310.88	85.218	311.93	85.218	438.95	335.23	85.219	317.02	85.218	327.49	85.219	330.87	85.215	388.25	85.219	220.2	85.219	334.88	319.19	85.219	294.22	85.218	333.07	359.14	85.217	372.89	85.218	412.49	85.219	425.79	85.217	320.77	319.31	85.219	365.52	349.73	85.218	310.19	354.71	85.218	327.57	246.56	85.219	470.42
85.87	408.62	367.91	338.29	85.869	375	310.2	85.868	312.65	85.868	439.83	336.55	85.869	316.89	85.87	326.65	85.869	331.03	85.865	388.16	85.87	218.87	85.868	334.59	318.56	85.87	294.46	85.87	332.78	358.9	85.868	380.97	85.867	412.09	85.869	426.71	85.869	318.89	319.65	85.869	365.34	350.03	85.87	309	353.75	85.868	327.93	248.53	85.869	470.52
86.52	400.6	369.8	337.3	86.52	374.65	309.13	86.52	312.5	86.519	439.6	338.56	86.519	316.59	86.52	326.83	86.519	330.03	86.518	388.38	86.52	219.19	86.518	335.51	319.71	86.519	294.58	86.518	333.63	358.48	86.518	384.21	86.519	412.34	86.519	423.9	86.521	319.68	320.46	86.519	362.41	349.45	86.519	309.53	354.3	86.518	328.96	249.11	86.52	469.47
87.17	398.36	369.79	337.11	87.169	374.6	309.31	87.17	311.97	87.17	439.79	338.88	87.168	316.26	87.168	327.42	87.169	330.06	87.166	388.44	87.17	219.22	87.168	337.07	319.62	87.169	294.54	87.168	333.42	358.13	87.168	382.75	87.168	411.94	87.169	425.4	87.169	319.7	319.96	87.169	362.18	349.88	87.169	310.06	354.36	87.168	328.43	248.9	87.169	469.06
87.818	390.65	359.84	334.99	87.818	374.91	309.49	87.819	311.94	87.818	440.46	340.12	87.818	315.81	87.819	327.8	87.819	329.32	87.82	389.07	87.82	217.44	87.819	338.07	320.42	87.818	295.01	87.819	332.98	356.09	87.818	379.2	87.818	412.79	87.818	416.93	87.819	319.22	319.56	87.819	361.83	350.75	87.818	310.97	354.83	87.818	329.49	245.87	87.82	469.63
88.47	389.48	357.58	337.44	88.469	374.94	309.81	88.469	311.62	88.469	440	340.88	88.469	316.68	88.469	327.8	88.469	329.47	88.468	388.17	88.47	216.14	88.469	338.14	320.94	88.47	294.88	88.469	332.83	344.88	88.468	376.95	88.467	412.98	88.468	407.94	88.469	319.71	319.97	88.469	361.92	349.94	88.468	311.02	354.16	88.469	329	245.56	88.47	472.63
89.118	386.63	357.24	337.89	89.119	375.44	310.72	89.12	311.8	89.119	440.47	340.89	89.119	316.69	89.119	327.7	89.118	329.79	89.114	388.41	89.12	215.33	89.119	338.81	320.26	89.12	295.46	89.119	333.23	341.84	89.118	376.12	89.119	413.17	89.118	405.96	89.12	321.08	319.47	89.119	362.91	349.66	89.118	311.31	354.43	89.119	328.23	244.31	89.12	470.32
89.769	383.72	357.47	340.6	89.769	375.47	310.35	89.768	311.95	89.769	441.42	341.56	89.769	316.67	89.769	327.56	89.768	329.59	89.77	387.96	89.769	213.98	89.767	340.11	320.57	89.768	295.32	89.77	333.13	335.96	89.767	376.25	89.769	413.14	89.768	419.2	89.77	319.99	320.28	89.769	364.65	350.58	89.768	311.26	354.57	89.768	289.5	244	89.77	472.43
90.419	384.1	354.16	338.02	90.419	375.3	309.3	90.42	312.09	90.42	442.47	341.73	90.419	316.9	90.42	326.65	90.418	329.22	90.413	387.75	90.419	215.34	90.42	338.99	320.38	90.42	295.03	90.418	332.97	335.88	90.419	376.4	90.419	412.92	90.418	424.75	90.42	319.33	319	90.419	365.02	350.24	90.418	311.12	354.69	90.418	282.32	245.46	90.42	470.79
91.07	381.89	352.32	336.29	91.07	375.29	280.31	91.07	312.33	91.068	441.25	341.37	91.069	317.2	91.068	327.07	91.068	329.36	91.067	387.76	91.068	215.52	91.068	339.47	321.29	91.07	295.01	91.07	332.98	339.2	91.068	376.1	91.069	412.65	91.068	425.75	91.07	319.6	320.51	91.069	364.87	350.93	91.068	311.15	355.3	91.068	286.02	245.89	91.068	471.32
91.718	382.29	350.93	337.27	91.718	375.33	261.84	91.718	311.89	91.719	439.98	342.37	91.719	318.5	91.719	327.68	91.718	329.01	91.715	387.62	91.72	215	91.72	339.73	321	91.72	295.1	91.718	332.93	343.94	91.72	375.66	91.719	413.05	91.719	425.68	91.72	319.89	320.11	91.72	364.08	352.11	91.719	311.21	354.68	91.718	295.68	244.97	91.719	471.76
92.37	382.72	351.98	332.59	92.369	374.05	263.52	92.37	311.61	92.369	440.5	342.77	92.369	318.11	92.369	328.25	92.368	328.79	92.369	387.52	92.368	214.93	92.368	339.86	320.8	92.369	294.95	92.37	332.84	346.15	92.368	375.18	92.368	412.63	92.369	425.1	92.37	319.68	321.59	92.37	352.94	351.32	92.369	311.19	354.73	92.368	309.04	244.76	92.368	471.73
93.02	381.89	359.11	334.78	93.018	373.71	271.33	93.02	311.89	93.019	438.64	342.41	93.018	318.44	93.02	328.49	93.019	328.63	93.015	387.43	93.02	215.76	93.019	339.73	322.03	93.019	295.36	93.018	332.8	347.5	93.02	374.69	93.02	412.46	93.019	424.32	93.02	319.71	322.02	93.018	337.55	351.52	93.019	311.51	354.95	93.018	309.35	246.34	93.02	472.35
93.668	378.39	374.07	335.55	93.67	374.68	283.4	93.669	313.06	93.669	439.01	342.39	93.67	317.98	93.668	328.22	93.669	328.54	93.665	388.32	93.669	214.58	93.668	340.33	322.13	93.669	294.97	93.67	332.65	349.2	93.668	374.3	93.668	412.4	93.669	424.89	93.669	319.27	321.03	93.67	328.37	351.4	93.668	311.31	354.4	93.669	311.17	248.32	93.668	469.65
94.318	378.79	395.45	335.1	94.318	373.83	290.57	94.319	312.26	94.319	438.16	342.65	94.319	318.28	94.32	327.65	94.318	328.56	94.319	387.87	94.319	214.5	94.32	340.92	322.32	94.319	294.97	94.319	332.75	349.99	94.318	374.66	94.32	412.5	94.319	425.16	94.319	320.75	320.55	94.32	335.11	352.1	94.318	311.85	354.34	94.318	313.38	247.55	94.32	470.8
94.97	412.34	400.97	334.75	94.97	375.07	293.73	94.969	313.43	94.969	437.27	343.65	94.969	317.62	94.968	327.46	94.968	328.7	94.965	387.42	94.968	215.13	94.968	340.62	323.63	94.969	295.39	94.969	333.32	350.68	94.968	374.18	94.969	412.84	94.969	424.34	94.969	320.33	320.86	94.97	338.55	352.22	94.968	310.86	354.42	94.969	313.95	246.57	94.968	470.29
95.618	413.87	398.4	333.13	95.618	374.57	297.23	95.621	312.67	95.62	440.2	344.08	95.62	318.78	95.618	327.5	95.618	328.77	95.615	386.62	95.619	214.77	95.619	341.07	323.89	95.619	295.15	95.619	332.91	351.46	95.618	374.13	95.619	412.77	95.619	424.32	95.619	320.28	320.82	95.618	345.64	352.3	95.618	310.78	354.33	95.619	314.55	246.41	95.62	469.91
96.27	417.3	382.06	334.57	96.27	374.46	300.64	96.268	311.74	96.268	441.25	343.82	96.27	319.29	96.268	327.76	96.268	328.2	96.265	387.4	96.268	213.48	96.268	340.63	323.36	96.269	295.32	96.269	334.36	352.25	96.269	374.21	96.268	412.64	96.269	423.87	96.269	321.11	320.73	96.269	349.36	352.81	96.268	310.9	354.36	96.269	317.28	246.52	96.268	469.5
96.918	406.25	375.15	333.84	96.918	374.48	302.51	96.921	312.73	96.919	440.79	343.79	96.918	319.11	96.918	327.57	96.918	328.52	96.916	387.73	96.92	214.08	96.92	341.28	313.06	96.919	295.62	96.919	333.84	352.51	96.917	374.04	96.919	412.8	96.919	424.29	96.919	319.51	320.57	96.918	353.65	353.35	96.92	311.65	354.19	96.917	318.85	247.61	96.919	469.7
97.57	398.88	367.37	334.53	97.57	374.77	304.1	97.568	313.04	97.569	441.09	344.22	97.571	319.42	97.568	327.6	97.57	328.5	97.564	387.3	97.568	211.83	97.568	341.62	307.55	97.569	295.56	97.569	333.88	353.36	97.569	374.14	97.568	412.81	97.568	425.16	97.571	321.09	321.58	97.57	357.92	352.73	97.569	311.45	354.25	97.57	319.56	247.44	97.569	470.3
98.219	394.32	367.08	385.06	98.219	375.7	304.51	98.221	312.64	98.219	440.39	344.44	98.219	318.1	98.219	327.72	98.219	328.62	98.216	387.1	98.22	213.35	98.22	341.58	300.38	98.219	295.28	98.22	333.82	353.6	98.217	373.62	98.218	412.88	98.217	424.89	98.219	319.72	321.29	98.218	360.46	350.24	98.219	310.68	354.24	98.218	321.09	247.11	98.219	469.67
98.868	392.65	364.13	411.25	98.869	375.04	306.58	98.869	312.59	98.869	439.21	343.78	98.87	316.96	98.869	327.34	98.87	328.93	98.868	387.14	98.869	214.84	98.868	341.14	294.9	98.869	295.24	98.868	333.74	354.13	98.869	373.9	98.868	412.44	98.869	424.59	98.868	319.76	321.05	98.869	362.39	332.35	98.869	311.31	354.58	98.87	320.52	247.02	98.869	470.2
99.52	394.02	360.86	418.58	99.519	374.46	306.89	99.521	312.43	99.519	438.03	343.61	99.518	317.43	99.519	327.63	99.519	329.27	99.515	386.57	99.519	214.57	99.52	341.51	298.9	99.519	295.12	99.52	333.63	354.03	99.517	373.64	99.518	412.51	99.518	424.28	99.519	320.07	313.46	99.519	363.34	334.59	99.518	311.75	354.98	99.518	321.07	245.26	99.52	469.98
100.169	388.04	359.73	419.75	100.169	374.98	306.37	100.169	312.46	100.169	439.7	345.17	100.17	316.71	100.169	328.29	100.169	329.25	100.165	387.45	100.168	213.69	100.168	342.26	307.74	100.169	295.32	100.169	333.05	354.68	100.169	373.77	100.168	412.38	100.169	425.19	100.169	319.44	309.35	100.17	364.68	348	100.17	310.88	354.11	100.169	321.45	246.55	100.17	469.54
100.819	385.29	358.4	411.16	100.819	375.51	306.38	100.821	312.24	100.819	439.22	344.38	100.818	318.4	100.819	328.45	100.819	328.86	100.814	387.44	100.819	214.49	100.819	342.72	312.17	100.819	295.5	100.819	333.42	354.7	100.818	373.6	100.818	412.35	100.818	424.95	100.819	320.44	308.8	100.818	365.39	351.79	100.818	311.14	354.62	100.819	321.07	246.03	100.821	469.95
101.469	382.82	362.1	385.63	101.469	374.28	307.88	101.469	312.49	101.469	437.17	344.99	101.468	318.52	101.469	328.68	101.469	328.54	101.469	387.38	101.468	214.9	101.469	342.33	316.02	101.469	295.26	101.469	333.11	355.24	101.469	373.54	101.468	412.26	101.469	425.51	101.469	320	309.76	101.47	364.98	350.25	101.47	310.8	354.87	101.469	321.31	246.72	101.468	469.43
102.119	384.05	367.46	365.52	102.118	374.18	309.27	102.12	311.93	102.118	436.06	343.13	102.118	317.48	102.119	328.56	102.118	329.15	102.115	387.81	102.118	215.58	102.119	342.3	317.8	102.119	295.36	102.119	333.56	355.25	102.118	373.55	102.119	412.21	102.119	424.45	102.119	320.77	312.69	102.12	365.94	348.54	102.118	310.28	354.91	102.119	321.22	247.03	102.119	469.58
102.769	383.16	366.66	356.9	102.768	374.76	310.19	102.77	312.6	102.77	436.39	343.22	102.769	318.19	102.769	328.78	102.768	328.8	102.765	388.11	102.768	215.75	102.769	342.23	318.37	102.77	295.91	102.769	333.12	355.76	102.769	373.64	102.769	413.45	102.769	425.39	102.768	322.54	316.15	102.768	366.7	348.11	102.769	310.59	354.52	102.768	321.24	246.55	102.769	473.24
103.419	385.19	363.51	354.23	103.419	373.79	311.59	103.419	313.12	103.418	435.59	342.79	103.418	319.24	103.419	327.8	103.419	329.09	103.415	387.71	103.418	215.64	103.419	342.27	318.78	103.418	295.86	103.42	332.44	356.14	103.419	373.5	103.419	424.28	103.418	424.94	103.42	362.72	316.11	103.42	366.3	347.99	103.418	311.24	354.26	103.418	322.27	247.24	103.419	479.49
104.069	382.56	360.89	350.74	104.069	375.28	311.63	104.069	312.81	104.068	435.85	339.56	104.07	319.41	104.069	327.42	104.068	329.38	104.065	387.51	104.068	217.24	104.069	341.96	318.54	104.07	295.48	104.069	332.19	356.83	104.069	373.38	104.069	426.01	104.07	426.03	104.069	364.44	316.91	104.069	367.32	348.64	104.07	310.94	354.41	104.069	322.95	246.58	104.069	486.49
104.72	381.48	355.84	348.98	104.719	375.91	312.09	104.72	313.09	104.718	435.92	321.78	104.718	317.8	104.719	328.04	104.719	329.5	104.713	387.07	104.718	216.73	104.719	341.75	319.4	104.718	295.77	104.72	332.61	356.45	104.719	373.27	104.719	422.32	104.72	425.4	104.72	362.94	317.69	104.719	369.08	348.03	104.718	311.26	354.74	104.718	323.82	245.29	104.719	489.32
105.37	380.62	354.31	346.54	105.369	375.31	311.79	105.37	311.93	105.37	434	316.02	105.37	318.58	105.367	328.21	105.369	329.29	105.369	388.05	105.369	217.18	105.368	341.91	320.44	105.37	295.68	105.368	332.96	356.81	105.369	373.31	105.369	417.03	105.37	426.76	105.37	340.11	318.05	105.37	369.71	347.31	105.37	312.09	354.52	105.368	323.05	245.72	105.369	491.51
106.02	380.9	356.22	344.32	106.019	375.84	311.01	106.02	311.03	106.017	433.71	311.02	106.018	317.87	106.019	328.25	106.019	329.76	106.019	388.34	106.018	217.96	106.018	340.66	320.68	106.018	295.59	106.02	333.4	356.39	106.019	373.32	106.019	414.12	106.02	427.11	106.02	328.53	319.69	106.02	369.88	347.69	106.02	318.68	354.6	106.018	323.5	245.93	106.019	489.24
106.668	400.08	357.53	343.33	106.669	374.96	310.86	106.67	310.98	106.669	434.63	319.23	106.669	317.77	106.669	328.86	106.669	329.32	106.665	388.14	106.67	218.15	106.668	341.86	321.6	106.67	295	106.668	332.9	356.48	106.669	373.23	106.667	411.98	106.67	427.04	106.67	321.27	320.64	106.669	354.25	347.85	106.67	329.35	354.12	106.668	324.75	245.55	106.67	486.62
107.32	407.35	355.48	340.29	107.318	375.97	310.02	107.32	311.15	107.32	432.94	323.51	107.317	319.41	107.318	328.55	107.319	329.42	107.315	388.52	107.318	218.48	107.318	341.06	322.72	107.318	294.48	107.32	333.27	356.81	107.319	373.02	107.319	412.18	107.318	426.94	107.32	318.58	320.54	107.319	340.24	348.2	107.319	323.54	354.19	107.318	323.5	246.43	107.318	485.49
107.97	413.63	355.61	340.76	107.969	375.9	310.73	107.97	312.41	107.968	433.64	326.91	107.968	318.26	107.969	328.41	107.969	329.84	107.965	388.11	107.97	217.83	107.968	336.75	322.93	107.97	294.93	107.968	333.12	357.01	107.969	372.97	107.968	411.55	107.969	427.26	107.97	318.67	321.72	107.969	339.89	347.96	107.968	322.51	354.72	107.968	323.65	247.68	107.969	482.67
108.618	406.28	360.52	339.5	108.618	374.58	312.31	108.62	311.8	108.62	433.86	329.34	108.618	317.61	108.618	328.19	108.619	329.75	108.619	388.33	108.618	217.71	108.618	352.79	323.74	108.618	294.68	108.619	333.22	357.01	108.619	373.22	108.618	411.55	108.618	426.85	108.62	319.78	320.74	108.619	344.56	347.7	108.619	319.75	355.22	108.618	322.07	247.53	108.619	480.82
109.27	395.78	358.62	337.97	109.268	374.74	311.7	109.27	311.58	109.27	433.72	331.26	109.27	317.02	109.27	327.84	109.269	329.55	109.269	388.81	109.27	217.13	109.268	361.98	323.55	109.268	294.43	109.268	334.72	357.16	109.268	373.3	109.268	411.6	109.27	427.56	109.269	320.83	321.25	109.269	350.09	349.23	109.269	307.77	359.28	109.269	322.51	247.15	109.271	477.61
109.918	394.96	356.82	337.89	109.919	375.2	310.07	109.92	310.89	109.92	436.14	332.64	109.918	317.7	109.918	328.21	109.918	329.87	109.914	388.65	109.919	218.11	109.919	350.73	324.33	109.918	294.56	109.918	334.2	357.83	109.919	373.46	109.919	412.22	109.92	427.68	109.919	321.04	320.94	109.919	352.44	348.94	109.921	301.95	380.25	109.918	324	247.09	109.919	477.16
110.57	394.39	354.52	336.36	110.568	374.93	311.33	110.57	311.1	110.57	435.34	334.05	110.568	317	110.568	327.98	110.568	329.62	110.564	388.47	110.569	217.02	110.567	337.34	323.2	110.569	294.64	110.568	333.6	357.78	110.569	373.11	110.568	411.86	110.57	427.7	110.57	320.62	320.99	110.569	354.1	349.09	110.569	302.56	377.93	110.568	323.62	247.28	110.571	477.44
111.219	391.13	354.63	336.27	111.219	374.15	310.75	111.22	311.19	111.218	435.35	334.9	111.22	316.88	111.218	327.83	111.218	330.02	111.219	388.96	111.218	218.05	111.218	336.52	324.16	111.219	294.38	111.218	332.54	357.69	111.219	373.12	111.219	412.12	111.22	427.74	111.218	320.74	320.4	111.219	356.41	349.13	111.219	303.14	355.32	111.218	323.61	247.77	111.219	475.85
111.869	389.83	354.2	336.42	111.868	374.41	309.42	111.87	311.53	111.868	436.35	335.62	111.869	316.39	111.868	328.3	111.868	329.98	111.869	388	111.868	218.84	111.868	337.44	324.08	111.869	293.88	111.868	332.5	357.66	111.869	372.6	111.868	411.81	111.87	426.97	111.87	320.26	320.97	111.87	358.44	348.63	111.869	302.61	347.68	111.868	324.99	247.49	111.87	474.75
112.519	389.32	354.61	334.81	112.518	373.96	309.89	112.52	310.6	112.518	436.9	336.45	112.519	317.29	112.518	327.33	112.518	330.06	112.515	387.87	112.519	216.88	112.518	337.48	322.96	112.519	294.65	112.518	333.02	357.87	112.519	372.88	112.518	411.58	112.52	427.23	112.518	322.17	323.24	112.514	360.02	348.8	112.52	302.24	348.56	112.518	325.36	248.17	112.52	475.21
113.169	389.58	354.3	334.21	113.17	375.77	309.28	113.17	311.1	113.168	436.71	336.94	113.168	317.98	113.169	327.03	113.168	330.07	113.165	388.01	113.168	216.89	113.168	338.4	323.73	113.168	295.27	113.168	332.68	357.3	113.169	372.57	113.169	411.46	113.169	427.73	113.17	322.51	322.67	113.17	361.46	348.99	113.168	302.2	352.68	113.168	325.58	247.58	113.17	474.35
113.818	385.84	355.73	333.8	113.817	376.1	310.44	113.82	311.32	113.818	436.88	337.63	113.82	317.93	113.818	327.69	113.817	330.32	113.819	387.89	113.818	217.85	113.818	338.69	323.2	113.818	294.19	113.819	332.99	357.67	113.819	372.65	113.819	411.44	113.821	420.44	113.819	322.73	321.96	113.816	363.15	349.13	113.819	303.02	352.66	113.817	324.95	246.17	113.82	473.09
114.47	385.13	361.35	332.65	114.47	375.58	311.12	114.469	311.24	114.468	437.35	338.88	114.468	317.14	114.468	327.54	114.468	330.46	114.463	388	114.469	217.72	114.47	338.9	323.27	114.468	294.39	114.469	332.7	357.78	114.47	372.78	114.469	411.5	114.469	413.66	114.471	321.68	321.76	114.47	363.77	349.02	114.469	303.11	352.28	114.469	325.98	246.87	114.47	474.65
115.119	384.41	367.16	332.79	115.119	374.27	311.2	115.12	312.04	115.119	438.01	340.29	115.12	316.78	115.119	327.52	115.118	329.87	115.116	387.76	115.119	217.48	115.119	338.16	323.48	115.118	294.23	115.118	332.89	357.6	115.118	372.3	115.119	411.81	115.121	410.37	115.118	322.77	321.91	115.118	364.05	348.99	115.121	302.92	352.44	115.118	325.59	247.65	115.12	475.4
115.77	385.25	366.08	331.95	115.769	375.58	309.71	115.77	312.08	115.769	438.28	339.65	115.768	316.76	115.769	327.66	115.768	329.77	115.77	387.72	115.77	218.46	115.769	338.13	323.33	115.769	294.16	115.768	333.55	357.65	115.769	372.4	115.769	411.52	115.769	421.97	115.77	322.13	321.65	115.769	363.67	348.92	115.769	303.16	353.23	115.768	324.97	248.95	115.769	475.09
116.419	384.54	364.76	331.15	116.419	374.96	309.86	116.42	312.16	116.419	438.82	340.96	116.42	317.24	116.418	327.57	116.418	330.36	116.419	387.93	116.421	216.95	116.42	338.62	324.06	116.419	294.49	116.419	333.02	357.94	116.418	372.69	116.419	411.5	116.421	429.19	116.418	321.16	322.03	116.418	351.48	349.75	116.421	303.04	354.22	116.418	326.27	248.15	116.419	475.54
117.071	399.35	361.02	330.82	117.069	375.57	311.28	117.07	311.66	117.069	439.49	340.62	117.069	316.55	117.068	327.63	117.068	329.58	117.07	387.4	117.069	215.74	117.068	338.6	323.61	117.068	294.65	117.069	333.41	357.73	117.068	372.2	117.069	411.31	117.07	428.67	117.07	322.12	322.17	117.069	345.48	349.25	117.069	303	354.56	117.068	325.62	246.55	117.07	473.56
117.719	410.47	359.59	332.74	117.72	375.93	311.27	117.72	311.11	117.719	437.75	341.04	117.719	317.55	117.717	326.83	117.717	329.99	117.72	386.53	117.719	215.85	117.718	338.5	323.65	117.72	294.86	117.719	333.73	357.81	117.718	372.29	117.719	411.71	117.72	426.44	117.718	321.12	323.69	117.719	342.65	350.85	117.721	302.5	354.05	117.718	325.3	246.28	117.72	473.26
118.371	418.14	370.03	388.76	118.368	375.83	311.1	118.369	311.68	118.369	433.46	341.59	118.369	317.3	118.369	327.08	118.369	329.29	118.366	386.9	118.369	215.01	118.368	339.09	323.92	118.368	295.01	118.369	333.24	357.78	118.368	372.47	118.369	411.97	118.37	427.48	118.37	321.07	323.83	118.37	346.93	350.21	118.368	303.21	355.52	118.368	323.91	245.62	118.37	474.14
119.02	402.4	373.1	409.19	119.02	376.4	311.75	119.02	312.35	119.019	434.3	341.84	119.019	318.55	119.019	326.69	119.018	329.55	119.019	388.19	119.021	215.21	119.019	339.22	323.9	119.018	294.83	119.02	333.2	357.82	119.018	372.58	119.019	411.57	119.02	427.52	119.018	321.88	323.97	119.018	351.83	338.85	119.02	303.05	354.39	119.018	324.93	246.68	119.02	473.71
119.668	397.04	374.03	418.29	119.668	375.81	312.15	119.669	312.34	119.669	433.94	340.4	119.669	317.41	119.669	327.41	119.668	329.76	119.665	387.59	119.669	213.92	119.669	338.84	324.47	119.67	295.25	119.668	335.27	357.67	119.669	372.28	119.669	411.23	119.67	426.88	119.67	321.39	324.11	119.67	355.91	333.04	119.67	304.39	355.55	119.669	325.48	246.1	119.67	473.8
120.319	395.22	369.46	418.48	120.32	376.86	311.83	120.319	312.08	120.318	433.83	340.94	120.319	318.05	120.319	327.56	120.317	329.81	120.32	387.97	120.32	212.38	120.318	339.81	325.01	120.319	295.14	120.319	335.7	357.59	120.318	372.49	120.319	411.38	120.32	426.37	120.319	320.49	323.27	120.319	357.35	344.52	120.318	318.82	354.88	120.317	324.98	247.35	120.32	474.33
120.969	394.42	367.3	415.96	120.97	376.29	282.8	120.969	312.44	120.968	434.8	340.2	120.969	317.99	120.969	328.02	120.969	329.18	120.966	387.94	120.97	214.13	120.969	339.41	324.49	120.97	295.39	120.969	335.15	357.73	120.969	372.55	120.969	411.39	120.97	426.11	120.969	320.77	323.67	120.969	359.76	349.49	120.97	323.43	356.48	120.968	326.21	247.24	120.97	473.67
121.621	389.83	354.29	396.75	121.62	377.11	267.53	121.619	312.65	121.618	435.47	340.69	121.619	317.47	121.619	327.45	121.617	329.31	121.615	387.07	121.62	214.46	121.618	339.68	324.71	121.62	296.01	121.619	333.87	357.63	121.618	372.41	121.618	411.4	121.62	426.98	121.619	321.98	323.18	121.618	361.17	349.34	121.62	320.25	355.43	121.619	326.74	246.96	121.619	471.31
122.269	390.03	350.07	374.14	122.269	377.33	262.51	122.27	313.01	122.268	437.31	341.32	122.269	317.69	122.269	326.76	122.267	329.15	122.269	387.19	122.27	212.82	122.27	339.22	324.73	122.271	295.57	122.267	333.62	357.73	122.27	372.93	122.268	411.46	122.269	426.41	122.269	322.82	322.82	122.269	362.32	347.5	122.27	311.68	356.19	122.269	327.15	246.33	122.269	472.47
122.919	390.23	350.47	363.65	122.92	377.28	266.52	122.92	313.21	122.918	436.83	341.4	122.919	317.87	122.919	326.82	122.919	329.13	122.919	387.43	122.92	214.1	122.919	340.34	325.39	122.919	295.41	122.92	332.89	357.32	122.918	373.04	122.919	411.19	122.919	425.98	122.919	321.97	321.96	122.919	364.44	348.17	122.92	307.04	356.53	122.919	328.07	246.77	122.918	471.89
123.569	388.49	351.49	357.34	123.568	379.39	278.75	123.57	312.47	123.568	437.26	340.58	123.569	318.32	123.57	327.01	123.563	329.1	123.569	386.97	123.57	212.1	123.569	339.67	326.26	123.571	295.64	123.568	332.51	357.58	123.57	372.98	123.569	411.51	123.57	424.76	123.569	323.01	322.23	123.569	365.18	348.74	123.57	305.12	357.23	123.569	327.37	246.54	123.57	470.77
124.219	387.52	350.99	354.26	124.22	379.26	287.24	124.218	312.49	124.218	437.39	338.96	124.219	317.49	124.218	327.19	124.219	328.82	124.221	387.65	124.22	214.36	124.219	340.3	325.78	124.219	295.54	124.218	331.7	358.15	124.218	372.69	124.219	410.87	124.22	424.75	124.214	321.46	322.92	124.219	366.53	347.76	124.22	305.13	356.66	124.218	324.73	246.48	124.218	471.2
124.869	385.07	351.48	350.02	124.868	378.66	291.84	124.869	311.69	124.868	437.57	339.67	124.869	317.59	124.87	327.03	124.863	328.27	124.869	386.62	124.87	215.4	124.868	340.88	325.1	124.871	295.77	124.868	332.1	358.01	124.869	372.59	124.869	411.49	124.87	424.02	124.87	322.53	324.03	124.869	366.1	347.05	124.87	303.38	356.7	124.869	324.15	246.11	124.87	471.41
125.521	383.53	354.32	348.74	125.52	378.32	296.71	125.519	311.56	125.517	439.17	338.94	125.519	318.67	125.52	327.36	125.519	329.3	125.519	387.3	125.519	215.68	125.519	341.18	324.45	125.519	295.39	125.518	332.51	358.04	125.518	372.53	125.519	411.07	125.52	423.55	125.519	322.03	323.31	125.519	365.38	347.16	125.52	303.36	357.15	125.518	324.52	247.24	125.518	470.12
126.169	384.29	353.53	346.07	126.168	377.1	298.42	126.169	311.78	126.169	438.86	339.13	126.169	319.02	126.168	327.23	126.167	328.96	126.169	387.66	126.17	215.31	126.17	341.07	324.76	126.166	295.42	126.168	333.11	357.9	126.168	373.03	126.169	411.36	126.17	423.28	126.169	321.98	324.01	126.169	365.45	347.03	126.17	302.71	356.87	126.168	323.62	246.71	126.17	471.43
126.821	384.75	351.38	346.5	126.819	376.32	300.96	126.819	312.16	126.818	438.46	339.91	126.819	319.27	126.82	326.76	126.819	329.44	126.819	387.32	126.82	215.57	126.819	341.32	324.26	126.82	295.72	126.82	333.88	357.9	126.818	372.59	126.818	411.14	126.82	422.59	126.819	321.65	322.71	126.82	364.93	347.78	126.82	303.61	357.66	126.818	324.22	248.5	126.818	470.09
127.469	384.09	351.26	344.22	127.469	376.93	301.96	127.469	312.21	127.468	438.34	340.15	127.469	318.26	127.47	326.67	127.467	329.04	127.47	386.99	127.47	213	127.469	341.54	324.41	127.471	295.43	127.468	333.54	358.04	127.468	372.8	127.468	411.49	127.469	423.19	127.469	321.56	323.74	127.468	366.72	348.9	127.47	304.2	357.45	127.468	324.07	249.62	127.469	470.14
128.121	383.32	350.43	343.55	128.119	376.45	303.73	128.119	311.74	128.118	438.62	340.07	128.118	319.06	128.12	326.06	128.119	329.12	128.12	387.19	128.12	216.66	128.119	341.2	324.94	128.12	295.14	128.118	333.45	357.61	128.118	373.03	128.12	411.38	128.119	424.59	128.119	321.99	323.12	128.12	367.1	348.52	128.12	304.27	357.67	128.118	325.19	249.34	128.119	469.48
128.769	382.59	351.44	341.46	128.769	376.22	304.49	128.769	311.24	128.768	438.11	341.57	128.768	319.06	128.769	326.58	128.768	328.9	128.77	387.14	128.77	216.74	128.769	339.68	325.74	128.77	295.16	128.768	332.55	357.86	128.768	372.4	128.768	417.75	128.769	423.16	128.769	321.18	323.34	128.768	368.42	349.24	128.768	303.27	356.87	128.77	325.13	248.65	128.769	471.27
129.42	381.01	353.14	341.1	129.419	376.66	305.89	129.419	311.89	129.417	435.63	342.39	129.418	319.01	129.419	326.92	129.414	329.38	129.42	387.39	129.42	214.8	129.419	350.62	325.94	129.42	295.4	129.42	332.88	358.14	129.418	372.55	129.42	423.14	129.419	424.75	129.418	320.78	322.31	129.42	367.86	348.48	129.42	303.82	356.94	129.419	324.98	246.16	129.419	469.83
130.07	381.4	355.96	340.19	130.069	375.84	306.8	130.07	312.13	130.069	437.91	341.95	130.068	319.01	130.069	327.26	130.068	329.21	130.07	386.34	130.07	217.16	130.069	356.17	326.22	130.069	295.44	130.068	333.01	357.83	130.068	372.65	130.068	422.8	130.069	425.44	130.07	320.83	321.05	130.068	368.14	349.01	130.068	304.43	356.79	130.068	324.97	244.93	130.069	470.72
130.719	382.57	353.92	356.21	130.718	376.39	306.16	130.718	312.17	130.718	441.48	342.41	130.718	318.32	130.719	326.93	130.713	329.38	130.72	386.73	130.719	215.79	130.718	345.98	325.86	130.719	295.13	130.718	333.21	358.42	130.719	372.76	130.72	418.09	130.719	426.45	130.719	321.65	314.26	130.719	367.5	349.41	130.72	305.23	356.51	130.72	324.8	246.25	130.719	470.98
[truncated: 722 more rows]
[truncated: 25 more columns]

## Sheet: Figure 5-supplement 1D-CBX
Before								CBX100uM								CBX washout
[truncated: 1,117 more rows]

## Sheet: Figure 5-supplement 1D-18b
Before								18b-GA100uM								Washout
[truncated: 1,117 more rows]

## Sheet: Figure 5-supplement 1E
Before														18b-GA20uM								18b-GA100uM
[truncated: 430 more rows]
