# Supplementary material for: The gut contractile organoid for studying the gut motility regulated by coordinating signals between interstitial cells of Cajal and smooth muscles
Source: eLife. 2025 Aug 22;13:RP97860. doi: 10.7554/eLife.97860 (PMC12373395; doi:10.7554/eLife.97860)
Supplement: Figure 5—source data 1. [file elife-97860-fig5-data1.xlsx]

## Sheet: Fig5ABC-timelapse
SMC								ICC								ICC/SMC
Before				CBX100uM				Before				CBX100uM				Before			CBX100uM
Time[s]	#1(EGFP)	#2(EGFP)	#3(EGFP)	Time [s]	#1 (EGFP)	#2 (EGFP)	#3 (EGFP)	Time [s]	#1 (EGFP)	#2 (EGFP)	#3 (EGFP)	Time [s]	#1 (EGFP)	#2 (EGFP)	#3 (EGFP)	Time [s]	#1 (ICC)	#2 (SMC)	Time [s]	#1 (EGFP)	#2 (EGFP)
0.065	130.5	109.4	158.74	0.065	256.48	114.15	214.37	0.065	201.1	115.29	137.39	0.065	180.88	166.16	188.88	0.065	201.1	141.36	0.065	180.88	232.37
1.242	130	91.61	165.8	1.243	256.19	90.03	196.98	1.242	205.2	99.51	128.95	1.243	155.6	124.61	189.38	1.242	205.2	153.53	1.243	155.6	185.21
2.411	157.09	102.78	171.03	2.41	240.74	123.04	180.85	2.411	223.28	112.02	127.7	2.41	182.94	150.4	175.25	2.411	223.28	149.83	2.41	182.94	173.42
3.579	142.29	105.15	188.08	3.578	265.97	107.04	191.49	3.579	229.07	104.94	131.61	3.578	170.23	154.24	180.34	3.579	229.07	146.84	3.578	170.23	183.54
4.747	138.12	103.02	147.7	4.746	262.44	98.92	198.16	4.747	221.04	112.05	147	4.746	174.77	168.35	206.94	4.747	221.04	166.3	4.746	174.77	201.35
5.915	152.84	99.18	153	5.916	478.58	151.18	612.34	5.915	217.59	104.02	142.63	5.916	344.01	505.24	979.4	5.915	217.59	151.74	5.916	344.01	586.36
7.083	139.86	91.91	171.68	7.084	684.76	217.08	793.27	7.083	227.66	105.82	120.33	7.084	334.78	365.88	493.8	7.083	227.66	138.39	7.084	334.78	739.94
8.251	282.39	149.53	563.12	8.256	541.52	132.66	617.33	8.251	1057.55	669.47	1237.28	8.256	199.07	173.61	207.3	8.251	1057.55	552.7	8.256	199.07	678.82
9.419	259.08	217.74	525.51	9.424	392.07	104.46	474.2	9.419	587.65	345.27	339.73	9.424	213.92	160.96	199.32	9.419	587.65	524.12	9.424	213.92	498.43
10.59	186.22	168.99	358.62	10.594	294.65	108.13	410.63	10.59	268.97	118.1	172.52	10.594	179.9	125.55	191.59	10.59	268.97	404.53	10.594	179.9	433.06
11.758	169.11	135.04	267.04	11.762	242.96	106.47	326.39	11.758	248.66	122.95	152.91	11.762	200.44	141.88	188.92	11.758	248.66	290.54	11.762	200.44	354.18
12.926	148.21	116.52	183.69	12.934	245.44	114.51	283.29	12.926	204.64	121.78	144.13	12.934	167.62	129.01	189.13	12.926	204.64	232.02	12.934	167.62	294.21
14.095	132.74	107.98	221.57	14.105	240.88	116.97	203.32	14.095	225.91	114.97	142.57	14.105	169.1	150.8	206.48	14.095	225.91	164.67	14.105	169.1	210.92
15.264	135.62	105.91	197.14	15.274	254.82	107.02	210.01	15.264	195.51	122.91	131.75	15.274	170.75	144.48	204.12	15.264	195.51	157.25	15.274	170.75	214.52
16.432	154.27	105.22	166.52	16.442	245.84	100.83	181.05	16.432	240.31	105.57	159.46	16.442	175.61	140.31	205.24	16.432	240.31	156	16.442	175.61	187.49
17.6	157.99	102.04	174.78	17.614	256.36	95.78	184.94	17.6	229.28	111.84	138.63	17.614	212.69	139.69	165.95	17.6	229.28	164.41	17.614	212.69	176.48
18.767	118.13	101.63	168.3	18.784	228.37	106.96	184.21	18.767	220.04	117.5	146.63	18.784	151.18	140.17	174.14	18.767	220.04	146.71	18.784	151.18	185.48
19.936	142.78	100.61	187.08	19.956	252.24	113.7	202.35	19.936	190.18	126.48	135.38	19.956	193.06	144.97	190.62	19.936	190.18	145.35	19.956	193.06	198.02
21.104	131.04	113.26	248.48	21.129	253.22	104.6	200.68	21.104	229.91	162.45	145	21.129	175.32	132.42	197.28	21.104	229.91	178.36	21.129	175.32	175.46
22.272	266.08	167.74	550.23	22.3	253.72	89.72	218.95	22.272	949.19	709.16	1222.83	22.3	183.77	143.73	196.66	22.272	949.19	513.57	22.3	183.77	213.57
23.44	225.96	175.67	429.71	23.471	789.26	251.1	748.86	23.44	442.29	273.89	249.84	23.471	477.6	393.72	977.28	23.44	442.29	439.14	23.471	477.6	633.52
24.608	171.62	142.16	298.62	24.644	676.66	180.56	834.9	24.608	275.39	114.63	130.73	24.644	187.82	177.9	300.49	24.608	275.39	344.01	24.644	187.82	715.37
25.776	140.61	132.09	240.52	25.814	579.19	127.17	739.27	25.776	244.53	99.12	149.83	25.814	171.36	147.61	218.91	25.776	244.53	263.57	25.814	171.36	680.19
26.944	171.68	139.24	220.07	26.986	413.31	113.82	652.1	26.944	241.83	127.33	142.99	26.986	194.25	153.44	205.3	26.944	241.83	196.53	26.986	194.25	602.16
28.111	122.98	113.88	196.29	28.158	283.12	116.01	558.92	28.111	219.12	96.88	142.73	28.158	175.68	128.57	180.84	28.111	219.12	197.04	28.158	175.68	535.9
29.28	122.87	105.82	194.21	29.328	787.51	265.94	834.11	29.28	217.55	113.6	149.86	29.328	394.74	433.12	893.55	29.28	217.55	170.29	29.328	394.74	757.44
30.448	148.06	105.17	178.1	30.5	615.03	173.07	747.2	30.448	229.39	108.62	142.26	30.5	188.86	208.73	268.89	30.448	229.39	151.6	30.5	188.86	700.56
31.616	157.16	94.47	178.07	31.673	484.66	112.43	540.93	31.616	236.14	106.6	134.17	31.673	163.64	162.9	189.14	31.616	236.14	147.81	31.673	163.64	489.17
32.784	150.07	112.5	216.4	32.846	364.06	123.01	393.53	32.784	237.67	114.88	160.51	32.846	188.93	151.82	198.22	32.784	237.67	147.22	32.846	188.93	361.35
33.952	131.25	104.95	193.95	34.017	300.91	95.24	325.25	33.952	195.82	135.74	154.65	34.017	161.42	125.74	197.61	33.952	195.82	139.26	34.017	161.42	293.04
35.118	151.52	99.18	228.33	35.189	254.56	108.7	263.61	35.118	222.91	127.66	136.18	35.189	157.31	151.18	214.71	35.118	222.91	149.6	35.189	157.31	239.62
36.286	133.34	100.88	184.83	36.359	255.43	90.71	224.4	36.286	202.32	114.02	148.36	36.359	167.69	149.47	199.37	36.286	202.32	151.74	36.359	167.69	257.69
37.454	131.4	81.43	214.1	37.531	238.28	116.57	218.3	37.454	203.12	120.31	121.1	37.531	182.34	173.36	188.17	37.454	203.12	136.28	37.531	182.34	210.88
38.623	129.18	123.19	208.38	38.703	206.12	96.43	201.17	38.623	217.49	112.74	152.32	38.703	175.01	152.07	200.08	38.623	217.49	158.24	38.703	175.01	201.53
39.791	139.33	89.47	177.02	39.873	661.07	181.28	622.61	39.791	223.32	98.67	129.93	39.873	407.16	389.15	859.67	39.791	223.32	151.98	39.873	407.16	560.64
40.959	123.6	93.67	168.45	41.046	531.2	157.67	489.79	40.959	197.56	116.82	126.36	41.046	175.11	237.49	298.65	40.959	197.56	175.01	41.046	175.11	451.17
42.127	174.6	150.16	523.93	42.216	402.33	100.85	355.16	42.127	883.57	584.5	1025.62	42.216	148.75	133.29	207.03	42.127	883.57	506.98	42.216	148.75	328.54
43.295	284.89	173.98	428.58	43.388	350.24	90.96	318.28	43.295	601	399.07	536.72	43.388	146.26	153.53	169.94	43.295	601	565.43	43.388	146.26	283.44
44.462	216.52	162.19	391.86	44.558	240.05	104.24	224.64	44.462	322.05	146.93	152.22	44.558	141.2	134.27	194.76	44.462	322.05	441.12	44.558	141.2	224.58
45.631	174.49	108.49	269.82	45.728	634.06	193.89	755.68	45.631	222.53	112.17	145.43	45.728	343.7	463.65	1087.61	45.631	222.53	316.95	45.728	343.7	649.38
46.797	153.88	109.96	218.49	46.9	597.06	194.06	617.75	46.797	206.27	113.57	137.02	46.9	186.78	240.22	367.91	46.797	206.27	234.55	46.9	186.78	514.78
47.965	153	104.44	188.83	48.072	538.33	141.4	467.33	47.965	216.44	137.88	156.61	48.072	156.38	178.66	227	47.965	216.44	185.12	48.072	156.38	407.38
49.133	148.42	112.41	202.12	49.24	395.31	128.93	344.58	49.133	212.57	114.95	162.84	49.24	154.13	166.22	227.01	49.133	212.57	175.05	49.24	154.13	328.08
50.299	156.13	105.93	184.21	50.408	281.38	102.19	267.21	50.299	233.12	111.38	140.66	50.408	178.09	147.76	211.33	50.299	233.12	149.31	50.408	178.09	247.45
51.468	145.7	103.78	197.27	51.579	237.81	96.34	229.05	51.468	197.55	102.02	149.51	51.579	138.19	133.83	210.22	51.468	197.55	153.67	51.579	138.19	188.19
52.636	133.6	96.78	195.71	52.747	247.39	110.43	212.52	52.636	198.88	113.14	120.32	52.747	195.92	162.72	199.14	52.636	198.88	184.81	52.747	195.92	193.38
53.802	141.57	98.75	213.08	53.915	261.93	116.31	234.02	53.802	225.28	124.08	149.4	53.915	156.55	155.04	192.58	53.802	225.28	155.02	53.915	156.55	198.61
54.971	130.05	104.54	228.63	55.083	233.89	79.72	225.06	54.971	222.51	118.04	133.69	55.083	174.09	162.52	194.74	54.971	222.51	140.27	55.083	174.09	200.7
56.138	124.36	121.69	204.92	56.251	259.74	115.97	184.25	56.138	176.01	126.61	132.95	56.251	166.02	142.18	173.82	56.138	176.01	135.09	56.251	166.02	196.45
57.306	138.32	98.48	153.21	57.423	259.33	90.47	188.98	57.306	214.9	117.91	135.58	57.423	178.99	145.12	171.79	57.306	214.9	159.5	57.423	178.99	195.99
58.478	130.41	108.78	197.95	58.594	230.77	117.15	200.96	58.478	235.5	109.6	155.16	58.594	150.56	127.79	181.35	58.478	235.5	156.47	58.594	150.56	186.17
59.646	139.62	100.53	169.6	59.76	221.64	98.81	197.88	59.646	236.14	95.82	122.29	59.76	178.27	127.58	172.17	59.646	236.14	140.95	59.76	178.27	216.46
60.818	127.57	100.53	158.51	60.933	216.13	108.16	205.26	60.818	206.48	109.95	127.71	60.933	185.55	172.04	194.83	60.818	206.48	130.57	60.933	185.55	194.76
61.986	176.27	149.35	498.09	62.101	695.08	226.44	746.38	61.986	844.84	580.35	1085.09	62.101	532.41	462.25	799.54	61.986	844.84	456.98	62.101	532.41	799.47
63.153	341.03	143.47	451.18	63.267	659.9	180.28	729.2	63.153	678.34	403.65	573.73	63.267	226.05	199.55	281.7	63.153	678.34	508.43	63.267	226.05	740.91
64.321	189.13	134.82	344.49	64.439	533.82	122.9	568.58	64.321	297.22	143.56	145.05	64.439	180.63	154.48	221.85	64.321	297.22	399.74	64.439	180.63	604.35
65.49	185.66	141.04	264.97	65.606	427.49	104.17	446.54	65.49	234.35	129.32	144.31	65.606	174.49	143.9	230.64	65.49	234.35	306.43	65.606	174.49	469.06
66.656	179.23	130.02	222.94	66.778	337.43	128.37	345.64	66.656	241.13	118.84	136.25	66.778	158.64	130.66	199.58	66.656	241.13	247.78	66.778	158.64	358.02
67.824	131.96	110.16	317.52	67.946	301.73	113.89	366.77	67.824	272.77	180.06	193.1	67.946	171.11	133.48	168.1	67.824	272.77	289.07	67.946	171.11	366.16
68.99	268.32	207.78	474.41	69.114	267.34	95.99	270.7	68.99	743.48	507.63	714.6	69.114	175.76	125.04	203.37	68.99	743.48	582	69.114	175.76	282.21
70.158	203.37	181.42	397.22	70.282	249.9	76.88	254.08	70.158	378.47	171.59	168.97	70.282	172.18	138.56	209.52	70.158	378.47	451.66	70.282	172.18	241.73
71.326	167.71	139.05	271.45	71.45	246.94	93.75	233.19	71.326	267.13	106.74	138.55	71.45	198.92	146.06	169.32	71.326	267.13	339.9	71.45	198.92	211.24
72.493	159.2	97.87	248.35	72.618	246.76	105.54	223.16	72.493	211.53	102.43	138.25	72.618	160.88	124.47	168.48	72.493	211.53	273.7	72.618	160.88	184.6
73.662	150	132.78	196.55	73.787	631.93	214.4	707.48	73.662	223.27	99.2	138.44	73.787	512.98	561.33	1016.41	73.662	223.27	219.67	73.787	512.98	752.99
74.829	150.3	116.54	202.03	74.954	528.76	242.04	647.49	74.829	219.12	122.59	136.04	74.954	201.33	246.33	291.25	74.829	219.12	192.53	74.954	201.33	672.73
75.997	129.83	119.84	190.48	76.123	438.6	170.79	521.67	75.997	229.41	112.91	140.84	76.123	166.48	167.57	191.89	75.997	229.41	180.09	76.123	166.48	520.94
77.165	150.15	118.09	183.37	77.292	365.87	131.43	423.56	77.165	214.28	130.62	121.81	77.292	168.6	135.18	215.29	77.165	214.28	169.53	77.292	168.6	448.37
78.331	129.39	111.64	145.56	78.458	273.89	92.16	349.8	78.331	196.26	110.02	143.66	78.458	159.23	156.33	194.59	78.331	196.26	153.24	78.458	159.23	353.3
79.499	150.51	111.66	184.74	79.626	267.54	118.46	266.65	79.499	214.66	122.9	147.05	79.626	179.55	130.97	175.07	79.499	214.66	179.99	79.626	179.55	290.83
80.666	150.29	95.4	162.67	80.794	232.33	108.08	234.44	80.666	237.88	118.55	154.3	80.794	196.93	143.03	163.96	80.666	237.88	190.85	80.794	196.93	213.19
81.833	136.55	101.33	199.59	81.96	253.22	119.51	238.64	81.833	213.74	121.34	135.63	81.96	159.23	144.6	163.06	81.833	213.74	156.3	81.96	159.23	215.42
83.001	137.42	112.94	167.44	83.128	264.19	104.31	180.06	83.001	193.64	115.98	146.5	83.128	180.86	151.02	161.31	83.001	193.64	150.4	83.128	180.86	152.84
84.168	126.02	88.73	182.64	84.296	277.11	80.28	198.74	84.168	202.84	112.88	139.82	84.296	170.72	120.8	183.75	84.168	202.84	153.87	84.296	170.72	188.4
85.336	125.11	95.93	168.53	85.464	251.59	102.33	191.46	85.336	216.37	99.13	150.87	85.464	161.78	145.96	206.11	85.336	216.37	149.72	85.464	161.78	176.39
86.504	201.08	155.93	524.36	86.633	251.34	105.99	178.72	86.504	897.36	556.6	1127.88	86.633	170.84	131.4	181.39	86.504	897.36	463.08	86.633	170.84	188.01
87.672	311.25	167.77	442.5	87.801	259.57	108.39	207.02	87.672	684.93	349.06	447.81	87.801	160.53	150.33	181.65	87.672	684.93	494.57	87.801	160.53	185.64
88.84	217.21	174.41	320.73	88.969	258.59	110.73	221.4	88.84	318.83	136.22	138.63	88.969	191.43	159.54	165.94	88.84	318.83	367.91	88.969	191.43	208.15
90.008	177.23	149.9	306.46	90.137	248.19	96.66	212.18	90.008	235.74	119.05	135.93	90.137	150.18	138.65	178.86	90.008	235.74	302.76	90.137	150.18	200.26
91.176	153.44	131.18	198.07	91.305	235.63	104.79	198.17	91.176	249.57	115.2	141.07	91.305	165.94	132.07	203	91.176	249.57	229.53	91.305	165.94	187.65
92.345	146.5	114.53	182.6	92.473	322.2	107.46	466.77	92.345	225.88	113.02	131.23	92.473	204.79	328.4	401.28	92.345	225.88	181.76	92.473	204.79	468.04
93.513	124.17	120.22	207.4	93.641	692.51	202.52	643.96	93.513	206.62	92.38	134.19	93.641	447.25	391.2	529.85	93.513	206.62	166.51	93.641	447.25	635.69
94.681	108.11	107.7	289.85	94.81	622.31	161.99	590.28	94.681	235.85	165.4	155.78	94.81	193.98	151.33	244.93	94.681	235.85	225.65	94.81	193.98	560.55
95.849	302.45	270.85	517.22	95.978	484.46	127.44	444.22	95.849	874.83	585.84	803.71	95.978	176.38	147.13	190.09	95.849	874.83	557.06	95.978	176.38	460.89
97.017	220.58	285.69	409.62	97.146	392.86	103.24	366.21	97.017	420.55	184.88	146.34	97.146	185.73	152.69	191	97.017	420.55	465.36	97.146	185.73	382.1
98.185	202.05	182.33	278.08	98.314	336.71	90.85	374.62	98.185	301.32	123.56	133.83	98.314	148.19	117.97	196.93	98.185	301.32	329.82	98.314	148.19	376.11
99.353	164.15	140.18	238.12	99.48	643.47	154.48	741.61	99.353	230.43	107.4	115.29	99.48	339.09	481.45	1067.8	99.353	230.43	233.36	99.48	339.09	707.94
100.519	126.98	134.56	208.96	100.648	670.56	189.45	707.5	100.519	232.11	120.9	143	100.648	247.01	257.38	393.49	100.519	232.11	178.1	100.648	247.01	669.65
101.687	144.33	105.69	197.25	101.816	543.65	125.3	553.34	101.687	230.52	109.53	143.27	101.816	199.74	172.33	220.05	101.687	230.52	188.78	101.816	199.74	548.08
102.853	119.11	118.95	180.13	102.983	437.01	118.19	463.58	102.853	235.59	112.14	149.15	102.983	166.55	109.07	196.11	102.853	235.59	154.93	102.983	166.55	451.17
104.021	150.26	100.44	175.59	104.152	374.49	118.49	389.33	104.021	216.89	103.04	138.5	104.152	167.88	154.76	183.97	104.021	216.89	157.26	104.152	167.88	349.49
105.19	148.85	102.78	196.55	105.319	304.53	111.56	419.27	105.19	229.67	123.35	125.8	105.319	165.55	189.88	188.55	105.19	229.67	170.43	105.319	165.55	436.03
106.357	143.84	102.94	152.74	106.486	843.6	219.27	743.96	106.357	231.98	106.9	131.5	106.486	528.22	449.75	704.13	106.357	231.98	140.02	106.486	528.22	737.57
107.525	195.97	158.43	528.63	107.654	673.26	160.78	773.91	107.525	870.64	534.79	961.32	107.654	206.9	252	278.28	107.525	870.64	442.81	107.654	206.9	728.74
108.693	339.11	150.5	438.32	108.822	590.66	140.87	618.91	108.693	599.15	347.73	375.5	108.822	136.08	147.82	236.34	108.693	599.15	499.67	108.822	136.08	573.46
109.861	284.27	126.95	356.62	109.99	407.26	113.27	555.35	109.861	275.33	113.76	151.09	109.99	172.08	141.39	221.5	109.861	275.33	355.18	109.99	172.08	594.96
111.029	172.37	101.59	268.73	111.158	353.92	92.87	460.83	111.029	238.74	111.38	144.28	111.158	154.2	131.08	187.23	111.029	238.74	262.82	111.158	154.2	479.64
112.197	175.33	128.89	192.15	112.326	297.46	120.37	384.74	112.197	184.4	108.74	129.53	112.326	177.32	133.55	202.63	112.197	184.4	202.94	112.326	177.32	395.93
113.365	161.11	117.41	195.07	113.495	266.13	115.88	285.36	113.365	230.44	112.03	126.3	113.495	155.6	138.55	188.69	113.365	230.44	207.19	113.495	155.6	296.76
114.534	147.52	125.76	191.07	114.662	278.45	82.33	281.95	114.534	197.01	115.74	135.12	114.662	166.89	162.12	164.32	114.534	197.01	159.35	114.662	166.89	287.51
115.701	145.61	120.71	180.95	115.83	262.03	121.72	209.77	115.701	214.15	113.01	154.3	115.83	161.38	143.34	181.39	115.701	214.15	162.67	115.83	161.38	214.81
116.87	142.1	100.11	178.24	116.998	276.24	121.79	194.09	116.87	211.69	108.87	120.73	116.998	161.53	157.31	182.7	116.87	211.69	167.94	116.998	161.53	190.63
118.036	159.07	149.97	449.44	118.166	258.75	94.25	191.95	118.036	377.85	374.75	324.18	118.166	165.18	123.72	169.81	118.036	377.85	313.53	118.166	165.18	193.72
119.204	337.2	161.1	496.85	119.334	262.02	87.88	213.96	119.204	841.46	558.34	658.27	119.334	173.6	154.58	197.98	119.204	841.46	492.64	119.334	173.6	195.21
120.372	189.74	169.67	346.09	120.503	258.54	101.18	200.9	120.372	366.88	173.4	170.3	120.503	188.37	127.8	194.64	120.372	366.88	373.67	120.503	188.37	187.65
121.54	194.91	138.89	244.55	121.671	399.25	186.72	564.36	121.54	218.98	113.32	165.13	121.671	281.87	432.39	745.39	121.54	218.98	281.19	121.671	281.87	506.3
122.708	155.7	128.36	219.42	122.84	616.44	292.89	632.51	122.708	229.03	140.09	175.25	122.84	300.56	276.56	487.05	122.708	229.03	226.65	122.84	300.56	508.58
123.876	145.31	120.17	217.74	124.007	611.21	193.7	518.61	123.876	214.56	110.75	144.9	124.007	171.26	181.26	228.68	123.876	214.56	177.26	124.007	171.26	501.69
125.044	136.99	110.49	187.12	125.173	492.42	132.78	438.78	125.044	215.62	125.9	151.74	125.173	158.53	133.73	184.69	125.044	215.62	198.64	125.173	158.53	456.08
126.213	129.22	92.99	179.57	126.341	395.13	124.78	348.99	126.213	228.03	114.89	145.52	126.341	175	139.09	188.47	126.213	228.03	148.71	126.341	175	338.9
127.381	137.02	117.09	166.21	127.509	359.2	104.61	342.72	127.381	234.9	126.57	142.37	127.509	174.23	142.79	192.57	127.381	234.9	168.41	127.509	174.23	332.25
128.55	134.11	116.25	154.21	128.677	745.75	236.21	764.78	128.55	190.89	112.3	135.76	128.677	351.41	341.64	740.85	128.55	190.89	166.15	128.677	351.41	656.36
129.718	178.86	210.02	479.17	129.849	653.91	187.31	607.78	129.718	652.39	552.2	930.09	129.849	200.22	183.62	236.1	129.718	652.39	420.93	129.849	200.22	547.7
130.886	327.23	194.11	491.03	131.017	519.33	145.4	434.38	130.886	634.17	484.38	594.37	131.017	184.77	151.47	202.99	130.886	634.17	498.86	131.017	184.77	407.35
132.054	211.79	164.6	371.17	132.188	362.58	126	316.93	132.054	302.75	148.46	143.52	132.188	187.44	134.08	198.98	132.054	302.75	423.96	132.188	187.44	307.19
133.222	189.48	122.52	292.04	133.358	318	134.87	262.48	133.222	233.72	109.49	165.24	133.358	142.82	134.37	215.34	133.222	233.72	326.18	133.358	142.82	240.71
134.389	168.21	114.69	204.3	134.527	271.38	121.44	233.12	134.389	196.05	96.02	127.99	134.527	152.31	126.53	192.6	134.389	196.05	235.33	134.527	152.31	211.02
135.558	136.87	104.33	175.3	135.699	289.55	99.49	236.79	135.558	204.12	108.83	125.71	135.699	171.46	168.29	177.09	135.558	204.12	177.6	135.699	171.46	201.1
136.725	127.5	118.04	196.07	136.867	281.66	91.21	218.47	136.725	201.58	103.19	131.7	136.867	143.07	142.75	182.45	136.725	201.58	161.89	136.867	143.07	181.26
137.891	139.2	88.19	181.23	138.04	243.65	108.46	188	137.891	236.97	129.49	154.81	138.04	164.23	154.11	166.23	137.891	236.97	161.21	138.04	164.23	182.36
139.059	144.55	87.72	185.62	139.21	243.39	97.37	181.79	139.059	240.07	116.18	128.26	139.21	162.55	156.87	199.17	139.059	240.07	137.67	139.21	162.55	182.79
140.227	225.56	176.81	603.11	140.382	259.43	106.88	210.86	140.227	786.05	612.61	871.26	140.382	171.39	138.01	181.6	140.227	786.05	511.88	140.382	171.39	206.29
141.395	302.14	190.6	482.69	141.549	246.82	89.54	191.8	141.395	618.11	404.54	407.59	141.549	160.04	149.73	163.88	141.395	618.11	519.9	141.549	160.04	183.83
142.563	182.04	153.04	350.45	142.72	248.04	98.82	192.18	142.563	289.2	165.15	138.06	142.72	169.35	142.54	203.92	142.563	289.2	373.96	142.72	169.35	180.67
143.731	182.98	134.83	235.01	143.89	217.58	94.73	202.78	143.731	255.83	122.55	151.78	143.89	163.27	147.97	197.68	143.731	255.83	276.35	143.89	163.27	172.83
144.9	150.07	119.75	210.63	145.058	659.69	211.52	660.59	144.9	203.71	125.67	152.65	145.058	467.58	518.69	1075.81	144.9	203.71	226.86	145.058	467.58	716.13
146.067	153.03	99.22	210.25	146.23	605.92	179.42	723.76	146.067	232.72	103.38	147.92	146.23	247.1	220.9	356.64	146.067	232.72	182.5	146.23	247.1	690.62
147.235	146.82	105.46	191.91	147.4	437.36	131.89	589.09	147.235	205.29	104.97	149.86	147.4	185.79	159.45	195.98	147.235	205.29	153.78	147.4	185.79	615.02
148.403	185.31	154.65	396.27	148.572	365.4	95.26	529.57	148.403	377.62	294.85	317.81	148.572	170.77	132.49	227.79	148.403	377.62	337.09	148.572	170.77	487.11
149.569	298.63	190.14	508.9	149.743	303.34	102.64	405.69	149.569	723.87	507.87	773.78	149.743	166.07	152.92	192.62	149.569	723.87	497.33	149.743	166.07	428.84
150.737	209.21	185.05	369.37	150.916	274.75	105.12	351.36	150.737	283.87	155.38	157.66	150.916	167.55	154.78	205.61	150.737	283.87	403.32	150.916	167.55	352.43
151.905	217.9	142.6	263.97	152.084	309.48	140.56	576.31	151.905	233.49	109.07	152.77	152.084	237.03	296.22	381.6	151.905	233.49	285.6	152.084	237.03	518.29
153.072	158.7	104.67	249.39	153.252	728.61	245	686.38	153.072	224.99	127.82	133.56	153.252	359.57	328.07	548.48	153.072	224.99	232.05	153.252	359.57	614.63
154.241	167.52	112.28	232.57	154.42	574.68	159.29	547.03	154.241	209.1	121.57	144.27	154.42	145.21	169.03	238.51	154.241	209.1	189.37	154.42	145.21	529.81
155.41	153.3	107.55	197.51	155.592	483.07	118.81	379.28	155.41	207.02	90.83	152.74	155.592	150.18	153.46	182.86	155.41	207.02	175.83	155.592	150.18	403.31
156.577	142.71	120.19	213.39	156.763	390.95	125.84	305.72	156.577	218.42	101.37	124.51	156.763	174.51	148.07	202.68	156.577	218.42	125.72	156.763	174.51	310.99
157.745	138.16	119.67	205.18	157.934	322.25	102.71	268.4	157.745	196.47	105.3	135.85	157.934	173.94	176.27	186.63	157.745	196.47	152.64	157.934	173.94	230.66
158.913	137.79	109.91	192.95	159.107	302.82	103.49	231.4	158.913	199.99	117.31	122.29	159.107	149.32	169.55	204.05	158.913	199.99	132.62	159.107	149.32	223.02
160.081	137.4	101.84	205.83	160.274	293.56	101.66	239.5	160.081	217.53	92.01	155.56	160.274	168.47	140.52	203.78	160.081	217.53	152.91	160.274	168.47	225.9
161.247	136.14	106.88	175.92	161.44	272.38	104.66	230.12	161.247	244.15	117.6	145.28	161.44	175.87	168.57	179.5	161.247	244.15	142.69	161.44	175.87	207.65
162.415	135.31	95.74	188.17	162.608	399.71	172.75	599.8	162.415	232.62	125.92	117.47	162.608	261.32	383.74	691.18	162.415	232.62	163.12	162.608	261.32	596.24
163.584	117.42	95.61	176.31	163.776	745.55	246.19	717.39	163.584	220.94	102.7	127.05	163.776	392.52	337.52	490.9	163.584	220.94	148.64	163.776	392.52	663.1
164.751	135.8	117.21	176.77	164.944	689.33	176.25	598.82	164.751	225.22	91.24	133.97	164.944	146.58	192.72	225.5	164.751	225.22	144.04	164.944	146.58	536.76
165.919	124.36	86.84	187.98	166.113	572.71	103.29	414.61	165.919	229.47	105.8	134.7	166.113	198.82	154.88	203.23	165.919	229.47	135.42	166.113	198.82	426.64
167.088	139.33	94.18	197.38	167.281	413.41	118.81	323.52	167.088	236.03	109.68	133.57	167.281	149.96	124.44	219.83	167.088	236.03	147.3	167.281	149.96	282.57
168.256	118.44	94.56	172.57	168.449	376.07	109.34	299.43	168.256	207.83	118.1	135.21	168.449	198.23	115.49	181.51	168.256	207.83	154.78	168.449	198.23	253.57
169.424	149.71	96.67	175.12	169.617	328.09	98.42	250.83	169.424	224.07	111.53	131.93	169.617	164.6	149.24	169.78	169.424	224.07	142.12	169.617	164.6	232.15
170.592	118.3	104.22	263.55	170.785	322.44	111.91	220.04	170.592	227.25	155.19	185.98	170.785	153.07	159.74	192.54	170.592	227.25	219.1	170.785	153.07	214.28
171.758	322.45	177.22	585.63	171.953	281.75	102.39	212.57	171.758	867.54	655.36	1100.59	171.953	175.52	121.11	178.48	171.758	867.54	571.09	171.953	175.52	187.56
172.927	241.08	162.26	478	173.121	282.84	116.93	188.96	172.927	532.5	246.94	267.71	173.121	182.13	118.76	169.87	172.927	532.5	535.09	173.121	182.13	163.54
174.094	218.79	139.81	355.5	174.289	266.11	109.56	165.37	174.094	285.33	134.26	137.65	174.289	180.26	140.2	175.36	174.094	285.33	390.06	174.289	180.26	148.21
175.262	193.16	121.14	238.06	175.458	246.91	111.42	220.52	175.262	242.58	109.03	155.25	175.458	163	165.22	185.07	175.262	242.58	282.65	175.458	163	193.37
176.431	182.83	119.25	220.25	176.624	785.56	227.35	638.76	176.431	232.72	118.77	136.82	176.624	483.43	409.81	645.73	176.431	232.72	223.23	176.624	483.43	618
177.598	172.79	104.22	212.36	177.793	727.01	160.93	716.25	177.598	190.08	114.47	153.01	177.793	226.2	181.99	237.27	177.598	190.08	181.06	177.793	226.2	572.66
178.766	148.68	103.11	193.38	178.959	582.38	167.46	549.39	178.766	217.78	114.49	145.79	178.959	155.16	138.18	183.77	178.766	217.78	160.71	178.959	155.16	484.08
179.934	144.2	106.49	196.26	180.125	473.09	127.83	467.82	179.934	213.56	102.09	127.33	180.125	183.68	160	199.54	179.934	213.56	123.4	180.125	183.68	450.29
181.102	181.74	158.87	395.7	181.293	381.22	140.92	373.76	181.102	414.12	294.76	314.88	181.293	168.66	134.74	196.83	181.102	414.12	310.36	181.293	168.66	386.46
182.271	324.77	163.65	506.97	182.461	332.88	121.35	315.08	182.271	671.87	533.63	657.41	182.461	178.59	138.07	201.16	182.271	671.87	565.61	182.461	178.59	319.9
183.438	233.61	143.9	364.93	183.629	377.56	92.57	280.63	183.438	355.84	179.65	139.36	183.629	157.57	164.73	182.08	183.438	355.84	426.39	183.629	157.57	267.27
184.606	164.24	141.09	254.67	184.797	704.4	190.15	619.03	184.606	246.21	107.87	175.16	184.797	463.62	530.03	1062.16	184.606	246.21	327.09	184.797	463.62	624.8
185.774	152.89	131.14	201.62	185.964	755.18	177.73	580.61	185.774	249.14	110.74	152.77	185.964	251.32	296.34	357.97	185.774	249.14	216.78	185.964	251.32	544.45
186.941	132.37	130.59	205.83	187.133	553.02	135.42	475.39	186.941	211.82	113.19	147.96	187.133	174.77	161.76	228.16	186.941	211.82	163.61	187.133	174.77	426.19
188.109	140.93	134.12	200.88	188.301	511.52	131.26	344.9	188.109	225.61	128.57	146.07	188.301	163.81	123	217.12	188.109	225.61	181.16	188.301	163.81	333.92
189.277	136.5	111.85	201.39	189.469	441.08	107.03	296.45	189.277	226.54	101.12	131.54	189.469	161.19	137.63	180.13	189.277	226.54	148.26	189.469	161.19	274.36
190.445	139.53	97.26	203	190.637	480.2	148.57	599.11	190.445	211.6	113.64	132.7	190.637	233.62	355.96	501.17	190.445	211.6	179.88	190.637	233.62	554.81
191.614	137.15	98.57	180.7	191.805	720.65	215.51	655.96	191.614	237.72	105.57	146.18	191.805	275.62	267.34	523.92	191.614	237.72	167.16	191.805	275.62	587.03
192.782	119.18	103.43	185.44	192.973	643.78	165.34	529.5	192.782	217.72	96.65	141.09	192.973	163.39	179.92	244.16	192.782	217.72	140.39	192.973	163.39	487.81
193.95	139.39	102	166.01	194.139	477.4	123.8	339.33	193.95	205.87	110.16	141.81	194.139	171.73	130.02	180.93	193.95	205.87	149.89	194.139	171.73	287.18
195.118	160.28	107.09	179.83	195.306	425.08	111.69	249.07	195.118	256.82	120.34	146.12	195.306	180.67	130.96	198.26	195.118	256.82	158.46	195.306	180.67	245.67
196.285	122.36	101.01	213.04	196.475	352.53	101.12	226.48	196.285	266.1	98.51	138.87	196.475	165.56	131.63	192.65	196.285	266.1	150.88	196.475	165.56	221.89
197.454	142.22	102.59	182.34	197.642	318.34	97.04	199.8	197.454	223.01	110.35	110.29	197.642	181.12	157.98	209.89	197.454	223.01	159.25	197.642	181.12	186.38
198.62	143.94	97.07	210.51	198.811	315.65	111.06	204.76	198.62	211.57	107.87	146.18	198.811	169.65	128.92	201.28	198.62	211.57	141.96	198.811	169.65	207.67
199.788	131.4	125.37	193.26	199.979	286.47	94.47	220.16	199.788	240.05	102.35	135.84	199.979	162	121.97	194.23	199.788	240.05	151.49	199.979	162	182.94
200.956	153.92	95.93	172.15	201.147	278.19	104.43	209.37	200.956	213.18	114.53	135.58	201.147	186.66	155.49	194.29	200.956	213.18	168.84	201.147	186.66	208.51
202.122	132.54	89.46	194.24	202.315	287.88	84.03	218.02	202.122	220.04	114.16	129.38	202.315	178.34	191.33	172.75	202.122	220.04	140.6	202.315	178.34	210.96
203.29	129.66	109.34	181.69	203.482	239.88	121.55	229.71	203.29	216.98	118.94	146.27	203.482	177.51	169.76	170.47	203.29	216.98	121.9	203.482	177.51	227.35
204.458	148.57	97.84	174.62	204.65	293.47	92.45	198.63	204.458	241.28	106.84	105.54	204.65	181.74	149.15	192.5	204.458	241.28	153.91	204.65	181.74	176.71
205.626	127.56	104.19	178.01	205.819	253.13	120.11	210.75	205.626	228.98	110.45	146.15	205.819	169.27	187.9	174.49	205.626	228.98	140.72	205.819	169.27	199.04
206.794	167.28	85.73	155.86	206.987	237.24	81.57	186.5	206.794	266.54	96.6	118.03	206.987	173.81	158.09	186.55	206.794	266.54	156.54	206.987	173.81	171.65
207.961	146.56	89.32	185.59	208.155	249.25	105.58	223.11	207.961	208.04	104.46	128.52	208.155	180.53	137.11	175.19	207.961	208.04	155.7	208.155	180.53	170.25
209.129	165.47	89.1	192.28	209.323	271.31	98.78	202.01	209.129	234.15	98.53	138.62	209.323	137.09	154.12	174.69	209.129	234.15	135.98	209.323	137.09	189.35
210.297	153.96	99.11	183.81	210.491	280.28	95.64	217.64	210.297	233.2	112.83	120.03	210.491	153.72	134.46	169.54	210.297	233.2	154.88	210.491	153.72	244.21
211.465	140.68	84.27	153.78	211.66	235.23	98.78	205.29	211.465	244.56	106.57	129.9	211.66	191.73	158.33	176.63	211.465	244.56	152.95	211.66	191.73	217.56
212.633	135.5	99.95	176.2	212.828	251.77	82.04	201.2	212.633	255.67	126.08	156.61	212.828	141.61	171.78	175.22	212.633	255.67	148.2	212.828	141.61	209.78
213.801	139.15	114.78	182.77	213.997	267.2	90.47	200.23	213.801	252.8	90.03	139.52	213.997	169.72	157.22	172.68	213.801	252.8	135.67	213.997	169.72	190.58
214.968	169.31	78.98	195.68	215.165	215.88	85.44	214.58	214.968	219.98	113.09	124.36	215.165	167.41	159.22	156.26	214.968	219.98	137.55	215.165	167.41	203.46
216.136	144.65	103.57	168.38	216.333	252.88	72.09	183.66	216.136	221.83	114.34	142.07	216.333	175.22	141.74	171.99	216.136	221.83	171.71	216.333	175.22	184.19
217.303	136.1	87.82	219.33	217.501	322.94	108.44	499.08	217.303	233.22	101.15	152.78	217.501	210.71	350.91	343.98	217.303	233.22	165.32	217.501	210.71	443.26
218.471	158.83	100.9	198.25	218.669	687.59	257.01	873.42	218.471	247.82	115.88	126.54	218.669	433.45	338.62	591.08	218.471	247.82	157.41	218.669	433.45	763.21
219.64	158.18	105.17	174.63	219.837	547.19	197.94	790.28	219.64	255.7	109.74	143.66	219.837	194.75	212.44	260.47	219.64	255.7	170.66	219.837	194.75	748.97
220.808	154.09	98.67	163.05	221.005	454.27	145.27	665.2	220.808	210.48	110.09	165.12	221.005	171.1	150.99	194.78	220.808	210.48	141.87	221.005	171.1	572.52
221.976	157.29	120.88	164.4	222.171	366.2	97.76	473.96	221.976	176.83	107.86	115.2	222.171	158.38	116.58	189.29	221.976	176.83	142.19	222.171	158.38	427.39
223.144	158.05	92.98	171.34	223.34	283.11	96.93	391.32	223.144	210.9	123.42	130.96	223.34	185.72	130.2	183.89	223.144	210.9	150.15	223.34	185.72	388.1
224.312	153.75	93.88	181.51	224.512	276.76	128.09	307.64	224.312	205.05	101.45	130.31	224.512	156.82	125.6	184.01	224.312	205.05	169.59	224.512	156.82	312.33
225.48	146.03	96.74	201.26	225.682	297.23	103.93	274.15	225.48	205.41	107.87	141.01	225.682	161.31	136.29	218.82	225.48	205.41	138.85	225.682	161.31	252.83
226.647	172.38	69.84	180.31	226.854	235.29	122.37	259.86	226.647	223.97	111.02	138.9	226.854	153.27	144.07	169.17	226.647	223.97	166.63	226.854	153.27	255.49
227.816	149.4	104.47	171.61	228.022	258.59	121.48	265.69	227.816	207.67	103.58	136.51	228.022	158.61	140.74	162.61	227.816	207.67	173.62	228.022	158.61	224.89
228.984	143.57	95.1	181.4	229.19	243.63	103.62	224.79	228.984	209.88	99.75	130.38	229.19	192.69	128.46	184.09	228.984	209.88	161.53	229.19	192.69	208.61
230.15	167.79	104.38	204.22	230.358	253.57	97.15	221.12	230.15	197.15	113.74	162.5	230.358	179.32	152.69	172.86	230.15	197.15	157.05	230.358	179.32	177.98
231.318	159.08	82.46	185.27	231.527	263.72	109.08	188.68	231.318	221.85	114.49	113.33	231.527	160.21	167.62	189.35	231.318	221.85	141.97	231.527	160.21	168
232.486	142.34	90.86	180.45	232.695	257.64	95.24	213.67	232.486	204.59	138.32	126.67	232.695	142.01	146.91	220.37	232.486	204.59	154.22	232.695	142.01	169.85
233.652	136.66	77.89	182.83	233.863	244.34	112.85	200.97	233.652	218.76	152.16	140.38	233.863	205.45	125.1	169.08	233.652	218.76	152.78	233.863	205.45	218.49
234.821	138.64	101.8	199.05	235.031	247.79	100.6	236.1	234.821	202.14	126.86	128.74	235.031	184.69	134.85	184.84	234.821	202.14	175.01	235.031	184.69	252.76
235.993	291.27	150.41	587.81	236.199	263.81	127.43	300.56	235.993	915.02	682.84	1163.23	236.199	153.84	135.34	195.25	235.993	915.02	495.49	236.199	153.84	259.54
237.166	479.57	201.57	519.79	237.368	239.62	89.88	227.05	237.166	883.15	617.25	618.85	237.368	153.7	154.18	169.37	237.166	883.15	650.89	237.368	153.7	247.85
238.335	410.63	209.18	421.46	238.535	683.25	172.1	680.92	238.335	407.19	182.33	150.9	238.535	535.42	430.37	926.39	238.335	407.19	511.02	238.535	535.42	692.12
239.506	340.73	114.63	322.22	239.703	606.91	175.98	704.3	239.506	247.5	145.42	155.7	239.703	226.66	182.01	291.19	239.506	247.5	409.58	239.703	226.66	641.35
240.674	271.62	114.84	282.14	240.871	535.86	142.64	580.15	240.674	204.39	116.29	150.35	240.871	168.45	134.31	201.57	240.674	204.39	312.16	240.871	168.45	515.21
241.842	244.03	118	239.06	242.039	411.15	131.1	440.69	241.842	218.12	116.4	137.48	242.039	203.72	136.21	161.72	241.842	218.12	244.92	242.039	203.72	397.47
243.01	182.59	85.56	213.91	243.207	347.89	91.03	380.05	243.01	223.17	111.74	138.21	243.207	159.51	124.84	165.95	243.01	223.17	221.02	243.207	159.51	348.63
244.178	323.51	168.18	554.03	244.375	315.58	98.45	305.84	244.178	748	538.5	821.53	244.375	178.74	142.3	192.89	244.178	748	503.02	244.375	178.74	270.38
245.347	376.85	183.41	485.69	245.543	270.92	125.01	263.73	245.347	555.27	437.52	437.07	245.543	192.19	127.71	188.01	245.347	555.27	587.47	245.543	192.19	248.83
246.514	269.18	182.4	361.34	246.711	246.19	100.54	264.06	246.514	259.92	156.4	138.64	246.711	152.56	114.57	187.22	246.514	259.92	440.39	246.711	152.56	248.63
247.682	233.41	140.31	258.3	247.878	231.46	119.09	193.05	247.682	230.53	98.2	132.4	247.878	165.81	125.49	193.86	247.682	230.53	321.5	247.878	165.81	191.79
248.848	195.84	101.29	186.82	249.046	246.73	103.58	221.9	248.848	247.52	103.22	128.03	249.046	148.77	131.01	193.52	248.848	247.52	283.87	249.046	148.77	188.98
250.016	169.13	115.56	214.22	250.214	248.77	88.96	207.87	250.016	229.05	109.13	146.54	250.214	174.18	123.51	196.8	250.016	229.05	193.91	250.214	174.18	185.03
251.184	108.36	103.56	224.87	251.382	236.9	105.54	221.02	251.184	211.49	131.74	137.01	251.382	166.36	149.97	218.82	251.184	211.49	172.83	251.382	166.36	196.92
252.352	146.8	95.41	207.64	252.55	264.36	92.99	226.86	252.352	212.43	121.55	127.86	252.55	189.07	147.12	208.16	252.352	212.43	178.74	252.55	189.07	162.96
253.52	138.77	94.61	190.82	253.718	253.86	124.46	222.06	253.52	216.26	105.97	130.63	253.718	169.69	147.3	168.62	253.52	216.26	165.91	253.718	169.69	186.52
254.686	131.04	103.39	193.65	254.884	264.58	84.79	215.33	254.686	204.19	99.7	149.1	254.884	189.93	126.99	175.87	254.686	204.19	162.7	254.884	189.93	195.84
255.853	139.93	129.48	177.76	256.052	250.07	102.24	217.4	255.853	199.8	98.97	138.73	256.052	187.04	119.42	188.02	255.853	199.8	131.27	256.052	187.04	198.58
257.023	146.41	109.5	173.86	257.22	276.36	95.65	200.04	257.023	227.58	92.93	134.07	257.22	176.33	116.25	184.4	257.023	227.58	141.47	257.22	176.33	181.64
258.195	154.89	105.66	179.57	258.389	245.21	85.52	213.2	258.195	206.27	116.6	138.4	258.389	154.76	138.26	175.83	258.195	206.27	152.7	258.389	154.76	175.09
259.363	156.69	102.42	200.44	259.557	716.74	233.99	599.33	259.363	211.18	102.31	139.17	259.557	613.35	557.04	998.2	259.363	211.18	156.88	259.557	613.35	655.72
260.531	158.36	95.18	158.87	260.726	647.72	289.62	530.25	260.531	197.33	117.34	130.99	260.726	346.16	314.89	409.45	260.531	197.33	141.98	260.726	346.16	537.69
261.699	157.39	106.84	172.42	261.894	589.51	197.26	567.16	261.699	207.84	111.42	152.63	261.894	202.55	127.29	204.17	261.699	207.84	151.89	261.894	202.55	567.26
262.867	142.76	96.98	172.86	263.06	466.41	111.06	434.5	262.867	201.42	127.5	124.36	263.06	187.63	148.96	216.91	262.867	201.42	156.88	263.06	187.63	398.39
264.034	171.3	91.74	169.71	264.228	391.07	132.74	350.87	264.034	249.17	120.55	145.67	264.228	154.27	135.96	171.53	264.034	249.17	144.59	264.228	154.27	354.36
265.201	152.96	108.12	198.52	265.396	337.47	127.76	334.14	265.201	217.18	105.63	150.91	265.396	173.05	141.67	208.93	265.201	217.18	168.12	265.396	173.05	314.21
266.369	128.4	82.74	155.87	266.564	321.84	137.08	382.86	266.369	213.16	98.89	138.88	266.564	168.75	153.04	184.66	266.369	213.16	137.03	266.564	168.75	390.1
267.537	154.84	79.01	144.54	267.733	688.2	250.08	849.58	267.537	207.3	109.18	142.58	267.733	374.07	339.71	950.64	267.537	207.3	153.93	267.733	374.07	779.78
268.705	140.95	83.99	181.93	268.901	624.71	168.39	715.6	268.705	236.9	103.47	128.76	268.901	202.96	178.22	258.79	268.705	236.9	142.6	268.901	202.96	624.61
269.873	165.04	106.88	159.66	270.069	589.36	118.89	666.6	269.873	208.73	106.26	136.47	270.069	151.11	138.8	212.82	269.873	208.73	139.39	270.069	151.11	658.85
271.041	157.74	110.57	254.12	271.237	472.9	125.4	514.33	271.041	231.18	137.89	138.97	271.237	182.03	128.66	206.12	271.041	231.18	192.91	271.237	182.03	510.13
272.21	437.48	224.68	548.65	272.405	423.32	105.46	420.2	272.21	1038.29	571.75	1079.36	272.405	153.2	137.82	176.17	272.21	1038.29	551.98	272.405	153.2	402.3
273.378	379.88	221.18	418.19	273.573	688.85	160.45	833.71	273.378	432.33	155.46	238.44	273.573	357.61	477.35	1002.23	273.378	432.33	482.19	273.573	357.61	776.27
274.546	308.77	164.75	333.5	274.741	613.85	174.54	764.52	274.546	252.29	101.74	166.77	274.741	203.69	239.73	301.86	274.546	252.29	339.61	274.741	203.69	695.9
275.716	251.65	145.87	255.97	275.907	548.18	150.54	585.39	275.716	221.39	117.6	126.7	275.907	159.4	155.13	222.91	275.716	221.39	278.3	275.907	159.4	580.16
276.884	238.45	126.6	238.69	277.076	461.98	118.54	418.18	276.884	216.71	116.31	123.29	277.076	176.72	150.27	200.83	276.884	216.71	197.5	277.076	176.72	417.54
278.052	182.13	116.68	213.63	278.243	346.09	111.94	373.72	278.052	175.52	100.96	140.13	278.243	147.11	126.45	206.68	278.052	175.52	177.8	278.243	147.11	357.61
279.221	202.64	102.81	170.51	279.411	304.78	114.02	271.83	279.221	200.44	96.56	147.55	279.411	160.51	156.73	191.45	279.221	200.44	174.33	279.411	160.51	265.7
280.389	151.8	103.88	189.71	280.579	306.19	147.79	250.72	280.389	215.8	110.07	124.68	280.579	164.72	144.9	166.94	280.389	215.8	140.21	280.579	164.72	233.75
281.557	151.04	91.64	157.17	281.747	243.15	138.71	237.61	281.557	221.11	105.44	125.76	281.747	171.71	143.09	190.07	281.557	221.11	151.43	281.747	171.71	231.4
282.724	146.47	103.37	185	282.915	242.44	125.29	204.41	282.724	222.18	103.27	148.68	282.915	182.7	150.89	172.39	282.724	222.18	140.11	282.915	182.7	208.35
283.89	148.68	91.57	175.37	284.083	231.45	106.63	201	283.89	211	123.99	151.44	284.083	147.14	141.88	201.42	283.89	211	156.06	284.083	147.14	216.25
285.06	164.03	93.91	182.59	285.249	258.07	129.4	315.21	285.06	222.55	106.64	137.36	285.249	177.41	250.29	198.25	285.06	222.55	139.91	285.249	177.41	280.97
286.228	152.49	106.7	197.07	286.418	648.82	200.18	645.01	286.228	225.92	110.69	121.34	286.418	391.69	289.16	636.38	286.228	225.92	150.95	286.418	391.69	531.31
287.396	163.64	85.29	205.78	287.586	496.91	157.61	498.19	287.396	238.51	122.16	125.05	287.586	184.02	162.64	228.83	287.396	238.51	165.09	287.586	184.02	465.47
288.564	349.49	197.71	530.22	288.754	412.7	122.87	445.12	288.564	1001.53	566.34	1020.65	288.754	165.88	137.66	190.8	288.564	1001.53	517.67	288.754	165.88	425.85
289.732	360.07	250.22	398.01	289.922	320.78	107.64	356.99	289.732	479.26	203.73	188.06	289.922	155.44	117.48	189.04	289.732	479.26	514.6	289.922	155.44	319.67
290.901	241.03	169.95	275.87	291.09	278.35	97.92	284.28	290.901	281.09	119.97	122.39	291.09	158.12	126.55	201.12	290.901	281.09	386.41	291.09	158.12	294.63
292.07	214.76	123.28	227.74	292.258	296.21	118.25	385.43	292.07	230.27	118.52	131.59	292.258	181.03	207.9	205.63	292.07	230.27	294.56	292.258	181.03	324.34
293.238	191.28	99.35	200.1	293.426	665.42	177.79	657.39	293.238	227.69	102.44	149.74	293.426	371.91	360.91	670.37	293.238	227.69	213.12	293.426	371.91	552.97
294.406	154.64	93.12	193.69	294.592	519.13	122.21	589.04	294.406	207.82	96.63	110.44	294.592	167.23	176.62	243.85	294.406	207.82	202.63	294.592	167.23	559.65
295.574	253.32	168.14	433.68	295.761	400.32	120.24	444.1	295.574	565.29	359.83	346.14	295.761	171.89	156.43	184.39	295.574	565.29	404.08	295.761	171.89	403.16
296.74	326.03	233.87	451.78	296.929	320.59	102.07	384.03	296.74	621	366.82	557.3	296.929	166.13	129.03	210.33	296.74	621	555.57	296.929	166.13	372.42
297.91	265.42	220.64	399.41	298.097	294.92	97.55	324.62	297.91	292.96	115.16	145.21	298.097	152.69	131.93	189.22	297.91	292.96	388.33	298.097	152.69	284.04
299.077	187.52	145.18	246.37	299.265	252.98	87.01	244.83	299.077	258.6	119.67	150.2	299.265	155.64	140.72	176.5	299.077	258.6	318.48	299.265	155.64	253.07

## Sheet: Fig5D-timelapse
Before												CBX20uM														CBX100uM
Time[s]	#1 (ICC)	#2 (SMC)	Time[s]	#1 (ICC)	#2 (SMC)	Time [s]	#1 (ICC)	#2 (SMC)	Time [s]	#1 (EGFP)	#2 (EGFP)	Time[s]	#1 (ICC)	#2 (SMC)	Time[s]	#1 (ICC)	#2 (SMC)	Time [s]	#1 (L-ICC)	#2 (L-SMC)	#3 (R-ICC)	#4 (R-SMC)	Time [s]	#1 (EGFP)	#2 (EGFP)	Time[s]	#1 (ICC)	#2 (SMC)	Time[s]	#1 (ICC)	#2 (SMC)	Time[s]	#1 (ICC)	#2 (SMC)	Time[s]	#1 (ICC)	#2 (SMC)
0.065	201.1	140.61	0.066	191.49	183.9	0.065	33.54	25.97	-0.001	76.39	27.08	0.064	140.22	165	0.065	124.95	216.5	-0.001	220.36	422.1	68.79	156.93	-0.001	55.45	97.39	0.065	180.88	232.37	0.065	300.97	357.49	0.065	52.98	44.66	0.065	376.98	146.99
1.242	205.2	124.09	1.244	166.22	165.66	0.769	29.56	31.25	0.77	80.69	25.45	1.242	164.57	185.25	1.242	117.01	195.21	0.768	169.93	336.39	78.62	153.54	0.769	50.94	62.71	1.243	155.6	185.21	1.243	300.26	307.28	0.769	55.54	41.96	0.769	340.52	117.95
2.411	223.28	129.14	2.411	169.7	177.69	1.464	35.31	27.71	1.465	77.49	31.91	2.41	191.3	173.16	2.41	118.31	201.58	1.463	127.5	358.45	73.4	163.63	1.465	47.58	62.58	2.41	182.94	173.42	2.411	304.8	297.15	1.465	55.93	44.6	1.465	334.66	74.49
3.579	229.07	128.24	3.58	167.82	185.41	2.169	30.46	29.05	2.168	74.73	28.58	3.578	178.34	177.9	3.578	147.32	178.8	2.167	111.18	317.27	74.84	166.84	2.168	39.88	56.65	3.578	170.23	183.54	3.579	280.29	302.61	2.17	56.57	53.54	2.169	309.55	54.05
4.747	221.04	148.36	4.748	190.92	189.66	2.868	34.07	29.03	2.867	83.79	26.91	4.746	221.27	164.41	4.746	116.82	186.55	2.869	85.39	294.6	76.26	184.95	2.869	42.48	72	4.746	174.77	201.35	4.747	279.12	296.05	2.869	57.2	50.04	2.867	287	45.21
5.915	217.59	137.93	5.916	171.28	221.07	3.57	34.46	29.17	3.567	74.11	24.71	5.913	257.84	188.24	5.916	124.62	180.45	3.569	78.2	251.96	89.97	173.63	3.569	47.61	69.49	5.916	344.01	586.36	5.914	280.96	272.09	3.568	56.38	44.86	3.569	242.88	39.38
7.083	227.66	123.36	7.086	177.79	210.6	4.268	32.26	24.39	4.268	68.86	21.85	7.081	196.88	165.58	7.084	260.23	293.46	4.265	80.68	232.9	63.96	187.04	4.267	55.2	57.75	7.084	334.78	739.94	7.083	272.61	239.46	4.268	57.15	43.32	4.269	223.86	34.21
8.251	1057.55	480.18	8.254	217.61	191.65	4.969	32.83	27.89	4.968	69.37	28.97	8.249	181.82	208.01	8.252	498.49	629.82	4.968	124.61	227.47	76.43	205.68	4.969	45.46	60.03	8.256	199.07	678.82	8.252	278.44	266.38	4.97	52.69	44.36	4.97	199.92	35.15
9.419	587.65	489.33	9.422	190.77	248.79	5.669	30.94	25.87	5.664	71.11	26.12	9.415	166.12	163	9.42	257.51	550.49	5.669	103.01	228.71	73.29	182.26	5.665	40.19	53.71	9.424	213.92	498.43	9.42	281.42	338.06	5.669	53.69	39.06	5.669	173.33	32.34
10.59	268.97	405.74	10.59	200.14	202.42	6.368	29.75	26.23	6.367	74.89	26.32	10.584	165.81	175.71	10.589	146.27	383.28	6.37	86.56	209.26	78.26	185.19	6.37	47.09	65.54	10.594	179.9	433.06	10.588	268.5	334.33	6.369	55.05	42.59	6.369	146.04	30.68
11.758	248.66	268.49	11.756	194.41	198.61	7.07	26.51	26.54	7.067	74.23	26.71	11.752	143.56	189.25	11.758	121.81	330.24	7.068	75.17	197.66	77.81	195.67	7.068	42.07	77.64	11.762	200.44	354.18	11.756	285.59	297.32	7.069	58.5	37.86	7.068	130.03	31.23
12.926	204.64	211.14	12.924	223.24	169.07	7.769	29.82	26.14	7.768	79.5	27.79	12.92	166.74	174.26	12.926	125.59	254.09	7.769	89.13	202.08	81.36	191.98	7.769	44.2	56.84	12.934	167.62	294.21	12.924	308.41	292.82	7.768	55.11	42.33	7.768	118.98	28.85
14.095	225.91	186.5	14.092	188.54	194.24	8.47	33.67	26.62	8.469	77.76	23.11	14.088	130.95	170.94	14.094	109.54	221.33	8.469	83.38	207.7	77.08	166.79	8.469	44.11	73.38	14.105	169.1	210.92	14.092	317.08	281.75	8.468	59.06	39.27	8.469	113.46	29.64
15.264	195.51	168.45	15.259	187.73	168.66	9.17	29.78	25.99	9.165	83.47	24.84	15.254	147.51	169.94	15.262	111.38	179.7	9.169	84.96	196.73	81.92	179.02	9.169	42.93	64	15.274	170.75	214.52	15.26	283.36	261.66	9.169	56.9	39.05	9.169	112.53	37.11
16.432	240.31	160.01	16.427	204.47	180.62	9.87	25.76	32.58	9.869	75.57	31.84	16.422	172.95	171.49	16.431	112.6	160.73	9.869	102.99	203.48	70.92	172.65	9.868	36.24	75.64	16.442	175.61	187.49	16.428	279.56	267.72	9.869	56.28	41.3	9.867	103.78	29.76
17.6	229.28	149.6	17.595	165.73	167	10.57	30.94	27.89	10.568	77.2	23.23	17.59	164.42	178.09	17.599	140.35	158.66	10.569	80.8	201.81	70.71	162.37	10.568	47.37	66.57	17.614	212.69	176.48	17.596	273.07	298.72	10.568	56.23	41.76	10.569	107.97	27.34
18.767	220.04	140.22	18.763	160.12	161.5	11.27	30.67	25.24	11.268	79.89	26.13	18.759	252.47	171.26	18.766	116.47	172.19	11.27	77.98	193.11	67.84	158.39	11.268	38.93	65.49	18.784	151.18	185.48	18.764	282.86	298.74	11.27	54.23	41.97	11.269	108.48	38.5
19.936	190.18	126.02	19.932	185.98	159.56	11.97	33.43	29.79	11.969	79.02	25.4	19.927	292.12	157.63	19.934	123.57	147.61	11.971	72.5	180.05	73.01	170.42	11.968	51.8	57.64	19.956	193.06	198.02	19.933	284.82	335	11.969	57	38.97	11.967	103.6	32.53
21.104	229.91	160.24	21.101	195.95	143.14	12.669	32.18	26.94	12.669	77.23	28.13	21.095	271.9	173.23	21.102	122.84	152.72	12.67	75.59	166.28	58.83	180.46	12.669	41.8	58.83	21.129	175.32	175.46	21.099	289.08	370.96	12.67	51.42	39.66	12.668	95.75	29.49
22.272	949.19	451.31	22.27	157.63	134.09	13.368	29.03	21.09	13.37	74.72	25.66	22.263	207.84	183.68	22.27	162.44	150.68	13.37	79.51	178.29	67.36	174.74	13.37	52.44	64.83	22.3	183.77	213.57	22.265	264.27	331.02	13.369	53.63	40.3	13.368	97.47	31.07
23.44	442.29	387.65	23.436	167.91	185.69	14.069	30.81	29.74	14.068	76.5	29.98	23.431	182.16	165.35	23.438	137.98	161.6	14.07	62.99	172.35	75.91	140.19	14.07	46.58	76.74	23.471	477.6	633.52	23.433	277.12	323.29	14.07	54.77	37.37	14.068	100.02	29.41
24.608	275.39	278.23	24.604	213.49	227.61	14.769	33.08	31.08	14.77	101.33	46.77	24.598	142.94	202.31	24.606	126.77	163.68	14.771	69.53	151.95	70.18	164.54	14.768	42.25	60.77	24.644	187.82	715.37	24.601	270.72	318.33	14.77	55.21	42.39	14.768	92.83	29.34
25.776	244.53	236.95	25.772	177.54	213.11	15.467	31.29	27.14	15.468	139.93	70.92	25.767	182.08	194.71	25.774	136.48	155.55	15.469	100.47	158.12	66.75	152.35	15.468	40.69	66.19	25.814	171.36	680.19	25.77	315.84	405.44	15.47	56.8	38.88	15.469	91.1	28.3
26.944	241.83	185.22	26.94	179.71	165.28	16.169	28.96	27.31	16.17	173.57	67.3	26.937	184.73	180.11	26.942	120.83	142.3	16.169	81.72	158.42	63.35	172.74	16.168	39.11	46.33	26.986	194.25	602.16	26.939	311.36	429.54	16.17	52.42	41.71	16.167	89.45	31.06
28.111	219.12	138.88	28.108	192.52	179.15	16.867	30.81	33.45	16.867	179.1	74.23	28.104	179.34	187.88	28.11	131	166.83	16.87	85.61	173.65	75.07	160.14	16.867	45.22	62.81	28.158	175.68	535.9	28.107	322.12	370.09	16.868	53.2	47.09	16.867	95.29	32.15
29.28	217.55	149.49	29.276	184.61	172.93	17.569	32.3	28	17.569	195.31	77.72	29.272	243.8	172.64	29.278	131.21	161.65	17.569	106.27	170.42	71.75	170.96	17.567	41.25	58.91	29.328	394.74	757.44	29.275	301.12	330.91	17.57	54.29	42.38	17.568	98.83	25.44
30.448	229.39	127.63	30.444	190.66	184.29	18.267	33.76	29.74	18.269	193.26	81.2	30.44	208.69	162.73	30.446	146.45	164.91	18.269	95.82	165.58	77.31	174.88	18.268	46.99	53.57	30.5	188.86	700.56	30.443	287.31	334.86	18.27	54.31	42.75	18.267	92.47	30.98
31.616	236.14	136.26	31.612	182.28	143.53	18.968	27.17	28.17	18.97	196.21	74.25	31.608	205.59	225.85	31.614	134.66	164.5	18.969	78.43	182.85	92.27	174.51	18.969	82.24	98.94	31.673	163.64	489.17	31.611	321.08	378.22	18.97	49.97	39.41	18.968	104.94	27.2
32.784	237.67	113.84	32.78	197.42	294.99	19.668	30.95	28.3	19.669	176.33	67.91	32.776	182.73	175.33	32.782	137.79	196.95	19.669	79.69	166.22	66.71	148.7	19.669	163.83	153.75	32.846	188.93	361.35	32.779	293.77	370.1	19.669	57.12	39.64	19.668	99.2	32.42
33.952	195.82	119.89	33.946	193.52	252.83	20.364	30.7	23.71	20.369	180.14	50.53	33.943	152.59	187.69	33.95	132.07	185.58	20.367	75.42	181.26	73.52	183.91	20.369	188.21	191.48	34.017	161.42	293.04	33.945	330.36	366.21	20.369	54.15	43.48	20.368	95.9	31.78
35.118	222.91	116.9	35.115	160.12	206.22	21.068	31.28	26.43	21.069	166.9	37.82	35.112	152.03	222.35	35.121	134.4	190.68	21.069	79.82	169.7	71.04	167.68	21.069	257.71	264.54	35.189	157.31	239.62	35.114	289.25	371.39	21.069	54.45	46.02	21.068	99.87	29.94
36.286	202.32	116.67	36.283	185.15	160.9	21.768	36.62	22.05	21.769	160.02	35.47	36.28	146.85	213.48	36.29	145.24	177.79	21.768	68.69	179.48	82.57	168.46	21.768	233.46	259.58	36.359	167.69	257.69	36.283	303.3	370.88	21.768	58.66	44.07	21.768	96.42	31.57
37.454	203.12	125	37.451	215.41	203.1	22.469	30.29	25.4	22.468	150.65	27.5	37.448	148.75	196.12	37.456	144.64	182.16	22.47	73.3	163.65	71.22	160.93	22.468	214.2	224.8	37.531	182.34	210.88	37.451	289.5	347.08	22.468	55.7	44.95	22.468	107.92	25.88
38.623	217.49	128.35	38.619	172.65	180.55	23.168	31.7	27.5	23.168	135.11	30.23	38.616	149.5	238.51	38.625	150.68	166.57	23.167	57.24	155.12	78.88	178.4	23.169	182.98	219.78	38.703	175.01	201.53	38.619	303.64	338.68	23.168	51.22	48.23	23.169	106.41	33.12
39.791	223.32	149.73	39.787	210.23	154.41	23.87	31.69	28.9	23.869	131.52	24.43	39.784	178.94	224.22	39.793	144.78	195.53	23.869	65.39	167.82	69.36	141.77	23.869	114.07	153.43	39.873	407.16	560.64	39.787	289.72	341.17	23.868	53.84	51.94	23.867	101.15	32.62
40.959	197.56	124.88	40.955	180.73	189.26	24.569	29.71	27.17	24.568	116.08	26.64	40.952	151.41	213.68	40.961	137.07	185.45	24.569	71.33	158.99	74.81	149.58	24.568	72.36	117.71	41.046	175.11	451.17	40.955	293.02	356.36	24.569	57.06	43.46	24.569	95.32	28.56
42.127	883.57	473.04	42.123	159.51	165.12	25.269	29.46	28.95	25.269	113.65	31.54	42.121	156.29	260.28	42.129	135.25	181.5	25.27	88.58	152.75	66.76	138.21	25.268	62.76	80.62	42.216	148.75	328.54	42.123	276.64	354.83	25.268	57.2	48.49	25.269	103.1	33.67
43.295	601	562.36	43.289	173.99	182.65	25.969	33.79	28.73	25.969	106.96	25.38	43.289	182.21	237.26	43.297	146.71	188.67	25.97	71.61	161.3	77.97	187.79	25.968	48.38	79.8	43.388	146.26	283.44	43.291	290.04	341.73	25.968	56.05	48.6	25.964	103.13	32.46
44.462	322.05	462.68	44.457	189.62	169.66	26.669	29.41	28.39	26.669	105.76	28.64	44.458	187.33	229.26	44.465	143.38	181.99	26.669	68.93	157.6	69.89	141.89	26.668	47.7	75.26	44.558	141.2	224.58	44.46	276.54	337.08	26.668	53.82	50.32	26.668	109.13	31
45.631	222.53	369.22	45.624	175.4	166.96	27.368	30.98	28.81	27.369	90.02	27.83	45.626	220.82	249.8	45.633	122.49	162.02	27.369	91.01	190.3	81.1	153.49	27.368	43.57	64.29	45.728	343.7	649.38	45.628	284.88	313.44	27.367	55.8	53.53	27.367	102.56	37.86
46.797	206.27	308.2	46.793	189.15	150.12	28.07	34.12	29.4	28.068	91.93	23.95	46.793	247.13	295.46	46.802	127.07	174.5	28.068	314.11	396.43	66.25	153.39	28.068	54.34	64.14	46.9	186.78	514.78	46.796	319.75	439.36	28.067	52.61	59.92	28.069	102.32	29.45
47.965	216.44	225.75	47.961	175.41	165.43	28.769	29.76	32.28	28.768	92.11	24.3	47.961	876.25	786.68	47.969	134.36	193.56	28.769	324.26	478.17	66.35	149.68	28.769	47.21	70.7	48.072	156.38	407.38	47.964	328.58	425.72	28.768	53.24	62.31	28.769	104	32.99
49.133	212.57	215.22	49.128	178.15	162.84	29.47	29.88	32.64	29.469	84.69	24.77	49.129	704.14	849.46	49.137	146.94	182.03	29.469	397.01	633.14	68.51	141.86	29.468	46.43	64.12	49.24	154.13	328.08	49.133	295.78	370.02	29.467	52.27	61.86	29.468	98.52	25.84
50.299	233.12	205.53	50.296	166.75	173.96	30.169	28.93	27.73	30.17	80.54	24.08	50.297	1130.64	862.73	50.305	145.95	206.15	30.169	394.84	676.81	65.69	156.05	30.169	42.15	56.55	50.408	178.09	247.45	50.301	280.93	301.86	30.168	52.01	54.12	30.169	105.89	31.01
51.468	197.55	172.63	51.464	159.06	166.64	30.869	26.84	26.88	30.87	83.49	25.38	51.465	839.33	1045.56	51.473	125.6	201.55	30.869	364.57	695.18	67.79	155.65	30.869	54.07	53.12	51.579	138.19	188.19	51.469	293.71	266.47	30.868	51.27	49	30.867	107.98	30.92
52.636	198.88	134.78	52.632	202.06	230.83	31.569	32.31	28.39	31.568	86.11	26.31	52.633	567.63	976.2	52.64	160.59	197.05	31.569	293.07	647.49	64.29	146.33	31.569	47.82	59.72	52.747	195.92	193.38	52.637	288.82	283.38	31.568	51.46	45.87	31.569	112.67	30.14
53.802	225.28	137.32	53.8	160.66	243.12	32.269	28.55	28.65	32.27	79.34	28.07	53.802	280.91	696.15	53.807	138.51	197.76	32.269	218.11	548.14	74.2	159.37	32.269	50.66	53.36	53.915	156.55	198.61	53.806	303.2	389.64	32.27	57.11	44.45	32.268	107.94	32.68
54.971	222.51	146.95	54.967	154.73	241.63	32.969	30.14	27.88	32.97	74.22	24.77	54.971	219.81	472.59	54.976	145.34	208.35	32.969	158.66	510.02	63.55	152.4	32.969	54.4	54.9	55.083	174.09	200.7	54.974	291.51	315.88	32.968	56.47	44.79	32.968	104.65	30.42
56.138	176.01	143.64	56.136	164.59	211.81	33.669	31.55	26.05	33.67	82.56	19.39	56.138	169.91	361.43	56.145	149.08	208.54	33.67	107.78	485.95	68.45	156.12	33.67	45.48	55.17	56.251	166.02	196.45	56.14	295.43	305.06	33.669	58.13	41.7	33.668	103.6	27.63
57.306	214.9	160.64	57.304	193.26	212.52	34.368	28.09	28.3	34.369	79.78	22.85	57.306	156.33	286.77	57.313	132.29	189.3	34.369	88.56	457.18	72.28	154.75	34.369	45.67	44.25	57.423	178.99	195.99	57.308	289.28	317.69	34.367	58.67	48.15	34.366	101.81	30.49
58.478	235.5	118.92	58.471	162.03	170.37	35.067	28.41	23.11	35.069	76.54	23.64	58.474	195.54	265.97	58.481	279.87	340.82	35.069	74.29	402.91	62.73	146.12	35.07	45.36	55.12	58.594	150.56	186.17	58.476	300.96	323.97	35.069	50.72	39.76	35.067	94.61	28.54
59.646	236.14	124.7	59.639	187.28	186.41	35.768	32.31	31.48	35.77	97.13	43.09	59.642	185.98	269.13	59.649	617.46	763.15	35.77	72.18	361.5	55.08	158.61	35.768	46.85	53.59	59.76	178.27	216.46	59.645	300.93	289.26	35.77	54.53	45.87	35.768	102.76	24.44
60.818	206.48	121.63	60.807	197.55	192.97	36.467	30.19	29.93	36.47	131.7	62.9	60.81	183.5	278.4	60.817	397.85	757.9	36.47	69.5	342.86	68.33	135.12	36.468	55.15	52.59	60.933	185.55	194.76	60.813	291.78	305.91	36.47	55.16	44.5	36.468	187.45	91.43
61.986	844.84	429.01	61.975	157.81	176.36	37.169	32.68	31.48	37.17	154.04	74.6	61.978	188.04	257.18	61.984	162.26	630.14	37.169	76.04	295.82	62.81	112.88	37.168	51.38	52.91	62.101	532.41	799.47	61.98	300.26	292.25	37.168	53.17	49.71	37.168	256.06	118.08
63.153	678.34	462.17	63.143	167.68	145.79	37.865	31.89	39.04	37.868	170.02	82.92	63.147	202.53	260.45	63.151	114.5	515.71	37.869	85.82	283.02	51.27	140.26	37.868	56.47	68.25	63.267	226.05	740.91	63.148	288.54	317.32	37.868	56.41	41.15	37.868	297.11	132.1
64.321	297.22	419.19	64.31	218.93	136.55	38.567	32.54	38.34	38.57	185.94	79.76	64.319	193.26	244.26	64.319	103.29	458.44	38.57	90.54	245.58	66.38	150.19	38.568	44.62	60.96	64.439	180.63	604.35	64.316	284.23	338.12	38.568	57.95	48.28	38.566	345.12	124.03
65.49	234.35	351.52	65.478	173.82	164.73	39.268	30.46	32.51	39.268	200.31	74.71	65.488	166.32	223.74	65.486	134.78	380.86	39.269	71.36	242.07	76.24	146.11	39.269	44.98	56.58	65.606	174.49	469.06	65.484	279.79	357.96	39.27	51.72	47.65	39.267	347.5	140.58
66.656	241.13	320.05	66.646	177.16	175.22	39.97	31.19	34.24	39.969	194.64	80.37	66.656	188.77	208.33	66.654	122.52	320.83	39.968	71.35	235.91	54.39	130.14	39.968	62.67	64.06	66.778	158.64	358.02	66.652	277.24	377.43	39.969	52.55	63.43	39.968	359.95	122.7
67.824	272.77	354.59	67.814	196.93	157.07	40.669	30.83	30.48	40.668	189.53	70.13	67.824	184.7	192.6	67.824	110.34	256.4	40.668	72.38	226.09	60.27	120.89	40.667	44.1	65.04	67.946	171.11	366.16	67.819	301.08	370.11	40.67	56.98	58.64	40.668	370.72	121.99
68.99	743.48	454.84	68.982	185.01	188.38	41.369	30.88	32.88	41.369	176.86	50.77	68.992	198.4	190.85	68.992	111.73	255.34	41.368	84.58	255.12	60.73	142.51	41.369	44.4	70.26	69.114	175.76	282.21	68.987	280.37	349.34	41.371	56.14	64.72	41.368	379.17	115.16
70.158	378.47	416.78	70.15	188.96	189.13	42.069	32.96	28.43	42.069	169.73	44.3	70.162	177.64	229.1	70.16	164.41	224.4	42.068	81.63	264.5	71.94	148.4	42.067	41	56.28	70.282	172.18	241.73	70.155	271.5	351.91	42.071	53.36	63.76	42.07	357.17	93.77
71.326	267.13	328.84	71.318	177.33	182.74	42.768	32.08	28.27	42.769	141.99	35.15	71.33	236.82	239.98	71.328	141.13	162.82	42.769	70.93	238.97	67.44	139.16	42.769	44.13	57.38	71.45	198.92	211.24	71.322	598.98	1139.06	42.769	56.28	60.56	42.768	329.06	58.32
72.493	211.53	259.36	72.486	183.29	186.21	43.468	30.85	30.42	43.469	140.29	32.25	72.497	238.5	226.82	72.495	138.68	169.09	43.467	60.47	230.08	63.34	137.35	43.467	36.83	66.51	72.618	160.88	184.6	72.49	601.69	1066.97	43.469	53.52	55.21	43.47	305.2	49.42
73.662	223.27	237.74	73.653	173.57	170.28	44.168	34.07	25.19	44.169	133.89	30.33	73.665	288.5	198.44	73.663	151.26	162.4	44.168	65.93	223	63.04	133.67	44.168	47.47	55.9	73.787	512.98	752.99	73.658	590.12	1143.47	44.169	58.37	54.66	44.17	265.11	43.93
74.829	219.12	197.54	74.821	203.37	149.88	44.864	30.1	27.91	44.87	122.47	30.29	74.833	294.55	187.44	74.83	140.38	180.43	44.87	62.28	208.79	63.87	132.11	44.869	95.15	115.61	74.954	201.33	672.73	74.826	530.66	1025.34	44.868	55.02	53.75	44.868	227.07	34.68
75.997	229.41	181.05	75.99	163.6	172.17	45.568	29.47	27.61	45.568	112.13	28.23	76.001	261.49	206.41	75.998	124.91	172.18	45.568	68.32	201.47	61.47	125	45.568	166.83	161.9	76.123	166.48	520.94	75.994	445.48	632.31	45.569	50.22	52.35	45.568	209.01	34.79
77.165	214.28	145.81	77.158	155.26	167.22	46.269	30.44	24.83	46.269	91.1	28.7	77.171	251.61	209.65	77.166	117.09	171.7	46.27	94.39	239.86	67.33	147.74	46.267	231.34	245.7	77.292	168.6	448.37	77.161	379.42	388.63	46.27	53.86	45.5	46.268	184.69	32.07
78.331	196.26	116.58	78.326	181.49	153.22	46.968	30.55	28.39	46.969	101.63	27.08	78.339	254.53	233.68	78.335	108.19	151.69	46.968	108.01	235.56	63.48	131.46	46.969	225.76	251.39	78.458	159.23	353.3	78.327	325.36	315.29	46.969	53.73	49.6	46.97	163.54	35.31
79.499	214.66	135.54	79.492	170.08	184.18	47.67	31.4	28.45	47.669	90.36	25.59	79.507	246.77	213.51	79.503	135.17	142.5	47.67	86.56	220.65	62.39	151.74	47.669	259.76	257.84	79.626	179.55	290.83	79.496	324.4	317.56	47.669	52.96	39.35	47.668	136.87	30.75
80.666	237.88	140.95	80.66	183.07	159.41	48.368	27.65	28.85	48.369	80.95	28.63	80.675	246.33	217.39	80.671	120.94	161.92	48.368	75.91	214.72	56.49	131.04	48.369	230.3	260.49	80.794	196.93	213.19	80.664	308.99	302.02	48.369	50.42	51.18	48.368	120.91	35.07
81.833	213.74	137.5	81.828	168.8	177.77	49.07	28.93	26.24	49.069	88.66	27.47	81.843	234.85	225.41	81.839	123.4	165.75	49.069	70.09	215.73	66.01	140.11	49.069	150.64	209.48	81.96	159.23	215.42	81.83	280.46	267.46	49.07	52.44	48.99	49.07	118.21	32.04
83.001	193.64	123.02	82.996	176.79	161.44	49.769	31.4	27.05	49.769	83.64	25.29	83.012	212.05	204.43	83.008	158.99	163.42	49.769	62.2	210.5	75.13	149.3	49.768	90.33	138.09	83.128	180.86	152.84	82.998	298.79	251	49.769	56.17	42.69	49.769	117.76	34.47
84.168	202.84	119.68	84.164	181.32	173.24	50.469	30.5	26.61	50.469	81.47	26.18	84.18	192.43	237.59	84.174	134.71	167.49	50.468	72.96	206.62	80.94	132.77	50.468	72.57	96.07	84.296	170.72	188.4	84.167	301.58	213.96	50.469	52.34	48.75	50.469	107.37	35.6
85.336	216.37	104.6	85.331	177.48	170.63	51.17	30.59	29.35	51.168	76.18	29.29	85.348	227.8	223.25	85.342	128.58	178.06	51.17	80.52	189.88	74.19	151.3	51.169	42.62	104.13	85.464	161.78	176.39	85.335	289.06	238.26	51.17	53.96	49.04	51.17	103.24	35.44
86.504	897.36	398.12	86.499	159.47	173.78	51.863	28.32	26.06	51.869	80.69	30.54	86.516	175.28	212.34	86.51	126.24	169.19	51.868	73.4	187.71	67.66	165.54	51.868	51.65	79.45	86.633	170.84	188.01	86.503	280.49	291.34	51.87	45.87	45.47	51.868	101.17	30.75
87.672	684.93	422.21	87.667	165.1	174.4	52.569	29	26.84	52.569	75.41	28.96	87.684	198.52	197.14	87.678	128.56	155.18	52.568	63.66	186.31	64.27	150.93	52.568	55.76	76.36	87.801	160.53	185.64	87.671	281.73	270.68	52.569	51.84	46.27	52.57	105.78	33.43
88.84	318.83	370.27	88.835	153.24	147.27	53.269	31.25	30.45	53.268	78.36	25.4	88.852	239.16	205.81	88.846	147.23	175.37	53.267	72.46	195.32	73.37	136.02	53.268	47.25	67.19	88.969	191.43	208.15	88.84	293.67	293.94	53.269	51.37	45.64	53.27	91.19	36.23
90.008	235.74	244.77	90.003	159.85	171.92	53.969	27.82	27.49	53.969	70.66	23.82	90.018	270.91	212.8	90.014	453.62	446.98	53.969	71.47	193.35	63.11	122.11	53.97	44.55	53.75	90.137	150.18	200.26	90.008	270.81	282.72	53.969	51.11	50.47	53.968	96.41	36.12
91.176	249.57	227.76	91.172	162.11	186.27	54.669	33.49	26.5	54.669	79.23	28.05	91.186	245.39	222.51	91.181	453.85	634.38	54.668	68.81	192.27	58.38	124.82	54.668	46.44	64.48	91.305	165.94	187.65	91.176	284.6	262.5	54.671	51.07	47.05	54.668	104.37	33.4
92.345	225.88	163.79	92.339	176.64	165.7	55.363	29.89	27.93	55.369	74.01	26.36	92.355	258.84	248.32	92.349	260.82	508.82	55.37	85.54	208.43	59.89	147.18	55.368	52.29	74.52	92.473	204.79	468.04	92.344	287.47	248.74	55.369	52.16	40.74	55.368	96.7	37.08
93.513	206.62	153.66	93.507	187.37	162.29	56.068	26.78	31.45	56.069	74.22	27.81	93.523	278.89	229.4	93.516	145.06	431.44	56.069	78.24	185.42	57.37	148.39	56.069	41	67.49	93.641	447.25	635.69	93.51	286.62	268.64	56.07	55.52	42.49	56.069	102.76	32.88
94.681	235.85	252.03	94.674	155.31	148.1	56.767	32.49	28.45	56.77	70.46	21.42	94.691	228.51	215.92	94.684	128.11	386.53	56.769	86.36	191.45	64.22	158.96	56.768	42.56	56.75	94.81	193.98	560.55	94.678	297.11	253.96	56.769	55.31	46.69	56.769	93.9	27.76
95.849	874.83	480.86	95.842	171.42	184.37	57.467	33.29	31.92	57.469	69.89	26.47	95.859	226.41	202.73	95.852	108.74	332.13	57.469	70.07	201.5	61.69	170.82	57.467	47.46	57.16	95.978	176.38	460.89	95.845	254.02	259.73	57.469	55.33	42.04	57.467	96.01	33.33
97.017	420.55	373.61	97.01	173.04	144.43	58.168	31.11	28.51	58.169	76.67	28.02	97.025	269.5	203.37	97.021	130.56	316.65	58.168	75.74	200.58	51.87	144	58.167	43.22	58.54	97.146	185.73	382.1	97.013	300.15	269.69	58.169	52.57	38.2	58.167	98.46	27.16
98.185	301.32	318.85	98.178	136.44	170.76	58.868	27.86	29.85	58.869	74.72	26.55	98.193	267.65	226.91	98.189	119.71	283.54	58.87	267.15	322.26	55.25	146.23	58.867	50.96	57.43	98.314	148.19	376.11	98.182	287.47	248.54	58.869	51.05	42.3	58.869	98.3	34.4
99.353	230.43	228.06	99.346	158.37	151.55	59.568	31.39	41.08	59.569	77.27	25.39	99.359	201.12	216.99	99.357	114.81	229.59	59.569	278.8	444.68	56.12	136.75	59.568	49.47	68.61	99.48	339.09	707.94	99.349	290.29	259.43	59.57	54.71	39.48	59.569	94.64	30.26
100.519	232.11	211.05	100.514	171	172.97	60.27	50.07	127.68	60.269	73.14	28.85	100.528	189.56	218.13	100.524	152.46	244.87	60.268	236.45	439.58	57.66	134.32	60.269	45.98	56.93	100.648	247.01	669.65	100.517	267.64	282.12	60.269	53.42	46.73	60.268	93	34.95
101.687	230.52	167.07	101.682	187.91	189.57	60.968	60.16	166.38	60.968	79.56	26.78	101.696	187.18	234.35	101.693	135.3	215.24	60.967	405.59	560.7	51.73	140.37	60.968	54.12	57.29	101.816	199.74	548.08	101.685	277.77	265.32	60.97	55.24	41.2	60.969	101.19	27.24
102.853	235.59	154.32	102.851	170.55	171.86	61.67	68.89	211.24	61.668	80.27	26.6	102.864	166.67	207.6	102.861	130.62	187.88	61.669	289.39	573.83	64.26	133.49	61.668	51.29	61.81	102.983	166.55	451.17	102.853	268.3	274.49	61.67	52.85	44.81	61.668	99.06	29.05
104.021	216.89	133.06	104.018	189.26	194.7	62.365	75.57	225.44	62.367	73.16	25.12	104.032	217.84	216.2	104.029	125.76	174.86	62.367	183.42	455.03	61.01	109.96	62.368	47.03	56.43	104.152	167.88	349.49	104.021	286.93	259.34	62.37	50.42	40.64	62.368	94.87	31.38
105.19	229.67	123.85	105.186	175.64	189.2	63.068	76.56	235.14	63.068	77.17	25.06	105.2	206.12	245	105.197	135.63	179.13	63.067	120.01	420.13	64.06	126.19	63.068	46.33	57.41	105.319	165.55	436.03	105.189	280.23	246.73	63.069	50.95	46.1	63.07	87.43	30.86
106.357	231.98	118.59	106.354	147	161.84	63.769	90.86	231.88	63.768	75.6	27.4	106.368	700.85	673.87	106.366	120.68	183.92	63.767	98.07	416.58	53.27	135.07	63.768	49.99	57.99	106.486	528.22	737.57	106.356	274.49	274.03	63.769	55.21	45.64	63.768	101.17	27.86
107.525	870.64	375.24	107.522	167.34	176.93	64.47	77.38	214.23	64.468	71.14	25.07	107.537	704.53	717.72	107.535	551.76	480.75	64.469	86.2	416.9	59.44	140.75	64.468	40.21	66.43	107.654	206.9	728.74	107.525	276.71	289.18	64.467	57.92	43.91	64.47	95	33.08
108.693	599.15	421.98	108.69	173.16	153.95	65.17	61.65	175.73	65.168	73.17	26.79	108.705	473.62	910.37	108.703	424.28	555.85	65.167	85.85	385.8	56.12	124.18	65.168	47.54	47.48	108.822	136.08	573.46	108.694	269.56	276.54	65.169	50.23	45.19	65.169	94.43	29.77
109.861	275.33	349.98	109.858	182.06	173.19	65.868	55.03	141.51	65.868	81.35	27.56	109.873	354.79	806.04	109.87	475.59	624.24	65.869	72.62	381.61	50.87	136.79	65.87	45.67	44.97	109.99	172.08	594.96	109.862	292.51	334.49	65.868	51.25	45.55	65.867	98.13	31.42
111.029	238.74	251.05	111.025	178.31	191.27	66.57	41.15	125.39	66.568	74.54	25.08	111.041	249.02	614.97	111.039	359.65	556.23	66.568	85.12	358.13	59.2	118.14	66.57	44.28	62.59	111.158	154.2	479.64	111.032	255.83	342.95	66.57	53.61	47.84	66.568	94.53	31.34
112.197	184.4	206.52	112.193	169.57	179.94	67.269	35.46	99.06	67.269	80.57	26.47	112.209	184.23	523.19	112.207	170.56	396.38	67.268	80.68	324.59	62.34	141.79	67.27	46.81	61.25	112.326	177.32	395.93	112.2	263.85	293.51	67.269	55.7	47.32	67.269	86.62	29.77
113.365	230.44	202.28	113.361	179.15	184.07	67.97	38.32	89.97	67.969	85.28	25.36	113.377	170.93	416.68	113.375	125.58	353.23	67.968	76.5	300.65	52.97	132.3	67.969	43.09	63.28	113.495	155.6	296.76	113.368	285.03	284.88	67.968	49.65	45.36	67.97	97.86	27.55
114.534	197.01	198.55	114.529	165.44	242.76	68.67	29.71	71.84	68.67	77.44	26.88	114.545	186.66	367.57	114.543	113.76	300.67	68.669	81.39	308.81	53.17	115.82	68.669	52.48	49.74	114.662	166.89	287.51	114.534	279.15	276.97	68.669	52.68	44.35	68.668	94.03	31.96
115.701	214.15	177.56	115.697	149.23	256.21	69.368	33.35	64.58	69.368	73.36	26.05	115.711	168.4	335.89	115.711	139.34	247.47	69.368	97.8	294.95	57.19	134.67	69.369	38.51	55	115.83	161.38	214.81	115.703	272.84	293.08	69.369	47.66	48.02	69.368	87.88	35.03
116.87	211.69	128.45	116.864	170.82	227.42	70.07	30.39	46.48	70.07	72.96	30.33	116.88	193.29	340.2	116.88	126.19	236.24	70.07	87.07	299.28	55.47	148.3	70.069	41.92	39.23	116.998	161.53	190.63	116.872	285.81	318.43	70.069	52.57	40.29	70.069	95.67	27.87
118.036	377.85	290.09	118.032	176.99	257.73	70.769	31.5	49.2	70.768	76.03	24.61	118.048	271.45	304.03	118.047	127.81	215.69	70.769	86.66	261.55	63.21	142.35	70.77	46.61	54.17	118.166	165.18	193.72	118.04	280.56	299.39	70.769	46.91	47.7	70.77	98.09	27.27
119.204	841.46	401.48	119.2	183.87	240.39	71.469	30.67	42.94	71.468	107.3	49.06	119.216	283.43	292.37	119.213	148.36	218.8	71.468	89.49	252.96	52.64	124.3	71.47	50.21	50.54	119.334	173.6	195.21	119.208	508.43	851.44	71.469	57.21	52.2	71.468	96.36	27.71
120.372	366.88	321.13	120.367	131.13	232.92	72.17	36.53	43.51	72.17	137.67	70.94	120.384	264.83	306.8	120.381	123.77	222.22	72.169	79.42	254.33	49.62	131.7	72.169	49.82	61.1	120.503	188.37	187.65	120.376	545.88	1001.83	72.168	51.69	53.08	72.169	100.25	22.32
121.54	218.98	247.35	121.536	171.82	213.49	72.865	34.23	40.27	72.869	166.76	78.42	121.55	249.48	275.2	121.549	146.28	183.25	72.869	76.15	243.22	60.88	128.77	72.87	38.61	52.61	121.671	281.87	506.3	121.544	593.89	1164.79	72.869	52.66	58.16	72.867	103.58	27.1
122.708	229.03	184.01	122.704	166.66	217.32	73.57	31.26	30.43	73.568	177.09	74.6	122.718	227.12	258.14	122.717	143.45	193.72	73.569	74.28	244.53	61.45	136.86	73.569	35.81	55.62	122.84	300.56	508.58	122.712	557.21	946.33	73.568	49.66	58.29	73.57	97.71	30.99
123.876	214.56	187.12	123.872	158.46	177.24	74.27	29.31	32.3	74.268	167.27	70.05	123.886	232.08	306.35	123.885	128.97	179.68	74.27	75.15	252.99	56.54	142.79	74.269	44.63	48.72	124.007	171.26	501.69	123.88	434.23	702.42	74.27	51.62	65.03	74.268	100.01	29.4
125.044	215.62	206.18	125.041	172.6	191.12	74.97	33.01	30.97	74.97	165.91	76.18	125.053	242.01	306.04	125.052	154.19	194.48	74.97	69.49	216.97	56	154.14	74.969	45.09	61.93	125.173	158.53	456.08	125.048	399.8	447.92	74.97	50.67	61.61	74.967	95.65	28.16
126.213	228.03	153.8	126.208	154.26	195.73	75.67	32.76	31.52	75.668	186.85	76.06	126.223	289.26	305.06	126.22	136.83	156.33	75.669	67.36	223.1	58.33	145.26	75.669	55.66	58.19	126.341	175	338.9	126.217	306.33	377.1	75.669	49.44	62.53	75.669	92.25	33.11
127.381	234.9	128.06	127.376	150.95	191.26	76.371	28.79	30.9	76.369	190.11	65.02	127.39	233.6	328.96	127.387	143.79	162.51	76.371	103.26	262.02	51.64	127.05	76.369	38.83	53.93	127.509	174.23	332.25	127.385	327.97	355.5	76.369	48.15	61.83	76.367	95.08	25.99
128.55	190.89	136.24	128.542	162.28	209.32	77.069	32.62	29.7	77.069	187.88	56.88	128.558	203.59	294.44	128.553	160.44	195.98	77.068	149.76	282.04	53.65	144.51	77.069	58.54	53.83	128.677	351.41	656.36	128.553	312.03	329.49	77.071	52.84	57.24	77.067	90.73	28.47
129.718	652.39	366.4	129.71	163.22	174.8	77.769	30.64	29.62	77.77	178.71	40.2	129.726	181.18	259.63	129.721	150.48	194.64	77.771	107.91	260.53	42.71	114.58	77.769	44.87	58.86	129.849	200.22	547.7	129.721	297.65	293.38	77.769	52.79	64.13	77.768	101.14	31.48
130.886	634.17	464.26	130.879	152.8	177.47	78.469	32.86	33.55	78.469	159.35	33.39	130.894	239.82	303.41	130.889	158.9	177.1	78.469	73.26	253.22	43.52	146.16	78.469	38.78	49.8	131.017	184.77	407.35	130.889	317	257.88	78.469	58.12	70.08	78.469	88.97	27.66
132.054	302.75	378.77	132.045	167.18	168.1	79.169	34.02	34.03	79.168	138.89	33.09	132.062	207.78	276.1	132.057	420.38	443.68	79.171	67.82	240.16	56.33	129.68	79.169	43.98	52.71	132.188	187.44	307.19	132.057	281.72	272.15	79.17	48.77	64.47	79.167	97.14	30.6
133.222	233.72	301.58	133.213	173.59	182.9	79.869	32.72	36.31	79.868	128.8	31.68	133.23	179.84	278.61	133.225	475.99	632.99	79.869	61.08	235.28	56.42	134.63	79.869	36.18	56.29	133.358	142.82	240.71	133.223	300.21	242.83	79.87	52.32	59.27	79.867	90.44	32.69
134.389	196.05	228.19	134.382	164.46	176.09	80.569	51.81	127.58	80.569	126.33	32.54	134.398	202.31	254.09	134.391	250.56	471.32	80.57	63.9	249.81	52.2	146.28	80.569	41.84	53.14	134.527	152.31	211.02	134.392	279.44	235.81	80.57	53.36	60.21	80.567	96.94	25.03
135.558	204.12	182.67	135.55	168.91	194.12	81.269	68.19	159.66	81.268	117.12	29.73	135.567	342.4	396.68	135.56	167.34	396.94	81.269	82.94	215.88	54.1	163.6	81.268	40.24	56.41	135.699	171.46	201.1	135.561	273.9	245.53	81.269	50.49	50.66	81.268	88.63	30.42
136.725	201.58	175.53	136.719	137.67	195.55	81.969	58.53	158.91	81.969	86.56	26.46	136.734	860.78	778.55	136.727	112.95	317.86	81.968	87.3	219.57	57.69	147.68	81.968	41.87	53.19	136.867	143.07	181.26	136.727	283.69	238.19	81.969	51.95	60.63	81.968	92.8	29.87
137.891	236.97	165.81	137.887	171.75	168.82	82.669	58.35	134.56	82.669	89.56	26.7	137.901	684.53	839.72	137.896	133.22	272.4	82.669	75.88	221.07	52.38	147.77	82.667	44.43	55.61	138.04	164.23	182.36	137.895	272.8	231.2	82.669	50.13	52.18	82.67	84.16	23.94
139.059	240.07	132.5	139.054	157.99	168.55	83.364	49.98	103.62	83.368	93.46	27.34	139.069	1171.62	910.43	139.064	111.53	286.3	83.368	88.06	221.97	108.25	211.05	83.368	46.53	54.78	139.21	162.55	182.79	139.063	264.9	271.77	83.369	51.87	50.75	83.368	86.01	28.88
140.227	786.05	375.09	140.222	150.87	162.69	84.069	40.54	79.53	84.069	86.99	24.87	140.235	937.79	1003.8	140.233	124.4	219.34	84.068	85.07	213.16	361.73	356	84.069	39.34	54.71	140.382	171.39	206.29	140.23	282.36	225.97	84.07	53.09	57.29	84.069	87.83	28.52
141.395	618.11	428.05	141.39	137.18	170.54	84.769	37.06	60.52	84.768	85.24	24.69	141.403	458.95	1016.73	141.401	128.63	207.09	84.768	76.82	186.8	330.31	425.91	84.769	40.96	60.71	141.549	160.04	183.83	141.398	286.5	253.77	84.768	54.56	53.52	84.769	90.38	27.44
142.563	289.2	320.52	142.558	166.76	181.74	85.469	32.99	52.03	85.468	82.93	26.5	142.569	281.24	746.53	142.569	119.08	201.07	85.47	65.79	202.8	256.35	496.35	85.467	49.61	55.62	142.72	169.35	180.67	142.568	268.41	357.97	85.468	51	54.04	85.469	88.17	29.3
143.731	255.83	242.24	143.726	193.22	178.37	86.169	36.43	49.31	86.17	85.73	28.45	143.738	200.85	587.96	143.736	391.49	349.44	86.168	62.74	177.31	223.36	559.09	86.167	41.02	53.77	143.89	163.27	172.83	143.737	263.65	306.59	86.17	56.39	52.23	86.168	89.48	26.13
144.9	203.71	214.47	144.892	154.62	168.43	86.868	32.32	46.06	86.869	88.75	25.39	144.907	178.05	496.39	144.904	485.75	630.77	86.87	74.67	177.26	119.76	483.68	86.869	44.13	52.2	145.058	467.58	716.13	144.905	263.22	256.94	86.868	44.82	46.18	86.868	93.31	29.14
146.067	232.72	147.33	146.061	178.18	155.21	87.57	30.89	35.85	87.569	75.65	28.99	146.074	220.17	416.3	146.073	292.56	473.62	87.569	81.09	193.95	78.02	401.49	87.569	50.92	55.07	146.23	247.1	690.62	146.073	273.03	282.43	87.568	48.75	51.08	87.567	154.27	76.97
147.235	205.29	160.47	147.228	177.51	171.2	88.268	36.6	36.02	88.27	79.39	25.87	147.242	187.67	386.79	147.242	371.42	593.34	88.27	75.72	202.58	73.34	302.86	88.27	44.07	58.06	147.4	185.79	615.02	147.241	277.74	249.7	88.268	53.61	48.07	88.268	215.77	121.01
148.403	377.62	289.9	148.396	181.67	178.67	88.97	32.92	35.28	88.969	81.69	24.82	148.41	176.65	383.69	148.41	177.24	407.51	88.97	60.03	202.62	54.89	234.65	88.968	42.74	51.52	148.572	170.77	487.11	148.41	261.85	276.86	88.969	54.87	46.12	88.969	261.14	116.81
149.569	723.87	406.86	149.564	184.94	187.45	89.669	30.05	33.12	89.67	85.56	23.12	149.576	179.87	293.91	149.578	135.88	324.03	89.67	74.45	220.48	58.19	210.32	89.669	49.02	59.75	149.743	166.07	428.84	149.577	265.14	274.18	89.668	52.23	43.69	89.668	290.82	141.5
150.737	283.87	269.75	150.732	165.4	187.96	90.365	32.24	30.04	90.37	83.49	26.63	150.744	178.99	280.49	150.746	138.18	286.19	90.368	87.64	230.87	58.01	164.32	90.369	54.06	52.61	150.916	167.55	352.43	150.746	265.56	291.95	90.369	55.86	47.97	90.367	307.67	126.74
151.905	233.49	218.01	151.9	153.26	175.46	91.069	33.04	28.11	91.07	84.23	31.5	151.912	215.1	324.09	151.914	146.07	249.77	91.07	92.67	212.73	57.97	165.93	91.069	43.17	53.29	152.084	237.03	518.29	151.914	274.43	240.63	91.069	53.99	51.36	91.069	351.07	145.06
153.072	224.99	174.4	153.068	188	177.69	91.769	30.36	29.44	91.77	78.1	24.31	153.081	253.74	309.01	153.08	122.62	219.58	91.77	82.12	205.87	57.36	150.4	91.768	47.65	51.62	153.252	359.57	614.63	153.082	225.6	239.4	91.768	52.93	49.66	91.769	357.89	133.34
154.241	209.1	133.6	154.235	175.53	153.61	92.469	31.43	29.03	92.47	82.43	25.16	154.25	216.5	284.81	154.249	122.26	204.39	92.47	64.49	227.6	50.31	137.7	92.468	44.46	66.59	154.42	145.21	529.81	154.25	251.68	236.19	92.468	58.37	52.02	92.469	367.52	112.14
155.41	207.02	138.22	155.404	156.54	187.78	93.169	29.08	26.35	93.168	108.01	41.73	155.417	213.75	259.44	155.416	119.21	189.34	93.169	63.72	204.35	56.44	153.7	93.169	51.99	54.87	155.592	150.18	403.31	155.418	267.81	250.32	93.168	56.36	45.87	93.17	379.78	123.14
156.577	218.42	119.8	156.571	148.41	149.71	93.868	26.39	25.3	93.869	141.56	68.36	156.585	223.93	276.57	156.585	129.6	175.01	93.87	65.57	192.86	59.28	146.6	93.869	47.08	64.35	156.763	174.51	310.99	156.586	256.42	266.49	93.869	57.34	49.01	93.868	349.68	96.66
157.745	196.47	117.63	157.738	153.04	161.3	94.569	32.14	27.71	94.57	160.72	66.05	157.753	198.3	282.25	157.753	139.42	165.2	94.57	69.55	185.4	54.19	155.56	94.568	39.43	49.23	157.934	173.94	230.66	157.754	255.93	226.02	94.568	52.64	45.32	94.569	353.94	70.32
158.913	199.99	114.08	158.908	163.84	163.37	95.268	33.09	25.05	95.269	181.43	69.23	158.921	174.42	302	158.921	151.06	169.27	95.268	71.64	206.83	58.13	153.61	95.269	47.31	62.04	159.107	149.32	223.02	158.921	257.86	236.1	95.27	51.71	43.11	95.268	311.69	59.83
160.081	217.53	127.16	160.076	152.46	178.55	95.97	29.91	22.02	95.97	200.63	70.47	160.089	197.41	261.72	160.089	152.88	146.26	95.968	72.36	195.9	52.56	134.89	95.969	40.67	57.19	160.274	168.47	225.9	160.09	292.31	229.99	95.969	53	42.87	95.97	273.97	39.16
161.247	244.15	109.57	161.248	177.23	163.14	96.67	33.54	29.06	96.67	202.99	77.33	161.257	180.81	250.84	161.257	143.23	145.99	96.669	78.01	198.97	52.17	152.68	96.669	36.87	59.23	161.44	175.87	207.65	161.256	282.05	264.05	96.669	55.37	49.03	96.668	284.28	39.4
162.415	232.62	109.62	162.418	175.88	186.38	97.365	32.37	39.41	97.371	193.87	74.5	162.425	178.43	210.45	162.425	146.04	154.11	97.369	67.45	221.36	54.25	132.67	97.369	44.98	46.58	162.608	261.32	596.24	162.424	251.39	289.39	97.367	53.89	45.92	97.368	302.3	67.68
163.584	220.94	100.38	163.591	182.6	198.5	98.067	53.07	133.03	98.069	190.33	62.89	163.593	179.87	219.63	163.593	159.22	166.32	98.07	68.06	210.51	53.21	152.84	98.069	48.22	57.9	163.776	392.52	663.1	163.592	273.57	299.45	98.069	58.3	45.58	98.068	307.19	103.34
164.751	225.22	130.21	164.759	169.28	182.07	98.768	68.81	154.05	98.77	177.89	47.22	164.76	243.46	270.31	164.761	143.82	169.71	98.77	66.28	229.17	40.98	135.35	98.768	45.29	50.26	164.944	146.58	536.76	164.76	244.28	283.04	98.77	55.46	50.63	98.768	295.47	95.61
165.919	229.47	104.81	165.928	166.57	185.23	99.468	71.96	165.1	99.469	167.6	30.02	165.928	182.94	226.46	165.928	161.94	183.73	99.469	56.38	234.12	50.08	138.47	99.468	36.07	48.84	166.113	198.82	426.64	165.928	249.76	278.55	99.469	52.49	46.13	99.467	281.09	84.1
167.088	236.03	113.12	167.095	172.71	154.55	100.169	67.43	182.55	100.17	156.09	28.91	167.096	185.36	249.66	167.096	478.78	384.24	100.171	57.78	253.02	50.74	136.67	100.167	37.92	49.51	167.281	149.96	282.57	167.096	272.42	312.81	100.17	52.2	51.49	100.168	245.44	54.01
168.256	207.83	109.16	168.265	195.41	161.89	100.869	63.38	156.97	100.869	146.86	29.77	168.264	163.98	237.48	168.264	451.39	656.67	100.869	64.94	248.35	60	143.21	100.869	41.81	50.71	168.449	198.23	253.57	168.262	571.16	1024.29	100.868	50.24	49.55	100.867	230.2	44.56
169.424	224.07	110.13	169.433	181.27	269.12	101.569	51.41	126.9	101.569	130.7	24.36	169.432	216.42	245.97	169.432	220.53	431.2	101.571	77.68	258.91	57.63	124.88	101.569	33.35	53.81	169.617	164.6	232.15	169.431	596.16	909.8	101.57	76.86	103.21	101.569	204.71	31.24
170.592	227.25	185.66	170.601	1343.16	1073.04	102.269	40.3	100.04	102.269	125.88	26.5	170.6	192.55	227.64	170.6	133.74	368.23	102.27	84.72	256.36	61.04	156.49	102.269	47.75	53.12	170.785	153.07	214.28	170.598	456.44	816.16	102.268	156.49	190.4	102.266	196.4	32.53
171.758	867.54	485.21	171.773	1213.37	1016.07	102.967	35.61	81.61	102.969	119.37	26.9	171.768	197.71	264.99	171.768	126.71	309.45	102.97	86.52	249	55.63	147.95	102.969	50.12	58.09	171.953	175.52	187.56	171.767	608.05	1046.76	102.968	167.68	210.47	102.968	147.71	30.49
172.927	532.5	545.53	172.941	1142.02	1113.9	103.669	33.05	69.08	103.669	110.04	26.84	172.937	190.8	224.97	172.937	121.11	261.04	103.668	78.65	236.84	62.85	146.58	103.668	42.3	54.59	173.121	182.13	163.54	172.935	517.32	615.34	103.67	187.62	199.02	103.67	157.19	32.45
174.094	285.33	421.11	174.113	794.11	1190.97	104.369	34.77	54.82	104.369	97.8	31.44	174.103	244.25	263.64	174.103	159.4	257.29	104.367	76.19	255.65	52.13	141.37	104.368	34.63	57.54	174.289	180.26	148.21	174.101	458.55	363.08	104.37	171.94	198.36	104.368	128.38	35.19
175.262	242.58	326.09	175.285	370.09	1089.24	105.069	32.89	48.32	105.069	98.11	25.67	175.271	265.45	227.08	175.271	566.09	602.1	105.067	88.39	250.64	73.03	152.33	105.069	52	63.23	175.458	163	193.37	175.271	391.5	288.95	105.07	154.55	178.6	105.068	122.83	34.31
176.431	232.72	272.94	176.455	213.26	826.72	105.769	30.94	40.88	105.769	94.47	26.59	176.439	250.01	236.46	176.439	338.08	437.5	105.767	101.58	267.45	52.48	143.56	105.768	42.3	46.46	176.624	483.43	618	176.439	410.41	230.3	105.769	126.11	173.71	105.766	114.53	33.27
177.598	190.08	257.06	177.623	193.64	384.03	106.469	33.57	33.96	106.47	84.89	26.48	177.607	185.5	239.12	177.605	160.68	303.94	106.467	304.42	464.56	57.64	138.12	106.468	45.92	64.64	177.793	226.2	572.66	177.605	373.99	214.34	106.47	93.91	147.17	106.468	121.96	31.11
178.766	217.78	192.96	178.791	160.67	249.53	107.169	34.65	32.64	107.169	78.27	27.13	178.78	183.9	237.29	178.774	118.1	245.23	107.167	335.19	558.16	60.48	147.44	107.168	35.71	62.96	178.959	155.16	484.08	178.773	334.74	199.45	107.169	65.03	113.55	107.169	112.62	32.03
179.934	213.56	163.57	179.959	167.8	215.88	107.865	30.42	32.85	107.869	78.16	26.45	179.95	193.69	198.29	179.942	169.48	262.67	107.869	377.13	671.39	58.78	141.93	107.868	46.73	55.1	180.125	183.68	450.29	179.94	297.42	235.63	107.868	67.2	100.39	107.869	110.18	39.78
181.102	414.12	284.81	181.127	168.87	204.95	108.567	30.78	23.47	108.567	84.41	28.93	181.119	223.6	218.04	181.108	133.82	215.02	108.568	351.21	678.19	50.2	120.42	108.568	38.99	54.35	181.293	168.66	386.46	181.109	317.25	228.2	108.569	63.11	75.55	108.568	114.33	29.74
182.271	671.87	400.02	182.295	164.38	178.07	109.269	33.13	27.03	109.268	78.08	32.65	182.287	230.07	246.74	182.276	122.71	184.08	109.268	353.82	793.82	49.82	143.58	109.268	40.63	49.71	182.461	178.59	319.9	182.277	330.78	216.66	109.269	55.39	57.17	109.268	108.47	29.73
183.438	355.84	329.95	183.464	154.28	196.18	109.969	35.2	24.73	109.969	74.69	26.87	183.455	203.9	219.35	183.443	162.44	179.05	109.969	281.64	707.71	59.18	128.12	109.968	49.27	46.49	183.629	157.57	267.27	183.445	326.16	195.64	109.968	52.73	51.29	109.97	118.79	28.47
184.606	246.21	232.77	184.633	167.42	152.13	110.669	34.52	26.11	110.67	88.64	23.34	184.623	182.71	225.31	184.611	153.11	173.6	110.669	250.36	633.88	57.78	138.82	110.667	32.19	49.28	184.797	463.62	624.8	184.613	297.53	229.81	110.669	51.56	49.36	110.669	109.96	32.57
185.774	249.14	203.44	185.799	182.39	158.18	111.37	32.38	27.54	111.369	86.3	21.85	185.791	201.12	230.28	185.779	113.96	178.74	111.367	149.18	568.37	58.48	125.96	111.368	44.28	58.41	185.964	251.32	544.45	185.781	320.27	204.31	111.369	58.53	45.78	111.368	115.67	31.89
186.941	211.82	197.72	186.967	187.36	161.12	112.068	28.12	25.65	112.07	81.14	29.01	186.96	216.58	190.74	186.947	121.58	167.88	112.069	104.13	544.15	57.9	140.28	112.068	38.04	61.61	187.133	174.77	426.19	186.948	303.59	211.96	112.07	55.47	41.54	112.07	112.97	25.79
188.109	225.61	148.36	188.135	158.53	160.36	112.768	31.92	27.23	112.77	75.69	29.33	188.128	226.09	236.82	188.116	129.04	142.23	112.768	84.35	519.72	70.37	167.46	112.768	41.8	46.78	188.301	163.81	333.92	188.117	336.79	217.34	112.768	57.68	44.28	112.769	112.95	27.8
189.277	226.54	118.86	189.303	159.52	176.32	113.47	28.63	25.53	113.468	91.83	24.65	189.295	216.06	224.28	189.284	373.56	325.98	113.47	94.63	485.03	405.7	366.09	113.468	34.76	57.29	189.469	161.19	274.36	189.284	316.77	217.8	113.47	58.17	35.39	113.469	116.78	34.02
190.445	211.6	97.9	190.471	155.31	182.2	114.17	30.5	26.81	114.17	86.22	30.58	190.464	189.61	207.67	190.45	486.06	672.7	114.169	69.31	390.74	357.92	358.56	114.169	47.4	51.46	190.637	233.62	554.81	190.451	322.69	217.3	114.17	52.78	37.84	114.169	108.58	34.23
191.614	237.72	124.92	191.639	164.07	195.36	114.865	31.11	25.4	114.868	91.63	27.49	191.633	166.73	223.1	191.619	244.21	604.88	114.869	75.09	388.23	286.22	451.7	114.87	36.17	51.04	191.805	275.62	587.03	191.619	347.23	232.67	114.869	55.11	39.64	114.869	100.3	32.2
192.782	217.72	130.46	192.808	150.54	165.64	115.568	32.03	26.17	115.568	89.02	27.93	192.799	151.79	225.98	192.786	144.64	396.58	115.57	75.98	342.96	218.02	484.53	115.569	46.92	41.29	192.973	163.39	487.81	192.785	325.77	242.29	115.569	56.83	40.21	115.57	110.84	31.69
193.95	205.87	141.29	193.976	164.13	166.54	116.269	32.62	24.14	116.269	86.01	25.4	193.967	192.12	195.61	193.954	116.46	347.14	116.268	74.7	330.55	165.57	466.84	116.268	39.71	55.71	194.139	171.73	287.18	193.953	314.91	264.01	116.27	54.59	37.04	116.269	102.69	28.19
195.118	256.82	106.33	195.142	180.48	188.55	116.97	29.25	24.04	116.97	92.02	24.75	195.135	205.24	213.29	195.122	113.6	320.5	116.968	72.01	291.32	117.37	488.54	116.967	40.84	46.52	195.306	180.67	245.67	195.121	329.95	247.97	116.969	57.86	42.21	116.969	108.02	30.26
196.285	266.1	116.84	196.31	157.4	168.83	117.67	32.07	26.7	117.669	83.77	25.46	196.302	204.94	207.55	196.29	127.89	270.49	117.669	64.28	260.54	76.49	378.75	117.669	37.72	45.1	196.475	165.56	221.89	196.289	365.74	263.2	117.67	55.81	34.14	117.669	102.76	34.63
197.454	223.01	108.47	197.479	162.64	167.64	118.368	32.05	28.33	118.37	93.17	30.63	197.471	167.6	213.26	197.46	116.44	218.1	118.369	71.1	266.42	62.76	324.18	118.365	41.66	50.28	197.642	181.12	186.38	197.457	340.24	264.88	118.37	55.13	39.83	118.367	108.04	31.68
198.62	211.57	122.4	198.647	171.28	173.85	119.069	29.8	30	119.07	79.9	26.12	198.638	183.48	235.81	198.627	121.25	213.05	119.07	72.42	222.51	47.63	239.44	119.067	44.54	49.26	198.811	169.65	207.67	198.624	336.77	259.84	119.07	54.6	34.68	119.071	108.56	35.75
199.788	240.05	107.88	199.815	123.31	137.8	119.768	33.76	26.28	119.77	81.64	25.53	199.806	263.49	242.45	199.795	116.23	178.67	119.77	75.06	224.61	44.43	173.53	119.767	35.57	61.1	199.979	162	182.94	199.792	319.16	266.69	119.77	55.37	35.69	119.768	103.12	29.37
200.956	213.18	133.63	200.983	146.06	134.78	120.468	31.71	26.77	120.47	86.81	24.7	200.975	589.91	556.3	200.963	118.96	161.98	120.469	63.4	218.52	49.18	163.86	120.467	41.52	50.3	201.147	186.66	208.51	200.96	326.67	240.14	120.469	58.04	39.76	120.468	99.26	33.62
202.122	220.04	116.43	202.153	145.26	141.74	121.17	26.94	27.66	121.171	90.24	24.49	202.143	827.53	753.6	202.131	149.35	164.44	121.168	70.36	225.59	48.87	152.98	121.168	42.34	55.17	202.315	178.34	210.96	202.128	301.64	263.5	121.17	50.46	34.53	121.169	113.95	30.01
203.29	216.98	117.67	203.326	158.24	178.82	121.868	29.95	25.88	121.869	78.5	23.56	203.311	877.69	942.07	203.299	135.05	161.82	121.87	61.16	215.52	49.51	142.11	121.866	42.87	52.51	203.482	177.51	227.35	203.296	302.31	267.42	121.87	57.75	41.67	121.868	115	33.55
204.458	241.28	105.69	204.494	160.62	175.66	122.569	27.85	25.87	122.57	94.72	25.72	204.479	1242.37	788.19	204.467	568.74	537.37	122.57	72.76	222.07	56.74	142.74	122.567	45.73	45.97	204.65	181.74	176.71	204.464	314.33	245.03	122.571	55.8	38.09	122.569	113.7	31.42
205.626	228.98	91.84	205.666	177.98	184.78	123.268	29.43	26.16	123.268	83.07	28.89	205.647	750.6	1087.57	205.635	461.16	574.47	123.27	65.3	242.5	62.07	140.54	123.268	39.36	49.87	205.819	169.27	199.04	205.632	299.86	257.28	123.269	50.92	36.37	123.267	107.5	36.14
206.794	266.54	120.07	206.834	138.22	177.61	123.968	28.65	27.62	123.968	85.14	25.74	206.816	474.79	927.57	206.803	229.19	373.9	123.968	76.95	230.5	50.93	127.07	123.969	46.01	56.26	206.987	173.81	171.65	206.801	324.37	218.37	123.971	58.42	39.16	123.969	113.54	32.66
207.961	208.04	139.55	208.007	181.98	185.66	124.669	35.13	27.24	124.668	80.61	29.37	207.983	248.09	757.56	207.969	130.97	279.62	124.668	82.21	199.35	58.26	145.95	124.669	45.93	54.41	208.155	180.53	170.25	207.968	336.31	266.75	124.669	56.65	36.75	124.668	118.34	29.08
209.129	234.15	125.17	209.175	162.82	158.18	125.367	33.14	21.53	125.368	79.09	21.27	209.149	199.81	578.02	209.136	139.42	213.46	125.368	75.31	193.71	52.61	137.04	125.368	47.43	54.23	209.323	137.09	189.35	209.136	306.94	277.51	125.369	55.12	35.06	125.368	100.77	31.71
210.297	233.2	126.15	210.343	164.74	152.64	126.07	29.29	27.92	126.068	82.91	27.56	210.317	197.73	498.71	210.304	124.95	202.51	126.069	64.66	222.09	47.07	109.49	126.068	72.01	96.49	210.491	153.72	244.21	210.305	321.6	299.65	126.07	59.03	32.46	126.067	104.05	34
211.465	244.56	111.44	211.512	163.98	145.86	126.769	30.54	27.37	126.769	79.35	30.52	211.485	206.5	418.47	211.472	106.29	184.35	126.767	69.77	198.22	60.55	120.67	126.768	161.02	163.75	211.66	191.73	217.56	211.471	296.07	302.72	126.77	55.58	40.97	126.768	104.58	32.21
212.633	255.67	119.8	212.68	145.13	163	127.468	30	27.2	127.468	83.59	23.35	212.653	212.94	353.49	212.64	121.66	172.39	127.469	66.64	207.7	60.15	130.44	127.469	234.11	265.55	212.828	141.61	209.78	212.64	327.19	268.26	127.469	56.9	39.58	127.469	103.28	31.53
213.801	252.8	119.46	213.85	152.3	152.32	128.169	32.75	27.91	128.169	88.3	23.43	213.821	187.4	349.62	213.808	114.19	164.4	128.168	79.4	216.47	49.35	126.75	128.169	269.19	298.09	213.997	169.72	190.58	213.808	331.09	240.03	128.169	51.68	37.08	128.169	101.04	35.06
214.968	219.98	126.81	215.02	158.68	176.11	128.87	30	26.81	128.869	82.8	26.96	214.989	200.65	308.26	214.976	136.28	157.8	128.868	75.55	207.43	53.04	123.88	128.869	280.7	370.43	215.165	167.41	203.46	214.976	339.4	254.52	128.869	57.18	37.71	128.869	105.84	31.45
216.136	221.83	122.76	216.188	155.93	148.32	129.57	31.04	27.65	129.569	91.07	28.1	216.157	215.27	296.66	216.144	121.13	163.9	129.563	73.84	215.24	48.79	143.26	129.569	287.24	372.06	216.333	175.22	184.19	216.144	383.23	382.77	129.569	57.63	42.9	129.569	107.81	32.69
217.303	233.22	125.35	217.354	158.08	155.64	130.27	31.73	37.2	130.269	92.34	26.35	217.324	220.26	262.68	217.311	143.46	166.77	130.267	69.64	235.78	51.67	112.91	130.27	259.81	333.25	217.501	210.71	443.26	217.311	356.39	353.17	130.269	50.37	34.12	130.27	106.78	36.62
218.471	247.82	133.88	218.523	169.31	151.74	130.969	31.54	28.77	130.969	86.56	27.58	218.493	202.85	268.53	218.479	160	141.55	130.969	63.91	224.67	55.61	130.28	130.968	198.67	233.03	218.669	433.45	763.21	218.479	338.72	280	130.969	60.37	40.59	130.968	102.7	31.75
219.64	255.7	122.32	219.691	150.09	181.06	131.669	32.04	25.76	131.669	91.36	20.64	219.661	185.64	233.11	219.648	137.16	158.97	131.669	72.69	236.23	50.22	100.11	131.669	89.76	165.42	219.837	194.75	748.97	219.647	303.84	287.96	131.669	50.66	37.24	131.669	107.07	29.07
220.808	210.48	123.5	220.859	161.41	208.22	132.37	27.53	28.92	132.368	92.9	21.84	220.829	162.36	260.53	220.816	125.77	172.02	132.369	65.45	225.29	80.42	124.44	132.369	59.11	139.13	221.005	171.1	572.52	220.815	304.78	283.25	132.369	55.75	34.64	132.369	101.5	25.77
221.976	176.83	117.42	222.027	157.78	205.19	133.069	29.71	31.58	133.069	86.55	28.19	221.997	181.87	241.21	221.984	184.03	220.88	133.069	62.13	208.3	66.11	124.49	133.07	53.49	110.55	222.171	158.38	427.39	221.983	342.81	290.98	133.07	53.42	43.86	133.069	99.58	29.94
223.144	210.9	122.78	223.195	171.97	188.23	133.771	28.5	23.53	133.769	83.24	26.77	223.165	196.59	225.94	223.152	582.6	588.89	133.77	61.51	197.15	68.48	115.3	133.77	49.46	107	223.34	185.72	388.1	223.151	303.25	300.44	133.769	53.04	38.16	133.769	100.45	31.61
224.312	205.05	122.05	224.361	144.36	186.79	134.469	28.61	29.08	134.468	93.04	25.63	224.333	222.71	253.41	224.32	348	529.71	134.466	59.52	203.46	53.06	117.72	134.47	44.74	63.32	224.512	156.82	312.33	224.319	314.51	252.97	134.469	57.95	35.58	134.469	94.99	35.38
225.48	205.41	116.57	225.529	155.03	196.79	135.171	26.89	26.51	135.17	84.09	27.04	225.502	199.08	246.9	225.488	172.83	374.44	135.171	84.04	216.26	59.78	150.82	135.168	58.07	63.97	225.682	161.31	252.83	225.487	327.12	277.82	135.169	53.63	38.13	135.17	99.32	29.68
226.647	223.97	125.68	226.695	163.45	162.04	135.865	31.25	25.93	135.869	122.6	48.84	226.669	231.43	252.44	226.655	120.03	288.57	135.869	100.61	207.12	61.21	137.72	135.87	43.67	69.28	226.854	153.27	255.49	226.653	293.85	261.3	135.869	53.69	39.95	135.869	100.56	29.29
227.816	207.67	121.31	227.864	132.12	176.88	136.569	29.8	23.05	136.569	149.34	58.72	227.836	207.77	251.27	227.824	111.48	248.46	136.57	82.71	205.85	51.92	132.3	136.569	52.85	59.26	228.022	158.61	224.89	227.821	308.56	245.29	136.569	54.84	39.76	136.57	94.69	35.96
228.984	209.88	160.15	229.032	151.4	160.69	137.269	28.19	30.65	137.268	182.82	70.49	229.004	208.15	284.67	228.993	142.99	239.61	137.271	75.69	219.49	45.24	137.72	137.269	45.24	48.8	229.19	192.69	208.61	228.987	325.71	263.29	137.269	53.28	35.32	137.269	97.58	35.42
230.15	197.15	151.55	230.2	168.22	143.6	137.971	31.38	32.06	137.969	192.08	74.25	230.172	240.44	283.71	230.161	141.82	197.26	137.965	71.87	225.48	56.55	165.16	137.97	63.1	55.14	230.358	179.32	177.98	230.155	304.12	257.97	137.97	50.27	43.77	137.97	98.58	34.15
231.318	221.85	152.39	231.368	152.09	189.28	138.671	27.51	27.83	138.668	210.38	67.76	231.34	291.48	250.34	231.329	111.87	193.21	138.67	72.34	209.08	62.45	152.4	138.671	40.36	56.36	231.527	160.21	168	231.324	313.04	266.77	138.669	55.3	37.55	138.667	105.99	27.4
232.486	204.59	163.93	232.536	141.84	169.21	139.363	31.07	29.91	139.368	184.93	69.35	232.508	230.32	250.53	232.499	126.74	176.19	139.37	71.18	220.72	48.82	136.09	139.369	54.82	45.74	232.695	142.01	169.85	232.492	308.84	267.65	139.368	52.74	42.7	139.367	105.56	34.67
233.652	218.76	167.26	233.704	127.76	184.43	140.068	32.17	32.61	140.068	193.19	56.27	233.676	204.05	266.61	233.667	141.73	166.04	140.071	78.24	211.61	57.55	145.23	140.071	57.71	53.65	233.863	205.45	218.49	233.661	312.23	279.72	140.071	51.58	37.76	140.069	136.5	50.68
234.821	202.14	153.91	234.872	161.87	231.21	140.768	30.21	34.38	140.768	171.41	52.67	234.844	205.71	258.24	234.836	153.56	184.16	140.77	81.81	246.98	58.71	140.54	140.77	54.63	74.38	235.031	184.69	252.76	234.83	323.97	299.65	140.769	54.12	41.79	140.767	223.87	100.96
235.993	915.02	407.73	236.041	148.57	223.76	141.47	29.97	36.32	141.47	172.65	39.9	236.011	203.96	232.3	236.003	113.26	168.93	141.465	87.4	261.81	44.7	133.25	141.468	58.4	67.43	236.199	153.84	259.54	235.996	331	309.71	141.469	55.7	37.42	141.469	266.84	123.53
237.166	883.15	545.41	237.21	145.2	223.19	142.169	31.56	33.03	142.17	151.86	31.5	237.179	182.19	254.48	237.17	143.42	159.4	142.17	99.5	259.24	60.49	137.86	142.168	51.24	48.88	237.368	153.7	247.85	237.164	347.29	323.63	142.17	53.23	38.35	142.168	297.47	126.47
238.335	407.19	473.35	238.379	163.67	229.66	142.869	28.34	32.15	142.869	146.08	28.88	238.347	191.14	219.43	238.339	132.46	154.15	142.871	107.1	280.21	58.12	134.14	142.868	48.08	48.71	238.535	535.42	692.12	238.332	308.72	318.78	142.869	53	37.56	142.868	321.93	119.3
239.506	247.5	379.01	239.546	172.45	195.89	143.569	32.77	29.2	143.568	144.38	27.25	239.514	212.3	271.55	239.507	137.61	146.04	143.571	101.99	242.98	47.49	142.84	143.567	48.45	43.9	239.703	226.66	641.35	239.5	287.44	279.18	143.57	55.25	38.27	143.567	332.79	134.92
240.674	204.39	319.05	240.714	156.7	266.06	144.269	28.15	33.38	144.269	127.46	25.21	240.682	195.68	266.6	240.675	158.36	145.3	144.269	61.45	256.55	48.82	147	144.267	44.56	57.57	240.871	168.45	515.21	240.669	334.51	277.82	144.269	53.52	37.12	144.267	323.8	132.29
241.842	218.12	286.5	241.882	1180.06	1020.28	144.969	30.41	33.42	144.967	113.42	29.14	241.85	175.3	240.01	241.843	203.32	222.18	144.965	64.17	243.34	48.17	139.91	144.967	57.09	62.04	242.039	203.72	397.47	241.836	304.02	244.9	144.969	50.17	40.75	144.967	319.42	105.36
243.01	223.17	205.37	243.05	1061.46	1002.11	145.669	27.07	36.06	145.669	107.03	26.8	243.017	173.66	254.43	243.013	549.09	685.33	145.67	68.16	233.44	51.02	153.86	145.667	54	55.99	243.207	159.51	348.63	243.004	335.34	236.61	145.669	48.81	36.35	145.668	313.37	76.63
244.178	748	433.58	244.218	1165.99	1062.41	146.369	34.36	29.18	146.369	99.45	23.73	244.186	207.95	261.73	244.181	299.45	557.24	146.37	73.36	208.15	49.8	133.58	146.369	47.89	53.23	244.375	178.74	270.38	244.173	320.72	272.95	146.371	55.25	39.59	146.368	291.5	52.66
245.347	555.27	446.47	245.385	364.1	895.28	147.07	32.6	33.45	147.067	105.37	26.57	245.353	281.79	278.66	245.348	168.24	424.94	147.069	60.98	230.19	56.8	145.53	147.067	52.63	44.9	245.543	192.19	248.83	245.341	310.17	312.29	147.068	53.67	38.28	147.068	260.87	47.36
246.514	259.92	394.42	246.554	177.64	620.06	147.769	31.61	29.07	147.769	91.93	25.46	246.522	232.02	269.11	246.517	136.21	356.63	147.768	255.39	388.34	48.76	148.74	147.769	48.66	61.14	246.711	152.56	248.63	246.509	325.53	272.01	147.77	50.96	41.65	147.767	225.76	40.81
247.682	230.53	323.57	247.723	168.29	342.4	148.469	27.44	30.3	148.469	99.31	25.79	247.689	223.53	283.57	247.685	136.65	304.44	148.464	306.74	561.04	55.65	150.93	148.468	45.83	43.09	247.878	165.81	191.79	247.677	306.34	247.38	148.469	51.51	35.37	148.468	196.03	34.66
248.848	247.52	276.84	248.89	146.77	207.83	149.168	29.96	31.93	149.169	90.6	26.41	248.856	267.16	312.37	248.852	354.36	456.19	149.17	252.37	613.34	49.72	120.37	149.169	35.91	56.57	249.046	148.77	188.98	248.844	297.43	281.06	149.169	54.47	39.24	149.168	170.31	40.66
250.016	229.05	241.54	250.058	153.32	194.6	149.864	27.51	31.76	149.869	89.73	27.69	250.024	839.38	731.51	250.02	399.89	651.62	149.87	378.22	710.11	51.44	132.28	149.869	43.07	49.52	250.214	174.18	185.03	250.013	307.38	282.09	149.867	85.25	99.9	149.867	164.54	29.07
251.184	211.49	235.26	251.226	143.97	157.4	150.57	28.72	28.15	150.568	87.28	27.09	251.192	721.89	828.97	251.188	174.64	370.86	150.569	341.37	750.46	54.39	134.07	150.569	44.16	52.81	251.382	166.36	196.92	251.18	301.11	225.62	150.568	153.32	188.89	150.568	152.45	35.67
252.352	212.43	231.36	252.394	162.23	160.15	151.269	33.28	25.83	151.269	87.66	24.94	252.36	1206.15	908.87	252.356	134.57	275.66	151.269	242.54	611.21	44.8	122.65	151.269	48.35	49.86	252.55	189.07	162.96	252.349	307.14	265.01	151.268	151.3	181.21	151.268	133.09	31.04
253.52	216.26	173.1	253.562	163.2	184.68	151.969	29.29	26.04	151.969	90.72	23.09	253.529	949.71	1083.98	253.524	126.11	230.28	151.966	164.69	531.36	45.3	160.16	151.969	48.3	56.94	253.718	169.69	186.52	253.518	313.01	269.22	151.968	149.18	195.89	151.968	130.17	30.45
254.686	204.19	160.18	254.73	165.74	203.01	152.67	28.63	26.49	152.669	88.06	24.54	254.696	513.24	1037.07	254.693	120.61	227.88	152.669	103.62	578.65	50.49	186.19	152.67	49.97	61.58	254.884	189.93	195.84	254.684	312.86	256.88	152.668	175.59	195.13	152.668	111.56	30.23
255.853	199.8	165.8	255.899	208.38	196.79	153.369	27.41	27.52	153.368	87.76	27.89	255.864	301.43	780.94	255.862	116.41	174.36	153.37	85.42	520.95	58.89	184.82	153.368	42.21	55.09	256.052	187.04	198.58	255.852	330.66	262.63	153.369	149.25	165.66	153.37	117.67	32.15
257.023	227.58	175.19	257.067	150.48	214.07	154.07	29.89	27.65	154.069	86.48	28.63	257.032	215.21	504.54	257.031	125.82	172.82	154.07	72.73	461.86	63.03	164.09	154.069	41.16	46.41	257.22	176.33	181.64	257.02	299.82	259.82	154.07	94.18	146.88	154.069	112.5	32.22
258.195	206.27	131.12	258.235	178.33	177.83	154.768	31.93	26.42	154.77	86.66	29.03	258.199	190.55	440.56	258.199	116.28	155.54	154.77	69.61	420.55	45.53	162.11	154.768	49.07	58.62	258.389	154.76	175.09	258.188	312.34	235.06	154.769	75.25	129.37	154.769	110.21	34.79
259.363	211.18	131.78	259.403	141.62	174.25	155.47	33	33.32	155.469	83.27	28.17	259.368	173.6	366.76	259.368	170.54	175.93	155.47	78.28	378.12	44.79	148.53	155.47	44.83	61.86	259.557	613.35	655.72	259.356	319.01	237.82	155.468	61.82	100.62	155.469	120.03	33.89
260.531	197.33	136.95	260.571	176.32	152.44	156.17	52.9	115.51	156.171	89.54	28.5	260.536	199.91	327.53	260.536	119.6	142.58	156.168	75.15	347.31	47.11	166.4	156.168	44.48	58.43	260.726	346.16	537.69	260.523	338.37	258.86	156.168	54.64	82.66	156.169	108.99	27.66
261.699	207.84	118.08	261.739	154.34	162.74	156.87	63.15	157.12	156.87	88.24	24.05	261.704	189.08	318.75	261.704	107.03	146.86	156.87	80.02	302.66	47.49	147.4	156.87	46.36	57.03	261.894	202.55	567.26	261.691	334.2	241.58	156.87	57.37	69.62	156.869	116.22	34.47
262.867	201.42	115.74	262.907	184.02	161.23	157.57	61.37	192.21	157.57	85.44	25.87	262.872	165.05	298.44	262.872	108.81	175.96	157.569	67.36	279.98	43.73	139	157.57	46.25	60.67	263.06	187.63	398.39	262.859	312.69	249.16	157.568	58.36	60.94	157.57	106.97	33.99
264.034	249.17	133.5	264.074	161.56	173.11	158.269	70.11	200.67	158.269	79.46	23.2	264.038	243.43	294.76	264.04	140.47	151.99	158.27	62.26	255.18	49.33	142.12	158.268	47.7	48.61	264.228	154.27	354.36	264.027	312.08	240.52	158.269	56.62	49.97	158.268	104.5	28.63
265.201	217.18	127.75	265.243	166.66	173.41	158.97	77.95	231.36	158.971	95.35	26.71	265.204	196.91	292.71	265.207	168.61	170.65	158.971	62.15	249.69	44.55	140.09	158.968	49.18	55.86	265.396	173.05	314.21	265.195	333.73	237.31	158.969	56.85	45.82	158.969	110	38.35
266.369	213.16	130.33	266.411	152.51	179.64	159.669	70.22	200.51	159.67	88.85	23.78	266.372	195.07	260.32	266.375	153.02	155.25	159.669	83.74	232.23	48.46	170.23	159.669	42.65	47.29	266.564	168.75	390.1	266.363	311.16	238.58	159.67	58.86	43.61	159.668	106.64	32.06
267.537	207.3	113.72	267.579	183.23	173.79	160.364	46.92	155.6	160.371	89.12	27.47	267.539	172.51	224.56	267.543	134.64	150.89	160.369	69.99	239.56	353.37	421.46	160.37	49.75	48.04	267.733	374.07	779.78	267.529	315.64	238.69	160.369	57.57	45.35	160.367	110.81	32
268.705	236.9	112.59	268.747	170.58	171.8	161.069	38.79	135.03	161.07	96.22	27.77	268.707	212.07	267.18	268.711	256.52	258.81	161.069	60.77	215.27	335.35	440.07	161.068	46.67	52.23	268.901	202.96	624.61	268.697	333.34	277.03	161.068	52.53	38.59	161.067	98.96	30.57
269.873	208.73	123.09	269.915	156.37	151.73	161.769	41.04	115.3	161.77	93.72	31.77	269.873	183.95	276.55	269.88	578.09	676.44	161.769	58.76	206.76	301.42	453.91	161.77	46.7	51.26	270.069	151.11	658.85	269.865	323.21	304.65	161.77	50.34	40.83	161.767	104.65	28.27
271.041	231.18	182.19	271.083	141.21	195.14	162.469	30.9	94.47	162.47	136.97	47.97	271.041	211.12	268.57	271.048	518.4	686.99	162.47	76.54	209.42	282.09	598.84	162.47	44.07	56.51	271.237	182.03	510.13	271.033	316.96	283.71	162.469	59.42	34.2	162.467	105.21	31.47
272.21	1038.29	439.8	272.251	157.78	187.75	163.168	33.04	81.25	163.17	162.73	57.98	272.21	204.56	271.52	272.217	355.47	513.6	163.169	63.58	196.1	200.02	638.72	163.168	47.43	51.2	272.405	153.2	402.3	272.2	312.47	259.49	163.169	53.41	39.8	163.168	99.71	32.6
273.378	432.33	469.35	273.418	159.91	205.94	163.87	33.21	68.64	163.868	185.93	63.54	273.377	208.26	247.36	273.39	150.23	349.33	163.87	67.57	193.98	100.6	551.74	163.868	45.39	61.71	273.573	357.61	776.27	273.369	318.66	261.84	163.869	57.11	38.73	163.868	97.56	32.62
274.546	252.29	302.56	274.586	162.22	215.1	164.568	32	61.69	164.568	192.32	67.03	274.545	181.91	247.44	274.562	116.75	283.92	164.571	77.28	209.39	75.69	465.79	164.569	48.57	63.87	274.741	203.69	695.9	274.537	322.97	235.15	164.57	48.66	35.52	164.569	102.42	34.28
275.716	221.39	253.33	275.755	154.6	230.16	165.268	33.04	54.91	165.27	205.39	74.68	275.713	211.48	230.67	275.734	120.4	258.94	165.271	75.51	207.5	68.42	399.49	165.267	47.82	51.65	275.907	159.4	580.16	275.705	303.38	243.12	165.269	53.64	37.73	165.269	102.77	28.46
276.884	216.71	218.39	276.923	162.02	181.04	165.967	32.56	48.37	165.969	190.72	66.92	276.881	224.96	261.96	276.904	109.7	206.06	165.969	60.07	226.23	57.64	288.51	165.968	46.53	56.17	277.076	176.72	417.54	276.873	299.69	265.95	165.97	59.48	35.37	165.968	96.41	32.05
278.052	175.52	187.98	278.091	128.62	224.5	166.669	29.82	39.44	166.67	180.9	52.94	278.049	223.08	268.88	278.072	103.99	168.64	166.667	71.74	223.68	120.98	479	166.668	54.85	39.58	278.243	147.11	357.61	278.042	307.97	217.53	166.67	52.03	35.13	166.668	102.38	33.1
279.221	200.44	194.69	279.258	157.32	229.43	167.365	28.41	36.81	167.368	182.44	45.25	279.215	224.61	244.95	279.242	113.25	169.68	167.369	62.2	211.89	160.16	460.4	167.368	49.78	46.36	279.411	160.51	265.7	279.209	299.59	228.31	167.369	56.4	35.77	167.368	104.07	31.86
280.389	215.8	174.26	280.426	159.97	219.11	168.069	29.7	36.01	168.068	175.03	37.29	280.383	186.36	231.06	280.412	130.27	150.65	168.068	60.16	202.57	76.37	368.74	168.068	44.37	46.91	280.579	164.72	233.75	280.378	306.79	231.1	168.069	51.4	33.36	168.068	97.61	29.73
281.557	221.11	121.44	281.594	145.42	223.23	168.768	31.49	30.99	168.768	151.66	32.29	281.551	206.43	254.69	281.582	136.77	138.18	168.768	71.25	229.47	56.88	319.04	168.768	51.75	41.55	281.747	171.71	231.4	281.546	306.45	223.46	168.769	54.41	38.98	168.767	100.15	34.07
282.724	222.18	139.53	282.76	138.93	230.6	169.468	31.54	32.5	169.47	145.4	26.75	282.719	223.19	263.74	282.754	122.74	150	169.468	71.52	225.88	48.12	235.09	169.468	42.43	64.49	282.915	182.7	208.35	282.712	293.44	250.07	169.469	50.28	37.64	169.468	99.65	33.72
283.89	211	125.43	283.929	144.34	195.12	170.169	34.92	35.52	170.169	139.9	25.36	283.887	218.57	264.22	283.924	98.1	114.53	170.17	64.8	232.5	49.35	214.93	170.167	45.85	56.14	284.083	147.14	216.25	283.88	327.24	253.95	170.17	54.48	37.54	170.169	98.44	29.84
285.06	222.55	141.78	285.097	142.07	206.48	170.865	25.5	31.21	170.869	133.69	33.25	285.057	222.18	239.77	285.096	117.27	156	170.868	57.74	196.5	55.57	199.16	170.867	54.69	50.62	285.249	177.41	280.97	285.048	321.72	253.85	170.868	54.96	39.34	170.869	108.52	38.08
286.228	225.92	122.88	286.265	158.61	229.45	171.568	28.73	30.89	171.57	128.53	24.52	286.225	226.1	257.64	286.268	120.89	141.94	171.568	68.82	229.83	54.26	203.18	171.567	42.61	53.41	286.418	391.69	531.31	286.216	316.82	257.54	171.568	54.89	35.57	171.569	104.73	37.42
287.396	238.51	142.86	287.433	142.9	210.34	172.268	31.06	29.44	172.27	112.85	28.36	287.397	226.05	238.6	287.439	140.45	137.34	172.268	66.52	216.33	44.85	191.82	172.267	45.94	48.99	287.586	184.02	465.47	287.384	289.44	233.06	172.27	54.17	42	172.268	97.62	36.36
288.564	1001.53	498.24	288.6	165.53	204.32	172.969	30.9	27.55	172.97	119.18	29.05	288.564	196.22	251.44	288.607	154.79	164.95	172.97	75.88	196.26	54.94	200.68	172.969	45.53	50.84	288.754	165.88	425.85	288.551	285.13	239.39	172.969	57.49	36.84	172.969	103.08	28.67
289.732	479.26	434.29	289.767	169.09	236.63	173.669	31.56	27.81	173.67	102.66	28.03	289.737	177.3	207.79	289.778	556.85	580.32	173.67	70.44	184.76	61.21	173.67	173.669	87.53	109.45	289.922	155.44	319.67	289.72	310.5	218.56	173.671	54.89	40.58	173.669	103.32	36.12
290.901	281.09	339.11	290.935	133.91	209.88	174.369	32.06	24.97	174.37	101.44	23.02	290.909	183.06	243.91	290.946	295.46	436.51	174.369	74.01	187.19	55.62	174.47	174.369	140.24	189.32	291.09	158.12	294.63	290.888	297.77	206.04	174.37	58.99	37.27	174.368	107.46	40.02
292.07	230.27	291.78	292.103	171.98	198.36	175.07	29.03	23.21	175.069	103.34	25.34	292.077	197.6	237.07	292.116	140.09	291.31	175.068	69.16	187.5	47.49	179.81	175.07	222.1	289.71	292.258	181.03	324.34	292.055	336.72	191.59	175.068	52.17	33.59	175.068	110.41	38.86
293.238	227.69	245.1	293.271	176.51	176.4	175.77	32.28	25.99	175.77	104.86	27.01	293.247	198.25	256.03	293.288	127.58	242.62	175.77	76.88	182.03	49.61	159.96	175.768	282.62	334.38	293.426	371.91	552.97	293.223	318.84	220.83	175.769	55.5	34.52	175.768	114.67	33.45
294.406	207.82	181.73	294.439	153.05	213.57	176.469	29.27	28.16	176.469	101.62	27.26	294.417	169.75	249.22	294.458	121.7	232.18	176.47	66.82	182.43	156.4	272.14	176.469	273.31	364.28	294.592	167.23	559.65	294.389	302.43	190.25	176.468	57.76	35.72	176.469	122.04	36.37
295.574	565.29	391.27	295.607	182.97	185.59	177.169	28.82	26.12	177.17	102.46	24.16	295.585	179.15	235.57	295.628	110.54	223.65	177.168	60.81	188.3	343.16	390.63	177.167	260.44	349.99	295.761	171.89	403.16	295.557	318.42	207.59	177.169	57.45	31.93	177.169	114.46	32.94
296.74	621	447.95	296.776	124.02	175.37	177.865	30.31	31.51	177.868	98.77	27.31	296.753	286.71	270.88	296.796	150.54	181.62	177.87	59.83	191.44	232.36	422.56	177.869	236.06	321.36	296.929	166.13	372.42	296.725	316.48	203.7	177.869	60.1	39.23	177.868	101.92	31.82
297.91	292.96	361.06	297.943	184.85	174.12	178.568	31.85	27.72	178.57	101.5	24.1	297.922	582.5	547.52	297.968	122.49	175.17	178.569	83.28	234.63	233.52	514.93	178.569	136.9	237.91	298.097	152.69	284.04	297.891	326.14	195.59	178.568	57.7	34.34	178.57	110.92	23.92
299.077	258.6	292.39	299.11	164.43	209.59	179.269	31.35	26.61	179.269	94.81	27.22	299.091	805.32	731.64	299.137	115	166.71	179.269	85.69	252.5	175.76	551.56	179.269	80.44	171.97	299.265	155.64	253.07	299.059	307	228.92	179.27	52.23	34.8	179.269	106.38	33.06
						179.969	29.76	22.62	179.969	95.91	26.03							179.97	73.21	268.48	94.76	461.47	179.969	64.85	114.52							179.97	54.63	35.11	179.97	106.8	28.92
						180.669	32.43	27.89	180.67	103.95	24.24							180.67	62.18	279.54	60.43	416.91	180.668	45.3	105.81							180.67	51.22	33.91	180.668	99.37	30.16
						181.369	32.19	27.42	181.369	115.51	38.37							181.368	66.31	290.33	54.52	334.72	181.37	54.42	81.42							181.368	55.72	37.96	181.367	102.85	30.16
						182.068	32.78	29.34	182.07	161.83	61.5							182.068	67.86	285.58	58.48	272.63	182.069	51.38	86.13							182.069	54.61	41.57	182.068	106.66	32.09
						182.769	32.7	24.73	182.77	173.29	62.74							182.768	57.09	300.08	63.33	253.93	182.769	49.66	60.14							182.769	57.81	34.6	182.77	105.76	28.69
						183.469	35.89	26.48	183.47	187.34	62.87							183.468	58.76	279.6	47.1	222.04	183.467	47.27	66.22							183.468	52.92	36.15	183.468	117.89	29.26
						184.169	30.65	26.86	184.17	192.03	65.48							184.168	69.42	280.65	46.1	173.84	184.168	66.71	64.3							184.17	53.16	34.73	184.17	115.42	34.9
						184.863	31.99	25.3	184.869	168.66	54.69							184.868	75.7	291.23	52.91	186.42	184.868	44.58	58.64							184.87	59.47	40.82	184.868	138.2	29.23
						185.569	32.25	25.43	185.567	170.44	43.23							185.569	190.11	337.21	51.93	166.98	185.567	56.31	58.68							185.57	57.91	36.09	185.569	234.2	88.16
						186.269	27.4	24.25	186.268	155.6	34.91							186.27	329.8	590.5	61.36	194.44	186.267	44.56	58.54							186.27	54.48	40.56	186.269	267.1	112.82
						186.969	29.53	26.74	186.968	146.33	29.95							186.968	348.43	720.6	48.31	161.23	186.968	48.67	59.71							186.971	51.89	40.7	186.968	295.18	112.74
						187.671	32.74	30.08	187.669	133.12	31.32							187.668	364.28	797.79	65.66	157	187.668	50.91	56.45							187.67	53.85	36.42	187.669	343.97	124.71
						188.365	31.11	31.88	188.369	124.79	25.24							188.368	339.91	825.86	55.33	165.28	188.369	38.34	60.51							188.37	54.74	37.59	188.367	346.08	130.86
						189.071	28.94	23.87	189.067	137.12	27.04							189.068	336.14	775.7	54.72	155.82	189.069	39.42	61.03							189.07	50.92	36.16	189.07	405.87	144.98
						189.768	31.66	28.76	189.768	113.19	23.5							189.77	242.81	611.88	59.55	166.32	189.768	52.61	52.14							189.77	56.52	42.36	189.768	380.93	114.72
						190.471	26.64	25.18	190.47	109.24	24.4							190.469	167.42	536.87	56.73	176.58	190.468	46.09	63.35							190.47	55.73	42.56	190.47	355.83	76.59
						191.17	31.84	25.62	191.169	110.5	29.53							191.169	106.9	539.33	59.83	177.67	191.168	42.18	58.72							191.17	62.09	34.18	191.169	326.74	65.28
						191.869	25.92	27.65	191.869	112.41	29.02							191.868	83.67	491.69	65.25	157.81	191.869	50.47	67.45							191.87	61.99	44.22	191.868	309.46	39.82
						192.571	30	28.05	192.568	91.08	27.22							192.568	71.36	431.96	45.75	150.65	192.57	54.3	52.03							192.568	54.9	40.73	192.569	296.33	37.5
						193.269	30.37	23.32	193.269	90.76	26.77							193.268	74.99	276.29	100.83	319.49	193.268	42.07	53.35							193.269	56.37	42.28	193.27	260.47	40.32
						193.968	28.14	26.03	193.969	86.88	25.25							193.97	74.99	276.29	100.83	319.49	193.97	33.35	57.07							193.969	54.51	39.52	193.97	232.44	31.71
						194.67	29.71	26.85	194.669	90.89	27.27							194.669	74.99	276.29	100.83	319.49	194.669	38.66	46.2							194.669	49.61	36.5	194.67	217.07	33.96
						195.369	30.65	26.93	195.368	82.51	29.23							195.369	74.99	276.29	100.83	319.49	195.369	52.49	59.28							195.369	57.4	36.52	195.37	192.51	31.49
						196.069	28.43	28.93	196.068	93.74	24.49							196.068	71.11	251.51	71.21	287.75	196.068	47.57	50.83							196.07	51.26	34.76	196.068	180.79	25.84
						196.77	27.34	23.26	196.769	94.18	23.25							196.769	65.39	243.31	63.51	217.96	196.768	45.33	57.14							196.769	57.4	34.87	196.77	156.37	33.16
						197.469	31.89	25.29	197.467	74.41	25.32							197.47	70.69	234.16	58.91	178	197.469	48.42	61.83							197.47	56.06	33.23	197.468	158.06	26.37
						198.17	27.35	25.67	198.17	95.47	21.89							198.17	68.49	236.61	40.09	204.86	198.168	46.96	62.71							198.169	52.8	40.88	198.17	138.61	29.58
						198.869	31.72	26.31	198.868	82.67	28.54							198.868	64.02	210.29	60.63	171.33	198.87	38.16	54.68							198.868	58.14	32.21	198.868	128.46	33.59
						199.569	29.88	22.81	199.568	83.77	22.81							199.568	65.23	227.2	50.18	180.35	199.57	45.1	65.8							199.568	54.39	30.89	199.57	129.41	31.97
						200.269	29.03	24.54	200.268	87.27	29.97							200.269	76.55	232.11	62.62	254.84	200.27	60.56	57.78							200.269	51.18	37.57	200.269	118.42	31.75
						200.969	32.33	28.32	200.969	78.02	23.64							200.969	74.51	226.98	199.97	371.32	200.97	57.44	80.74							200.97	50.19	33.45	200.969	117.84	37.92
						201.671	28.59	28.52	201.668	78.5	24.13							201.67	75.44	223.62	119.89	381.14	201.669	43.24	57.06							201.67	57.53	35.45	201.668	108.98	34.6
						202.365	28.87	23.77	202.369	80.88	22.23							202.369	64.39	212.35	68.55	342.3	202.369	51.35	55.75							202.369	56.98	36.98	202.368	118.53	29.94
						203.069	31.49	29.61	203.07	80.55	29.06							203.071	72.63	200.76	69.49	295.3	203.07	52.57	49.54							203.07	52.36	39.07	203.069	100.54	29.86
						203.768	32.82	24.14	203.769	92.47	26.41							203.769	86.44	228.23	62.44	277.26	203.77	47.72	61.14							203.769	55.02	40.65	203.768	103.68	30.87
						204.468	32.06	28.54	204.469	85.27	25.71							204.471	101.28	217.67	66.98	210.86	204.464	54.24	56.42							204.47	54.01	36.76	204.468	101.89	30.79
						205.17	31.23	25.34	205.169	96.27	24.77							205.171	95.77	207.93	51.24	193.44	205.17	53.28	48.72							205.171	55.15	36.47	205.168	116.74	33.68
						205.87	30.71	28.39	205.869	94.76	25.16							205.871	74.85	230.12	50.48	184.67	205.87	57.91	54.9							205.87	54.91	34.71	205.868	110.57	30.68
						206.568	32.77	25.87	206.567	93.56	26.27							206.57	72.12	221.38	52.79	157.09	206.564	54.56	63.9							206.571	55.98	36.98	206.568	105.2	33.38
						207.268	30.88	28.43	207.268	95.64	25.49							207.272	77.5	228.51	54.29	172	207.268	92.28	96.8							207.27	55.63	37.91	207.269	110.46	30.51
						207.97	28.26	28.62	207.968	93.56	25.67							207.971	66.12	225.2	50.69	155.42	207.969	168.54	169.86							207.971	54.15	33.74	207.969	114.83	39.44
						208.669	31.36	24.49	208.667	93.01	31.47							208.67	82.02	205.17	57.73	174.93	208.669	254.18	223.9							208.67	53.56	39.5	208.669	107.53	34.98
						209.364	30.51	27.93	209.367	82.16	26.42							209.37	90.04	253.6	52.02	178.12	209.368	282.65	315.23							209.371	58.95	35.34	209.368	114.89	35.4
						210.068	28.01	28.73	210.069	88.04	27.57							210.069	97.45	228.86	49.4	145.11	210.064	254.65	311.06							210.069	53.06	37.79	210.07	108.32	36.28
						210.768	26.47	26.45	210.769	87.63	22.19							210.769	94.36	240.65	52.08	147.68	210.768	285.69	335.45							210.769	55.99	37.42	210.768	105.34	32.6
						211.47	30.79	25.61	211.468	85.61	29.48							211.47	95.23	234.93	46.67	147.35	211.466	194.15	262.1							211.467	54.39	34.51	211.468	105	29.03
						212.169	32.57	29.09	212.169	82.82	25.99							212.17	96.2	224.62	51.76	142.18	212.169	98.62	172.42							212.169	50.74	33.89	212.168	106.83	23.1
						212.865	28.58	24.34	212.869	97.93	32							212.869	92.96	220.55	51.94	133.14	212.869	67.06	147.64							212.867	58.48	40.3	212.868	89.03	37.32
						213.568	30.58	29.38	213.568	127.22	48.04							213.569	81.94	210.75	55.71	148.88	213.57	54.46	121.67							213.568	58.01	38.84	213.568	99.67	24.41
						214.27	32.35	29.28	214.269	158.91	61.88							214.269	113.32	243.16	50.84	155.02	214.268	50.84	101.03							214.269	58.26	39.18	214.268	91.67	34.49
						214.969	33.47	30.22	214.97	162.95	69.51							214.969	326.32	375.98	51.24	166.96	214.97	40.7	76.81							214.968	57.2	34.98	214.97	98.73	32.11
						215.669	27.83	22.87	215.67	168.25	65.4							215.669	284.69	463.19	43.99	148.32	215.668	47.78	75							215.668	51.61	39.32	215.669	100.71	33.39
						216.369	28.17	29.76	216.369	140.62	52.32							216.371	217.65	464.65	46.08	123.07	216.37	53.69	54.23							216.369	58.02	40.74	216.369	101.9	37.63
						217.069	28.75	27.67	217.07	135.07	44.7							217.069	225.37	414.5	50.87	156.68	217.07	48.08	53.1							217.069	58.63	37.81	217.068	105.32	30.18
						217.77	28.52	30.71	217.769	130.22	36.09							217.769	146.56	374.19	51.94	153.21	217.769	63.24	51.38							217.769	56.82	40.77	217.768	138.44	49.65
						218.47	30.55	29.21	218.469	121.31	32.22							218.468	92.5	390.37	48.01	155.72	218.468	56.56	59.68							218.469	56.88	41.09	218.469	202.56	121.92
						219.171	28.18	26.56	219.17	129.35	25.42							219.17	83.34	386.81	53.15	154.72	219.169	53.71	48.8							219.17	56.2	35.95	219.17	232.7	121.05
						219.869	29.47	30.41	219.869	103.78	30.77							219.87	84.28	357.41	46.93	170.33	219.87	53.11	50.62							219.869	58.86	39.47	219.869	290.87	121.7
						220.569	28.82	33.16	220.571	100.36	28.6							220.568	95.2	338.13	47.46	150.49	220.57	53.62	44.01							220.568	57.85	35.53	220.569	303.65	128.18
						221.269	30.04	27.35	221.269	97.3	24.42							221.27	91.46	299.75	46.53	160.84	221.27	54.46	43.59							221.268	52.33	35.48	221.269	273.73	114.95
						221.971	29.38	30.24	221.969	110.23	21.21							221.969	81.76	293.65	47.62	162.44	221.968	41.21	59.86							221.968	49.77	34.07	221.97	268.15	75.06
						222.67	31.22	29.45	222.669	94.31	25.64							222.669	75.38	261.16	44.07	140.44	222.668	53.31	46.68							222.67	54.26	40.19	222.667	243.96	61.13
						223.367	29.07	24.91	223.369	88.77	24.53							223.37	63.18	281.06	38.75	148.86	223.368	58.07	47.46							223.368	53.98	37.95	223.367	231.93	45.34
						224.07	31.48	28.66	224.069	92.56	30.05							224.07	73.72	245.24	40.71	127.77	224.069	59.78	60.75							224.068	56.05	38.64	224.069	205.1	30.71
						224.767	29.15	30.34	224.77	85.23	27.17							224.77	62.65	262.8	49.08	154.53	224.769	49.16	55.26							224.769	53.5	38.49	224.768	179.57	37.22
						225.468	29.3	21.91	225.469	88.76	27.18							225.47	95.03	270.72	49.08	146.88	225.468	52	54.84							225.468	55.95	38.24	225.469	163.82	33.51
						226.168	34.9	25.75	226.171	88.69	35.3							226.17	244.28	395.76	53.55	159.96	226.168	48.1	45.23							226.17	52.93	42.71	226.167	158.73	32.45
						226.868	28.31	24.05	226.869	84.98	26.81							226.87	178.18	364.48	47.37	157.84	226.87	51.97	44.41							226.87	56.33	39.81	226.869	143.27	29.01
						227.568	30.85	30.88	227.569	77.12	27							227.569	137.23	273.53	54.09	171.42	227.568	51.8	57.01							227.569	53.4	43.41	227.567	140.2	27.61
						228.27	26.89	24.26	228.269	78.72	27.51							228.271	111.72	257.05	48.2	170.39	228.268	43.07	46.03							228.27	51.9	35.12	228.269	120.06	33.86
						228.968	26.37	24.77	228.969	91.72	23.95							228.968	96.82	254.2	47.49	161.04	228.968	41.02	44.88							228.97	56.83	43.21	228.969	112.15	33.1
						229.669	28.03	25.14	229.67	87.37	29.47							229.669	75.18	270.53	47.39	157	229.669	56.46	87.28							229.669	52.77	37.99	229.668	113.63	36.49
						230.369	31.58	26.27	230.368	87.85	25.93							230.369	269.26	318.76	59.8	165.18	230.368	116.53	126.81							230.371	52.51	35.21	230.367	113.51	28.68
						231.068	30.46	25.8	231.069	90.49	25.61							231.067	256.05	365.94	45.27	159.21	231.07	177.57	183.67							231.07	59.25	38.87	231.068	103.68	34.5
						231.769	30.34	27.03	231.769	90.4	24.74							231.767	166.02	323.99	43.38	156.89	231.768	227.66	220.75							231.77	49.21	39.8	231.768	176.66	78.57
						232.469	31.37	25.97	232.469	79.94	24.56							232.469	99.99	303.01	50.46	146.68	232.468	176.84	243.35							232.47	54.96	34.63	232.468	222.47	102.23
						233.169	29.85	29.59	233.169	82.37	24.63							233.169	77.97	251.5	47.93	149.19	233.167	185.26	250.03							233.17	52.94	33.05	233.169	245.4	133.25
						233.869	29.47	26.74	233.87	88.69	19.58							233.868	72.86	244.16	52.36	151.23	233.867	152.82	205.88							233.868	54.24	39.19	233.868	251.88	119.82
						234.57	32.27	33.28	234.57	93.5	27.2							234.569	72.71	219.83	41.98	187.11	234.567	90.36	149.3							234.567	53.06	44.35	234.569	234.2	89.31
						235.268	31.44	26.55	235.269	134.96	53.72							235.268	73.15	206.75	53.26	164.53	235.267	59.43	112.38							235.269	49.67	32.27	235.267	214.13	68.28
						235.969	26.74	24.98	235.969	172.59	56.65							235.968	73.02	198.1	41.93	181.32	235.97	52.56	87.43							235.968	51.22	39	235.968	200.08	54.7
						236.669	28.18	26.7	236.669	167.67	67.16							236.668	62.62	177.4	44.74	168.77	236.668	43.54	89.83							236.669	55.56	37.68	236.669	186.38	42.48
						237.369	27.05	26.5	237.369	160.05	61.36							237.37	70.62	187.46	45.78	157.4	237.368	40.65	54.97							237.368	56.53	37.54	237.368	161.19	34.18
						238.069	31.06	25.7	238.069	148.86	56.5							238.068	70.22	173.98	48.45	139.07	238.068	40.98	61.74							238.068	56.58	39	238.07	145.39	34.95
						238.769	27.72	27.83	238.769	152.26	48.35							238.768	71.66	167.96	49.75	154.19	238.768	49.89	56.55							238.768	59.25	36.11	238.769	147.37	27.16
						239.469	30.43	30.74	239.469	140.56	31.92							239.469	75.66	183.46	39.66	189.7	239.468	42.57	55.93							239.469	56.21	36.94	239.47	127.86	32.68
						240.17	29.21	28.5	240.169	150.18	29.32							240.169	78.04	172.93	50.38	164.26	240.169	47.62	46.75							240.169	56.57	35.41	240.17	119.97	34.53
						240.87	31.18	28.86	240.869	136.27	25.15							240.869	73.88	164.13	49.85	180.23	240.87	36.99	63.17							240.871	56.95	37.78	240.869	120.99	37.84
						241.57	31.38	27.19	241.568	120.54	28.81							241.569	75.65	180.17	47.76	181.81	241.569	42.9	49.96							241.57	56.33	34.37	241.571	119.15	33.47
						242.27	33.25	28.67	242.27	105.51	21.54							242.269	79.33	183.36	42.46	163.58	242.269	42.07	60.7							242.269	60.7	34.73	242.269	112.35	31.79
						242.97	29.5	25.58	242.97	102.79	27.41							242.969	64.85	171.04	48.98	168.74	242.967	55.44	50.19							242.969	51.02	34.89	242.971	115.16	33.35
						243.67	34.16	30.96	243.67	100.22	22.39							243.669	83.17	167.67	38.12	193.47	243.668	38.31	49.09							243.67	54.39	35.56	243.669	108.2	29.87
						244.371	33.64	26.86	244.37	96.14	24.86							244.368	99.53	186.11	49.06	172.02	244.368	39.66	55.28							244.37	54.86	33.63	244.367	105.07	33.23
						245.068	30.53	29.29	245.07	98.4	27.95							245.069	91.81	196.29	48.81	153.89	245.069	44.98	54.14							245.069	51.89	32.55	245.069	109.35	33.19
						245.768	31.2	33.36	245.771	95.88	19.96							245.77	77.53	170.24	44.09	155.32	245.769	50.46	48.49							245.77	53.63	36.95	245.769	106.52	28.35
						246.469	29.75	28.21	246.47	95.95	25.84							246.47	73.88	170.76	47	162.56	246.47	45.49	52.62							246.469	57.62	33.21	246.468	118.64	27.08
						247.168	29.85	34.18	247.171	85.48	26.18							247.17	65.09	175.51	45.13	186	247.168	68.62	75.06							247.171	56.24	44.33	247.169	107.77	31.34
						247.868	30.33	29.97	247.869	88.73	26.23							247.868	85.17	177.57	42.74	171.05	247.868	146.02	125.38							247.869	56.34	44.13	247.869	109.21	30.08
						248.569	32.81	29.01	248.569	90.14	28.19							248.569	107.31	180.24	41.98	160.11	248.568	187.87	203.25							248.571	51.06	38.56	248.569	125.1	34.11
						249.269	31.68	36.06	249.267	85.57	23.12							249.269	303.63	351.03	47.74	167.96	249.267	239.82	277.3							249.27	51.69	41.75	249.269	179.91	95.29
						249.97	30.35	32.7	249.969	82.53	27.05							249.97	254.42	381.57	42.24	160.63	249.969	255.98	296.19							249.97	51.08	41.48	249.968	205.83	116.11
						250.67	28.9	34.35	250.67	97.75	25.53							250.669	223.66	388.54	54.26	172.26	250.668	227.87	301.48							250.669	52.13	40.4	250.67	222.79	95.82
						251.369	30.6	33.84	251.368	88.25	28.05							251.368	210.9	324.01	42.92	184.67	251.368	193.25	245.28							251.369	54.96	42.67	251.369	224.66	93.21
						252.07	29.3	33.46	252.067	82.41	28.4							252.068	147.43	312.58	39.88	155.79	252.067	91.04	166.26							252.07	54.07	42.89	252.07	184.1	68.77
						252.768	30.59	32.8	252.769	92.84	24.57							252.768	110.86	293.31	47.85	183.51	252.769	66.17	119.22							252.77	57.61	40.43	252.768	183.45	59.27
						253.468	25.69	31.7	253.469	96.6	25.74							253.468	89.61	285.09	50.27	184.21	253.468	51.83	89.59							253.47	53.95	50.89	253.47	174.13	42.15
						254.169	27.08	30.24	254.169	89.9	26.05							254.168	83.94	276.18	47.71	182.7	254.169	50.69	89.93							254.168	55.65	53.55	254.169	156.5	32.51
						254.869	32.72	32.57	254.869	89.76	25.58							254.867	75.34	256.14	60.7	175.35	254.868	48.47	67.19							254.868	54.38	50.85	254.869	137.57	35.03
						255.57	29.12	33.85	255.569	82.31	30.6							255.568	86.42	255.2	44.63	167.75	255.567	46.89	72.36							255.569	57.36	46.57	255.569	122.2	29.12
						256.269	28.11	31.06	256.269	87.92	24.95							256.269	73.74	230.19	95.18	186.46	256.268	43.74	64.65							256.27	57.04	51.45	256.269	115.9	29.27
						256.97	33.47	29.66	256.969	99.48	25.47							256.969	81.07	233.08	51.55	179.39	256.969	45.76	59.07							256.968	51.97	44.84	256.968	116.06	26.95
						257.669	29.62	29.08	257.671	85.07	24.39							257.669	72.85	213.05	43.06	184.84	257.668	50.51	49.29							257.669	55.98	40.69	257.668	106.35	23.82
						258.371	30	35.4	258.369	86.77	26.53							258.369	69.54	186.58	49.71	171.42	258.368	44.54	46.2							258.37	55.17	41.71	258.37	108.4	28.87
						259.069	32.74	29.53	259.069	87.7	29.01							259.07	66.98	179.39	46.63	174.18	259.068	41.37	50.54							259.07	47.84	39.75	259.07	111.89	31.55
						259.77	29.29	35.83	259.77	87.93	23.18							259.769	78.6	169.25	37.42	179	259.77	53.08	48.58							259.77	49.39	39.8	259.77	109.01	32.14
						260.47	51.17	100.54	260.468	91.02	32.56							260.468	106.53	177.15	49.97	162.95	260.47	49.11	48.67							260.47	56.58	36.65	260.47	102.78	25.25
						261.171	62.89	159.91	261.17	79.03	31.26							261.168	96.69	154.21	44.48	191.53	261.171	42.8	48.28							261.17	55.04	37.62	261.17	106.87	28.85
						261.871	68.66	186.42	261.868	94.15	25.99							261.867	77.2	163.47	46.15	197.74	261.869	35.99	46.67							261.87	54.84	35.66	261.869	110.96	36.63
						262.57	71.79	194.94	262.569	93.11	27.71							262.57	71.84	151.12	97.88	190.32	262.57	43.87	53.13							262.569	55.22	42.92	262.569	114.11	30.97
						263.27	79.21	187.18	263.269	85.46	27.8							263.269	67.4	171.95	65.89	166.46	263.27	45.13	50.68							263.268	58.92	35.32	263.27	110.33	31.95
						263.97	74.81	174.3	263.968	111.52	36.58							263.97	67.56	162.44	50.45	170.25	263.97	43.83	46.54							263.969	56.5	35.44	263.968	115.76	30.49
						264.67	51.32	155.8	264.669	136.93	51.23							264.67	59.28	157.77	37.91	161.25	264.669	47.08	51.58							264.669	56.15	36.64	264.67	108.37	30.99
						265.368	41.36	130.12	265.369	163.46	64.32							265.37	63.72	150.47	47.12	157.19	265.369	49.11	45.61							265.369	57.78	39.72	265.37	103.14	27.05
						266.068	42.52	107.29	266.069	174.04	64.84							266.07	86.68	171.42	50.8	145.26	266.068	43.06	50.72							266.07	55.68	38.47	266.069	106.69	29.55
						266.769	34.37	94.63	266.769	179.85	61.62							266.771	76.95	146.19	44.04	162.77	266.768	42.06	47.32							266.771	52.31	33.72	266.769	98.65	27.9
						267.47	29.76	85.43	267.469	167.67	67.4							267.47	76.5	186.51	43	130	267.469	49.38	42.22							267.469	55.64	38.19	267.469	180.19	85.2
						268.169	31.04	70.95	268.17	172.43	56.68							268.172	66.42	164.53	45.27	164.75	268.17	41.81	35.55							268.17	49.8	37.93	268.168	223.58	112.35
						268.868	32.67	64.31	268.87	176.49	39.61							268.87	70.76	183.62	42.69	154.77	268.869	49.61	43.49							268.869	56.54	43.07	268.867	255.49	115.1
						269.568	30.76	49.77	269.57	157.5	36.66							269.57	61.86	194.16	42.67	176.46	269.567	43.49	50.84							269.57	55.32	43.21	269.569	280.19	126.91
						270.268	34.47	49.35	270.268	146.8	37.46							270.27	67.92	195.18	36.29	160.96	270.269	50.69	44.78							270.27	53.34	39.38	270.269	299.74	144.84
						270.97	26.72	42.97	270.968	132.22	33.96							270.971	82.21	205.89	38.97	178.77	270.969	42.9	46.96							270.97	52.88	48.97	270.969	305.09	123.6
						271.67	29.15	39.53	271.669	135.27	29.23							271.669	85.8	174.45	38.73	156.67	271.667	45.85	57.49							271.67	59.57	39.79	271.669	280.1	100.21
						272.37	30.08	45.23	272.369	131.54	25.44							272.368	75.74	203.55	47.57	179.84	272.369	46.03	38.55							272.37	55.04	45.51	272.368	258.22	58.9
						273.068	29.67	36.95	273.068	113.82	29.53							273.069	69.28	211.68	36.74	148.23	273.068	37.21	46							273.069	53.04	43.55	273.069	229.63	51.51
						273.769	30.21	34.24	273.769	101.23	27.29							273.769	79.72	205.46	40.11	146.72	273.768	49.28	52.57							273.769	52.35	50.02	273.768	214.45	32.76
						274.468	30.2	29.58	274.468	97.38	26.2							274.469	76.6	207.14	42.51	164.51	274.469	55.82	37.03							274.47	59.45	49.29	274.469	178.59	31.25
						275.17	27.94	35.63	275.168	101.06	27.49							275.169	77.37	194.02	40.09	171.02	275.169	39.99	45.77							275.168	57.49	49.19	275.169	167.63	31.87
						275.87	29.58	33.13	275.868	99.09	27.63							275.869	69.69	187.73	47.06	156.75	275.869	41.71	42.55							275.868	50.09	47.78	275.869	165.63	26.86
						276.568	31.79	31.08	276.569	105.15	26.56							276.57	60.85	208.58	49.01	141.96	276.568	45.16	38.87							276.569	53.5	51.43	276.568	141.16	30.28
						277.27	28.24	38.26	277.267	101.8	28.5							277.269	63.71	194.58	42.02	130.72	277.268	43.26	40.33							277.269	52.56	48.74	277.268	135.88	34.31
						277.971	33.03	30.36	277.97	96.82	23.4							277.97	91.9	218.91	43.45	163.26	277.969	40.43	49.91							277.968	55.68	48.14	277.969	127.49	32.48
						278.669	27.94	30.89	278.67	90.54	23.85							278.669	95.18	198.81	42.58	162.25	278.669	41.84	44.33							278.67	54.2	48.78	278.668	124.66	29.29
						279.37	34.3	30.89	279.369	82.43	21.45							279.369	76.21	222.51	40.75	142.56	279.368	45.13	39.93							279.369	51.76	47.27	279.369	116.57	28.46
						280.068	28.59	28.03	280.07	89.18	27.7							280.068	75.87	232.4	41.31	147.63	280.068	45.57	47.74							280.07	56.67	40.84	280.069	113.89	24.95
						280.768	29.33	29.38	280.77	88.63	23.48							280.768	89.56	254.73	46.91	152.61	280.768	48.75	59.09							280.77	57.33	41.32	280.769	108.67	29.47
						281.47	26.92	34.92	281.47	81.24	25.01							281.469	86.41	241.46	39.49	157.39	281.468	78.18	95.58							281.47	52.68	50.29	281.469	115.62	31.92
						282.17	30.2	29.8	282.17	79.61	28.51							282.17	73.28	235.6	49.46	155.47	282.17	143.09	142.81							282.17	54.61	55.68	282.169	104.41	30.75
						282.87	30.48	35.05	282.87	93.3	25.27							282.869	64.88	216.5	40.66	164.18	282.87	157.58	177.8							282.87	51.82	47.13	282.869	104.44	31.7
						283.568	31.23	30.58	283.571	88.08	24.35							283.569	73.75	230.62	48.26	165.28	283.569	218.6	254.41							283.57	57.73	40.04	283.57	102.13	27.13
						284.271	32.59	27.8	284.27	93.82	25.37							284.269	74.24	226.62	40.12	160.05	284.269	199.15	303.16							284.268	51.35	40.42	284.27	102.26	29.31
						284.97	29.82	28.64	284.971	91.19	24.84							284.971	172.53	270.12	41.58	157.54	284.968	148.02	236.99							284.969	56.48	47.85	284.969	154.35	62.93
						285.67	32.87	32.89	285.671	86.55	31.8							285.669	356.5	520.5	44.51	146.54	285.67	91.27	180.28							285.669	53.35	51.95	285.669	198.17	114.11
						286.368	29.24	34.02	286.371	81.81	31.38							286.369	331.61	585.36	44.79	154.84	286.37	56.19	121.84							286.369	57.47	47.83	286.369	261.92	118.62
						287.07	29.96	24.94	287.069	85.11	24.11							287.069	360.59	678.36	47.25	143.88	287.069	51.17	114.7							287.069	54.24	50.83	287.068	270.01	108.33
						287.768	25.79	25.19	287.771	80.69	28.71							287.771	312.6	688.53	59.42	142	287.769	40.01	95.38							287.769	57.04	50.48	287.768	246.7	96.13
						288.47	28.27	27.58	288.471	91.43	28.64							288.47	313.07	719.46	36.7	160.33	288.47	60.18	62.8							288.469	55.88	56.24	288.469	234.34	66.33
						289.169	28.45	30.12	289.17	101.27	32.29							289.169	281.53	623.01	42.22	150.39	289.168	55.13	54.93							289.169	58.11	47.67	289.167	208.78	54.23
						289.868	31.89	28	289.87	127.11	61.42							289.879	231.85	513.28	45.58	151.46	289.867	54.33	56.2							289.869	52.23	42.38	289.868	193.01	39.85
						290.569	31.74	28.15	290.568	142.7	57.77							290.568	161.38	464.13	45.58	131.96	290.568	64.72	50.17							290.57	51.16	45.55	290.567	177.98	35.79
						291.272	29.38	30.56	291.27	163.52	69.12							291.27	103.05	441.08	43.06	160.4	291.268	64.58	51.88							291.269	49.53	43.24	291.267	148.07	32.32
						291.972	27.5	26.71	291.968	158.8	59.73							291.969	76.47	366.38	39.48	155.18	291.968	48.84	41.9							291.969	51.2	45.56	291.969	147.77	32.29
						292.669	31.88	28.57	292.671	145.75	58.92							292.669	65.86	320.35	40.55	149.07	292.667	59.34	43.57							292.669	50.66	50.12	292.669	144.79	32.88
						293.369	30.68	29.8	293.37	136.37	49.37							293.368	66.79	259.13	44.49	154.96	293.369	52.72	42.45							293.369	56.45	49.09	293.368	125.09	29.18
						294.068	29.33	26.8	294.069	141.62	38.95							294.07	70.09	254.02	50.34	152.65	294.068	56.92	50.41							294.07	49.83	46.77	294.068	126.7	30.51
						294.768	28.4	28.55	294.768	135.24	35.81							294.769	70.09	215.69	45.2	166.26	294.77	54.74	42.14							294.77	56.39	46.58	294.768	122.87	33.85
						295.468	31.73	28.75	295.47	134.07	27.16							295.469	78.55	216.79	46.15	161.12	295.469	55.84	42.65							295.47	55.97	44.46	295.468	116.17	30.18
						296.17	28.69	30.18	296.169	120.31	27.58							296.169	73.31	221.95	50.27	163.18	296.169	50.15	47							296.169	51.68	42.19	296.169	111.77	29.49
						296.87	26.47	28.97	296.869	114.77	24.31							296.869	71.88	203.78	44.03	146.63	296.867	52.89	41.8							296.869	54.45	48.75	296.867	118.05	26.97
						297.568	28.39	27.33	297.568	113.36	22.84							297.57	68.31	188.71	34.44	193.61	297.569	52.56	33.8							297.569	52.14	43.64	297.569	116.64	29.89
						298.27	32.51	26.99	298.269	105.78	24.96							298.264	65.74	195.13	38.4	172.28	298.269	50.51	43.68							298.269	55.99	45.89	298.269	116.59	32.08
						298.97	28.93	32.04	298.969	102.47	27.54							298.965	61.55	175.73	38.45	182.4	298.968	51.04	54.91							298.969	55.62	38.81	298.968	115.94	32.48
						299.67	29.48	31.12	299.669	117.9	23.74							299.669	107.97	205.03	43.82	181.89	299.668	74.98	90.2							299.669	49.47	42.14	299.668	115.12	28.54
