# Supplementary material for: The gut contractile organoid for studying the gut motility regulated by coordinating signals between interstitial cells of Cajal and smooth muscles
Source: eLife. 2025 Aug 22;13:RP97860. doi: 10.7554/eLife.97860 (PMC12373395; doi:10.7554/eLife.97860)
Supplement: Figure 6—source data 1. [file elife-97860-fig6-data1.xlsx]

## Sheet: Fig6A-timelapse
Before		Bleb5uM		Bleb10uM
Time [s]	#1 (TD)	Time [s]	#1 (TD)	Time [s]	#1 (TD)
0	241.3	0	213.77	0	296.97
1.182	241.77	1.18	214.08	1.182	296.58
2.35	241.47	2.348	213.8	2.349	296.37
3.518	241.55	3.516	213.98	3.518	296.54
4.687	241.32	4.685	214.48	4.684	296.74
5.855	240.93	5.853	216.44	5.852	297.2
7.023	240.26	7.021	216.5	7.024	297.61
8.192	240.19	8.189	215.49	8.192	296.67
9.36	240.82	9.357	216.22	9.36	297.39
10.528	240.71	10.525	215.15	10.532	297.55
11.696	241.03	11.693	215.21	11.7	297.41
12.864	240.87	12.86	214.39	12.869	297.71
14.032	240.69	14.029	213.98	14.036	297.54
15.201	240.52	15.197	214.51	15.204	297.68
16.369	241.14	16.365	214.85	16.373	297.65
17.538	240.35	17.533	214.32	17.541	298.04
18.706	240.53	18.701	214.61	18.709	297.58
19.872	240.03	19.869	214.45	19.877	297.8
21.04	240.51	21.038	215.15	21.045	298.36
22.208	240.29	22.205	217.2	22.214	298.44
23.375	239.9	23.374	215.63	23.382	298.63
24.544	247.64	24.542	215.96	24.55	298.62
25.712	254.97	25.71	215.92	25.718	298.75
26.88	254.31	26.879	214.95	26.885	299.02
28.048	250.74	28.047	214.88	28.053	299.11
29.216	248.89	29.213	215.37	29.221	299.47
30.384	247.48	30.381	214.56	30.389	299.66
31.552	245.5	31.549	214.97	31.558	299.72
32.72	243.96	32.715	214.05	32.724	300
33.889	242.47	33.883	215.21	33.892	300.32
35.057	242.53	35.055	214.58	35.061	300.42
36.226	241.72	36.225	215.07	36.228	300.54
37.394	241.62	37.394	213.89	37.397	300.87
38.56	240.89	38.56	213.51	38.565	301.32
39.728	241.9	39.728	213.48	39.733	301.27
40.896	241.33	40.895	215.05	40.901	301.41
42.064	241.15	42.063	215.13	42.069	301.72
43.233	240.29	43.231	214.27	43.237	301.93
44.4	240.18	44.399	214.25	44.405	302.24
45.569	239.83	45.567	215.7	45.572	302.7
46.735	239.92	46.734	214.71	46.74	303.03
47.903	240.93	47.902	214.14	47.908	302.68
49.071	240.31	49.07	213.64	49.076	303.2
50.239	240.35	50.238	213.68	50.244	303.41
51.406	240.96	51.406	213.51	51.412	303.75
52.575	240.85	52.574	212.45	52.58	303.79
53.742	241.11	53.74	212.9	53.748	303.89
54.91	241.33	54.908	218.38	54.916	303.84
56.076	240.29	56.075	221.59	56.085	303.77
57.244	239.55	57.242	220.64	57.254	304.16
58.412	239.88	58.41	216.98	58.422	304.3
59.58	238.73	59.578	215.92	59.59	304.7
60.749	239	60.746	214.82	60.758	304.37
61.918	239.14	61.914	217.55	61.926	304.81
63.085	239.13	63.084	215.1	63.094	305.44
64.253	238.89	64.252	214.03	64.262	305.59
65.421	238.22	65.423	213.25	65.43	305.56
66.589	238.3	66.59	215.79	66.598	305.97
67.757	238.19	67.759	215.21	67.765	306.36
68.925	238.9	68.927	217.59	68.933	306.16
70.093	238.57	70.095	222.09	70.101	306.47
71.262	238.03	71.263	220.24	71.269	306.42
72.429	238.03	72.431	217.85	72.437	306.72
73.597	237.38	73.599	216.46	73.605	307.15
74.765	236.85	74.767	215.76	74.773	307.22
75.933	237.58	75.934	215.11	75.942	307.3
77.101	237.97	77.103	217.01	77.11	307.55
78.269	238.72	78.271	219.69	78.278	307.83
79.438	237.86	79.437	218.35	79.446	307.71
80.607	237.23	80.605	217.16	80.614	307.92
81.775	237.38	81.773	215.7	81.782	308.41
82.943	237.51	82.941	215.48	82.95	308.8
84.111	237.3	84.109	214.67	84.118	308.81
85.278	237.6	85.276	214.56	85.287	309.37
86.446	237.15	86.447	215.87	86.454	309.79
87.614	236.61	87.615	216.85	87.622	309.82
88.783	237.13	88.783	216.06	88.79	310.11
89.952	237.21	89.951	215.35	89.958	310.11
91.12	239.79	91.117	216.78	91.126	310.14
92.29	246.72	92.285	218.07	92.294	311.02
93.456	251.86	93.453	216.91	93.462	310.76
94.622	254.65	94.62	215.11	94.63	311.51
95.791	253.49	95.79	215.29	95.799	311.66
96.96	249.91	96.958	219.81	96.966	312.18
98.129	247.02	98.123	220.64	98.135	312.24
99.298	244.09	99.291	217.84	99.303	312.71
100.466	242.24	100.46	215.89	100.471	312.8
101.634	242.21	101.628	214.88	101.639	313.61
102.802	241.05	102.795	216.54	102.808	313.99
103.97	239.98	103.964	216.53	103.977	314.3
105.139	239.8	105.132	215.87	105.145	314.76
106.306	239.39	106.3	215.88	106.313	315.13
107.474	239.53	107.468	215.9	107.481	315.23
108.642	239.12	108.637	217.49	108.649	315.47
109.81	239.36	109.805	216.86	109.817	316.24
110.978	239.47	110.973	215.88	110.983	316.48
112.146	239.11	112.141	215.49	112.151	316.68
113.314	238.27	113.309	214.84	113.32	316.95
114.483	238.52	114.477	219.85	114.488	317.63
115.65	238.3	115.643	221.06	115.656	317.53
116.818	238.35	116.811	216.84	116.824	318.28
117.986	238.44	117.979	215.36	117.992	318.32
119.154	238.41	119.147	214.01	119.16	318.61
120.322	238.03	120.315	213.84	120.328	319.21
121.49	238.69	121.483	214.82	121.496	319.52
122.658	238.91	122.652	214.2	122.664	320.1
123.827	238.65	123.82	213.57	123.832	320.09
124.994	239.18	124.988	212.79	125	320.45
126.162	238.61	126.156	214.02	126.168	320.8
127.33	237.57	127.325	217.89	127.336	321.09
128.498	237.46	128.491	216.82	128.505	321.35
129.666	237.83	129.659	215.82	129.673	322
130.834	238.53	130.827	215.53	130.841	322.16
132.002	238.59	131.995	214.93	132.009	322.62
133.17	237.77	133.163	219.03	133.177	322.92
134.337	237.84	134.331	221.43	134.345	323.35
135.506	238.31	135.499	219.55	135.513	323.44
136.674	238.35	136.665	216.88	136.681	323.75
137.842	237.23	137.833	215.22	137.85	323.98
139.01	242.75	139.002	215.39	139.017	324.33
140.178	252.32	140.169	216.86	140.186	324.55
141.346	254.55	141.337	220.12	141.354	324.87
142.514	256.54	142.505	220.35	142.522	325.43
143.681	253.83	143.673	217.55	143.69	325.34
144.85	249.95	144.841	215.61	144.858	325.69
146.018	247.32	146.009	215.37	146.026	325.88
147.186	245.32	147.176	214.84	147.195	325.96
148.354	242.68	148.345	214.89	148.362	326.39
149.522	241.8	149.512	214.05	149.53	326.88
150.688	241.16	150.68	212.72	150.698	326.85
151.857	240.6	151.848	213.67	151.866	327.1
153.024	241.2	153.016	212.76	153.034	327.43
154.191	240.26	154.184	212.2	154.202	327.59
155.359	239.41	155.352	211.57	155.37	327.87
156.527	239.7	156.52	211.8	156.539	327.64
157.695	239.27	157.689	216.22	157.706	328.03
158.863	239.21	158.856	219.46	158.874	328.21
160.031	238.9	160.024	216.2	160.042	328.67
161.199	243.07	161.193	217.45	161.21	328.54
162.367	249.35	162.359	214.64	162.378	328.86
163.535	252.7	163.527	213.74	163.546	329.04
164.703	253.53	164.695	214.29	164.714	328.92
165.871	252.6	165.863	218.74	165.883	329.44
167.042	249.46	167.032	221.01	167.05	329.14
168.208	245.94	168.199	219.5	168.218	328.96
169.376	244.25	169.367	215.96	169.386	332.97
170.545	243.04	170.535	214.81	170.552	333.18
171.713	241.72	171.705	214.16	171.72	333.09
172.881	240.86	172.873	218.8	172.888	333.26
174.049	239.88	174.041	221.53	174.055	333.51
175.216	239.68	175.209	219.15	175.224	333.93
176.385	240.18	176.378	215.58	176.391	333.52
177.554	239.91	177.545	214.71	177.559	333.65
178.72	238.73	178.713	213.39	178.728	333.91
179.888	238.69	179.881	212.54	179.896	333.74
181.056	238.87	181.049	218.99	181.064	333.98
182.224	239.46	182.217	219.21	182.232	334.27
183.392	238.57	183.385	216.72	183.4	334.15
184.56	238.4	184.552	214.74	184.569	334.17
185.728	238.1	185.721	212.67	185.736	334.54
186.897	238.12	186.889	211.78	186.904	334.44
188.066	237.96	188.057	211.52	188.072	334.66
189.234	237.52	189.225	216.97	189.24	334.48
190.402	237.84	190.393	218.64	190.408	334.45
191.57	237.35	191.561	219.04	191.576	334.68
192.738	238.37	192.729	217.22	192.744	334.74
193.906	238.03	193.897	213.56	193.913	335.11
195.074	237.77	195.066	212.3	195.081	334.6
196.241	237.59	196.234	212.01	196.249	334.79
197.407	237.6	197.402	216.34	197.418	335.01
198.576	237.08	198.57	219.17	198.586	334.97
199.744	236.93	199.737	218.75	199.755	335.19
200.912	237.53	200.905	216.54	200.923	335.53
202.08	237.52	202.073	214.09	202.091	335.07
203.248	237.19	203.241	212.17	203.26	334.98
204.416	237.36	204.41	211.53	204.428	335.35
205.583	237.46	205.578	211.77	205.596	335.37
206.752	237.43	206.746	212.26	206.764	335.63
207.921	237.68	207.914	212.53	207.932	335.35
209.089	237	209.08	212.49	209.101	335.44
210.257	237.63	210.248	212	210.269	335.57
211.425	237.14	211.414	211.81	211.437	335.51
212.593	242.84	212.582	211.12	212.606	335.85
213.761	251.27	213.75	215.75	213.774	335.31
214.928	255.05	214.918	217.52	214.942	336.12
216.095	256.06	216.086	218	216.11	335.87
217.263	253.84	217.254	215.81	217.278	336.24
218.431	250.96	218.421	213.66	218.447	336.35
219.599	248.86	219.59	211.96	219.614	336.33
220.767	246.26	220.758	217.21	220.782	336.53
221.935	246.84	221.926	219.13	221.95	336.76
223.103	244.61	223.094	216.97	223.118	336.61
224.27	243.17	224.262	214.63	224.286	337.19
225.439	242.12	225.43	211.88	225.454	336.74
226.607	240.52	226.599	211.22	226.622	336.65
227.776	239.94	227.766	211.11	227.79	336.73
228.944	240.22	228.935	213.82	228.958	336.69
230.112	239.38	230.102	216.47	230.125	336.77
231.28	239.02	231.269	217.03	231.293	336.89
232.448	238.74	232.438	214.68	232.463	337.07
233.615	240.08	233.606	211.86	233.631	337.28
234.784	239.87	234.774	210.97	234.799	337.06
235.952	239.91	235.942	217.23	235.966	336.89
237.12	239.56	237.11	218.59	237.134	336.62
238.288	239.14	238.279	216.11	238.301	336.93
239.456	239.19	239.446	213.76	239.468	336.95
240.624	239.23	240.614	211.71	240.636	337.04
241.794	238.98	241.782	210.52	241.804	337.1
242.961	238.31	242.95	210.19	242.972	337.28
244.13	237.54	244.118	210.71	244.14	337.05
245.298	238.49	245.286	210.5	245.308	337.38
246.466	239.54	246.453	210.53	246.477	337.32
247.634	238.83	247.622	210.51	247.644	337.04
248.802	238.93	248.789	211	248.811	337.41
249.97	242.65	249.956	217.21	249.979	337.57
251.138	249.48	251.124	218.98	251.147	337.34
252.305	254.4	252.292	218.49	252.315	337.65
253.472	255.82	253.466	214.92	253.483	337.59
254.64	253.68	254.634	213.59	254.651	337.41
255.808	251.28	255.802	211.6	255.82	337.37
256.979	247.71	256.971	210.55	256.987	337.27
258.148	244.93	258.138	210.76	258.154	337.7
259.316	243.13	259.306	210.9	259.322	337.67
260.484	242.26	260.475	210.85	260.49	337.25
261.65	242.41	261.643	209.33	261.662	337.57
262.818	243.23	262.811	211.82	262.832	337.28
263.986	241.72	263.979	217.46	264	337.31
265.154	241.79	265.146	218.75	265.168	337.09
266.322	240.83	266.315	218.15	266.335	337.1
267.491	240.04	267.482	214.97	267.502	337.29
268.658	240.81	268.65	214.37	268.67	337.09
269.826	239.95	269.818	212.5	269.838	337.22
270.993	239.54	270.986	211.41	271.006	337.13
272.161	239.49	272.154	211.92	272.174	337.24
273.329	239.67	273.322	217.55	273.342	337.34
274.497	240.21	274.488	218.34	274.51	337.09
275.666	239	275.657	217.41	275.677	336.81
276.835	238.57	276.824	214.04	276.845	336.96
278.002	240.53	277.992	212.86	278.013	337.22
279.17	247.48	279.16	211.53	279.181	337.38
280.336	254.4	280.327	211.01	280.35	337.43
281.504	255.64	281.495	210.6	281.518	337.55
282.672	256.34	282.663	210.74	282.686	337.13
283.84	252.29	283.829	211.32	283.855	336.98
285.009	249.01	284.997	210.97	285.021	337.21
286.177	246.1	286.165	210.93	286.189	336.65
287.343	243.46	287.333	211.48	287.357	337.08
288.512	242.44	288.501	211.63	288.527	337.17
289.681	241.29	289.669	210.68	289.696	337.15
290.849	240.66	290.838	210.82	290.865	337.8
292.017	241.9	292.007	211.07	292.033	337.57
293.183	241.16	293.173	211.84	293.201	337.4
294.351	240.48	294.341	217.13	294.368	337.59
295.52	239.74	295.509	220.52	295.536	337.81
296.687	238.41	296.677	220.88	296.704	337.74
297.856	238.74	297.845	218.64	297.871	337.9
299.023	238.96	299.013	215.44	299.039	337.58
300.191	238.98	300.182	214.49	300.208	337.76
301.361	240.33	301.351	213.21	301.376	338.01
302.529	240.19	302.519	212.66	302.544	337.73
303.697	239.46	303.688	213.87	303.712	338.46
304.865	240.72	304.856	218.54	304.88	338.14
306.032	240.16	306.024	217.36	306.048	338.38
307.201	239.96	307.192	214.83	307.216	338.21
308.369	239.82	308.36	214.13	308.384	338.44
309.537	240.09	309.528	213.37	309.553	338.31
310.705	239.36	310.697	211.17	310.72	338.27
311.873	239.42	311.865	210.74	311.888	338.12
313.045	238.9	313.033	210.89	313.056	338.44
314.214	241.07	314.201	210.71	314.224	338.62
315.381	238.99	315.369	211.27	315.392	338.78
316.55	238.62	316.537	211.13	316.56	338.6
317.718	239.81	317.705	210.38	317.729	338.37
318.886	239.71	318.873	215.45	318.898	338.9
320.054	238.58	320.041	219.82	320.067	338.97
321.222	238.49	321.207	220.99	321.236	339.09
322.39	238.79	322.375	218.15	322.404	338.61
323.558	239.12	323.545	214.69	323.572	339.01
324.725	239.42	324.713	213.9	324.74	338.88
325.894	238.93	325.881	213.02	325.908	338.41
327.062	238.85	327.049	211.37	327.077	338.16
328.23	239.27	328.218	211.05	328.246	338.23
329.399	239.32	329.387	210.04	329.414	338.49
330.567	238.92	330.554	210.31	330.583	338.34
331.735	238.57	331.722	210.23	331.751	338.31
332.903	238.29	332.89	210.63	332.919	338.17
334.072	238.95	334.058	213.33	334.087	338.21
335.24	238.87	335.226	216.79	335.255	338.16
336.408	238.92	336.394	219.33	336.423	338.54
337.576	238.47	337.563	216.53	337.592	338.25
338.744	244.15	338.732	214.7	338.761	338.21
339.912	252.35	339.899	213.69	339.93	338.19
341.08	255.91	341.067	212.57	341.098	338.05
342.248	257.67	342.235	211.67	342.264	338.13
343.415	255.94	343.403	210.58	343.432	337.98
344.583	252.46	344.571	212.4	344.598	338.11
345.751	249.27	345.739	217.8	345.766	338.06
346.919	246.68	346.908	220.84	346.935	338.27
348.087	245.5	348.077	217.02	348.104	337.96
349.254	245.38	349.244	214.99	349.272	337.89
350.422	243.4	350.412	213.92	350.44	338.04
351.59	241.68	351.58	212.55	351.608	338.3
352.758	241.62	352.748	212.45	352.776	338.24
353.926	240.91	353.916	214.06	353.945	338.24
355.092	239.88	355.084	213.81	355.113	338.14
356.258	242.29	356.252	213.45	356.282	338.12
357.426	243.75	357.422	212.64	357.449	338.36
358.593	244.25	358.59	210.7	358.617	338.14
359.762	243.28	359.758	210.97	359.785	338.37
360.931	241.48	360.926	210.75	360.953	338.63
362.099	240.79	362.094	210.92	362.121	338.27
363.267	240.65	363.262	210.2	363.289	338.44
364.435	240.66	364.43	211.04	364.457	338.25
365.603	239.12	365.598	215.84	365.626	338.08
366.771	238.5	366.767	218.21	366.795	338.11
367.938	238.35	367.935	220.82	367.963	337.97
369.107	238.94	369.103	218.36	369.131	338.06
370.276	244.66	370.271	215.79	370.299	338.43
371.444	250.08	371.439	213.09	371.468	338.39
372.612	252.78	372.607	212.02	372.636	338.06
373.78	251.42	373.775	211.91	373.804	338.37
374.948	248.11	374.944	211.25	374.972	338.43
376.116	245.29	376.112	210.89	376.14	338.29
377.284	243.39	377.278	210.49	377.308	337.83
378.453	242.08	378.446	210.29	378.476	338.33
379.622	242.57	379.614	213.11	379.644	338.12
380.792	240.79	380.781	218.95	380.815	338.3
381.96	239.66	381.95	221.43	381.982	338.59
383.126	239.53	383.118	218.36	383.15	338.19
384.294	238.62	384.286	215.23	384.318	338.14
385.463	238.45	385.454	212.5	385.486	338.29
386.63	238.9	386.622	212.15	386.654	338.43
387.799	239.7	387.79	211.36	387.822	338.27
388.968	239.16	388.958	210.6	388.99	338.59
390.136	238.39	390.125	209.54	390.159	338.52
391.306	238.68	391.298	209.29	391.326	339.04
392.474	238.92	392.465	209.43	392.494	338.82
393.642	239.36	393.633	210.61	393.662	338.35
394.81	238.42	394.801	215.87	394.83	338.65
395.978	239.42	395.969	219.56	395.998	338.98
397.146	239.17	397.137	220.04	397.166	338.72
398.315	239.15	398.305	217.2	398.334	339.43
399.483	238.88	399.473	214.72	399.502	339.17
400.651	238.2	400.641	212.46	400.669	339.11
401.819	238.88	401.812	211.73	401.838	339.07
402.987	238.99	402.98	211.04	403.006	339.42
404.155	238.9	404.152	210.37	404.174	339.52
405.322	238.71	405.32	209.74	405.342	339.47
406.491	239.12	406.488	210.35	406.51	339.47
407.659	238.74	407.656	210.18	407.678	339.41
408.827	238.63	408.823	209.57	408.846	339.32
409.995	239.42	409.992	209.64	410.013	339.23
411.163	239.68	411.159	209.74	411.179	339.09
412.331	239.58	412.328	209.45	412.348	339.76
413.499	238.59	413.496	209.71	413.516	339.6
414.666	237.69	414.666	210.11	414.684	339.71
415.835	238.09	415.836	210.62	415.852	339.82
417.003	239.15	417.006	209.79	417.018	340.03
418.171	238.4	418.178	211.24	418.187	340.6
419.339	237.36	419.346	215.47	419.354	339.89
420.508	237.02	420.513	219.75	420.523	340.27
421.676	237.52	421.681	220.35	421.691	340.46
422.844	237.22	422.848	218.04	422.858	339.85
424.011	237.29	424.016	215.22	424.026	340.22
425.179	238.42	425.185	213.24	425.194	340.36
426.347	237.83	426.353	211.94	426.362	340.51
427.515	237.68	427.521	211.48	427.53	340.38
428.683	237.53	428.69	210.7	428.697	340.08
429.85	237.31	429.857	209.01	429.866	340.23
431.019	237.4	431.022	208.84	431.034	340.4
432.187	236.96	432.19	209.72	432.202	340.76
433.353	236.85	433.357	209.93	433.37	340.62
434.521	238.13	434.525	210.71	434.538	340.77
435.689	237.32	435.693	210.41	435.706	340.59
436.857	237.48	436.86	209.7	436.874	340.73
438.025	237.31	438.029	209.18	438.041	340.68
439.192	237.59	439.195	209.74	439.21	340.43
440.36	236.99	440.363	210.43	440.378	340.47
441.528	237.29	441.531	212.13	441.546	340.71
442.696	237.12	442.699	215.89	442.715	340.54
443.864	237.64	443.867	218.8	443.883	340.71
445.032	237.38	445.035	219.66	445.051	340.6
446.198	236.89	446.203	217.27	446.219	340.45
447.366	237.35	447.372	214.62	447.387	340.12
448.534	237.89	448.542	212.55	448.554	340.31
449.703	237.12	449.708	212.05	449.722	340.41
450.872	236.81	450.876	210.93	450.889	340.32
452.042	236.59	452.048	210.65	452.058	340.17
453.21	236.7	453.216	209.88	453.227	340.17
454.382	236.39	454.386	209.27	454.393	339.76
455.55	236.38	455.554	208.43	455.563	340.21
456.718	236.72	456.723	209.96	456.73	339.98
457.886	236.47	457.892	210.39	457.898	340.07
459.057	236.12	459.06	210.1	459.066	339.9
460.226	236.33	460.228	208.82	460.234	339.76
461.393	236.54	461.395	208.71	461.403	339.97
462.561	236.56	462.563	208.65	462.572	339.7
463.729	236.29	463.732	208.87	463.74	339.49
464.895	235.86	464.9	211.35	464.908	339.57
466.063	236.85	466.069	215.85	466.079	339.62
467.23	236.35	467.237	219.34	467.251	339.73
468.399	237.01	468.405	219.58	468.419	340.21
469.568	236.08	469.573	216.1	469.587	339.45
470.734	236.26	470.741	214.21	470.755	339.71
471.904	236.11	471.909	211.82	471.924	339.44
473.072	235.71	473.077	210.89	473.091	339.67
474.24	235.8	474.245	209.6	474.259	339.75
475.408	235.25	475.413	209.21	475.425	339.48
476.575	235.18	476.579	208.84	476.593	339.62
477.744	236	477.747	208.89	477.761	339.81
478.913	235.59	478.915	208.82	478.931	339.46
480.08	235.77	480.083	209.18	480.099	339.49
481.248	235.2	481.252	208.7	481.268	338.76
482.416	235.08	482.423	208.19	482.436	338.99
483.584	235.13	483.591	207.91	483.604	339.24
484.752	235.66	484.759	208.24	484.771	339.03
485.92	235.73	485.927	212.29	485.937	339.06
487.088	236.4	487.095	217.19	487.105	338.9
488.257	235.67	488.263	219.89	488.273	338.98
489.425	235.37	489.431	218.95	489.441	338.53
490.593	234.62	490.598	215.95	490.61	338.87
491.761	234.86	491.767	214	491.777	338.85
492.929	234.82	492.934	212.43	492.946	338.92
494.097	234.71	494.102	210.16	494.112	339.02
495.263	234.48	495.27	210.01	495.28	338.8
496.43	234.89	496.438	209.53	496.448	338.72
497.599	235.21	497.606	209.12	497.62	338.32
498.767	244.01	498.774	208.77	498.789	338.28
499.935	251.58	499.941	208.95	499.957	338.24
501.103	253.28	501.11	208.48	501.124	338.85
502.27	255.74	502.279	208.34	502.293	338.56
503.438	253.24	503.448	208.27	503.461	337.96
504.604	248.13	504.616	207.67	504.629	338.22
505.772	245.69	505.782	208.23	505.797	338.31
506.941	244.09	506.95	211.65	506.965	338.25
508.109	242.71	508.118	215.47	508.133	338.2
509.277	240.62	509.286	218.6	509.302	338.67
510.445	238.76	510.455	218.31	510.469	338.79
511.612	238.8	511.622	217.2	511.638	338.71
512.78	238.58	512.79	214.18	512.806	338.82
513.948	238.29	513.958	212.04	513.973	338.39
515.116	237.93	515.126	210.93	515.141	338.51
516.284	238.26	516.298	210.1	516.309	338.6
517.452	238.06	517.466	210.08	517.477	338.23
518.62	238.16	518.634	209.75	518.645	338.05
519.792	238.5	519.805	209.2	519.812	338.64
520.959	238.24	520.972	208.96	520.98	338.6
522.128	237.62	522.14	208.4	522.148	338.53
523.296	237.71	523.308	208.18	523.316	338.47
524.464	238.25	524.476	208.24	524.484	338.25
525.632	238.06	525.644	207.93	525.652	339.02
526.8	237.94	526.812	208.06	526.82	338.31
527.968	238.44	527.98	208.9	527.988	338.31
529.136	238.11	529.149	208.4	529.155	338.54
530.304	238.36	530.316	207.83	530.323	339.23
531.473	237.87	531.484	207.91	531.491	338.45
532.64	238.35	532.652	208.38	532.658	338.74
533.808	238.49	533.819	208.66	533.827	338.69
534.976	238.78	534.987	212.75	534.995	338.46
536.144	238.27	536.155	217.85	536.163	338.98
537.312	238.02	537.323	220.07	537.331	338.99
538.48	237.76	538.491	219.11	538.498	339.02
539.648	238.48	539.659	217.1	539.666	338.82
540.817	237.91	540.827	213.79	540.834	338.98
541.984	237.63	541.995	212.16	542.002	338.81
543.152	237.6	543.162	211.02	543.17	338.98
544.32	238.22	544.333	210.49	544.337	338.63
545.488	237.99	545.501	209.83	545.506	339.06
546.656	237.87	546.669	209.76	546.674	338.87
547.824	238.3	547.838	209.35	547.841	338.75
548.991	237.67	549.006	209.16	549.009	338.6
550.16	243.63	550.174	208.93	550.177	339.07
551.327	249.63	551.342	208.88	551.345	338.77
552.493	253.37	552.509	208.93	552.513	339.21
553.661	255.52	553.678	211.42	553.68	339.04
554.832	254.06	554.845	215.92	554.849	338.9
556	249.55	556.013	218.35	556.015	338.74
557.168	247.67	557.181	218.73	557.183	339.05
558.335	247.24	558.349	216.84	558.351	338.8
559.504	245.58	559.517	213.85	559.519	338.66
560.67	242.11	560.685	212.3	560.687	339.23
561.838	241.15	561.852	211.26	561.856	339.34
563.006	239.84	563.021	210.19	563.024	338.91
564.174	239.75	564.188	209.78	564.193	339.12
565.342	239.62	565.356	209	565.361	338.99
566.51	239.78	566.525	208.57	566.529	339.13
567.677	245.1	567.693	209.11	567.697	339.06
568.846	249.26	568.861	213.01	568.865	339.09
570.013	252.91	570.029	217.98	570.033	339.2
571.181	253.85	571.195	218.5	571.202	339.07
572.35	253.82	572.363	218.08	572.369	339.19
573.518	249.7	573.53	216.44	573.538	339.02
574.686	247.66	574.699	214.39	574.705	338.99
575.854	245.45	575.867	212.17	575.873	339.03
577.022	243.9	577.035	211.33	577.041	339.15
578.191	243.02	578.203	209.84	578.209	339.03
579.358	241.32	579.371	209.9	579.377	339.06
580.526	240.53	580.539	209.53	580.545	338.75
581.694	239.61	581.708	209.13	581.716	339.06
582.862	239.51	582.875	209.1	582.885	338.81
584.03	241.21	584.048	208.83	584.056	338.68
585.198	239.76	585.216	208.37	585.224	338.54
586.366	238.79	586.384	208.6	586.392	338.9
587.534	238.37	587.554	208.99	587.564	338.72
588.7	237.33	588.722	208.94	588.732	338.69
589.868	239.41	589.888	211.04	589.901	338.68
591.036	239.91	591.057	215.08	591.068	338.43
592.204	238.62	592.224	218.84	592.239	338.46
593.373	238.23	593.391	218.84	593.408	338.89
594.545	237.91	594.559	217.59	594.576	338.47
595.713	237.43	595.727	215.2	595.744	338.44
596.882	236.95	596.895	212.39	596.912	338.99
598.05	236.46	598.063	211.28	598.08	338.66
599.218	237.66	599.231	210.46	599.248	338.75

## Sheet: Fig6B-timelapse
Ctrl					Bleb5uM			Bleb10uM					Washout
Time[s]	#1 (EGFP)	Time [s]	#1 (EGFP)	#2 (EGFP)	Time [s]	#1 (EGFP)	#2 (EGFP)	Time[s]	#1 (EGFP)	Time [s]	#1 (EGFP)	#2 (EGFP)	Time[s]	#1 (EGFP)	Time [s]	#1 (EGFP)	#2 (EGFP)
0.066	228.31	0.065	58.9	64.26	0.064	81.98	85.14	0.065	273	0.065	101.02	109.65	0.064	523.42	0.066	94.56	71
0.694	229.96	1.241	56.98	64.08	1.242	63.21	72.06	0.695	267.75	1.241	105.24	106.98	0.692	463.53	1.244	59.64	53.87
1.314	234.27	2.411	63.9	65.64	2.41	54.62	67.47	1.316	267.21	2.409	105.31	107.6	1.313	413.38	2.414	45.87	45.87
1.934	230.76	3.581	174.23	66.98	3.578	51.72	64.77	1.937	265.27	3.577	100.21	106.36	1.935	372.87	3.586	39.05	42.79
2.555	231.86	4.753	148.33	72.34	4.747	48.86	65.34	2.554	272.58	4.749	102.44	106.84	2.556	342.33	4.756	37.56	39.68
3.175	230.33	5.921	186.01	71.75	5.914	49.09	68.95	3.175	283.08	5.919	107.71	107.97	3.176	318.2	5.924	35.62	39.11
3.795	229.89	7.089	138.97	69	7.083	49.41	73.78	3.794	283.8	7.089	105.19	108.66	3.792	297.87	7.092	34.51	41.7
4.416	229.28	8.257	102.71	66.04	8.253	51.5	101.91	4.416	272.57	8.257	102.31	107.23	4.413	281.91	8.26	34.73	40.44
5.036	225.96	9.425	85.12	65.07	9.423	50.46	103.77	5.037	266.62	9.425	105.24	107.94	5.034	270.66	9.428	33.84	39.61
5.656	222.41	10.593	75.53	70.68	10.591	51.99	85.83	5.656	263.64	10.593	107.44	109.5	5.654	261.41	10.598	33.92	37.99
6.276	224.03	11.761	67.91	71.66	11.759	55.46	71.15	6.274	259.7	11.765	105.34	106.51	6.275	253.33	11.768	33.78	39.84
6.895	228.72	12.929	63.99	68.55	12.927	109.47	67.89	6.895	262.1	12.935	100.87	106.42	6.895	246.58	12.936	32.25	40.24
7.515	238.56	14.099	60.11	67.61	14.095	119.25	62.87	7.513	262.79	14.105	102.02	107.01	7.515	240.36	14.106	32.51	39.71
8.134	251.85	15.267	60.32	64.75	15.263	86.23	59.08	8.137	268.65	15.273	105.72	107.71	8.135	237.41	15.274	33.08	39.32
8.754	461.54	16.435	58.7	66.34	16.431	65.43	72.75	8.761	261.88	16.441	102.87	108.04	8.756	233.2	16.442	34.22	43.41
9.374	548.71	17.603	53.55	67.52	17.601	56.45	68.24	9.386	257.14	17.611	100.28	107.68	9.376	229.53	17.61	37.62	109.62
9.993	582.45	18.771	54.72	66.91	18.769	55.04	64.87	10.008	264.42	18.779	102.76	108.92	9.996	226.91	18.778	103.08	89.29
10.612	604.02	19.939	54.01	68.1	19.937	49.88	63.36	10.633	280.03	19.947	104.16	109.18	10.617	226.09	19.948	110.87	64.2
11.229	620.42	21.107	53.67	66.93	21.107	50.74	65.77	11.257	277.94	21.119	103.27	107.73	11.235	225.45	21.118	76.53	53.23
11.846	629.87	22.275	54.84	71.08	22.275	50.72	70.44	11.881	268.55	22.289	105.5	108.62	11.855	225.12	22.288	55.35	46.05
12.466	614.72	23.445	52.5	69.91	23.443	51.76	70.52	12.501	261.63	23.463	101.83	107.37	12.477	225.94	23.458	44.49	42.31
13.091	624.8	24.617	51.82	70.56	24.611	51.48	68.76	13.123	262.23	24.637	100.62	107.63	13.098	227.45	24.626	38.9	40.94
13.712	597.15	25.785	53.69	70.6	25.779	111.99	80.05	13.745	268.12	25.811	104.06	108.54	13.718	225.58	25.794	35.61	39.09
14.332	545.46	26.953	54.25	69.58	26.947	116.02	88.83	14.368	274.97	26.981	104.58	107.83	14.335	221.22	26.962	34.91	37.84
14.954	488.88	28.121	52.69	70.36	28.115	85.77	76.96	14.99	282.34	28.151	102.67	106.01	14.952	217.85	28.13	34.03	38.95
15.578	437.95	29.289	52.13	70.56	29.285	65.36	67.34	15.615	279.31	29.319	103.39	108.16	15.573	216.85	29.298	33.32	38.47
16.202	388.89	30.457	54.04	70.62	30.453	56.79	65.71	16.24	270.79	30.488	104.86	105.86	16.193	215.64	30.466	35.44	37.27
16.826	352.28	31.625	53.09	67.28	31.621	50.97	71.73	16.862	272.42	31.658	109.12	106.27	16.814	213.16	31.636	33.76	37.68
17.448	321.84	32.793	52.46	66.42	32.789	51.54	93.09	17.486	278.91	32.828	106.47	108.43	17.434	214.06	32.806	33.52	39.79
18.068	300.16	33.963	53.38	68.24	33.957	49.26	97.01	18.111	271.3	33.998	109.82	107.15	18.055	212.04	33.974	33.94	38.67
18.693	279.46	35.131	51.35	66.78	35.125	49.89	76.32	18.731	261.57	35.17	108.13	109.18	18.675	212.63	35.142	32.87	39.91
19.315	264.37	36.299	51.97	66.59	36.295	48.79	67.21	19.356	257.93	36.338	105.98	107.97	19.295	215.24	36.31	33.56	39.61
19.934	256.66	37.468	52.91	66.8	37.463	48.42	68.01	19.978	254.59	37.506	102.29	105.62	19.915	220.71	37.478	32.79	40.18
20.554	246.02	38.636	51.8	66.2	38.635	51.92	68.3	20.602	265.49	38.674	101.36	106.05	20.535	228.24	38.646	33.57	39.81
21.175	238.6	39.804	54.66	66.23	39.803	108.96	69.24	21.227	278.58	39.842	99.29	106.91	21.155	241.25	39.816	32.47	103.95
21.794	234.41	40.972	56.14	65.36	40.971	119.97	72.67	21.849	279.96	41.01	104.75	106.97	21.775	249.43	40.986	84.75	135.18
22.415	231.31	42.142	53.27	66.31	42.139	83.93	66.86	22.471	276.17	42.178	104.81	106.87	22.395	261.5	42.154	111.6	113.57
23.036	228.75	43.31	54.25	68.71	43.309	64.68	63.64	23.093	271.85	43.348	103.67	106.69	23.017	259.8	43.322	112.96	78.47
23.655	228.09	44.478	56.07	68.11	44.479	54.54	64.26	23.718	262.17	44.516	103.47	109.46	23.638	262.29	44.49	73.66	57.53
24.275	228.52	45.646	54.26	65.65	45.647	51.53	67.53	24.342	261.22	45.684	104.16	109.17	24.259	471.09	45.658	53.05	48.62
24.892	224.63	46.814	58.65	65.56	46.815	48.74	68.72	24.965	277.66	46.852	107.52	109.96	24.88	542.37	46.826	40.99	42.78
25.512	226.97	47.982	57.2	66.82	47.983	50.57	84.94	25.587	273.43	48.02	111.37	107.94	25.5	605.03	47.996	38.5	40.64
26.132	229.65	49.15	56.36	68.17	49.151	49.31	99.55	26.21	264.97	49.188	108.93	109.8	26.12	630.76	49.164	35.87	40.15
26.753	237.23	50.32	54.55	73.43	50.319	49.63	81.66	26.83	255.19	50.356	104.34	108.11	26.742	645.36	50.335	34.56	37.85
27.371	240.87	51.488	56.69	70.13	51.487	51.25	73.79	27.45	253.41	51.526	104.99	106.92	27.362	654.78	51.503	33.69	38.38
27.994	237.3	52.656	57.2	65.87	52.655	52.99	67.92	28.07	252.2	52.696	101.18	109.02	27.982	661.91	52.671	34.51	37.82
28.611	232.6	53.824	55.03	66.36	53.823	50.85	65.95	28.693	262.87	53.866	102.2	108.45	28.603	664.61	53.839	32.32	38.07
29.229	227.56	54.992	55.95	67.08	54.993	50.88	68.83	29.318	280.57	55.034	100.52	111.69	29.223	619.47	55.009	33.54	38.83
29.849	223.58	56.16	55.53	64.16	56.161	57.44	69.12	29.943	278.37	56.202	103.56	111.93	29.844	661.31	56.177	33.36	39.71
30.468	225.35	57.328	56.35	66.36	57.329	126.96	70.47	30.566	267.32	57.374	105.27	108.08	30.464	605.79	57.347	34.04	39.16
31.087	226.89	58.498	57.48	66.71	58.497	107.61	99.9	31.188	258.24	58.542	107.55	108.8	31.084	542.78	58.515	34.06	38.36
31.706	224.65	59.668	135.86	66.22	59.665	78.04	84.97	31.807	258.53	59.71	104.85	109.83	31.704	482.08	59.685	34.21	39.08
32.326	220.21	60.84	167.5	68.69	60.833	60.98	77.58	32.429	263.13	60.88	103.41	107.18	32.324	428.98	60.853	33.77	38.69
32.945	218.59	62.008	176.96	108.53	62.001	54.32	75.18	33.054	261.85	62.05	105.56	108.31	32.944	385.55	62.021	33.02	39.2
33.565	216.9	63.176	165.55	170.04	63.169	50.64	65.12	33.678	257.94	63.218	107.05	109.07	33.564	352.03	63.189	33.9	39.18
34.185	215.71	64.346	120.01	125.04	64.342	47.99	61.69	34.303	254.73	64.386	105.29	108.82	34.184	324.84	64.357	33.95	40.17
34.805	224.33	65.516	91.84	95.61	65.51	46.59	64.97	34.922	262.08	65.554	102.24	107.28	34.805	303.75	65.525	34.6	40.68
35.425	225.23	66.684	78.84	79.17	66.678	50.68	74.27	35.539	264.47	66.722	104.14	105.8	35.423	286.97	66.693	33.62	40.85
36.044	223	67.852	69.47	70.7	67.846	50.86	79.29	36.163	266.92	67.89	106.29	105.74	36.043	273.72	67.865	34.11	39.54
36.664	222.07	69.022	65.46	67.05	69.014	48.15	71.97	36.783	270.85	69.058	105.68	107.14	36.664	265	69.033	35.19	41.29
37.285	218.01	70.19	62.66	64.76	70.182	50.63	65.82	37.407	269.7	70.228	103.95	107.28	37.284	258.77	70.201	34.63	40.49
37.906	217.99	71.358	58.29	64.76	71.35	53.14	86.2	38.029	269.78	71.396	105.95	110	37.905	254.32	71.369	33.56	40.94
38.526	217.55	72.526	57.93	62.99	72.52	53.65	78.96	38.646	269.86	72.564	103.3	107.44	38.526	247.81	72.537	33.83	40.31
39.144	219.35	73.694	55.92	63.51	73.69	55.26	69.39	39.271	269.43	73.732	106.57	107.95	39.146	244.1	73.707	33.59	41.63
39.762	283.09	74.866	53.67	66.17	74.86	57.03	67.65	39.89	276.47	74.9	101.72	107.9	39.767	238.28	74.875	35.06	40.27
40.382	476.7	76.034	54.73	65.91	76.028	51.07	69.21	40.51	270.48	76.068	103.29	109.1	40.387	233.56	76.043	34.33	39.83
41.003	538.39	77.202	53.86	67.35	77.196	51.16	68.38	41.132	265.44	77.238	107.84	109.47	41.009	230.42	77.211	34.34	41.23
41.623	578.1	78.372	54.33	67.44	78.364	52.79	88.45	41.754	265.29	78.406	102.53	107.81	41.63	226.43	78.379	33.43	41.15
42.24	597.24	79.54	55.19	67.42	79.532	121.27	101.76	42.374	267.98	79.574	102.12	108.08	42.25	225.32	79.547	34.64	40.97
42.86	616.76	80.708	55.22	68.97	80.7	107.76	88.26	42.994	276.36	80.742	104.24	108.63	42.87	225.97	80.715	33.73	43.08
43.48	613.26	81.876	54.82	67.36	81.868	82.13	81.21	43.618	279.65	81.91	104.76	107.04	43.491	225.33	81.883	34.22	104.72
44.098	605.7	83.044	56.05	65.7	83.038	63.55	71.34	44.243	267.23	83.078	102.09	106.61	44.112	223.73	83.055	94.41	147.48
44.717	582.19	84.214	53.95	70.9	84.206	53.85	69.61	44.866	251.63	84.247	101.9	107.05	44.733	221.1	84.223	115.96	138.94
45.338	560.44	85.382	53.89	73.28	85.374	52.52	66.23	45.488	252.14	85.417	104.48	108.26	45.353	219.57	85.391	118.14	120.28
45.958	511.08	86.55	54.23	71.94	86.542	49.57	63.49	46.112	255.14	86.585	102.35	111.03	45.974	219.2	86.561	83.61	77.39
46.577	451.43	87.72	54.01	67.69	87.71	49.18	70.82	46.732	257.84	87.757	102.21	107.77	46.594	218.29	87.729	59.13	57.7
47.197	398.45	88.888	55.98	67.15	88.878	52.51	95.9	47.357	260.89	88.925	103.14	108.59	47.214	217.76	88.897	46.31	48.07
47.816	356.06	90.057	56.16	67.68	90.048	50.24	83.99	47.979	271.51	90.093	101.99	108.41	47.831	220.08	90.065	42.01	44.76
48.437	321.87	91.224	55.15	66.51	91.22	53.91	73.31	48.602	269.28	91.261	100.19	107.97	48.452	220.73	91.233	36.69	42.32
49.056	296.27	92.393	55.01	65.53	92.392	107.66	73.65	49.221	269.65	92.429	107.39	107.47	49.073	222.01	92.401	35.07	40.37
49.676	277.07	93.563	54.79	66.51	93.564	119.37	72.73	49.843	262.51	93.597	105.87	108.29	49.693	224.1	93.571	34.28	40.34
50.296	265.38	94.735	54.37	67.38	94.732	86.86	73.77	50.463	254.84	94.765	103.93	108.18	50.311	235.94	94.739	33.48	39.93
50.917	254.59	95.905	54.82	67.07	95.9	67.17	73.29	51.086	250.23	95.935	100.68	108.78	50.931	413.41	95.909	35.29	39.73
51.536	245.1	97.075	55.86	67.83	97.068	57.94	65.95	51.707	248.47	97.107	100.86	108.24	51.551	499.29	97.077	34.25	39.87
52.157	242.89	98.243	55.03	70	98.236	52.91	67.39	52.328	258.57	98.275	103.92	107.08	52.173	550.83	98.245	33.56	40.45
52.777	240.56	99.411	53.03	74.07	99.406	50.94	73.84	52.951	267.77	99.443	102.95	107.76	52.79	609	99.413	34.1	41.94
53.395	234.98	100.579	53.98	76.95	100.578	52.1	90.23	53.576	269.58	100.611	103.11	107.42	53.411	629.06	100.583	33.51	40.47
54.013	231.67	101.747	53.66	79.45	101.748	51.08	90.01	54.199	277.16	101.779	103.35	106.01	54.032	637.02	101.751	32.41	40.81
54.631	228.19	102.917	53.32	70.93	102.918	48.46	76.23	54.824	272.64	102.947	102.46	107.67	54.65	630.67	102.921	33.53	40.01
55.251	223.55	104.085	55.77	69.6	104.086	48.94	76.69	55.446	264.2	104.115	102.86	108.01	55.27	650.33	104.091	34.19	41.92
55.871	218.74	105.257	65.67	72.35	105.254	95.04	70.04	56.07	258.41	105.285	105.79	106.6	55.89	654.22	105.261	33.95	75.64
56.492	217.62	106.425	168.5	72.88	106.424	119.3	77.16	56.687	254.67	106.455	104.45	107.5	56.511	617.42	106.429	35.82	109.12
57.11	217.31	107.593	151.76	71.49	107.592	86.84	99.6	57.309	250.27	107.625	103.38	105.56	57.132	562.75	107.598	35.16	73.57
57.73	222	108.761	176.34	68.73	108.762	66.57	81.54	57.932	255.11	108.793	101.37	106.73	57.754	497.78	108.765	35.01	54.27
58.35	229.13	109.929	123.21	69.11	109.932	57.95	71.06	58.552	260.35	109.961	106.26	107.06	58.374	440.74	109.933	31.91	46.5
58.97	225.13	111.097	93.66	69.52	111.102	53.23	66.83	59.177	266.84	111.129	106.16	109.2	58.996	394.34	111.102	33.22	41.79
59.59	223.08	112.267	78.3	68.47	112.27	50.2	66.48	59.802	264.7	112.297	103.19	109.21	59.615	356.16	112.27	34.64	40.62
60.21	223.3	113.439	71.2	71.34	113.438	49.2	79.14	60.427	259.98	113.465	101.53	108.63	60.236	326.05	113.438	33.44	41.43
60.827	223.28	114.611	67.03	84.92	114.606	51.63	74.53	61.049	262.99	114.635	104.81	109.18	60.855	304.31	114.606	33.31	39.73
61.446	221.19	115.779	62.69	85.65	115.778	49.88	68.55	61.674	263.2	115.807	104.04	110.17	61.476	286.2	115.774	34.02	40.35
62.065	220.59	116.947	58.91	74.23	116.946	50.56	68.98	62.296	254.77	116.979	104.8	108.32	62.097	273.2	116.942	33.55	41.35
62.685	219.65	118.115	60.82	69.23	118.115	53.87	68.71	62.921	252.37	118.147	102.99	107.29	62.719	262.7	118.11	34.18	40.73
63.305	227.57	119.283	57.38	68.33	119.286	53.43	73.23	63.546	264.53	119.315	100.92	110.72	63.34	251.92	119.278	34.55	40.06
63.925	250.08	120.451	57.25	69.58	120.454	53.4	75.95	64.168	265.87	120.483	100.01	108.02	63.96	245.75	120.446	34.18	41.12
64.543	264.29	121.619	55.6	67.36	121.623	116.77	74.71	64.791	263.39	121.651	102.16	111.85	64.58	241.71	121.614	33.95	40.06
65.163	269.88	122.787	55.73	65.46	122.791	109.54	71.2	65.413	263.62	122.819	101.92	110.53	65.2	236.5	122.784	34.2	40.59
65.783	278.69	123.957	56.47	67.45	123.959	79.61	65.55	66.03	268.86	123.989	102.8	109.94	65.82	231.52	123.952	34.79	41.21
66.402	281.05	125.125	55.05	68.43	125.129	63.73	72.88	66.65	262.28	125.159	102.7	108.84	66.44	228.39	125.12	35.45	40.11
67.022	270.21	126.293	56.78	68.21	126.297	56.23	86.66	67.275	255.42	126.329	103.17	109.07	67.061	224.45	126.288	35.61	41.13
67.642	255.94	127.461	54.85	67.02	127.465	52.54	80.38	67.894	252.32	127.499	105.85	110.2	67.681	224.64	127.458	34.59	40.77
68.259	243.52	128.629	54.32	64.91	128.637	51.82	75.85	68.517	256.74	128.667	102.75	110.82	68.302	223.45	128.626	34.56	41.05
68.876	234.63	129.797	52.49	67.26	129.805	51.54	68.26	69.142	259.26	129.835	104.35	113.09	68.923	223.42	129.794	34.17	42.84
69.494	227.97	130.967	52.34	73.52	130.973	52.94	70.25	69.766	258.52	131.003	102.96	109.67	69.544	224.48	130.962	36.74	44.18
70.111	223.29	132.135	51.57	81.25	132.141	50.95	67.93	70.388	259.51	132.171	104.83	110.35	70.164	221.77	132.132	36.84	43.81
70.731	219.87	133.305	52.16	75.78	133.309	50.62	65.41	71.013	273.9	133.341	102.94	110.19	70.785	219.84	133.3	36.26	95.19
71.35	214.68	134.473	53.04	69.48	134.479	47.94	65.65	71.637	272.02	134.513	99.08	110.33	71.406	221.27	134.47	104.45	150.83
71.97	211.62	135.641	53.95	70.34	135.647	50.14	65.47	72.26	266.4	135.681	100.1	110.92	72.023	225.5	135.638	120.16	160.64
72.587	212.64	136.809	51.44	67.71	136.815	50.96	70.61	72.88	259.44	136.851	106.84	111.36	72.644	247.2	136.806	125.51	123.68
73.206	209.95	137.977	53.48	69.42	137.983	58.24	86.09	73.502	254.39	138.019	103.59	110.72	73.265	430.86	137.974	91.6	79.13
73.825	210.1	139.145	53.11	68.71	139.151	123.96	96.6	74.127	247.98	139.187	100.73	110.24	73.885	494.98	139.142	61.85	59.31
74.443	212.57	140.313	52.59	68.06	140.319	106.57	95.3	74.749	247.24	140.355	100.77	108.23	74.503	571.16	140.31	48.49	47.97
75.063	214.29	141.481	54.63	70.62	141.487	74.06	80.28	75.373	252.43	141.523	104.46	106.33	75.123	605.36	141.478	42.47	43.69
75.684	215.43	142.649	53.56	71.24	142.655	60.59	77.46	75.997	270.01	142.692	102.44	109.23	75.743	614.61	142.646	39.14	42.36
76.303	219.18	143.817	55.54	70.93	143.825	53.57	79.73	76.619	287.12	143.861	101.19	107.85	76.364	616.99	143.814	35.34	41.56
76.923	224.62	144.985	54.66	71	144.995	50.84	84.4	77.241	282.58	145.03	100.65	107.83	76.986	614.29	144.984	34.72	41.55
77.541	227.39	146.155	52.98	66.41	146.165	48.36	76.91	77.866	272.82	146.198	106.84	109.33	77.607	611.85	146.154	35.45	41.28
78.159	228.86	147.325	54.61	67.87	147.333	48.42	65.38	78.49	262.05	147.368	101.99	110.39	78.228	621.09	147.322	33.92	39.37
78.779	225.55	148.493	55.61	70.21	148.501	52.06	63.99	79.111	251.66	148.538	102.25	108.88	78.845	611.86	148.49	33.76	40.49
79.4	227.15	149.661	55.62	70.02	149.669	54.8	70.05	79.733	248.86	149.706	102.92	109.65	79.465	561.01	149.66	33.22	39.66
80.019	228.81	150.832	57.75	68.99	150.837	116.75	73.62	80.355	245.17	150.874	106.15	110.74	80.086	511.94	150.828	33.92	40.63
80.637	230.64	151.999	58.14	69.73	152.005	101.49	65.64	80.975	245.98	152.042	104.43	107.57	80.706	449.77	151.996	35.53	40.3
81.257	404.8	153.168	55.86	68.76	153.175	72.56	67.23	81.599	250.81	153.21	99.43	106.7	81.327	398.38	153.164	34.74	40.2
81.877	513.1	154.336	56.58	68.58	154.345	59.48	76.69	82.219	265.12	154.378	100.9	108.84	81.946	358.17	154.332	35.2	43.76
82.497	548.59	155.504	55.74	68.52	155.515	51.95	72.45	82.844	261.26	155.546	103.43	108.84	82.566	326.79	155.5	34.41	40.01
83.116	583.29	156.672	58.34	71.6	156.687	50.82	73.19	83.469	254.97	156.714	104.92	106.84	83.187	302.33	156.67	33.91	68.35
83.736	609.24	157.84	59.18	69.35	157.855	48.8	82.57	84.094	247.64	157.882	106.64	109.83	83.809	282.28	157.838	37.52	128.8
84.355	621.75	159.008	55.6	66.9	159.023	49.48	92.55	84.718	255.85	159.05	107.97	107.66	84.429	268.57	159.006	77.63	100.29
84.974	624.77	160.178	54.6	73.36	160.191	55.48	86.36	85.339	269.38	160.218	105.77	110.09	85.049	256.03	160.174	110.48	72.68
85.597	614.74	161.346	55.4	153.91	161.359	121.01	74.17	85.961	265.59	161.386	106.87	109.38	85.67	249.29	161.342	77.39	55.4
86.217	597.68	162.514	58.89	147.65	162.527	92.82	68.33	86.583	273.42	162.554	105.81	108.89	86.29	241.4	162.51	54.49	47.44
86.836	600.13	163.684	56.19	124.23	163.697	65.82	64.01	87.201	266.73	163.722	100.9	108.06	86.91	235.47	163.678	44.18	43.37
87.454	544.69	164.852	54.13	99.09	164.867	56.5	61.69	87.825	256.04	164.89	104.33	108.4	87.531	233.18	164.849	39.96	41.76
88.074	498.2	166.022	54.52	85.64	166.037	50.78	65.38	88.45	256.7	166.058	107.35	110.67	88.151	231.56	166.019	35.85	42.99
88.693	438.46	167.19	53.01	75.06	167.205	48.76	73.77	89.072	265.15	167.226	106.54	109.49	88.771	226.28	167.187	36	41.22
89.313	387.62	168.358	55.3	70.95	168.373	50.17	73.22	89.694	274.04	168.398	104.08	107.2	89.391	223.28	168.357	32.67	40.98
89.933	347.25	169.528	56.52	65.97	169.541	50.04	92.32	90.316	277.58	169.566	103.13	109.03	90.011	219.82	169.525	35.43	41.72
90.553	312.8	170.696	54.56	65.15	170.709	49.31	81.76	90.941	276.29	170.734	103.13	108.36	90.632	220.68	170.693	34.14	41.91
91.171	290	171.864	53.65	65.01	171.877	50.21	78.1	91.561	265.46	171.902	102.1	106.89	91.253	223.11	171.861	34.14	42.38
91.79	274.08	173.032	55.89	65.97	173.047	50.92	75.94	92.186	253.11	173.07	102.47	109.21	91.873	223.27	173.029	34.14	41.28
92.409	257.92	174.2	59.65	66.82	174.215	53.35	88.27	92.808	246.99	174.242	106.9	111.2	92.494	222.55	174.199	33.74	42.48
93.029	246.09	175.37	73.82	70.03	175.385	58.51	79.81	93.433	247.78	175.41	107.97	108.68	93.114	220.68	175.369	34.85	113.98
93.65	238.1	176.54	167.7	67.71	176.553	125.72	70.04	94.057	247.76	176.584	104.48	109.33	93.734	219.79	176.539	67.39	155.85
94.271	233.6	177.71	132.91	66.84	177.721	103.8	63.89	94.681	249.85	177.758	101.95	111.04	94.354	220.35	177.707	116.34	147.14
94.89	230.12	178.88	173.96	68.08	178.889	74.71	68.18	95.301	266.76	178.932	98.1	110.25	94.976	219.56	178.875	120.79	105.95
95.508	227.57	180.048	124.24	67.63	180.058	59.82	65.87	95.926	283.44	180.1	99.85	108.34	95.596	218.46	180.043	88.49	73.52
96.126	228.4	181.216	92.76	67.8	181.225	55.62	68.58	96.551	283.01	181.27	104.36	110.24	96.217	218.74	181.211	62.05	56.04
96.746	370.06	182.384	81.21	71.61	182.396	52.34	76.82	97.175	270.24	182.44	101.7	108.59	96.834	223.88	182.379	49.35	48.17
97.366	488.26	183.552	75.32	148.05	183.564	53.54	94	97.8	258.36	183.608	106.36	108.38	97.455	228.01	183.547	43	45.1
97.987	526.32	184.724	71.18	149.29	184.732	51.15	83.99	98.422	258.85	184.776	103.88	108.7	98.074	233.66	184.717	39.42	42.77
98.606	565.76	185.896	64.71	114.42	185.9	49.82	75.78	99.044	259.77	185.944	102.79	107.83	98.695	237.48	185.887	37.86	42.12
99.225	583.65	187.066	61.02	159.79	187.07	48.57	76.91	99.668	263.82	187.116	107.61	108.53	99.316	239.89	187.055	37.96	42.8
99.845	600.07	188.234	60.37	115.29	188.238	51.03	69.36	100.293	260.87	188.286	109.28	110.61	99.937	239.93	188.223	34.43	42.31
100.464	599.66	189.402	56.87	92.98	189.406	102.97	69.93	100.913	252.52	189.454	105.81	110.83	100.557	235.37	189.391	36.27	41.63
101.084	569.96	190.57	54.74	81.17	190.576	117.17	74.72	101.532	244.72	190.622	103.02	110.01	101.178	236.36	190.559	33.99	42.79
101.704	514.47	191.738	51.91	72.05	191.748	83.78	71	102.154	247.18	191.79	102.88	110.27	101.796	249.99	191.727	34	42.41
102.324	455.25	192.906	53.86	69.65	192.916	64.68	66.29	102.779	255.73	192.958	103.78	109.9	102.416	449.29	192.895	36.38	43.1
102.942	400.15	194.08	52.31	67.08	194.084	56.01	63.61	103.402	262.42	194.126	102.15	110.01	103.034	514.92	194.063	35.8	40.52
103.558	354.59	195.25	53.76	65.34	195.252	51.74	68.87	104.026	260.37	195.294	107.9	110.18	103.654	569.07	195.233	33.61	42.12
104.178	320.73	196.42	53.92	64.85	196.42	50.19	83.83	104.648	253.24	196.462	102.67	109.19	104.274	596.01	196.401	34.71	44.86
104.799	294.95	197.588	53.77	65.38	197.588	49.78	73.93	105.273	245.28	197.632	101.08	108.11	104.894	580.33	197.569	34.14	43.16
105.419	272.81	198.756	53.04	67.14	198.756	50.81	70.68	105.897	253.02	198.804	103.54	106.83	105.515	609.4	198.737	33.77	43.82
106.039	253.68	199.924	52.73	63.87	199.924	49.01	69.22	106.523	254.77	199.972	104.21	107.24	106.137	571.45	199.905	36.21	126.6
106.659	241.96	201.092	52.61	64.08	201.092	51.36	66.06	107.148	252.12	201.141	105.19	110.8	106.758	610.8	201.073	38.97	126.89
107.277	232.53	202.262	52.65	66.32	202.26	51.37	75.01	107.767	259.04	202.309	105.4	108.61	107.375	573.44	202.241	38.31	84.34
107.897	226.71	203.432	52.27	66.45	203.428	112.63	74.8	108.388	269.37	203.477	106.59	107.05	107.995	530.07	203.411	37.71	60.83
108.516	223.46	204.602	50.59	67.83	204.596	114.23	82.32	109.011	268.19	204.645	104.54	107.6	108.615	477.26	204.579	35.48	50.84
109.136	221.15	205.774	52.34	66.42	205.766	81.96	82.98	109.631	264.43	205.813	102.15	106.88	109.236	419.42	205.747	33.83	45.66
109.757	219.51	206.943	54.8	72.52	206.936	61.11	70.87	110.255	261.46	206.985	103.42	108.96	109.856	375.21	206.917	33.99	46.56
110.377	216.63	208.111	54.49	78.67	208.104	56.32	65.96	110.88	259.16	208.153	100.7	108.62	110.476	338.63	208.085	35.21	47.12
110.997	221.27	209.279	54.94	72.08	209.272	51.7	67.03	111.502	251.75	209.321	100.66	107.78	111.097	311.86	209.253	34.47	44.04
111.617	220.5	210.447	55.1	70.4	210.444	52.16	71.02	112.127	255.18	210.489	104.64	109.93	111.718	289	210.421	35.34	43.45
112.238	216.87	211.615	56.73	70.75	211.612	52.77	73.01	112.749	256.55	211.657	108.26	109.79	112.338	272.12	211.589	36.25	42.07
112.858	214.41	212.783	57.12	71.34	212.78	52.64	77.9	113.373	261.63	212.825	103.57	110.08	112.96	257.93	212.759	37.39	42.15
113.479	221.61	213.955	54.39	72.61	213.95	51.36	69.42	113.995	267.75	213.993	105.3	108.67	113.58	247.82	213.927	33.69	43.07
114.097	221.32	215.125	53.83	70.96	215.12	51.5	66.33	114.62	266.91	215.165	103.52	109.4	114.2	242.03	215.095	34.39	42.46
114.716	221.16	216.293	58.14	73.37	216.292	55.42	67.62	115.242	264.37	216.337	110.45	109.22	114.821	236.12	216.263	34.7	41.51
115.336	221.68	217.461	54.93	70.5	217.462	124.95	73.87	115.864	263.77	217.505	104.15	109.1	115.442	229.43	217.435	35.33	43.06
115.956	227.83	218.629	53.1	70.09	218.63	104.42	67.89	116.489	259.26	218.673	110.08	109.39	116.063	225.79	218.603	35.26	42.86
116.576	246.73	219.797	53.97	68.26	219.802	76.02	72.38	117.114	252.91	219.845	104.3	108.46	116.684	220.33	219.771	36.4	42.53
117.196	249.82	220.965	53.82	70.36	220.97	62.63	91.36	117.739	252.81	221.013	103.93	108.16	117.303	217.57	220.939	34.78	43.73
117.815	240.58	222.133	52.29	69.55	222.138	55.34	78.09	118.363	255.31	222.181	103.1	110.2	117.922	215.29	222.11	35.67	44.06
118.435	230.98	223.301	53.49	67.76	223.306	52.91	73.16	118.987	258.28	223.351	102.26	108.82	118.542	217.34	223.278	35.96	44.25
119.054	224.92	224.467	53.29	123.21	224.474	51.67	68.93	119.611	260.59	224.523	101.45	108.97	119.162	215.35	224.446	34.48	44.35
119.674	218.03	225.635	53.37	146.27	225.642	50.53	64.54	120.233	259.54	225.693	103.77	108.52	119.783	219.35	225.614	35.47	44.59
120.293	214.71	226.803	57.41	108.3	226.812	49.77	66.25	120.855	267.49	226.863	101.71	108.75	120.404	221.14	226.782	35.22	44.92
120.911	212.31	227.971	56.11	94.66	227.98	48.25	72.75	121.475	253.26	228.031	104.89	108.22	121.025	218.86	227.952	36.82	46.26
121.529	207.67	229.139	57.88	82.98	229.148	51.47	69.39	122.095	242.24	229.199	107.5	108.55	121.645	217.96	229.12	36.35	45.75
122.147	206.06	230.307	56.86	75.06	230.318	116.85	75.35	122.714	241.02	230.369	104.6	107.13	122.265	217.21	230.288	37.19	49.51
122.766	207.6	231.475	57.07	71.09	231.486	108.83	95.05	123.336	250.43	231.537	105.4	109.34	122.882	217.42	231.46	35.84	51.72
123.385	209.93	232.643	56.99	68.52	232.654	77.15	76.69	123.958	265.1	232.705	104.56	109.11	123.502	400.51	232.628	37.67	51.34
124.006	214.69	233.811	58.61	66.43	233.826	63.3	69.18	124.58	267.72	233.873	105.19	111.13	124.123	483.59	233.796	38.08	141.43
124.626	218.13	234.979	60.88	65.58	234.999	54.16	67.88	125.205	256.48	235.041	106.15	111.6	124.743	542.46	234.964	111.25	172.1
125.246	221.06	236.147	58.93	66.88	236.169	51.19	62.56	125.829	249.75	236.209	102.89	107.93	125.364	577.19	236.132	122.2	150.88
125.866	228.1	237.315	57.34	66.55	237.337	49.51	65.18	126.451	243.1	237.377	99.76	109.22	125.985	592.82	237.302	127.24	159.69
126.486	231.25	238.483	61.08	65.2	238.505	49.13	72.95	127.076	245.86	238.547	103.6	108.26	126.605	585.22	238.47	91.57	107.36
127.107	235.59	239.651	59.39	62.91	239.673	49.75	69.75	127.7	255.53	239.719	104.9	108.27	127.227	596.24	239.638	65.46	74.38
127.727	240.28	240.819	58.24	62.66	240.841	51.57	68.17	128.324	268.75	240.887	103.87	110.03	127.848	576.27	240.806	52.01	57.14
128.347	236.44	241.987	58.97	63.51	242.009	112.11	69.09	128.949	276.52	242.059	105.24	109.07	128.468	541.1	241.974	44.77	48.73
128.966	230.12	243.153	57.29	64.51	243.177	113.35	87.4	129.571	283.76	243.227	104.06	109.83	129.089	484.3	243.142	40.95	48
129.583	227.49	244.321	57.81	65.79	244.349	80.77	88.1	130.196	279.73	244.395	105.12	107.86	129.709	425.6	244.31	38.23	44.23
130.201	224.34	245.489	62.35	67.49	245.519	62.26	70.84	130.821	271.42	245.563	102.99	107.25	130.33	376.94	245.478	37.2	43.73
130.822	227.74	246.659	63.56	73.47	246.691	53.34	69.23	131.441	257.96	246.731	106.43	108.97	130.951	338.97	246.648	37.15	44.21
131.442	236.43	247.829	61.63	74.59	247.859	49.81	72.86	132.062	247.6	247.899	104.36	107.11	131.572	308.49	247.82	36.76	44.43
132.061	238.57	248.999	61.66	67.71	249.027	48.82	67.73	132.68	238.28	249.067	102.25	108.09	132.192	285.14	248.99	34.7	43.42
132.68	236.43	250.167	61.46	66.24	250.195	48.22	64.58	133.3	234.35	250.239	101.98	106.82	132.813	267.59	250.158	33.36	43.16
133.299	233.87	251.337	60.09	65.55	251.363	49.07	63.68	133.92	250.91	251.407	102.42	106.3	133.433	252.78	251.326	35.12	44.02
133.918	235.34	252.505	59.47	66.5	252.531	52.38	65.68	134.539	275.32	252.579	102.21	108.04	134.055	241.8	252.494	34.6	42.91
134.538	244.36	253.673	60.06	66.02	253.699	120.41	72.53	135.159	278.85	253.748	103.52	108.93	134.674	235.59	253.662	35.36	45.69
135.158	264.33	254.841	58.86	65.3	254.871	104.66	102.18	135.78	270.53	254.915	101.39	108.77	135.294	229.02	254.832	35.52	108.6
135.778	267.81	256.009	59.36	68.64	256.041	79.29	90.67	136.4	256.61	256.084	105.36	110.57	135.915	220.9	256.002	39.55	124.06
136.396	263.68	257.177	61.08	68.41	257.209	59.9	76.33	137.021	249.35	257.252	100.24	109.55	136.532	218.26	257.174	37.94	85.47
137.016	251.36	258.347	59.34	67.79	258.377	52.33	73.61	137.641	252.57	258.422	102.27	107.4	137.152	214.68	258.344	35.98	61.26
137.635	245.92	259.517	57.15	70.11	259.545	50.29	77.84	138.261	256.01	259.594	104.87	107.86	137.774	212.56	259.512	35.32	49.87
138.255	235.94	260.685	57.59	71.32	260.713	49.52	73.77	138.881	254.53	260.762	108.19	109.03	138.395	213.93	260.68	35.99	45.25
138.876	229.21	261.853	58.36	68.48	261.883	50.84	68.65	139.501	249.88	261.934	105.69	110.38	139.015	215.63	261.848	36.34	45.85
139.496	224.28	263.022	56.12	69.78	263.051	52.82	68.64	140.122	244.23	263.102	101.38	107.6	139.636	215.13	263.016	35.13	43.99
140.115	223.07	264.189	57.09	69.76	264.219	49.96	64.92	140.742	245.4	264.27	100.22	108.89	140.255	222.7	264.186	36.05	44.05
140.735	223.14	265.36	58.86	70.15	265.389	48.43	61.08	141.363	251.98	265.438	102.87	110.11	140.872	392.95	265.356	35.36	43.69
141.354	226.05	266.53	147.2	70.83	266.557	50.47	64.21	141.985	258.04	266.606	102.16	108.36	141.492	456.32	266.524	36.97	45.17
141.974	245.86	267.702	168.1	68.65	267.725	49.72	71.38	142.605	265.37	267.778	102.93	108.52	142.112	521.3	267.692	36.92	45.39
142.595	248.54	268.87	175.44	67.7	268.893	54.65	68.72	143.225	270.4	268.946	103.87	106.44	142.733	549.38	268.86	35.4	44.59
143.215	251.9	270.038	131.79	66.73	270.061	124.65	95.65	143.843	276.77	270.118	101.18	107.69	143.35	572	270.028	35.94	47.94
143.835	254.47	271.206	103.52	66.65	271.229	103.72	87.74	144.463	280	271.29	100.7	109.93	143.97	571.51	271.196	37.8	134.5
144.455	250.11	272.374	85.99	71.46	272.397	77.28	73.85	145.084	268.31	272.458	106.28	108.41	144.591	587.08	272.364	104.76	167.61
145.073	243.06	273.542	77.67	69.8	273.567	61.25	69.94	145.704	256.8	273.626	102.99	108.45	145.211	540.08	273.532	120.04	136.61
145.693	234.27	274.71	70.47	67.97	274.739	52.51	68.28	146.325	253.15	274.794	104.7	107.11	145.831	491.13	274.7	116.14	90.28
146.313	231.9	275.88	65.33	71.86	275.907	49.73	67.7	146.945	249.44	275.962	102.62	107.01	146.451	457.42	275.87	76.23	63.37
146.933	231.15	277.05	65.01	72.04	277.075	49.16	68.68	147.566	245.56	277.13	103.61	106.7	147.071	408.47	277.04	57.82	51.28
147.553	231.32	278.222	62.71	72.24	278.245	49.67	89.45	148.184	244.82	278.298	102.44	108.65	147.689	358.78	278.208	47.03	49.44
148.172	233.33	279.39	59.55	71.75	279.413	50.49	80.01	148.803	254.92	279.466	102.41	109.9	148.307	322.38	279.376	41.72	44.36
148.792	233.67	280.558	60.39	71.94	280.581	51.1	71.15	149.423	256.99	280.634	104.23	109.74	148.926	293.95	280.544	38.08	43.89
149.412	231.73	281.726	58.96	76.58	281.749	50.69	67.18	150.04	249.54	281.802	104.44	106.85	149.547	271.03	281.712	36.89	43.82
150.032	235.28	282.894	61.06	117.06	282.919	50.52	68.25	150.661	241.04	282.97	102.53	106.9	150.164	255.53	282.881	36.21	43.41
150.651	234.92	284.066	59.77	161.29	284.087	55.69	65.25	151.281	234.68	284.14	103.95	107.8	150.784	243.72	284.051	35.75	42.85
151.269	231.63	285.234	58.24	111.98	285.255	122.88	64.26	151.899	235.71	285.308	101.91	105.4	151.404	233.86	285.221	36.67	44.82
151.888	228.3	286.404	58.97	88.82	286.423	97.64	74.99	152.521	245.99	286.48	105.46	108.17	152.024	230.07	286.389	35.84	43.84
152.507	228.55	287.574	58.54	76.08	287.593	71.27	69.88	153.141	266.85	287.652	102.16	108.14	152.645	223.95	287.557	35.26	45.3
153.128	240.69	288.742	57.59	71.18	288.763	58.68	67.41	153.761	268.54	288.824	101.09	107.12	153.266	219.69	288.723	34.02	44.63
153.748	277.17	289.91	56.04	64.54	289.931	51.67	75.17	154.382	264.07	289.992	105.93	107.02	153.886	216.97	289.891	35.58	44.34
154.368	462.14	291.078	56.54	64.32	291.099	49.17	87.85	155	252.1	291.16	104.52	108.76	154.507	213.16	291.059	36.05	44.32
154.986	541.78	292.246	54.95	68.21	292.269	47.02	77.53	155.621	250.63	292.328	103.53	109.41	155.128	212.82	292.227	34.74	44.07
155.606	578.78	293.414	54.69	65.63	293.438	48.11	74.65	156.242	249.71	293.496	100.32	104.65	155.746	211.85	293.397	34.98	101.27
156.223	604.82	294.582	55.16	64.15	294.606	52.73	79.59	156.862	248.97	294.664	100.42	109.05	156.367	207.99	294.567	36.66	138.41
156.843	616.38	295.752	55	65.48	295.773	113.71	78.18	157.482	250.25	295.832	103.72	108.16	156.987	211.83	295.735	40.38	117.9
157.464	619.81	296.922	53.64	66.71	296.942	114.02	68.7	158.102	259.67	297.004	104.21	107.59	157.607	232.76	296.903	39.25	83.16
158.085	615.39	298.09	52.98	68.01	298.11	82.3	65.99	158.722	265.05	298.176	105.01	105.74	158.228	239.55	298.071	36.79	62.99
158.704	604.45	299.258	54.92	64.49	299.28	62.06	69.87	159.343	257.42	299.344	102.06	106.27	158.848	238.16	299.239	36.24	49.75
159.323	565.32	300.426	56.12	66.12	300.448	54.73	65.07	159.965	263.44	300.514	102.01	105.96	159.467	238.67	300.407	35.75	46.6
159.943	532.35	301.594	55.91	65.36	301.62	49.32	65.89	160.585	272.53	301.682	100.25	104.83	160.087	230.6	301.575	35.06	45.6
160.563	557.37	302.762	54.51	67.07	302.788	50.66	64.92	161.204	267.37	302.85	102.98	104.52	160.707	222.27	302.745	35.74	45.16
161.184	560.26	303.93	55.42	67.83	303.956	47.99	66.41	161.824	267.08	304.018	104.25	105.39	161.325	215.79	303.915	36.36	47.85
161.805	505.71	305.1	54.92	67.16	305.124	46.69	73.22	162.445	262.56	305.186	103.99	107.37	161.945	213.35	305.083	36.68	52.02
162.424	451.18	306.268	55.78	68.11	306.292	50.86	87.24	163.065	251.54	306.356	105.1	104.89	162.565	216.31	306.251	38.07	48.16
163.044	401.03	307.436	56.52	76.17	307.46	107.1	85.49	163.684	244.58	307.528	102.89	107.99	163.187	228.49	307.421	37.03	46.43
163.663	359.3	308.604	54.01	95.49	308.632	116.35	73.98	164.304	247.95	308.696	102.58	104.96	163.808	412.46	308.591	36.24	44.48
164.283	325.25	309.772	54.1	160.18	309.8	81.1	68.6	164.925	262.99	309.864	103.91	106.96	164.428	446.4	309.759	34.99	45.87
164.904	305.92	310.94	56.03	126.45	310.968	63.54	64.04	165.546	269.99	311.032	99.06	109.78	165.048	522.49	310.927	34.82	44.58
165.524	285.41	312.108	53.52	100.96	312.136	55.9	63.22	166.163	258.44	312.204	98.56	106.68	165.668	553.45	312.095	35.45	44.02
166.145	268.2	313.276	57.16	84.06	313.302	51.53	66.06	166.783	249.17	313.374	103.1	106.13	166.288	559.24	313.265	34.41	45.05
166.764	257.56	314.446	54.79	73.64	314.47	50.86	64.22	167.404	244.78	314.542	103.41	105.46	166.91	577.59	314.433	36.41	45.2
167.383	248.35	315.616	55.53	70.07	315.638	51.31	64.43	168.024	241.87	315.712	99.6	107.98	167.531	531.9	315.601	35.6	44.76
168.003	240.81	316.784	56.61	67.97	316.806	49.6	64.47	168.642	243.25	316.881	100.93	108.8	168.151	571.57	316.769	36.8	44.34
168.623	234.28	317.952	53.61	64.35	317.974	50.15	64.44	169.262	250.19	318.049	103.98	107.27	168.772	525.43	317.937	36.5	46.14
169.243	230.58	319.122	54.02	64.01	319.146	106.84	71.23	169.881	267.62	319.217	106.2	108.67	169.393	469.32	319.107	36.96	46.4
169.863	229.19	320.292	55.31	63.65	320.314	116.96	81.59	170.502	283.04	320.385	105.05	108.46	170.014	408.8	320.275	35.45	46.48
170.482	225.48	321.46	53.55	63.7	321.482	80.1	83.93	171.122	284.65	321.553	102.84	106.83	170.635	359.23	321.443	35.7	46.29
171.102	223.76	322.63	53.64	62.19	322.65	64.76	80.49	171.742	274.19	322.723	101.98	107.31	171.256	320.51	322.611	36.58	49.5
171.723	226.75	323.798	53.2	70.59	323.818	56.2	70.48	172.362	261.45	323.891	101.14	105.44	171.876	291.21	323.779	37.73	149.34
172.344	228.76	324.969	55.03	68.63	324.988	50.91	74.2	172.983	249.88	325.059	101.69	107.73	172.495	268.3	324.947	114.66	172.97
172.963	227.63	326.137	155.76	66.15	326.158	50.41	67.25	173.603	248.29	326.227	102.85	104.94	173.116	250.84	326.115	126.13	145.63
173.582	244.01	327.305	143.3	67.87	327.33	48.15	73.45	174.224	257.22	327.395	100.24	103.89	173.737	238.31	327.287	130.05	104.03
174.2	245.68	328.473	180.33	69.23	328.502	48.76	78.56	174.846	263.36	328.563	105.23	106.35	174.358	232.48	328.455	112.47	87.68
174.82	246.27	329.643	138.33	70.41	329.67	47.85	71.44	175.465	265.93	329.731	101.11	103.06	174.978	225.64	329.623	74.92	66.92
175.44	248.49	330.811	100.1	77.13	330.838	46.62	65.79	176.082	271.29	330.899	99.87	106.79	175.598	221.86	330.791	57.83	53.8
176.061	248.21	331.981	82.09	79.68	332.006	52.35	64.55	176.702	274.46	332.071	99.24	106.36	176.218	218.85	331.959	47.39	50.56
176.681	250.71	333.149	72.17	73.03	333.174	120.76	69.9	177.319	262.16	333.241	102.25	106.5	176.839	214.51	333.127	42.68	47.09
177.3	257.01	334.317	65.57	74.12	334.346	111.26	74.89	177.936	249.13	334.409	103.25	109.19	177.461	212.2	334.295	40.34	45.03
177.92	255.13	335.485	60.43	76.64	335.514	79.14	70.91	178.556	246.57	335.577	102.67	106.47	178.082	210.53	335.464	38.32	43.36
178.54	251.34	336.653	58.9	75.01	336.686	61.44	69.41	179.177	246.18	336.745	102.57	107.3	178.702	208.75	336.632	36.58	44.72
179.16	246.87	337.821	58.26	73.15	337.858	52.85	63.3	179.798	269	337.913	106.23	105.94	179.323	212.22	337.802	36.43	44.49
179.781	236.83	338.991	56.1	69.62	339.026	50.74	64.52	180.419	273.41	339.081	106.71	105.04	179.943	228.23	338.972	34.53	45.73
180.399	228.06	340.161	55.6	68.56	340.194	48.28	69.84	181.039	261.74	340.253	100.71	105.64	180.563	310.54	340.14	35.85	55.44
181.02	223.7	341.331	55.64	68.3	341.362	48.1	71.36	181.66	254.14	341.423	98.73	108.08	181.185	438.88	341.308	35.35	79.16
181.639	221.56	342.499	53.28	67.61	342.53	47.71	64.06	182.281	251.35	342.591	106.19	107.77	181.806	498.6	342.476	35.58	62.36
182.258	221.07	343.667	54.46	67.68	343.698	49.19	68.99	182.901	255.57	343.759	102.47	106.68	182.426	507.96	343.644	36.17	52.88
182.878	223.66	344.835	53.06	68.96	344.868	102.79	88.58	183.52	267.63	344.929	99.93	105.58	183.047	548.43	344.814	36.89	48.66
183.498	233.16	346.003	54.61	71.63	346.038	118.3	95.18	184.14	265.81	346.097	104.46	106.35	183.668	551.55	345.982	36.12	47.98
184.116	245.96	347.171	53.43	71.47	347.206	85.7	78.61	184.761	253.87	347.265	105.87	106.71	184.29	560.11	347.152	35.33	46.41
184.735	257.85	348.341	54.08	72.09	348.376	64.24	71.76	185.383	249	348.433	104.78	107.19	184.91	511.54	348.322	34.6	46.22
185.353	255.5	349.511	55.21	75.53	349.544	53.59	75.38	186.003	246.07	349.603	100.6	105.19	185.53	469.74	349.492	35.41	45.84
185.973	244.3	350.681	54.35	77.49	350.712	50.01	83.22	186.623	250.9	350.773	103.21	105.12	186.15	427.39	350.66	36.35	44.15
186.593	235.12	351.849	52.68	145.44	351.88	48.54	67.72	187.242	256.68	351.941	100.06	106	186.77	373.87	351.828	35.64	44.84
187.213	227.93	353.017	51.91	154.84	353.049	48.59	63.3	187.862	253.53	353.109	101.82	104.81	187.391	328.98	352.996	35.2	46.5
187.833	220.86	354.185	51.48	179.32	354.219	48.97	61.5	188.483	247.36	354.277	99.79	103.59	188.012	294.41	354.164	34.15	47.54
188.453	214.61	355.353	52.56	158.01	355.391	87.14	65.5	189.104	248.72	355.445	100.84	103.7	188.633	269.67	355.334	36.4	47.19
189.072	214.51	356.521	53.28	134.55	356.559	121.56	84.34	189.725	251.69	356.613	101.97	104.81	189.254	251.55	356.504	35.74	51.26
189.692	214.31	357.691	54.43	117.38	357.727	87.44	96.61	190.345	251.47	357.781	103.16	106.91	189.874	236.34	357.676	39.61	153.53
190.313	215.38	358.861	55.52	103.81	358.895	63.5	80.02	190.965	258.49	358.953	105.74	106.35	190.494	227.69	358.844	116.2	175.48
190.934	224.21	360.031	54.96	89.95	360.065	54.09	70.39	191.585	262.65	360.125	107.37	106.47	191.115	221.34	360.012	120.01	152.1
191.553	230.02	361.199	57.4	86.2	361.233	49.65	70.08	192.203	266.02	361.297	107.75	106.49	191.735	216.63	361.18	114.95	107.63
192.17	230.71	362.367	54.19	78.33	362.401	49.51	66.53	192.824	265.3	362.465	102.81	104.92	192.356	213.39	362.348	76.61	73.97
192.787	229.89	363.535	53.89	71.91	363.571	48.13	67.68	193.445	257.19	363.633	98.35	105.6	192.977	207.95	363.516	57.91	58.01
193.405	229.23	364.703	53.24	70.1	364.745	48.22	77.36	194.063	253.64	364.801	96.41	105.5	193.598	204.71	364.686	47.5	50.67
194.026	227.64	365.871	57.77	64.59	365.915	53.46	80.85	194.68	261.2	365.969	98.26	104.06	194.216	203.08	365.854	41.54	47.14
194.647	223.03	367.039	57.87	63.61	367.083	52.6	80.06	195.3	270.67	367.139	98.54	105.99	194.836	201.83	367.024	38.4	46.21
195.266	222.49	368.207	56.17	64.3	368.253	49.36	67.25	195.92	264.6	368.307	98.86	104.95	195.456	201.76	368.192	38.18	45.88
195.887	231.65	369.377	53.5	65.87	369.421	48.05	64.09	196.54	259.7	369.479	99.07	104.33	196.076	201.47	369.36	35.64	44.49
196.504	237.98	370.545	55.01	62.83	370.593	51.77	68.34	197.16	254.22	370.65	97.26	104.32	196.697	202.16	370.528	36.66	44.04
197.124	252.13	371.713	55.98	63.6	371.761	52.01	65.38	197.778	251	371.818	100.98	105.98	197.317	202.56	371.696	35.03	44.65
197.744	263.46	372.881	57.01	60.37	372.929	49.63	64.54	198.399	246.37	372.986	101.01	105.96	197.938	205.54	372.864	35.43	44.18
198.364	262.3	374.049	56.19	62.3	374.099	47.41	66.56	199.02	251	374.154	97.92	104.74	198.56	205.75	374.032	36.59	46.05
198.984	254.71	375.217	53.8	63.86	375.267	47.8	69.64	199.641	257.4	375.322	99.61	105.51	199.18	207.07	375.202	36.81	45.06
199.602	250.64	376.389	53.03	63.97	376.435	51.95	65.43	200.261	256.38	376.49	105.02	104.63	199.8	211.35	376.37	36.11	46.39
200.22	241.83	377.56	54.81	64.04	377.603	104.3	88.4	200.881	257.05	377.662	105.94	106.23	200.42	325.84	377.538	36.68	49.88
200.839	240.33	378.728	54.41	65.34	378.771	123.29	109.87	201.501	261.75	378.834	100.46	105.05	201.04	430.63	378.706	37.32	109.94
201.459	286.21	379.896	55.06	67.04	379.943	95.2	95.64	202.121	257.88	380.004	99.12	105.9	201.661	458.76	379.874	39.07	122.49
202.079	470.92	381.064	54.89	66.22	381.111	69.91	86.3	202.741	247.79	381.172	97.62	106.42	202.281	524.24	381.042	37.91	81.44
202.699	534.38	382.232	54.02	67.79	382.279	58.38	73.36	203.362	246.32	382.34	100.89	105.04	202.902	535.65	382.21	37.12	61.34
203.317	579.85	383.4	53.82	72.49	383.449	52.63	67.25	203.983	247.26	383.51	103.8	104.47	203.522	546.24	383.378	35.48	52.5
203.935	596.9	384.57	53.95	70.99	384.617	49.02	62.48	204.603	255.17	384.678	101.6	106	204.142	543.96	384.546	35.7	46.76
204.555	609.63	385.74	57.28	70.86	385.785	49.2	81.41	205.223	258.03	385.846	102.1	104.39	204.762	556.06	385.716	36.58	46.17
205.178	622.63	386.91	64.78	72.11	386.953	48.58	87.77	205.843	263.4	387.014	99.21	105.23	205.384	503.08	386.884	35.42	45.37
205.799	607.08	388.078	61.93	73.36	388.121	47.46	71.57	206.463	263.9	388.182	101.43	102.98	206.006	446.07	388.052	36.97	45.33
206.419	592.8	389.246	55.46	69.8	389.289	48.28	67.38	207.083	258.59	389.35	102.23	106.23	206.626	387.74	389.22	35.88	45.37
207.039	590.48	390.414	55.9	70.63	390.459	82.63	74.43	207.704	249.88	390.518	103.27	103.02	207.247	337.47	390.39	37.64	53.21
207.661	569.75	391.586	54.47	70.23	391.627	118.93	78.46	208.325	251.69	391.686	102.11	105.72	207.868	299.95	391.558	40.83	147.59
208.285	506.36	392.754	55.32	69.68	392.795	88.68	68.26	208.946	255.78	392.858	97.53	104.17	208.488	273.37	392.726	116.42	172.29
208.905	446.16	393.922	56.17	69.82	393.963	64.83	62.76	209.566	250.6	394.026	96.45	104.9	209.106	251.2	393.895	123.33	122.5
209.527	392.6	395.092	56.15	75.42	395.131	55.42	64.94	210.184	245.88	395.194	97.23	105.13	209.727	236.69	395.065	101.17	82.18
210.144	351.79	396.26	55.92	75.5	396.299	51.25	72.95	210.804	246.59	396.364	98.07	104.48	210.347	225.8	396.233	70.55	60.84
210.764	321.6	397.428	53.72	76.35	397.467	48.86	67.66	211.424	256.46	397.532	98.49	105.2	210.968	217.64	397.401	51.84	51.65
211.385	294.14	398.596	55.64	69.51	398.635	48.25	71.78	212.044	261.42	398.7	98.59	104.56	211.587	211.82	398.569	45.79	47.32
212.006	271.52	399.764	56.88	66.82	399.805	45.76	70.95	212.665	257.44	399.868	100.39	104.4	212.205	208	399.739	41.24	45.45
212.627	255.05	400.934	56.22	69.05	400.975	47.31	71.03	213.286	252.06	401.036	99.43	101.1	212.825	206.14	400.909	38.36	45.7
213.247	245.04	402.102	56.92	68.5	402.143	50.15	85.85	213.907	242.88	402.208	102.18	102.32	213.442	203.07	402.077	37.56	45.09
213.866	240.72	403.27	57.87	66.95	403.311	83.66	89.57	214.529	237.09	403.378	103.33	105.13	214.062	207.72	403.245	35.79	44.25
214.486	234.92	404.438	57.58	66.94	404.479	122.13	74.37	215.149	238.89	404.548	110.41	103.63	214.682	207.74	404.413	35.75	44.28
215.106	230.87	405.608	55.07	67.78	405.647	94.44	68.95	215.769	252.03	405.718	103.49	101.97	215.302	206.45	405.581	35.53	45.46
215.727	225.22	406.776	55.09	84.16	406.816	67.95	84.6	216.391	269.38	406.89	99.85	103.59	215.922	204.98	406.749	36.17	46.76
216.347	225.69	407.944	53.25	166.68	407.984	57.37	76.53	217.008	269.36	408.058	96.6	105.5	216.543	204.22	407.917	35.99	45.58
216.967	227.94	409.112	54.26	133.45	409.154	51.51	67.01	217.63	265.03	409.226	99.67	104.04	217.165	208.38	409.087	35.52	46.78
217.587	227.25	410.282	53.76	110.44	410.326	51.09	63.91	218.25	261.53	410.394	100.05	105.18	217.786	208.21	410.257	36.58	49.93
218.205	225.01	411.45	55.28	89.99	411.494	48.26	73.02	218.872	253.27	411.562	102.46	104.68	218.406	205.2	411.425	36.24	58.02
218.825	224.54	412.618	55.01	77.25	412.662	46.82	80.9	219.491	245.09	412.732	102.2	104.66	219.026	206.36	412.595	38.15	142.04
219.446	221.25	413.786	54.46	71.22	413.83	47.11	69.45	220.11	239.81	413.902	100.53	103.19	219.646	204.69	413.763	43.1	107.94
220.065	223.99	414.954	53.55	69	414.998	46.92	64.99	220.728	242.88	415.072	99.54	102.09	220.266	200.46	414.931	40.4	74.12
220.685	228.15	416.122	52.11	66.42	416.166	82.35	87.52	221.349	254.27	416.242	99.43	105.07	220.886	199.65	416.099	37.3	57.24
221.305	224.98	417.29	54.88	65.64	417.334	123.55	83.49	221.969	268.21	417.414	97.34	103.55	221.507	204.01	417.267	36.43	51.36
221.923	221.83	418.458	51.67	65.67	418.504	89.24	70.93	222.588	270.42	418.586	101.44	105.69	222.128	204.38	418.435	35.6	48.88
222.543	218.94	419.626	51.38	63.01	419.674	66.41	64.7	223.206	261.14	419.754	101.57	107.13	222.748	203.51	419.603	36.4	46.98
223.163	223.91	420.794	51.74	62.9	420.842	55.34	66.21	223.823	250.28	420.922	99.52	106.6	223.368	210	420.775	34.75	47.32
223.784	225.13	421.962	52.66	64.04	422.01	51.49	71.85	224.443	244.83	422.09	97.79	107.31	223.989	227.94	421.943	38.19	48.31
224.405	232.24	423.13	55.25	64.14	423.178	49.15	68	225.065	240.77	423.258	100.6	106.33	224.609	354.93	423.111	36.73	73.58
225.024	258.15	424.298	52.88	64.64	424.348	48.36	63.04	225.685	239.55	424.428	99.8	106.14	225.23	432.87	424.279	41.09	155.59
225.643	268.78	425.466	52.98	66.07	425.518	47.74	68.13	226.305	242.98	425.596	100.65	105.54	225.852	498.46	425.447	115.05	159.89
226.263	268.95	426.634	51.31	63.97	426.69	52.77	73.21	226.926	245.61	426.764	100.43	103.97	226.472	533.67	426.615	122.55	106.98
226.883	257.41	427.802	51.72	65.21	427.86	120.68	93.79	227.544	253.5	427.934	100.6	105.44	227.094	529.62	427.787	90.6	74.76
227.503	245.15	428.97	52.16	66.48	429.03	94.7	85.63	228.165	254.36	429.102	98.68	104.08	227.714	542.62	428.957	63.86	57.62
228.123	234.09	430.14	50.4	64.69	430.198	68.11	74.73	228.785	252.09	430.27	107.73	103.7	228.334	534.93	430.127	50.74	51.38
228.742	224.38	431.31	53.7	65.59	431.368	56.25	67	229.405	247.71	431.439	107.52	103.79	228.954	535.31	431.297	43.39	47.86
229.36	218.57	432.482	58.5	67.12	432.536	51.26	63.88	230.025	245.35	432.611	100.9	103.04	229.574	498.93	432.465	39.39	45.59
229.979	212.9	433.65	144.56	66.08	433.704	47.84	68.55	230.646	254.39	433.781	99.49	103.89	230.195	448.68	433.633	37.97	46.5
230.599	210.85	434.818	150.34	66.15	434.872	45.44	69.49	231.267	257.2	434.949	98.01	101.39	230.816	387.78	434.801	37.13	44.33
231.219	217.97	435.988	140.19	66.85	436.042	46.95	64.28	231.887	257.43	436.117	97.37	101.96	231.436	340.06	435.969	37.06	44.01
231.839	229.81	437.157	161.14	69.21	437.212	47.62	71.42	232.508	266.37	437.285	102.53	101.8	232.057	303.8	437.137	38.35	44.03
232.46	232.61	438.325	109.25	66.63	438.38	98.75	81.88	233.128	258.38	438.453	98.59	101.56	232.677	276.54	438.307	37.2	44.83
233.08	241.63	439.493	87.72	68.48	439.548	115.22	94.01	233.748	246.77	439.621	99.5	101.23	233.297	254.83	439.479	35.67	45.52
233.699	246.72	440.663	73.49	65.52	440.716	83.08	77.91	234.368	239.74	440.789	102.61	102.35	233.917	240.18	440.647	35.79	46.52
234.319	240.58	441.831	66.6	67.83	441.884	62.71	70.32	234.985	237.85	441.957	98.87	101.22	234.538	227.91	441.815	35.95	45.64
234.94	231.76	443.001	61.62	70.69	443.052	53.23	71.51	235.605	250.84	443.127	98.48	102.81	235.16	217.8	442.983	35.69	46.47
235.557	221.15	444.169	58.52	71.43	444.22	50.38	68.92	236.226	270.01	444.293	100.19	101.72	235.78	210.27	444.151	37.27	59.69
236.176	217.18	445.337	54.56	72.28	445.388	49.11	67.96	236.846	265.42	445.461	98.95	104.59	236.403	206.31	445.319	40.36	60.22
236.796	216.57	446.505	53.74	69.14	446.56	47.61	69.26	237.467	252.89	446.629	100.12	101.96	237.023	206.45	446.487	37.98	51.29
237.414	222.86	447.673	51.62	66.9	447.728	46.65	71.06	238.087	240.61	447.797	98.44	101.82	237.645	211.64	447.659	37.03	47.22
238.034	221.67	448.845	52.44	67.2	448.896	47.92	70.83	238.707	239.98	448.965	96.54	100.55	238.262	209.98	448.829	37.08	46.34
238.654	219.4	450.017	50.63	66.97	450.064	70.74	70.55	239.325	246.81	450.135	95.85	98.86	238.882	206.34	449.997	36.98	46.91
239.273	216.04	451.185	49.23	70.24	451.234	122.28	74.62	239.946	248.5	451.305	98.65	99	239.5	203.42	451.165	39.3	46.87
239.893	211.77	452.353	49.38	72.11	452.402	94.32	80.14	240.566	242.97	452.475	101.23	102.9	240.121	200.6	452.333	36.76	47.86
240.51	218.58	453.521	50.09	75	453.57	67.81	69.55	241.183	251.1	453.643	98.05	99.74	240.742	198.2	453.501	37.43	45.64
241.13	242.08	454.689	52.3	70.62	454.738	56.43	63.82	241.803	254.4	454.811	96.76	100.37	241.363	195.84	454.67	37.72	48.51
241.75	265.85	455.859	50.57	68.87	455.908	51.07	65.9	242.423	245.83	455.979	97.17	101.15	241.983	194.46	455.838	37.8	145.6
242.371	261.7	457.027	50.14	69.63	457.076	49.01	75.78	243.045	240.69	457.147	99.03	102.01	242.603	194.59	457.006	102.02	180.06
242.992	253.53	458.195	51.17	68.34	458.244	47.2	72.94	243.665	238.97	458.315	96.91	103.22	243.223	197.4	458.178	123.83	149.9
243.611	243.11	459.365	51.79	64.53	459.414	48.69	63.56	244.285	233.26	459.485	98.29	102.32	243.84	201.93	459.346	126.92	102.7
244.23	237.95	460.533	52.24	68.59	460.582	47.68	63.9	244.906	233.16	460.657	100.46	105.65	244.457	201.07	460.514	86.65	72.26
244.85	232.28	461.701	53.02	66.81	461.752	47.62	69.76	245.523	250.54	461.825	103.52	102.18	245.078	201.68	461.682	65.55	58.05
245.469	231.24	462.871	53.37	66.57	462.922	47.41	61.63	246.143	264.49	462.993	97.8	102.96	245.699	202.21	462.85	51.13	51.04
246.089	231.12	464.039	53.19	64.66	464.094	46.79	63.19	246.762	259.81	464.161	95.63	101.31	246.319	203.96	464.018	43.37	47.43
246.709	226.65	465.207	53.41	64.42	465.263	48.93	63.77	247.383	247.71	465.331	94.68	103.86	246.939	205.81	465.186	40.53	45.74
247.328	223.85	466.375	52.47	65.15	466.431	48.42	67.04	248.003	244.7	466.499	98.14	100.42	247.559	208.11	466.354	38.27	46.07
247.948	223.28	467.545	54.06	65.01	467.599	86.04	80.5	248.621	252.41	467.667	96.99	101.82	248.179	210.57	467.522	38.03	44.88
248.569	223.6	468.713	56.56	64.95	468.767	124.2	90.86	249.241	262.24	468.837	96.08	101.7	248.801	214.08	468.69	37.19	44.99
249.189	220.14	469.881	54.4	67.37	469.937	120.26	74.07	249.86	266.89	470.007	97.58	103.87	249.422	219.49	469.858	35.42	46.12
249.809	217.26	471.049	52.99	79.93	471.107	82.82	66.38	250.478	263.15	471.175	98.9	103.24	250.039	224.49	471.026	35.94	46.07
250.429	216.38	472.217	53.97	162.19	472.277	64.62	64.58	251.098	255.16	472.343	96.49	103.01	250.66	226.38	472.196	36.23	47.92
251.049	218.3	473.387	55.41	128.99	473.449	55.1	74.54	251.718	246.2	473.511	98.05	102.1	251.281	222.45	473.364	36.76	46.75
251.667	219.15	474.555	56.39	97.3	474.617	49.4	66.9	252.339	245.03	474.681	103.81	104.06	251.901	223.59	474.532	37.4	52.06
252.288	219.77	475.723	55.22	80.75	475.785	47.16	66	252.959	248.85	475.849	98.42	100.98	252.524	221.42	475.702	38.69	113.88
252.908	230.92	476.893	54.05	71.45	476.953	47.29	80.96	253.58	251.57	477.017	94.67	102.29	253.144	235.58	476.87	65.51	170.1
253.529	244.98	478.061	53.77	67.2	478.121	45.52	84.53	254.2	248.31	478.185	95.13	100.37	253.761	302.92	478.04	121.36	144.95
254.149	253.74	479.229	56.94	63.6	479.289	46.26	72.35	254.821	242.73	479.355	93.72	100.78	254.382	429.97	479.208	104.79	93.27
254.769	248.5	480.397	56.78	64.28	480.457	47.53	71.92	255.441	244.59	480.523	92.72	101.47	255.002	476.93	480.376	76.77	68.77
255.387	253.9	481.567	58.43	63.92	481.629	52.69	62.97	256.059	249.1	481.691	97.1	102.93	255.623	505.03	481.546	54.21	56.64
256.004	248.87	482.735	55.22	62.38	482.797	50.29	72.04	256.68	258.08	482.859	100.21	103.44	256.244	534.06	482.714	46.85	49.44
256.625	248.79	483.903	53.26	63.34	483.965	48.68	79.46	257.298	254.56	484.027	100.4	103.55	256.864	544.61	483.884	41.91	47.72
257.245	244.97	485.071	56.25	64.47	485.133	49.76	78.29	257.919	254.95	485.199	100.03	102.52	257.484	533.35	485.054	40.32	47.34
257.863	269.59	486.243	57.04	61.81	486.301	50.92	69.34	258.539	258.6	486.367	95.84	100.79	258.104	528.12	486.222	37.41	45.86
258.484	454.15	487.411	59.55	63.87	487.469	99.26	71.5	259.159	259.88	487.535	95.44	99.56	258.721	524.49	487.39	36.35	45.63
259.104	540.87	488.579	58.32	63.27	488.637	114.97	66.81	259.78	257.22	488.704	99.63	99.83	259.343	459.57	488.558	35.96	45.37
259.724	565.11	489.747	57.41	63.68	489.805	84.12	63.09	260.4	252.12	489.872	97.12	100.48	259.964	398.58	489.726	36.91	45.79
260.344	593.28	490.915	55.77	61.8	490.975	63.47	65.58	261.021	246.68	491.04	92.47	100.72	260.585	343.85	490.896	36.17	47.5
260.964	610.66	492.085	56.91	61.8	492.143	53.65	81.77	261.642	248.51	492.208	98.76	103.55	261.203	302.13	492.066	36.24	47.52
261.581	620.32	493.253	58.72	63.86	493.311	50.06	88.21	262.262	255.49	493.376	99	101.3	261.823	270.52	493.234	37.37	54.74
262.199	610.79	494.423	58.32	65.9	494.479	49.57	81.89	262.882	250.83	494.548	98.44	99.32	262.443	247.7	494.404	37.44	147.42
262.816	617.52	495.592	59.73	63.7	495.647	48.3	76.8	263.502	246.18	495.72	94.91	100.68	263.061	231.97	495.572	39.43	117.37
263.439	590.52	496.76	59.08	63.5	496.815	45.08	64.71	264.12	241.64	496.888	95.61	100.7	263.682	219.41	496.74	38.2	79.93
264.061	616.22	497.928	57.08	139.63	497.985	46.66	60.74	264.74	247.52	498.056	98.16	102.77	264.303	213.46	497.908	37.11	62.91
264.681	587.34	499.096	56.65	155.58	499.155	48.09	64.8	265.359	261.57	499.224	95.06	101.17	264.924	207.81	499.078	36.81	54.75
265.303	526.75	500.264	63.13	107.1	500.325	52.68	72.98	265.98	263.81	500.392	95.62	101.96	265.542	202.86	500.246	37.03	50.74
265.927	477.4	501.434	167.06	83.96	501.493	121.3	88.99	266.6	261.67	501.56	97.57	99.87	266.163	196.92	501.416	36.94	49.26
266.551	581.23	502.604	150.04	73.36	502.661	108.36	73.64	267.22	256.36	502.728	97.5	100.12	266.785	193.31	502.586	36.85	47.79
267.176	572.02	503.774	119.69	65.99	503.831	78.17	76.25	267.839	268.59	503.898	99.78	100.68	267.405	193.02	503.754	35.65	47.05
267.798	567.23	504.946	96.37	65.26	504.999	60.87	78.59	268.457	270.4	505.066	97.39	100.76	268.025	192.29	504.922	36.69	46.39
268.423	590.39	506.114	78.55	63	506.167	53.5	71.4	269.078	260.49	506.234	93.57	98.49	268.645	191.04	506.09	38.32	46.73
269.046	596.62	507.282	67.97	62.65	507.337	49.71	69.24	269.698	252.35	507.404	97.28	100.09	269.266	194.56	507.259	36.77	47.85
269.67	591.07	508.45	61.45	59.91	508.505	47.49	73.87	270.316	242.88	508.572	99.87	100.04	269.887	196.48	508.427	37.64	49
270.291	558.26	509.618	56.99	60.82	509.675	48	66.36	270.937	233.32	509.74	95.68	98.66	270.508	194.49	509.597	49.73	154.87
270.91	534.65	510.786	55.9	61.78	510.843	49.46	64.18	271.555	230.31	510.908	94.25	100.21	271.128	190.34	510.767	118.74	160.37
271.531	487.86	511.956	55.48	58.29	512.011	47.24	71.14	272.175	239.54	512.076	92.67	100.27	271.749	188.18	511.935	128.32	106.96
272.15	434.22	513.126	53.63	62.01	513.179	47.4	69.9	272.795	251.31	513.244	94.31	101.46	272.367	187.89	513.103	105.36	74.96
272.772	384.94	514.294	52.97	60.51	514.347	50.97	64.71	273.417	258.1	514.414	98.48	100.48	272.988	186.11	514.271	71.82	58.88
273.397	345.44	515.464	53.63	59.41	515.515	117.5	80.67	274.034	250.92	515.586	96.74	101.3	273.606	189.05	515.439	55.34	51.75
274.018	312.85	516.632	54.62	62.08	516.683	114.49	91.5	274.654	247.16	516.754	94.12	101.79	274.227	190.63	516.607	46.15	46.42
274.638	289.72	517.8	53.84	64.18	517.851	80.6	75.72	275.275	249.29	517.922	93.39	100.57	274.848	197.82	517.779	41.49	46.03
275.258	273.97	518.968	55.37	63.02	519.021	61.3	68.1	275.895	242.04	519.09	92.84	99.71	275.466	208.13	518.947	40.11	46.72
275.877	263.14	520.138	54.8	63.02	520.189	52.65	66.99	276.517	238.25	520.258	96.05	100.02	276.086	206.62	520.117	37.96	44.92
276.497	252.88	521.31	58.96	61.22	521.357	50.9	67.59	277.137	236.26	521.426	98.58	101.4	276.707	201.98	521.287	37.6	45.67
277.118	241.23	522.478	126.82	65.6	522.527	48.22	69.14	277.757	243.3	522.596	97.05	98.49	277.329	198.3	522.455	37.79	46.09
277.739	232.91	523.646	141.83	63.8	523.7	48.83	70.36	278.378	260.76	523.766	94.35	98.06	277.951	197.39	523.623	37.9	47.1
278.359	226.07	524.816	105.77	63.81	524.868	48.31	64.52	278.998	258.21	524.936	92.92	97.59	278.572	257.98	524.791	38.39	45.86
278.979	220.8	525.984	82.07	63.69	526.038	48.19	74.34	279.619	250.14	526.104	91.59	97.97	279.192	406.76	525.961	36.07	46.34
279.599	217.83	527.152	68.81	63.4	527.208	52.24	80.14	280.239	251.1	527.272	91.99	100.28	279.813	441.09	527.131	35.56	51.65
280.219	218.45	528.32	61.76	63.57	528.378	116.16	76.13	280.86	245.15	528.44	96.24	98.38	280.431	502.19	528.301	37.21	139.13
280.839	220.59	529.488	56.98	66.59	529.546	109.77	69.67	281.478	237.17	529.608	99.63	99.26	281.052	521.07	529.469	42.22	110.61
281.46	221.62	530.658	54.89	66.97	530.714	78.63	74.58	282.098	234.12	530.776	97.69	98.98	281.673	535.41	530.637	38.97	76.3
282.08	220.93	531.828	52.35	63.67	531.882	59.37	78.21	282.718	237.39	531.948	95.17	95.77	282.294	526.95	531.805	38.44	60.15
282.698	226.9	532.996	54.63	64.51	533.052	53.27	76.73	283.338	259.63	533.12	98.64	100.08	283.324	497.47	532.973	37.4	51.91
283.318	223.97	534.164	52.26	65.16	534.22	50.45	73.33	283.958	272.05	534.288	96.58	98.65	283.944	440.4	534.141	36.36	49.17
283.936	220.42	535.332	52.68	64.91	535.388	47.47	77.35	284.578	256.28	535.456	95.24	99.19	284.567	386.77	535.309	36.85	46.84
284.556	217.15	536.5	51.33	66.21	536.556	47.18	69.93	285.199	248.02	536.624	102.13	98.79	285.19	334.3	536.477	36.86	47.52
285.177	212.7	537.668	52.27	63.15	537.724	46.84	61.12	285.82	252.55	537.792	102.11	98.95	285.81	295.09	537.645	35.58	47.67
285.797	213.68	538.836	51.8	69.72	538.892	49.66	68.67	286.438	250.26	538.96	97.04	98.99	286.43	265.6	538.815	36.59	47.36
286.416	210.98	540.006	51.94	65.74	540.06	120.16	79.97	287.058	243.05	540.128	93.02	97.79	287.05	243.83	539.985	36.12	45.32
287.037	212.08	541.176	51.23	65.26	541.232	100.67	70.12	287.678	244.25	541.296	91.49	97.42	287.671	227.95	541.153	38.1	54.61
287.655	212.91	542.348	52.56	63.8	542.402	72.48	66.23	288.298	251.67	542.469	93.88	97.87	288.293	216.14	542.321	38.55	131.03
288.275	211.5	543.518	52.21	63.56	543.574	56.57	71.23	288.919	254.99	543.637	93.52	97.31	288.913	207.88	543.491	101.04	161.78
288.895	207.68	544.69	52.67	63.91	544.742	49.57	66.89	289.54	250.87	544.805	97.8	96.39	289.533	202.06	544.659	123.16	149.06
289.515	207.35	545.86	52.09	63.56	545.91	48.38	62.47	290.161	242.38	545.973	92.63	96.55	290.154	198.14	545.827	129.18	107.74
290.135	245.84	547.028	53.63	65.99	547.078	49.16	63.52	290.782	233.27	547.141	94.31	97.3	290.775	196.58	546.997	101.11	78.28
290.754	448.69	548.197	52.78	66.79	548.246	46.14	63.89	291.402	230.48	548.309	90.72	99	291.395	194.83	548.169	70.32	64.59
291.374	509.32	549.367	54.7	65.51	549.414	47.38	67.2	292.02	231.73	549.477	93.57	96.53	292.015	193.11	549.337	54.02	55.4
291.995	531.97	550.537	55.88	63.98	550.582	48.2	72.6	292.64	248.79	550.645	94.08	97.56	292.636	191.98	550.505	46.91	52.92
292.616	580.78	551.705	55.35	65.15	551.75	49.76	70.43	293.258	272.3	551.817	93.04	96.59	293.256	192.3	551.673	42.4	49.13
293.234	584.83	552.873	54.81	64.46	552.92	54.36	71.23	293.878	275.1	552.985	102.36	97.76	293.874	192.77	552.841	40	48.31
293.854	595.99	554.041	55.21	63.01	554.09	121.11	89.87	294.499	271.05	554.153	100.55	96.52	294.492	191.47	554.009	39.23	47.58
294.474	594.88	555.209	53.98	66.96	555.258	112.46	90.49	295.119	258.7	555.321	91.96	95.74	295.112	189.65	555.177	36.33	46.74
295.094	578.78	556.377	55.82	68.3	556.426	79.1	76.51	295.739	246.46	556.489	89.77	95.8	295.734	187.91	556.345	37.54	46.27
295.715	557.62	557.547	54.56	67.35	557.594	61.45	65.15	296.359	241.87	557.659	89.2	92.37	296.354	193.01	557.515	36.95	46.32
296.336	496.68	558.721	55.45	65.03	558.762	51.6	63.46	296.98	235.97	558.827	91.95	94.87	296.974	193.79	558.683	36.67	57.76
296.955	434.54	559.893	55.96	64.99	559.93	50.01	64.35	297.6	230.09	559.997	89.76	96.92	297.594	196.86	559.851	35.5	54.1
297.575	379.04	561.063	57.75	64.66	561.098	48.81	74.71	298.221	231.63	561.167	90.95	94.6	298.215	195.83	561.019	36.58	49.83
298.196	335.09	562.231	60.44	63.81	562.266	48.2	71.2	298.841	248.94	562.335	89.86	96.66	298.835	194.7	562.187	36.39	45.88
298.815	300.3	563.401	62.93	65.99	563.434	47.53	65.31	299.462	268.84	563.503	93.94	96.97	299.456	190.23	563.357	34.98	47.44
299.435	274.12	564.573	61.21	63.79	564.604	47.93	67.6	300.083	264.95	564.671	92.57	97.54	300.076	188	564.525	36.24	48.63
300.055	254.72	565.741	57.37	66.69	565.772	51.31	82.77	300.703	252.28	565.845	91.15	93.99	300.696	187.41	565.693	35.66	48.67
300.675	240.07	566.911	56.38	66.39	566.94	105.38	82.69	301.323	240.33	567.015	88.68	93.19	301.318	189.66	566.861	36.37	47.49
301.294	230.89	568.079	53.69	66.53	568.108	119.2	80.72	301.943	233.25	568.187	98.65	94.57	301.938	197.28	568.03	36.48	49.85
301.916	223.93	569.247	53.61	65.29	569.276	87.11	70.24	302.563	240.81	569.359	101.29	97.25	302.56	201.03	569.197	37.62	52.86
302.536	218.52	570.415	55.37	65.16	570.446	61.86	65.19	303.184	246.42	570.529	93.86	94.37	303.181	212.94	570.366	40.2	51.87
303.156	214.37	571.583	53.71	64.38	571.618	53.96	63.06	303.802	247.99	571.697	86.7	95.74	303.802	219.42	571.536	40.18	52.49
303.776	214.14	572.751	56.91	62.64	572.788	49.43	66.96	304.422	261.02	572.865	87.21	94.93	304.423	217.41	572.706	39.42	57.6
304.396	213.35	573.921	54.86	62.95	573.96	49.53	65.42	305.043	275.01	574.033	90.26	93.16	305.043	210.92	573.876	42.41	170.16
305.015	210.93	575.089	57.75	63.01	575.128	47.52	63.02	305.663	270.83	575.203	87.3	92.97	305.661	205.49	575.044	118.61	182.32
305.634	208.5	576.257	58.23	62.34	576.296	47.09	67.07	306.28	259.09	576.373	87.88	94.75	306.281	196.71	576.212	126.16	161.37
306.255	213.05	577.427	56.97	65.09	577.464	45.48	80.59	306.897	250.8	577.545	91.77	95.36	306.901	192.08	577.38	106.05	124.3
306.876	215.26	578.595	56.75	67.36	578.632	47.78	79.88	307.518	242.29	578.713	89.42	91.73	307.522	188.89	578.548	72.53	79.88
307.494	248.77	579.763	58.84	66.95	579.801	74.16	73.43	308.135	245.28	579.881	90.24	93.36	308.142	187.95	579.716	55.66	60.4
308.112	349.09	580.931	56.89	68.33	580.969	124.95	89.85	308.753	245.48	581.049	88.7	93.05	308.759	186.2	580.884	46.01	52.94
308.732	487.15	582.099	56.43	64.15	582.139	101.17	83.41	309.373	240.96	582.217	89.9	92.48	309.38	186.97	582.052	42.55	49.44
309.352	537.16	583.269	57.8	63.92	583.307	72.16	76.84	309.994	246.81	583.385	93.18	93.14	310	184.54	583.222	39.56	47.04
309.972	542.39	584.437	62.1	65.14	584.475	58.81	64.74	310.614	252.78	584.553	109.25	94.62	310.621	185.63	584.39	37.4	48.4
310.593	580.41	585.607	152.92	65.22	585.643	52.3	63.69	311.235	250.39	585.723	94.4	93.6	311.242	188.18	585.558	36.81	48.71
311.214	578.27	586.775	151.27	64.9	586.811	49.87	68.54	311.852	248.64	586.893	84.56	92.2	311.862	185.99	586.726	37.09	46.61
311.831	583.43	587.943	115.15	64.7	587.979	46.98	75.6	312.47	254.02	588.061	84.81	92.08	312.483	183.06	587.894	37.13	48.19
312.451	593.55	589.111	91.88	65	589.147	48.2	65.76	313.091	252.3	589.233	89.83	92.45	313.104	181.76	589.062	37.06	45.49
313.071	566.22	590.279	79.82	64.5	590.317	46.93	62.88	313.71	249.65	590.403	84.82	92.69	313.725	180.64	590.232	36.66	47.58
313.691	503.85	591.447	69.47	63.68	591.487	49.46	67.19	314.329	240.84	591.573	86.13	91.53	314.345	180.74	591.404	36.69	47.72
314.31	448.16	592.615	63.87	65.85	592.655	55.98	94.07	314.949	238.45	592.741	87.6	92.54	314.965	182.52	592.574	34.81	46.98
314.93	389.31	593.785	60.1	66.04	593.823	108.72	83.59	315.569	244.11	593.909	85.79	91.91	315.585	199.2	593.744	36.17	48.43
315.552	341.27	594.955	57.89	72.53	594.991	116.17	70.47	316.187	248.47	595.077	86.11	91.27	316.205	297.03	594.912	36.08	47.23
316.171	305.21	596.123	58.17	166.87	596.159	82.26	67.28	316.809	256	596.249	89.64	91.94	316.825	405.88	596.08	35.59	48.7
316.789	277.08	597.291	55.48	147.79	597.327	62.26	62.09	317.429	253.45	597.421	87.23	90.86	317.445	404.06	597.248	36.63	51.98
317.409	257.87	598.459	55.65	108.86	598.497	53.38	62.24	318.05	243.7	598.591	85.47	89.86	318.066	487.81	598.416	36.24	53.28
318.029	244.72	599.627	56.06	86.09	599.669	49.92	60.24	318.671	236.63	599.759	92.62	89.44	318.686	522.69	599.586	39.62	157.6
318.649	234.67							319.292	234.42				319.306	510.33
319.269	224.97							319.913	236.26				319.924	529.44
319.888	219.61							320.534	260.47				320.544	500.03
320.508	216.31							321.154	274.34				321.164	519.24
321.129	213.06							321.773	278.54				321.782	455.9
321.749	209.97							322.392	269.34				322.402	395.16
322.366	209.35							323.013	257.74				323.023	337.68
322.986	207.89							323.634	251.48				323.644	295.73
323.604	204.32							324.255	250.92				324.264	264.01
324.222	202.54							324.874	249.93				324.881	242.43
324.841	202.51							325.492	257.53				325.501	225.99
325.461	203.43							326.11	267.22				326.122	212.45
326.083	207.44							326.728	265.6				326.742	204.2
326.703	206.32							327.349	258.12				327.363	198.54
327.322	205.5							327.969	262.04				327.984	193.09
327.942	212.19							328.59	261.88				328.604	191.43
328.563	211.52							329.21	257.33				329.224	191.16
329.183	211.64							329.83	251.37				329.841	186.33
329.803	210.2							330.45	245.82				330.459	182.95
330.424	208.1							331.071	243.35				331.079	181.31
331.044	208.36							331.692	243.76				331.701	181.08
331.662	209.81							332.313	258.73				332.321	180.47
332.282	222.15							332.934	271.7				332.942	178.71
332.902	438							333.551	265.55				333.563	178.19
333.522	511.47							334.171	249.8				334.183	178.55
334.141	543.97							334.792	242.26				334.804	179.31
334.759	565.27							335.412	238.41				335.424	183.98
335.378	590.44							336.032	249.94				336.044	188.98
335.996	599.98							336.651	251.97				336.665	189.6
336.616	579.65							337.271	250.63				337.285	186.06
337.236	583.05							337.892	252.89				337.906	184.34
337.856	587.11							338.513	249.14				338.526	184.44
338.476	531.43							339.133	254.19				339.147	184.77
339.096	464.7							339.754	252.91				339.763	185.48
339.714	403.81							340.374	240.54				340.385	187.26
340.334	354.65							340.994	234.54				341.005	187.6
340.954	314.44							341.613	235.37				341.626	185.53
341.574	285.76							342.234	248.85				342.247	183.62
342.194	267.14							342.855	264.5				342.868	182.93
342.814	251.18							343.476	253.11				343.489	182.32
343.434	238.33							344.096	250.2				344.109	184.04
344.054	226.59							344.716	244.72				344.729	185.18
344.671	221.93							345.34	240.82				345.35	184.53
345.29	216.11							345.96	234.5				345.971	184.67
345.907	216.75							346.581	228.24				346.591	183.56
346.527	218.59							347.202	227.12				347.212	183.59
347.145	220.3							347.823	237.05				347.833	185.04
347.765	222.8							348.444	265.67				348.453	188
348.386	231.87							349.064	265.78				349.073	192.37
349.005	229							349.684	261.16				349.692	194.15
349.625	226.78							350.304	257.62				350.312	190.48
350.244	218.7							350.922	259.83				350.929	186.51
350.862	216.39							351.542	256.07				351.549	185.58
351.482	212.94							352.163	251.37				352.17	187.51
352.102	214.12							352.784	255.76				352.791	184.96
352.719	220.49							353.405	261.12				353.41	185.91
353.339	226.91							354.025	251.07				354.03	194.57
353.958	228.08							354.643	245.96				354.651	193.12
354.577	227.98							355.263	245.98				355.269	186.51
355.197	231.86							355.881	241.21				355.889	182.05
355.817	229.07							356.502	232.12				356.509	178.8
356.436	225.11							357.123	229.45				357.129	175.18
357.056	221.04							357.744	230.3				357.747	177
357.675	215.82							358.364	239.61				358.367	177.79
358.296	212.06							358.984	250.24				358.987	181.26
358.916	210.97							359.606	254.27				359.607	183.44
359.537	208.23							360.226	257.12				360.229	183.96
360.155	205.7							360.846	253.8				360.849	186.09
360.775	204.93							361.467	246.36				361.472	188.11
361.395	208.23							362.086	244.53				362.093	190.51
362.015	210.11							362.707	235.93				362.713	193.61
362.635	207.39							363.327	236.09				363.333	190.36
363.256	209.67							363.947	245.27				363.954	186.56
363.875	212.54							364.567	268.99				364.574	183.86
364.494	213.44							365.187	269.7				365.192	182.59
365.114	236.41							365.805	255.88				365.813	179.08
365.734	432.58							366.425	247.5				366.43	179.86
366.354	526.75							367.046	239.73				367.048	178.42
366.975	556.47							367.667	228.68				367.668	177.87
367.594	575.48							368.287	221.63				368.288	175.98
368.213	596.25							368.907	223.74				368.908	175.25
368.832	607.28							369.527	235.71				369.529	177.12
369.45	592.47							370.149	251.84				370.149	199.6
370.07	597.58							370.77	273.02				370.768	376.97
370.69	596.05							371.391	268.46				371.388	450.57
371.31	583.62							372.012	254.87				372.009	506.73
371.93	520.35							372.633	240.47				372.626	524.15
372.549	462.53							373.254	232.43				373.246	539.15
373.169	403.57							373.874	228.54				373.866	547.57
373.79	359.41							374.495	232.99				374.487	526.17
374.41	320.45							375.115	248.06				375.106	548.81
375.03	292.93							375.735	267.17				375.726	494.41
375.65	270.42							376.356	268.07				376.343	425.48
376.27	250.55							376.977	254.62				376.963	362.63
376.891	239.62							377.597	243.26				377.583	313.94
377.512	229.08							378.214	236.39				378.203	279.53
378.133	222.32							378.834	235.91				378.823	252.63
378.752	218.84							379.451	238.87				379.443	233.99
379.372	221.07							380.071	233.3				380.064	221.24
379.993	227.66							380.691	228.79				380.684	210.95
380.613	232.1							381.312	226.94				381.305	202.51
381.233	239.52							381.933	249.04				381.927	195.1
381.851	248.76							382.553	260.82				382.547	190.44
382.472	253.84							383.173	260.54				383.167	189.07
383.091	246.81							383.794	247.75				383.788	186.74
383.709	240.15							384.414	236.02				384.408	185.26
384.329	230.97							385.036	229.53				385.029	182.97
384.949	224.73							385.656	231.69				385.652	183.14
385.568	220.07							386.277	249.04				386.272	181.88
386.188	220.34							386.898	261.46				386.892	180.91
386.805	216.05							387.518	261.83				387.512	179.68
387.424	214.28							388.136	254.53				388.132	179.91
388.043	212.54							388.757	239.54				388.752	178.98
388.664	210.58							389.378	235.68				389.373	178.54
389.282	210.46							389.998	233.7				389.993	178.88
389.902	210.22							390.619	235.7				390.614	177.77
390.522	209.79							391.24	256.41				391.234	179.2
391.141	209.92							391.861	266.52				391.854	181.52
391.761	207.84							392.481	255.84				392.476	182.69
392.38	213.16							393.102	243.52				393.097	178.72
393	214.36							393.722	236.64				393.717	178.65
393.62	218.99							394.34	229.57				394.339	176.73
394.24	219.84							394.961	225.96				394.955	174.22
394.859	241.33							395.582	229.52				395.577	173.79
395.479	457.91							396.203	241.89				396.198	173.04
396.1	529.23							396.823	244.2				396.819	174.71
396.72	565.12							397.443	242.66				397.438	174.98
397.339	589.87							398.063	237.82				398.059	177.13
397.958	599.58							398.681	237.34				398.678	177.83
398.578	598.07							399.303	235.4				399.299	177.1
399.195	602.37							399.924	252.27				399.92	175.62
399.815	596.63							400.543	268.68				400.54	175.54
400.435	558.97							401.162	265.03				401.16	174.33
401.053	512.48							401.782	255.09				401.781	171.81
401.672	454.93							402.399	247.68				402.401	170.14
402.292	397.59							403.02	242.76				403.021	177.21
402.909	350.27							403.64	247.54				403.64	183.73
403.529	313.12							404.26	253.63				404.26	180.8
404.152	283.35							404.881	254.87				404.881	176.89
404.772	264.04							405.502	243.45				405.502	174.86
405.39	251.19							406.122	245.28				406.12	174.11
406.007	240.38							406.743	245.95				406.742	175.13
406.625	231							407.363	248.3				407.362	177.42
407.246	223.2							407.981	257.09				407.986	179.26
407.866	220.75							408.599	258.56				408.61	182.65
408.484	215.03							409.22	257.27				409.231	185.06
409.103	216.37							409.84	256				409.85	189.69
409.724	216.12							410.461	243.05				410.475	185.5
410.344	216.91							411.085	229.49				411.094	180.43
410.967	218.68							411.707	225.01				411.718	176.63
411.588	223.88							412.329	225.19				412.343	175.2
412.208	223.36							412.948	239.73				412.968	173.99
412.828	223.64							413.572	243.44				413.594	172.33
413.448	219.09							414.197	239.2				414.219	170.92
414.066	213.65							414.822	245.78				414.841	170.93
414.686	210.02							415.447	252.54				415.461	171.26
415.306	211.17							416.072	249.78				416.083	174.23
415.925	209.71							416.696	244.85				416.707	174.86
416.546	206.35							417.32	232.88				417.327	177.57
417.164	203.27							417.939	225.85				417.951	176.55
417.784	205.19							418.561	223.42				418.576	173.73
418.405	278.25							419.183	234.41				419.201	172.74
419.025	461.78							419.808	240.37				419.826	172.42
419.643	519.7							420.433	241.91				420.45	174.12
420.262	543.96							421.055	235.35				421.072	175.16
420.882	574.05							421.677	226.84				421.692	173.08
421.5	583.59							422.301	226.12				422.314	171.79
422.121	588.97							422.925	232.75				422.938	171.32
422.741	586.28							423.55	247.83				423.561	170.75
423.361	540.49							424.173	253.33				424.183	170.96
423.984	480.69							424.796	244.69				424.808	171.44
424.604	416.48							425.421	237.37				425.43	174.23
425.225	363.62							426.044	230.53				426.055	175.67
425.846	322.03							426.666	224.97				426.675	174.76
426.463	291.56							427.286	224.87				427.298	178.32
427.082	266.02							427.906	226.16				427.923	174.65
427.702	247.41							428.528	243.3				428.548	171.61
428.322	233							429.153	270.54				429.171	168.71
428.942	224.33							429.776	283.22				429.791	168.25
429.561	217.98							430.395	268.51				430.413	169.46
430.181	210.75							431.017	249.57				431.035	168.37
430.8	210.63							431.642	235.63				431.658	169.61
431.418	214.34							432.264	228.06				432.282	172
432.038	218.5							432.886	222.18				432.905	170.79
432.656	214.56							433.51	219.74				433.53	172.49
433.277	211.09							434.135	222.16				434.155	172.5
433.893	207.39							434.757	230.21				434.779	173.52
434.513	203.32							435.381	237.27				435.403	173.4
435.131	202.24							436.005	258.64				436.022	171.41
435.75	203.8							436.63	269.26				436.647	171.04
436.371	206.26							437.252	260.41				437.269	170.01
436.992	203.4							437.877	245.48				437.889	169.5
437.612	204.4							438.503	234.67				438.514	169.61
438.228	203.6							439.125	229.46				439.139	170.25
438.849	211.49							439.75	229.21				439.761	169.5
439.468	213.26							440.374	234.75				440.383	169.13
440.086	213.5							440.998	237.78				441.003	171.01
440.706	211.68							441.623	239.21				441.623	173.73
441.327	213.82							442.247	239.28				442.245	173.22
441.947	212.98							442.87	239.2				442.867	173.36
442.567	228.39							443.495	233.1				443.491	173.64
443.187	270.05							444.114	226.56				444.115	171.96
443.808	414.65							444.739	226.4				444.739	169.57
444.428	514.54							445.359	236.43				445.363	169.01
445.049	557.46							445.981	251.36				445.985	168.56
445.668	568.84							446.601	262.58				446.609	168.98
446.287	583.96							447.222	257.71				447.234	169.02
446.907	571.04							447.843	246.91				447.859	169.45
447.526	583.08							448.466	240.28				448.484	170.23
448.146	583.51							449.091	231.96				449.106	169.43
448.765	525.38							449.714	222.97				449.728	169.8
449.384	456.16							450.334	219.08				450.352	171.12
450.004	401.01							450.958	226.67				450.975	172.12
450.623	349.46							451.582	237.74				451.593	170.48
451.241	309.97							452.204	252.1				452.218	169.14
451.863	279.8							452.829	260.88				452.842	168.32
452.483	255.99							453.448	260.48				453.463	173.79
453.1	238.85							454.073	255.83				454.082	181.76
453.718	226.95							454.697	258.96				454.703	182.7
454.336	222.98							455.321	254.26				455.324	178.51
454.954	217.19							455.943	247.62				455.946	175.32
455.575	211.74							456.568	238.59				456.571	174.85
456.195	208.2							457.192	231.63				457.195	171.18
456.815	208.23							457.817	233.52				457.817	169.8
457.433	211.26							458.44	241.2				458.439	169.02
458.052	209.36							459.059	252.65				459.061	168.76
458.672	211.78							459.683	264.33				459.683	168.14
459.293	213.87							460.308	258.47				460.305	168.11
459.912	224.68							460.93	247.81				460.929	169.39
460.532	239.63							461.552	234.95				461.554	177.03
461.152	259.25							462.177	225.76				462.174	183.79
461.77	284.32							462.801	227.43				462.796	181.9
462.388	459.17							463.426	242.64				463.418	177.8
463.009	504.09							464.051	257.17				464.038	173.87
463.63	544.01							464.673	260.82				464.663	171.54
464.249	570.17							465.298	263.84				465.285	170.33
464.868	575.45							465.918	256.18				465.908	169.07
465.488	580.06							466.54	243.01				466.528	169.1
466.108	557.67							467.161	237.6				467.149	168.01
466.727	503.4							467.781	236.45				467.769	167.8
467.348	446.4							468.4	234.38				468.392	170.63
467.968	388.96							469.024	231.64				469.011	170.27
468.587	340.51							469.648	225.73				469.633	170.32
469.206	300.21							470.272	232.31				470.257	168.04
469.824	270.38							470.894	244.35				470.88	166.31
470.444	251.22							471.516	253.88				471.502	166.53
471.064	237.01							472.14	256.33				472.125	166.18
471.684	223.17							472.762	256.43				472.75	166.52
472.302	216.14							473.386	250.04				473.374	166.89
472.923	208.33							474.008	245.73				473.993	166.58
473.542	207.68							474.633	240.63				474.613	166.7
474.162	205.5							475.258	235.19				475.235	166.37
474.783	206.18							475.882	233.52				475.855	164.59
475.403	206.67							476.507	230.21				476.476	164.4
476.023	208.36							477.129	230.15				477.096	164.38
476.642	216.71							477.754	230.63				477.717	168.26
477.262	218.98							478.379	233.31				478.338	169.86
477.883	230.03							479.004	256.3				478.958	169.68
478.5	247.21							479.626	255.18				479.578	169.77
479.118	246.45							480.251	241.44				480.199	170.41
479.737	244.48							480.873	235.62				480.818	169.57
480.357	235.91							481.498	234.57				481.439	168.34
480.977	226.07							482.117	230.07				482.06	170.4
481.597	216.88							482.739	229.36				482.681	171.79
482.217	208.64							483.361	233.96				483.301	172.41
482.837	205.69							483.983	250.44				483.921	172.09
483.456	204.29							484.603	264.19				484.541	170.56
484.075	201.54							485.227	251.35				485.161	171.92
484.694	199.99							485.848	236.15				485.782	172.55
485.314	195.49							486.468	226.55				486.402	172.99
485.935	197.58							487.087	225.96				487.023	171.73
486.555	196.96							487.708	227.94				487.645	169.29
487.175	205.17							488.329	231.67				488.265	171.48
487.794	213.1							488.949	243.21				488.885	173.28
488.415	223.35							489.569	248.92				489.506	171.44
489.036	223.29							490.191	243.65				490.126	169.21
489.656	220.85							490.812	238.19				490.747	167.54
490.276	214.52							491.432	244.88				491.367	165.86
490.896	212.78							492.053	252.3				491.987	167.27
491.516	212.71							492.676	245.64				492.607	170.57
492.134	207							493.294	231.24				493.227	176.92
492.755	207.85							493.911	222.64				493.847	180.85
493.375	205.56							494.531	217.82				494.469	179.63
493.994	204.89							495.152	213.92				495.089	174.63
494.611	210.58							495.772	212.21				495.71	173.21
495.231	300.42							496.393	212.49				496.331	171.74
495.851	483.65							497.014	225.38				496.952	172.25
496.471	544.38							497.635	249.17				497.57	169.94
497.091	565.63							498.253	270.92				498.192	169.65
497.712	592.85							498.873	258.55				498.813	170.69
498.332	604.41							499.494	240.31				499.433	170.4
498.95	606.05							500.114	230.32				500.054	167.32
499.569	589.9							500.735	229.32				500.675	167.61
500.189	605.19							501.356	237.07				501.296	168.58
500.81	563.73							501.975	261.95				501.917	168.81
501.43	495.91							502.596	266.97				502.537	172.08
502.049	444.08							503.216	260.51				503.157	172.17
502.669	388.86							503.838	260.61				503.777	173.64
503.288	343.7							504.46	260.63				504.397	174.19
503.908	309.17							505.082	262.07				505.017	174.52
504.527	280.62							505.707	244.38				505.638	172.25
505.147	260.08							506.331	231.74				506.258	171.48
505.766	245.33							506.956	226.48				506.88	169.45
506.386	235.62							507.578	228.45				507.499	170.66
507.003	229.54							508.2	243.28				508.119	170.62
507.624	224.35							508.819	268.55				508.742	172.25
508.245	220.97							509.443	275.19				509.361	172.23
508.865	223.29							510.067	267.36				509.982	174.27
509.484	219.79							510.692	257.45				510.603	174.76
510.104	227.23							511.314	248.04				511.224	174.04
510.722	233.82							511.939	240.49				511.843	172.75
511.342	233.2							512.563	241.1				512.466	169.92
511.962	225.21							513.185	242.13				513.087	168.21
512.583	214.16							513.807	236.63				513.707	167.54
513.202	207.19							514.429	237.01				514.327	167.04
513.822	204.14							515.054	247.74				514.947	167.66
514.442	206.09							515.673	253.26				515.568	166.14
515.062	205.35							516.298	246.29				516.191	168.2
515.682	204.16							516.922	237.48				516.811	167.75
516.301	201.48							517.544	230.9				517.431	169.61
516.918	202.57							518.166	225.92				518.051	170.02
517.539	209.93							518.79	227.81				518.671	174.84
518.158	207.93							519.412	244.23				519.293	176.94
518.778	217.48							520.03	250.66				519.914	175.05
519.398	226.67							520.655	244.13				520.534	171.78
520.021	246.4							521.28	237.96				521.155	169.26
520.639	255.72							521.905	230.37				521.775	167.97
521.258	250.87							522.529	240.78				522.395	167.13
521.877	235.54							523.151	251.12				523.015	166.77
522.498	222.85							523.773	256.93				523.636	167.5
523.117	212.53							524.395	254.09				524.257	166.74
523.737	208.91							525.016	235.83				524.875	168.69
524.356	205.58							525.635	221.62				525.494	175.63
524.976	202.06							526.257	213.33				526.116	180.33
525.597	199.22							526.876	214.95				526.736	180.48
526.217	199.54							527.498	225.94				527.356	177.34
526.838	203.02							528.12	248.38				527.976	174.77
527.456	218							528.737	259.6				528.596	171.53
528.073	255.93							529.361	266.23				529.216	168.99
528.693	291.85							529.983	255.48				529.837	166.15
529.31	477.56							530.603	251.8				530.458	165.91
529.93	528.75							531.228	246.57				531.078	164.63
530.551	549.86							531.848	239.09				531.698	164.03
531.168	580.14							532.47	231.72				532.319	164.53
531.788	590.38							533.095	223.45				532.94	164.03
532.406	595.65							533.714	217.49				533.562	163.08
533.026	589.99							534.339	216.33				534.183	164.65
533.646	540.87							534.964	218.32				534.804	167.38
534.266	483.17							535.589	233.36				535.425	169.57
534.885	426.12							536.212	258.21				536.045	173.16
535.504	371.03							536.832	258.23				536.662	175.74
536.123	327.51							537.456	250.9				537.282	176.46
536.743	295.39							538.08	242.57				537.902	176.23
537.364	271.96							538.703	231.3				538.521	171.51
537.984	251.48							539.325	225.43				539.141	169.45
538.604	237.54							539.95	235.81				539.762	165.98
539.224	231.49							540.575	239.64				540.382	164.94
539.844	228.73							541.194	246.82				541.004	164.37
540.464	219.21							541.816	247.65				541.624	162.71
541.084	212.87							542.438	241				542.245	162.76
541.705	207.82							543.06	237.43				542.865	164.62
542.325	204.95							543.685	233.04				543.486	166.86
542.945	208.64							544.309	239.62				544.107	169.18
543.564	214.42							544.928	248.88				544.728	170.77
544.184	215.38							545.553	244.28				545.346	171.07
544.805	214.77							546.178	235.4				545.966	167.93
545.427	212.65							546.802	224.24				546.586	166.94
546.045	208.74							547.426	222.38				547.206	165.99
546.664	207.2							548.05	226.28				547.827	164.73
547.282	209.38							548.672	235.68				548.447	164.51
547.904	217.55							549.291	251.15				549.068	170.41
548.524	215.01							549.917	263.64				549.688	171.94
549.144	225							550.542	262.86				550.309	169.67
549.763	355.8							551.162	251.37				550.929	166.96
550.382	495							551.785	240.05				551.55	164.95
551.001	530.49							552.406	225.73				552.17	163.99
551.621	560.5							553.027	216.03				552.791	165.17
552.241	590.6							553.646	216.92				553.41	169.04
552.861	602.02							554.271	229.89				554.031	167.86
553.481	597.85							554.894	250.78				554.652	164.8
554.099	571.13							555.519	261.13				555.272	164.56
554.719	599.13							556.143	264.18				555.892	164.62
555.339	574.27							556.767	251.78				556.512	164.57
555.959	502.95							557.391	233.58				557.132	165.54
556.58	440.54							558.016	223.3				557.752	166.12
557.2	385.64							558.638	215.29				558.371	167.84
557.82	339.19							559.261	214.89				558.992	169.83
558.44	304.32							559.886	223.05				559.613	168.85
559.058	276.96							560.511	239.37				560.233	168.81
559.679	256.27							561.128	251.4				560.853	168.05
560.3	240.07							561.75	258.35				561.47	170.98
560.919	228.59							562.374	263.34				562.092	171.88
561.538	221.22							562.996	251.93				562.714	174.84
562.158	217.27							563.615	237.42				563.334	174.96
562.778	215.06							564.237	224.72				563.954	171.75
563.398	213.98							564.86	217.53				564.576	170.86
564.017	214.24							565.481	215.61				565.195	166.17
564.638	211.63							566.105	219.12				565.816	164.03
565.256	213.36							566.729	232.93				566.436	164.07
565.875	210.92							567.349	255.63				567.057	163.94
566.495	212.69							567.971	257.3				567.678	166.22
567.115	217							568.596	240.82				568.298	164.66
567.735	220.25							569.219	228.08				568.919	165.22
568.355	220.17							569.838	217.54				569.539	167.64
568.974	214.93							570.46	216.98				570.159	172.91
569.594	209.33							571.082	230.68				570.779	173.99
570.215	209.16							571.704	240.59				571.399	170.28
570.836	209.36							572.328	246.09				572.019	166.43
571.456	205.17							572.953	249.43				572.64	165.09
572.074	205.14							573.573	239.61				573.26	165.18
572.694	207.58							574.198	227.93				573.881	164.48
573.314	213.43							574.823	224.62				574.501	166.68
573.934	213.98							575.443	235.28				575.121	168.53
574.555	216.49							576.067	238.44				575.741	170.46
575.173	226.92							576.691	234.34				576.36	171.35
575.792	224.32							577.308	237.37				576.98	170.06
576.412	230.28							577.931	235.68				577.6	167.64
577.032	225.99							578.55	228.74				578.221	166.8
577.651	221.1							579.173	231.39				578.842	167.64
578.272	214.99							579.798	239.61				579.464	175.29
578.892	211.24							580.423	243.34				580.084	297.89
579.511	212.01							581.045	242.17				580.704	412.27
580.13	221.08							581.669	235.72				581.324	469.44
580.749	220.16							582.289	230.4				581.945	499.19
581.369	220.32							582.913	226.62				582.566	525.13
581.989	219.33							583.532	232.59				583.187	514.72
582.608	219.63							584.156	238.61				583.807	528.34
583.228	226.24							584.781	242.91				584.428	480.86
583.847	224.82							585.401	249.49				585.045	456.27
584.467	220.63							586.02	244.46				585.665	501.35
585.088	217.34							586.642	231.08				586.285	436.91
585.708	216.23							587.265	228.13				586.908	372.54
586.328	210.24							587.889	237.22				587.528	319.59
586.946	206.99							588.514	245.86				588.149	280.68
587.564	203.6							589.136	252.97				588.769	252.6
588.184	203.58							589.758	261.76				589.389	234.65
588.805	206.09							590.38	261.92				590.009	219.41
589.425	208.12							590.999	253.25				590.631	207.8
590.044	208.36							591.619	238.49				591.251	197.96
590.664	210.72							592.243	228.12				591.871	190.49
591.283	214.45							592.865	218.77				592.49	186.19
591.901	225.79							593.484	216.42				593.111	184.71
592.521	230.66							594.103	225.41				593.731	186.11
593.142	231.12							594.727	248.55				594.351	186.01
593.759	225.94							595.346	265.55				594.971	180.84
594.378	222.06							595.97	266.75				595.591	177.06
594.996	215.99							596.592	257.62				596.214	173.76
595.616	212.62							597.214	243.37				596.835	170.5
596.236	212.84							597.839	230.97				597.457	169.01
596.856	215.08							598.463	220.54				598.078	167.49
597.476	217.15							599.088	215.69				598.698	166.97
598.095	220.85							599.712	213.76				599.319	166.04
598.715	224.48												599.939	165.8
599.333	228.36
599.954	248.61

## Sheet: Fig6CDE-timelapse
SMC								ICC								ICC/SMC
Before				Bleb10uM				Before				Bleb10uM				Before			Bleb10uM
Time [s]	#1 (EGFP)	#2 (EGFP)	#3 (EGFP)	Time [s]	#1 (EGFP)	#2 (EGFP)	#3 (EGFP)	Time [s]	#1 (EGFP)	#2 (EGFP)	#3 (EGFP)	Time [s]_b10	#1 (EGFP)	#2 (EGFP)	#3 (EGFP)	Time [s]	#1 (EGFP)	#2 (EGFP)	Time [s]	#1 (EGFP)	#2 (EGFP)
0.07	96.33	35.15	99.87	0	164.62	171.25	245.38	0.07	178.63	98.42	141.13	0	227.61	393.16	177.26	0.07	178.63	35.15	0	227.61	171.25
1.252	111.27	29.66	97.34	1.168	152.67	188.52	263.35	1.252	195.64	97.38	161.52	1.168	225.84	329.62	155.91	1.252	195.64	29.66	1.168	225.84	188.52
2.42	127.68	20.21	92.59	2.336	145.96	190.34	244.4	2.42	202.03	92.32	168.15	2.336	223.01	338.19	165.57	2.42	202.03	20.21	2.336	223.01	190.34
3.588	139.32	31.58	116.37	3.504	149.9	187.29	257.88	3.588	181.34	102.29	170.44	3.504	357.81	331.05	164.46	3.588	181.34	31.58	3.504	357.81	187.29
4.757	114.38	28.34	111.67	4.672	168.62	155.25	235.62	4.757	155.29	101.33	146.3	4.672	378.13	293.11	185.23	4.757	155.29	28.34	4.672	378.13	155.25
5.925	120.93	26.15	108.97	5.84	179.71	143.45	235.96	5.925	151.75	85.29	138.93	5.84	335.17	301.07	150.7	5.925	151.75	26.15	5.84	335.17	143.45
7.093	109.11	25.86	93.56	7.008	188.41	142.05	267.94	7.093	154.33	87.22	131.77	7.008	272.48	296.12	171.99	7.093	154.33	25.86	7.008	272.48	142.05
8.262	89.18	20.45	101.16	8.176	157.97	165.33	243.07	8.262	200.1	89.14	146.33	8.176	247.52	261.53	149.87	8.262	200.1	20.45	8.176	247.52	165.33
9.43	108.89	24.56	118.07	9.345	179.71	177.82	217.24	9.43	201.62	105.78	158.47	9.345	281.8	306.85	149.61	9.43	201.62	24.56	9.345	281.8	177.82
10.598	87.42	35.63	113.56	10.512	156.38	188.34	225.42	10.598	212.16	99.62	140.47	10.512	222.86	322.26	162.51	10.598	212.16	35.63	10.512	222.86	188.34
11.766	98.67	31.84	132.55	11.68	149.38	188.29	223.16	11.766	193.81	105.21	128.05	11.68	224.22	447	173.72	11.766	193.81	31.84	11.68	224.22	188.29
12.934	83.81	33.07	158.51	12.848	129.54	167.3	255.86	12.934	174.48	91.84	137.03	12.848	250.71	417.22	156.78	12.934	174.48	33.07	12.848	250.71	167.3
14.103	99.23	29.58	157.62	14.016	134.57	165.42	238.52	14.103	177.11	97.95	144.11	14.016	322.29	461.3	155.97	14.103	177.11	29.58	14.016	322.29	165.42
15.272	92.71	25.22	180.27	15.184	134.28	174.01	220.54	15.272	199.52	116.63	158.87	15.184	283.26	460.1	130.72	15.272	199.52	25.22	15.184	283.26	174.01
16.44	122.25	27.3	185.61	16.352	152.67	225.4	216.77	16.44	185.14	119.3	140.2	16.352	265.03	393.32	166.94	16.44	185.14	27.3	16.352	265.03	225.4
17.609	114.62	22.45	154.64	17.521	144.99	208.48	222.63	17.609	204.73	92.21	133.63	17.521	258.59	390.84	158.64	17.609	204.73	22.45	17.521	258.59	208.48
18.777	155.49	20.47	144.89	18.69	144.81	200.32	214.87	18.777	203.62	105.84	138.88	18.69	276.51	477.38	157.86	18.777	203.62	20.47	18.69	276.51	200.32
19.943	185.67	26.12	124.79	19.86	144.12	189.85	244.45	19.943	201.48	87.33	126.64	19.86	296.68	437.7	187.68	19.943	201.48	26.12	19.86	296.68	189.85
21.111	156.6	28.38	112.61	21.029	157.58	176.58	259.04	21.111	179.55	83.29	121.84	21.029	289.3	429.86	167.23	21.111	179.55	28.38	21.029	289.3	176.58
22.279	109.48	30.62	107.58	22.197	163.26	140.85	231.47	22.279	203.95	92.36	121.14	22.197	281.97	388.96	167.61	22.279	203.95	30.62	22.197	281.97	140.85
23.446	141.6	44.81	215.08	23.365	147.94	134.84	238.11	23.446	435.04	124.9	454.52	23.365	245.48	501.25	171.01	23.446	435.04	44.81	23.365	245.48	134.84
24.615	346.88	225.05	395.84	24.533	170.87	119.42	232.2	24.615	1018.47	311.03	1056.98	24.533	233.88	510.11	174.19	24.615	1018.47	225.05	24.533	233.88	119.42
25.783	321.92	268.32	425.45	25.701	156.03	130.51	265.74	25.783	966.04	370.29	943.54	25.701	241.78	403.48	161.8	25.783	966.04	268.32	25.701	241.78	130.51
26.951	281.81	188.05	370.98	26.87	166.9	112.79	271.61	26.951	846.3	362.96	527.21	26.87	252.51	397.42	156.71	26.951	846.3	188.05	26.87	252.51	112.79
28.119	309.96	112.04	288.69	28.039	198.33	135.88	276.58	28.119	558.9	248.45	241.56	28.039	249.07	405.68	159.13	28.119	558.9	112.04	28.039	249.07	135.88
29.287	246.4	61.37	243.49	29.207	191.62	155.01	236.76	29.287	422.32	190.03	137.47	29.207	246.88	344.19	154.28	29.287	422.32	61.37	29.207	246.88	155.01
30.455	193.11	42.92	196.96	30.376	155.43	163.89	245.47	30.455	279.16	142.45	119.19	30.376	248.87	352.73	157.29	30.455	279.16	42.92	30.376	248.87	163.89
31.623	138.05	35.33	167.9	31.544	145.43	175.01	205.28	31.623	222.38	130.05	123.13	31.544	256.12	386.96	155.97	31.623	222.38	35.33	31.544	256.12	175.01
32.791	132.51	36.78	136.67	32.712	156.62	207.99	220.42	32.791	230.82	95.67	116.16	32.712	249.9	313.22	193.55	32.791	230.82	36.78	32.712	249.9	207.99
33.96	86.14	37.75	124.81	33.88	133.52	196.29	231.51	33.96	200.18	106.96	117.23	33.88	250.06	359.51	162.52	33.96	200.18	37.75	33.88	250.06	196.29
35.127	109.18	25.05	100.14	35.048	149.07	192.81	202	35.127	193.96	104.14	112.22	35.048	268.96	406.33	159.75	35.127	193.96	25.05	35.048	268.96	192.81
36.296	90.79	29.45	113.93	36.216	149.28	192.75	208.26	36.296	166.49	89.97	120.26	36.216	244.09	429.14	154.41	36.296	166.49	29.45	36.216	244.09	192.75
37.464	99.07	36.21	96.36	37.385	183.39	173.27	200.81	37.464	176.93	85.99	129.96	37.385	230.09	423.79	145.28	37.464	176.93	36.21	37.385	230.09	173.27
38.63	69.92	34.89	99.22	38.554	170.29	206.55	208.4	38.63	167.42	97.74	125.37	38.554	230.8	374.11	151.22	38.63	167.42	34.89	38.554	230.8	206.55
39.798	94.88	26.66	93.24	39.723	143.26	200.37	202.43	39.798	174.74	85.29	127.22	39.723	325.3	406.22	145.88	39.798	174.74	26.66	39.723	325.3	200.37
40.966	97.42	26.18	94.11	40.891	149.04	168.6	201.7	40.966	156.58	100.59	133.29	40.891	386.48	412.1	164.19	40.966	156.58	26.18	40.891	386.48	168.6
42.134	136.68	27.44	97.03	42.057	155.26	160.04	216.7	42.134	156.56	109.27	117.23	42.057	378.17	449	168.46	42.134	156.56	27.44	42.057	378.17	160.04
43.303	132.1	36.92	102.6	43.225	160	185.55	212.94	43.303	167.34	86.58	120.16	43.225	329.26	454.45	170.28	43.303	167.34	36.92	43.225	329.26	185.55
44.47	155.58	27.36	86.82	44.391	157.3	180.23	197.28	44.47	152.99	97.04	124.1	44.391	270.58	396.74	163.29	44.47	152.99	27.36	44.391	270.58	180.23
45.639	148.81	29.38	108.34	45.559	174.32	207.34	242.1	45.639	168.71	86.07	142.94	45.559	273.84	402.78	164.88	45.639	168.71	29.38	45.559	273.84	207.34
46.805	138.01	28.73	98.95	46.728	158.28	180.77	223.62	46.805	172.75	92.55	163.64	46.728	263.46	417.86	152.23	46.805	172.75	28.73	46.728	263.46	180.77
47.973	125.66	37.32	103.96	47.897	156.45	186.37	221.89	47.973	159.38	99.9	148.54	47.897	240.9	363.73	168.99	47.973	159.38	37.32	47.897	240.9	186.37
49.141	118.38	34.18	96.4	49.065	191.45	193.55	214.01	49.141	180.93	99.97	164.16	49.065	259.61	342.99	159.84	49.141	180.93	34.18	49.065	259.61	193.55
50.309	100.42	32.38	97.49	50.233	159	157.53	235.7	50.309	168.71	94.41	138.72	50.233	297.04	385.51	159.7	50.309	168.71	32.38	50.233	297.04	157.53
51.476	89.56	27.62	103.45	51.401	146.62	165.05	205.26	51.476	168.21	82.47	129.73	51.401	307.06	390.03	180.9	51.476	168.21	27.62	51.401	307.06	165.05
52.645	72.64	25.73	103.08	52.569	159.19	189.75	218.64	52.645	138.25	87.11	120.38	52.569	316.51	410.47	150.88	52.645	138.25	25.73	52.569	316.51	189.75
53.812	82.23	21.3	117.98	53.737	151.22	183.16	206.34	53.812	167.15	78.82	133.76	53.737	339.17	420.62	177.3	53.812	167.15	21.3	53.737	339.17	183.16
54.98	74.92	30.21	102.59	54.905	153.41	147.1	199.93	54.98	153.32	93.88	139.21	54.905	297.61	384.14	159.81	54.98	153.32	30.21	54.905	297.61	147.1
56.146	100.04	29.41	94.39	56.074	135.99	161.85	244.35	56.146	150.11	85.71	134.91	56.074	328.39	399	172.45	56.146	150.11	29.41	56.074	328.39	161.85
57.314	102.29	26.51	117.56	57.241	136.17	173.82	241.44	57.314	171.1	94.93	178.75	57.241	275.16	388.4	155.54	57.314	171.1	26.51	57.241	275.16	173.82
58.482	167.48	31.78	98.98	58.409	144.16	186.53	254.01	58.482	152	95.51	174.74	58.409	305.52	339.38	163.64	58.482	152	31.78	58.409	305.52	186.53
59.65	171.1	29.01	112.29	59.577	160.35	172.7	216.79	59.65	174.48	93.55	198.4	59.577	312.29	391.37	161.19	59.65	174.48	29.01	59.577	312.29	172.7
60.819	156.68	26.26	120.44	60.745	168.57	191.96	218.93	60.819	149.7	105.14	170.12	60.745	284.57	388.78	150.68	60.819	149.7	26.26	60.745	284.57	191.96
61.988	118.48	33.36	98.84	61.913	158.22	168.95	215.53	61.988	154.18	101.16	138.98	61.913	265.61	375.34	171.61	61.988	154.18	33.36	61.913	265.61	168.95
63.155	86.53	26.93	101.87	63.081	171.22	149.71	222.93	63.155	176.78	94.92	145.52	63.081	271.12	396.01	177.81	63.155	176.78	26.93	63.081	271.12	149.71
64.323	107.81	29.08	91.33	64.249	161.72	128.6	196.73	64.323	171.23	90.75	145.04	64.249	274.19	460.71	167.86	64.323	171.23	29.08	64.249	274.19	128.6
65.491	106.88	28.74	102.71	65.418	162.81	132.26	218.89	65.491	178.12	87.79	141.88	65.418	350.03	451.79	173.29	65.491	178.12	28.74	65.418	350.03	132.26
66.659	87.07	24.48	106.91	66.587	164.16	117.32	206.03	66.659	161.27	86.14	141.14	66.587	326.16	442.9	151.74	66.659	161.27	24.48	66.587	326.16	117.32
67.827	97.55	27.66	95.42	67.755	141.99	108.97	197.62	67.827	161.23	88.14	149.02	67.755	278.64	442.41	164.03	67.827	161.23	27.66	67.755	278.64	108.97
68.995	82.71	28.79	101.58	68.923	145.65	109.79	223.09	68.995	152.74	88.77	125.11	68.923	252.14	448.85	167.39	68.995	152.74	28.79	68.923	252.14	109.79
70.163	84.44	29.36	121.66	70.091	149.26	115.1	286.14	70.163	170.29	77.71	146.99	70.091	252.96	395.59	184.8	70.163	170.29	29.36	70.091	252.96	115.1
71.332	108.88	30.32	96.32	71.26	165.9	142.53	266.51	71.332	195.62	101.18	144.66	71.26	251.77	376.84	164	71.332	195.62	30.32	71.26	251.77	142.53
72.499	92.05	29.78	102.95	72.428	164.96	141.62	307.92	72.499	191.45	89.42	134.79	72.428	265.1	371.96	163.09	72.499	191.45	29.78	72.428	265.1	141.62
73.667	97.85	30.86	103.31	73.596	151.88	150.6	293.48	73.667	192.62	90.78	138.56	73.596	261.65	395.49	166.35	73.667	192.62	30.86	73.596	261.65	150.6
74.835	117.58	26.82	101.67	74.764	160.67	137.12	237.32	74.835	190.68	83.84	137.98	74.764	239.48	375.86	164.67	74.835	190.68	26.82	74.764	239.48	137.12
76.004	107.04	26.38	115.3	75.932	135.87	153.48	198.93	76.004	153.48	83.07	131.01	75.932	220.04	368.67	162.3	76.004	153.48	26.38	75.932	220.04	153.48
77.172	82.16	32.45	110.88	77.1	140.04	156.55	203.57	77.172	153.56	76.62	129.6	77.1	229.87	397.41	144.45	77.172	153.56	32.45	77.1	229.87	156.55
78.34	89.67	23.77	103.11	78.268	128.03	148.01	236.87	78.34	153.77	81.78	131.57	78.268	263.64	439.52	164.64	78.34	153.77	23.77	78.268	263.64	148.01
79.509	96.53	34.73	106.33	79.436	125.77	161.07	235.86	79.509	167.88	93.07	125.11	79.436	307.35	419.74	158.39	79.509	167.88	34.73	79.436	307.35	161.07
80.678	89.78	29.03	102.93	80.607	124.97	207.12	212.85	80.678	135.7	87.36	139.45	80.607	279.25	434.7	156.91	80.678	135.7	29.03	80.607	279.25	207.12
81.846	91.81	33.05	109.98	81.774	119.61	238.96	188.24	81.846	164.71	92.71	133.42	81.774	296.72	466.95	158.1	81.846	164.71	33.05	81.774	296.72	238.96
83.014	103.08	27.85	125.9	82.943	124.17	247.48	211.08	83.014	155.88	94.66	133.75	82.943	270.07	446.18	147.65	83.014	155.88	27.85	82.943	270.07	247.48
84.182	94.82	26.63	95.91	84.111	135.12	264.25	204.04	84.182	143.07	89.67	128.6	84.111	263.81	385.18	191.67	84.182	143.07	26.63	84.111	263.81	264.25
85.349	76.32	24	101.88	85.279	134.83	247.44	216.34	85.349	163.37	95.19	162.13	85.279	274.26	392.37	172.48	85.349	163.37	24	85.279	274.26	247.44
86.517	80.48	27.86	98	86.447	125	289.38	260.97	86.517	154.84	90.1	129.09	86.447	298.35	348.85	140.06	86.517	154.84	27.86	86.447	298.35	289.38
87.685	97.63	14.86	113.34	87.615	140.23	248.05	221.08	87.685	153.05	85.14	139.94	87.615	271.58	457.1	161.3	87.685	153.05	14.86	87.615	271.58	248.05
88.854	96.33	28.67	100.14	88.783	138.87	228.82	196.93	88.854	158.85	80.68	148.47	88.783	265.32	403.36	142.68	88.854	158.85	28.67	88.783	265.32	228.82
90.023	106.33	22.77	118.47	89.952	122.7	177.18	195.58	90.023	154.25	99.6	144.74	89.952	281.33	347.3	156.12	90.023	154.25	22.77	89.952	281.33	177.18
91.191	292.74	105.63	295.26	91.119	142.94	145.85	197.49	91.191	808.3	255.78	857.07	91.119	265.59	341.63	149.77	91.191	808.3	105.63	91.119	265.59	145.85
92.361	481.79	250.11	427.42	92.287	136.22	123.19	202.25	92.361	1084.42	366.99	1067.42	92.287	291.91	310.12	168.74	92.361	1084.42	250.11	92.287	291.91	123.19
93.527	447.25	291.32	482.86	93.455	140.65	133.56	171.24	93.527	1032.37	404.74	920.24	93.455	281.3	288.42	147.81	93.527	1032.37	291.32	93.455	281.3	133.56
94.693	400.14	244.78	454.14	94.623	128.06	130.27	199.2	94.693	973.95	425.59	613.25	94.623	292.52	302.08	156.38	94.693	973.95	244.78	94.623	292.52	130.27
95.862	318.3	163.08	389.15	95.791	134.96	155.15	186.45	95.862	790.44	344.44	278.15	95.791	265.64	363.73	162.14	95.862	790.44	163.08	95.791	265.64	155.15
97.03	278.19	83.12	334.66	96.959	127.99	156.03	181.52	97.03	494.36	271.42	149.99	96.959	246.07	395.45	163.78	97.03	494.36	83.12	96.959	246.07	156.03
98.199	230.49	67.88	286.43	98.127	140.93	173.11	182.29	98.199	354.82	169	118.8	98.127	243.25	379.44	185.43	98.199	354.82	67.88	98.127	243.25	173.11
99.368	155.63	45.55	247.45	99.295	133.09	177.85	205.13	99.368	255.32	134.44	121.58	99.295	245.13	370.47	157.13	99.368	255.32	45.55	99.295	245.13	177.85
100.536	106.97	35.37	210.2	100.462	126.61	188.79	193.7	100.536	197.67	132.15	121.21	100.462	235.36	391.11	158.48	100.536	197.67	35.37	100.462	235.36	188.79
101.704	134.38	35.3	186.21	101.631	122.14	166.67	238.65	101.704	193.21	102.29	115.87	101.631	265.96	393.49	159.06	101.704	193.21	35.3	101.631	265.96	166.67
102.872	153.89	44.49	165.59	102.799	132.2	161.48	243.71	102.872	178.25	98.42	126.15	102.799	305.36	386.34	167.17	102.872	178.25	44.49	102.799	305.36	161.48
104.04	118.12	36.12	158.72	103.967	124.43	143.11	253.02	104.04	164.44	101.86	135.9	103.967	310.94	391.93	146.74	104.04	164.44	36.12	103.967	310.94	143.11
105.209	137.15	39.96	129.92	105.135	122.8	149.73	223.16	105.209	179.12	101.38	136.89	105.135	317.74	382.44	141.75	105.209	179.12	39.96	105.135	317.74	149.73
106.376	148.41	27.59	137.77	106.303	127.17	127.07	207.72	106.376	151.59	100.75	133.93	106.303	292.42	321.19	149.13	106.376	151.59	27.59	106.303	292.42	127.07
107.544	121.18	31.03	154.09	107.471	119.61	145.23	220.65	107.544	172.95	93.1	161.98	107.471	335.45	324.15	162.35	107.544	172.95	31.03	107.471	335.45	145.23
108.712	130.25	38.19	118.88	108.639	124.65	114.48	214.85	108.712	162.81	86.62	145.45	108.639	277.1	298.05	168.75	108.712	162.81	38.19	108.639	277.1	114.48
109.88	102.89	26.38	131.35	109.806	134.55	121.42	178.53	109.88	165.25	115.42	152.12	109.806	271	309.73	173.58	109.88	165.25	26.38	109.806	271	121.42
111.048	101.44	29.9	123.55	110.972	118.25	138.36	190.42	111.048	169.45	120.04	167.28	110.972	256.9	327.27	168.33	111.048	169.45	29.9	110.972	256.9	138.36
112.216	120.56	37.77	117.43	112.141	136.49	123.53	203.7	112.216	184.3	115.68	163.13	112.141	259.3	334.45	173.26	112.216	184.3	37.77	112.141	259.3	123.53
113.384	125.45	28.81	111.18	113.309	110.65	129.95	188.46	113.384	185.25	90.03	157.55	113.309	285.41	351.56	172.75	113.384	185.25	28.81	113.309	285.41	129.95
114.553	110.05	41.38	114.88	114.477	122.2	128.07	191.52	114.553	183.82	97.23	138.19	114.477	245.23	342.67	153.64	114.553	183.82	41.38	114.477	245.23	128.07
115.72	139.26	38.73	113.65	115.645	137.1	137.82	184.53	115.72	185.12	96.37	153.2	115.645	254.78	323.9	167.87	115.72	185.12	38.73	115.645	254.78	137.82
116.888	127.7	28.12	113.15	116.811	131.52	144.75	188.55	116.888	216.03	98.59	139.67	116.811	239.32	284.41	153.38	116.888	216.03	28.12	116.811	239.32	144.75
118.056	156.1	36.58	127.74	117.98	119.35	165.4	197.8	118.056	193.9	98.19	141.07	117.98	251.88	278.07	147.03	118.056	193.9	36.58	117.98	251.88	165.4
119.224	114.67	31.86	117.86	119.147	109.2	170.81	179.8	119.224	191.62	88.15	134.65	119.147	257.87	334.23	153.41	119.224	191.62	31.86	119.147	257.87	170.81
120.392	101.34	24.47	124.31	120.316	111.57	150.03	188.29	120.392	170.92	74.71	128.68	120.316	268.26	379.29	143.48	120.392	170.92	24.47	120.316	268.26	150.03
121.56	98.49	30.38	136.45	121.484	111.1	195.32	219.81	121.56	175.78	93.3	105.76	121.484	285.45	392.04	146.94	121.56	175.78	30.38	121.484	285.45	195.32
122.728	97.68	29.42	141.56	122.65	118.96	197.12	228.34	122.728	166.34	87.08	137.79	122.65	278.74	429.27	141.16	122.728	166.34	29.42	122.65	278.74	197.12
123.897	74.22	31.96	137.75	123.818	122.74	204.73	204.15	123.897	152.45	83.95	115.18	123.818	227.14	462.23	147.29	123.897	152.45	31.96	123.818	227.14	204.73
125.064	92.21	26.53	117.07	124.986	133.64	163.38	180.66	125.064	163.08	100.64	119.47	124.986	228.58	427.23	138.35	125.064	163.08	26.53	124.986	228.58	163.38
126.232	94.22	25.37	117.07	126.154	122.16	177.18	177.43	126.232	182.95	97.88	132.03	126.154	179.39	371.86	157.33	126.232	182.95	25.37	126.154	179.39	177.18
127.4	95.23	30.18	120.29	127.322	122.14	144.95	214.49	127.4	185.85	82.38	136.96	127.322	225.16	323.74	139.39	127.4	185.85	30.18	127.322	225.16	144.95
128.568	75.66	30.63	121.34	128.489	111.14	155.96	212.09	128.568	196.33	99.44	165.34	128.489	240.67	351.7	163.88	128.568	196.33	30.63	128.489	240.67	155.96
129.736	88.4	34.75	107.78	129.658	143.8	137.95	193.69	129.736	228.38	86.92	163.28	129.658	229.55	299.53	183.71	129.736	228.38	34.75	129.658	229.55	137.95
130.904	83.33	32.27	100.66	130.826	124.28	160.85	189.07	130.904	205.95	98.79	148.68	130.826	222.93	340.77	160.77	130.904	205.95	32.27	130.826	222.93	160.85
132.072	82.93	30.01	151.3	131.994	114.46	114.44	188.74	132.072	191.14	89.15	125.74	131.994	270.01	348.55	145.9	132.072	191.14	30.01	131.994	270.01	114.44
133.24	90.79	30.99	178.15	133.162	110.45	143.64	179.28	133.24	183.52	92.08	121.35	133.162	250.75	408.92	155.03	133.24	183.52	30.99	133.162	250.75	143.64
134.407	103.32	33.08	241.37	134.33	125.91	168.15	183.52	134.407	155.16	97.18	139	134.33	253.2	457.89	162.25	134.407	155.16	33.08	134.33	253.2	168.15
135.576	94.82	29.56	284.3	135.498	109.22	156.33	201.97	135.576	157.73	83.25	139.26	135.498	288	479.34	173.42	135.576	157.73	29.56	135.498	288	156.33
136.744	87.79	39.47	236.53	136.666	107.71	195.92	234.59	136.744	155.7	90.03	146.03	136.666	344.36	421.1	157.67	136.744	155.7	39.47	136.666	344.36	195.92
137.912	112.3	49.32	304.78	137.833	134.26	178.73	267.73	137.912	303.56	85.27	428.58	137.833	303.45	349.42	155.55	137.912	303.56	49.32	137.833	303.45	178.73
139.08	466.05	238.58	535.73	139.002	121.22	157.11	242.52	139.08	1102.01	346.44	1031.78	139.002	281.39	400.84	159.06	139.08	1102.01	238.58	139.002	281.39	157.11
140.248	486.63	262.93	554.85	140.17	146.77	160.08	247.7	140.248	1062.37	381.36	1040.06	140.17	263.35	402.79	138.99	140.248	1062.37	262.93	140.17	263.35	160.08
141.416	416.68	259.08	556.6	141.338	123.28	144.1	258.72	141.416	1041.99	399.08	907.06	141.338	259	442.03	137.83	141.416	1041.99	259.08	141.338	259	144.1
142.584	335.45	233.85	521.19	142.507	113.87	168.1	236.31	142.584	968.3	391.53	596.9	142.507	239.87	484.81	145.42	142.584	968.3	233.85	142.507	239.87	168.1
143.752	278.29	161.4	468.06	143.675	106.57	141.73	199.41	143.752	742.14	259.07	286.82	143.675	220.93	438.01	140.35	143.752	742.14	161.4	143.675	220.93	141.73
144.921	205.07	93.81	368.79	144.844	111.38	119	184.68	144.921	479.34	167.97	164.54	144.844	229.39	468.56	155.97	144.921	479.34	93.81	144.844	229.39	119
146.089	171.95	53.27	288.88	146.012	106.3	126.42	198.28	146.089	333.33	124.37	124.78	146.012	222.35	438.58	134.68	146.089	333.33	53.27	146.012	222.35	126.42
147.257	121.75	54.33	231.25	147.18	114.62	135.92	192.39	147.257	219.96	109.66	136.68	147.18	226.13	393.56	127.81	147.257	219.96	54.33	147.18	226.13	135.92
148.425	92.45	34.3	209.02	148.347	128.12	157.7	193.3	148.425	228.95	92.55	101.19	148.347	198.58	464.38	137.45	148.425	228.95	34.3	148.347	198.58	157.7
149.593	92.14	35.74	179.43	149.515	130.97	138.89	224.41	149.593	193.23	106.16	124.41	149.515	211.55	413.53	153.57	149.593	193.23	35.74	149.515	211.55	138.89
150.759	90.07	24.53	163.24	150.682	126.62	155.81	207.46	150.759	188.97	92.45	139.35	150.682	226.97	418.47	134.06	150.759	188.97	24.53	150.682	226.97	155.81
151.928	97.9	38.25	145.44	151.851	123.19	125.26	221.57	151.928	182.92	100.56	125.38	151.851	208.97	389.22	146.71	151.928	182.92	38.25	151.851	208.97	125.26
153.095	91.89	28.84	125.33	153.02	149.64	131.49	238.89	153.095	154.07	87.16	110.63	153.02	223.72	394.73	153.86	153.095	154.07	28.84	153.02	223.72	131.49
154.262	72.89	32.48	128.48	154.186	121.32	128.88	253.25	154.262	179.36	97.81	104.81	154.186	225.65	393.11	153.03	154.262	179.36	32.48	154.186	225.65	128.88
155.43	102.41	27.03	147.77	155.356	127.75	131.66	265.27	155.43	176.99	94.3	130.72	155.356	233.26	432.01	142.04	155.43	176.99	27.03	155.356	233.26	131.66
156.598	109.1	32.84	139.72	156.523	112.01	136.93	219.32	156.598	183.84	84.05	131.27	156.523	208.67	470.59	148.16	156.598	183.84	32.84	156.523	208.67	136.93
157.766	97.75	33.04	126.1	157.691	104.52	156.34	213.55	157.766	206.58	82.08	138.67	157.691	255.16	431.63	170.28	157.766	206.58	33.04	157.691	255.16	156.34
158.934	73.52	32.92	112.04	158.859	99.87	137.14	231.31	158.934	181.93	85.85	127.57	158.859	214	445.51	140.19	158.934	181.93	32.92	158.859	214	137.14
160.102	96.03	33.07	112.15	160.027	98.54	140.47	244.81	160.102	164.92	82.27	175.96	160.027	220.46	482.59	140.46	160.102	164.92	33.07	160.027	220.46	140.47
161.27	368.47	176.59	268.85	161.196	87.13	149.79	257.88	161.27	968.37	241.89	924.59	161.196	236.57	511.16	148.16	161.27	968.37	176.59	161.196	236.57	149.79
162.437	360.66	221.51	414.89	162.365	106.26	142.21	269.52	162.437	979.52	282.21	919.71	162.365	277.39	437.84	168.84	162.437	979.52	221.51	162.365	277.39	142.21
163.605	341.93	218.22	418.32	163.533	111.43	160.93	315.36	163.605	1046.81	266.1	872.9	163.533	284.43	382.03	154.43	163.605	1046.81	218.22	163.533	284.43	160.93
164.773	281.92	240.93	415.32	164.701	112.96	202.63	333.46	164.773	1023.89	294.9	688.73	164.701	266.29	449.58	153.94	164.773	1023.89	240.93	164.701	266.29	202.63
165.941	228.42	167.62	346.03	165.872	119.2	219.25	303.27	165.941	789.68	273.78	345.85	165.872	243.19	411.93	168.65	165.941	789.68	167.62	165.872	243.19	219.25
167.112	188.75	97.88	295.26	167.044	102.68	219	286.21	167.112	536.49	191.01	174.98	167.044	226.61	413.71	148.65	167.112	536.49	97.88	167.044	226.61	219
168.278	121.49	59.67	221.15	168.212	97.67	220.32	267.95	168.278	351.51	152.34	136.51	168.212	224.01	468.62	147.54	168.278	351.51	59.67	168.212	224.01	220.32
169.446	113.63	36.48	193.34	169.38	86.7	223.38	244.97	169.446	249.32	122.68	124.65	169.38	211.83	454.77	139.55	169.446	249.32	36.48	169.38	211.83	223.38
170.615	88.73	36.01	168.31	170.548	105.12	219.89	246.6	170.615	209.38	123.36	134.26	170.548	248.46	424.3	158.72	170.615	209.38	36.01	170.548	248.46	219.89
171.783	100.59	39.04	182.91	171.717	115.41	227.15	219.24	171.783	180.45	102.95	127.99	171.717	248.38	425.08	160.55	171.783	180.45	39.04	171.717	248.38	227.15
172.951	91	38.62	161.23	172.884	94.71	183.32	244.16	172.951	159.75	111.44	124.01	172.884	227.2	437.53	148.17	172.951	159.75	38.62	172.884	227.2	183.32
174.119	83.85	34.07	172.77	174.052	82.57	167.45	257.55	174.119	171.68	116.97	125.32	174.052	260.23	425.96	169.83	174.119	171.68	34.07	174.052	260.23	167.45
175.286	89.89	38.97	197.21	175.218	97.64	160.27	249.1	175.286	181.73	109.78	123.23	175.218	226.45	452.7	151.1	175.286	181.73	38.97	175.218	226.45	160.27
176.455	89.1	29.23	225.46	176.386	93.04	136.44	246.36	176.455	204.73	102.75	136.13	176.386	244.12	491.64	172.83	176.455	204.73	29.23	176.386	244.12	136.44
177.624	95.95	40.34	210.38	177.554	100.81	146.16	233	177.624	190.88	91.71	131.68	177.554	224.81	438.03	165.49	177.624	190.88	40.34	177.554	224.81	146.16
178.79	83	31.99	162.05	178.724	94.39	143.27	238.85	178.79	166.05	89.48	129.02	178.724	222.77	479.89	128.49	178.79	166.05	31.99	178.724	222.77	143.27
179.958	86.1	27.59	159.18	179.892	94.46	123.12	226.44	179.958	165.58	97.75	129.15	179.892	237.91	394.48	149.91	179.958	165.58	27.59	179.892	237.91	123.12
181.126	75.12	28.18	122.23	181.061	105.19	160.77	193.72	181.126	171.47	91.67	160.95	181.061	242.61	376.19	140.93	181.126	171.47	28.18	181.061	242.61	160.77
182.294	79.53	26.96	132.29	182.228	101	148.16	201.95	182.294	163.53	84.48	160.24	182.228	233.62	390.12	137.58	182.294	163.53	26.96	182.228	233.62	148.16
183.462	113.93	37.6	109.42	183.397	99.83	105.86	200.82	183.462	177.23	86.04	174.8	183.397	231.41	368.6	123.77	183.462	177.23	37.6	183.397	231.41	105.86
184.63	92.12	28.3	118.74	184.563	85.26	131.7	200.09	184.63	168.67	97.86	171.08	184.563	221.67	384.23	129.28	184.63	168.67	28.3	184.563	221.67	131.7
185.798	100.36	28.45	116.44	185.729	91.9	151.71	191.77	185.798	182.04	72.58	135.08	185.729	245.25	338.78	138.39	185.798	182.04	28.45	185.729	245.25	151.71
186.967	102.29	26.44	124.63	186.897	99.46	187.95	220.91	186.967	166.75	81.34	117.68	186.897	280.91	280.78	123.8	186.967	166.75	26.44	186.897	280.91	187.95
188.136	75.16	32.36	123.38	188.065	94.19	191.71	202.72	188.136	172.63	99.22	141.59	188.065	422.86	272	135.46	188.136	172.63	32.36	188.065	422.86	191.71
189.304	86.15	29.12	114.32	189.233	84.77	199.3	223.13	189.304	187.81	98.88	128.87	189.233	367.68	257.18	147	189.304	187.81	29.12	189.233	367.68	199.3
190.472	95.56	34.93	114.79	190.402	82.99	216.74	245.69	190.472	197.4	94.53	162.05	190.402	249.88	294.05	136.81	190.472	197.4	34.93	190.402	249.88	216.74
191.64	96.15	29.92	148.69	191.569	79.83	212.07	230.48	191.64	292.95	96.14	195.54	191.569	247.75	410.97	123.78	191.64	292.95	29.92	191.569	247.75	212.07
192.808	103.18	35.16	153.2	192.738	81.7	204.67	232.89	192.808	247.27	107.15	174.76	192.738	223.49	441.42	130.59	192.808	247.27	35.16	192.738	223.49	204.67
193.976	123.75	34.55	165.51	193.904	88.93	173.32	246.09	193.976	263.74	97.81	148.04	193.904	220.96	433.56	134.71	193.976	263.74	34.55	193.904	220.96	173.32
195.144	114.22	31.53	146.27	195.072	96.25	214.75	220.51	195.144	211.4	90.75	116.66	195.072	244.32	377.62	128.54	195.144	211.4	31.53	195.072	244.32	214.75
196.311	110.37	26.62	110.39	196.24	102.55	195.01	207.27	196.311	206.89	82.47	131	196.24	270.09	472.33	143.33	196.311	206.89	26.62	196.24	270.09	195.01
197.477	124.66	29.07	108.77	197.412	97.14	191.74	232.18	197.477	187.36	99.34	128.72	197.412	252.7	439.14	145.91	197.477	187.36	29.07	197.412	252.7	191.74
198.646	122.16	24.77	144.62	198.581	103.12	170.86	235.78	198.646	202.82	103.18	136	198.581	215.01	347.21	119.45	198.646	202.82	24.77	198.581	215.01	170.86
199.814	136.9	33.49	125.31	199.749	89.94	143.4	234.57	199.814	195.07	111.27	156.89	199.749	212.77	349.16	159.68	199.814	195.07	33.49	199.749	212.77	143.4
200.982	116.66	39.11	109.4	200.916	87.04	149.63	210.48	200.982	220.92	87.53	180.9	200.916	230.71	394.68	140.32	200.982	220.92	39.11	200.916	230.71	149.63
202.15	99.77	31.7	97.51	202.085	74.06	141	206.56	202.15	186.49	94.63	142.44	202.085	205.91	436.27	131.03	202.15	186.49	31.7	202.085	205.91	141
203.318	94.51	34.29	105.25	203.253	86.71	180.4	205.68	203.318	170.52	124.86	141.32	203.253	210.33	342.26	140.68	203.318	170.52	34.29	203.253	210.33	180.4
204.486	82.59	31.7	108.7	204.421	93.49	233.22	213.39	204.486	186.16	109.1	138.38	204.421	195.68	388.59	137.75	204.486	186.16	31.7	204.421	195.68	233.22
205.654	72.75	26.55	109	205.589	90.7	180.44	220.06	205.654	179.86	103.21	141.4	205.589	221.2	396.93	132.3	205.654	179.86	26.55	205.589	221.2	180.44
206.822	79.7	26.27	123.28	206.757	81.01	173.04	194.49	206.822	183.12	138.62	149.81	206.757	203.06	375.1	125.86	206.822	183.12	26.27	206.757	203.06	173.04
207.992	76.4	31.88	139.24	207.925	83.33	174.86	208.47	207.992	181.32	112.38	149.03	207.925	219.43	383.82	156.64	207.992	181.32	31.88	207.925	219.43	174.86
209.16	88.68	33.62	138.95	209.094	70.86	166.62	221.77	209.16	164.56	119.89	165.01	209.094	224.57	356.67	156.42	209.16	164.56	33.62	209.094	224.57	166.62
210.328	103.44	33.96	180.85	210.261	73.61	146.12	233.19	210.328	155.19	137.82	161.69	210.261	232.67	430.89	153.23	210.328	155.19	33.96	210.261	232.67	146.12
211.496	115.92	31.92	207.27	211.43	91.17	132.33	280.94	211.496	211.44	112.37	298.36	211.43	234.88	408.82	146.7	211.496	211.44	31.92	211.43	234.88	132.33
212.664	484.55	233.03	423.42	212.599	85.01	111.64	349.72	212.664	1035.51	315.49	1006.12	212.599	272.41	402.26	139.14	212.664	1035.51	233.03	212.599	272.41	111.64
213.832	430.42	322.99	533.49	213.765	91.25	133.55	289.71	213.832	1032.11	366.1	1024.32	213.765	226.59	420.67	142.64	213.832	1032.11	322.99	213.765	226.59	133.55
214.999	334.3	337.7	535.59	214.934	79.1	105	283.18	214.999	1006.77	384.89	921.72	214.934	211.67	393.9	157.46	214.999	1006.77	337.7	214.934	211.67	105
216.166	272.44	314.56	498.7	216.102	96.2	97.26	276.43	216.166	1028.11	414.38	690.86	216.102	222.13	421.99	138.22	216.166	1028.11	314.56	216.102	222.13	97.26
217.334	255.05	199.38	395.72	217.27	80.86	81.89	275.39	217.334	787.15	358.44	339.21	217.27	213.59	370.34	142.78	217.334	787.15	199.38	217.27	213.59	81.89
218.502	250.37	116.33	298.86	218.438	78.03	90.96	231.41	218.502	608.93	211.93	180.47	218.438	228.72	314.08	125.38	218.502	608.93	116.33	218.438	228.72	90.96
219.67	193.74	59.11	240.98	219.605	97.19	108.96	319.14	219.67	423.29	146.71	153.52	219.605	222.04	299.19	141.06	219.67	423.29	59.11	219.605	222.04	108.96
220.838	164.34	44.56	230.42	220.773	87.13	111.03	331.75	220.838	303.23	106.27	132.88	220.773	228.55	294.88	131.75	220.838	303.23	44.56	220.773	228.55	111.03
222.006	125.6	30.14	189.68	221.941	90.19	97.67	272.08	222.006	236.34	87.01	116.1	221.941	203.23	318.63	134.17	222.006	236.34	30.14	221.941	203.23	97.67
223.174	109.59	24.58	176.1	223.109	89.49	111.96	245.56	223.174	221.07	92.37	115.04	223.109	220.26	337.1	151.09	223.174	221.07	24.58	223.109	220.26	111.96
224.341	115.33	30.71	160.24	224.277	91.86	130.66	280.86	224.341	183.89	81.14	134.68	224.277	188.2	367.68	129.88	224.341	183.89	30.71	224.277	188.2	130.66
225.51	106.73	28.81	215.34	225.445	76.09	155.45	259.96	225.51	167.78	92.47	109.62	225.445	194.35	398.71	151.39	225.51	167.78	28.81	225.445	194.35	155.45
226.678	120.29	28.27	219.44	226.613	89.04	131.96	240	226.678	174.99	79.12	131.38	226.613	244.71	393.85	150.67	226.678	174.99	28.27	226.613	244.71	131.96
227.846	96.3	27.29	171.52	227.781	80.78	143.26	212.76	227.846	168.79	101.71	136.64	227.781	229.48	355.64	171.33	227.846	168.79	27.29	227.781	229.48	143.26
229.014	77.37	24.38	153.7	228.948	83.45	135.42	203.38	229.014	189.27	91.7	165.02	228.948	236.81	294.79	156.83	229.014	189.27	24.38	228.948	236.81	135.42
230.182	90.92	18.92	184.52	230.116	78.19	140.03	199.21	230.182	149.78	90.82	130.87	230.116	274.3	286.15	144.86	230.182	149.78	18.92	230.116	274.3	140.03
231.35	71.26	34.97	201	231.284	85.12	134.66	226.21	231.35	193.25	84.47	130.63	231.284	255.51	276.04	145.55	231.35	193.25	34.97	231.284	255.51	134.66
232.518	92.85	23.21	179.94	232.451	87.07	122.08	212.68	232.518	187.51	90.84	130.37	232.451	255.23	237.73	155.07	232.518	187.51	23.21	232.451	255.23	122.08
233.685	79.84	27.78	140.81	233.62	84.94	127.52	210.54	233.685	174.14	82.66	138.86	233.62	249.25	263.84	147.99	233.685	174.14	27.78	233.62	249.25	127.52
234.854	80.22	25.7	137.02	234.788	70.25	122	255.46	234.854	177.16	88.7	138.67	234.788	249.38	298.56	145.16	234.854	177.16	25.7	234.788	249.38	122
236.022	86.18	22.15	119.59	235.956	84.14	122.03	254.01	236.022	166.3	97.92	123.78	235.956	244.03	313.19	143.9	236.022	166.3	22.15	235.956	244.03	122.03
237.19	78.04	28.26	106.58	237.124	84.94	138.75	336.29	237.19	174.32	99.75	129.23	237.124	243.86	395.79	165.94	237.19	174.32	28.26	237.124	243.86	138.75
238.358	86.9	30.38	106.8	238.291	99.2	137.56	279.15	238.358	171.33	76.4	152.44	238.291	255.72	418.93	153.38	238.358	171.33	30.38	238.291	255.72	137.56
239.526	96.14	24.75	118.19	239.459	93.67	138.67	273.48	239.526	203.99	104.07	151.87	239.459	272.3	485.62	137.42	239.526	203.99	24.75	239.459	272.3	138.67
240.694	82.95	35.96	111.98	240.627	94.87	145.01	249.87	240.694	184.05	81.1	139.25	240.627	232.33	461.58	128.83	240.694	184.05	35.96	240.627	232.33	145.01
241.864	84.95	28.88	112.24	241.795	86.42	145.3	200.06	241.864	209.19	91.42	153.28	241.795	218.06	499.26	153.01	241.864	209.19	28.88	241.795	218.06	145.3
243.031	93.77	22.42	109.91	242.963	84.68	130.84	198.8	243.031	199.82	86.29	148.94	242.963	213.55	489.01	132.14	243.031	199.82	22.42	242.963	213.55	130.84
244.2	111.14	30.93	96.81	244.13	94.13	149.79	176.94	244.2	181.78	86.33	135.18	244.13	207.59	469.86	143.38	244.2	181.78	30.93	244.13	207.59	149.79
245.368	99.07	35.62	92.94	245.298	83.3	163.42	201.78	245.368	224.27	86.95	159.14	245.298	211.57	509.23	142.28	245.368	224.27	35.62	245.298	211.57	163.42
246.536	123.77	27.93	108.12	246.466	86.03	138.55	202.44	246.536	208.12	88.33	143.12	246.466	192.97	476.36	154.38	246.536	208.12	27.93	246.466	192.97	138.55
247.704	168.19	28.82	102.27	247.633	67.59	151.88	226.71	247.704	200.04	91.08	127.13	247.633	177.42	405.12	129.8	247.704	200.04	28.82	247.633	177.42	151.88
248.872	194.44	26.16	190.14	248.801	96.55	138.52	248.03	248.872	234.23	92.22	169.57	248.801	199.48	438.12	150.17	248.872	234.23	26.16	248.801	199.48	138.52
250.04	422.25	164.04	372.75	249.969	72.39	162.08	235.89	250.04	1075.58	171.42	894.53	249.969	219.81	406.45	129.19	250.04	1075.58	164.04	249.969	219.81	162.08
251.208	361.84	303.03	459.65	251.137	75.42	155.89	242.66	251.208	1037.53	341.41	1021.64	251.137	205.45	353.78	140.1	251.208	1037.53	303.03	251.137	205.45	155.89
252.375	278.73	338.01	481.08	252.305	64.23	138.99	227.12	252.375	1018.1	346.81	964.24	252.305	221.48	406.6	138.72	252.375	1018.1	338.01	252.305	221.48	138.99
253.542	251.71	304.84	473.25	253.472	81.52	147.23	228.81	253.542	953.27	366.19	649.39	253.472	210.91	398.48	138.16	253.542	953.27	304.84	253.472	210.91	147.23
254.71	229.41	176.15	359.93	254.641	91.59	136.84	249.67	254.71	770.67	271.85	302.27	254.641	223.33	375.45	140.99	254.71	770.67	176.15	254.641	223.33	136.84
255.878	214.74	79.58	277.71	255.807	91.8	131.64	298.09	255.878	572.41	216	164.14	255.807	236.17	437.38	142	255.878	572.41	79.58	255.807	236.17	131.64
257.049	163.47	54.75	216.3	256.975	80.29	107.85	284.28	257.049	397.97	136.62	128.64	256.975	238.09	417.84	136.8	257.049	397.97	54.75	256.975	238.09	107.85
258.218	131.18	48.48	173.64	258.143	66.42	102.62	260.35	258.218	322.63	119.37	119.35	258.143	233.35	429.7	143.81	258.218	322.63	48.48	258.143	233.35	102.62
259.386	130.92	41.9	148	259.311	91.46	113.96	235.04	259.386	255.11	108.51	142.38	259.311	250.58	413.47	153.7	259.386	255.11	41.9	259.311	250.58	113.96
260.554	146.89	26.34	116.3	260.479	62.28	113.59	240	260.554	195.63	93.78	103.32	260.479	207.33	425.45	127.14	260.554	195.63	26.34	260.479	207.33	113.59
261.72	105.03	31.93	104.41	261.648	77.22	102.25	221.3	261.72	153.33	88.58	118.49	261.648	251.06	419.08	149.29	261.72	153.33	31.93	261.648	251.06	102.25
262.888	97.86	36.21	98.36	262.816	75.87	111.16	215.36	262.888	186.66	92.49	140.31	262.816	248.84	386.33	151.59	262.888	186.66	36.21	262.816	248.84	111.16
264.056	116.62	32.47	94.64	263.985	59.97	104.33	228.2	264.056	193.16	81.74	170.38	263.985	265.1	445.18	137.1	264.056	193.16	32.47	263.985	265.1	104.33
265.224	127.37	31.32	108.82	265.153	76.97	101	213.19	265.224	182.25	85.88	142.79	265.153	249.16	473.05	130.7	265.224	182.25	31.32	265.153	249.16	101
266.392	115.75	32.23	90.53	266.321	73.46	119.27	233	266.392	204.4	85.74	148.69	266.321	224.51	439.4	150.32	266.392	204.4	32.23	266.321	224.51	119.27
267.561	95.89	28.78	92.81	267.489	70.22	102.58	274.62	267.561	170.74	85.75	138.35	267.489	183.33	456.53	130.65	267.561	170.74	28.78	267.489	183.33	102.58
268.728	101.79	37.07	105.78	268.657	74.93	154.71	235.03	268.728	181.25	77.74	154.91	268.657	232.9	499.36	128.35	268.728	181.25	37.07	268.657	232.9	154.71
269.897	112.12	23.25	98.92	269.825	81.26	137.37	234.61	269.897	178.55	91.86	139.74	269.825	206.03	500.03	152.12	269.897	178.55	23.25	269.825	206.03	137.37
271.064	95.37	27.19	97.95	270.994	69.74	150.77	212.7	271.064	181.07	92.73	171.94	270.994	285.49	467.92	129.75	271.064	181.07	27.19	270.994	285.49	150.77
272.232	82.41	22.86	119.9	272.161	66.13	157.25	198.04	272.232	197.36	87.51	156.12	272.161	253.43	399.53	140.55	272.232	197.36	22.86	272.161	253.43	157.25
273.4	96.64	20.36	139.69	273.331	84.65	156.12	219.43	273.4	200.53	119.95	166.07	273.331	230.99	394.45	145.03	273.4	200.53	20.36	273.331	230.99	156.12
274.568	112.14	31.99	123.66	274.498	82.8	132.62	238.85	274.568	203.07	106.66	165.18	274.498	231.17	356.15	137.54	274.568	203.07	31.99	274.498	231.17	132.62
275.737	176.27	23.81	141.79	275.666	76.88	140.05	242.95	275.737	188.52	88.01	170.47	275.666	239.28	426.37	133.41	275.737	188.52	23.81	275.666	239.28	140.05
276.906	182.56	25.29	156.63	276.834	81.39	132.01	229.16	276.906	226.36	80.29	158.89	276.834	237.57	417.33	137.84	276.906	226.36	25.29	276.834	237.57	132.01
278.073	271.03	89.81	325.67	278.002	90.14	142.34	194.44	278.073	699.85	170.49	647.61	278.002	206.87	389.26	137.55	278.073	699.85	89.81	278.002	206.87	142.34
279.241	364.21	232.37	443.42	279.17	92.14	137.16	186.55	279.241	1055.62	308.25	986.77	279.17	210.14	485.34	134.06	279.241	1055.62	232.37	279.17	210.14	137.16
280.407	329.82	325.82	542.45	280.338	63.09	161.36	191.45	280.407	944.51	312.05	930.85	280.338	189.99	465.6	137.46	280.407	944.51	325.82	280.338	189.99	161.36
281.575	244.77	324.59	522.91	281.509	70.8	135.73	246.74	281.575	1015.49	361.15	769.92	281.509	168.32	436.85	123.78	281.575	1015.49	324.59	281.509	168.32	135.73
282.743	211.07	229.59	439.81	282.678	79.01	148.04	207.74	282.743	910.41	339.79	421.37	282.678	199.87	455.18	135.42	282.743	910.41	229.59	282.678	199.87	148.04
283.911	191.48	105.79	376.24	283.849	65.57	120.21	238.43	283.911	720.26	213.93	197.3	283.849	220.68	517.07	137.88	283.911	720.26	105.79	283.849	220.68	120.21
285.08	159.3	60.33	294.64	285.017	80.28	123.55	252.89	285.08	577.14	146.03	128.6	285.017	213.71	380.86	141.93	285.08	577.14	60.33	285.017	213.71	123.55
286.248	121.14	39.11	252.85	286.185	78.7	130.75	263.2	286.248	414.63	123.14	135.1	286.185	239.43	384.64	156.55	286.248	414.63	39.11	286.185	239.43	130.75
287.414	109.3	35.81	187.27	287.357	92.13	122.44	260.51	287.414	313.56	113.75	114.19	287.357	261.45	455.26	138.23	287.414	313.56	35.81	287.357	261.45	122.44
288.583	95.04	35.67	143.24	288.525	67.72	110.14	228.44	288.583	277.37	107.93	122.86	288.525	302.07	429.77	149.74	288.583	277.37	35.67	288.525	302.07	110.14
289.751	65.21	30.26	127.74	289.694	69.1	115.1	220.58	289.751	262.29	90.86	118.42	289.694	267.57	420.34	153.38	289.751	262.29	30.26	289.694	267.57	115.1
290.919	84.41	26.38	111.31	290.861	69.65	116.1	238.41	290.919	242.77	99.89	143.94	290.861	251.2	421.45	133.09	290.919	242.77	26.38	290.861	251.2	116.1
292.087	86.68	28.68	109.45	292.032	67.41	126.79	241.25	292.087	209.51	104.15	143.74	292.032	213.54	441.44	156.16	292.087	209.51	28.68	292.032	213.54	126.79
293.253	79.82	33.37	100.6	293.201	73.01	152.9	202.68	293.253	208.14	78.79	133.14	293.201	210.19	449.23	149.71	293.253	208.14	33.37	293.201	210.19	152.9
294.421	90.58	30.66	122.22	294.369	65.41	173.7	186.8	294.421	269.26	93.27	133.66	294.369	233.54	421.23	133.42	294.421	269.26	30.66	294.369	233.54	173.7
295.59	119.05	36.32	122.67	295.537	66.9	175.52	197.84	295.59	304.45	90.21	165.32	295.537	211.99	401.34	142.75	295.59	304.45	36.32	295.537	211.99	175.52
296.757	159.23	27.81	110.56	296.705	62.68	166.75	216.08	296.757	233.96	86.96	139.57	296.705	238.99	345.49	140.41	296.757	233.96	27.81	296.705	238.99	166.75
297.926	151.64	28.66	117.24	297.873	69.91	145.3	253.37	297.926	218.37	109.88	121.3	297.873	230.33	329.97	120.01	297.926	218.37	28.66	297.873	230.33	145.3
299.093	112.59	23.33	123.71	299.041	87.2	145.75	257.13	299.093	187.33	96.81	135.24	299.041	196.38	376.14	135.77	299.093	187.33	23.33	299.041	196.38	145.75

## Sheet: Fig6F-timelapse
Time_C	0 µM	0 µM	Time_5	5 µM	5 µM	Time_10	10 µM	10 µM
0.07	178.63	0	0	310.37	0	0	227.61	0
1.252	195.64	17.01	1.169	229.47	-80.9	1.169	225.84	-1.77
2.42	202.03	23.4	2.338	203.58	-106.79	2.338	223.01	-4.6
3.588	181.34	2.71	3.507	366.75	56.38	3.507	357.81	130.2
4.757	155.29	-23.34	4.675	460.66	150.29	4.675	378.13	150.52
5.925	151.75	-26.88	5.843	402.3	91.93	5.843	335.17	107.56
7.093	154.33	-24.3	7.011	331.83	21.46	7.011	272.48	44.87
8.262	200.1	21.47	8.179	249.88	-60.49	8.179	247.52	19.91
9.43	201.62	22.99	9.347	185.76	-124.61	9.347	281.8	54.19
10.598	212.16	33.53	10.516	165.88	-144.49	10.516	222.86	-4.75
11.766	193.81	15.18	11.684	189.3	-121.07	11.684	224.22	-3.39
12.934	174.48	-4.15	12.852	205.93	-104.44	12.852	250.71	23.1
14.103	177.11	-1.52	14.02	174.17	-136.2	14.02	322.29	94.68
15.272	199.52	20.89	15.188	163.55	-146.82	15.188	283.26	55.65
16.44	185.14	6.51	16.356	186	-124.37	16.356	265.03	37.42
17.609	204.73	26.1	17.524	244.13	-66.24	17.524	258.59	30.98
18.777	203.62	24.99	18.692	586.91	276.54	18.692	276.51	48.9
19.943	201.48	22.85	19.86	683.33	372.96	19.86	296.68	69.07
21.111	179.55	0.92	21.026	595.02	284.65	21.026	289.3	61.69
22.279	203.95	25.32	22.194	478.54	168.17	22.194	281.97	54.36
23.446	435.04	256.41	23.364	330.67	20.3	23.364	245.48	17.87
24.615	1018.47	839.84	24.532	269.6	-40.77	24.532	233.88	6.27
25.783	966.04	787.41	25.7	183.71	-126.66	25.7	241.78	14.17
26.951	846.3	667.67	26.868	175.6	-134.77	26.868	252.51	24.9
28.119	558.9	380.27	28.037	178.83	-131.54	28.037	249.07	21.46
29.287	422.32	243.69	29.206	156.97	-153.4	29.206	246.88	19.27
30.455	279.16	100.53	30.373	171.12	-139.25	30.373	248.87	21.26
31.623	222.38	43.75	31.541	235.33	-75.04	31.541	256.12	28.51
32.791	230.82	52.19	32.709	312.54	2.17	32.709	249.9	22.29
33.96	200.18	21.55	33.877	478.78	168.41	33.877	250.06	22.45
35.127	193.96	15.33	35.045	634.85	324.48	35.045	268.96	41.35
36.296	166.49	-12.14	36.213	612.09	301.72	36.213	244.09	16.48
37.464	176.93	-1.7	37.382	515.7	205.33	37.382	230.09	2.48
38.63	167.42	-11.21	38.551	406.61	96.24	38.551	230.8	3.19
39.798	174.74	-3.89	39.718	276.91	-33.46	39.718	325.3	97.69
40.966	156.58	-22.05	40.886	211.15	-99.22	40.886	386.48	158.87
42.134	156.56	-22.07	42.054	170.54	-139.83	42.054	378.17	150.56
43.303	167.34	-11.29	43.222	162.15	-148.22	43.222	329.26	101.65
44.47	152.99	-25.64	44.39	380.2	69.83	44.39	270.58	42.97
45.639	168.71	-9.92	45.558	553.09	242.72	45.558	273.84	46.23
46.805	172.75	-5.88	46.727	516.43	206.06	46.727	263.46	35.85
47.973	159.38	-19.25	47.896	427.85	117.48	47.896	240.9	13.29
49.141	180.93	2.3	49.063	346.21	35.84	49.063	259.61	32
50.309	168.71	-9.92	50.231	276.48	-33.89	50.231	297.04	69.43
51.476	168.21	-10.42	51.399	240.3	-70.07	51.399	307.06	79.45
52.645	138.25	-40.38	52.567	303.75	-6.62	52.567	316.51	88.9
53.812	167.15	-11.48	53.735	443.54	133.17	53.735	339.17	111.56
54.98	153.32	-25.31	54.903	407.76	97.39	54.903	297.61	70
56.146	150.11	-28.52	56.071	314.19	3.82	56.071	328.39	100.78
57.314	171.1	-7.53	57.24	226.33	-84.04	57.24	275.16	47.55
58.482	152	-26.63	58.408	183.29	-127.08	58.408	305.52	77.91
59.65	174.48	-4.15	59.576	198.45	-111.92	59.576	312.29	84.68
60.819	149.7	-28.93	60.744	207.12	-103.25	60.744	284.57	56.96
61.988	154.18	-24.45	61.912	190.28	-120.09	61.912	265.61	38
63.155	176.78	-1.85	63.08	194.17	-116.2	63.08	271.12	43.51
64.323	171.23	-7.4	64.248	275.04	-35.33	64.248	274.19	46.58
65.491	178.12	-0.51	65.416	592.21	281.84	65.416	350.03	122.42
66.659	161.27	-17.36	66.585	650.25	339.88	66.585	326.16	98.55
67.827	161.23	-17.4	67.753	579.97	269.6	67.753	278.64	51.03
68.995	152.74	-25.89	68.921	470.78	160.41	68.921	252.14	24.53
70.163	170.29	-8.34	70.089	348.79	38.42	70.089	252.96	25.35
71.332	195.62	16.99	71.258	255	-55.37	71.258	251.77	24.16
72.499	191.45	12.82	72.425	177.67	-132.7	72.425	265.1	37.49
73.667	192.62	13.99	73.594	165.75	-144.62	73.594	261.65	34.04
74.835	190.68	12.05	74.763	200.53	-109.84	74.763	239.48	11.87
76.004	153.48	-25.15	75.931	210.44	-99.93	75.931	220.04	-7.57
77.172	153.56	-25.07	77.097	188.72	-121.65	77.097	229.87	2.26
78.34	153.77	-24.86	78.265	172.91	-137.46	78.265	263.64	36.03
79.509	167.88	-10.75	79.433	426.94	116.57	79.433	307.35	79.74
80.678	135.7	-42.93	80.6	609.34	298.97	80.6	279.25	51.64
81.846	164.71	-13.92	81.769	558.84	248.47	81.769	296.72	69.11
83.014	155.88	-22.75	82.937	438.17	127.8	82.937	270.07	42.46
84.182	143.07	-35.56	84.105	319.48	9.11	84.105	263.81	36.2
85.349	163.37	-15.26	85.273	235.4	-74.97	85.273	274.26	46.65
86.517	154.84	-23.79	86.441	190.22	-120.15	86.441	298.35	70.74
87.685	153.05	-25.58	87.609	159.25	-151.12	87.609	271.58	43.97
88.854	158.85	-19.78	88.777	161.78	-148.59	88.777	265.32	37.71
90.023	154.25	-24.38	89.944	182.04	-128.33	89.944	281.33	53.72
91.191	808.3	629.67	91.117	223.18	-87.19	91.117	265.59	37.98
92.361	1084.42	905.79	92.284	187.62	-122.75	92.284	291.91	64.3
93.527	1032.37	853.74	93.452	357.99	47.62	93.452	281.3	53.69
94.693	973.95	795.32	94.62	625	314.63	94.62	292.52	64.91
95.862	790.44	611.81	95.788	666.6	356.23	95.788	265.64	38.03
97.03	494.36	315.73	96.956	622.97	312.6	96.956	246.07	18.46
98.199	354.82	176.19	98.124	489.79	179.42	98.124	243.25	15.64
99.368	255.32	76.69	99.292	343.04	32.67	99.292	245.13	17.52
100.536	197.67	19.04	100.46	243.52	-66.85	100.46	235.36	7.75
101.704	193.21	14.58	101.631	196.76	-113.61	101.631	265.96	38.35
102.872	178.25	-0.38	102.799	187.44	-122.93	102.799	305.36	77.75
104.04	164.44	-14.19	103.971	168.18	-142.19	103.971	310.94	83.33
105.209	179.12	0.49	105.139	162.29	-148.08	105.139	317.74	90.13
106.376	151.59	-27.04	106.307	201.52	-108.85	106.307	292.42	64.81
107.544	172.95	-5.68	107.475	225.03	-85.34	107.475	335.45	107.84
108.712	162.81	-15.82	108.642	227.67	-82.7	108.642	277.1	49.49
109.88	165.25	-13.38	109.811	209.01	-101.36	109.811	271	43.39
111.048	169.45	-9.18	110.978	206.2	-104.17	110.978	256.9	29.29
112.216	184.3	5.67	112.147	214.83	-95.54	112.147	259.3	31.69
113.384	185.25	6.62	113.315	210.18	-100.19	113.315	285.41	57.8
114.553	183.82	5.19	114.485	178.11	-132.26	114.485	245.23	17.62
115.72	185.12	6.49	115.655	203.71	-106.66	115.655	254.78	27.17
116.888	216.03	37.4	116.825	241.57	-68.8	116.825	239.32	11.71
118.056	193.9	15.27	117.997	493.89	183.52	117.997	251.88	24.27
119.224	191.62	12.99	119.165	705.65	395.28	119.165	257.87	30.26
120.392	170.92	-7.71	120.332	682.01	371.64	120.332	268.26	40.65
121.56	175.78	-2.85	121.499	648.71	338.34	121.499	285.45	57.84
122.728	166.34	-12.29	122.667	515.66	205.29	122.667	278.74	51.13
123.897	152.45	-26.18	123.835	337.31	26.94	123.835	227.14	-0.47
125.064	163.08	-15.55	125.003	254.51	-55.86	125.003	228.58	0.97
126.232	182.95	4.32	126.171	185.16	-125.21	126.171	179.39	-48.22
127.4	185.85	7.22	127.339	168.94	-141.43	127.339	225.16	-2.45
128.568	196.33	17.7	128.508	169.08	-141.29	128.508	240.67	13.06
129.736	228.38	49.75	129.675	151.73	-158.64	129.675	229.55	1.94
130.904	205.95	27.32	130.84	148.22	-162.15	130.84	222.93	-4.68
132.072	191.14	12.51	132.009	190.71	-119.66	132.009	270.01	42.4
133.24	183.52	4.89	133.175	211.6	-98.77	133.175	250.75	23.14
134.407	155.16	-23.47	134.344	242.43	-67.94	134.344	253.2	25.59
135.576	157.73	-20.9	135.512	308.43	-1.94	135.512	288	60.39
136.744	155.7	-22.93	136.679	260.83	-49.54	136.679	344.36	116.75
137.912	303.56	124.93	137.848	248.71	-61.66	137.848	303.45	75.84
139.08	1102.01	923.38	139.014	254.83	-55.54	139.014	281.39	53.78
140.248	1062.37	883.74	140.182	271.57	-38.8	140.182	263.35	35.74
141.416	1041.99	863.36	141.35	487.57	177.2	141.35	259	31.39
142.584	968.3	789.67	142.518	643.42	333.05	142.518	239.87	12.26
143.752	742.14	563.51	143.686	628.12	317.75	143.686	220.93	-6.68
144.921	479.34	300.71	144.854	626.91	316.54	144.854	229.39	1.78
146.089	333.33	154.7	146.022	519.74	209.37	146.022	222.35	-5.26
147.257	219.96	41.33	147.191	339.69	29.32	147.191	226.13	-1.48
148.425	228.95	50.32	148.361	229.65	-80.72	148.361	198.58	-29.03
149.593	193.23	14.6	149.527	170.43	-139.94	149.527	211.55	-16.06
150.759	188.97	10.34	150.695	177.44	-132.93	150.695	226.97	-0.64
151.928	182.92	4.29	151.867	179.72	-130.65	151.867	208.97	-18.64
153.095	154.07	-24.56	153.035	155.89	-154.48	153.035	223.72	-3.89
154.262	179.36	0.73	154.205	155.24	-155.13	154.205	225.65	-1.96
155.43	176.99	-1.64	155.373	193.3	-117.07	155.373	233.26	5.65
156.598	183.84	5.21	156.542	262.76	-47.61	156.542	208.67	-18.94
157.766	206.58	27.95	157.711	279.45	-30.92	157.711	255.16	27.55
158.934	181.93	3.3	158.879	246.65	-63.72	158.879	214	-13.61
160.102	164.92	-13.71	160.047	225.37	-85	160.047	220.46	-7.15
161.27	968.37	789.74	161.214	210.26	-100.11	161.214	236.57	8.96
162.437	979.52	800.89	162.382	212.08	-98.29	162.382	277.39	49.78
163.605	1046.81	868.18	163.551	230.63	-79.74	163.551	284.43	56.82
164.773	1023.89	845.26	164.719	435.84	125.47	164.719	266.29	38.68
165.941	789.68	611.05	165.888	672.56	362.19	165.888	243.19	15.58
167.112	536.49	357.86	167.056	707.89	397.52	167.056	226.61	-1
168.278	351.51	172.88	168.224	621.78	311.41	168.224	224.01	-3.6
169.446	249.32	70.69	169.392	438.34	127.97	169.392	211.83	-15.78
170.615	209.38	30.75	170.56	310.42	0.05	170.56	248.46	20.85
171.783	180.45	1.82	171.728	232.31	-78.06	171.728	248.38	20.77
172.951	159.75	-18.88	172.896	207.25	-103.12	172.896	227.2	-0.41
174.119	171.68	-6.95	174.064	174.46	-135.91	174.064	260.23	32.62
175.286	181.73	3.1	175.232	168.73	-141.64	175.232	226.45	-1.16
176.455	204.73	26.1	176.398	147.92	-162.45	176.398	244.12	16.51
177.624	190.88	12.25	177.566	165.71	-144.66	177.566	224.81	-2.8
178.79	166.05	-12.58	178.734	207.31	-103.06	178.734	222.77	-4.84
179.958	165.58	-13.05	179.902	266.48	-43.89	179.902	237.91	10.3
181.126	171.47	-7.16	181.071	254.63	-55.74	181.071	242.61	15
182.294	163.53	-15.1	182.242	207.19	-103.18	182.242	233.62	6.01
183.462	177.23	-1.4	183.409	187.83	-122.54	183.409	231.41	3.8
184.63	168.67	-9.96	184.577	205.62	-104.75	184.577	221.67	-5.94
185.798	182.04	3.41	185.745	572.92	262.55	185.745	245.25	17.64
186.967	166.75	-11.88	186.913	678.02	367.65	186.913	280.91	53.3
188.136	172.63	-6	188.081	697.31	386.94	188.081	422.86	195.25
189.304	187.81	9.18	189.249	553.06	242.69	189.249	367.68	140.07
190.472	197.4	18.77	190.416	388.57	78.2	190.416	249.88	22.27
191.64	292.95	114.32	191.585	278.38	-31.99	191.585	247.75	20.14
192.808	247.27	68.64	192.752	203.9	-106.47	192.752	223.49	-4.12
193.976	263.74	85.11	193.92	174.83	-135.54	193.92	220.96	-6.65
195.144	211.4	32.77	195.088	165.35	-145.02	195.088	244.32	16.71
196.311	206.89	28.26	196.256	177.55	-132.82	196.256	270.09	42.48
197.477	187.36	8.73	197.424	178.7	-131.67	197.424	252.7	25.09
198.646	202.82	24.19	198.593	186.44	-123.93	198.593	215.01	-12.6
199.814	195.07	16.44	199.76	182.71	-127.66	199.76	212.77	-14.84
200.982	220.92	42.29	200.929	185.42	-124.95	200.929	230.71	3.1
202.15	186.49	7.86	202.098	176.15	-134.22	202.098	205.91	-21.7
203.318	170.52	-8.11	203.267	182.42	-127.95	203.267	210.33	-17.28
204.486	186.16	7.53	204.435	160.78	-149.59	204.435	195.68	-31.93
205.654	179.86	1.23	205.601	192.34	-118.03	205.601	221.2	-6.41
206.822	183.12	4.49	206.769	479.46	169.09	206.769	203.06	-24.55
207.992	181.32	2.69	207.937	676.4	366.03	207.937	219.43	-8.18
209.16	164.56	-14.07	209.105	648.37	338	209.105	224.57	-3.04
210.328	155.19	-23.44	210.274	636.33	325.96	210.274	232.67	5.06
211.496	211.44	32.81	211.441	476.67	166.3	211.441	234.88	7.27
212.664	1035.51	856.88	212.609	334.29	23.92	212.609	272.41	44.8
213.832	1032.11	853.48	213.777	237.97	-72.4	213.777	226.59	-1.02
214.999	1006.77	828.14	214.945	181.13	-129.24	214.945	211.67	-15.94
216.166	1028.11	849.48	216.117	162.27	-148.1	216.117	222.13	-5.48
217.334	787.15	608.52	217.285	152.3	-158.07	217.285	213.59	-14.02
218.502	608.93	430.3	218.453	147.15	-163.22	218.453	228.72	1.11
219.67	423.29	244.66	219.624	146.39	-163.98	219.624	222.04	-5.57
220.838	303.23	124.6	220.791	156.97	-153.4	220.791	228.55	0.94
222.006	236.34	57.71	221.959	179.89	-130.48	221.959	203.23	-24.38
223.174	221.07	42.44	223.127	172.85	-137.52	223.127	220.26	-7.35
224.341	183.89	5.26	224.295	198.67	-111.7	224.295	188.2	-39.41
225.51	167.78	-10.85	225.463	232.58	-77.79	225.463	194.35	-33.26
226.678	174.99	-3.64	226.631	244.99	-65.38	226.631	244.71	17.1
227.846	168.79	-9.84	227.799	221.08	-89.29	227.799	229.48	1.87
229.014	189.27	10.64	228.968	236.82	-73.55	228.968	236.81	9.2
230.182	149.78	-28.85	230.135	253.27	-57.1	230.135	274.3	46.69
231.35	193.25	14.62	231.303	239.81	-70.56	231.303	255.51	27.9
232.518	187.51	8.88	232.471	239.27	-71.1	232.471	255.23	27.62
233.685	174.14	-4.49	233.638	297	-13.37	233.638	249.25	21.64
234.854	177.16	-1.47	234.806	666.69	356.32	234.806	249.38	21.77
236.022	166.3	-12.33	235.974	771.39	461.02	235.974	244.03	16.42
237.19	174.32	-4.31	237.142	723.09	412.72	237.142	243.86	16.25
238.358	171.33	-7.3	238.31	582.21	271.84	238.31	255.72	28.11
239.526	203.99	25.36	239.478	396.52	86.15	239.478	272.3	44.69
240.694	184.05	5.42	240.646	296.82	-13.55	240.646	232.33	4.72
241.864	209.19	30.56	241.814	201.98	-108.39	241.814	218.06	-9.55
243.031	199.82	21.19	242.981	180.16	-130.21	242.981	213.55	-14.06
244.2	181.78	3.15	244.152	149.92	-160.45	244.152	207.59	-20.02
245.368	224.27	45.64	245.32	162.15	-148.22	245.32	211.57	-16.04
246.536	208.12	29.49	246.488	159.16	-151.21	246.488	192.97	-34.64
247.704	200.04	21.41	247.657	152.18	-158.19	247.657	177.42	-50.19
248.872	234.23	55.6	248.825	157.28	-153.09	248.825	199.48	-28.13
250.04	1075.58	896.95	249.993	176.38	-133.99	249.993	219.81	-7.8
251.208	1037.53	858.9	251.161	192.31	-118.06	251.161	205.45	-22.16
252.375	1018.1	839.47	252.328	219.46	-90.91	252.328	221.48	-6.13
253.542	953.27	774.64	253.496	525	214.63	253.496	210.91	-16.7
254.71	770.67	592.04	254.663	744.55	434.18	254.663	223.33	-4.28
255.878	572.41	393.78	255.831	668.92	358.55	255.831	236.17	8.56
257.049	397.97	219.34	256.999	574.83	264.46	256.999	238.09	10.48
258.218	322.63	144	258.167	391.39	81.02	258.167	233.35	5.74
259.386	255.11	76.48	259.335	300.42	-9.95	259.335	250.58	22.97
260.554	195.63	17	260.503	208.64	-101.73	260.503	207.33	-20.28
261.72	153.33	-25.3	261.67	170.67	-139.7	261.67	251.06	23.45
262.888	186.66	8.03	262.839	166.49	-143.88	262.839	248.84	21.23
264.056	193.16	14.53	264.006	155.99	-154.38	264.006	265.1	37.49
265.224	182.25	3.62	265.175	158.43	-151.94	265.175	249.16	21.55
266.392	204.4	25.77	266.344	148.46	-161.91	266.344	224.51	-3.1
267.561	170.74	-7.89	267.512	216.98	-93.39	267.512	183.33	-44.28
268.728	181.25	2.62	268.68	684.75	374.38	268.68	232.9	5.29
269.897	178.55	-0.08	269.848	727.85	417.48	269.848	206.03	-21.58
271.064	181.07	2.44	271.014	696.93	386.56	271.014	285.49	57.88
272.232	197.36	18.73	272.182	569.73	259.36	272.182	253.43	25.82
273.4	200.53	21.9	273.349	388.38	78.01	273.349	230.99	3.38
274.568	203.07	24.44	274.518	324.54	14.17	274.518	231.17	3.56
275.737	188.52	9.89	275.686	223.25	-87.12	275.686	239.28	11.67
276.906	226.36	47.73	276.854	180.84	-129.53	276.854	237.57	9.96
278.073	699.85	521.22	278.022	167.85	-142.52	278.022	206.87	-20.74
279.241	1055.62	876.99	279.19	171.69	-138.68	279.19	210.14	-17.47
280.407	944.51	765.88	280.358	158.62	-151.75	280.358	189.99	-37.62
281.575	1015.49	836.86	281.527	145.04	-165.33	281.527	168.32	-59.29
282.743	910.41	731.78	282.694	161.24	-149.13	282.694	199.87	-27.74
283.911	720.26	541.63	283.867	154.8	-155.57	283.867	220.68	-6.93
285.08	577.14	398.51	285.035	182.92	-127.45	285.035	213.71	-13.9
286.248	414.63	236	286.203	225.73	-84.64	286.203	239.43	11.82
287.414	313.56	134.93	287.373	218.82	-91.55	287.373	261.45	33.84
288.583	277.37	98.74	288.541	228.43	-81.94	288.541	302.07	74.46
289.751	262.29	83.66	289.707	461.15	150.78	289.707	267.57	39.96
290.919	242.77	64.14	290.876	660.53	350.16	290.876	251.2	23.59
292.087	209.51	30.88	292.043	726.22	415.85	292.043	213.54	-14.07
293.253	208.14	29.51	293.21	626.83	316.46	293.21	210.19	-17.42
294.421	269.26	90.63	294.378	502.02	191.65	294.378	233.54	5.93
295.59	304.45	125.82	295.546	361.2	50.83	295.546	211.99	-15.62
296.757	233.96	55.33	296.714	290.53	-19.84	296.714	238.99	11.38
297.926	218.37	39.74	297.882	218.71	-91.66	297.882	230.33	2.72
299.093	187.33	8.7	299.05	189.53	-120.84	299.05	196.38	-31.23
