# Supplementary material for: The gut contractile organoid for studying the gut motility regulated by coordinating signals between interstitial cells of Cajal and smooth muscles
Source: eLife. 2025 Aug 22;13:RP97860. doi: 10.7554/eLife.97860 (PMC12373395; doi:10.7554/eLife.97860)
Supplement: Figure 7—source data 1. [file elife-97860-fig7-data1.xlsx]

## Sheet: Fig7A-timelapse
Ctrl		Nife1uM		Nife washout
Time [s]	#1 (TD)	Time [s]	#1 (TD)	Time [s]	#1 (TD)
-0.001	279.14	-0.001	296.96	-0.001	241.85
1.242	278.67	1.243	297.18	1.241	242.22
2.41	278.83	2.412	297.3	2.409	242.81
3.579	278.53	3.58	297.43	3.577	241.46
4.747	278.74	4.747	297.69	4.743	241.95
5.915	278.73	5.915	298.22	5.912	242.65
7.083	278.69	7.083	298.06	7.08	242.2
8.252	278.49	8.251	298.42	8.249	242.24
9.421	278.99	9.417	298.7	9.418	242.42
10.589	278.69	10.583	298.6	10.586	241.98
11.758	278.87	11.752	298.49	11.754	242.24
12.926	279	12.918	298.41	12.922	242.25
14.094	311.61	14.087	298.88	14.089	242.22
15.262	305.34	15.255	299.08	15.257	241.91
16.43	282.58	16.423	299.39	16.423	242.06
17.597	279.3	17.591	299.26	17.592	241.87
18.763	278.76	18.759	299.58	18.76	242.42
19.933	278.83	19.925	299.68	19.928	242.38
21.101	278.8	21.093	300.07	21.096	241.66
22.269	278.63	22.262	299.62	22.264	241.19
23.437	278.86	23.43	299.86	23.433	241.22
24.605	283.63	24.598	300.4	24.601	241.46
25.773	314.5	25.766	299.86	25.769	241.47
26.941	286.34	26.934	300.61	26.938	241.88
28.109	279.8	28.102	299.96	28.107	241.47
29.278	279.34	29.269	300.21	29.275	241.69
30.446	278.62	30.439	299.77	30.443	241.88
31.614	279.23	31.608	300.24	31.611	241.99
32.782	279.24	32.777	300.36	32.778	241.68
33.95	279.2	33.945	300.15	33.947	241.6
35.119	301.91	35.111	300.47	35.115	242.42
36.288	305.68	36.279	300.2	36.284	242.44
37.455	282.64	37.447	300.31	37.452	272.55
38.624	279.47	38.613	299.99	38.62	264.22
39.79	278.98	39.782	300.25	39.788	245.72
40.957	278.93	40.951	300.14	40.956	245.46
42.125	279.05	42.118	300.37	42.122	245.27
43.293	278.55	43.286	300.24	43.291	244.78
44.461	278.64	44.452	300.3	44.459	245.2
45.628	279.15	45.62	299.89	45.627	244.82
46.797	278.98	46.788	300.26	46.795	244.25
47.966	278.57	47.956	300.05	47.963	244.43
49.133	278.84	49.125	300.31	49.131	243.79
50.301	278.75	50.294	299.73	50.299	243.34
51.471	278.77	51.462	300.11	51.467	243
52.639	310.63	52.63	300.02	52.636	243.46
53.807	300.11	53.8	300.13	53.805	242.89
54.973	281.61	54.968	300.06	54.973	242.52
56.142	278.98	56.138	299.74	56.141	242.02
57.31	278.64	57.306	300.08	57.307	241.55
58.478	278.42	58.475	300.26	58.475	242.37
59.646	278.67	59.644	299.99	59.641	240.67
60.814	278.82	60.812	300.1	60.809	241.63
61.982	278.89	61.98	299.51	61.978	241.74
63.152	278.91	63.146	299.86	63.145	241.21
64.32	278.74	64.314	300.42	64.315	241.63
65.486	278.91	65.482	300.43	65.482	241.16
66.655	278.79	66.65	300.23	66.651	240.98
67.823	278.96	67.818	300.09	67.819	241.03
68.991	278.88	68.984	300.49	68.987	241.15
70.159	279.06	70.15	300.05	70.155	240.58
71.327	279.06	71.32	299.86	71.323	239.95
72.495	279.12	72.486	299.97	72.489	240.71
73.663	279.13	73.654	300.04	73.658	240.34
74.83	279.49	74.822	300.09	74.826	258.29
76.001	279.63	75.99	299.94	75.994	267.8
77.169	279.63	77.158	299.51	77.162	244.41
78.337	279.64	78.326	299.86	78.33	242.07
79.506	307.37	79.494	300.08	79.496	242.66
80.673	310.95	80.662	299.79	80.665	241.61
81.841	284.79	81.828	299.48	81.834	241.87
83.008	280.32	82.996	299.4	83.002	241.66
84.177	279.21	84.164	300.17	84.17	241.23
85.345	279.34	85.332	299.7	85.338	240.76
86.511	279	86.501	299.93	86.506	240.15
87.677	279.51	87.669	299.96	87.674	240.51
88.845	279.28	88.837	299.84	88.842	240.57
90.013	279.23	90.005	299.83	90.011	240.33
91.181	279.69	91.173	299.84	91.177	240.49
92.349	279.66	92.341	299.83	92.345	240.3
93.517	279.48	93.51	299.58	93.513	240.33
94.685	279.7	94.678	299.6	94.681	239.92
95.853	279.6	95.846	299.45	95.849	239.5
97.021	279.4	97.012	299.74	97.017	239.55
98.191	279.43	98.18	299.94	98.185	239.45
99.36	279.63	99.348	299.85	99.354	239.46
100.53	279.56	100.514	299.65	100.521	239.28
101.697	280.18	101.683	299.91	101.689	239.26
102.866	280.43	102.849	299.7	102.857	238.88
104.034	280.03	104.018	299.84	104.025	238.77
105.202	279.84	105.186	299.97	105.193	238.88
106.37	280.16	106.354	299.99	106.361	238.66
107.538	280.54	107.522	299.81	107.529	238.92
108.704	280.07	108.69	299.6	108.698	239.15
109.872	280.42	109.858	300.11	109.866	238.76
111.04	280.59	111.026	299.74	111.034	238.94
112.208	280.36	112.195	299.73	112.202	238.58
113.376	280.37	113.364	299.9	113.37	238.94
114.544	280.33	114.533	300.03	114.539	238.82
115.712	280.36	115.701	299.06	115.709	238.66
116.882	281.01	116.869	299.41	116.877	238.79
118.051	280.69	118.037	299.72	118.047	238.31
119.22	280.56	119.205	299.6	119.215	238.25
120.389	280.79	120.374	299.32	120.383	238.61
121.557	280.96	121.543	299.79	121.551	238.66
122.725	280.93	122.712	299.8	122.719	239.06
123.891	280.83	123.88	299.8	123.887	238.67
125.059	281.29	125.048	299.6	125.057	238.78
126.229	298.87	126.216	299.91	126.226	238.72
127.395	316.15	127.384	299.62	127.395	238.87
128.564	287.68	128.55	299.62	128.561	238.38
129.73	282.02	129.718	299.42	129.729	239.15
130.896	280.48	130.887	299.82	130.897	238.57
132.064	280.52	132.054	299.97	132.065	238.9
133.232	280.41	133.222	299.51	133.234	238.58
134.4	280.71	134.39	299.56	134.403	238.91
135.569	280.52	135.558	299.46	135.569	239.24
136.735	280.52	136.726	299.54	136.737	239.2
137.904	280.39	137.894	299.79	137.903	238.73
139.073	280.31	139.063	299.52	139.069	239.41
140.241	280.63	140.232	299.6	140.237	238.96
141.409	280.47	141.401	299.7	141.403	239.23
142.577	280.52	142.569	298.87	142.572	238.92
143.745	317.33	143.736	299.12	143.741	239.65
144.913	304.8	144.905	299.26	144.907	238.49
146.08	283.86	146.073	299.69	146.075	239.46
147.249	280.81	147.241	299.14	147.243	239.11
148.418	280.12	148.409	299.23	148.411	239.57
149.586	280.23	149.578	299.28	149.579	239.71
150.754	280.06	150.747	299.57	150.747	239.38
151.922	280.21	151.915	298.94	151.915	239.55
153.09	280.46	153.083	299.13	153.084	239.43
154.258	280.25	154.251	299.48	154.253	239.49
155.425	280.49	155.421	299.29	155.421	239.15
156.595	280.64	156.589	299.04	156.589	239.04
157.761	280.57	157.759	299.24	157.757	239.24
158.927	280.4	158.928	299.07	158.925	239.45
160.096	280.41	160.096	299.28	160.093	238.96
161.264	280.36	161.264	299.01	161.261	238.68
162.432	280.54	162.432	299.44	162.428	239.36
163.6	280.63	163.6	299.02	163.597	239.83
164.769	281.09	164.769	299.08	164.765	240.39
165.938	281.05	165.937	299.46	165.933	239.8
167.106	281.22	167.105	298.93	167.099	239.95
168.274	280.75	168.273	298.94	168.269	239.83
169.442	298.04	169.442	299.28	169.437	239.45
170.609	316.97	170.61	298.69	170.605	239.76
171.777	288.11	171.78	298.5	171.774	239.55
172.945	282.31	172.948	298.31	172.941	239.87
174.113	280.6	174.116	298.85	174.109	239.4
175.282	280.42	175.283	298.49	175.275	240.34
176.45	280.38	176.451	298.7	176.443	239.71
177.618	280.75	177.619	298.65	177.611	239.85
178.786	280.69	178.787	298.4	178.78	239.71
179.955	280.57	179.955	298.53	179.949	239.97
181.124	280.85	181.123	298.34	181.116	239.98
182.292	316.05	182.289	298.15	182.284	239.88
183.46	289.15	183.458	298.53	183.452	240.14
184.628	281.55	184.625	298.44	184.62	239.77
185.796	280.47	185.794	298.29	185.788	240.22
186.964	280.43	186.962	298.63	186.956	240.49
188.132	280.26	188.13	298.73	188.124	239.69
189.298	280.29	189.298	298.08	189.292	239.44
190.467	280.14	190.466	298.1	190.458	239.63
191.636	280.12	191.632	298.28	191.626	240.07
192.803	279.93	192.8	298.17	192.794	240.37
193.971	279.85	193.967	298.43	193.962	239.86
195.139	279.93	195.136	298.22	195.13	239.5
196.307	280.27	196.304	298.57	196.299	240.16
197.475	280.16	197.472	298.19	197.467	239.74
198.641	280.4	198.64	298.44	198.636	239.47
199.81	280.48	199.808	298.45	199.803	239.68
200.979	280.65	200.976	297.9	200.971	239.94
202.146	280.41	202.144	298.67	202.139	239.32
203.314	280.6	203.31	298.58	203.307	239.65
204.482	280.51	204.479	297.94	204.476	239.86
205.65	280.89	205.645	298.25	205.645	239.73
206.82	280.97	206.813	298.21	206.813	239.29
207.989	319.17	207.981	298.27	207.981	239.31
209.158	292.79	209.149	298.71	209.15	239.09
210.326	282.68	210.317	298.67	210.318	240
211.493	280.61	211.486	298.43	211.486	239.15
212.661	280.33	212.655	298.53	212.654	239.53
213.829	280.23	213.824	298.52	213.822	239.5
214.998	280	214.992	299.13	214.991	239.74
216.168	280.08	216.16	298.88	216.16	239.95
217.336	280.13	217.328	298.55	217.33	239.65
218.505	280	218.496	298.62	218.498	239.86
219.673	280.19	219.664	298.36	219.666	239.61
220.84	280.46	220.832	298.05	220.834	239.67
222.008	280.7	222.001	298.27	222.002	239.94
223.176	280.4	223.169	298.37	223.17	240.03
224.344	280.2	224.337	298.26	224.339	239.9
225.512	306.19	225.506	298.33	225.505	239.72
226.68	306.54	226.676	298.17	226.673	239.94
227.849	283.83	227.844	298.32	227.841	239.63
229.018	280.84	229.013	298.11	229.009	240.13
230.187	280.13	230.182	298.06	230.177	240.01
231.355	280.41	231.351	297.57	231.345	239.61
232.523	279.99	232.519	297.55	232.513	240.64
233.691	280.31	233.687	297.77	233.682	240.66
234.859	280.29	234.852	298.02	234.849	240.82
236.025	280.58	236.021	298	236.017	239.91
237.193	280.5	237.189	298.02	237.185	240.16
238.362	280.33	238.357	298.1	238.353	240.11
239.53	280.78	239.526	298.28	239.521	239.79
240.698	280.31	240.694	298.49	240.689	240.45
241.866	280.2	241.862	297.97	241.857	240.09
243.034	280.45	243.03	298.22	243.025	240.06
244.202	280.32	244.198	298.35	244.194	240.07
245.368	280.55	245.367	298.35	245.363	239.98
246.537	281.02	246.535	298.22	246.531	239.53
247.705	280.83	247.703	298.43	247.697	240.46
248.873	280.86	248.871	298.33	248.865	240.4
250.041	313.86	250.039	298.07	250.033	239.73
251.209	308.42	251.207	298.74	251.199	239.15
252.375	284.76	252.375	298.46	252.368	239.91
253.543	281.08	253.543	298.28	253.534	239.85
254.711	280.11	254.712	298.06	254.703	239.93
255.879	279.95	255.878	298.63	255.869	240.66
257.048	280.44	257.046	298.04	257.037	240.22
258.216	280.59	258.214	298.07	258.205	239.76
259.384	280.44	259.382	298.15	259.373	240.18
260.552	280.34	260.55	297.62	260.541	240.5
261.718	280.44	261.718	297.98	261.709	240.56
262.886	280.63	262.886	298.25	262.876	240.06
264.054	280.8	264.054	298.29	264.044	240.24
265.223	280.63	265.22	298.53	265.212	239.69
266.391	316.59	266.389	297.87	266.38	240.6
267.559	301.91	267.557	298.44	267.548	240.83
268.727	283.61	268.723	298.13	268.714	240
269.895	281.04	269.891	298.04	269.882	240.55
271.064	280.65	271.061	298.54	271.051	240.43
272.233	280.28	272.229	298.2	272.22	240.28
273.401	280.07	273.398	297.92	273.388	240.57
274.568	279.9	274.567	298.2	274.556	240.63
275.737	281.08	275.736	298.05	275.723	240.51
276.905	314	276.905	298.03	276.892	240.63
278.073	287.41	278.073	297.42	278.06	240.58
279.241	281.73	279.241	297.77	279.228	240.29
280.407	280.68	280.411	298.66	280.396	240.37
281.576	279.93	281.579	298.21	281.562	240.63
282.743	280.13	282.747	297.83	282.73	240.99
283.912	279.97	283.913	297.88	283.898	240.55
285.08	280.02	285.082	297.82	285.066	240.19
286.248	279.91	286.251	297.76	286.235	240.41
287.416	279.67	287.42	297.77	287.401	240
288.584	298.34	288.588	297.67	288.569	264.27
289.753	312.85	289.756	297.71	289.737	268.52
290.922	286.33	290.922	298.17	290.905	245.48
292.089	281.75	292.09	298.21	292.073	243.46
293.258	280.69	293.256	297.95	293.241	243.58
294.426	280.11	294.422	297.85	294.409	242.98
295.594	279.74	295.591	297.8	295.577	242.46
296.762	279.63	296.758	297.81	296.746	242.66
297.93	280.07	297.926	297.91	297.915	241.68
299.098	279.78	299.094	298.21	299.083	241.24

## Sheet: Fig7B-timelapse
Ctrl							Nife1uM							Nife washout
Time [s]	#1 (EGFP)	#2 (EGFP)	Time [s]	#1 (EGFP)	#2 (EGFP)	#3 (EGFP)	Time [s]	#1 (EGFP)	#2 (EGFP)	Time [s]	#1 (EGFP)	#2 (EGFP)	#3 (EGFP)	Time [s]	#1 (EGFP)	#2 (EGFP)	Time [s]	#1 (EGFP)	#2 (EGFP)	#3 (EGFP)
0.065	13.84	15.34	0.065	108.56	42.55	21.57	0.064	16.97	16.29	0.066	16.48	28.59	15.43	0.066	17.73	19.05	0.065	36.46	52.86	55.65
1.239	14.22	14.95	1.242	56.51	38.29	22.52	1.242	16.67	16.95	1.243	16.71	28.63	14.95	1.244	16.94	20.02	1.241	35.23	54.52	31.93
2.405	14.57	15.04	2.41	35.41	36.82	22.8	2.408	16.75	16.76	2.412	16.24	28.93	15.09	2.41	17.84	20.43	2.409	35.59	56.94	22.37
3.574	14.7	15.4	3.579	28.31	38.74	23.7	3.576	17.18	16.57	3.58	15.84	30.36	15.12	3.578	18.43	19.99	3.577	34.51	56.01	17.4
4.743	14.11	15.02	4.747	24.3	37.49	22.12	4.744	16.72	16.83	4.747	16.09	28.86	15.29	4.746	17.54	19.3	4.743	33.83	55.25	13.77
5.91	14.17	14.89	5.915	22.12	37.16	22.71	5.913	17.15	16.56	5.915	16.19	29.27	16.36	5.914	17.26	19.31	5.912	34.35	59.34	13.8
7.078	14.19	14.69	7.083	21.28	37.56	20.86	7.08	17.9	17.08	7.083	16.72	30.49	16.16	7.082	16.79	20.39	7.08	34.97	55.88	11.77
8.246	13.95	15.06	8.252	20.74	38.12	22.35	8.248	16.55	16.88	8.251	16.39	28.93	14.8	8.25	17.22	43.52	8.249	35.65	56.37	12
9.415	13.82	15.47	9.421	21.96	44.9	21.43	9.416	17.57	16.7	9.417	16.25	28.83	15.58	9.416	19.13	40.19	9.418	37.83	57.83	10.38
10.585	13.57	15.23	10.589	20.97	38.76	21.73	10.584	17.72	16.58	10.583	15.89	29.29	14.81	10.586	49.17	46.65	10.586	36.11	56.09	11.19
11.755	13.65	14.86	11.758	20.86	38.16	20.89	11.752	17.1	16.19	11.752	16.36	29.99	15.94	11.754	35.17	33.37	11.754	35.1	54.97	11.21
12.926	14	15.22	12.926	22.55	38.94	20.59	12.92	17.32	16.41	12.918	16.02	28.92	15.56	12.921	25.72	25.34	12.922	34.21	54.86	12.3
14.095	14.2	14.66	14.094	23.72	118.31	56.92	14.092	16.97	17.07	14.087	15.84	29.62	15.24	14.089	21.37	21.75	14.089	33.91	54.33	14.29
15.263	14.57	14.28	15.262	23.21	91.45	95.02	15.263	17.79	16.68	15.255	16.23	29.4	15.77	15.257	18.95	20.38	15.257	35.16	54.62	12.53
16.433	14.52	15.77	16.43	23.85	63.75	63.66	16.435	17.83	16.97	16.423	16.27	29.96	15.85	16.425	17.59	18.8	16.423	35.2	54.53	11.6
17.601	14.16	15.36	17.597	23.5	48.79	38.01	17.603	18.64	16.95	17.591	16.23	28.76	15.85	17.593	17.09	18.56	17.592	35.8	54.29	10.48
18.772	13.99	15.32	18.763	23.96	41.42	28.92	18.771	17.22	17.21	18.759	16.12	29.47	16.17	18.761	16.84	19.46	18.76	35.06	60.67	10.71
19.944	13.89	15.15	19.933	23.48	38.6	25.76	19.94	17.23	16.96	19.925	16.4	28.42	15.31	19.931	15.81	18.07	19.928	36.11	60.19	10.79
21.114	14.51	14.99	21.101	25.03	38.44	23.74	21.106	17.63	16.56	21.093	16.05	29	15.05	21.099	16.29	18.33	21.096	38	57.95	10.04
22.284	14.63	15.57	22.269	24.21	37.03	22.77	22.274	16.62	16.65	22.262	16.76	28.58	14.93	22.269	17.2	19.13	22.264	37.7	56.31	10.96
23.452	14.33	14.29	23.437	24.47	37.77	22.06	23.44	16.86	15.98	23.43	16.99	29.82	15.35	23.437	17.25	19.31	23.433	36.24	56.27	11.14
24.622	14.79	15.55	24.605	24.24	74.62	22.54	24.61	17.42	16.43	24.598	16.47	29.22	16.19	24.605	16.87	19.05	24.601	36.26	57.47	12.16
25.792	13.81	14.87	25.773	24.43	101.46	21.53	25.779	17.88	16.65	25.766	16.04	30.32	15.38	25.772	17.01	20.08	25.769	34.85	55.51	13.3
26.963	15.07	14.76	26.941	23.68	69.11	23.12	26.947	17.21	16.64	26.934	16.45	30.27	16.11	26.942	17	19.19	26.938	35.38	57.84	17.07
28.134	14.52	15.09	28.109	22.68	49.32	22.82	28.115	17.21	16.05	28.102	16.37	29.93	16.28	28.109	17.5	18.13	28.107	34.35	56.53	84.25
29.303	14.64	15.82	29.278	21.69	39.81	22.49	29.281	16.16	17.18	29.269	16.64	29.98	15.94	29.277	17.69	19.63	29.275	34.95	54.12	52.9
30.475	14.33	14.36	30.446	22.26	37.09	21.53	30.448	16.37	16.81	30.439	16.62	30.1	15.49	30.445	17.23	19.81	30.443	34.66	53.06	30.34
31.645	15.4	15.37	31.614	23.81	37.03	21.03	31.616	16.71	16.62	31.608	16.68	29.11	15.68	31.611	16.81	18.7	31.611	35.45	54.75	20.2
32.814	13.49	14.19	32.782	23.98	42.12	21.77	32.784	17.96	16.72	32.777	15.92	28.52	15.25	32.779	17.25	18.7	32.778	35.33	54.52	17.19
33.984	14.27	14.89	33.95	28.24	38.37	20.87	33.952	16.51	17.44	33.945	16.36	29.7	15.98	33.947	17.52	19.25	33.947	35.35	54.43	13.97
35.152	14.33	15.09	35.119	179.03	108.32	20.73	35.12	16.74	16.31	35.111	15.98	29.67	15.66	35.115	16.75	20.08	35.115	35.53	52.82	12.37
36.32	17.21	14.74	36.288	130.91	93.23	20.86	36.288	16.77	17.25	36.279	16.43	29.42	15.72	36.283	16.82	19.66	36.284	33.57	53	11.36
37.493	25.96	15.31	37.455	164.19	63.42	22.35	37.456	16.96	16.92	37.447	16.82	29.41	15.51	37.452	16.52	19.85	37.452	34.82	134.76	11.17
38.661	20.46	14.89	38.624	86.43	46.9	21.17	38.624	17.51	16.39	38.613	15.88	28.66	15.76	38.621	17.08	19.33	38.62	42.99	110.48	11.03
39.832	17.37	15.32	39.79	47.92	40.94	20.54	39.792	16.56	17.15	39.782	15.99	28.69	16.21	39.787	17.05	20.86	39.788	135.49	80.95	10.85
41	15.64	15.01	40.957	35.06	36.36	20.94	40.961	16.36	17.04	40.951	16.95	29.35	15.64	40.955	17.09	21.43	40.956	89.98	64.2	10.89
42.168	14.52	15.09	42.125	29.5	35.96	20.14	42.129	16.01	16.83	42.118	16.27	28.56	15.85	42.123	17.68	21.51	42.122	56.38	57.25	10.49
43.338	13.59	15.31	43.293	26.11	35.69	21.56	43.298	16.72	16.94	43.286	15.8	28.35	16.35	43.289	17.82	20.34	43.291	43.52	53.6	11.34
44.506	13.97	15.32	44.461	24.43	35.91	22.77	44.466	17	16.7	44.452	16.51	28.68	16.17	44.458	17.76	21.07	44.459	37.24	51.1	11.48
45.674	14.08	15.78	45.628	23.28	35.16	23.41	45.634	16.11	17.58	45.62	15.8	29.07	15	45.626	17.18	19.25	45.627	34.02	51.2	12.01
46.845	13.54	14.52	46.797	22.33	33.76	22.04	46.802	16.82	16.83	46.788	15.93	28.7	16.04	46.795	17.08	19.9	46.795	33.68	52.53	11.32
48.016	14.58	15.42	47.966	22.46	35.06	21.84	47.97	16.58	16.64	47.956	15.61	28.48	16.16	47.964	16.67	19.37	47.963	32.28	51.23	10.93
49.184	14.55	14.12	49.133	21.48	38.79	22.5	49.138	17.03	17.41	49.125	16.22	29.87	15.34	49.132	17.42	19.65	49.131	32.09	49.21	10.61
50.354	13.85	14.94	50.301	21.7	35.82	22	50.307	16.72	16.95	50.294	16.92	29	15.98	50.3	17.07	19.8	50.299	32.04	49.31	11.92
51.522	14.6	15.21	51.471	19.81	39.6	21.62	51.473	16.74	16.74	51.462	16.61	29.23	15.74	51.468	17.65	19.84	51.467	31.94	50.21	12.24
52.692	14.08	15.54	52.639	20.56	116.04	22.34	52.641	15.88	18.39	52.63	16.36	30.64	16.32	52.636	17.42	20.12	52.636	33.22	49.61	11.92
53.864	14.29	14.21	53.807	20.05	82.92	25.24	53.809	17.34	17.42	53.8	16.44	29.72	15.36	53.804	17.35	19.14	53.805	34.21	49.35	12.2
55.034	13.84	15.29	54.973	20.43	58.58	23.95	54.977	16.34	17.7	54.968	15.53	30.03	15.23	54.973	17.68	20.23	54.973	32.97	47.12	11.97
56.202	13.79	14.35	56.142	20.35	44.85	21.85	56.145	15.85	17.31	56.138	16.02	30.78	15.39	56.141	16.78	18.53	56.141	32.07	48.89	13.31
57.371	14.15	14.83	57.31	19.97	41.2	21.97	57.313	16.2	16.82	57.306	15.84	29.61	15.65	57.31	18.25	19.65	57.307	32.14	49.49	11.51
58.542	14.25	14.91	58.478	20.38	38.01	22.08	58.481	17.39	17.2	58.475	15.95	30.36	15.59	58.477	17.2	20.32	58.475	34.24	54.18	12.45
59.713	14.24	15.17	59.646	19.53	38.09	22.11	59.649	17.04	16.74	59.644	15.79	28.76	15.9	59.645	18.12	39.65	59.641	35.63	50.77	12.21
60.883	14.55	14.81	60.814	19.95	36.46	21.6	60.815	16.77	16.05	60.812	16.34	29.43	15.84	60.813	17.9	37.52	60.809	35.36	49.73	13.69
62.051	21.82	15.02	61.982	19.77	38.48	21.23	61.984	16.9	17.39	61.98	16.31	30.11	15.36	61.981	17.99	29.14	61.978	35.24	48.77	13.21
63.221	23.7	14.51	63.152	20.25	37.13	21.26	63.152	16.17	16.69	63.146	16.53	29.96	15.23	63.149	17.53	24.86	63.145	35.17	49.65	12.83
64.389	18.78	15.19	64.32	19.05	36.18	21.46	64.32	17.2	16.96	64.314	16.35	29.52	15.96	64.317	18.42	20.99	64.315	34.3	55.34	12.38
65.561	16.02	14.84	65.486	19.98	36.81	21.37	65.49	16.89	16.92	65.482	16.61	30.56	15.71	65.485	17.13	19.11	65.482	33.31	54.42	12.22
66.729	14.77	15.32	66.655	19.64	38.37	23.17	66.658	17.9	16.99	66.65	16.82	29.89	15.65	66.653	16.88	18.51	66.651	33.82	53.01	11.93
67.9	13.97	23.14	67.823	19.78	40.42	99.27	67.824	17.22	16.9	67.818	17.03	29.01	14.99	67.822	17.09	18.31	67.819	33.84	49.8	12.39
69.072	14	23.43	68.991	19.82	39.26	81.92	68.993	17.31	17.21	68.984	17.69	30.12	15.71	68.988	18.34	18.74	68.987	34.57	52.21	13.35
70.242	13.89	17.89	70.159	19.5	38.23	51.57	70.16	17.16	16.44	70.15	16.87	29.9	16.19	70.156	17.67	18.84	70.155	35.81	52.41	13.51
71.41	13.55	16.42	71.327	19.93	39.12	33.76	71.329	17.52	16.16	71.32	16.69	30.66	16	71.324	17.22	19.81	71.323	35.66	55.51	15.18
72.58	13.48	15.4	72.495	20.16	38.98	27.28	72.497	16.92	16.45	72.486	16.73	31.43	16.43	72.492	17.49	19.69	72.489	35.51	52.96	15.58
73.75	13.82	14.87	73.663	19.78	39.8	24.64	73.663	18	16.42	73.654	16.24	31.91	16.37	73.66	17.42	17.95	73.658	35.68	51.09	14.54
74.918	13.28	15.07	74.83	20.2	42.28	24.19	74.831	17.16	16.72	74.822	16	29.25	16.36	74.826	17.77	19.31	74.826	35.54	123.08	12.94
76.089	13.87	15.81	76.001	19.87	38.94	23.22	75.999	18.13	16.74	75.99	16.05	30.18	15.71	75.995	17.51	19.47	75.994	42.1	123	12.86
77.26	13.88	14.3	77.169	20.24	39.69	21.96	77.165	17.59	16.65	77.158	16.86	30.51	15.28	77.163	18.4	21.75	77.162	140.15	90.28	12.95
78.431	13.81	14.59	78.337	19.34	40.15	21.91	78.334	17.28	16.92	78.326	16.12	29.73	15.31	78.329	18.53	19.71	78.33	97.4	71.55	13.63
79.603	13.62	15	79.506	19.38	112.77	22.17	79.503	17.51	17.44	79.494	16.2	30	15.25	79.497	17.47	20.13	79.496	62.39	59.4	14.11
80.773	13.72	14.18	80.673	21.3	97.52	23.09	80.671	16.84	17.17	80.662	15.67	29.41	15.03	80.663	17.72	19.32	80.665	45.46	52.98	14.22
81.943	14.11	14.75	81.841	177.31	69.8	21.7	81.84	16.59	17.04	81.828	16.43	29.63	15.28	81.831	18.21	18.93	81.834	37.31	52.79	14.66
83.113	14.02	14.26	83.008	123.02	49.36	22.16	83.008	16.77	17.5	82.996	15.78	29	16.06	82.997	17.81	18.78	83.002	34.68	50.8	13.59
84.281	14.09	14.33	84.177	70.32	42.36	21.45	84.175	17.09	16.85	84.164	15.47	29.77	15.94	84.164	18.12	19.05	84.17	33.49	50.45	13.33
85.452	14.24	15.12	85.345	39.04	39.08	20.67	85.344	18.59	16.21	85.332	16.56	30.94	15.01	85.333	17.68	21.44	85.338	32.73	48.46	12.94
86.625	24.94	15.29	86.511	29.62	39.15	21.64	86.512	16.7	17.04	86.501	15.82	30.51	15.38	86.501	17.45	20.91	86.506	32.43	46.74	13.08
87.793	21.16	14.96	87.677	24.35	39.24	22.09	87.682	16.96	17.1	87.669	16.31	31.03	14.94	87.669	18.62	20.98	87.674	32.06	50.69	13.32
88.961	18.02	14.7	88.845	22.93	38.84	21.64	88.851	16.95	17.26	88.837	16.61	30.58	15.21	88.838	18.41	20.13	88.842	33.22	48.88	13.81
90.131	16.64	22.11	90.013	21.38	39.5	21.32	90.019	16.87	15.87	90.005	16.37	30.62	15.4	90.007	18.08	18.48	90.011	34.4	48.18	14.81
91.297	13.89	23.96	91.181	21.44	39.48	21.56	91.187	17.05	16.89	91.173	16.36	30.26	15.2	91.175	17.28	19.27	91.177	42.45	51.59	13.74
92.467	14.02	18.87	92.349	20.66	41.4	22.31	92.354	16.11	16.89	92.341	16.7	30.68	15.79	92.343	17.96	19.22	92.345	135.45	57.02	14.56
93.637	14.62	25.89	93.517	21.36	39.66	22.21	93.522	16.61	17.2	93.51	17.41	29.86	15.68	93.509	17.83	21.51	93.513	90.54	54.07	14.66
94.807	14.59	22.71	94.685	22.97	40.55	22.27	94.688	17.04	16.86	94.678	17.4	30.17	15.64	94.678	18.79	44.41	94.681	58.09	52.16	14.44
95.978	14.41	17.48	95.853	23.18	40.57	22.93	95.856	16.7	17.2	95.846	16.7	31.24	15.33	95.846	18.42	34.84	95.849	43.66	51.92	14.37
97.146	14.5	16.41	97.021	22.69	41.57	22.16	97.025	16.87	17.4	97.012	16.29	30.23	16.16	97.011	18.3	26.09	97.017	36.84	50.91	13.96
98.314	14.22	16	98.191	22.84	42.4	21.48	98.194	17.25	16.16	98.18	16.36	30.19	15.98	98.181	17.25	22.6	98.185	34.08	50.37	12.95
99.484	14.08	15.7	99.36	25.07	44.33	20.92	99.362	16.92	17.12	99.348	17.14	30.47	15.91	99.349	18.03	19.89	99.354	33.45	49.74	13.95
100.652	14.04	16.25	100.53	25.88	42.31	21.71	100.531	17.54	16.22	100.514	15.93	30.15	16.28	100.517	17.04	18.85	100.521	33.25	49.59	13.88
101.822	23.04	25.18	101.697	26.6	37.88	21.37	101.7	17.76	15.93	101.683	15.93	30.36	14.73	101.685	17.71	18.99	101.689	31.42	50.39	15.24
102.99	21.05	18.81	102.866	25.27	38.43	20.55	102.868	17.36	16.35	102.849	16.54	29.52	14.44	102.854	17.34	19	102.857	32.8	49.21	14.75
104.158	18.36	15.65	104.034	23.7	37.57	20.41	104.036	17.38	16.35	104.018	17.07	28.69	15.13	104.022	17.46	18.28	104.025	32.51	49.78	15.95
105.329	15.75	15.73	105.202	22.6	40.17	21.14	105.204	17.37	16.92	105.186	16.63	28.28	15.76	105.19	17.66	19.74	105.193	33.68	52.16	16.4
106.497	14.63	15.24	106.37	22.44	38.58	21.51	106.373	16.35	16	106.354	16.4	29.27	15.47	106.358	17.71	19.43	106.361	33.34	55.12	14.56
107.667	14.6	15.06	107.538	23.19	40.5	20.61	107.541	16.97	16.73	107.522	17.5	28.5	15.67	107.526	17.34	18.53	107.529	34.1	54	14.53
108.837	13.76	14.5	108.704	22.92	39.82	21.71	108.709	16.87	16.86	108.69	16.59	29.6	15.69	108.694	16.83	21.76	108.698	33.93	53.08	14.12
110.007	14.46	14.47	109.872	23.11	41.04	21.73	109.877	16.33	17.37	109.858	16.65	29.48	15.52	109.862	17.5	19.64	109.866	33.03	53.47	13.74
111.178	13.76	14.83	111.04	23.06	41.53	24.1	111.045	16.36	16.63	111.026	16.66	29.9	16.03	111.032	18.12	18.36	111.034	33.26	54.75	13.56
112.348	14.25	14.91	112.208	24.05	38.37	103.58	112.214	16.5	16.8	112.195	16.63	29.73	15.9	112.2	18.4	18.64	112.202	31.95	50.93	13.8
113.516	13.47	15.1	113.376	23.87	41.31	79.33	113.382	16.49	16.54	113.364	16.87	30.79	15.81	113.368	17.82	19.62	113.37	34.06	53.72	18.77
114.684	13.76	15.15	114.544	24.29	38.8	52.72	114.548	16	16.77	114.533	16.69	29.3	16.91	114.534	16.99	20.41	114.539	34.49	55.25	19.77
115.852	14.02	14.7	115.712	25	40.92	34.46	115.717	15.91	17.02	115.701	16.52	30.56	15.77	115.7	18.49	43.14	115.709	33.87	54.16	15.18
117.02	13.66	22.75	116.882	25.18	46.13	29	116.883	16.74	16.66	116.869	16.7	28.97	15.66	116.868	18.73	37.07	116.877	36.89	52.13	15.05
118.188	13.4	23.16	118.051	24.71	43.25	26.11	118.051	16.6	16.29	118.037	16.14	30.85	15.23	118.037	19.2	26.19	118.047	37.82	54.47	14.59
119.358	13.8	16.71	119.22	25.27	40.85	23.94	119.219	16.88	16.18	119.205	16.79	30.18	16.14	119.206	18.7	22.63	119.215	39.15	53.77	13.83
120.527	13.67	16.46	120.389	23.51	42.39	23.18	120.387	17.64	17.25	120.374	16.22	29.23	15.62	120.374	18.53	19.39	120.383	36.13	54.87	13.54
121.697	14.12	16.1	121.557	24.91	40.55	22.21	121.555	16.69	17.18	121.543	16.55	28.17	15.56	121.543	17.49	19.07	121.551	34.85	55.62	14.16
122.867	13.74	14.56	122.725	24.49	41.8	21.75	122.722	17.6	16.62	122.712	16.3	31.01	15.61	122.711	17.71	17.64	122.719	34.04	56.8	14.27
124.035	19.48	15.17	123.891	23.74	39.73	21.32	123.891	17.23	17.26	123.88	16.38	30.26	15.43	123.879	17.58	18.29	123.887	33.82	55.69	14.27
125.205	22.73	14.41	125.059	21.43	40.01	20.81	125.061	17.08	15.99	125.048	16.53	29.8	15.15	125.047	17.6	18.69	125.057	34.42	54.63	16.61
126.375	19.09	14.92	126.229	22.45	101.75	96.59	126.229	16.99	16.27	126.216	16.96	30.4	15.44	126.215	18.15	17.73	126.226	35.05	54.12	17.2
127.546	16.05	14.31	127.395	25.79	99.04	70.76	127.397	17.22	16.84	127.384	16.57	29.34	16.47	127.381	18.35	18.94	127.395	35.62	55.5	15.58
128.716	15.12	14.66	128.564	25.33	69.34	41.47	128.565	15.72	16.71	128.55	16.61	28.34	16.86	128.55	17.73	20.5	128.561	36.75	56.84	15.04
129.889	14.17	14.69	129.73	24.27	49.36	29.41	129.733	16.82	16.67	129.718	16.53	28.77	15.93	129.719	17.9	20.32	129.729	35.55	57.61	15.06
131.057	14.32	14.81	130.896	23.63	41.38	24.36	130.901	16.91	16.83	130.887	17.21	29.84	16.08	130.888	16.98	19.24	130.897	36.16	55.91	14.17
132.225	14.65	13.75	132.064	23.21	37.92	21.65	132.068	17.13	16.32	132.054	17.42	29.54	15.82	132.056	17.57	20.32	132.065	38.74	55.9	13.81
133.397	14.04	14.24	133.232	22.68	38.03	20.85	133.236	17.58	17.43	133.222	16.87	30.95	15.77	133.222	17.08	19.28	133.234	37.08	58.64	14.42
134.565	14.28	14.18	134.4	23.37	39.46	20.58	134.405	17.91	17.6	134.39	17.5	30.68	15.97	134.39	17.58	19.2	134.403	35.56	56.41	14.46
135.733	13.5	14.77	135.569	23.54	36.49	19.72	135.573	18.26	17.23	135.558	17.56	30.48	16.49	135.558	18.18	20.4	135.569	35.83	55.64	16.06
136.903	13.91	25.09	136.735	22.67	35.21	19.66	136.741	17.57	16.36	136.726	17.06	31.19	16.35	136.724	19	19.94	136.737	34.76	54.07	14.6
138.071	24.18	20.43	137.904	22.88	34.67	19.84	137.909	17.63	16.95	137.894	16.84	29.76	15.8	137.893	18.86	19.22	137.903	35.19	55	14.72
139.239	20.31	16.44	139.073	23.19	37.63	19.74	139.075	17.31	16.63	139.063	17.09	29.17	16.14	139.062	18.06	19.41	139.069	35.18	54.27	14.82
140.412	17.41	15.87	140.241	23.65	39.4	20.22	140.243	16.83	17.25	140.232	17.01	29.73	16.09	140.231	17.95	20.15	140.237	36.2	56.97	13.92
141.583	15.59	14.76	141.409	24.02	37.14	20.95	141.411	16.87	16.67	141.401	17.86	30.58	16.25	141.399	18.3	20.94	141.403	36.71	57.33	14.42
142.751	14.96	14.11	142.577	124.77	36.8	20.71	142.578	17.32	16.75	142.569	17.21	30.61	16.18	142.565	17.89	43.05	142.572	40.3	57.04	15.24
143.919	13.95	15.35	143.745	160.64	119.01	20.66	143.746	16.5	16.65	143.736	17.17	28.54	15.64	143.734	17.45	35.33	143.741	38.65	56.27	37.38
145.087	13.78	15.26	144.913	180.99	84.67	19.78	144.915	17.21	16.54	144.905	16.76	29.14	16.29	144.902	18.14	27.37	144.907	37.64	57.88	84.8
146.255	13.8	14.32	146.08	130.02	60.53	20.14	146.083	17.03	16.36	146.073	16.75	29.85	15.84	146.069	18.41	23.58	146.075	36.33	59.17	51.75
147.423	13.93	14.81	147.249	65.77	45.72	21.27	147.251	17.56	16.4	147.241	16.63	30.22	15.6	147.237	17.7	21.22	147.243	36.88	58.17	30.89
148.591	13.6	15.33	148.418	39.06	40.53	20.8	148.419	15.92	16.81	148.409	16.31	29.87	15.26	148.406	18.05	20.4	148.411	35.67	56.29	21.97
149.762	13.99	15.08	149.586	28.72	39.54	20.01	149.587	17.05	16.64	149.578	16.51	32.22	15.71	149.574	17.82	19.24	149.579	36.42	56.87	17.81
150.931	14.2	14.6	150.754	25.62	37.88	19.42	150.756	16.67	17.09	150.747	16.45	29.98	16.26	150.742	17.6	19.08	150.747	36.2	56.88	16.81
152.101	13.9	14.12	151.922	22.34	36.08	20.51	151.925	17.94	17.15	151.915	17.28	29.93	16.06	151.91	17.37	17.97	151.915	36.59	56.58	14.73
153.269	13.94	14.5	153.09	20.6	36.76	21.39	153.093	16.98	16.89	153.083	17.11	31.13	16.35	153.078	18.02	18.76	153.084	36.39	57.87	13.52
154.439	13.7	14.99	154.258	20.64	38.53	21.45	154.261	16.29	17.32	154.251	16.17	30.63	16.36	154.246	18.28	19.71	154.253	35.85	55.24	13.28
155.607	14.11	14.96	155.425	20.58	36.2	21.24	155.431	16.76	16.75	155.421	16.77	29.54	15.86	155.414	17.36	19.33	155.421	37.67	56.65	12.28
156.777	14.34	14.66	156.595	20.43	37.28	22.41	156.599	16.63	16.51	156.589	16.25	29.04	16.22	156.582	18.48	19.78	156.589	37.15	58.3	12.95
157.945	13.96	14.33	157.761	20.12	36.73	20.24	157.765	16.94	16.8	157.759	16.89	28.63	15.27	157.749	18.47	21.08	157.757	36.01	54.87	14.16
159.118	13.99	14.82	158.927	20.95	41.52	21.29	158.934	16.94	16.33	158.928	17.08	29.83	16.65	158.917	18.71	20.52	158.925	35.56	56.61	14.23
160.29	13.68	14.27	160.096	21.56	42.13	20.77	160.103	17.27	16.44	160.096	17.09	30.14	16.1	160.085	17.96	19.51	160.093	38.94	56.23	14.58
161.458	14.26	14.95	161.264	22.52	38.83	20.61	161.271	18.31	16.78	161.264	15.91	29.83	17.37	161.253	18.03	20.3	161.261	39.71	56.92	17.3
162.626	13.87	14.58	162.432	23.27	38.93	20.89	162.439	18.14	16.17	162.432	16.91	27.92	15.73	162.421	18.08	18.51	162.428	38.59	54.97	14.06
163.796	14.06	14.33	163.6	24.28	41.56	20.25	163.605	16.82	16.54	163.6	16.34	28.02	15.85	163.589	18.59	19.12	163.597	38	55.12	12.72
164.964	12.97	14.04	164.769	25.84	47.14	20.72	164.773	16.6	16.9	164.769	16.99	28.64	16.24	164.757	17.42	19.33	164.765	39.12	56.45	12.35
166.132	13.34	14.25	165.938	24.98	42.62	25.51	165.941	17.86	17.5	165.937	17.11	29.68	16.75	165.926	17.8	26.38	165.933	37.62	56.6	11.31
167.3	14.26	14.69	167.106	24.46	41.57	104.29	167.107	15.95	16.86	167.105	16.53	28.25	15.52	167.095	18.28	42.08	167.099	36.7	55.38	11.82
168.471	13.84	14.58	168.274	24.96	39.55	71.82	168.275	17.61	16.47	168.273	17.13	28.79	16.35	168.263	18.32	31.64	168.269	35.4	56.25	13
169.641	18.6	13.95	169.442	23.29	101.07	46.22	169.444	17.15	17.71	169.442	17.19	28.64	16.92	169.431	18.2	24.89	169.437	35.13	55.07	12.86
170.809	24.2	14.64	170.609	23.29	103.33	29.91	170.61	16.94	16.14	170.61	16.84	27.79	16.08	170.597	17.42	21.27	170.605	34.83	56.18	13.48
171.981	18.98	14.91	171.777	21.66	68.79	24.92	171.778	16.79	15.95	171.78	16.56	28.82	15.63	171.765	17.51	20.33	171.774	35.19	58.84	13.49
173.153	16.01	14.97	172.945	22.38	46.95	23.78	172.946	17.01	16.57	172.948	17.32	29.03	16.52	172.933	17.8	20.25	172.941	37.88	55.38	13.14
174.325	14.88	14.76	174.113	20.68	36.66	21.08	174.114	17.44	16.57	174.116	16.8	28.96	16.05	174.102	18.17	18.76	174.109	36.74	54.91	13.88
175.497	13.84	15.25	175.282	21.08	33.95	20.91	175.282	17.11	15.77	175.283	17.08	30.77	16.17	175.27	18.24	19.17	175.275	37.88	56.16	14.04
176.669	13.63	14.89	176.45	21.49	34.08	20.37	176.448	16.65	16.15	176.451	17.14	30.26	15.93	176.438	17.04	19.58	176.443	35.6	56.19	14.13
177.838	13.24	14.67	177.618	22.11	35.58	20.06	177.616	16.71	16.16	177.619	16.58	29.62	15.88	177.606	18.58	44.09	177.611	36.67	55.35	13.61
179.01	13.99	14.62	178.786	22.91	38.08	20.59	178.782	16.73	17.01	178.787	16.09	30.58	15.26	178.775	18.51	36.15	178.78	37.29	54.73	13.69
180.182	13.52	14.79	179.955	24.29	36.5	20.78	179.95	16.36	16.78	179.955	17.28	28.51	16.01	179.943	18.56	27.45	179.949	37.3	55.83	13.28
181.35	14.04	14.97	181.124	24.93	43.61	18.27	181.118	16.42	17.1	181.123	15.72	29.55	16.41	181.109	19.5	21.67	181.116	36.37	55.59	13.59
182.518	13.17	15.41	182.292	25.77	103.88	20.18	182.286	16.86	17.27	182.289	15.5	29.16	15.97	182.277	18.01	20.2	182.284	36.18	57.65	12.78
183.686	13.85	14.91	183.46	27.09	68.78	20.53	183.454	16.95	16.31	183.458	15.82	30.15	15.84	183.445	18.28	19.28	183.452	36.97	55.99	12.83
184.856	14.06	14.5	184.628	26.62	46.85	21.16	184.62	16.71	16.38	184.625	16.69	29.58	15.45	184.614	17.66	19.1	184.62	36.04	55.86	15.11
186.024	13.79	14.34	185.796	23.15	39.58	20.11	185.786	17.16	17.57	185.794	16.86	30.26	16.29	185.782	18.54	19.21	185.788	36.11	56.15	14.26
187.193	13.53	14.8	186.964	23.11	35.53	19.32	186.954	17.11	16.8	186.962	16.47	31.2	15.66	186.95	17.98	18.96	186.956	38.39	55.82	15.63
188.361	14.04	14.29	188.132	22.93	34.74	18.77	188.123	16.91	17.17	188.13	16.31	28.07	15.37	188.12	18.4	18.56	188.124	36.74	55.83	13.74
189.529	14.41	14.42	189.298	22.41	35.54	19.77	189.291	17.11	16.42	189.298	16.92	29.17	15.22	189.288	18.32	19.12	189.292	35.63	55.01	15.66
190.697	14.38	15.1	190.467	21.93	35.82	23.54	190.459	16.45	16.57	190.466	15.89	28.52	15.47	190.454	18.2	20.01	190.458	36.22	54.86	15.78
191.869	13.87	14.43	191.636	21.56	35.86	23.18	191.627	17.13	16.34	191.632	16.83	28.22	15.45	191.624	18.44	19.71	191.626	35.26	56.8	14.33
193.04	23.75	14.06	192.803	23.7	38.78	21.83	192.796	17.25	16.75	192.8	16.75	28.67	15.31	192.792	18.65	20	192.794	34.88	56.1	13.63
194.21	21.18	14.36	193.971	23.41	37.59	20.29	193.964	16.77	16.82	193.967	16.18	28.24	15.9	193.961	18.08	20.07	193.962	35.38	56.92	14.25
195.381	17.1	14.93	195.139	24.2	38.1	19.44	195.132	16.78	16.32	195.136	16.61	29.38	15.58	195.129	18.22	21.19	195.13	35.6	57.17	13.47
196.551	15.99	14.86	196.307	23.67	36.57	20.02	196.301	16.02	16.3	196.304	16.64	28.98	15.01	196.297	19.18	44.8	196.299	36.07	56.71	13.12
197.717	14.09	13.59	197.475	24.24	37.29	18.73	197.47	16.66	16.8	197.472	16.41	28.21	16.13	197.467	19.3	35.74	197.467	35.4	55.62	14.32
198.889	14.31	15.26	198.641	24.37	38.08	18.73	198.636	17.04	16.64	198.64	16.53	30.56	16.5	198.636	19.07	27.23	198.636	36.62	55.09	14.13
200.061	14.29	24.19	199.81	22.75	41.32	20.28	199.804	16.49	15.45	199.808	17.17	30.07	16.41	199.803	19.23	22.57	199.803	37.12	56.96	15.65
201.231	13.94	23.5	200.979	22.99	39.17	19.93	200.973	16.33	16.07	200.976	16.52	29.69	15.48	200.971	17.14	20.79	200.971	36.75	56.13	16.27
202.402	14.01	17.94	202.146	22.45	36.41	20.55	202.141	16.89	16.49	202.144	16.26	29.24	15.45	202.14	17.78	19.91	202.139	38.02	55.4	16.93
203.573	13.4	15.77	203.314	22.55	36.96	20.12	203.308	15.92	16.8	203.31	16.02	31.2	15.32	203.309	18.95	19.04	203.307	37.19	55.2	18.02
204.741	13.65	15.61	204.482	23.15	35.91	19.48	204.476	15.94	16.6	204.479	16.46	29.99	16.76	204.475	19.62	19.62	204.476	36.67	54.39	15.32
205.911	13.75	15.77	205.65	22.14	38.01	20.53	205.644	15.97	16.47	205.645	16.37	28.77	15.95	205.641	18.59	19.57	205.645	35.31	53.17	16.66
207.081	14.31	14.49	206.82	23.45	54.64	22.2	206.813	16.17	16.11	206.813	16.41	29.23	15.99	206.811	18.13	19.66	206.813	35.01	55.56	16.95
208.253	14.32	14.65	207.989	22.4	109.62	21.19	207.981	16.04	17.09	207.981	17.51	28.25	16.14	207.979	18.32	19.61	207.981	34.23	56.75	17.16
209.423	14.14	14.08	209.158	22.65	72.99	21.1	209.149	16.02	16.78	209.149	17.02	29.55	15.7	209.148	18.23	33.26	209.15	35.89	55.29	16.44
210.594	13.34	14.04	210.326	21.38	48.96	23.69	210.317	17.48	16.71	210.317	16.41	30.18	16.57	210.317	18.99	41.82	210.318	35.48	55.49	15.55
211.765	13.82	14.87	211.493	21.28	39.67	22.6	211.486	16.35	16.47	211.486	16.73	30.19	16.38	211.485	19.14	31.81	211.486	35.56	55.02	15.84
212.934	14.16	14.44	212.661	21.6	35.35	22.97	212.653	17.16	17.21	212.655	16.43	28.35	15.77	212.653	18.6	24.86	212.654	37.04	55.25	16.09
214.104	13.67	14.05	213.829	21.54	34.66	20.57	213.822	17.69	16.02	213.824	16.51	29.13	16.42	213.821	17.98	22.09	213.822	37.33	54.38	16.22
215.272	15.05	15.05	214.998	23.51	35.35	20.02	214.99	16.34	17.11	214.992	16.38	28.23	15.96	214.987	17.91	20.71	214.991	36.87	55.01	16.68
216.44	13.99	14.19	216.168	24.54	37.06	21.93	216.158	17.73	16.72	216.16	16.78	28.54	16.08	216.157	18.53	19.68	216.16	36.51	57.15	18.06
217.656	13.81	15.04	217.336	25.2	35.49	22.07	217.326	16.02	16.32	217.328	16.44	28.87	15.25	217.325	18.43	19.21	217.33	36.51	55.64	17.7
219.23	13.66	14.45	218.505	24.09	34.71	21.02	218.494	16.88	16	218.496	16.08	28.57	16	218.493	18.45	19.87	218.498	36.42	56.1	16.69
220.402	13.64	14.83	219.673	25.2	35.45	19.9	219.662	16.35	16.45	219.664	16.25	28.31	16.03	219.662	18.97	19.03	219.666	36.59	56.74	17.79
221.571	21.78	15.48	220.84	23.36	40.28	19.46	220.831	17.01	16.77	220.832	16.59	29.43	15.54	220.831	18.36	19.36	220.834	36.14	55.76	18.73
222.742	23.41	14.95	222.008	22.53	45.07	20.83	221.999	17.11	15.9	222.001	16.67	28.44	15.82	221.999	18.71	20.29	222.002	35.28	55.02	18.62
223.913	17.61	14.78	223.176	21.93	39.43	24.06	223.168	16.85	16.02	223.169	16.79	29.49	16.48	223.167	17.43	39.24	223.17	36.08	55.54	16.59
225.081	15.07	14.84	224.344	20.97	40.2	101.46	224.337	17.05	16.07	224.337	16.33	29.27	15.4	224.335	18.1	39.94	224.339	36.98	58.39	16.54
226.251	15.12	14.54	225.512	22.36	106.1	76.44	225.505	17.02	16.25	225.506	16.39	29.02	16.5	225.503	19.8	29.46	225.505	38.39	56.67	16.99
227.422	14.17	14.25	226.68	22.64	81.07	49.31	226.673	16.23	16.09	226.676	17.25	29.52	15.87	226.671	19.02	24.21	226.673	37.33	57.23	17.06
228.593	14.75	14.19	227.849	21.38	55.25	32.78	227.841	16.43	16.11	227.844	16.57	29.22	16.43	227.837	18.33	20.9	227.841	37.4	55.71	16.99
229.765	13.24	15.33	229.018	21.21	43.41	26.79	229.007	16.72	17.26	229.013	16.96	28.59	15.86	229.006	18.5	19.04	229.009	36.54	54.04	18.08
230.935	13.08	15.03	230.187	21.51	38.12	22.57	230.176	17.48	16.52	230.182	16.24	28.95	16.25	230.173	17.85	19.48	230.177	36.26	56.31	17.99
232.103	13.89	14.8	231.355	21.64	35.62	21.17	231.345	17.06	14.99	231.351	17.16	29.91	16.76	231.341	17.56	19.69	231.345	36.75	54.09	17.77
233.273	13.42	15.55	232.523	23	39.62	20.89	232.514	17.62	16.61	232.519	16.59	28.93	17.23	232.509	17.96	19.49	232.513	38.38	54.43	17.85
234.443	13.37	15.59	233.691	23.4	40.07	20.23	233.682	16.94	16.51	233.687	16.78	30.4	16.54	233.677	18.36	18.48	233.682	38.16	58.41	17.16
235.611	14.4	25.26	234.859	23.22	38.5	21.21	234.85	16.03	15.83	234.852	16.8	29.48	17.47	234.845	19.31	19.53	234.849	38.62	56.65	17.01
236.779	13.98	19.05	236.025	22	38.13	20.02	236.018	17.49	16.37	236.021	16.14	29.25	16.59	236.013	17.94	20.07	236.017	37.56	54.84	16.2
237.95	13.97	16.37	237.193	24.79	37.46	19.66	237.186	17.95	16.36	237.189	17.57	29.47	16.19	237.179	18.08	19.37	237.185	36.63	54.79	18.68
239.12	14.5	15.34	238.362	155.78	38.97	20.08	238.352	16.58	16.75	238.357	16.89	29.34	16.71	238.348	18.79	21.34	238.353	36.57	56.24	17.89
240.29	14.28	15.1	239.53	142.39	45.98	38.55	239.521	17	16.66	239.526	17.6	28.61	16.26	239.515	18.74	42.74	239.521	36.18	54.4	16.45
241.458	13.77	15.25	240.698	78.58	40.98	89.99	240.687	16.41	16.51	240.694	17.01	29.73	16.59	240.683	18.2	32.98	240.689	36.52	54.41	19.26
242.624	14.34	14.95	241.866	39.07	38.04	53.16	241.856	17.23	16.67	241.862	17.07	28.24	15.93	241.851	19.02	25.24	241.857	36.17	53.44	21.58
243.792	13.89	13.78	243.034	27.92	36.11	32.02	243.025	17.02	17.32	243.03	16.76	29.05	16.5	243.019	18.4	21.85	243.025	35.88	54.57	19.1
244.962	13.48	15.4	244.202	23.32	35.15	24.19	244.191	16.23	16.68	244.198	16.59	29.74	16.43	244.187	18.65	19.85	244.194	36.73	55.44	18.26
246.131	13.59	14.5	245.368	20.64	37.02	21.98	245.359	16.8	16.01	245.367	16.33	28.52	15.82	245.353	18.8	19.43	245.363	36.65	54.97	16.68
247.299	13.57	14.38	246.537	20.46	34.8	20.1	246.527	16.77	16.23	246.535	16.46	29.83	15.87	246.521	18.49	18.43	246.531	36.32	55.23	16.81
248.466	13.57	15.05	247.705	20.27	36.68	19.57	247.695	16.18	16.48	247.703	16.79	29.52	16.13	247.69	18.9	20.3	247.697	37	55.69	15.63
249.634	14.04	15.13	248.873	20.47	42.79	19.22	248.863	17.42	16.53	248.871	16.8	29.48	15.87	248.857	17.83	20.92	248.865	37.07	54.76	16.03
250.807	14.03	15.24	250.041	19.57	115.14	19.1	250.031	16.9	16.45	250.039	17.09	29.55	15.9	250.025	18.23	20.26	250.033	38.09	58.17	16.3
251.975	13.53	14.85	251.209	20.83	88.95	19.36	251.2	18.09	16.37	251.207	16.53	29.78	16.37	251.193	17.94	19.14	251.199	37.48	57.76	17.12
253.143	13.69	14.92	252.375	19.86	59.69	19.9	252.369	17.04	16.49	252.375	16.53	29.78	16.63	252.361	18.87	19.36	252.368	35.45	57.38	19.26
254.311	14.09	14.13	253.543	20.33	45.83	20.16	253.537	16.61	15.98	253.543	17.45	30.44	16.99	253.529	17.66	19.01	253.534	35.54	55.63	16.78
255.479	25.39	14.61	254.711	21.76	38.4	20.31	254.706	17.18	17.11	254.712	17.2	29.94	16.2	254.695	18.11	21.04	254.703	36.65	57	16.96
256.647	20.69	15.16	255.879	22.42	35.59	21.64	255.876	16.13	16.78	255.878	16.71	29.68	16.5	255.863	18.22	23.37	255.869	36.6	59.02	15.69
257.814	16.9	19.19	257.048	22.64	34.08	20.16	257.042	17.25	16.1	257.046	16.65	30.19	16.45	257.032	18.74	43.39	257.037	37.64	57.99	15.44
258.982	14.89	23.68	258.216	21.46	36.75	19.56	258.211	17.13	17.25	258.214	16.21	29.19	17.4	258.2	18.42	32.87	258.205	37.96	56.74	17.98
260.15	14.8	18.26	259.384	20.96	35.7	19.85	259.38	15.43	16.83	259.382	16.88	28.2	17.21	259.368	19.41	25.85	259.373	37.8	56.89	17.34
261.318	13.28	16.53	260.552	21.77	36.05	20.63	260.549	17.16	16.61	260.55	17.07	29.69	17.68	260.534	18.32	22.69	260.541	36.48	56.57	17.22
262.486	13.97	16.19	261.718	21.69	35.95	19.25	261.717	16.52	17.11	261.718	16.75	27.24	17.67	261.703	18.4	20.87	261.709	36.21	59.64	17.05
263.654	13.71	15.63	262.886	21.68	35.35	19.55	262.885	16.2	17.18	262.886	16.98	27.78	17.25	262.873	18.42	19.18	262.876	35.85	57.36	16.54
264.822	13.62	15.06	264.054	22.08	36.82	18.79	264.053	16.79	16.38	264.054	17.04	28.84	16.5	264.039	18.27	18.85	264.044	34.27	55.23	17.77
265.991	13.92	14.83	265.223	21.79	36.91	19.54	265.221	16.35	17.1	265.22	17.17	29.85	16.14	265.207	19.65	19.4	265.212	36.19	54.57	17.78
267.158	13.89	14.51	266.391	22.25	115.07	18.62	266.389	16.6	16.81	266.389	17.08	28.73	16.32	266.376	18.99	19.34	266.38	36.37	55.27	16.95
268.327	14.73	13.92	267.559	25.61	80.41	19.86	267.557	17.28	16.33	267.557	17.43	29.71	16.4	267.544	18.19	20.14	267.548	35.71	55.44	16.59
269.495	15.29	14.5	268.727	23.9	54.58	19.5	268.726	17.7	17.15	268.723	17.24	29.7	15.96	268.712	18.34	20.44	268.714	37.59	56.89	17
270.663	14.74	14.89	269.895	22.25	41.36	18.82	269.895	17.68	16.34	269.891	16.97	31.06	15.3	269.88	17.8	19.93	269.882	36.09	56.45	16.88
271.831	14.73	15.02	271.064	21.07	35.89	19.56	271.063	17.88	16.77	271.061	16.95	30.13	16	271.049	18.22	20.7	271.051	36.13	56.12	18.72
272.999	23.02	13.86	272.233	21.13	35.6	19.52	272.231	18.81	16.09	272.229	18.11	29.77	16.93	272.217	17.7	21.59	272.22	36.85	56.24	18.92
274.167	22.33	15.54	273.401	22.17	34.36	18.76	273.399	17.32	16.66	273.398	17.37	30.39	16.51	273.385	18.59	21.69	273.388	36.47	55.51	17.36
275.335	17.85	14.83	274.568	21.42	34.86	20.47	274.568	17.65	16.99	274.567	17.44	29.34	16.31	274.554	18.49	23.96	274.556	37.25	58.64	15.55
276.502	15.65	15.36	275.737	21.02	53.65	21.27	275.734	17.56	17.76	275.736	16.05	29.05	16.31	275.724	19.17	21.76	275.723	39.49	54.93	16.9
277.67	15.11	15.04	276.905	21.35	99.78	85.82	276.903	16.65	17.79	276.905	16.43	28.83	15.8	276.892	18.55	20.5	276.892	40.19	56.12	16.3
278.838	14.1	16.76	278.073	21.7	62.75	79.2	278.07	17.57	16.61	278.073	16.07	29.83	16.31	278.06	18.94	21.31	278.06	38.09	57.05	16.59
280.006	13.91	24.99	279.241	21.07	48.84	48.5	279.236	17.79	16.86	279.241	17.06	30.08	16.68	279.226	18.61	22.7	279.228	36.84	54.48	16.59
281.174	13.75	18.52	280.407	22.19	39.95	29.78	280.404	17.45	16.66	280.411	16.89	28.99	16.55	280.394	18.65	20.72	280.396	34.67	55.69	18.49
282.342	14.6	16.74	281.576	23.39	37.26	24.94	281.572	17.17	17.16	281.579	16.41	29.52	16.18	281.563	18.08	20.36	281.562	35.57	55.28	18.6
283.51	13.57	15.21	282.743	23.36	37.27	23.87	282.738	18.75	16.54	282.747	16.22	28.32	16.29	282.729	18.54	20.44	282.73	35.73	55.39	18.04
284.678	13.76	15.19	283.912	22.44	37.11	21.66	283.906	16.27	17.26	283.913	16.56	28.18	16.4	283.897	18.45	20.77	283.898	36.38	56.32	17.34
285.845	13.12	14.31	285.08	22.47	38.1	20.69	285.074	16.64	16.12	285.082	16.08	27.92	16.76	285.065	19.18	20.62	285.066	37.91	57.42	17.56
287.014	13.38	14.2	286.248	20.87	38.36	20.23	286.244	17.19	16.43	286.251	16.51	29.31	16.28	286.233	17.92	20.47	286.235	38.82	53.69	17.77
288.182	14.23	14.21	287.416	21.46	37.04	19.2	287.413	16.44	16.2	287.42	15.68	28.27	16.78	287.401	20.23	21.17	287.401	38.05	56.59	16.12
289.348	13.46	14.03	288.584	22.84	98.64	19.81	288.581	17.03	17.28	288.588	16.28	29.09	16.7	288.569	19.65	22.05	288.569	38.7	133.3	17.52
290.516	13.6	14.47	289.753	23.44	96.59	19.62	289.749	16.42	16.36	289.756	16.37	28.33	16.43	289.738	19.64	21.18	289.737	38.82	127.02	17.64
291.684	14.04	14.15	290.922	25.39	63.94	19.34	290.917	17.09	17.13	290.922	16.72	29.44	16.98	290.907	19.41	20.45	290.905	38	93.52	18.35
292.852	13.85	14.44	292.089	24.08	46.25	21.36	292.085	16.07	16.24	292.09	16.54	29.29	16.11	292.073	19.3	21.68	292.073	36.55	72.1	17.3
294.02	23.07	14.68	293.258	22.86	39.18	20.61	293.254	16.66	16.47	293.256	16.52	29.45	16.58	293.241	19.68	25.24	293.241	37.25	60.61	17.07
295.186	21.11	14.51	294.426	21.82	35.38	19.59	294.421	16.25	16.18	294.422	16.61	29.42	16.39	294.408	19.8	42.99	294.409	36.18	55.85	17.65
296.355	16.52	15.07	295.594	20.8	34.15	19.3	295.589	17.36	16.71	295.591	17.12	30.15	16.61	295.576	19.16	33.34	295.577	35.89	52.75	16.27
297.521	15.25	14.24	296.762	20.89	32.47	19.28	296.755	17.08	17.39	296.758	16.51	29.99	16.63	296.744	18.76	24.46	296.746	35.66	53.74	18.39
298.689	13.29	14.52	297.93	21.73	33.49	19.33	297.923	17	16.4	297.926	16.39	28.78	16.59	297.912	18.9	22.71	297.915	36.17	53.03	17.49
299.857	13.96	14.66	299.098	21.48	35.64	19.45	299.091	17.47	16.08	299.094	16.57	29.4	16.86	299.079	17.94	20.93	299.083	35.69	51.18	16.89
301.025	13.39	14.78	300.266	21.88	35.13	19.18	300.259	17.4	15.69	300.262	16.9	28.71	16.91	300.248	18.38	20.1	300.251	35.64	50.1	16.15
302.193	13.3	18.51	301.435	20.53	35.28	18.94	301.427	16.54	16.17	301.432	16.27	27.93	16.78	301.414	18.25	20.02	301.419	38.08	51.05	17.78
303.361	13.5	25.03	302.604	22.43	35.34	19.18	302.595	17.05	16.69	302.603	17.04	27.17	16.87	302.582	19.53	18.46	302.587	38.78	50.23	17.63
304.531	13.93	18.6	303.772	24.32	37.63	19.34	303.764	17.22	16.55	303.774	17.28	28.67	16.34	303.75	18.2	19.23	303.755	37.81	50	18.43
305.699	13.39	16.56	304.94	22.79	80.3	20.5	304.933	17.05	16	304.942	17.2	28.87	17.06	304.918	18.58	20.2	304.924	36.66	53.29	18.64
306.867	14.28	15.18	306.108	25.14	96.22	21.06	306.101	17.26	17.04	306.11	17.41	27.75	16.33	306.086	19.55	18.84	306.091	38.22	52.08	17.9
308.035	13.1	14.47	307.276	24.67	63.03	22.46	307.269	16.93	15.98	307.28	17	28.77	16.22	307.254	19.06	19.76	307.26	35.54	51.82	16.94
309.204	16.95	14.95	308.445	22.45	46.48	21.06	308.437	16.73	16.12	308.448	16.65	28.43	17	308.423	18.43	20.49	308.428	36.23	51.5	16.44
310.371	24.02	14.94	309.614	21.06	37.34	20.07	309.605	16.78	16.49	309.616	16.66	29.39	16.41	309.591	18.62	41.53	309.596	35.35	52.98	16.83
311.539	18.78	14.24	310.781	20.63	34.55	19.4	310.774	16.85	16.9	310.784	16.18	29.39	17.01	310.76	19.27	39.26	310.766	36.52	53.4	17.86
312.708	15.64	14.93	311.949	20.57	34.41	19.49	311.943	16.68	15.7	311.953	17.14	30.4	17.2	311.929	19.58	27.94	311.934	37.6	53.01	18.97
313.875	14.93	14.77	313.117	20.2	32.99	19.09	313.112	17.67	16.65	313.12	16.32	27.59	16.9	313.103	45.37	23.23	313.102	37.45	49.96	17.89
315.043	14.23	15.04	314.285	20.96	33.02	20.74	314.281	16.97	16.65	314.288	16.71	29.01	18.11	314.27	44.88	20.64	314.27	37.12	52.46	16.92
316.211	13.88	14.83	315.453	20.4	34.31	19.99	315.452	16.48	15.76	315.456	17.13	29.04	17.82	315.438	31.71	20.22	315.439	37.57	52.64	17.46
317.379	13.21	14.72	316.621	20.52	35.41	19.6	316.62	16.84	16.5	316.624	16.87	30.18	18.33	316.604	25.12	18.9	316.607	41.01	51.24	18.8
318.548	13.66	15.38	317.789	21.9	34.92	20.16	317.787	16.87	17.05	317.792	16.14	30.39	18.61	317.772	23.08	19.81	317.775	41.92	53.44	19.14
319.714	14.62	14.56	318.958	22.56	36.18	18.32	318.956	17.19	16.48	318.96	17	30.29	18.08	318.941	20.31	18.73	318.943	39.77	55.9	18.61
320.882	14.08	14.23	320.127	176.82	36.77	19.39	320.124	16.69	16.67	320.128	17.04	28.72	18.03	320.11	19.15	18.53	320.111	39.24	56.65	18.25
322.05	13.27	15.19	321.295	119.1	39.08	19.76	321.293	16.39	16.55	321.297	16.28	29.8	17.79	321.277	18.53	19.47	321.279	37.94	56.75	19.04
323.217	13.67	13.98	322.462	58.82	36.44	19.4	322.46	16.18	16.13	322.464	17.28	29.39	17.75	322.445	17.96	44.36	322.447	36.86	55.12	19.26
324.385	13.44	15.41	323.631	32.66	36	20.8	323.629	17.14	16.83	323.632	17.93	29.18	17.78	323.613	17.1	34.1	323.616	36.99	55.36	18.54
325.553	14.08	14.72	324.799	25.03	39.04	22.08	324.797	16.26	17.51	324.798	16.56	28.77	17.21	324.781	17.85	25.25	324.784	37.26	56.94	17.84
326.721	13.3	26	325.967	23.75	41.63	21.86	325.963	16.78	16.23	325.967	16.91	28.31	17.03	325.949	17.13	22.96	325.953	37.59	55.15	18.13
327.889	14.28	21.4	327.133	20.72	38.32	20.64	327.131	18.03	15.94	327.137	16.59	29.39	16.79	327.118	17.73	20.7	327.122	38.92	57.32	18.08
329.055	22.76	16.75	328.302	20.86	45.32	21.04	328.299	17.44	17.27	328.305	16.31	29.42	16.14	328.287	17.64	18.84	328.29	38.73	57.38	20.01
330.223	21.28	15.5	329.471	20.71	44.05	20.7	329.467	18.56	16.74	329.473	16.77	30.32	17.02	329.453	17.46	19.37	329.458	40.73	54.85	21.47
331.391	18.1	14.55	330.639	20.79	39.13	21.47	330.635	17.86	16.32	330.642	16.27	30.15	16.72	330.621	17.93	18.78	330.626	42.48	54.86	21.23
332.559	15.13	14.62	331.807	20.7	38.26	20.28	331.804	17.23	17.33	331.81	15.86	29.01	17.44	331.789	18.07	18.91	331.794	40.98	54.76	19.32
333.727	14.17	14.52	332.974	20.48	41.52	19.96	332.973	16.83	16.24	332.978	16.6	29.18	17.28	332.957	18.42	19.45	332.962	37.9	55.81	19.15
334.895	13.85	14.31	334.141	21.84	38.06	42.96	334.141	17.39	16.96	334.146	16.13	30.7	16.1	334.125	18.18	20.15	334.128	37.95	55.04	18.86
336.063	13.71	14.82	335.308	22.64	42.49	91.7	335.309	16.95	16.48	335.312	16.56	29.4	16.11	335.293	18.46	19.21	335.297	37.25	56.25	18.27
337.231	13.01	14.18	336.476	22.01	43.08	59.15	336.477	17.42	16.85	336.48	17.38	29.03	16.58	336.463	19.02	19.81	336.465	37.73	55.16	18.44
338.398	13.58	14.54	337.645	21.52	36.57	35.29	337.645	16.66	16.39	337.649	16.47	30.15	16.02	337.631	18.97	20.78	337.631	37.04	54.85	18.91
339.567	13.48	14.33	338.813	20.61	37.56	26.28	338.813	17.32	16.45	338.817	16.74	27.91	16.63	338.8	18.07	42.97	338.799	36.89	51.87	19.06
340.735	14.81	14.98	339.981	23.28	38.84	23.28	339.981	16.99	16.93	339.985	16.39	28.16	16.53	339.968	18.57	37.3	339.965	37.95	52.99	18.29
341.903	13.61	15.43	341.149	23.74	36.6	20.86	341.15	16.26	16.56	341.154	16.99	27.56	15.93	341.136	18.91	28.46	341.133	38.1	57.51	19.12
343.071	13.95	14.88	342.317	25.35	37.22	20.65	342.319	17.71	17.23	342.322	16.98	28.62	16.86	342.302	18.53	22.9	342.301	38.59	53.93	18.84
344.237	13.2	14.85	343.485	24.26	40.09	20.26	343.487	17.35	16.8	343.49	16.21	27.41	16.74	343.47	18.43	21.25	343.469	41.6	51.61	17.7
345.405	13.16	14.87	344.653	24.66	40.13	19.35	344.653	17.22	16.48	344.658	16.67	27.82	16.76	344.64	18.83	20.14	344.638	41.12	54.32	19.17
346.573	13.87	14.77	345.821	21.94	39.78	19.44	345.823	17.33	16.43	345.826	16.68	28.71	16.8	345.808	18.41	19.87	345.806	42.78	57.72	18.48
347.739	12.94	14.89	346.991	21.93	40.42	20.04	346.989	16.47	17.5	346.995	16.94	28.77	16.78	346.977	18.97	19.43	346.974	41.98	55.98	18.59
348.908	13.51	14.95	348.157	21.04	114.26	84.49	348.157	16.62	17.13	348.163	16.72	30.73	15.81	348.144	18.25	19.59	348.143	39.61	58.84	19.7
350.077	13.56	15.2	349.325	121.61	90.76	69.13	349.326	16.52	16.86	349.331	15.82	29.6	16.87	349.312	18.32	20.11	349.311	38.53	57.44	19.67
351.245	13.7	14.53	350.495	145.94	67.64	41.02	350.494	17.42	16.34	350.499	16.27	28.5	16.7	350.48	18.93	20.26	350.48	36.78	56.98	19.33
352.413	14.1	14.57	351.665	180.85	50.59	27.71	351.662	16.32	17.23	351.667	16.32	28.79	16.73	351.646	18.97	20.96	351.648	36.59	55.13	17.86
353.581	13.6	14.48	352.833	122.83	42.07	22.38	352.83	16.93	15.94	352.835	16.59	29.78	16.99	352.814	19.11	21.04	352.816	38.39	56.88	19.07
354.749	13.63	14.88	354.006	61.89	36.68	21.34	353.998	16.81	16.8	354.003	16.87	29.19	16.32	353.98	18.48	19.95	353.985	37.94	58.61	18.63
355.917	13.58	20.54	355.174	40.53	37.15	19.87	355.166	17.33	16.62	355.171	16.14	29.31	16.68	355.148	17.49	21.21	355.153	45.36	59.41	18.18
357.083	14.13	22.86	356.343	30.57	36.07	19.53	356.334	17.08	16.88	356.338	16.76	29.6	16.22	356.317	18.39	20.04	356.321	143.08	62.86	18.69
358.252	13.99	18.22	357.511	25.39	36.07	17.88	357.502	17.27	17	357.507	16.5	30.07	16.49	357.483	18.13	20.09	357.489	121.8	59.16	18.57
359.419	14.05	16.24	358.679	23.3	36.33	18.26	358.67	17.46	17.46	358.676	16.85	29.28	16.71	358.651	18.83	20.82	358.657	78.51	57.95	19.89
360.587	13.18	15.04	359.847	21.07	37.72	19.51	359.837	17.33	17.06	359.842	17.51	29.08	16.71	359.819	19	19.68	359.825	55.75	59.36	18.44
361.755	13.66	15.21	361.016	20.67	34.98	19.7	361.006	17.3	16.15	361.012	17.25	28.57	17.14	360.985	18.91	20.69	360.993	44.93	59.91	18.92
362.921	13.02	14.84	362.184	20.24	34.91	18.63	362.172	17.06	16.35	362.18	16.44	29.05	17.67	362.153	18.9	20.66	362.16	39.75	58.02	20.31
364.089	13.77	14.04	363.353	19.77	35.55	18.88	363.337	16.56	17.06	363.348	16.34	30.09	17.21	363.321	18.7	20.07	363.328	38.06	58.69	24.06
365.257	18.53	14.71	364.522	20.39	37.5	19.64	364.506	17.03	16.37	364.516	16.25	28.67	17.08	364.489	18.74	22.65	364.496	37.4	57.84	88.71
366.423	23.81	13.77	365.69	20.18	35.63	20.01	365.672	16.75	15.85	365.683	16.74	29.97	17.58	365.658	18.91	45.32	365.664	36.08	55.49	68.73
367.592	18.74	15.12	366.858	20.46	33.87	18.5	366.84	16.11	15.67	366.852	17.23	28.82	17.63	366.826	18.66	35.58	366.832	36.8	58.08	43.89
368.759	15.95	14.58	368.026	21.04	33.85	18.59	368.008	16.13	16.67	368.019	16.77	29.09	17.81	367.994	19.06	27.15	368.001	36.55	58.04	30.92
369.927	14.67	14.62	369.194	21.45	36.04	18.11	369.177	16.83	16.41	369.187	16.39	28.7	17.9	369.162	18.82	21.93	369.167	36.41	57.45	24.02
371.094	14.07	15.26	370.36	21.17	40.28	18.75	370.345	16.93	17.01	370.355	15.93	29.5	16.71	370.328	18.81	21.01	370.335	35.3	55.18	21.38
372.263	14.43	15.62	371.529	21.93	38.11	19.89	371.513	16.33	16.88	371.521	16.78	30.47	18.09	371.497	18.68	20.04	371.503	35.96	58.31	20.22
373.431	13.71	14	372.697	21.56	37.48	19.06	372.679	17.5	16.87	372.689	16.55	29.04	17.33	372.664	18.85	19.42	372.671	35.86	61.4	18.97
374.599	13.61	15.17	373.866	21.58	34.9	19.84	373.847	17.55	16.97	373.857	17.15	28.72	17.21	373.829	19.7	18.84	373.839	36.38	62.56	18.67
375.765	13.59	15.31	375.034	20.95	34.52	19.62	375.015	17.16	18.02	375.026	16.72	28.89	17.15	375	19.59	18.79	375.007	36.44	56.52	18.58
376.934	13.81	15.14	376.202	20.23	35.63	19.14	376.186	16.54	17.2	376.194	16.2	28.39	16.87	376.166	19.93	19.54	376.175	37.05	58.43	17.93
378.101	13.96	14.34	377.37	20.54	39.05	20.54	377.354	17.24	17.14	377.362	16.62	28.87	17.32	377.334	19.17	18.58	377.344	37.41	56.48	19.48
379.267	13.59	14.37	378.538	20.62	37.01	19.67	378.523	17.21	17.11	378.53	16.92	29.6	16.57	378.5	18.04	19.52	378.511	37.01	57.24	18.28
380.435	14.14	15.35	379.706	20.79	43.94	19.05	379.691	16.53	17.18	379.698	16.98	30.32	16.18	379.666	18.49	19.57	379.679	36.13	58.12	16.57
381.603	17.96	14.81	380.875	21.99	109.36	20.25	380.859	15.71	16.82	380.864	17.67	30.41	16.72	380.834	18.14	19.8	380.846	37.24	56.64	16.28
382.771	22.75	14.32	382.044	27.04	73.14	20.09	382.025	16.1	16.94	382.032	16.63	30.95	16.41	382.001	18.37	19.78	382.014	36.76	56.64	17.61
383.937	17.64	14.32	383.213	164.15	52.37	20.06	383.193	16.93	16.58	383.201	16.68	31.25	16.85	383.169	18.77	20.15	383.182	36.24	58.4	18.2
385.103	15.27	14.77	384.381	114.22	41.69	20.67	384.361	16.96	16.45	384.367	16.63	29.49	16.43	384.337	19.48	20.12	384.35	37.13	56.14	18.21
386.272	14.5	14.86	385.549	170.31	36.65	20.69	385.53	15.86	17.08	385.535	16.89	28.92	16.9	385.505	18.4	21.26	385.518	37.64	55.53	18.18
387.44	13.57	15.22	386.717	93.42	36.71	19.98	386.698	17.62	16.97	386.701	16.34	30.92	16.29	386.673	19.72	19.5	386.686	38.58	56.97	17.91
388.608	13.91	14.01	387.885	50.91	33.88	19.5	387.867	16.97	16.34	387.869	17.28	29.17	16.27	387.841	18.98	19.91	387.855	37.41	58.99	18.62
389.776	13.48	14.43	389.054	33.08	35.68	19.56	389.035	16.34	15.96	389.037	16.64	29.32	16.69	389.007	18.96	20.88	389.023	38.48	58.67	16.64
390.944	14.19	14.36	390.222	26.76	36.66	19.67	390.201	16.23	16.65	390.205	16.18	28.7	15.82	390.176	18.85	20.97	390.191	38.15	61.42	17.26
392.112	13.06	14.32	391.39	22.78	34.83	19.67	391.369	17.28	16.53	391.373	16.79	29.83	16.31	391.342	19.32	21.14	391.359	39.1	62.33	17.44
393.28	13.62	15.1	392.557	21.69	83.45	20.18	392.537	17.65	16.3	392.542	16.16	29.01	16.52	392.511	19.12	21.14	392.527	37.76	56.9	17.77
394.448	13.48	14.17	393.725	20.72	92.79	20.46	393.706	16.51	16.99	393.711	16.95	28.79	15.85	393.679	18.86	20.9	393.693	37.84	56.46	18.09
395.617	23.73	13.93	394.893	19.6	61.28	20.83	394.875	16.87	16.8	394.88	17.41	30	15.93	394.847	18.16	20.59	394.861	38.73	56.62	17.58
396.785	24.18	14.3	396.059	19.57	45.79	21.3	396.043	17.3	16.28	396.046	16.66	27.9	15.81	396.015	19.32	19.95	396.03	41.09	56.75	17.29
397.953	19.84	13.9	397.227	18.51	38.91	20.63	397.211	16.9	16.48	397.214	16.93	29.92	16.15	397.185	18.92	19.95	397.199	40.16	56.98	17.72
399.121	16.9	14.86	398.395	19.9	36.25	20.16	398.379	16.78	17.02	398.382	17.59	29.14	16.2	398.351	18.91	43.48	398.367	39.14	58.7	18.24
400.287	14.76	14.71	399.563	20.03	35.87	20.19	399.545	16.78	16.37	399.55	16.7	30.01	15.33	399.52	19.49	39.48	399.535	37.87	57.55	18.15
401.455	14.51	13.83	400.732	20.06	34.33	19.89	400.713	16.61	16.5	400.721	17.04	29.66	15.82	400.689	18.99	30.58	400.703	40.04	57.05	19.43
402.623	14.18	14.22	401.901	20.16	34.78	20.57	401.882	16.52	16.33	401.89	16.85	29.6	15.85	401.858	19.07	24.14	401.871	40.57	58.38	17.79
403.791	13.78	13.93	403.069	20.65	73.32	22.52	403.049	16.55	16.25	403.057	17.09	29.32	15.87	403.026	18.99	21.67	403.037	39.59	56.77	18.39
404.959	17.14	14.98	404.237	22.04	95.88	98.04	404.218	17.57	16.75	404.225	17.04	30.28	16.22	404.194	18.71	20.97	404.205	39.04	55.59	20.52
406.127	22.89	14.33	405.405	21.06	63.51	63.99	405.387	16.46	16.07	405.393	17.08	28.95	16.69	405.362	19.03	19.84	405.373	39.14	57.83	18.67
407.295	18.04	14.72	406.573	21.59	45.58	38.45	406.555	17.19	16.28	406.561	16.93	29.44	16.29	406.53	18.97	19.69	406.542	40.13	59.41	19.21
408.463	16.02	14.87	407.741	20.78	37.6	27.69	407.723	15.95	16.72	407.729	16.99	28.95	16.71	407.696	19.23	20.57	407.71	41.39	59.99	19.21
409.631	14.3	14.65	408.91	21.11	35.94	23.71	408.891	16.59	16.66	408.896	16.31	28.64	16.86	408.864	19.1	22.15	408.878	39.66	56.54	19.91
410.799	13.73	13.76	410.079	20.89	35.16	20.9	410.059	16.76	16.91	410.064	16.17	29.67	16.78	410.033	18.97	21.28	410.047	40.01	55.58	18.77
411.967	13.41	13.68	411.247	20.3	33.97	19.52	411.227	16.84	16.85	411.234	16.85	30.14	16.45	411.204	19.06	19.49	411.215	40.79	55.25	18.93
413.134	13.36	14.29	412.415	20.69	34.61	19.09	412.393	17.13	15.81	412.403	16.86	29.84	15.49	412.374	19.48	19.43	412.383	40.1	55.64	17.89
414.302	13.48	14.03	413.583	21.71	35.23	20.57	413.562	16.63	16.53	413.571	16.64	29.02	16.92	413.54	19.12	19.96	413.551	40.44	56.07	18.77
415.47	12.97	14.87	414.752	22.01	33.78	19.58	414.731	16.2	16.02	414.739	16.52	28.95	16.1	414.708	18.23	20.26	414.717	41.86	57.8	19.39
416.642	13.84	14.86	415.92	21.52	35.05	19.06	415.899	17.02	16.1	415.907	16.41	29.73	16.1	415.876	19.26	20.16	415.886	41.69	59.52	19.77
417.81	12.93	15	417.086	22.04	35.92	19.17	417.067	16.79	16.32	417.075	17.63	30.29	16.12	417.044	19.16	19.79	417.055	42.01	59.16	20.97
418.979	13.48	15.19	418.253	22.23	35.66	19.81	418.235	16.68	15.93	418.243	16.38	29.54	16.62	418.213	20.29	38.3	418.223	41.1	57.69	24.48
420.15	13.64	15.09	419.423	22.61	35.42	19.61	419.403	16.24	16.71	419.411	16.29	30.2	16.66	419.379	20.08	41.1	419.391	40.95	59.87	92.8
421.32	13.44	14.52	420.591	22.2	34.73	19.46	420.573	16.94	16.81	420.581	16.38	29.78	16.18	420.548	19.29	30.75	420.559	39.28	60.7	69.64
422.488	13.85	14.42	421.759	22.14	36.17	20.25	421.739	17.14	16.96	421.75	17.1	29.4	15.69	421.716	19.24	24.71	421.727	39.95	58.93	42.08
423.656	13.52	14.12	422.927	21.96	36.22	19.1	422.908	16.54	16.72	422.918	17.11	30.9	15.87	422.884	18.26	21.1	422.895	38.94	58.64	32.87
424.826	13.67	14.63	424.094	22.14	36.95	18.54	424.077	17.03	16.32	424.086	16.69	29.82	16.09	424.053	18.9	19.97	424.064	39.85	58.31	26.71
425.994	14.01	14.51	425.263	22.28	40.49	18.15	425.245	17.51	15.73	425.252	16.7	29.89	16.83	425.225	19.34	19.11	425.233	40.74	59.9	23.67
427.164	13.75	14.33	426.431	22.98	35.83	18.59	426.415	17.12	16.7	426.421	17.18	30.05	15.68	426.391	19.04	19.36	426.402	41.34	57.89	21.58
428.335	13.2	14.13	427.599	21.74	35.02	18.16	427.583	16.87	16.03	427.589	17.66	29	15.6	427.561	18.95	19.35	427.57	40.73	56.96	20.58
429.505	13.26	14.11	428.768	24.25	37.95	17.76	428.749	16.74	16.49	428.758	17.29	30.1	16.56	428.729	19.29	18.81	428.738	39.82	57.49	19.47
430.674	13.17	14.46	429.936	165.03	114.65	55.71	429.918	17.7	16.5	429.926	16.64	28.99	16.56	429.898	20.18	20.44	429.906	40.21	58.11	20.47
431.845	13.81	18.7	431.104	110.51	81	86.37	431.084	17.22	16.73	431.095	17.17	29.01	16.47	431.066	20.57	19.37	431.074	39.26	58.5	19.29
433.014	13.31	24.26	432.272	58.36	56.08	54.3	432.253	15.88	16.19	432.263	16.84	28.04	17.65	432.235	19.79	44.13	432.242	40.43	61.88	18.43
434.185	13.84	18.68	433.439	34.2	42.14	33.73	433.421	16.79	16.39	433.431	16.7	28.5	17.45	433.405	18.65	36.74	433.409	41.23	60.61	17.71
435.355	13.8	15.99	434.608	25.73	37	25.33	434.589	17.14	15.98	434.599	16.5	29.02	17.03	434.573	18.86	29.06	434.577	41.14	58.15	18.1
436.523	13.64	15.77	435.776	22.21	33.29	23	435.759	16.65	16.78	435.767	16.83	29.01	16.7	435.741	19.73	23.32	435.745	39.11	57.79	16.48
437.693	13.51	14.08	436.944	20.44	32.94	21.24	436.927	16.68	17.22	436.936	17.19	28.71	16.76	436.91	19.21	20.62	436.911	41.01	57.16	19.45
438.865	13.38	14.72	438.112	20	33.93	19.88	438.095	16.94	16.81	438.105	17.1	30.66	16.8	438.078	18.6	18.81	438.08	41.2	58.01	18.7
440.038	13.9	15.11	439.28	19.32	32.88	19.37	439.263	16.56	15.99	439.273	16.89	29.32	16.56	439.25	18.31	19.58	439.246	39.94	58.06	18.63
441.209	22.83	15.34	440.448	20.06	34.96	18.41	440.432	16.54	16.75	440.441	17.72	29.72	16.51	440.418	17.97	18.97	440.414	40.17	57.88	18.11
442.377	20.72	14.85	441.616	19.07	35.5	18.04	441.603	17.12	16.46	441.609	16.73	28.99	17.64	441.584	18.76	19.35	441.582	39.13	60.28	19.03
443.547	17.07	15.41	442.784	20.52	36.26	18.87	442.771	16.92	16.49	442.777	16.79	28.49	16.6	442.753	18.57	18.91	442.75	39.45	59.2	17.7
444.717	14.66	14.96	443.952	19.87	36.55	19.35	443.939	16.44	16.22	443.945	16.72	29.57	17.1	443.922	19.93	19.42	443.919	40.46	58.4	18.06
445.885	13.85	14.8	445.121	21.16	36.61	19.16	445.107	16.18	15.97	445.113	16.16	28.46	16.34	445.09	19.17	20.14	445.087	39.72	57.2	17.86
447.057	13.96	13.96	446.289	21.8	37.12	19.09	446.278	16	16.88	446.281	16.74	30.22	16.92	446.258	19.42	20.33	446.255	38.87	59.93	18.52
448.228	13.72	15.3	447.458	24.1	40.12	19.37	447.446	16.52	16.72	447.45	16.02	28.39	16.95	447.426	20.06	19.76	447.423	38.6	57.17	19.41
449.396	12.89	14.94	448.624	22.04	39.06	18.97	448.614	16.2	16.15	448.619	15.96	27.16	16.6	448.594	19.5	19.84	448.59	39.26	55.93	18.98
450.567	13.72	14.96	449.792	23.7	36.28	17.76	449.782	17.38	16.35	449.787	16.43	29.11	16.07	449.762	18.83	20.67	449.756	42.16	58.02	18.63
451.737	13.79	14.39	450.958	22.77	35.15	19.15	450.95	16.91	16	450.955	16.58	27.24	16.46	450.93	19.13	20.05	450.924	40.94	59.6	18.09
452.907	13.56	14.59	452.126	22.88	37.21	18.45	452.118	17.21	17.25	452.123	16.21	27.81	17.21	452.099	19.49	20.13	452.093	38.55	56.51	19.16
454.075	13.77	14.56	453.295	22.74	45.07	20.5	453.284	16.92	17.04	453.289	16.32	28.18	15.23	453.267	19.15	20.29	453.262	40.03	55.66	19.58
455.245	14.14	14.47	454.462	21.8	47.61	21.75	454.453	16.5	16.67	454.457	16.75	27.51	16.05	454.436	19.24	19.59	454.43	39.61	55.45	19.06
456.413	13.96	14.58	455.631	21.65	45.93	21.3	455.622	17.06	16.19	455.624	17.02	28.73	15.73	455.605	19.29	20.07	455.598	38.63	55.36	19.12
457.579	13.22	14.12	456.801	22.18	45.03	19.61	456.789	16.29	16.55	456.793	16.46	28.21	16.26	456.774	19.62	19.81	456.766	39.25	59.79	20.06
458.747	13.82	14.35	457.969	21.2	39.84	18.8	457.957	16.7	16.2	457.962	16.98	28.96	15.45	457.942	19.09	20.91	457.933	38.71	57.29	21.03
459.915	12.99	13.96	459.137	21.19	38.46	18.69	459.123	16.51	15.54	459.127	16.62	27.42	17.05	459.11	19.25	22.01	459.1	39.26	58.18	21.47
461.081	15.75	14.72	460.305	21.77	37.13	19.68	460.291	17.03	16	460.296	17.18	27.97	15.68	460.276	18.65	20.89	460.268	39.12	59.49	20.73
462.249	22.83	14.58	461.473	23.04	36.1	18.57	461.459	16.66	16.4	461.464	15.77	27.75	15.8	461.445	19.13	37.85	461.437	39.81	60.33	20.84
463.417	18.37	14.11	462.642	22.73	38.54	19.49	462.627	17.87	16.67	462.632	16.54	27.87	15.35	462.613	18.83	42.35	462.606	38.81	58.63	21.03
464.585	15.8	15.26	463.811	22.46	40.25	18.79	463.795	16.69	16.83	463.801	16.48	28.64	14.9	463.782	18.99	34.02	463.774	38.45	58.7	19.77
465.754	14.49	15.04	464.979	26.27	38.87	19.28	464.964	17.42	16.43	464.967	15.72	27.43	15.73	464.95	19.23	26.81	464.942	40.28	60.76	19.12
466.921	13.33	14.6	466.147	167.6	89.93	19.69	466.133	17.17	17.64	466.136	17.23	29.23	16.06	466.118	19.84	23.65	466.11	39.59	59.99	20.19
468.09	13.98	13.75	467.315	104.95	95.01	20.38	467.301	17.75	17.36	467.305	16.06	29.02	15.89	467.29	19.32	20.09	467.277	38.73	59.21	20.38
469.258	13.25	15.18	468.483	53.08	66.42	81.52	468.467	17.96	17.29	468.473	16.81	27.85	16.07	468.46	19.63	20.01	468.446	40.15	59.08	19.77
470.426	13.5	15.07	469.651	32.45	47.79	79.21	469.635	16.98	16.55	469.641	16.6	27.46	16.18	469.628	19.68	19.74	469.616	42.49	57.91	20.39
471.594	13.76	14.66	470.819	25.18	39.84	49.78	470.803	17.04	16.11	470.809	16.98	26.56	16.66	470.799	19.52	19.77	470.783	40.46	58.99	20.44
472.762	13.83	14.21	471.988	23.2	35.86	32.98	471.971	16.52	17.08	471.977	16.73	26.9	16.54	471.967	19.41	19.76	471.951	40.56	61.01	21.03
473.928	13.23	14.92	473.157	21.11	34.47	25.85	473.139	16.26	17.89	473.145	16.76	26.93	15.85	473.138	20.02	19.98	473.119	38.88	60.41	19.87
475.096	13.42	14.35	474.326	20.65	36.13	23.21	474.307	17.23	16.15	474.312	16.43	25.22	16.11	474.309	20.44	19.99	474.287	40.49	59.97	20.15
476.263	13.01	14.48	475.496	20.35	34.5	21.05	475.476	16.25	17.04	475.483	16.77	26.65	15.83	475.479	18.82	22.2	475.455	39.91	57.73	21.85
477.432	13.58	14.56	476.664	20.93	41.02	20.05	476.645	16.17	16.09	476.651	16.4	26.85	16.48	476.647	19.74	22.93	476.624	40.18	55.94	19.1
478.6	13.81	13.96	477.832	21.47	104.15	20.23	477.813	16.95	16.32	477.817	16.64	26.65	16.71	477.815	19.43	20.93	477.793	42.21	60.65	19.91
479.768	14.25	14.19	479.002	22.22	65.31	20.29	478.981	16.21	16.72	478.985	16.74	28.41	16.46	478.983	18.69	22.27	478.962	41.46	57.19	20.22
480.936	14.03	15.17	480.17	23.63	46.17	20.33	480.149	17.35	16.67	480.153	15.98	27.67	16.41	480.151	20.08	22.97	480.128	39.96	57.82	20.13
482.103	14.16	14.37	481.338	23.14	40.82	19.23	481.317	16.98	16.47	481.321	17.09	26.69	16.57	481.319	19.34	21.64	481.296	39.97	58.3	21.67
483.271	14.67	15.58	482.507	22.46	35.8	70.45	482.485	16.71	16.11	482.49	17.07	26.99	16.03	482.486	20.05	20.7	482.464	39.28	57.57	22.21
484.439	22.13	24.36	483.674	22.69	35.07	73.97	483.654	17.17	16.9	483.657	16.29	27.14	16.91	483.655	20.88	20	483.632	38.51	57.98	22.06
485.606	21.34	20	484.842	21.75	34.53	41.76	484.821	16.95	16.55	484.826	16.88	26.33	16.26	484.823	19.97	20.95	484.8	39.08	59.92	21.96
486.774	17.81	16.51	486.01	20.9	33.59	27.72	485.99	16.97	17.02	485.994	15.8	28.01	16.26	485.989	20.27	19.57	485.967	39.62	59.48	21.65
487.942	16.46	15.41	487.178	21.42	34.59	22.6	487.155	16.46	16.91	487.162	16.42	28.65	15.25	487.158	19.76	19.78	487.134	41.62	59.3	21.73
489.11	15.07	15.25	488.346	22.46	35.78	19.6	488.323	15.78	16.75	488.33	17.46	29.35	16.25	488.324	19.5	20.74	488.303	41.74	59.66	22.21
490.279	14.35	14.83	489.514	21.77	35.6	19.4	489.492	17.2	16.27	489.499	17.18	27.81	15.78	489.492	20.21	21.8	489.47	41.08	59.21	22.32
491.446	13.93	14.72	490.682	20.86	36.82	19.06	490.658	16.82	17.11	490.669	17.03	28.73	15.83	490.66	20.12	21.48	490.638	41.09	59.77	21.54
492.615	14.67	14.2	491.849	20.95	35.55	18.17	491.826	15.76	16.7	491.837	16.6	27.49	16.19	491.829	19.48	20.98	491.806	38.85	59.66	22.22
493.783	13.63	14.66	493.017	20.56	36.04	18.35	492.994	16.78	17.31	493.009	16.84	27.81	15.98	492.998	18.69	20.37	492.972	42.03	62.78	22.83
494.951	14.12	18.66	494.185	21.65	38.91	18.38	494.163	16.77	16.65	494.179	15.88	27.06	16.15	494.166	18.5	22.51	494.14	41.05	61.45	22.96
496.119	13.94	23.95	495.353	22.58	113.11	18.18	495.332	17.28	15.83	495.347	17.1	27.68	16.29	495.334	18.89	20.89	495.308	41.39	61.62	20.76
497.287	13.46	17.56	496.521	102.04	79.75	20.23	496.498	16.9	16.42	496.513	16.5	27.78	15.81	496.502	18.72	21.13	496.477	40.34	75.99	21.9
498.455	13.51	14.82	497.689	154.03	56.48	19.39	497.666	16.89	16.44	497.681	16.28	29	16.33	497.67	19.58	22.65	497.646	41.95	148.62	21.65
499.623	13.98	15	498.857	94.39	43.81	19.71	498.834	16.51	17.31	498.852	16.75	29.54	16.85	498.838	18.13	22	498.815	42.22	115	21.82
500.79	13.66	14.83	500.026	49.48	36.72	19.73	500.002	16.89	16.37	500.023	16.42	29.18	17.38	500.007	18.99	20.68	499.981	40.43	87.32	21.6
501.957	13.85	14.85	501.195	30.27	34.54	19.53	501.17	17.05	17.05	501.195	16.67	29.51	16.48	501.174	18.92	20.09	501.149	38.96	70.24	24.07
503.125	13.69	15.03	502.363	24.55	34.48	18.93	502.339	15.88	16.81	502.363	16.49	29.78	16.12	502.342	18.43	21.8	502.317	39.53	63.4	22.34
504.293	13.48	14.63	503.531	21.8	75.94	18.44	503.507	16.81	17.43	503.531	16.67	29.31	16.48	503.51	18.75	20.85	503.487	41.72	61.42	21.72
505.461	13.89	15.42	504.699	20.92	84.6	20.68	504.676	16.49	16.96	504.699	17.07	29.29	15.68	504.676	18.22	21.38	504.659	42.52	58.94	21.78
506.629	13.89	14.42	505.868	19.79	54.1	20.55	505.842	17.32	17.36	505.867	16.7	28.94	16.44	505.844	19.13	21.51	505.828	41.56	57.69	21.75
507.795	13.43	15.11	507.036	19.13	40.9	19.99	507.01	16.47	16.35	507.034	16.57	28.59	15.92	507.012	19.35	20.65	506.999	40.71	57.51	22.2
508.963	13.59	14.89	508.203	19.58	37.11	19.97	508.178	17.6	16.98	508.202	16.49	28.02	16.65	508.18	19.86	21.65	508.167	41.13	55.52	21.66
510.129	13.49	14.93	509.372	19.98	34.83	19.33	509.346	17.66	16.42	509.369	17.01	27.3	15.57	509.349	20.06	22.1	509.335	39.72	55.26	20.83
511.296	21.45	15.18	510.538	20.35	34.25	18.94	510.514	16.5	16.46	510.541	15.93	28	16.01	510.516	19.32	22.27	510.507	39.81	58.85	23.29
512.465	22.02	14.82	511.706	20.44	33.93	19.8	511.682	16.52	15.17	511.713	16.74	28.04	16.25	511.684	19.3	21.88	511.675	38.81	60.07	32.71
513.633	17.09	14.59	512.874	21.73	35.03	19.18	512.85	17.51	16.94	512.884	16.58	27.93	17.14	512.852	18.88	22.59	512.847	39.99	59.04	95.44
514.801	15.28	14.64	514.043	23.04	35.26	19.05	514.019	17.05	16.81	514.052	16.3	29.5	16.86	514.021	19.33	21.17	514.015	41.78	57	63.37
515.969	14.27	14.41	515.212	23.04	36.21	22.14	515.187	16.53	15.89	515.22	16.02	27.19	16.45	515.189	19.91	20.24	515.184	41.61	57.72	41.89
517.137	13.6	14.22	516.381	24.99	36.35	24.43	516.355	16.78	15.81	516.388	16.19	27.94	17.14	516.357	19.9	21.55	516.352	40.96	57.41	31.38
518.306	13.52	14.29	517.547	118.77	38.58	22.95	517.524	16.36	16.52	517.558	16.31	27.15	16.93	517.523	21.1	20.22	517.522	40.97	56.85	25.27
519.473	12.98	14.29	518.715	138.93	42.58	22.03	518.69	16.37	16.62	518.729	16.36	27.08	17.04	518.692	19.8	21.14	518.69	42.1	57.53	23.93
520.642	13.95	14.27	519.883	74.52	39.48	21.96	519.858	17.06	15.77	519.897	16.56	27.24	16.38	519.859	19.66	44.31	519.859	41.47	57.28	22.79
521.811	13.97	14.34	521.051	40.19	35.89	21.42	521.026	16.5	16.68	521.069	16.25	27.61	16.65	521.027	20.13	37.63	521.027	40.29	57.78	22.5
522.979	13.71	14.68	522.219	28.03	33.74	22.36	522.195	16.35	16.69	522.237	16.17	28.39	16.9	522.195	19.68	29.39	522.195	40.59	59.05	21.35
524.147	13.11	14.43	523.385	24.35	34.21	22.18	523.364	15.86	16.69	523.405	16.5	28.98	16.81	523.363	20.23	24.36	523.365	41	58.67	20.93
525.315	13.9	14.66	524.555	22.86	112.26	22.45	524.532	17.24	16.89	524.573	16.45	27.5	17.23	524.532	19.55	22.5	524.531	39.49	58.5	21.87
526.483	13.81	14.87	525.724	21.53	83.45	22.17	525.7	16.8	16.1	525.743	16.32	28.32	17.07	525.701	19.58	20.48	525.7	41.06	58.71	20.35
527.651	13.47	14.81	526.893	20.6	54.56	22.19	526.868	16.31	16.42	526.91	16.8	27.68	17.05	526.869	19.64	19.54	526.868	42.04	57.92	19.71
528.819	13.09	15.03	528.061	20.87	41.72	22.02	528.037	16.95	16.16	528.077	15.42	26.32	17.35	528.037	19.52	20.36	528.036	44.1	59.05	20.23
529.988	13.89	14.73	529.229	20.89	36.06	21.29	529.205	15.87	16.77	529.244	15.67	26.79	16.95	529.204	20.18	19.97	529.204	42.22	58.92	19.21
531.157	13.63	14.51	530.397	21.18	34.12	20.36	530.375	16.8	16.09	530.415	16.28	28.89	16.65	530.372	19.16	21.06	530.37	42.61	59.22	20.13
532.325	13.37	14.33	531.565	21.52	33.9	20.46	531.544	16.16	15.58	531.585	16.81	28.04	16.41	531.54	19.36	21.52	531.538	40.99	60.45	19.65
533.493	14.13	23.14	532.734	22.43	35.29	20.17	532.713	16.53	16.96	532.753	15.67	26.58	16.78	532.706	19.42	21.71	532.706	41.56	56.6	19.69
534.661	13.33	22.74	533.902	22.41	32.96	20.56	533.881	16.9	15.89	533.921	16.65	26.67	16.48	533.874	18.93	21.44	533.873	40.68	56.42	19.58
535.829	13.26	17.91	535.071	23.69	33.82	21.09	535.049	16.9	16.6	535.091	16.11	27.41	15.78	535.041	19.91	21.35	535.041	41.77	57.87	18.98
536.997	13.38	16.54	536.24	24.77	33.67	22.16	536.219	16.24	15.9	536.261	15.94	28.51	16.11	536.207	20.95	19.94	536.209	42.78	59.42	18.16
538.164	13.77	15.31	537.408	23.33	33.47	20.4	537.385	15.98	15.68	537.429	15.67	27.71	15.93	537.377	20.75	20.39	537.377	43.16	59.62	18.91
539.33	13.48	14.49	538.576	23.7	38.48	19.9	538.554	16.57	16.33	538.598	15.79	27.74	15.8	538.545	19.99	21.3	538.545	41.7	58.99	18.85
540.499	14.13	15.29	539.744	23.79	37.2	20.19	539.722	17.17	16.91	539.767	16.22	27.78	15.55	539.713	19.96	26.12	539.712	42.84	59.73	19.41
541.667	14.36	14.7	540.912	23.46	34.8	20.49	540.888	16.61	15.87	540.933	16.51	28.28	15.05	540.883	20.29	45.8	540.881	42.31	59.34	19.66
542.835	13.6	15.26	542.078	23.06	34.87	21.23	542.056	16.65	16.37	542.105	16.13	29.2	15.59	542.051	19.53	34.97	542.049	41.63	59.41	19.51
544.003	22.47	14.27	543.247	21.22	33.48	20.6	543.224	16.78	15.98	543.275	15.97	27.45	15.21	543.22	20.09	26.76	543.217	42.34	59.03	19.85
545.171	21.62	14.4	544.416	22.3	35.67	49.09	544.392	16.32	16.09	544.445	16.04	27.18	15.36	544.387	19.92	22.71	544.385	43.39	58.92	20.84
546.339	17	14.51	545.585	22.47	39.72	88.75	545.56	16.25	16.37	545.613	16.17	27.21	15.75	545.557	19.14	21.6	545.553	42.86	58.65	19.66
547.506	15.37	14.62	546.753	21.9	38.39	58.4	546.729	16.02	16.92	546.782	15.69	27.29	14.99	546.726	19.38	20.67	546.719	43.86	59.29	24.5
548.675	14.55	14.95	547.921	21.93	37.19	36.95	547.897	17.04	16.35	547.949	16.34	28.17	14.34	547.894	19.88	19.92	547.889	42.97	61.49	22.59
549.844	13.77	19.85	549.089	23.05	48.44	29.19	549.064	17.16	16.29	549.117	16.4	27.4	15.11	549.062	20.38	20.06	549.057	40.32	61.95	20.52
551.012	13.15	23.59	550.257	24.07	114.35	25.48	550.232	16.94	15.92	550.285	15.49	26.72	14.69	550.23	20.79	20.13	550.224	40.3	60.18	20.32
552.18	13.54	17.48	551.425	24.36	80.57	21.84	551.402	17.26	16.02	551.453	15.82	27.37	14.93	551.398	20.29	19.95	551.393	43.55	63.17	21.88
553.349	13.93	15.64	552.594	22.72	53.44	20.51	552.57	16.29	16	552.621	15.4	28.38	15.52	552.566	19.83	20.07	552.559	44.57	61.01	21.26
554.517	13.75	15	553.763	21.98	42.06	19.59	553.736	16.41	16.49	553.791	16.18	28.53	14.92	553.735	20.18	20.27	553.727	44.37	61.92	19.81
555.685	14.1	14.89	554.929	21.92	36.39	19.45	554.904	16.35	16.26	554.959	16.2	28.63	15.81	554.904	19.79	22.79	554.893	44.35	58.9	20.87
556.853	13.48	14.35	556.098	21.22	34.44	19.06	556.073	16.67	16.39	556.13	15.8	29.61	14.81	556.072	21.08	22.63	556.059	43.49	58.51	20.15
558.022	13.38	14.68	557.266	22.08	33.64	19.46	557.242	16.32	17.1	557.297	16.35	27.86	15.4	557.24	41.59	20.6	557.227	41.21	59.7	21.06
559.19	13.6	14.57	558.434	21.52	32.99	19.92	558.408	16.94	16.17	558.467	16.43	27.85	15.12	558.406	47.46	21.27	558.396	41.27	61.97	20.77
560.358	13.69	14.39	559.602	22.53	33.91	19.9	559.576	16.62	16.2	559.637	15.54	27.32	15.46	559.574	34.91	21.88	559.565	41.56	61.99	22.39
561.526	14.17	15	560.77	22.97	34.44	20.1	560.744	16.34	15.7	560.805	15.76	28.07	15.31	560.742	26.58	19.99	560.734	42.22	62.47	21.58
562.693	13.89	14	561.935	24.07	37.5	19.31	561.912	16.34	16.39	561.975	15.87	28.23	15.71	561.911	23.21	20.93	561.9	42.07	61.03	21.17
563.861	13.22	14.69	563.104	24.73	35.37	20.1	563.08	16.25	16.04	563.143	15.58	27.44	15.93	563.077	21.17	21.24	563.068	42.06	64.35	21.51
565.029	13.84	15.08	564.271	23.64	39.63	21.27	564.248	15.87	15.84	564.312	15.56	27.52	15.77	564.246	18.99	20.71	564.236	40.89	61.1	21.03
566.197	13.63	15.21	565.439	22.42	40.98	20.2	565.416	16.85	15.31	565.48	15.97	27.75	16.28	565.415	19.67	20.75	565.404	41.16	61.79	21.72
567.366	13.7	15.48	566.607	21.95	37.15	18.97	566.585	16.36	16.07	566.648	15.93	27.33	16.3	566.583	19.15	22.3	566.572	42.38	61.49	23.33
568.534	13.44	14.63	567.775	22.28	38.69	18.58	567.754	16.96	16.31	567.816	16.9	27.74	16.31	567.751	18.7	21.62	567.741	42.56	62.36	23.88
569.702	13.79	14.61	568.943	22.36	85.37	19.51	568.923	16.95	15.61	568.986	15.66	27.08	16.32	568.919	18.57	22.27	568.909	41.74	66.82	21.69
570.87	13.56	14.49	570.111	23.83	100.56	19.97	570.091	16.26	15.97	570.154	15.67	27.08	16	570.087	19.08	37.52	570.078	45.64	62.42	22.5
572.038	13.98	14.3	571.279	168.76	68.18	22.89	571.259	16.02	16.2	571.324	15.72	26.09	15.81	571.255	19.19	43.05	571.245	43.53	61.26	23.1
573.205	13.99	14.25	572.449	116.2	47.7	23.8	572.427	15.94	16.46	572.497	15.57	26.24	15.42	572.423	19.22	33.61	572.413	42.33	59.08	24.19
574.373	13.59	14.75	573.618	62.75	40.38	22.6	573.595	16.62	16.45	573.666	15.88	26.67	16.55	573.592	19.34	28.15	573.581	41.26	60.51	21.99
575.54	13.45	14.52	574.786	36.46	36.09	20.98	574.763	16.6	17	574.836	15.41	27.56	15.99	574.761	18.94	24.64	574.749	41.01	59.54	22.99
576.709	13.3	14.92	575.954	28.63	37.04	20.76	575.932	17.15	16.32	576.004	15.19	26.6	15.16	575.929	19.93	22.07	575.917	41.5	60.03	22.76
577.877	13.48	14.24	577.12	23.29	36.83	20.56	577.101	16.9	17.32	577.17	15.97	27.3	16.21	577.097	20.12	20.71	577.085	40.88	58.93	22.98
579.043	13.61	19.89	578.29	21.7	35.71	25.18	578.267	16.84	15.78	578.342	16.67	25.61	15.55	578.265	19.78	19.89	578.254	41.96	60.73	22.04
580.211	13.93	24.16	579.458	21.46	36.05	97.24	579.435	18.09	16.04	579.512	15.53	26.15	15.39	579.433	19.8	20.61	579.423	41.67	59.89	20.99
581.378	13.34	17.98	580.626	21.19	34.67	63.75	580.603	16.89	16.25	580.686	15.29	25.9	16.12	580.601	19.59	20.36	580.593	42.51	61.88	22.12
582.546	13.97	15.78	581.795	21.17	36.25	38.04	581.771	16.15	16.43	581.854	15.38	26.96	16.11	581.769	20.18	20.11	581.761	42.59	60.66	22.1
583.715	13.68	15.44	582.964	20.73	34.01	27.6	582.939	17.16	15.51	583.022	15.72	26.21	15.63	582.938	20.04	20.6	582.929	42.39	59.79	22.39
584.883	14.01	14.42	584.132	21.39	40.28	23.25	584.106	16.65	15.79	584.192	15.84	25.39	15.64	584.106	19.42	20.25	584.097	44.22	59.13	22.5
586.051	13.22	14.76	585.3	22.79	109.6	22.2	585.275	16.93	15.99	585.362	15.62	25.75	15.72	585.274	20.6	19.64	585.265	44.55	60.13	22.58
587.219	13.42	14.68	586.469	22.61	75.27	20.63	586.444	16.86	16.28	586.532	15.85	24.91	15.12	586.44	21.01	20.74	586.433	41.43	60.97	23.17
588.387	13.13	14.6	587.638	22.24	52.47	20.46	587.612	16.91	16.17	587.7	16.15	26.82	15.38	587.608	20.82	20.99	587.602	42.83	64.34	22.11
589.555	13.68	14.28	588.806	22.02	40.18	20.46	588.78	15.74	15.37	588.868	15.35	26.81	15.45	588.778	20.36	22.15	588.771	42.67	60.92	22.49
590.723	13.63	14.31	589.974	23.94	38.21	19.78	589.948	16.12	16.21	590.036	15.97	25.23	15.5	589.946	20.61	20.84	589.939	40.98	61.82	23.26
591.89	20.04	14.7	591.142	24.41	35.86	19.7	591.116	16.86	16.07	591.205	16.06	26.29	15.96	591.115	20.91	20.64	591.107	42.38	60.95	23.48
593.058	22.56	13.47	592.308	25	35.67	20.57	592.284	15.86	16.58	592.373	16.26	26.62	16.26	592.284	20.18	21.41	592.273	41.76	60.82	25.88
594.225	18.25	14.55	593.476	23.19	36.04	20.41	593.452	15.95	16.25	593.543	16.18	26.93	15.6	593.452	20.06	35.34	593.441	40.83	60.74	25.36
595.393	15.2	14.31	594.642	23.64	35.32	22.02	594.621	16.91	16.08	594.713	16.43	26.92	15.91	594.624	19.83	41.93	594.609	42.89	60.8	24.16
596.561	15.2	14.46	595.81	24.79	36.4	20.23	595.79	16.51	16.01	595.881	15.43	27.42	15.1	595.79	21.57	31.45	595.777	43.25	63.26	22.33
597.729	13.83	13.34	596.979	26.44	34.56	20.2	596.958	17.47	15.29	597.049	16	26.68	15.56	596.958	21.75	24.83	596.945	43.54	61.55	23
598.897	13.72	13.82	598.147	24.8	38.94	20.43	598.126	16.64	16.04	598.215	15.95	26.98	15.65	598.124	20.65	23.15	598.114	44.3	61.93	23.11
600.065	13.39	14.29	599.315	23.29	45.37	20.33	599.292	16.38	16.19	599.386	16.52	26.39	15.49	599.293	21.15	20.89	599.282	42.55	62.82	22.24

## Sheet: Fig7C-timelapse
Ctrl		Nife1uM		Nife washout
Time	#1 (EGFP)	Time	#1 (EGFP)	Time	#1 (EGFP)
0	144.53	0	78.71	0	211.37
1.243	126.38	1.244	87.85	1.242	184.9
2.411	98.08	2.413	91.81	2.41	208.13
3.58	131.81	3.581	103.31	3.578	217.93
4.748	102.12	4.748	120.93	4.744	261.28
5.916	96.92	5.916	110.97	5.913	334.45
7.084	91.31	7.084	110.54	7.081	330.24
8.253	91.67	8.252	119.19	8.25	280.55
9.422	162.07	9.418	113.98	9.419	320.14
10.59	143.68	10.584	117.84	10.587	259.37
11.759	137.44	11.753	98.69	11.755	267.43
12.927	150.72	12.919	96.13	12.923	260.05
14.095	893	14.088	125.06	14.09	251.87
15.263	756.81	15.256	108.07	15.258	271.29
16.431	501.02	16.424	88.58	16.424	281.88
17.598	295.23	17.592	115.36	17.593	276.95
18.764	199.21	18.76	90.27	18.761	372.52
19.934	103.08	19.926	109.07	19.929	343.03
21.102	95.87	21.094	115.67	21.097	279.78
22.27	98.79	22.263	93.08	22.265	317.71
23.438	116.36	23.431	108.68	23.434	339.4
24.606	535.1	24.599	92.15	24.602	282.29
25.774	762.1	25.767	98.42	25.77	324.44
26.942	516.46	26.935	114.09	26.939	235.97
28.11	324.04	28.103	110.53	28.108	244.81
29.279	216.93	29.27	144.38	29.276	257.32
30.447	126.03	30.44	94.68	30.444	234.62
31.615	115.52	31.609	107.15	31.612	299.7
32.783	133.39	32.778	82.69	32.779	269.67
33.951	121.81	33.946	99.72	33.948	248.54
35.12	861.85	35.112	103.89	35.116	254.45
36.289	651.44	36.28	76	36.285	269.34
37.456	430.84	37.448	91.26	37.453	680.61
38.625	246.03	38.614	93.81	38.621	652.88
39.791	186.93	39.783	113.09	39.789	609.29
40.958	124.78	40.952	93.97	40.957	358.21
42.126	113.64	42.119	103.45	42.123	228.9
43.294	93.72	43.287	127.2	43.292	161.2
44.462	94.36	44.453	92.63	44.46	144.61
45.629	120.94	45.621	87.71	45.628	132.49
46.798	88.06	46.789	99.67	46.796	134.77
47.967	101.79	47.957	96.21	47.964	124.76
49.134	105.72	49.126	135.69	49.132	105.93
50.302	118.78	50.295	91.37	50.3	158.43
51.472	112.3	51.463	91.18	51.468	144.08
52.64	945.29	52.631	94.55	52.637	166.5
53.808	686.45	53.801	95.78	53.806	175.08
54.974	399.73	54.969	106.48	54.974	135.29
56.143	214.36	56.139	102.43	56.142	164
57.311	143.89	57.307	90.67	57.308	152.94
58.479	102.51	58.476	132.88	58.476	191.13
59.647	106.15	59.645	88.91	59.642	166.26
60.815	114.86	60.813	86.65	60.81	146.39
61.983	106.95	61.981	133.33	61.979	167.29
63.153	124.77	63.147	95.59	63.146	157.04
64.321	106.67	64.315	104.01	64.316	248.82
65.487	99.08	65.483	139.08	65.483	320.54
66.656	118.75	66.651	78.06	66.652	324.85
67.824	154.9	67.819	124.78	67.82	200.07
68.992	135.5	68.985	96.26	68.988	199.75
70.16	124.51	70.151	105.53	70.156	218.55
71.328	146.95	71.321	96.47	71.324	247.73
72.496	138.06	72.487	131.35	72.49	273.45
73.664	155.51	73.655	93.05	73.659	206.24
74.831	151.82	74.823	120.34	74.827	926.56
76.002	116.55	75.991	122.98	75.995	584.88
77.17	149.1	77.159	92.78	77.163	710.45
78.338	138.53	78.327	117.42	78.331	484.5
79.507	963.33	79.495	90.2	79.497	269.78
80.674	759.61	80.663	94.6	80.666	191.02
81.842	521.79	81.829	102.33	81.835	148.34
83.009	303.38	82.997	100.47	83.003	148.53
84.178	165.68	84.165	113.23	84.171	135.16
85.346	96.44	85.333	107.81	85.339	177.75
86.512	112.12	86.502	95.37	86.507	113.01
87.678	107.63	87.67	111.08	87.675	145.87
88.846	100.78	88.838	94.82	88.843	157.19
90.014	129.98	90.006	100.24	90.012	135.63
91.182	114.31	91.174	90.02	91.178	169.18
92.35	124.14	92.342	109.82	92.346	196.91
93.518	135.82	93.511	107.12	93.514	204.84
94.686	154.15	94.679	117.86	94.682	281.99
95.854	120.16	95.847	112.69	95.85	294.55
97.022	140.19	97.013	112.88	97.018	284.39
98.192	141.28	98.181	73.19	98.186	232.27
99.361	140.45	99.349	91.38	99.355	177.03
100.531	148.11	100.515	99.73	100.522	148.98
101.698	108.77	101.684	104.76	101.69	140.03
102.867	138.38	102.85	105.93	102.858	151.03
104.035	160.53	104.019	116.26	104.026	177.44
105.203	151.27	105.187	110.74	105.194	208.16
106.371	131.68	106.355	107.81	106.362	246.5
107.539	134.26	107.523	103.44	107.53	333.18
108.705	131.19	108.691	93.89	108.699	338.74
109.873	150.28	109.859	102.62	109.867	268.13
111.041	129.82	111.027	88.46	111.035	322.66
112.209	137.43	112.196	97.18	112.203	255.3
113.377	150.32	113.365	118.66	113.371	285.42
114.545	152.45	114.534	109.38	114.54	293.82
115.713	157.33	115.702	96.85	115.71	280.13
116.883	179.02	116.87	110.33	116.878	295.51
118.052	183.28	118.038	105.91	118.048	299.68
119.221	135.28	119.206	127.57	119.216	267.79
120.39	157.51	120.375	90.45	120.384	331.71
121.558	182.11	121.544	102.46	121.552	301.3
122.726	125.81	122.713	150.4	122.72	299.78
123.892	161.29	123.881	92.51	123.888	331.3
125.06	174.78	125.049	101.92	125.058	268.09
126.23	794.74	126.217	131.67	126.227	310.61
127.396	725.27	127.385	100.54	127.396	301.82
128.565	546.03	128.551	130.23	128.562	279.24
129.731	318.6	129.719	75.95	129.73	278.53
130.897	158.29	130.888	135.32	130.898	317.25
132.065	128.36	132.055	108.35	132.066	297.8
133.233	133.43	133.223	134.54	133.235	332.22
134.401	112.93	134.391	81.34	134.404	308.76
135.57	95.07	135.559	96.57	135.57	224.35
136.736	97.47	136.727	142.11	136.738	237.12
137.905	120.98	137.895	110.33	137.904	294.49
139.074	92.97	139.064	135.01	139.07	225.01
140.242	126.81	140.233	99.68	140.238	266.51
141.41	100.62	141.402	100.08	141.404	267.87
142.578	139.09	142.57	86.07	142.573	285.89
143.746	958.03	143.737	109.42	143.742	266.13
144.914	675.98	144.906	104.59	144.908	283.39
146.081	442.73	146.074	102.88	146.076	306.45
147.25	224.42	147.242	84.85	147.244	272.91
148.419	117.87	148.41	96.76	148.412	294.72
149.587	127.07	149.579	130.11	149.58	267.86
150.755	124.21	150.748	90.62	150.748	219.29
151.923	91.6	151.916	75.89	151.916	237.1
153.091	110.15	153.084	144.67	153.085	201.82
154.259	112.09	154.252	83.85	154.254	227.32
155.426	100.02	155.422	107.71	155.422	261.29
156.596	109.32	156.59	80.77	156.59	222.41
157.762	101.72	157.76	101.12	157.758	240.12
158.928	160.88	158.929	91.76	158.926	256.1
160.097	140.78	160.097	117.34	160.094	287.18
161.265	116.29	161.265	132.6	161.262	258.48
162.433	145.13	162.433	100.91	162.429	179.36
163.601	169.79	163.601	126.87	163.598	189.53
164.77	231.12	164.77	106.4	164.766	126.63
165.939	194.52	165.938	118.39	165.934	178.04
167.107	178.84	167.106	107.84	167.1	164.77
168.275	165.88	168.274	117.98	168.27	214.39
169.443	823.28	169.443	99.98	169.438	245.39
170.61	730.9	170.611	113.11	170.606	300.94
171.778	485.43	171.781	101.13	171.775	356.89
172.946	249.59	172.949	92.49	172.942	297.72
174.114	104.99	174.117	84.73	174.11	249.23
175.283	79.36	175.284	59.18	175.276	300.66
176.451	110.84	176.452	89.99	176.444	280.52
177.619	94.09	177.62	91.51	177.612	260.66
178.787	101.55	178.788	93.61	178.781	288.53
179.956	119.83	179.956	91.75	179.95	228.95
181.125	171.06	181.124	140.19	181.117	230.82
182.293	773.69	182.29	111.79	182.285	245.59
183.461	537.56	183.459	86.38	183.453	277.45
184.629	286.36	184.626	66.63	184.621	237.33
185.797	156.8	185.795	92.75	185.789	256.96
186.965	124.77	186.963	123.28	186.957	261.31
188.133	100.13	188.131	132.76	188.125	244.35
189.299	79.42	189.299	101.21	189.293	294.99
190.468	104.41	190.467	117.32	190.459	264.24
191.637	115.14	191.633	107.24	191.627	260.98
192.804	145.97	192.801	97.36	192.795	253.27
193.972	145.88	193.968	86.21	193.963	276.95
195.14	135.62	195.137	91.05	195.131	254.28
196.308	146.81	196.305	112.48	196.3	295.95
197.476	145.47	197.473	91.23	197.468	246.03
198.642	160.68	198.641	119.07	198.637	259.37
199.811	151.85	199.809	107.25	199.804	305.58
200.98	179.7	200.977	107.31	200.972	242.16
202.147	134.68	202.145	110.18	202.14	248.33
203.315	119.63	203.311	110.79	203.308	271.85
204.483	115.19	204.48	103.33	204.477	242.27
205.651	141.82	205.646	77.99	205.646	220.51
206.821	305.41	206.814	128.49	206.814	221.76
207.99	843.77	207.982	89.24	207.982	254.91
209.159	558.81	209.15	62.02	209.151	291.31
210.327	295.74	210.318	108.06	210.319	251.18
211.494	170.94	211.487	129.18	211.487	259.63
212.662	117.39	212.656	84.63	212.655	214.52
213.83	85.03	213.825	106.67	213.823	253.56
214.999	83.67	214.993	85.52	214.992	231.63
216.169	97.93	216.161	99.39	216.161	250.43
217.337	87.42	217.329	81.51	217.331	246.3
218.506	84.92	218.497	95.25	218.499	270.58
219.674	80.74	219.665	104.01	219.667	226.56
220.841	143.53	220.833	153.29	220.835	296.88
222.009	201.92	222.002	105.97	222.003	279.63
223.177	114.03	223.17	120.15	223.171	264.12
224.345	140.27	224.338	121.98	224.34	256.88
225.513	900.26	225.507	127.56	225.506	278.22
226.681	625.52	226.677	92.71	226.674	265.02
227.85	380.14	227.845	79.77	227.842	274.13
229.019	222.07	229.014	86.35	229.01	225.87
230.188	123.06	230.183	97.72	230.178	261.66
231.356	105.63	231.352	114.29	231.346	164.78
232.524	105.12	232.52	117.31	232.514	189.55
233.692	120.26	233.688	143.86	233.683	199.24
234.86	115.13	234.853	92.67	234.85	138.71
236.026	105.31	236.022	130.09	236.018	174.32
237.194	130.18	237.19	113.68	237.186	212.92
238.363	132.09	238.358	91.02	238.354	199.07
239.531	193.74	239.527	97.71	239.522	246.86
240.699	173.99	240.695	115.76	240.69	207.41
241.867	126.88	241.863	112.79	241.858	241.5
243.035	128.57	243.031	109.29	243.026	265.63
244.203	113.04	244.199	134.07	244.195	235.96
245.369	126.24	245.368	104	245.364	208.66
246.538	135.82	246.536	94.93	246.532	247.98
247.706	123.91	247.704	72.17	247.698	272.66
248.874	160.72	248.872	108.29	248.866	237.5
250.042	870.06	250.04	104.94	250.034	253.54
251.21	663.58	251.208	98.56	251.2	256.79
252.376	447.85	252.376	127.22	252.369	254.57
253.544	258.68	253.544	112.11	253.535	232.65
254.712	140.72	254.713	118.96	254.704	277.89
255.88	110.03	255.879	80.8	255.87	253.52
257.049	88.04	257.047	98.84	257.038	235.67
258.217	99	258.215	84.62	258.206	222.55
259.385	105.84	259.383	93.35	259.374	235.89
260.553	128.8	260.551	117.73	260.542	313.32
261.719	97.29	261.719	72.08	261.71	328.97
262.887	96.11	262.887	90.12	262.877	259.08
264.055	115.37	264.055	75.47	264.045	209.08
265.224	120.81	265.221	121.23	265.213	223.53
266.392	966.41	266.39	114.77	266.381	199.29
267.56	628.27	267.558	63.84	267.549	253.98
268.728	342.85	268.724	109.42	268.715	260.45
269.896	207.42	269.892	102.48	269.883	261.92
271.065	119.88	271.062	94.14	271.052	237.32
272.234	103.12	272.23	125.01	272.221	227.03
273.402	99.64	273.399	98.96	273.389	227.48
274.569	115.63	274.568	107.46	274.557	258.3
275.738	239.19	275.737	99.46	275.724	244.23
276.906	712.26	276.906	107.69	276.893	273.46
278.074	451.68	278.074	117.72	278.061	267.36
279.242	229.07	279.242	129.34	279.229	240.68
280.408	107.05	280.412	99.83	280.397	259.54
281.577	106.3	281.58	119.87	281.563	233.1
282.744	136.72	282.748	113.26	282.731	273.88
283.913	84.39	283.914	105.89	283.899	278.69
285.081	89.67	285.083	82.21	285.067	318.15
286.249	82.79	286.252	117.37	286.236	265.7
287.417	105.52	287.421	96.12	287.402	279.21
288.585	809.09	288.589	94.53	288.57	911.46
289.754	760.8	289.757	90.03	289.738	569.82
290.923	501.68	290.923	89.55	290.906	737.38
292.09	288.57	292.091	86.48	292.074	496.5
293.259	151.34	293.257	95.59	293.242	303.34
294.427	93.58	294.423	110.01	294.41	170.28
295.595	97.49	295.592	100.21	295.578	151.97
296.763	81.72	296.759	85.85	296.747	154.97
297.931	96.11	297.927	112.19	297.916	153.34
299.099	105.99	299.095	111.48	299.084	91.08
