# Supplementary material for: The gut contractile organoid for studying the gut motility regulated by coordinating signals between interstitial cells of Cajal and smooth muscles
Source: eLife. 2025 Aug 22;13:RP97860. doi: 10.7554/eLife.97860 (PMC12373395; doi:10.7554/eLife.97860)
Supplement: Figure 8—source data 1. [file elife-97860-fig8-data1.xlsx]

## Sheet: Fig8BC
Before			After			Before			After			Before			After
Time[s]	#1 (Top)	#2 (Bottom)	Time[s]	#1 (Top)	#2 (Bottom)	Time[s]	#1 (top)	#2 (bottom)	Time[s]	#1 (top)	#2 (bottom)	Time[s]	#1 (EGFP)	#2 (EGFP)	Time[s]	#1 (EGFP)	#2 (EGFP)
0.064	134.96	154.24	0.065	324.79	177.67	0.066	175.79	228.13	0.065	119.63	150.2	0	455.25	759.36	0.065	421.88	316.19
1.244	133.17	154.73	1.247	325.76	178.5	1.242	171.94	227.11	1.242	121.89	151.85	0.628	447.08	733.57	0.693	417.84	311.42
2.413	134.87	150.71	2.414	318.82	178.2	2.41	174.51	227.91	2.409	119.3	149.49	1.247	442.91	699.18	1.314	415.86	309.68
3.58	132.52	155.07	3.582	321.33	176.4	3.579	179.28	227.26	3.577	120.33	151.24	1.868	437.41	653.23	1.934	412.59	306.57
4.749	132.5	152.96	4.75	322.68	180.93	4.748	181.41	225.99	4.745	125.8	167.75	2.486	430.46	603.77	2.553	410.8	303.77
5.917	132.76	156.74	5.918	325.8	179.91	5.915	192.74	221.25	5.913	130.21	174.94	3.106	424.03	560.54	3.172	411.63	302.96
7.085	133.89	155.24	7.086	327.41	182.85	7.084	197.95	224.45	7.081	127.48	175.2	3.727	419.33	524.37	3.79	410.37	302.49
8.253	132.34	152.61	8.254	323.95	181.61	8.252	199.51	222.96	8.248	127.82	173.7	4.347	421.01	495	4.41	409.39	301.65
9.419	135.3	151.95	9.42	325.94	177.71	9.42	203.7	220.72	9.417	123.51	160.86	4.967	508.04	481.05	5.03	408.66	300.53
10.587	140.66	152.96	10.588	593.39	256.05	10.588	205.01	220.67	10.586	122.42	156.49	5.587	619.19	464.9	5.647	406.39	298.84
11.755	136.84	157.45	11.755	902.98	301.43	11.756	207.04	218.98	11.754	120.07	150.65	6.207	656.25	448.37	6.266	404.84	296.79
12.922	137.15	155.26	12.922	896.04	314.37	12.924	205.51	217.2	12.922	118.96	151.88	6.827	647.44	433.99	6.884	404.2	295.42
14.094	136.36	155.99	14.09	809.85	297.27	14.092	209.18	216.09	14.091	119.57	147.68	7.447	617	429.57	7.504	402.49	294.11
15.261	137.07	156.19	15.258	804.22	295.88	15.259	204.24	215.71	15.259	119.16	150.07	8.068	595.85	424.35	8.125	401.59	293.18
16.429	138.12	155.7	16.426	534.43	243.81	16.428	203.27	213.33	16.427	118.88	147.71	8.688	577.74	417.61	8.745	400.69	290.58
17.602	134.72	150.16	17.594	411.15	208.31	17.596	204.74	211.08	17.595	119.24	149.21	9.308	556.26	432.3	9.365	400.5	289.14
18.772	137.37	152.28	18.762	371.77	196.12	18.764	203.53	209.94	18.764	119.76	149.68	9.928	530.3	435.26	9.985	400.17	290.13
19.942	133.38	152.7	19.93	353.51	182.92	19.936	204.13	208.97	19.933	121.18	150.48	10.549	510.01	428.3	10.602	401.2	289.85
21.112	134.77	154.27	21.097	349.21	178.51	21.106	201.81	208.38	21.101	120.24	150.23	11.169	494.08	632.02	11.221	399.53	289.6
22.285	135.19	153.08	22.263	342.69	173.31	22.278	199.17	205.93	22.271	120.15	149.57	11.79	478.29	744.85	11.841	400.25	287.99
23.456	134.2	154.21	23.432	339	174.84	23.45	197.63	207.25	23.439	120.86	149.81	12.412	465.54	745.54	12.461	400.81	287.88
24.624	137.82	152.41	24.6	344.17	175.56	24.617	196.13	204.67	24.607	120.74	152.61	13.037	453.64	708.85	13.079	456.4	340.05
25.792	137.46	151.38	25.768	342.19	170.23	25.788	192.5	200.63	25.775	120.24	149.12	13.661	443.6	652.58	13.698	585.25	548.17
26.963	135.96	153.26	26.936	338.53	168.54	26.96	188.01	202.98	26.943	120.39	151.62	14.281	436.1	608.68	14.315	653.41	655.04
28.131	136.49	151.65	28.104	337.08	170.68	28.13	186.39	201.07	28.111	121.85	152.46	14.901	432.67	572.72	14.933	685.47	708.57
29.299	135.18	151.95	29.273	335.52	165.71	29.298	182.5	200.9	29.28	117.91	150.59	15.521	430.05	532.38	15.554	696.94	733.64
30.467	135.06	152.04	30.44	333.02	171.66	30.466	180.95	199.86	30.448	127.57	170.28	16.142	426.32	498.37	16.173	691.26	738.73
31.635	185	150.69	31.609	332.96	169.12	31.634	178.81	200.93	31.616	128.3	171.16	16.762	424.8	472.27	16.793	671.28	712.42
32.803	234.3	152.95	32.778	335.48	171.72	32.803	176.49	199.5	32.784	130.57	172.32	17.383	423.05	451.19	17.41	640.62	667.28
33.975	228.38	151.3	33.946	333.17	168.58	33.974	173.95	194.73	33.951	128.98	169.72	18.004	418.01	431.25	18.029	609.86	621.92
35.145	195.18	151.58	35.112	330.8	170.73	35.145	171.43	196.99	35.119	124.35	162.7	18.623	417.82	416.8	18.649	585.75	580.45
36.315	196.82	151.37	36.28	335.45	172.71	36.315	173.26	197.07	36.287	121.16	156.75	19.243	421.17	407.76	19.267	562.82	545.4
37.483	148.92	151.59	37.448	328.68	171.51	37.483	171.13	193.76	37.456	118.9	152	19.863	417.93	395.29	19.887	546.39	511.55
38.653	138.16	151.19	38.616	329.22	170.63	38.651	171.08	192.87	38.625	117.25	148.25	20.481	411.4	387.15	20.507	526.7	481.08
39.82	133.79	152.71	39.784	330.28	173.1	39.823	170.44	195.48	39.793	118.42	146.69	21.102	408.61	388.71	21.127	510.77	453.62
40.991	134.59	151.93	40.952	329.32	173.77	40.991	172.66	194.55	40.961	118.18	147.51	21.723	407.91	382.36	21.747	497.45	427.72
42.157	131.61	151.09	42.121	328.13	172.37	42.162	170.93	193.78	42.129	118.51	150.72	22.344	410.63	378.23	22.366	484.82	409.79
43.325	134.35	151.84	43.289	332.1	174.69	43.333	173.7	193.78	43.297	119.87	148.52	22.965	409.74	370.01	22.985	475.31	392.61
44.495	135.7	150.25	44.457	325.78	175.14	44.504	172.55	192.91	44.465	117.8	151.05	23.585	409.02	363.91	23.605	465.19	379.56
45.665	134.1	151.65	45.625	323.5	176.05	45.672	172.81	193.19	45.633	118.97	151.03	24.205	410.74	358.86	24.225	455.97	367.55
46.836	131.93	152.04	46.792	330.76	173.24	46.84	172.51	190.85	46.801	119.46	150.89	24.825	414.42	354.95	24.844	451.62	355.8
48.004	134.36	151.03	47.96	327.24	174.98	48.007	172.83	193.95	47.969	120.15	152.28	25.446	413.47	351.85	25.464	444.83	347.78
49.174	133.96	150.37	49.127	329.96	174.91	49.175	173.35	193.03	49.137	125.29	169.69	26.063	409.03	354.44	26.083	438.52	340.48
50.342	138.37	149.21	50.295	329.13	174.21	50.343	171.48	194.7	50.305	130.67	172.26	26.684	403.8	355.9	26.702	435.41	332.84
51.51	132.34	149.48	51.463	326.75	176.89	51.511	173.24	194.28	51.473	130.35	171.43	27.305	401.47	356.62	27.322	429.45	327.61
52.678	133.48	149.63	52.631	329.37	176.61	52.68	181.87	196.95	52.64	130.12	171.16	27.922	401.5	372.38	27.941	425.37	322.32
53.85	134.59	147.91	53.799	332.78	177.05	53.848	187.52	196.43	53.809	124.71	164.47	28.543	483.03	373.85	28.561	422.23	317.88
55.018	134.16	148.89	54.967	331.61	174.88	55.016	191.92	196.83	54.977	120.82	153.96	29.162	607.98	367.61	29.181	419.14	314.23
56.186	134.82	150.3	56.135	329.43	172.91	56.184	200.05	198.93	56.145	119.47	150.1	29.783	655.95	566.95	29.801	417.77	311.23
57.355	134.98	150.73	57.303	328.13	172.29	57.351	203.09	213.45	57.317	118.96	148.45	30.404	661.11	736.74	30.42	414.33	307.25
58.523	134.53	151.48	58.47	327	175.91	58.519	202.51	220.44	58.485	118.18	148.14	31.025	636.45	776.3	31.04	411.44	304.94
59.691	136.43	151.98	59.639	324.49	174	59.687	205.64	225.84	59.653	118.13	146.92	31.646	605.85	787.37	31.661	410.86	302.96
60.861	136.74	150.45	60.807	325.91	177.08	60.855	206.01	231	60.821	119.42	147.3	32.267	583.75	747.05	32.281	410.22	301.11
62.029	138.33	150.15	61.975	329.6	175.75	62.024	207.44	227.49	61.988	119	146.3	32.888	558.78	734.98	32.899	407.3	297.95
63.196	135.88	152.26	63.143	326.81	174.25	63.192	205.51	225.47	63.157	118.47	146.33	33.508	536.25	718.04	33.519	406.77	297.03
64.367	138.23	149.69	64.309	326.07	175.37	64.36	205.6	227.07	64.325	118.35	147.68	34.128	516.06	672.31	34.137	406.97	296.15
65.54	135.96	150.79	65.477	328.98	178.73	65.528	203.79	226.38	65.494	116.71	147.36	34.746	496.95	745.56	34.757	405.14	295.63
66.713	133.94	150.24	66.645	326.47	176.25	66.695	200.92	226.27	66.662	117.35	147.93	35.366	479.79	834.12	35.375	403.33	294.43
67.883	134.16	152.11	67.811	332.67	177.4	67.864	202.88	227	67.83	116.49	147.13	35.987	465.34	803.71	35.994	402.54	293.81
69.051	135.02	150.97	68.98	329.72	176.71	69.032	196.84	225.61	68.998	117.45	147.06	36.607	458.36	746.74	36.614	403.49	292.88
70.221	136.84	150.19	70.148	329.81	177.84	70.2	195.5	225.39	70.166	117.03	148.06	37.225	461.24	723.11	37.233	403.17	292.57
71.389	136.86	149.66	71.316	332.54	176.22	71.369	193.89	225.1	71.333	120.14	148.04	37.847	466.41	678.25	37.852	401.6	291.16
72.557	132.77	150.04	72.484	336.49	174.71	72.537	191.44	225.25	72.502	117.99	148.39	38.469	461.16	634.76	38.472	399.97	289.45
73.725	136.03	150.97	73.652	337.83	176.17	73.705	188.4	223.96	73.669	118.84	151.39	39.091	451.36	599.35	39.091	401.42	290.7
74.892	137.34	152.52	74.82	333.2	176.2	74.873	185.16	226.62	74.837	117.94	149.82	39.71	440.65	567.07	39.711	401.61	288.37
76.061	136.89	150.37	75.988	332.18	179.59	76.04	179.91	224.55	76.005	117.36	152.48	40.332	431.41	533.42	40.331	402.11	290.85
77.228	138.42	150.93	77.156	328.96	176.24	77.209	179.21	222.92	77.173	123.81	168.08	40.953	424.34	504.64	40.95	399.7	289.5
78.396	245.42	268.88	78.324	331.6	178.67	78.376	175.29	219.79	78.341	127.58	170.48	41.574	419.89	484.04	41.569	399.46	286.91
79.564	233.44	249.27	79.492	327.83	180.37	79.545	174.47	220.7	79.513	129.17	169.68	42.195	423.73	466.15	42.19	399.67	286.94
80.73	223.36	202.07	80.658	335.07	180.1	80.713	172.2	215.43	80.681	125.17	165.34	42.815	544.65	454.03	42.812	398.24	286.17
81.898	191.82	216.51	81.826	341.25	180.6	81.881	171.52	212.53	81.85	119.62	160.22	43.436	632.49	441.91	43.43	399.31	287.04
83.066	194.01	242.13	82.993	336.33	179.17	83.049	173.61	211.87	83.021	119.11	154.51	44.056	657.48	431.64	44.049	400.42	290.98
84.232	147.28	195.93	84.159	338.63	179.59	84.217	172.32	209.05	84.188	119.42	149.29	44.676	645.44	422.79	44.668	404.89	292.72
85.401	137.98	171.61	85.327	342.64	181.75	85.385	170.37	207.06	85.356	119.36	145.3	45.294	617.09	421.56	45.29	405.14	292.86
86.568	133.74	160.85	86.495	370.18	201.64	86.554	172.55	206.63	86.526	118.18	144.91	45.915	592.39	414.93	45.911	403.23	292.39
87.736	134.03	157.66	87.663	909.97	304.4	87.721	172.4	206.12	87.694	118.71	146.46	46.536	574.9	406.1	46.536	405.61	292.04
88.904	132.87	155.62	88.831	908.99	320.5	88.889	172.32	202.7	88.862	117.86	147.7	47.156	553.55	413.68	47.159	405.25	291.38
90.072	132.44	155.03	89.999	851.42	318.89	90.058	173.49	201.07	90.03	117.64	147.33	47.776	532.68	415.35	47.779	404.44	291.57
91.24	133.77	156.5	91.167	793.33	301.42	91.226	173.6	200.85	91.199	118.37	146.33	48.396	510.82	403.65	48.402	404.66	290.7
92.406	133.8	154.11	92.335	580.07	251.2	92.394	172.5	199.34	92.366	117.38	145.85	49.016	490.99	394.51	49.023	404.89	289.7
93.574	132.86	151.21	93.502	429.86	216.99	93.562	172.02	194.86	93.534	119.58	149.58	49.636	474.71	393.13	49.647	402.23	288.7
94.743	138.32	150.99	94.67	381.32	198.39	94.73	170.06	197.66	94.702	118.16	148.3	50.257	465.83	387.73	50.269	403.2	287.01
95.911	233.59	150.33	95.837	355.28	185.82	95.899	172.24	196.1	95.87	117.12	150.53	50.878	458.01	382.35	50.891	401.44	284.55
97.079	223.32	152.03	97.005	347.4	178.3	97.066	171.49	192.48	97.038	118.57	148.86	51.495	451.25	505.63	51.514	402.24	287.43
98.247	210.72	152.73	98.173	342.23	171.11	98.235	175.59	194.68	98.21	116.57	151.93	52.116	445.37	719.61	52.138	401.62	285.47
99.415	175.61	154.16	99.339	341.75	175.5	99.403	175.85	192.26	99.378	122.64	161.81	52.736	437.64	765.11	52.762	401.68	284.26
100.583	142.38	149.05	100.508	342.21	173.6	100.571	173.9	191.19	100.547	126.89	170.22	53.358	432.58	745.67	53.384	400.62	283.86
101.751	133.31	149.66	101.675	339.93	170.69	101.739	178.21	192.32	101.72	126.28	169.33	53.979	425.7	698	54.007	401.59	286.16
102.918	132.07	149.64	102.844	335.34	171.24	102.907	187.48	192.96	102.89	124.78	167.65	54.598	421.82	643.95	54.631	404.88	288.93
104.088	132.93	149.4	104.012	338.11	169.63	104.074	196.11	191.65	104.06	123.03	161.16	55.218	419.76	597.87	55.256	404.32	288.34
105.255	132.9	148.57	105.18	339.77	173.47	105.243	197.47	188.54	105.228	119.42	154.67	55.839	421.7	565.76	55.881	405.39	288.47
106.423	137.05	150.28	106.348	336	172.58	106.41	203.26	189.59	106.396	118.07	148.6	56.459	419.86	526.55	56.506	403.83	286.82
107.592	133.2	153.37	107.516	402.17	206.68	107.579	204.83	190.71	107.566	117	145.9	57.079	416.55	491.81	57.128	402.56	286.94
108.76	164.33	150.35	108.684	848.61	280.15	108.747	206.71	191.38	108.734	117.03	145.29	57.699	412.3	474.84	57.754	404.28	286.22
109.928	214.1	151.15	109.852	672.17	253.52	109.915	206.45	187.69	109.902	116.45	145.37	58.319	410.25	509.12	58.378	402.2	284.68
111.094	220.64	149.17	111.02	483.04	217.53	111.083	205.13	191.66	111.071	118.22	146.04	58.939	413.69	493.22	59.002	402.83	284.74
112.262	201.29	149.73	112.189	379.04	195.06	112.251	206.26	191.86	112.239	117.64	146.81	59.559	518.3	464.4	59.627	403.15	283.96
113.431	169.43	147.83	113.357	351.85	181.47	113.419	203.74	189.93	113.407	116.96	147.17	60.177	618.84	448.29	60.249	402.35	285.36
114.599	140.79	147.44	114.524	338.75	171.31	114.588	205.77	190.43	114.575	117.67	148.89	60.799	650.57	430.24	60.874	402.56	284.64
115.767	133.62	150.11	115.692	336.93	171.32	115.755	201.35	190.99	115.743	117.75	147.6	61.42	638.65	415.09	61.493	402.96	284.06
116.935	144.19	148.37	116.86	337.12	168.24	116.924	201.19	189.96	116.911	118.52	149.21	62.04	611.36	399.65	62.117	401.84	284.01
118.104	194.55	147.27	118.028	341.3	166.06	118.092	197.03	191.15	118.079	118.72	151.44	62.657	586.44	389.76	62.741	402.67	284.12
119.272	155.75	146.94	119.196	337.33	169.41	119.26	195.76	189.16	119.248	124.66	168.9	63.277	562.56	381.76	63.364	404.35	286.28
120.441	137.64	145.4	120.364	332.78	169.02	120.432	193.84	189.69	120.416	126.36	171.52	63.897	537.96	377.07	63.99	406.91	291.03
121.608	132.84	149.14	121.533	338.84	167.03	121.6	187.13	191.62	121.584	124.67	166.96	64.518	516.97	391.15	64.615	406.87	291.73
122.777	132.91	145.42	122.701	338.26	169.98	122.768	186.81	188.13	122.752	119.97	163.21	65.138	509.39	389.07	65.24	406.26	290.73
123.945	177.09	148.55	123.869	337.87	171.91	123.941	183.7	191.28	123.922	118.36	156.84	65.758	536.33	387.32	65.863	404.26	289.15
125.111	198.62	149.76	125.037	339.07	175.01	125.108	184.42	191.22	125.089	117.98	149.44	66.375	631.44	389.16	66.488	403.42	287.33
126.279	154.05	147.23	126.205	342.23	169.73	126.276	178.11	191.88	126.257	117.11	147.18	66.995	659.07	385.18	67.112	405.08	289.12
127.446	134.86	146.89	127.371	339.78	171.46	127.448	177.32	185.93	127.425	117.82	147.12	67.616	648.91	380.42	67.736	415.56	304.76
128.614	131.47	149.52	128.539	334.86	171.47	128.616	172.69	188.95	128.594	117.56	146.43	68.238	617.26	387.67	68.36	422.22	312.61
129.78	132.35	150.3	129.705	334.67	171.99	129.784	169.34	189.53	129.762	117.08	145.6	68.859	584.63	386.13	68.984	421.77	310.78
130.948	135.46	149.5	130.874	337.25	172.69	130.952	172.75	186.3	130.93	115.88	146.53	69.479	558.31	380.2	69.608	419.81	308.45
132.117	135.46	150.73	132.042	339.05	175.87	132.122	172.63	186.25	132.098	117.08	148.36	70.1	537.07	591.53	70.227	416.62	303.66
133.285	136.85	147.48	133.208	331.94	174.33	133.292	169.27	186.12	133.265	118.82	148.39	70.718	517.71	742.94	70.852	413.09	299.27
134.453	137.79	146.86	134.376	336.04	171.97	134.464	171.67	186.38	134.433	118.39	146.16	71.338	508.81	771.85	71.477	409.34	298.37
135.621	135.75	147.91	135.544	331.68	171.16	135.632	171.84	185.22	135.602	120.23	155.75	71.958	495.9	818.4	72.101	409.87	294.22
136.789	137.66	149.91	136.712	331.8	170.58	136.8	170.49	184.8	136.77	128.2	169.2	72.575	481.02	791.2	72.726	406.03	290.27
137.957	232.06	150.91	137.88	332.54	175.43	137.968	170.67	183.8	137.938	124.12	171.2	73.195	468.47	738.37	73.346	406.02	287.86
139.124	227.38	146.7	139.048	334.33	173.94	139.139	170.77	186.1	139.106	126.04	165.24	73.816	462.21	696.44	73.971	403.61	285.37
140.292	211.57	145.75	140.216	331.21	175.52	140.312	171.14	182.52	140.274	119.75	156.99	74.436	453.47	650.8	74.595	402.95	283.88
141.46	158.69	146.18	141.385	332.61	175.07	141.48	171.19	183.66	141.442	117.51	155.31	75.058	445.84	604.77	75.22	402.79	283.26
142.628	136.91	144.39	142.551	332.25	173.73	142.648	170.93	182.1	142.61	117.83	148.59	75.679	442.21	564.78	75.846	401.3	282.5
143.796	136.08	149.3	143.719	333.03	178.49	143.817	171.37	181.39	143.778	118.29	146.03	76.299	444.09	527.15	76.47	400.49	282.28
144.964	133.84	146.06	144.886	335.96	176.65	144.985	169.97	180.27	144.947	116.03	145.31	76.919	441.91	495.86	77.094	401.1	282.04
146.131	133.69	148.42	146.054	338.38	176.99	146.155	169.83	179.19	146.115	117.63	143.84	77.536	441.05	473.58	77.716	399.88	279.51
147.3	134.73	149.03	147.222	337.07	173.59	147.323	171.21	182.77	147.282	117.87	145.79	78.156	435.07	453.96	78.34	400.3	281.37
148.466	131.79	147.36	148.39	331.28	179.75	148.495	171.41	181.98	148.45	118	145.52	78.778	430.91	437.65	78.964	400.91	280.01
149.635	136.39	150	149.559	335.48	175.36	149.664	172.86	182.32	149.618	117.46	150.17	79.399	432.74	424.65	79.589	398.79	279.41
150.803	135.19	147.56	150.727	335.26	174.14	150.832	172.81	180.73	150.786	118.14	149.45	80.02	441.15	411.56	80.214	399.39	278.71
151.971	134.6	148.12	151.895	331.57	177.14	152	171.45	180.73	151.954	118.19	148.26	80.641	451.24	401.57	80.839	399.84	278.35
153.141	134.72	149.63	153.063	328.3	180.16	153.17	171.74	177.64	153.121	120.21	159.47	81.261	456.88	395.45	81.463	397.21	276.94
154.309	131.73	147.77	154.229	331.59	179.79	154.34	184.5	180.71	154.29	127.59	168.65	81.882	452.74	393.89	82.089	399.97	279.39
155.477	134.46	145.65	155.397	329.84	179	155.508	192.4	177.37	155.457	124.7	166.55	82.504	447.73	395.53	82.713	399.01	278.86
156.645	139.6	148.15	156.565	325.15	177.65	156.676	200.63	177.49	156.625	123.7	164.97	83.125	447.6	391.8	83.332	399.9	279.23
157.812	176.59	147.39	157.733	328.09	176.19	157.843	203.5	176.2	157.793	121.36	156.08	83.746	444.92	389.84	83.956	398.06	278.3
158.98	226.02	149.37	158.901	329.56	178.08	159.012	206.22	176.99	158.961	118.7	150.23	84.363	441.59	383.72	84.581	399.99	278.16
160.148	220.71	148.92	160.069	337.67	179.8	160.18	203.46	178.68	160.129	117.7	150.53	84.984	436.42	384.13	85.206	399.82	280.12
161.314	191.63	149.85	161.237	331.98	176.6	161.348	205.73	174.64	161.297	117.01	146.24	85.605	438.35	383.41	85.831	400.61	282.05
162.482	150.36	147.47	162.405	331.56	179.48	162.516	205.87	175.73	162.465	116.75	145.86	86.224	501.72	379.92	86.455	400.56	282.58
163.65	136.84	146.13	163.572	337.43	179.23	163.684	203.75	173.99	163.634	117.75	148.43	86.845	611.99	378.13	87.079	402.76	285.01
164.818	133.78	149.66	164.741	333.41	179.43	164.852	203.45	174.03	164.801	118.68	145.94	87.464	641.09	380.13	87.705	404.78	288.73
165.987	131.41	151.33	165.909	337.15	185.51	166.02	202.51	173.6	165.969	118.37	144.71	88.085	632.06	407.8	88.331	407.61	292.85
167.154	137.09	146.79	167.075	334.47	181.74	167.188	199.7	172.87	167.137	118.21	146.41	88.705	603.66	413.1	88.955	409.19	294.64
168.322	212.78	147.18	168.244	409.61	242.8	168.356	196.72	170.19	168.305	118.59	149.83	89.326	579.78	471.41	89.58	420.37	310.18
169.491	221.97	148.48	169.412	904.31	302.35	169.523	192.27	172.91	169.473	117.43	150.15	89.947	560	502.69	90.206	427.9	316.86
170.659	198.64	147.56	170.578	909.62	318.59	170.692	190.55	171.74	170.641	116.89	149.58	90.567	541.99	482.18	90.83	428.87	314.43
171.826	170.96	147.37	171.747	853.84	314.77	171.86	188.17	169.87	171.808	117.08	148.02	91.187	523.11	476.2	91.455	425.97	308.03
172.995	143.24	146.19	172.913	806.79	307.49	173.028	185.44	170.34	172.979	116.46	147.79	91.807	507.22	457.64	92.074	420.47	303.42
174.161	134.65	145.32	174.08	606.41	264.42	174.196	181.8	170.28	174.146	117.49	149.49	92.424	492.7	434.57	92.694	417.3	298.81
175.329	133.18	148.61	175.249	438.44	235.24	175.364	178.08	169.15	175.314	124.43	168.56	93.044	480.57	422.54	93.316	413.99	295.69
176.496	207.65	145.32	176.416	383.47	212.44	176.532	177.1	172.19	176.482	126.62	166.99	93.668	468.45	410.45	93.941	410.99	291.34
177.662	173.21	146.92	177.585	357.62	196.66	177.701	172.75	169.55	177.651	127.34	168.31	94.289	461.37	401.2	94.566	409.46	289.45
178.83	141.86	148.18	178.753	348.29	180.89	178.868	172.34	168.99	178.819	126.17	165.05	94.912	454.44	470.17	95.184	407.83	287.03
179.998	133.7	147.75	179.921	346.26	180.58	180.035	169.33	167.59	179.987	122.84	158.62	95.532	449.97	731.62	95.806	407.51	286.17
181.166	133.09	144.93	181.089	344	176.2	181.203	172.77	169.03	181.154	118.65	150.22	96.152	445.61	793.47	96.426	405.02	284.47
182.332	133.78	149.1	182.257	344.81	174.1	182.371	169.66	168.94	182.323	116.6	148.19	96.774	445.21	793.74	97.049	403.38	284.22
183.497	136.43	148.82	183.427	341.77	174.85	183.539	168.42	169.04	183.49	116.85	144.29	97.396	449.12	747.34	97.67	407.84	289.81
184.665	136.76	146.28	184.596	341.01	173.64	184.707	167.92	170.47	184.658	118.4	144.7	98.016	456.43	710.42	98.29	410.99	295.31
185.831	132.73	147.77	185.764	342.3	170.21	185.875	167.68	168.23	185.826	116.62	142.7	98.638	472.24	675.67	98.913	411.65	296.02
186.999	137.05	146.56	186.932	342.13	169.2	187.044	167.26	166.77	186.994	116.48	143.48	99.263	527.16	629.51	99.532	411	294.73
188.167	134.67	149.17	188.1	339.06	172.95	188.211	170.17	170.87	188.162	117.53	144.79	99.885	619.95	608.29	100.157	409.24	291.5
189.333	136.42	275.65	189.268	336.99	167.14	189.378	166.53	165.9	189.33	117.35	146.16	100.504	638.31	567.07	100.781	405.9	289.22
190.501	135.88	222.43	190.436	338.52	170.32	190.546	169.14	169.29	190.498	117.25	148.97	101.126	620.08	529.2	101.405	405.02	286.6
191.667	135.75	176.41	191.604	342.38	172.85	191.715	170.9	166.74	191.666	115.68	146.4	101.748	597.3	498.71	102.025	403.2	286.5
192.835	138.53	209.85	192.772	343.3	168.49	192.883	169.29	168.65	192.833	117.25	146.8	102.368	603.09	470.87	102.647	405.4	286.73
194.004	138.98	231.6	193.941	344.08	169.12	194.051	167.67	167.31	194.001	115.86	147.15	102.989	668.22	459.67	103.27	403.73	286.8
195.171	134.82	184.84	195.107	335.64	171.57	195.219	170.05	165.97	195.169	119.84	161.21	103.608	677.62	477	103.894	403.14	286.58
196.339	134.24	163.44	196.275	333.48	170.61	196.388	168.04	166.56	196.337	125.14	171.35	104.233	653.85	462.76	104.519	402.98	286.78
197.507	138.71	157.06	197.443	338.49	171.19	197.556	168.77	163.29	197.505	125.85	168.83	104.858	623.24	445.05	105.139	401.95	285.97
198.675	134.91	154.36	198.611	335.13	176.23	198.724	167.07	164.22	198.673	125.9	167.54	105.483	631.18	452.22	105.759	401.81	284.39
199.843	134.35	152.37	199.779	334.59	171.59	199.892	168.87	163.67	199.841	127.23	164.29	106.107	685	442.78	106.376	400.38	281.57
201.011	220.75	153.86	200.947	335.15	171.08	201.06	169.78	164.03	201.009	120.78	157.32	106.726	677.65	430.33	106.997	400.09	281.09
202.179	226.77	151.98	202.116	340.44	171.79	202.228	167.29	163.06	202.179	119.17	149.53	107.348	644.07	422.82	107.617	398.26	279.7
203.347	217.97	149.13	203.284	338.06	174.45	203.396	169.64	163.21	203.349	118.01	144.63	107.97	612.26	412.72	108.238	399.06	279.75
204.514	183.24	149.48	204.451	337.18	174.56	204.564	167.98	161.73	204.519	118.77	146.48	108.595	591.79	403.79	108.856	399.25	278.86
205.682	146.89	152.59	205.619	336.29	172.31	205.733	168.69	163.56	205.688	117.66	144.78	109.215	576.35	395.5	109.477	399.7	280.18
206.848	135.63	150.78	206.787	338.51	173.62	206.9	167.1	162.6	206.859	116.83	144.02	109.84	559.45	389.87	110.097	398.99	279.88
208.016	134.99	150.29	207.955	336.4	176.56	208.068	168.67	163.18	208.029	115.9	143.84	110.462	544.72	389.33	110.717	398.92	279.32
209.184	130.95	147.93	209.123	338.86	175.96	209.236	169.96	162.76	209.2	117.15	144.83	111.084	527.23	396.24	111.337	396.93	278.62
210.351	132.32	151.1	210.291	344.12	174.15	210.404	170.4	162.76	210.371	117.51	146.53	111.703	509.39	393	111.956	399.29	279.68
211.519	133.23	149.29	211.458	338.56	177.71	211.572	171.48	160.08	211.543	116.58	151.24	112.326	495.22	390.45	112.574	399.13	279.27
212.688	132.63	147.45	212.627	334.07	177.63	212.74	187.5	166.04	212.711	122.07	168.17	112.951	483.11	388.47	113.194	397.7	278.31
213.856	134.89	148.27	213.793	339.29	179.73	213.908	197.17	174.2	213.881	124.1	168.8	113.576	474.59	383.31	113.816	400.07	280.67
215.024	137.08	148.64	214.961	340.56	177.53	215.077	200.62	178.84	215.049	123.53	169.33	114.199	467.44	386.53	114.436	400.09	280.96
216.194	136.3	151.02	216.129	336	176.98	216.244	204.85	178.95	216.217	123.86	167.71	114.821	465.7	403.31	115.056	400.29	281.1
217.414	133.7	150.01	217.297	334.65	179.47	217.412	204.88	181.12	217.388	120.69	158.38	115.443	465.06	400.42	115.676	399.44	280.65
218.938	139.31	145.52	218.465	336.88	178.58	218.58	205.22	183.53	218.556	117.95	150.33	116.067	461.69	400.86	116.296	400.37	280.83
220.106	136.04	150.15	219.632	335.07	183.66	219.748	205.24	195.19	219.724	117.35	146.9	116.691	459.43	397.54	116.916	399.84	280.5
221.275	133.61	149.52	220.801	330.84	179.7	220.917	201.1	212.79	220.894	114.67	146.03	117.308	460.53	538.1	117.535	399.15	281.43
222.444	136.88	147.12	221.969	331.45	182.17	222.085	202.46	228.78	222.064	114.88	146.08	117.932	459.98	760.24	118.155	401.2	280.65
223.612	233.18	148.95	223.136	333.02	180.72	223.253	197.25	236.86	223.232	117.07	143.41	118.554	467.65	836.67	118.78	401.98	283.52
224.78	229.01	150.12	224.304	338.22	181.48	224.422	197.95	239.99	224.402	117.44	143.7	119.177	476.56	825.33	119.403	405.25	286.65
225.948	217.58	146.7	225.472	339.32	183.14	225.59	194.13	242.39	225.57	116.24	148.28	119.802	485.46	786.28	120.023	404.78	287.93
227.116	209.82	148.56	226.64	333.95	179.25	226.758	190.61	238.64	226.739	117.06	150.31	120.426	490.79	745.49	120.645	404.51	286.11
228.284	154.22	146.28	227.808	333.33	182.43	227.926	185.82	238.45	227.907	116.52	150.51	121.048	490.42	711.4	121.271	402.2	285.51
229.453	138.27	142.9	228.976	333.43	182.14	229.094	183.32	240.28	229.077	118.38	146.78	121.667	482.25	712.56	121.895	401.73	285.7
230.622	133.12	148.6	230.144	333.67	179.16	230.263	181.61	240.84	230.245	115.83	146.64	122.291	471.72	847.13	122.514	401.15	284.71
231.79	132.28	148.84	231.313	338.07	181.97	231.431	174.64	236.96	231.413	116.42	148.29	122.916	462.08	822.5	123.133	402	283.96
232.958	133.25	146.66	232.481	335.25	181.48	232.599	174.67	237.55	232.582	120.49	164.02	123.539	458.64	755.33	123.751	402.64	284.94
234.126	136.27	147.85	233.649	338.4	189.22	233.767	170.74	237.81	233.75	123.52	168.51	124.164	461.36	706.68	124.372	402.59	283.83
235.294	133.14	148.18	234.818	338.18	189.74	234.937	170.24	236.18	234.917	124.38	166.41	124.784	466.89	654.25	124.992	401.43	282.48
236.462	134.75	146.34	235.985	343.74	194.81	236.105	168.56	237.07	236.086	122.24	161.99	125.404	474.32	605.85	125.612	400.34	283.31
237.63	135.46	148.04	237.153	338.55	194	237.273	168.32	233.48	237.253	118.15	155.35	126.028	473.34	569.97	126.232	403.12	285.94
238.798	137.5	145.49	238.321	333.71	189.52	238.441	170.46	229.87	238.425	115.8	147.6	126.653	472.1	542.48	126.85	402.49	285.88
239.967	135.28	146.86	239.49	340.92	189.26	239.612	165.47	227.94	239.593	116.86	147.44	127.275	475.09	512.85	127.47	402.33	285.74
241.136	133.97	146.52	240.659	340.28	183.92	240.783	165.47	226.72	240.761	115.11	146	127.9	484.91	489.63	128.088	401.96	285.63
242.304	140.37	144.01	241.827	338.75	189.46	241.951	166.17	223.71	241.929	115.7	144.77	128.525	488.51	472.79	128.708	400.51	282.96
243.472	229.46	143.52	242.995	335.86	190.74	243.12	166.66	221.46	243.097	116.04	145.01	129.145	482.31	459.22	129.325	400.36	283.05
244.641	227.3	145.9	244.163	337.19	189.12	244.288	166.12	218.36	244.268	115.93	144.85	129.767	473.19	444.92	129.945	401.17	281.55
245.809	198.26	144.35	245.33	335.53	187.74	245.456	166.46	217.64	245.437	116.35	145.58	130.389	466.02	433.2	130.563	400.1	281.93
246.977	185.9	144.53	246.498	340.85	186.39	246.624	168.09	209.6	246.606	115.49	147.85	131.008	466.98	424.8	131.183	399.75	281.33
248.145	143.82	144.32	247.666	338.72	192.65	247.792	168.39	211.86	247.774	116.69	146.66	131.632	476.38	417.6	131.802	399.07	280.28
249.311	134.75	145.62	248.834	337.09	192.88	248.961	166.11	210.11	248.942	114.23	146.63	132.257	498.77	409.95	132.423	397.83	281.61
250.48	133.18	144.26	250.003	334.14	188.75	250.13	169.28	205.24	250.11	116.18	147.52	132.882	587.21	407.66	133.043	398.71	281.64
251.648	132.08	146.73	251.171	337.28	192.83	251.297	166.08	202.06	251.278	115.34	147.72	133.505	628.85	415.68	133.663	398.26	280.44
252.816	134.87	145.68	252.339	339.91	188.72	252.465	166.45	200.47	252.446	115.06	146.54	134.127	621.07	411.26	134.283	398.42	279.79
253.984	134.09	145.33	253.507	337.11	189.03	253.633	166.91	197.01	253.614	115.35	147.16	134.749	599.27	407.39	134.902	398.36	280.58
255.152	132.92	143.79	254.675	344.85	191.46	254.801	164.67	198.04	254.783	115.32	148.32	135.373	599.88	429.78	135.522	399.06	281.11
256.32	136.68	145.15	255.843	882.33	302.27	255.969	165.49	195.75	255.95	115.19	148.05	135.998	649.28	475.98	136.142	399.87	282.56
257.488	134.11	145.67	257.011	907.49	316.24	257.136	166.99	192.37	257.118	116.06	148.13	136.62	660.46	480.1	136.762	402.07	285.19
258.654	132.55	145.49	258.179	914.37	317.74	258.304	167.21	192.77	258.286	115.31	145.08	137.245	638.59	460.15	137.381	404.06	289.04
259.822	135.65	144.29	259.347	867.32	310.76	259.473	167.12	188.92	259.454	114.98	145.85	137.866	608.07	441.16	138.001	403.5	289.64
260.99	137.63	146.59	260.515	680.31	271.76	260.64	166.35	192.9	260.622	114.96	146.51	138.491	584.56	438.01	138.62	403.36	288.1
262.158	134.88	143.12	261.683	468.64	242.13	261.808	166.02	190.3	261.79	114.49	147.69	139.113	565.86	425.66	139.238	400.78	286.94
263.326	135.18	143.43	262.851	399.24	220.59	262.976	165.3	189.98	262.958	115.22	155.09	139.731	546.86	421.78	139.858	400.04	285.08
264.493	136.82	140.91	264.018	374.78	200.6	264.144	168.32	187.55	264.127	122.08	167.02	140.353	528.73	459.87	140.478	400.64	285.65
265.661	233.56	145.12	265.187	359.08	187.19	265.312	165.72	185.17	265.295	124.13	171.19	140.975	523.85	466.83	141.1	400.51	285.63
266.827	227.81	143.87	266.354	354.05	181.3	266.48	164.5	186.53	266.463	122.63	165.51	141.595	519.18	461.54	141.72	399.64	284.16
267.996	208.33	143.62	267.522	352.87	177.35	267.649	166.22	186.1	267.631	121.99	161.25	142.219	511.06	497.62	142.342	396.98	283.44
269.164	182.18	144.01	268.69	349.08	176.3	268.818	166.12	187.96	268.799	118.88	154.57	142.845	499.96	495.15	142.96	399.15	282.92
270.332	144.54	142.9	269.856	351.73	180.87	269.985	164.76	185.91	269.967	117.65	149.44	143.469	487.62	475.63	143.58	398.93	284.81
271.5	135.65	144.12	271.024	349.95	176.32	271.153	171.77	183.89	271.137	114.97	145.73	144.094	478.17	456.31	144.201	400.12	286.51
272.667	134.52	142.86	272.192	344.59	171.82	272.321	188.26	185.15	272.304	113.22	144.23	144.717	474.66	441	144.821	400.9	287.78
273.835	133.37	147.37	273.36	346.94	172.83	273.489	193.6	183.05	273.473	114.72	142.89	145.34	476.76	427.37	145.442	402.54	289.11
275.003	134.16	145.72	274.529	344.76	170.77	274.657	198.72	183.69	274.641	115.58	144.58	145.957	481.15	421.59	146.059	402.3	288.81
276.171	135.93	144.83	275.696	350.05	175.52	275.825	201.66	188.87	275.809	114.13	143.44	146.577	484.2	414.7	146.679	402.8	287.81
277.339	133.01	141.62	276.864	346.85	171.83	276.993	201.92	185.81	276.977	114.98	145.26	147.202	480.91	408.1	147.299	401.79	287.34
278.507	136.1	143.68	278.032	350.43	173.43	278.162	201.79	192.18	278.145	114.76	145.88	147.823	478.68	408.52	147.92	401.28	286.3
279.675	135.82	144.5	279.198	347.67	171.19	279.329	198.5	197.65	279.313	115.17	144.28	148.447	477.02	406.93	148.541	402.06	287.3
280.843	135.97	144.72	280.366	345.68	173.09	280.497	196.79	197.83	280.481	114.68	145.09	149.069	473.22	416.25	149.161	409.35	296.44
282.01	135.3	144.5	281.534	345	178.14	281.665	193.27	199.79	281.649	113.08	146.52	149.689	476.65	694.21	149.781	411.12	299.23
283.178	137.81	142.78	282.7	340.47	170	282.833	190.15	218.61	282.817	114.07	144.3	150.311	490.71	790.46	150.402	411.44	300.28
284.346	133.39	143.87	283.869	342.17	175.84	284.001	190.32	232.11	283.985	114.1	150.62	150.935	527.13	807.8	151.022	411.29	297.3
285.514	137.4	146.59	285.035	342.75	175.53	285.17	185.7	235.17	285.153	123.98	167.34	151.555	586.48	809.87	151.645	412.17	305.54
286.682	136.29	142.74	286.204	346.23	175.18	286.339	182.74	243.02	286.321	121.17	167.52	152.18	604.68	756.43	152.264	429.67	329.75
287.854	136.22	143.58	287.374	338.63	180.75	287.508	176.84	238.15	287.489	123.52	165.38	152.8	590.61	707.04	152.883	498.56	416.79
289.024	132.85	144	288.542	341.29	177.24	288.675	173.67	239.92	288.658	121.03	162.51	153.422	567.98	653.21	153.503	616.2	586.66
290.192	137.7	143.58	289.71	342.28	179.28	289.843	169.71	243.35	289.829	118.59	156.79	154.046	553.55	606.44	154.121	685.64	693.79
291.362	139.93	143.55	290.878	346.77	178.29	291.011	166.01	239.26	290.998	117.13	148.1	154.67	541.31	569.73	154.741	722.98	753.37
292.529	136.87	142.86	292.046	341.78	180.22	292.179	165.11	237.71	292.167	116	146.64	155.292	542.47	538.64	155.361	744.13	787.55
293.698	137.71	142.92	293.214	342.09	179.83	293.347	166.32	235.62	293.335	116.15	143.26	155.914	536.77	510.42	155.981	753.56	805.75
294.867	135.06	144.02	294.381	340.13	180.52	294.515	163.76	232.06	294.503	114.5	143.95	156.538	527.07	486.15	156.601	748.8	802.88
296.033	137.27	143.32	295.55	343.29	180.57	295.683	165.2	231.19	295.671	114.67	144.03	157.16	512.82	467.13	157.222	730.38	775.71
297.201	136.25	140.44	296.718	343.05	184.05	296.852	165.87	226.23	296.839	114.61	146.17	157.78	508.8	454.24	157.842	704.27	737.34
298.367	136.46	143.61	297.888	348.91	178.02	298.019	165.75	222.81	298.006	115.75	147.5	158.402	584.18	440.46	158.462	677.47	698.67
299.535	137.17	146.82	299.057	343.18	183.64	299.187	162.24	222.05	299.174	115.78	144.03	159.024	629.63	439.65	159.082	651.39	660.34
						300.355	164.95	217.48	300.342	113.95	144.67	159.647	627.27	453.99	159.703	637.22	642.79
						301.522	163.91	212.52	301.51	115.36	146.65	160.271	604.58	448.25	160.323	624.24	617.93
						302.692	164.46	209.78	302.678	117.7	163.85	160.895	597.42	470.19	160.942	604.29	583.95
						303.862	162.88	204.83	303.846	121.13	164.45	161.517	608.19	707.99	161.562	583.79	550.22
						305.032	163.63	200.84	305.014	122.22	166.71	162.136	605.71	784.96	162.183	564.07	517.24
						306.202	161.88	197.77	306.182	120.22	159.99	162.758	583.65	833.39	162.804	547.54	488.39
						307.372	166.19	200.09	307.349	115.45	152.37	163.382	558.17	797.91	163.424	534.13	467.12
						308.544	178.39	196.87	308.52	115.45	146.35	164.006	542.79	741.59	164.044	525.84	448.21
						309.716	190.95	194.49	309.687	114.04	146.59	164.628	531.65	688	164.664	520.32	434.3
						310.886	197.78	191.78	310.855	114.58	146.64	165.251	519.45	644.27	165.284	510.4	418.21
						312.055	202.82	191.02	312.023	115.12	145.88	165.871	510.44	601.38	165.904	499.06	404.06
						313.223	207.33	188.11	313.191	116.29	144.44	166.496	510.78	565.96	166.529	487.64	389.64
						314.391	205.38	189.25	314.359	114.15	142.25	167.121	517.81	534.91	167.148	477.68	378
						315.559	204.22	185.97	315.527	115.09	142.89	167.742	525.75	508.79	167.767	469.82	367.49
						316.727	200.82	184.91	316.694	113.88	142.92	168.364	528.29	483.51	168.389	462.77	359.71
						317.895	196.88	184.93	317.863	115.59	149.73	168.986	519.35	491.05	169.011	455.87	354.99
						319.063	193.15	184.42	319.031	119.89	162.32	169.61	506.52	505.74	169.633	449.5	344.92
						320.231	189.7	183.93	320.199	121.84	164.3	170.235	496.97	491.91	170.256	446.44	340.71
						321.4	182.56	185.33	321.367	121.98	162.92	170.857	491.29	470.52	170.88	441.56	335.89
						322.569	182.2	184.21	322.535	117.7	157.4	171.479	494.51	459.54	171.499	437.97	332.9
						323.737	175.98	186.4	323.703	115.09	149.87	172.104	514.54	446.58	172.124	434.81	329.17
						324.906	171.66	184.53	324.87	115.78	146.89	172.728	543.64	442.64	172.744	430.34	325.56
						326.076	170.57	184.81	326.037	113.89	145.49	173.345	563.59	440.65	173.365	428.4	322.24
						327.244	170.23	185.52	327.208	115.88	143.98	173.965	558.98	431.05	173.988	423.2	318.65
						328.416	167.58	186.66	328.379	114.47	142.3	174.589	542.39	431.06	174.608	422.56	318
						329.587	169.04	187.35	329.547	114.51	144.22	175.211	531.87	421.63	175.229	420.84	315.13
						330.76	168.5	186.75	330.717	115.12	142.09	175.831	525.63	447.44	175.85	417.97	312.4
						331.929	168.14	185.63	331.887	114.17	142.88	176.455	514.31	511.36	176.469	418.42	312.14
						333.097	169.56	187.9	333.055	115.05	143.35	177.08	503.48	516.53	177.088	415.43	309.33
						334.266	168.63	186.75	334.226	113.88	143.32	177.702	502.43	512.88	177.712	415.94	307.85
						335.434	169.22	186.97	335.397	113.95	142.74	178.324	516.54	510.63	178.334	413.23	305.01
						336.602	164.99	188.09	336.566	116.1	143.6	178.943	547.13	488.68	178.959	411.6	303.57
						337.77	167.06	189.45	337.735	115.25	142.5	179.568	576.71	467.71	179.582	410.64	300.12
						338.938	165.98	191.12	338.903	114.5	143.57	180.192	582.11	451.09	180.204	410.59	300.97
						340.106	166.5	194.49	340.073	113.4	142.57	180.817	563.89	440.34	180.823	408.9	299.9
						341.275	166.86	195.99	341.242	114.16	142.54	181.436	550.19	440.03	181.447	409.59	299.58
						342.442	165.43	200.06	342.41	113.99	144.63	182.054	540.99	433.84	182.067	412.56	300.62
						343.61	164.82	203.14	343.578	114.01	140.65	182.674	531.48	426.62	182.691	411.53	301.07
						344.778	165.02	211.41	344.746	113.22	144.66	183.294	521.12	427.71	183.315	410.7	299.64
						345.946	166.29	230.56	345.915	116.19	147.84	183.912	509.73	422.23	183.937	410.54	299.85
						347.114	167.57	240.33	347.087	120.42	164.83	184.532	502.16	418.86	184.556	410.82	298.49
						348.282	165.85	244.43	348.255	121.89	166.63	185.151	504.17	605.16	185.178	409.88	297.39
						349.449	165.85	246.32	349.423	120.95	163.9	185.768	516.39	774.37	185.798	409.33	296.8
						350.618	165.91	244.94	350.591	119.76	160.09	186.389	529.76	785.27	186.419	408.78	295.12
						351.785	167.15	247.91	351.759	117.62	153.54	187.009	536.3	819.72	187.039	409.68	295.47
						352.953	168.3	245.97	352.928	113.86	147.07	187.629	537.23	800.18	187.659	409.14	294.44
						354.121	171.05	242.91	354.096	113.48	145.36	188.249	526.33	769.49	188.279	407.77	292.68
						355.289	188.45	239.69	355.265	114.05	144.27	188.867	516.59	732.54	188.899	408.15	293.67
						356.457	196.19	238.15	356.433	112.91	141.95	189.487	507.52	681.2	189.52	408.02	294.27
						357.625	200.25	233.86	357.601	114.44	143.08	190.108	502.83	639.83	190.143	406.73	292.4
						358.792	204.16	229.88	358.769	112.56	143.31	190.728	503.81	603.17	190.764	406.77	292.73
						359.961	201.79	223.47	359.937	112.26	142.54	191.349	502.24	563.23	191.383	407.15	292.95
						361.128	197.08	223.1	361.105	113.53	142.38	191.973	502.12	533.05	192.004	405.31	291.7
						362.296	196.06	221.19	362.273	113.73	143.35	192.595	503.86	509.16	192.624	405.01	291.29
						363.464	193.46	214.28	363.441	114.74	144.9	193.213	502.62	515.78	193.244	406.04	290.15
						364.632	192.5	210.53	364.61	112.21	143.22	193.837	504.95	500.92	193.863	404.54	290.2
						365.8	188.02	206.73	365.778	113.6	144.74	194.461	519.4	482.25	194.483	405.33	291.38
						366.968	183.49	200.68	366.946	115.42	157.15	195.083	526.8	472.01	195.105	410.37	300.77
						368.136	177.81	197.8	368.114	121.49	166	195.708	543.16	462.25	195.724	415.27	305.33
						369.305	174.94	196.47	369.281	120.79	164.45	196.33	555.88	449.59	196.344	414.65	306.63
						370.472	168.76	191.6	370.449	120.67	161.9	196.95	552.8	441	196.964	415.84	305.36
						371.64	168.8	189.16	371.617	118.39	154.53	197.575	538.58	439.75	197.585	415.05	303.09
						372.808	164.4	189.73	372.785	116.11	147.41	198.197	523.33	431.51	198.205	410.95	300.59
						373.976	165.32	185.95	373.953	115.01	143.37	198.819	515.46	428.23	198.825	411.23	299.07
						375.144	164.1	183.93	375.121	113.96	141.94	199.442	515.38	427.95	199.445	410.98	296.5
						376.312	161.12	183.35	376.289	114.04	140.55	200.066	538.16	428.56	200.065	408.18	295.44
						377.48	162.59	185.41	377.458	113.31	140.82	200.691	578.46	445.49	200.683	407.96	293.5
						378.649	164.24	181.73	378.625	113.6	142.15	201.314	581.13	447.3	201.304	407.6	292.61
						379.817	164.33	181.46	379.793	112.93	139.92	201.936	564.76	439.11	201.924	406.47	290.71
						380.985	164.42	184.75	380.961	114.08	143.52	202.56	542.03	430.63	202.544	405.33	290.6
						382.153	164.56	182.09	382.129	119.8	161.04	203.184	530.24	428.09	203.166	407.53	290.51
						383.322	164.69	182.96	383.297	121.97	162.27	203.809	516.27	425.09	203.786	406.06	290.97
						384.489	163.95	182.88	384.465	120.17	162.05	204.431	504.43	420.99	204.405	405.02	289.76
						385.658	164	180.91	385.633	116.07	154.47	205.056	499.17	416.45	205.026	405.33	290.04
						386.826	163.46	181.85	386.801	114.3	147.39	205.677	498.63	426.93	205.644	404.92	288.41
						387.996	162.94	180.71	387.969	114.07	144.11	206.299	494.53	428.72	206.262	403.82	289.46
						389.164	162.39	180.62	389.136	114.87	141.08	206.921	490.54	513.89	206.884	404.1	290.89
						390.334	164.24	180.07	390.304	113.3	141.48	207.54	492.28	757.94	207.501	404.57	287.97
						391.504	164.47	181.11	391.473	112.23	141.77	208.163	510.42	807.91	208.121	404.28	288.84
						392.675	163.19	179.8	392.641	114.88	145.25	208.783	528.22	808.39	208.742	403.79	289.2
						393.843	162.28	181.67	393.809	112.49	143.97	209.403	529.43	764.5	209.36	404.84	288.68
						395.011	164.73	183.43	394.977	115.07	144.95	210.028	516.61	776.92	209.981	405.22	288.83
						396.179	162.31	186.81	396.145	114.8	144.73	210.653	502.98	859.81	210.602	404.71	288.66
						397.347	163.46	196.51	397.312	112.83	145.6	211.275	502.45	841.47	211.222	405.23	288.76
						398.515	163.67	204.31	398.479	113.15	143.37	211.897	522.84	791.1	211.843	404.14	288.44
						399.683	164.48	230.64	399.649	113.05	143.58	212.519	541.48	732.63	212.463	404	289.08
						400.851	164.3	242.86	400.815	115.15	152.66	213.143	544.14	679.55	213.081	404.63	288.96
						402.018	164.13	244.39	401.984	122.37	161.63	213.768	532.59	635.14	213.702	403.93	288.93
						403.187	163.06	246.23	403.152	121.75	162.5	214.387	518.55	593.65	214.323	401.86	287.82
						404.355	163.97	245.58	404.32	121.06	159.8	215.009	506.82	558	214.944	402.4	287.47
						405.522	165.41	249.93	405.488	119.29	157.34	215.634	501.7	549.72	215.565	403.71	287.92
						406.69	181.83	245.07	406.655	113.86	149.89	216.258	500.87	531.6	216.185	403.19	288.19
						407.858	192.99	243	407.824	114.62	144.68	216.88	498.59	509.08	216.805	403.5	287.28
						409.026	198.34	239.29	408.993	112.66	143.42	217.502	492.66	489.3	217.423	402.73	288.18
						410.194	199.86	233.8	410.16	114	139.24	218.127	489.76	473.12	218.045	402.98	288.29
						411.362	198.47	231.01	411.33	113.21	138.86	218.751	490.69	466.36	218.665	402.57	287.83
						412.531	197	225.98	412.498	113.36	138.97	219.376	486.96	455.45	219.286	402.45	285.8
						413.698	193.66	223.36	413.666	114.2	139.1	219.998	484.82	615.86	219.906	404.97	287.64
						414.866	194.24	219.07	414.834	113.56	141.26	220.62	490.38	765.4	220.527	403.7	287.96
						416.034	190.92	216.08	416.001	113.07	141.82	221.241	494.66	763.47	221.147	403.19	288.87
						417.202	184.97	212.92	417.17	112.48	143.46	221.861	493.25	716.02	221.767	404.89	288.25
						418.37	179.74	209.05	418.339	113.41	142.97	222.481	502.41	673.57	222.387	404.29	286.94
						419.538	176.62	205.64	419.507	113.48	141.54	223.102	512.46	632.67	223.006	403.06	287.16
						420.705	173.08	202.74	420.675	113.68	140.6	223.722	514.28	595.61	223.626	403.22	287.56
						421.874	167.33	194.7	421.843	114.36	150.03	224.343	510.55	573.82	224.244	403.21	287.66
						423.041	166.41	194.28	423.011	122.29	162.79	224.964	503.87	543.15	224.865	402.25	288.4
						424.21	164.12	194.18	424.179	120.03	162.58	225.585	500.88	519.94	225.486	403	287.54
						425.378	162.48	195.1	425.346	122.92	159.94	226.205	504.27	496.54	226.106	401.48	286.74
						426.546	161.95	192.86	426.515	118.65	158.19	226.825	507.06	479.13	226.727	402.72	288.48
						427.714	160.29	190.37	427.684	114.32	151.74	227.445	505.45	466.29	227.347	403.91	287.74
						428.882	160.76	187.5	428.852	115.14	146.84	228.065	503.93	455.98	227.967	403.29	287.25
						430.05	160.87	188.58	430.02	114.08	144.17	228.686	514.05	448.31	228.588	403.13	288.5
						431.219	162.26	184.95	431.188	116.2	144.11	229.306	525.75	450.3	229.208	402.75	287.38
						432.386	160.31	183.63	432.356	113.92	142.8	229.927	528.3	445.48	229.827	403.74	288.71
						433.553	162.35	183.15	433.524	113.4	141.38	230.547	520.88	437.15	230.449	404.51	289.21
						434.722	160.51	181.81	434.692	113.68	139.75	231.167	511.39	498.09	231.071	404.89	288.84
						435.89	162.3	181.36	435.859	113.47	141.78	231.789	503.59	540.39	231.693	404.22	289.28
						437.06	162.14	182.58	437.028	113.56	143.16	232.41	504.49	529.95	232.313	404.39	289.41
						438.228	162.08	183.52	438.196	118.43	154.06	233.03	509.22	578.13	232.937	404.02	288.9
						439.396	163.68	186.63	439.364	121.88	161.92	233.651	512.23	596.88	233.56	403.7	287.84
						440.565	162.83	192.52	440.533	120.63	158.6	234.269	517.43	578.15	234.183	402.53	287.4
						441.732	162.54	193.69	441.701	118.04	153.01	234.89	526.75	601.37	234.8	404.25	288.22
						442.899	160.09	194.77	442.869	116.81	147.46	235.51	521.86	709.11	235.422	403.77	288.99
						444.067	163.6	219.15	444.037	115.27	142.71	236.131	513.47	721.31	236.046	403.4	289.47
						445.235	158.14	236.87	445.204	114.03	138.97	236.751	509.66	702.49	236.67	412.64	304
						446.403	160.97	243.46	446.373	114.59	140.58	237.371	506.19	664.31	237.292	558.33	521.08
						447.571	160.42	248.23	447.541	114.84	143.08	237.989	509.2	617.4	237.917	659.46	672.34
						448.74	162.03	248.88	448.709	113.62	142.85	238.609	511.22	579.73	238.539	714.72	756.57
						449.913	162.36	248.85	449.878	114.85	143.49	239.23	509.16	552.59	239.159	745.51	800.7
						451.08	162.4	245.23	451.047	113.99	145.14	239.849	504.91	524.85	239.782	759.73	823.09
						452.248	163.48	243.55	452.215	119.87	163.64	240.469	499.83	502.29	240.404	762.64	833.12
						453.42	182.08	237.44	453.382	120.57	164.04	241.089	496.94	500.81	241.024	753.9	824.26
						454.588	195.9	234.38	454.549	122.43	161.07	241.709	494.51	507.36	241.643	732.3	793.48
						455.758	200.08	229.17	455.717	118.72	157.42	242.329	495.83	492.38	242.267	703.38	747.76
						456.926	199.05	226.7	456.885	116.41	149.28	242.95	504.34	475.7	242.889	672.02	701.92
						458.094	198.28	220.69	458.053	113.15	144.04	243.57	545.23	464.07	243.514	644.71	657.69
						459.263	194.2	215.95	459.221	113.92	142.95	244.19	581.13	476.22	244.139	624.55	619.22
						460.432	190.94	214.12	460.388	114.96	139.29	244.811	580.6	717.93	244.761	602.34	582.3
						461.6	186.16	207.87	461.556	114.01	140.21	245.428	565.44	762.51	245.386	584.43	547.45
						462.768	181.59	204.99	462.724	114.63	140.1	246.048	550.11	732.57	246.008	562.62	513.63
						463.936	177.39	202.01	463.893	113.67	146.53	246.666	538.69	705.06	246.633	546.38	488.02
						465.104	174.98	198.37	465.061	121.44	162.71	247.286	528.59	661.2	247.255	532.37	464.82
						466.272	165.64	195.49	466.229	119.34	164.72	247.903	521.61	644.69	247.879	518.06	442.87
						467.44	163.72	191.8	467.397	119.7	162.33	248.524	516.5	624.13	248.498	504.84	427.12
						468.609	165.21	191.11	468.565	117.82	157.65	249.144	514.26	585.83	249.119	494.67	409.71
						469.778	160.19	188.54	469.732	114.42	148.9	249.764	514.6	574.69	249.74	483.96	396.15
						470.946	158.23	184.27	470.901	114.47	144.96	250.385	510.84	554.14	250.361	475	384.61
						472.114	158.86	184.47	472.069	114.31	143.22	251.006	506.75	530.28	250.983	465.63	374.38
						473.282	157.26	184.03	473.236	114.18	142.39	251.626	499.86	515	251.607	458.37	365.29
						474.449	160.63	185.26	474.404	111.86	140.14	252.247	501.87	497.58	252.231	451.74	357.19
						475.617	159.82	181.76	475.572	112.71	140.99	252.867	518.39	492.25	252.856	446.18	350.92
						476.785	159.7	181.45	476.74	114.69	141.66	253.488	543.21	495.74	253.481	442.69	345.78
						477.953	159.92	186.27	477.908	114.42	143.21	254.108	564.97	486.22	254.106	437.96	341.7
						479.121	159.99	189.48	479.075	113.87	142.78	254.729	570.55	500.22	254.73	431.69	336
						480.289	160.82	193.19	480.244	113.02	142.06	255.35	565.37	507.75	255.349	429.78	332.5
						481.458	158.63	193.43	481.412	115.66	156.4	255.971	555.37	491.05	255.969	427.41	329.91
						482.626	158.88	195.51	482.58	118.86	163.88	256.588	541.3	507.92	256.589	424.47	326.9
						483.793	161.25	195.91	483.748	121.53	163.72	257.208	533.53	734.59	257.21	423.51	325.07
						484.962	159.57	200.49	484.916	121.87	159.06	257.829	535.24	750.83	257.832	420.2	320.92
						486.13	159.21	198.93	486.084	115.77	151.66	258.449	545.52	724.67	258.457	417.42	320.24
						487.298	157.14	203.24	487.252	115.32	146.38	259.07	561.92	676.94	259.082	416.82	318.87
						488.466	158.43	201.77	488.419	113.78	144.71	259.69	571.6	627.65	259.704	415.2	316.68
						489.634	158.77	202.61	489.588	113.38	140.83	260.308	559.6	602.87	260.326	413.68	316.05
						490.802	158.81	200.29	490.755	113.52	141.38	260.928	544.56	573.15	260.95	412.16	313.81
						491.969	158.87	197.61	491.923	112.32	141.37	261.549	535.42	542.12	261.574	412.05	313.86
						493.138	160.47	197.27	493.091	113.66	140.37	262.169	527.1	513.23	262.196	410.23	311.99
						494.307	160.39	195.95	494.259	112.37	142.93	262.79	518.51	495.71	262.815	409.69	312.28
						495.474	169.04	196.78	495.427	114.01	143.42	263.408	512.72	479.11	263.433	409.25	312.06
						496.642	188.69	192.99	496.595	114.08	143.13	264.027	509.67	466.19	264.051	411.76	312.39
						497.81	195.72	190.39	497.763	113.55	140.58	264.644	507.21	457.46	264.671	410.7	312.03
						498.978	200.62	190.47	498.932	113.31	141.91	265.267	512.57	451.28	265.291	413.24	312.66
						500.146	197.39	183.69	500.099	112.24	146.36	265.887	559.38	444.95	265.909	414.19	313.16
						501.314	193.93	183.16	501.267	120.03	163.33	266.506	590.61	457.06	266.53	415.38	313.58
						502.481	192.67	182.45	502.435	119.6	164.69	267.126	580.33	458.83	267.15	414.96	311.57
						503.65	187.64	181.59	503.603	119.22	158	267.747	561.73	452.76	267.769	415.01	313.66
						504.817	180.92	181.15	504.771	115.57	151.18	268.368	547.7	451.89	268.389	418.2	316.97
						505.985	178.66	179.64	505.939	115.09	147.58	268.988	542.16	454.86	269.009	418.5	317.89
						507.153	171.98	179.49	507.106	112.61	143.54	269.608	549.05	451.01	269.627	419.51	319.71
						508.321	168.28	177.28	508.275	113.19	141.93	270.228	544.68	443.98	270.247	417.13	316.48
						509.489	165.76	177.54	509.443	113.36	139.88	270.849	537.82	442.9	270.867	415.37	314.12
						510.657	161.29	177.7	510.611	112.88	140.97	271.469	530.2	436.64	271.487	415.92	315.2
						511.826	158.2	180.68	511.779	112.11	139.77	272.09	524.62	474.19	272.108	413.63	312.52
						512.995	156.67	184.93	512.947	112.61	140.1	272.71	527.59	721.2	272.728	413.78	312.46
						514.162	160	189.31	514.115	112.19	140.9	273.331	528.57	766.45	273.347	411.98	309.77
						515.329	159.47	189.3	515.283	113.02	139.75	273.951	528	807.66	273.964	411.72	310.45
						516.497	158.64	192.24	516.452	112.49	144.09	274.571	531.52	775.22	274.584	425.25	327.69
						517.665	157.06	199.68	517.621	113.38	142.29	275.189	536.37	729.47	275.205	477.28	383.73
						518.833	158.13	198.38	518.789	114.01	145.53	275.81	534.97	696.66	275.825	591.3	552.09
						520.001	158.45	216.7	519.957	112.84	144.1	276.43	531.02	663.41	276.445	667.14	667.82
						521.169	158.95	235.54	521.125	113.61	140.13	277.051	539.31	622.43	277.066	713.29	747.97
						522.338	158.16	245.52	522.293	114.5	141.07	277.672	544.23	582.7	277.683	733.29	784.72
						523.505	155.8	244.62	523.461	113.48	141.87	278.29	542.71	576.81	278.301	729.04	783.71
						524.673	158.19	245.71	524.629	114.5	146.25	278.91	537.79	569.17	278.919	715.44	768.79
						525.841	159.6	247.99	525.796	113.08	144.96	279.532	533.36	541.1	279.54	693.6	737.67
						527.009	156.79	245	526.965	112.55	141.85	280.152	533.05	528.55	280.16	665.9	694.61
						528.177	156.7	243.74	528.133	113.23	140.61	280.772	536.83	508.83	280.78	642.19	658.07
						529.346	156.44	238.15	529.301	112.81	142.48	281.393	551.96	488.79	281.398	622.82	622.16
						530.513	157.08	233.06	530.47	114.74	146.34	282.013	579.66	487.37	282.015	603.16	587.04
						531.682	156.4	229.22	531.637	112.68	143.8	282.634	591.59	480.66	282.636	584.19	556.03
						532.849	156.97	224.42	532.805	114.32	144.14	283.254	584.88	471.06	283.256	566.92	528.61
						534.017	157.43	219.42	533.973	112.35	141.89	283.874	576.8	497.14	283.874	551.83	501.73
						535.185	158.91	215.37	535.14	113.54	144.16	284.494	571.58	512.88	284.494	535.82	477.77
						536.353	157.14	212.18	536.308	112.71	143.96	285.115	563.14	501.78	285.114	523.31	455.91
						537.521	156.83	209.37	537.476	115.04	144.49	285.736	548.15	633.31	285.734	511.01	438.65
						538.689	156.79	207.43	538.644	112.97	142.77	286.357	536.91	753.12	286.353	498.62	422.15
						539.858	156.75	204.6	539.812	112.96	141.99	286.978	533.04	745.28	286.973	488.39	406.92
						541.027	162.67	203.56	540.979	112	145.51	287.598	532.53	702.83	287.594	480.54	395.4
						542.194	184.16	202.1	542.147	112.48	141.33	288.218	544.01	665.96	288.214	472.52	384.25
						543.362	191.8	198.76	543.315	112.28	143.51	288.838	545.3	618.15	288.834	464.49	374.77
						544.53	194.76	195.01	544.482	114.2	144.75	289.458	537.21	583.9	289.454	457.47	366.89
						545.698	197.84	193.06	545.65	111.89	143.52	290.078	530.64	559.71	290.073	452.66	359.55
						546.866	193.34	190.35	546.818	112.16	142.86	290.7	537.07	533.09	290.693	448.66	354.72
						548.034	187.89	188.07	547.986	113.19	141.34	291.32	543.67	538.79	291.313	443.21	349.17
						549.201	186.24	186.45	549.154	112.59	140.49	291.941	537.56	533.48	291.934	439.83	344.34
						550.37	179.58	185.82	550.322	113.32	141.86	292.562	528.19	516.07	292.554	435.67	340.37
						551.537	177.11	183.7	551.491	119	158.5	293.18	522.06	533.18	293.174	431.91	336.72
						552.705	171.7	181.69	552.659	120.07	161.31	293.802	525.55	524.66	293.791	428.4	332.79
						553.873	166.38	180.57	553.829	120.16	159.16	294.422	534.65	505.98	294.411	426.86	331.24
						555.041	163.23	178.87	554.999	122.75	160.37	295.042	537.09	502.3	295.031	424.32	328.21
						556.209	159.73	179.91	556.167	118.02	154.17	295.661	533.08	495.4	295.652	421.5	326.9
						557.377	157.07	180.08	557.335	115.43	146.8	296.279	529.36	496.44	296.271	418.53	324.5
						558.546	155.11	180.58	558.507	115.64	143.78	296.898	527.66	488.65	296.892	418.2	321.37
						559.715	154.3	181.46	559.677	113.02	140.88	297.519	524.93	478.22	297.513	416.81	320.94
						560.883	157.87	186.12	560.85	112.23	139.83	298.139	518.92	469.84	298.134	417.42	319.88
						562.051	155.78	191.96	562.02	113.7	140.01	298.761	523.9	459.13	298.754	417.26	317.16
						563.219	155.95	197.8	563.189	112.2	139.68	299.381	531.08	458.18	299.373	489.09	387.87
						564.386	155.05	198.7	564.357	113.77	141.74	299.999	533.41	459.63	299.993	599.56	561.35
						565.555	157.29	218.27	565.527	113.71	141.64	300.617	528.44	454.92	300.611	665.18	658.07
						566.723	156.17	239.09	566.697	113.4	141.1	301.238	527.9	454.11	301.23	696.18	715.43
						567.891	155.56	246.96	567.869	114.17	141.38	301.863	534.3	500.77	301.851	714.11	764.36
						569.06	153.67	245.57	569.04	114.15	141.4	302.488	546.99	508.01	302.469	715.52	775.05
						570.228	154.44	246.51	570.211	113.41	141.6	303.112	549.37	504.47	303.09	707.84	773.45
						571.396	157.22	245.38	571.38	112.05	142.77	303.73	537.21	553.57	303.707	699.46	760.74
						572.564	152.64	241.32	572.551	118.96	159.33	304.35	531.57	549.11	304.328	672.47	722.89
						573.732	157.48	240.98	573.719	120.69	164.7	304.971	528.24	523.95	304.945	645.56	679.28
						574.9	157.84	232.82	574.889	119.9	157.92	305.591	527.67	501.43	305.565	622.88	648.01
						576.068	156.09	230.95	576.059	118.12	155.11	306.212	524.27	495.28	306.186	603.93	615.55
						577.24	156.52	221.08	577.231	116.59	143.65	306.833	519.24	483.28	306.807	583.73	581.23
						578.409	157.93	215.19	578.401	111.75	140.95	307.451	511.44	468.73	307.427	567.52	548.43
						579.581	158.31	214.1	579.571	112.94	140.11	308.071	504.15	467.7	308.047	551.2	521.54
						580.753	157.27	210.12	580.742	110.7	139.67	308.691	504.77	694.28	308.665	538.46	497.08
						581.923	156.8	206.83	581.913	112.9	139.83	309.308	511.4	769.84	309.285	524.76	474.69
						583.091	159.39	204.91	583.081	113.76	141.86	309.928	523.01	765.91	309.906	513.33	454.02
						584.26	181.79	201.63	584.253	112.65	139.95	310.545	520.29	748.17	310.523	500.74	438.35
						585.429	191.48	196.27	585.423	110.59	139.26	311.163	513.74	702.17	311.143	489.59	419.41
						586.596	195.34	196.82	586.591	111.94	142.13	311.784	512.72	661.36	311.762	483.06	410.6
						587.764	190.93	192.96	587.763	113.64	142.9	312.404	515.65	621.86	312.38	473.22	399.19
						588.932	189.07	192.01	588.936	115.14	151.13	313.025	518.49	585.61	313	467.68	390.37
						590.1	184.79	190.62	590.105	121.34	163.2	313.645	519.59	557.76	313.62	460.47	381.01
						591.268	181.68	189.41	591.276	121.7	160.03	314.262	520.16	541.36	314.237	454.26	373.52
						592.436	176.75	184.7	592.444	118.47	155.51	314.882	515.86	516.69	314.857	447.35	364.26
						593.605	169.94	183.98	593.612	115.42	149.93	315.503	513.53	504.74	315.475	443.52	360.5
						594.774	167.1	186.23	594.784	114.1	141.68	316.123	509.61	500.12	316.095	438.55	354.09
						595.941	160.63	184.38	595.954	110.87	139.93	316.741	507.75	485.65	316.716	436.69	350.59
						597.109	161.1	182.54	597.122	112.3	139.99	317.361	508.78	472.52	317.336	433.3	347.29
						598.277	156.3	184.55	598.293	113.36	138.35	317.982	518.01	485.22	317.953	430.78	342.98
						599.445	156.86	192.79	599.464	113.39	139.54	318.602	529.64	488.07	318.573	428.23	339.97
												319.222	530.11	475.62	319.192	426.16	339.61
												319.842	525.17	470.9	319.812	425.66	337.82
												320.462	520.25	472.73	320.433	424.27	335.51
												321.083	527.01	466.91	321.054	425.76	335.61
												321.703	544.28	464.91	321.674	422.43	332.72
												322.323	558.51	688.09	322.291	421.03	331.49
												322.944	562.78	762.58	322.909	420.13	327.79
												323.561	555.11	772.38	323.527	417.24	326.85
												324.181	543.25	776.5	324.147	418.76	324.85
												324.803	541.25	747.8	324.768	416.27	325.06
												325.421	548.82	714.58	325.388	415.18	323.14
												326.042	546.64	675.57	326.006	416.1	321.37
												326.662	535.87	634.03	326.626	414.51	319.96
												327.283	528.27	607	327.247	414.88	320.43
												327.903	527.89	569.44	327.868	412.12	318.98
												328.523	531.41	542.3	328.489	420.25	331.42
												329.144	530.05	523.54	329.108	538.98	487.45
												329.764	525.83	506.86	329.726	630.13	614.06
												330.385	520.62	493.84	330.343	677.43	680.85
												331.006	516.86	478.36	330.964	696.5	710.12
												331.626	519.96	468.59	331.584	695.16	711.44
												332.246	520.94	464	332.204	678.65	689.46
												332.866	515.71	456.37	332.824	653.41	654.38
												333.488	513.38	457.88	333.445	628.92	618.82
												334.105	517.88	454.34	334.065	606.51	584.93
												334.725	532.44	470.9	334.682	587.33	557.73
												335.346	540.66	506.19	335.303	570.79	531.11
												335.967	536.85	504.38	335.924	553.71	505.37
												336.588	531.85	503.66	336.544	536.52	479.97
												337.208	530.11	536.31	337.164	523.28	459.06
												337.829	523.83	521.06	337.784	510.29	441.72
												338.449	514.8	515.4	338.404	503.45	429.67
												339.067	515.34	504.5	339.025	493.32	416.84
												339.687	514.69	496.06	339.645	485.22	404.42
												340.307	516.37	487.69	340.264	474.9	392.53
												340.928	511.65	472.09	340.882	466.53	383.42
												341.548	507.15	460.17	341.502	460.42	373.76
												342.168	508.7	467.6	342.12	454.37	368.63
												342.788	506.92	461.17	342.74	449.54	360.22
												343.408	513.1	459.86	343.36	443.93	354.86
												344.029	524.33	470.25	343.977	440.94	350.3
												344.648	522.88	460.98	344.598	437.71	347.9
												345.268	518.73	453.24	345.219	434.27	343.84
												345.886	516.66	451	345.837	430.31	339.97
												346.506	515.1	484.4	346.457	426.33	337.23
												347.123	523.45	494.4	347.077	426.01	335.79
												347.743	541.43	485.14	347.697	423.9	332.95
												348.364	543.19	478.7	348.318	422.13	330.15
												348.984	533.8	471.13	348.938	421.64	329.35
												349.604	528.85	469.55	349.559	419.86	327.59
												350.222	523.71	487.24	350.18	418.85	326.14
												350.842	520.93	478.4	350.8	417.76	325.94
												351.46	515.74	651.34	351.42	418.45	326.74
												352.08	512.07	769.58	352.038	417.34	325.76
												352.701	509.72	760.41	352.659	416.85	325.5
												353.321	514.53	713	353.278	415.99	324.6
												353.939	522.21	686.5	353.899	415.61	323.04
												354.56	522.8	647.93	354.52	413.72	322.86
												355.179	516.6	705.92	355.141	413.97	323.01
												355.799	511.33	722.05	355.762	414.69	323.08
												356.419	511.88	681.76	356.38	411.61	320.72
												357.037	518.11	645.9	357	414	321.99
												357.658	516.52	599.01	357.62	413.68	322.31
												358.277	517.11	571.24	358.241	415.07	323.05
												358.897	517.63	566.7	358.862	416.3	323.87
												359.518	519	546.06	359.481	412.94	320.12
												360.138	520.12	529.35	360.102	413.52	319.22
												360.758	534.97	511.24	360.722	411.54	317.73
												361.378	549.21	509.39	361.342	411.63	317.03
												361.998	554.25	524.06	361.962	412.19	318.12
												362.618	546.35	511.24	362.582	412.93	316.92
												363.239	543.67	524.8	363.203	413.48	316.19
												363.86	540.94	689.94	363.822	411.9	316.28
												364.479	540.6	744.54	364.443	412.38	314.12
												365.097	536.53	745.85	365.063	411.93	315.08
												365.717	527.66	710.81	365.683	413.57	315.22
												366.337	517.64	661.07	366.303	413.17	315.58
												366.958	510.07	636.52	366.923	413.09	316.83
												367.578	506.38	600.17	367.543	415.02	319.55
												368.199	506.73	569.07	368.162	415.17	320.03
												368.817	503.47	541.86	368.782	414.75	317.3
												369.437	498.38	518.13	369.403	415.74	318.49
												370.057	495.82	500.97	370.021	416.38	318.68
												370.677	496.67	499.99	370.639	415.68	318.32
												371.299	507.71	533.83	371.259	415.12	319.3
												371.919	516.37	519.18	371.879	416.96	319.58
												372.538	518.09	509.84	372.499	416.74	319.12
												373.156	514.8	501.92	373.119	417.44	318.98
												373.778	507.58	486.15	373.737	415.33	319.33
												374.398	505.5	481.15	374.355	413.54	315.59
												375.018	511.51	468.97	374.975	414.14	316.59
												375.64	513.39	568.46	375.595	412.44	314.09
												376.259	505.88	741.53	376.215	413.47	315.55
												376.879	500.92	751.02	376.835	412.18	313.92
												377.498	500.26	726.65	377.454	410.73	313.09
												378.119	497.07	676.87	378.074	411.32	313.54
												378.742	494.34	636.1	378.692	409.82	313.24
												379.361	493.49	619.75	379.31	410.89	313.31
												379.983	492.11	596.75	379.93	408.5	312.48
												380.607	492.57	563.24	380.548	410.46	313.4
												381.231	489.66	536.6	381.169	411.85	315.92
												381.851	489.06	515.54	381.79	413.45	318.1
												382.468	486.91	498.21	382.408	412.88	317.28
												383.087	482.65	481.26	383.029	413.72	317.35
												383.709	481.63	476.82	383.649	412.98	316.03
												384.331	487.8	471.36	384.269	411.34	314.86
												384.955	499.77	460.07	384.887	410.34	315.85
												385.578	507.3	467.88	385.506	413.19	316.1
												386.197	508.9	501	386.126	411.16	314.43
												386.817	502.79	494.93	386.744	410.85	316.64
												387.437	498.48	499.5	387.364	413.18	317.66
												388.058	496.66	486.89	387.985	414.05	317.15
												388.679	494.65	488.72	388.604	412.53	317.87
												389.299	493.38	499.03	389.224	412.47	318.17
												389.917	493.64	486.9	389.844	416.8	326.85
												390.541	498.18	478.59	390.465	421.54	330.19
												391.166	501.25	468.72	391.085	422.46	329.75
												391.79	507.99	459.23	391.706	423.92	330.57
												392.41	513.92	461.3	392.325	423.17	329.59
												393.03	518.8	484.14	392.946	420.44	327.99
												393.651	513.98	482.03	393.567	421.05	326.86
												394.27	505.68	497.38	394.187	418.12	322.08
												394.889	498.9	731.54	394.807	416.07	320.91
												395.509	496.01	776.19	395.427	415.07	320.14
												396.126	495.97	765.49	396.046	413.35	317.48
												396.747	504.21	725.27	396.666	410.78	316.62
												397.368	512.62	675.18	397.287	411.1	315.98
												397.989	514.38	628.54	397.908	409.59	316.1
												398.61	512.47	587.85	398.527	409	315.8
												399.23	513.86	558.87	399.147	407.42	314.06
												399.848	508.6	531.9	399.765	408.55	314.53
												400.468	501.49	507.18	400.385	409.62	314.4
												401.088	496.98	510.42	401.006	408.68	314.11
												401.71	500.35	739.96	401.626	409.59	314.35
												402.331	500.55	766.44	402.246	407.03	313.25
												402.952	503.38	750.58	402.867	407.34	311.88
												403.572	514.44	713.76	403.487	407.75	312.25
												404.192	548.05	663.4	404.107	406.12	311.8
												404.812	581.04	622.01	404.725	407.49	313.3
												405.433	579.56	588.99	405.345	407.5	312.44
												406.053	565.13	560.65	405.965	407.65	312.58
												406.671	551.62	563.59	406.587	406.08	311.64
												407.288	543.83	587.32	407.207	405.59	312.34
												407.906	536.91	562.8	407.827	404.34	310.86
												408.526	530.13	532.26	408.444	406.36	312.79
												409.146	521.21	514.71	409.065	407.66	311.92
												409.766	515.52	501.24	409.685	406.52	312.49
												410.385	513.32	485.12	410.305	407.36	312.32
												411.006	512.69	479.4	410.923	407.9	312.94
												411.626	511.12	476.88	411.544	407.51	312.26
												412.247	504.87	471.15	412.163	408.48	312.96
												412.869	500	462.46	412.784	408.66	314.36
												413.486	497.28	453.15	413.402	410.01	316.68
												414.108	494.42	459.58	414.024	409.11	315.51
												414.73	489.9	460.64	414.643	406.79	315.09
												415.354	483.11	458.2	415.265	406.09	315.31
												415.979	476.99	481.49	415.89	407.68	314.05
												416.601	479.21	479.3	416.515	407.34	315.19
												417.224	479.72	464.83	417.14	405.97	313.41
												417.844	479.91	480.95	417.759	405.25	313.16
												418.466	476.12	515.04	418.381	405.03	314.27
												419.086	476.43	512.77	419.003	405.91	315.44
												419.707	480.71	503	419.626	404.77	314.4
												420.331	502.75	488.09	420.245	404.57	314.3
												420.953	513.87	480.73	420.866	403.72	315.06
												421.578	498.26	473.5	421.488	404.81	315.38
												422.2	479.19	490.58	422.113	407.01	317.83
												422.824	463.43	495.52	422.733	408.7	318.18
												423.446	452.76	486.41	423.357	409.22	317.56
												424.068	448.74	478.8	423.979	409.13	316.91
												424.69	444.47	481.98	424.599	410.01	317.73
												425.312	439.23	473.57	425.219	443.89	358.52
												425.932	439.26	465.41	425.839	602.42	614.32
												426.557	436.66	463.89	426.458	695.53	755.02
												427.181	432.24	456.26	427.081	748.24	833.5
												427.803	433.47	455.89	427.703	777.05	878.94
												428.422	432.47	458.22	428.325	792.07	901.56
												429.044	428.35	473.45	428.95	789.52	903.04
												429.668	428.27	485.89	429.569	775.03	881.81
												430.291	433.25	491.25	430.19	747.42	841.91
												430.913	441.95	515.48	430.81	725.98	798.54
												431.536	449.84	509.51	431.431	698.91	755.01
												432.161	451.86	521.2	432.052	675.88	713.26
												432.785	457.03	510.11	432.672	650.71	675.02
												433.407	467.46	495.51	433.292	630.65	639.11
												434.027	467.81	625.46	433.912	608.87	604.31
												434.647	462.9	776.64	434.53	596.7	586.57
												435.269	458.65	788.14	435.15	583.96	563.18
												435.891	457.08	784.81	435.768	565.89	536.32
												436.516	458.44	740.49	436.389	550.42	510.09
												437.139	462.31	700.33	437.01	534.41	487.86
												437.761	465.43	657.69	437.63	520.39	466.72
												438.385	465.95	625.58	438.248	508.49	449.07
												439.002	473.85	590.29	438.868	497.75	435.87
												439.622	491.53	559.37	439.486	490.15	424.43
												440.246	506.93	532.3	440.108	479.81	412.55
												440.865	516.4	510.41	440.733	473.13	404.09
												441.484	515.79	495.15	441.358	466.37	394.52
												442.108	504.12	539.7	441.98	459.15	388.32
												442.732	498.91	552.41	442.602	452.89	380.11
												443.356	491.43	536.15	443.226	447.88	376.45
												443.976	488.15	514	443.85	442.23	371.01
												444.598	485.29	505.96	444.47	438.73	368.78
												445.221	484.25	610.34	445.093	433.23	362.48
												445.842	492.82	688.49	445.711	431.44	360.23
												446.462	499.78	671	446.332	427.72	357.19
												447.081	515.09	642.84	446.954	426.26	354.85
												447.702	546.88	606.77	447.576	422.97	352.29
												448.327	563.79	612.86	448.198	419.81	350.43
												448.952	556.14	597.44	448.823	416.73	346.37
												449.576	542.18	570.73	449.445	417.35	345.94
												450.199	534.7	573.55	450.07	417.14	345.02
												450.819	528.73	551.52	450.692	415.53	342.94
												451.438	523.45	526.23	451.312	412.56	341.56
												452.062	512.75	505.59	451.932	412.89	340.86
												452.681	505.34	500.26	452.552	411.66	339.99
												453.299	503.09	498.82	453.176	409.48	337.44
												453.919	506.42	483.72	453.797	411.11	337.75
												454.537	509.87	470.84	454.418	407.89	335.57
												455.159	508.94	469.44	455.037	406.98	334.31
												455.78	506.19	463.33	455.658	406.32	333.36
												456.4	501.07	460.11	456.278	406.05	332.49
												457.018	491.51	456.44	456.898	405.57	331.98
												457.638	487.58	454.66	457.518	405.15	332.67
												458.258	489.62	453.81	458.138	405.58	334.87
												458.878	498.93	454.72	458.758	405.72	337.09
												459.499	507.37	452.13	459.379	405.35	335.07
												460.119	514.32	457.25	459.999	404.6	334.61
												460.738	518.78	470.19	460.62	406.73	334.27
												461.358	514.64	472.83	461.239	407.3	334.86
												461.975	507.12	471.18	461.858	405.69	334.31
												462.594	499.38	461.53	462.477	407.53	333.31
												463.214	492.02	493.7	463.098	407.44	332.53
												463.832	485.15	508.07	463.718	405.75	331.51
												464.452	484.29	499.53	464.337	406.87	332.32
												465.073	487.24	498.71	464.959	406.98	332.81
												465.69	493.03	483.96	465.58	406.16	332.7
												466.31	513.36	471.55	466.201	406.39	332.65
												466.93	554.35	464.15	466.821	407.78	334
												467.548	591.9	459.59	467.443	406.4	333.72
												468.166	592.93	489.83	468.063	407.72	333.27
												468.787	578.48	489.06	468.684	406.13	331.42
												469.406	568.41	492.47	469.304	405.84	331.43
												470.027	557.75	487.88	469.922	406.19	330.32
												470.648	542.14	490.06	470.54	405	328.23
												471.272	528.24	503.09	471.16	404.24	329.73
												471.892	516.43	493.61	471.78	405.08	328.56
												472.516	507.26	528.5	472.401	405.75	328.95
												473.134	505.7	758.53	473.021	406.41	328.24
												473.754	509.64	781.97	473.642	405.78	329.31
												474.379	509.98	773.65	474.26	406.01	329.11
												474.999	504.87	750.03	474.88	408.34	331.66
												475.622	493.6	707.73	475.501	407.46	330.98
												476.242	488.97	694.38	476.121	408.25	330.93
												476.866	492.58	652.96	476.742	409.94	329.41
												477.49	497.28	610.07	477.362	408.46	330.8
												478.113	499.59	571.4	477.983	408.89	330.25
												478.731	499.05	540.27	478.603	407.57	328.9
												479.354	491.95	516.61	479.224	407.25	328.7
												479.977	483.33	500.51	479.842	407.9	328.76
												480.601	479.15	484.9	480.46	406.85	328.46
												481.223	481.17	472.3	481.08	406.14	326.47
												481.841	491.01	494.89	481.701	406.1	328.66
												482.463	503.79	513.84	482.321	408.01	333.08
												483.082	511.88	506.17	482.942	409.19	334.94
												483.703	516.52	491.19	483.563	412.56	335.57
												484.323	509.38	488.91	484.181	415.29	337.11
												484.946	499.05	476.03	484.802	416.61	333.93
												485.568	488.75	462.95	485.422	415.66	335.02
												486.188	479.66	454.22	486.042	414.86	334.92
												486.808	474.21	452.22	486.662	416.94	337.44
												487.43	475.85	482.16	487.28	418.17	341.62
												488.052	475.66	487.68	487.9	417.53	343.03
												488.675	484.96	487.54	488.518	418.9	346.24
												489.295	507.61	505.32	489.139	427.38	361.32
												489.914	555.6	495.19	489.759	438.77	373.62
												490.538	594.39	477.81	490.379	444.12	377.24
												491.158	594.67	472.99	491	445.41	378.38
												491.78	577.33	471.26	491.618	441.75	373.24
												492.398	558	466.7	492.237	436.39	366.78
												493.015	543.23	467.03	492.857	433.34	363.42
												493.636	532.37	459.97	493.477	431.83	361.23
												494.257	520.56	456.16	494.098	430.13	359.86
												494.877	513.06	496.54	494.718	426.45	357.21
												495.497	508.66	501.74	495.338	426.36	355.95
												496.117	502.82	491.8	495.958	424.55	354.75
												496.737	492.5	484.07	496.58	422.01	350.41
												497.355	488.56	472.94	497.2	418.96	346.7
												497.975	484.39	468.52	497.821	414.46	342.82
												498.592	481.87	701.35	498.441	413.74	342.24
												499.213	477.48	789.49	499.062	413.07	341
												499.833	471.43	805.38	499.682	410	337.73
												500.45	468.73	830.06	500.302	407.96	334.16
												501.072	464.39	788.56	500.922	406.71	333.15
												501.692	465.81	740.59	501.542	404.27	331.42
												502.312	475.82	746.81	502.162	403.63	332.36
												502.929	509.39	724.07	502.783	402.94	333.78
												503.549	576.08	672.93	503.401	410.66	342.3
												504.166	603.36	624.24	504.022	417.66	350.53
												504.784	595.38	583.81	504.642	420.21	353.09
												505.409	578.13	553.1	505.26	420.34	352.55
												506.032	563.14	528.39	505.878	420.25	353.15
												506.653	550.31	509.6	506.498	420.12	353.42
												507.272	537.8	492.08	507.118	418.99	352.2
												507.891	522.03	481.16	507.737	416.91	350.09
												508.512	506.58	481.08	508.357	415.8	346.46
												509.133	496.05	477.31	508.977	415.65	345.76
												509.751	487.71	478.45	509.597	416.15	348.15
												510.371	481.46	470.59	510.214	422.82	357.63
												510.988	476.27	461.2	510.833	427.35	360.02
												511.608	470.68	694.56	511.453	430.74	360.24
												512.225	473.66	770.44	512.074	434.34	365.74
												512.846	477.53	746.22	512.695	435.46	365.79
												513.466	480.25	732.57	513.314	434.17	363.72
												514.086	479.26	842.25	513.935	431.53	363.46
												514.706	474.59	832.93	514.554	432.14	369.24
												515.326	471.39	778.06	515.173	434.6	371.74
												515.948	469.03	730.28	515.794	432.91	370.42
												516.568	473.64	671.65	516.412	427	364.61
												517.188	539.71	622.38	517.032	425.01	358.26
												517.809	605.01	581.19	517.653	419.67	352.01
												518.43	614.89	548.76	518.274	418.08	348.93
												519.048	597.99	523.99	518.894	416.29	345.15
												519.668	574.79	506.76	519.514	411.2	341.56
												520.288	557.05	490.79	520.132	408.69	339.19
												520.908	546.6	491.29	520.752	406.28	336.19
												521.529	535.65	485.82	521.373	406.26	335.51
												522.146	518.23	472.46	521.991	404.3	334.28
												522.767	503.91	464.44	522.612	403.32	335.28
												523.388	494.45	466.49	523.233	403.1	332.82
												524.008	488.18	458.24	523.853	401.18	333.03
												524.628	482.6	447.05	524.473	403.04	334.54
												525.248	475.78	442.2	525.096	402.25	334.66
												525.869	470.02	442.43	525.716	404.37	336.83
												526.487	468.71	443.96	526.336	404.54	337.77
												527.108	466.86	440.82	526.959	402.73	337.75
												527.728	464.16	439.35	527.583	402.58	336.46
												528.349	461.99	438.86	528.205	402.93	337.21
												528.967	458.7	434.41	528.827	406.95	341.7
												529.588	456.53	481.01	529.451	405.32	341.29
												530.208	453.39	515.58	530.073	406.57	341.27
												530.829	452.7	508.11	530.695	405.65	342.62
												531.449	456.2	490.94	531.317	404.79	341.1
												532.07	459.53	471.65	531.942	405	339.29
												532.69	465.18	555.96	532.566	403.38	339.39
												533.307	466.6	766.57	533.189	401.05	337.93
												533.929	465.77	790.18	533.811	399.65	335.24
												534.549	471.04	753.62	534.431	399.35	334.16
												535.169	480.25	719.4	535.049	398.36	333.06
												535.789	492.58	672.17	535.674	398.63	331.96
												536.41	522.97	634.08	536.293	397.87	331.32
												537.03	593.68	602.88	536.918	398.34	330.49
												537.651	624.56	565.56	537.543	400.85	334.39
												538.271	616.99	540.13	538.168	406.68	340.05
												538.891	599.99	517.72	538.793	408.88	341.59
												539.509	585.4	499.49	539.417	410.14	341.77
												540.13	575.75	485.44	540.04	410.4	339.51
												540.748	564.59	476.75	540.662	408.59	337.85
												541.368	553.41	468.86	541.285	407.8	337.33
												541.991	541.13	598.45	541.909	407.2	340.39
												542.612	530.2	772.82	542.528	411.37	343.78
												543.232	519.48	828.86	543.148	412.61	345.82
												543.852	507.36	796.59	543.768	410.72	344.2
												544.472	491.23	737.35	544.388	406.82	339.89
												545.094	484.32	693.21	545.007	406.52	341.37
												545.715	478.01	646.13	545.628	408.01	344.68
												546.335	473.14	601.47	546.249	409.86	347.75
												546.956	466.76	577.56	546.87	408.4	349.36
												547.576	459.69	547.97	547.491	409.51	348.47
												548.196	455.78	523.11	548.109	409.21	346.02
												548.816	451.61	505.37	548.731	409.03	344.08
												549.436	452.97	505.11	549.351	412.77	348.53
												550.056	453.27	488.83	549.971	415.64	350.51
												550.677	458.32	471.79	550.588	416.43	351.44
												551.297	457.76	463.75	551.208	416.27	348.64
												551.918	453.34	454.27	551.825	416.22	349.73
												552.538	452.67	446.81	552.443	419.27	354.66
												553.158	465.06	440.9	553.063	423.33	358.99
												553.778	546.54	440.52	553.683	422.18	357.26
												554.398	610.5	439.87	554.302	419.21	353.97
												555.019	614.4	484.95	554.923	417.16	350.88
												555.64	597.94	739.55	555.544	413.36	349.8
												556.261	595.06	764.91	556.162	412.15	346.57
												556.881	590.31	739.31	556.782	409.51	343.91
												557.498	570.05	705.71	557.402	406.8	341.12
												558.115	549.19	662.13	558.022	404.98	339.47
												558.735	531.2	661.29	558.642	404.56	339.82
												559.354	513.54	622.23	559.263	406.33	342.89
												559.974	495.69	578.4	559.88	409.57	345.21
												560.592	484.44	544.61	560.5	408.76	343.93
												561.213	475.97	535.45	561.121	406.62	342.85
												561.834	469.87	546.97	561.741	407.13	343.15
												562.454	463.31	523.29	562.361	405.86	339.13
												563.074	459.85	501.3	562.981	405.56	339.22
												563.695	456.18	495.31	563.601	404.65	338.36
												564.315	458.18	479.17	564.221	403.56	338.62
												564.938	464.4	463.84	564.842	402.78	335.18
												565.56	476.58	454.1	565.461	400.14	334.21
												566.182	498.06	457.35	566.082	400.22	335.23
												566.801	551.02	451.7	566.703	399.44	334.44
												567.422	613.69	447.44	567.323	398.13	333.64
												568.041	618.84	445.68	567.943	397.99	333.12
												568.662	598.96	441.11	568.561	398.83	334.91
												569.282	575.73	435.4	569.18	399.46	335.85
												569.906	555.22	434.04	569.799	399.56	337.87
												570.531	536.43	434.65	570.419	401.82	339.66
												571.15	516.73	442.98	571.04	403.31	340.51
												571.773	502.14	445.63	571.66	403.57	340.87
												572.397	490.2	446.07	572.28	402.7	339.34
												573.019	479.13	441.15	572.9	404.22	339.92
												573.639	470.76	435.15	573.52	401.52	337.11
												574.259	467.81	433.88	574.14	402.62	339.71
												574.879	463.67	444.07	574.76	400.68	339.65
												575.502	458.5	443.19	575.381	400.11	339.13
												576.125	459.48	551.62	576.006	398.73	338.48
												576.744	459.39	763.52	576.628	399.49	335.89
												577.364	464.15	802.53	577.246	399.87	336.04
												577.986	497.1	842.7	577.864	397.67	336.73
												578.608	600.04	808.7	578.484	397.07	336.16
												579.23	627.24	751.1	579.108	397.8	335.74
												579.855	616.1	700.17	579.732	397.34	336.87
												580.479	590.2	654.6	580.356	397.58	337.2
												581.104	564.99	642.2	580.981	397.98	336.39
												581.726	544.85	607.81	581.605	397.3	335.88
												582.348	523.75	570.89	582.225	399.34	337.21
												582.972	505.2	539.13	582.845	406.11	348.3
												583.595	494.98	517.36	583.468	416.47	358.7
												584.215	485.29	500.39	584.086	431.22	378.33
												584.832	477.17	521.62	584.709	562.07	592.37
												585.457	467.3	550.73	585.334	666.63	771.39
												586.082	458.18	532.02	585.953	723.97	864.65
												586.704	454.89	507.83	586.573	757.62	918.07
												587.327	464.18	488.24	587.192	775.75	946.93
												587.946	485.84	472.83	587.815	779.26	953.14
												588.566	513.4	462.05	588.435	770.19	941.33
												589.189	564.23	455.21	589.055	747.45	906.99
												589.809	607.77	456.19	589.672	727.13	872.86
												590.428	597.66	688.05	590.29	704.51	830.93
												591.048	573	781.29	590.91	679.26	787.09
												591.668	548.81	770.26	591.528	657.74	751.83
												592.288	530.31	732.87	592.148	643.29	723.94
												592.906	512.99	688.9	592.768	631.53	695.67
												593.526	498.16	638.71	593.388	611.84	659.88
												594.147	486.51	596.41	594.009	592.02	624.79
												594.767	474.2	566.38	594.633	572.08	591.91
												595.388	464.82	537.22	595.252	553.34	564.52
												596.008	459.45	511.23	595.872	537.65	539.47
												596.628	457.14	491.64	596.493	523.04	516.09
												597.248	453.32	474.63	597.115	509.45	497.1
												597.868	453.78	461.1	597.732	498.67	479.82
												598.488	452.34	452.11	598.35	486.18	464.03
												599.108	455.16	451.01	598.972	478.91	449.52
												599.729	455.88	445.34	599.597	471.04	440.34
