# Supplementary material for: The gut contractile organoid for studying the gut motility regulated by coordinating signals between interstitial cells of Cajal and smooth muscles
Source: eLife. 2025 Aug 22;13:RP97860. doi: 10.7554/eLife.97860 (PMC12373395; doi:10.7554/eLife.97860)
Supplement: Figure 9—source data 1. [file elife-97860-fig9-data1.xlsx]

## Sheet: Fig9C-timelapse
Time [s]	#1 (EGFP)	#2 (EGFP)	#3 (EGFP)
0.27	392.26	275.92	276.12
0.97	392.18	276.21	276.13
1.67	392.62	275.76	277.44
2.37	392	277.02	276.42
3.07	392.04	276.38	277.49
3.77	392.24	274.98	276.61
4.468	392.15	276.41	277.21
5.17	392.99	277.12	279.57
5.87	393.2	277.15	278.09
6.568	390.82	275.75	277.62
7.27	392.24	275.83	278.09
7.968	392.3	275.44	276.97
8.67	389.27	278.41	277.45
9.37	434.4	288.66	276.21
10.07	471	298.95	291.06
10.768	495.23	309.85	307.25
11.47	510.74	316.21	324.43
12.168	522.57	322.02	337.2
12.87	520.71	326.53	347.44
13.568	521.51	328.16	352.92
14.268	513.79	330.9	359.41
14.968	492.26	327.23	359.83
15.668	468.85	321.44	355.33
16.368	451.47	311.95	346.91
17.068	441.35	304.45	341.2
17.77	436.43	300.86	334.9
18.468	431.55	300.24	329.04
19.17	429.22	297.61	323.48
19.868	425.32	295.69	321.23
20.568	424.09	292.55	316.25
21.268	424.29	292.16	314.09
21.968	422.09	288.98	310.6
22.668	421.62	289.38	310.92
23.37	420.56	288.19	307.75
24.068	417.99	287.06	306.75
24.768	418.65	287.88	303.54
25.468	415.91	285.85	302.45
26.17	416.2	286.11	300.85
26.87	417.25	284.97	300.31
27.568	413.64	284.39	297.42
28.268	414.25	283.57	298.35
28.968	415.03	283.83	296.68
29.67	413.17	282.76	295.79
30.37	412.19	281.87	293.39
31.068	409.61	282.1	293.57
31.768	411.94	282.06	293.64
32.468	411.37	279.96	295
33.168	410.7	280.2	293.23
33.868	410.36	282.15	292.32
34.568	411.89	279.96	291.28
35.268	409.2	280.03	292.13
35.97	408.48	279.25	289.04
36.668	407.13	278.16	289.83
37.368	408.66	279.85	291.12
38.068	408.32	278.61	289.04
38.768	406.4	276.82	288.77
39.468	408.67	278.32	288.13
40.168	408.69	278.01	289.24
40.868	407.96	277.45	288.43
41.568	406.26	277.52	288.38
42.268	405.74	277.6	289.1
42.969	409.05	279.19	289.07
43.669	408.38	274.88	288.04
44.369	405.76	276.09	286.06
45.069	405.66	275.31	287.61
45.771	407.61	276.74	288.26
46.469	407.23	275.55	285.24
47.171	405.12	275.93	287.13
47.869	407.27	275.41	287.61
48.569	406.73	275.44	288.19
49.271	406.91	276.22	286.22
49.969	407.38	275.58	287.06
50.669	430.53	283.7	281.34
51.369	476.13	292.44	293.55
52.069	497.58	301.06	311.8
52.769	516.7	311.06	327.46
53.469	525.53	317.36	341.22
54.169	531.65	321.11	351.37
54.869	522.92	322.43	359.14
55.569	516.35	324.8	365.45
56.269	494.58	317.35	364.77
56.969	474.75	310.38	359.02
57.669	460.12	301.45	354
58.369	450.12	300.16	346.95
59.069	445.03	296.33	339.09
59.769	442.96	294.32	335.8
60.469	440.27	292.67	332.78
61.169	438.61	290.31	328.92
61.869	437.02	291.1	325.62
62.569	434.71	289.73	322.23
63.269	433.87	288.42	319.07
63.969	434	287.13	318.91
64.669	432.1	284.93	314.25
65.371	430.76	286.54	313.62
66.069	430.12	286.12	312.7
66.769	427.91	283.54	309.25
67.469	429.89	282.34	309.49
68.169	428.26	282.23	308.28
68.869	427.72	284.63	306.23
69.569	428.95	281.62	306.32
70.269	450.44	287.93	299.61
70.969	486.6	294.19	312.01
71.669	496.03	297.12	325.18
72.371	487.23	299.68	331.76
73.069	506.31	303.61	336.84
73.769	506.94	303.13	345.25
74.469	482.96	294.85	344.57
75.169	463.37	292.71	340.15
75.869	453.44	290.13	335.67
76.567	449.76	288.07	332.37
77.269	444.94	286.75	328.61
77.967	442.76	285.5	326.12
78.669	440.41	286.57	323.03
79.369	439.9	285.66	320.49
80.069	438.3	286.62	319.26
80.769	437.78	283.48	317.64
81.469	436.47	283.6	315.15
82.169	434.67	281.56	312.32
82.869	434.88	283.27	313.26
83.569	433.76	281.5	309.9
84.269	435.98	280.21	308.76
84.969	433.31	279.98	309.07
85.669	432.02	281.56	307.92
86.369	432.69	279.88	308.13
87.069	431.15	279.61	306.25
87.769	431.07	280.22	305.42
88.469	429.82	279.13	302.71
89.169	430.09	279.76	302.94
89.869	429.46	279.57	304.05
90.569	429.28	277.98	301.7
91.269	426.84	277.56	301.85
91.969	426.52	276.55	301.2
92.669	427.09	276.17	299.52
93.369	426.83	275.63	302.23
94.069	427.66	277.52	300.62
94.769	429.29	281.5	295.91
95.469	477.11	289.82	299.37
96.169	498.2	296.32	313.41
96.869	510.19	304.15	325.71
97.569	526.54	311.29	339.29
98.267	527.19	314.68	349.09
98.969	532.84	319.02	358.45
99.669	522.13	318.6	366.33
100.367	499.23	315.36	366.1
101.07	498.6	312.73	363.77
101.767	499.93	305.37	364.58
102.47	483.74	302.06	360.79
103.17	470.94	296.11	352.62
103.87	463.92	294.57	348.78
104.57	459.16	293.53	345.43
105.267	456.42	292.15	340.51
105.97	454	290.48	336.18
106.67	450.5	289.64	332.95
107.37	449.89	289.05	331.18
108.068	448.34	287.3	326.23
108.77	448.01	286.97	324.1
109.47	446.81	286.83	321.5
110.17	445.19	285.08	322.87
110.868	447.02	284.9	318.77
111.57	444.9	285.87	318.5
112.27	444.58	285.27	318.27
112.97	443.42	284.08	314.28
113.67	441.48	282.18	313.37
114.37	441.29	281.73	311.95
115.07	439.57	281.58	309.56
115.77	439.75	282.41	311.73
116.47	439.92	279.75	309.42
117.168	438.14	281.4	307.98
117.87	439.59	281.2	308.75
118.57	438.9	280.68	307.36
119.27	438.61	280.14	305.99
119.968	437.73	277.87	304.34
120.668	438.35	280.34	306.2
121.37	438.07	276.78	305.17
122.068	436.65	278.87	304.23
122.768	434.15	277.15	302.63
123.47	434.66	278.22	302.88
124.168	436.07	278.32	302.3
124.868	433.98	279.15	301.3
125.568	434.05	279.64	301.03
126.268	455.21	284.12	296.69
126.968	493.83	291.25	305.69
127.67	502.85	295.33	318.94
128.368	520.49	303.88	329.2
129.07	531.28	307.27	341.86
129.768	534.09	313.78	351.91
130.468	536.74	313.82	360.11
131.17	514.75	310.2	363
131.87	492.25	304.38	360.76
132.57	473.47	297.8	354.93
133.268	466.77	294.57	350.82
133.97	469.12	294.72	344.94
134.668	477.55	293.5	341.33
135.37	474.68	292.58	344.15
136.07	467.8	291.47	340.47
136.77	460.97	290.57	340.07
137.47	455.6	287.25	335.19
138.17	456.51	287.04	331.05
138.87	452.64	287.33	332.12
139.568	452.36	283.73	326.69
140.268	450.64	283.83	324.32
140.97	450.11	285.13	321.81
141.67	446.88	284.65	320.12
142.37	446.96	280.94	318.59
143.068	444.35	281.08	317.47
143.768	444.6	282.42	316.98
144.47	443	279.64	314.03
145.168	443.61	280.2	310.76
145.868	441.43	279.26	309.74
146.568	441.02	280.97	310.22
147.27	441.83	282.3	306.77
147.968	443.2	288.23	307.39
148.668	439.92	291.37	311.88
149.37	441.84	289.37	318.54
150.068	440.04	283.34	321.2
150.768	439.39	282.16	317.12
151.468	471.62	287.43	311.65
152.168	502.78	294.07	318.34
152.868	517.6	299.33	329.64
153.57	531.48	302.98	337.62
154.27	528.65	301.21	346
154.968	523.12	301.99	347.5
155.668	531.56	300.44	350.24
156.368	517.59	296.43	356.02
157.068	493.56	292.41	353.25
157.768	478.61	288.42	346.67
158.47	473.19	287.6	343.15
159.168	468.59	288.1	339.53
159.868	463.86	285.88	336.59
160.569	461.9	285.86	335.96
161.268	458.85	284.45	332.29
161.968	457.31	285.97	328.43
162.668	457.58	284.33	328.11
163.368	455.91	284.22	326.29
164.069	455.9	281.63	323.22
164.768	454.15	282.2	323.5
165.469	453.52	282.28	320.38
166.169	452.17	281.23	319.32
166.869	452.33	281.91	317.81
167.571	451.11	280.31	316.74
168.269	449.91	280.68	314.18
168.969	450.67	279.97	314.8
169.669	448.87	279.88	315.57
170.371	447.87	279.48	312.7
171.069	448.9	278.19	313.2
171.769	448.08	281.79	308.2
172.469	489.96	287.44	309.47
173.169	505.95	293.32	323.56
173.87	509.79	299.09	330.16
174.57	528.15	303.86	341.76
175.27	525.25	303.68	349.03
175.97	519.13	306.29	354.06
176.67	521.51	303.38	359.07
177.37	501.95	296.78	361.06
178.07	482.33	295.17	356.88
178.77	474.36	289.35	352.2
179.47	467.68	288.5	346.69
180.17	465.12	286.08	344.03
180.87	461.88	284.67	336.88
181.568	459.76	285.29	336.17
182.27	458.29	283.15	334.09
182.97	457.54	282.76	330.73
183.668	457.22	283.64	328.63
184.368	456.15	282.94	326.34
185.07	454.57	283.23	324.89
185.768	454.43	282.12	323.32
186.468	453.43	281.87	323.65
187.168	452.99	280.79	320.08
187.868	452.34	281.08	319.03
188.568	451.41	279.17	318.2
189.27	451.47	279.12	316.43
189.968	449.62	277.78	315.62
190.668	450.33	279.6	316.61
191.368	450.49	278.52	314.8
192.068	447.3	278.77	312.81
192.77	447.67	281.29	313.04
193.47	479.67	284.28	307.98
194.17	503.77	293.09	319.99
194.87	509.5	297.41	328.07
195.568	525.85	301.97	339.32
196.27	522.18	306.04	350.67
196.968	527.39	307.81	356.27
197.67	520.35	301.14	363.85
198.368	495.24	295.36	364.83
199.068	479.07	293.54	359.42
199.77	471.05	288.23	352.7
200.468	466.53	286.96	349.25
201.168	463.9	286.61	343.87
201.87	462.75	286.58	340.17
202.568	460.2	283.34	336.16
203.27	458.5	283.38	334.31
203.968	456.81	283.26	332.81
204.67	457.25	285.19	332
205.368	455.32	283.86	325.88
206.068	453.51	280.3	326.19
206.768	455.46	281.74	322.44
207.468	452.63	280.78	322.16
208.168	453	281.78	322.22
208.868	454.34	280.37	320.06
209.568	451.09	278.37	320.39
210.27	448.24	280.04	320.06
210.968	449.9	283.53	315.41
211.67	484.43	287.52	311.37
212.368	501.8	292.6	323.67
213.068	493.73	290.43	331.88
213.77	504.26	295.88	334.39
214.468	510.9	297.15	342.91
215.17	488	288.25	347.73
215.868	472.55	288.45	344.5
216.568	466.4	285.52	341.57
217.268	460.52	283.49	338.05
217.968	460.75	285.13	336.5
218.67	457.25	284.01	331.87
219.37	455.43	283.02	331.26
220.068	455.04	279.94	329.56
220.77	452.02	280.5	328.6
221.468	451.16	279.51	323.54
222.168	453.21	281.87	323.77
222.868	451.24	280.14	323.48
223.569	451.34	279.3	321.67
224.268	447.62	277.59	319.08
224.97	448.04	278.53	319.81
225.669	450.07	278.65	316.37
226.369	448.98	278.51	316.84
227.069	448.95	278.6	315.74
227.771	448.72	277.02	315.83
228.497	446.98	277.12	313.24
229.169	445.8	274.3	313.21
229.869	446.35	276.38	313.82
230.569	445.83	276.86	312.75
231.271	444.65	277.28	311.52
231.969	445.78	277.38	311.18
232.669	444.22	276.49	308.97
233.369	467.3	282.34	304.11
234.069	498.55	286.52	311.85
234.771	507.1	291.67	324.26
235.469	518.18	296.86	330.82
236.169	530.23	301.77	343.66
236.869	531.91	306.28	350.98
237.569	530.83	305.96	357.6
238.269	510.43	299.72	364.33
238.969	495.34	295.04	358.61
239.669	503.21	292.95	359.39
240.369	489.49	290.53	358.2
241.069	477.49	288.26	354.86
241.769	471.74	285.66	350.21
242.469	466.13	285.59	344.74
243.169	463.4	284.94	340.15
243.869	462.3	285.41	339.91
244.569	460.93	281.77	336.12
245.269	458.82	281.68	333.24
245.969	459.49	280.53	332.45
246.669	457.77	282.33	330.6
247.369	456.27	281.24	328.47
248.069	456.77	281.25	326.61
248.769	457.27	280.5	325.43
249.469	455.58	280.46	323.53
250.169	452.73	280.51	323.84
250.869	454.01	278.21	319.32
251.569	453.02	278.81	321.31
252.269	452.91	277.76	318.89
252.969	452.27	279.11	314.98
253.669	493.42	285.65	313.37
254.369	506.11	287.9	324.25
255.069	496.22	289.69	330.63
255.769	504.5	292.82	331.42
256.469	516.81	294.56	340.42
257.169	494.61	287.87	343.12
257.871	479.81	285.89	342.94
258.569	468.17	284.74	340.8
259.269	463.56	282.5	336.55
259.969	461.52	281.74	335.63
260.669	459.88	282.1	331.43
261.369	458.29	279.68	328.58
262.069	460.02	279.81	326.33
262.771	457.47	279.5	324.85
263.471	456.1	279.12	322.47
264.169	453.7	279.18	323.17
264.867	453.46	278.62	321.31
265.569	453.59	277.59	319.84
266.269	453.6	277.39	318.2
266.969	453.37	279.23	318.26
267.669	454.25	277.68	317.62
268.369	453.11	277.55	318.43
269.069	451.8	278.01	315.75
269.769	451.83	277.43	315.28
270.469	450.38	274.98	313.84
271.169	450.55	277.01	312.41
271.869	448.37	276.93	313.27
272.569	450.4	275.8	311.3
273.269	449.97	276.85	311.28
273.969	450.46	275.2	312.23
274.669	449.77	275.43	311.13
275.369	447.31	276.33	310.27
276.069	446.4	273.74	310
276.769	448.29	275.04	310.41
277.469	444.89	276.28	307.42
278.169	466.3	277.87	302.35
278.869	502.97	284.01	311.15
279.569	506.39	284.37	322.16
280.269	520.3	291.41	327.27
280.969	527.5	294.43	338.45
281.669	520.28	295.35	343.59
282.369	525.69	294.49	348.97
283.07	503.78	290.05	353.33
283.769	485.52	288.34	352.16
284.472	476.71	285.18	349.11
285.169	468.23	282.56	343.65
285.867	465.9	281.66	340.49
286.568	464.97	281.42	337.5
287.268	460.66	278.94	333.08
287.968	461.01	278.78	331.31
288.668	459.69	279.16	328.52
289.368	458.91	278.71	326.62
290.068	456.69	277.7	324.5
290.77	454.48	277.08	325.63
291.47	457.5	277.04	322.91
292.17	454.86	277.83	322.05
292.87	454.72	275.05	321.22
293.57	455.15	279.84	320.78
294.27	473.74	281.18	314.04
294.97	502.13	284.13	320.99
295.67	499.35	283.86	329.1
296.37	479.09	285.16	329.71
297.07	497.63	284.46	330.49
297.77	507.66	285.12	337.79
298.47	484.87	282.54	339.99
299.17	470.76	279.91	338.06
299.87	466.36	279.22	337.89

## Sheet: Fig9G-timelapse
Time [s]	#1 (EGFP)	#2 (EGFP)	#3 (EGFP)
0.068	218.53	166.39	165.45
0.768	217.02	165.61	163.67
1.468	215.51	164.85	164.59
2.168	214.56	162.58	164.43
2.868	213.24	161.45	163.35
3.568	211.2	161.91	163.59
4.268	210.08	161.53	162.1
4.968	207.03	160.21	160.71
5.668	206.68	159.65	161.05
6.368	205.15	157.88	161.78
7.068	206.58	158.19	162.59
7.768	204.82	159.07	161.98
8.464	205.72	158.67	160.87
9.169	202.47	156.29	158.22
9.869	203.48	156.3	159.62
10.568	203.11	156.03	160.11
11.271	203.09	156.19	159.51
11.969	204.09	156.63	160.15
12.669	203.5	156.18	160.72
13.369	203.19	154.44	160.54
14.069	205.98	155.2	160.03
14.767	209.41	157.2	160.83
15.469	209.26	156.5	160.4
16.169	210.06	156.72	160.11
16.869	209.26	156.97	160.97
17.569	210	157.12	162.29
18.269	211.77	158.19	165.86
18.963	214.36	159.65	164.9
19.669	213.44	159.03	164.79
20.369	220.49	160.04	168.86
21.069	221.73	161.31	169.06
21.769	220.09	160.38	165.12
22.469	219.19	159.93	165.68
23.169	220.71	162.4	168.91
23.869	226.16	163.63	169.63
24.569	228.44	165.06	167.63
25.269	230.85	168.75	174.66
25.965	234.53	168.62	173.85
26.669	243.46	190.02	317.18
27.369	300.47	220.7	413.78
28.069	310.97	229.84	409.21
28.769	319.87	245.58	431.1
29.465	324.03	251.56	447.85
30.169	316.6	249.43	403.78
30.869	316.75	255.81	403.98
31.567	316.13	250.02	358.84
32.267	312.48	254.3	381.46
32.967	315.76	255.94	358.41
33.669	301.87	246.1	304.28
34.367	285.65	233.11	261.89
35.067	268.15	217.09	230.4
35.769	251.44	207.29	206.69
36.463	240.04	199.5	191.8
37.167	230.29	192.86	182.81
37.869	221.57	190.37	177.72
38.567	217.81	183.18	171.34
39.269	213.86	180.06	168.48
39.969	210.54	176.72	166.11
40.669	208.76	174.54	165.55
41.367	207.27	172.47	164.66
42.067	205.36	168.98	163.57
42.769	204.74	165.76	162.52
43.467	204.37	164.3	162.17
44.169	202.59	164.43	162.12
44.867	202.85	163.11	162.38
45.569	203.99	161.55	161.78
46.269	202.67	159.58	162
46.969	203.29	159.32	163.02
47.669	202.67	157.2	162.5
48.369	203.4	157.95	163.1
49.069	202.15	158.58	161.13
49.769	201.27	158.35	163.65
50.469	201.6	158.47	162.79
51.169	204.14	158.29	162.95
51.869	205.16	160.09	163.71
52.567	204.57	157.59	163.52
53.269	205.78	157.84	163.51
53.967	207.29	156.8	163.2
54.667	206.46	157.43	164.48
55.367	206.49	155.99	164.08
56.067	205.06	156.84	164.92
56.767	207.35	157.54	173.41
57.463	214.12	158.84	171.75
58.167	214.82	159.32	169.65
58.867	213.8	159.12	167.77
59.567	213.14	159.06	169.77
60.267	216.93	159.22	172.35
60.967	216.78	158.59	167.5
61.667	212.26	158.92	165.14
62.367	210.54	157.54	165.26
63.067	208.75	156.78	163.7
63.767	209.41	157.72	165.56
64.467	208.76	156.91	164.03
65.167	211.25	158.86	164.76
65.869	212.89	159.19	165.02
66.567	214.26	156.53	164.38
67.269	211.38	155.01	163.54
67.967	209.48	156.07	164.67
68.667	208.58	156.65	163.27
69.367	209.46	156.83	164.65
70.067	207.87	157.04	163.02
70.77	209.67	156.07	162.96
71.467	210.58	156.09	162.07
72.17	211.2	156.56	165.24
72.87	212.29	156.67	164.74
73.567	211.22	156.68	164.69
74.268	212.14	156	162.42
74.968	210.34	156.32	165.02
75.668	212.63	158.23	166.2
76.368	215.4	157.9	166.01
77.068	215.25	157.8	164.83
77.77	215.46	157.43	164.92
78.464	214.76	156.57	168.97
79.168	224.9	162.11	179.52
79.868	237.2	167.57	186.89
80.568	242.16	167.64	183.98
81.27	242.88	173.18	195.99
81.968	267.1	188.51	234.1
82.668	291.24	206.36	313.95
83.368	314.21	222.79	414.23
84.068	312.64	222.04	398.19
84.768	313.83	227.42	399.24
85.468	315.98	236.47	414.49
86.168	313.86	241.64	399.11
86.87	304.39	234.05	344.53
87.568	292.36	226.82	297.26
88.27	279.72	216.33	259.87
88.966	264.45	205.19	227.19
89.668	250.16	197.71	203.42
90.368	238.2	194.02	189.42
91.068	228.67	188.26	180.94
91.77	221.97	182.14	175.2
92.47	216.11	179.36	169.92
93.168	213.55	176.82	169.32
93.868	210.34	173.19	166.22
94.568	206.3	171.59	164.85
95.27	203.9	168.16	163.14
95.968	203.01	167.58	162.17
96.668	201.91	164.51	161.02
97.368	201.95	163.96	163.07
98.07	201.57	162.15	161.2
98.768	199.67	161.43	161.54
99.464	200.35	159.53	161.05
100.168	200.79	160.1	162.08
100.868	201.85	158.74	161.71
101.568	202.23	157.33	160.25
102.268	202.62	157.79	160.8
102.964	203.55	157	160.91
103.668	203.12	156.35	159.61
104.368	203.01	157.4	162.89
105.068	205.17	156.64	164.03
105.768	204.84	157.04	162.48
106.468	203.67	157.76	162.97
107.168	203.06	159.06	163.74
107.868	207.22	159.26	165.38
108.568	207.02	158.36	164.45
109.268	204.93	157.2	163.19
109.968	206.15	157.11	164.14
110.668	204.87	157.35	166.21
111.37	208.12	159.37	167.27
112.07	209.62	161.79	168.52
112.768	215.93	162.48	173.2
113.464	220.47	163.68	171.14
114.168	220.08	161.97	168.52
114.868	217.07	161.16	166.14
115.568	215.86	161.89	171.58
116.268	219.26	162.27	172.27
116.968	218.42	163.77	170.51
117.668	216.21	163.39	168.85
118.368	215.47	162.94	168.61
119.068	213.56	162.8	166.25
119.768	214.1	163.38	166.95
120.468	213.63	163.6	164.52
121.168	213.04	163.27	163.54
121.868	214.3	165.31	169.79
122.568	214.52	164.34	167.16
123.268	214.77	163.32	168.09
123.968	216.14	163.01	166.79
124.668	215.98	163.57	171.06
125.368	221.61	167.64	171.33
126.068	227.8	172.56	176.09
126.768	232.32	174.27	176.99
127.468	230.06	171.87	180.12
128.169	240.49	177.63	186.74
128.868	241.29	173.68	179.66
129.568	235.5	171.13	174.12
130.269	227.99	168.66	170.46
130.968	227.39	167.37	167.57
131.668	220.18	167.12	166.99
132.368	219.26	166.46	165.3
133.069	215.4	165.58	166.76
133.769	215.35	165.82	164.98
134.469	214.05	167.69	172.1
135.169	222.1	169.78	175.57
135.871	221.21	169.82	172.33
136.563	219.86	168.27	169.11
137.265	220.63	165.37	167.82
137.967	217.6	165.61	165.97
138.669	215.8	163.64	165.06
139.367	211.97	161.53	162.52
140.069	210.19	161.43	163.52
140.769	209.87	160.68	162.09
141.469	211.04	159.72	162.56
142.169	209.55	159.74	163.54
142.869	213.96	162.29	164.81
143.569	213.55	162.83	166.3
144.269	213.39	162.63	166.53
144.969	213.89	162.09	164.49
145.669	214.67	163.68	170.89
146.369	223.66	166.99	176.31
147.069	227.59	169	179.27
147.769	229.44	169.38	178.36
148.469	227.89	166.81	174.15
149.169	233.16	170.69	193.12
149.869	271.4	205.77	375.54
150.569	301.38	223.01	421.61
151.269	302.92	225.47	391.42
151.969	307.84	237.62	440.08
152.669	314.56	246.16	430.92
153.369	317.59	257.24	446.6
154.069	315.86	256.39	405.23
154.769	312.16	257.89	397.18
155.465	308.72	254.15	353.16
156.169	294.95	247.17	305.97
156.869	281.25	235.6	261.81
157.569	263.8	223	229.03
158.269	249.58	211.85	206.83
158.967	234.63	205.61	191.25
159.669	227.34	199.74	183.75
160.367	219.35	195.01	175.59
161.069	213.37	189.77	172.38
161.767	211.3	185.8	167.77
162.467	208.79	181.62	166.6
163.167	204.91	177.8	164.02
163.867	203.33	174.11	162.95
164.567	201.5	172.1	162.4
165.269	202.77	169.1	161.86
165.969	204.04	167.79	161.97
166.667	203.5	167.1	161.95
167.368	203.72	164.72	162.06
168.068	205.62	164.01	162.65
168.77	206.36	162.84	162.48
169.468	205.83	161.57	164.04
170.168	208.23	161.65	165.48
170.868	218.17	167.56	172.25
171.568	234.47	173.52	185.73
172.268	260.87	193.47	268.96
172.968	278.12	201.68	284.91
173.668	276.88	201.28	259.9
174.368	272.73	206.44	235.75
175.068	265.93	202.13	216.05
175.768	255.27	191.56	201.25
176.468	244.22	184.48	187.99
177.168	232.86	176.48	178.31
177.868	225.41	173.27	173.4
178.568	219.74	169.34	170.33
179.268	215.3	167.74	167.11
179.968	213.48	165.32	164.59
180.668	210.75	163.46	162.71
181.368	208.31	162.79	161.61
182.068	207.72	162.88	162.36
182.768	203.92	161.14	161.14
183.468	203.36	162.16	162
184.168	202.37	160.91	161.17
184.868	200.59	159.06	160.54
185.568	201.38	160.27	163
186.268	201.49	159.55	162.43
186.967	202.32	158.33	162.12
187.667	201.89	158.28	162.19
188.367	201.73	156.11	161.59
189.067	202.95	156.44	162.69
189.767	202.99	155.81	162.32
190.467	206.26	158.07	163.21
191.17	203.55	156.22	162.55
191.867	202.65	158.62	163.45
192.569	207.98	161.95	163.76
193.27	208.95	159.05	162.78
193.97	206.4	159.06	163.08
194.67	206.1	158.92	165.17
195.37	205.24	158.93	164.46
196.07	204.43	157.67	164.94
196.77	204.23	158.95	163.74
197.47	204.52	159.45	165.88
198.168	206.58	159.34	168.12
198.87	210.88	159.4	167.49
199.568	210.03	160.16	165.64
200.27	209.27	158.3	163.85
200.968	210.5	160.18	164.15
201.668	208.31	158.09	162.07
202.368	208.07	158.74	162.78
203.068	208.29	159.05	162.03
203.768	207.45	157.3	163.25
204.468	210.02	161.69	165.03
205.168	211.63	161.73	166.94
205.87	215.4	162.96	170.07
206.568	218.22	165.17	173.7
207.268	238.24	177.92	203.44
207.964	251.98	182.23	201.95
208.668	257.67	182.73	202.77
209.368	252.78	179.8	195.54
210.068	266.22	192.93	246.19
210.77	287.88	207.52	281.72
211.468	299.96	222.78	374.87
212.168	299.39	221.02	353.07
212.868	296.35	227.08	345.95
213.57	293.61	229.57	319.5
214.27	288.34	224.91	289.99
214.97	270.49	211.65	246.88
215.668	258.85	203.97	221.51
216.368	246.54	194.09	199.82
217.07	232.89	186.55	184.9
217.77	223.93	180.71	176.18
218.464	218.94	177.1	171.12
219.168	212.49	174.39	166.42
219.868	209.21	173.28	165.34
220.568	207.35	169.65	163.36
221.268	204.44	167.18	162.72
221.968	205.5	166.32	161.7
222.668	203.52	163.43	160.75
223.368	199.59	161.95	159.79
224.068	198.81	160.87	159.69
224.768	198.57	159.79	160.04
225.469	198.24	159.65	158.32
226.167	199.08	163.71	159.94
226.869	200.29	166.3	158.87
227.567	201.73	164.08	159.03
228.269	202	162.23	160.55
228.965	202.76	162.2	162.48
229.669	199.93	160.97	160.83
230.373	200.2	159.91	161.51
231.075	199.51	158.33	160.77
231.769	200.1	160.8	161.07
232.469	206.71	162.02	173.21
233.169	214.59	165.99	171.51
233.867	212.85	163.03	168.69
234.569	211.76	163.17	166.5
235.269	210.07	163.46	166.07
235.969	212.65	164.61	168.43
236.669	212.69	166.39	168.64
237.369	212.82	165.98	167.86
238.069	214.16	166	166.83
238.768	218.06	169.3	175.86
239.469	221.01	168.7	173.12
240.169	222.81	170.84	179.75
240.869	226.08	170.23	179.14
241.567	228.91	170.83	180.58
242.267	227.85	171.3	177.15
242.967	226.66	169.28	173.28
243.667	223.15	168.88	171.8
244.367	223.94	168.85	171.34
245.067	222.47	168.07	174.21
245.767	221.99	165.55	169.63
246.469	217.49	166.33	168.47
247.167	216.48	164.66	166.58
247.867	214.24	166.41	174.85
248.568	216.04	166.23	170.45
249.268	216.09	167.23	178.05
249.968	219.98	169.97	176.08
250.668	216.86	165.56	168.52
251.368	213.78	164.43	165.31
252.068	215.26	164.3	169.63
252.768	216.18	165.47	167.54
253.469	216.53	165.9	166.56
254.169	216.55	164.64	164.06
254.868	211.91	163.59	163.91
255.569	213.52	163.21	164.63
256.269	211.27	163.45	164.6
256.965	210.55	163.86	162.83
257.669	207.91	163.81	161.9
258.371	205.6	164.06	161.67
259.068	205.47	164.32	162.27
259.77	207.82	164.58	164.24
260.468	208.44	166.45	167.3
261.17	210.35	166.05	166.55
261.868	209.75	166.23	166.28
262.568	213.47	170.32	171.93
263.268	216.12	172.34	173.68
263.968	228.22	178.1	186.14
264.668	235.43	181.14	194.23
265.368	242.17	182.56	198.79
266.068	241.77	180.96	201.67
266.768	263.38	199.4	269.53
267.468	284.78	215.6	336.66
268.168	294.85	228.03	390.26
268.868	297.29	230.66	377.56
269.568	301.78	243.01	383.02
270.268	297.25	245.45	344.92
270.968	288.5	236.35	305.25
271.668	274.62	228.24	262.36
272.368	262.49	215.93	226.84
273.068	248.47	206.09	204.57
273.768	237.2	198.55	188.02
274.47	228.2	191.96	177.51
275.168	219.14	188.65	169.45
275.87	215.05	183.92	166.4
276.57	210.28	181.47	163.08
277.27	207.24	176.85	161.75
277.968	204.35	173.61	160.76
278.668	203.07	171.2	160.14
279.368	201.83	169.16	159.62
280.068	199.73	168.15	158.76
280.77	198.16	166.12	158.32
281.468	200.57	165.5	159.67
282.17	198.09	163.21	157.57
282.868	198.82	163.1	158.32
283.568	197.73	160.78	158.27
284.267	197.65	159.56	157.73
284.969	197.92	160.03	157.34
285.669	199.48	158.83	159.39
286.367	198.88	158.78	159.78
287.067	199.38	159.48	159.79
287.769	200.43	159.18	160.59
288.463	201.07	159.34	160
289.167	203.95	161.9	162.79
289.869	205.45	161.4	162.24
290.569	205.48	162.19	162.99
291.269	206.39	162.99	165.57
291.963	206.84	161.94	165.79
292.669	208.41	162.25	170.63
293.367	208.74	162.39	167.24
294.069	206.87	161.7	163.85
294.769	206.29	160.64	163.89
295.469	207.71	159.46	162.18
296.169	207.72	158.78	161.02
296.869	206.98	158.41	161.78
297.569	207	158.8	160.49
298.269	206.43	161.25	161.97
298.969	210.38	161.83	164.67
299.669	210.59	162.76	163.51
300.369	210.54	162.33	163.33

## Sheet: Fig9H-timelapse
Before				18b-GA20uM
Time [s]	#1 (EGFP)	#2 (EGFP)	#3 (EGFP)	Time [s]	#1 (EGFP)	#2 (EGFP)	#3 (EGFP)
0.065	332.13	230.15	201.4	0	248.91	191.98	176.07
1.247	328.82	229.98	201.21	1.168	245.02	192.83	174.14
2.415	326.44	229.31	200.3	2.338	246.05	192	175.27
3.583	323.48	228.32	200.54	3.506	245.8	192.54	177.81
4.751	321.21	229.64	199.85	4.676	243	191.77	177
5.919	321.86	228.31	200.96	5.844	243.82	189.81	175.2
7.089	320.89	228.12	200.11	7.012	245.66	193.56	178.06
8.257	321.87	226.97	199.51	8.18	244.81	192.58	176.92
9.425	322.77	228.24	202.16	9.348	244.3	193.99	178.29
10.593	327.93	231.29	203.24	10.518	244.85	192.04	177.29
11.761	332.84	228.04	201.09	11.686	240.92	193.01	177.41
12.929	332.88	229.3	201.32	12.856	243.88	195.63	177.52
14.097	338.33	230.64	202.94	14.026	243.79	198.19	176.04
15.265	344.44	237.63	209.08	15.194	242.95	198	175.97
16.435	342.84	232.91	211.26	16.362	241.61	198.06	176.26
17.603	340.91	234.13	212.33	17.53	241.68	200.3	174.48
18.773	337.47	228.64	212.1	18.698	243.21	203.36	175.85
19.942	338.46	228.25	209.19	19.866	243.49	204.23	175.78
21.11	336.61	226.41	209.47	21.034	242.95	205.29	174.55
22.278	337.16	227.66	208.75	22.202	241.94	206.84	173.76
23.447	334.94	226.55	207.42	23.37	243	208.01	171.95
24.616	333.49	229.42	206.69	24.538	241.42	208.02	170.43
25.786	333.33	225.67	206.81	25.706	243.3	209.29	173.6
26.954	332.43	227.54	205.16	26.874	241.24	208.57	171.28
28.122	333.11	227.75	206.2	28.042	242.56	209.23	172.77
29.29	333.59	229.58	205.25	29.21	244.38	210.05	172.22
30.458	331.35	232.22	205.37	30.38	245.16	207.76	171.7
31.626	329.4	236.33	204.28	31.548	244.19	211.72	171.51
32.794	328.86	235.91	202.53	32.716	245.4	209.14	172.34
33.962	329.39	236.54	203.99	33.884	246.6	211.07	170.29
35.132	330.57	239.59	202.61	35.052	244.01	213.67	171.07
36.3	327.21	242.68	204.24	36.22	241.73	214.98	173.66
37.468	325.84	245.4	205.14	37.388	242.09	215.84	176.89
38.636	323.81	243.5	204.64	38.556	246.63	216.6	178.3
39.804	326.96	239.15	204.48	39.724	248.24	216.74	177.9
40.972	330.1	239.47	201.96	40.894	243.59	218.13	173.93
42.14	332.77	242.71	203.96	42.064	241.66	215.67	175.52
43.308	330.43	239.91	204.61	43.232	242.84	214.63	172.78
44.478	332.07	241.75	207.13	44.4	244.49	211.68	172.88
45.644	335.1	240.65	209.63	45.568	245.06	213.36	175.04
46.812	335.12	243.22	213.17	46.736	245.25	210.43	173.39
47.98	339.3	245.23	214.71	47.904	241.34	207.88	173.22
49.148	343.3	246.88	214	49.073	241.71	205.59	176.78
50.316	342.96	238.94	211	50.243	248.76	208.71	176.13
51.484	342.77	237.05	210.49	51.411	247.61	210.32	176.15
52.652	343.91	237.72	214.12	52.579	243.98	203.61	173.95
53.82	347.91	236.53	212.75	53.747	241.96	202.89	176.65
54.988	343.37	233.94	211.44	54.915	242.7	197.99	179.83
56.156	344.52	233.61	211.09	56.083	247.21	197.81	181.32
57.324	344.65	233.21	207.92	57.251	248.11	198.89	179.87
58.492	347.55	234.7	208.56	58.419	244.27	197.33	175.39
59.66	352.69	303.76	238.92	59.587	242.14	206.13	180.51
60.828	641.98	426.69	298.14	60.755	453.04	342.06	239.05
61.996	745.37	469.08	308.63	61.923	565.92	394.46	268.16
63.164	797.35	559.94	326.68	63.093	587.73	404.6	285.75
64.332	723.08	513.82	308.17	64.261	599.01	372.26	279.77
65.5	636.35	456.9	287.21	65.429	463.16	316.48	249.36
66.668	561.18	418.44	265.83	66.597	381.15	280.37	223.95
67.836	508.92	379.22	250.57	67.765	338.1	258.87	210.28
69.004	466.79	352.46	237.6	68.933	307.51	238.54	199.94
70.172	435.74	325.05	227	70.101	285.8	222.8	190.98
71.34	417.77	301.95	222.42	71.269	277.11	213.5	185.46
72.508	402.35	284.92	214.63	72.437	267.59	204.28	181.43
73.676	386.53	269.48	210.62	73.605	262.89	198.63	178.11
74.844	379.22	256.61	208.53	74.773	257.91	190.56	173.73
76.012	372.46	244.41	210.16	75.943	254.96	187.64	171.95
77.18	370.32	237.48	208.35	77.111	251.9	185.76	173.33
78.348	361.7	234.96	204.05	78.279	250.22	185.59	171.83
79.516	357.5	233.73	205.58	79.447	249.81	186.08	171.04
80.685	358.62	232.11	204.09	80.615	248.74	185.45	170.57
81.852	357.64	230.27	202.86	81.783	247.55	183.89	169.57
83.021	359.64	229.28	203.22	82.951	248.16	183.89	170.87
84.189	355.18	229.3	201.11	84.119	246.26	185.28	174.7
85.357	350.77	229.11	200.05	85.287	246.09	184.72	171.25
86.525	347.43	229.66	199.4	86.455	247.82	185.19	172.68
87.693	346.83	229.29	197.79	87.623	247.4	187.43	174.61
88.863	348.04	229.11	199.09	88.791	247.68	186.41	178.35
90.031	351.48	228.05	200.19	89.959	247.56	187.56	175.06
91.199	354.88	231.62	200.75	91.127	244.95	185.17	175.7
92.367	358.5	230.15	200.57	92.295	244.55	185.63	172.68
93.535	355.96	230.33	198.39	93.463	247.82	187.48	176.61
94.705	359.15	230.73	200.73	94.631	245.42	187.38	174.66
95.873	358.6	236.29	199.44	95.799	245.86	187.16	175.45
97.041	361.89	237.2	200.31	96.967	245.68	187.26	173.96
98.211	364.54	236.78	202.43	98.135	244.29	188.86	175.41
99.379	365.76	235.74	201.76	99.303	244.27	186.55	175.53
100.547	363.6	235.85	204.01	100.471	246.67	186.05	175.9
101.715	368.61	236.56	205.04	101.639	244.74	187.2	174.98
102.883	368.08	242.57	205.38	102.807	244.4	187.15	175.75
104.051	367.69	244.83	202.84	103.977	243.51	186.54	176.18
105.219	365.87	244.73	202.4	105.145	243.06	187.1	177.44
106.387	363.98	240.44	201.87	106.313	242.29	188.07	178.24
107.555	361.73	237.56	200.29	107.481	244.8	187.13	176.66
108.723	362.33	240.32	200.29	108.649	244.71	188.24	177.47
109.891	363.03	237.96	201.3	109.817	243.72	186.99	174.18
111.057	358.71	244.14	200.8	110.986	241.98	186.16	169.93
112.225	363.25	242.97	200.61	112.156	244.35	187.64	173.8
113.393	361.56	236.85	200.14	113.324	244.59	187.91	173.77
114.561	360.49	235.97	200.27	114.492	245.85	187.78	172.03
115.729	361.63	235.62	199.38	115.66	244.57	188.44	173.47
116.899	364.7	239.35	200.31	116.828	243.99	189.12	177.39
118.067	365.27	238.04	200.59	117.996	248.71	190.56	177.43
119.235	365.2	234.81	199.04	119.164	250.54	188.7	176.13
120.403	362.58	231.18	200.35	120.334	250.37	189	176.27
121.571	358.72	232.42	198.93	121.502	277.97	253.74	219.98
122.739	358.65	233.87	198.69	122.67	501.31	321.37	253.35
123.907	363.67	236.76	206.06	123.84	463.84	347.03	265.83
125.075	375.5	245.7	204.33	125.008	367.09	299.14	252.34
126.243	370.4	243.85	206.22	126.176	317.8	258.65	225.1
127.411	369.12	247.19	205.7	127.344	297.98	237.12	205.53
128.579	366.15	247.45	206.32	128.512	286.56	222.08	194.14
129.747	366.1	242.8	205.39	129.68	278.93	212.43	189.2
130.915	364.16	243.62	202.88	130.85	272.88	204.38	182.23
132.083	360.01	250.94	202.91	132.02	269.63	198.83	180.43
133.251	399.84	346.94	249.87	133.188	264.56	192.89	177.73
134.419	662.4	392.24	274.87	134.356	260.05	191.26	178.02
135.589	732.19	445.72	301.7	135.524	260.24	188.47	178.57
136.757	835.92	443.58	315.53	136.692	258.28	187.26	176.83
137.925	788.36	395.66	300.2	137.86	256.71	184.9	175.04
139.093	685.2	356.24	280.5	139.03	258.58	186.43	179.12
140.261	598.43	325.56	259.84	140.198	258.51	190.09	179.21
141.429	543.52	306.13	242.78	141.368	259.13	186.28	180.96
142.598	504.06	288.1	229.2	142.536	261	188.42	178.97
143.768	474.47	276.42	222.07	143.704	258.93	187.23	180.21
144.936	445.97	265.21	213.68	144.874	261.1	188.35	180.65
146.104	425.06	250.28	209.62	146.042	256.63	187.48	178.87
147.274	404.58	244.95	205.98	147.21	259	187.6	177.64
148.444	392.37	242.94	202.24	148.378	256.6	185.59	176.35
149.612	379.96	237.34	203.4	149.548	253.17	186.73	176.46
150.78	370.41	237.32	202.52	150.718	253.34	185.58	176.16
151.948	363.78	235.16	198.24	151.886	251.81	186.19	176.96
153.116	357.95	235.2	195.33	153.054	254.41	188.37	177.42
154.284	354.42	233.23	195.78	154.222	254.17	186.83	175.79
155.452	349.95	230.92	197.13	155.392	252.12	188.39	175.82
156.62	349.99	235.04	197.06	156.56	251.55	185.21	174.66
157.79	347.67	231.42	198.41	157.728	252.7	188.5	174.95
158.96	348.84	234.16	195.06	158.896	252.63	187.77	175.3
160.13	351.64	230.67	195.43	160.064	250.96	187.04	174.15
161.298	348.45	231.91	196.86	161.232	252.8	188.78	174.43
162.466	346.56	235.06	196.9	162.4	252.28	187.73	172.95
163.642	345.96	236.31	194.27	163.568	252.8	186.6	174.62
164.81	350.27	238.48	199.38	164.736	251.42	188.66	172.88
165.978	352.77	245.66	196.96	165.904	253.7	188.84	174.97
167.152	351.32	245.51	198.37	167.074	252.77	188.88	173.35
168.32	348.34	246.52	198.74	168.242	254.47	193.26	175.52
169.49	349.22	243.09	195.83	169.41	255.92	191.66	179.22
170.658	350.41	241.32	198.33	170.578	254.27	191.43	177.56
171.826	347.33	240.73	198.16	171.746	256.11	191.15	176.89
172.994	348.32	239.11	197.37	172.914	254.32	189.92	173.95
174.162	347.12	238.08	194.84	174.085	250.47	188.37	173.93
175.33	346.87	234.87	196.75	175.253	254.13	188.55	176.12
176.498	347.12	239.39	199.45	176.423	251.38	187.79	178.81
177.666	348.72	244.59	198.19	177.593	256.15	189.6	180.83
178.834	349.5	239.62	196.2	178.761	256.8	190.95	175.33
180.004	346.95	240.49	197.5	179.929	252.69	189.27	178.17
181.172	349.24	236.31	195.92	181.097	252.84	188.84	176.82
182.34	346.92	236.08	195.34	182.265	251.38	189.66	174.35
183.508	349.65	237.8	196.29	183.435	251.59	190.86	177.5
184.676	347.42	238.08	196.35	184.605	250.73	191.53	175.54
185.844	350.4	238.18	197.11	185.775	250.41	187.91	174.09
187.012	355.73	233.99	197.45	186.943	250.73	188.68	176.23
188.18	356.61	234.27	196.66	188.111	251.66	191.59	176.33
189.35	359.4	235.84	196.22	189.279	250.13	188.1	174.59
190.518	362.97	236.49	196.41	190.447	251.11	190.25	175.13
191.686	365.53	238.63	197.55	191.615	248.65	190.66	175.28
192.854	371.38	248.09	197.06	192.785	252.42	191.69	176.63
194.022	373.82	246.92	197.24	193.955	252.88	189.66	176.19
195.19	372.43	244.83	198.69	195.125	251.86	189.95	175.34
196.358	372.56	245.2	197.65	196.295	251.11	188.49	175.85
197.526	375.27	244.66	198.97	197.463	253.06	190.62	175.12
198.696	378.18	244.4	200.17	198.631	250.22	190.55	177.04
199.866	393.89	250.94	201.7	199.799	252.9	189.38	177.73
201.034	391	244.42	200.01	200.969	250.1	189.59	177.84
202.203	388.5	242.09	201.38	202.137	249.71	189.61	177.03
203.371	386.63	241.38	201.8	203.307	248.72	188.31	177.34
204.541	381.86	245.89	203.96	204.475	247.39	188.2	177.41
205.708	374.19	245.67	200.54	205.643	247.45	190.39	177.98
206.876	371.99	242.65	203.55	206.811	249.57	189.83	177.67
208.045	372.98	240.45	202.13	207.979	250.11	189.5	175.12
209.213	372.87	235.99	203.42	209.147	247.03	190.24	177.19
210.381	371.92	236.52	199.12	210.315	247.54	190.09	177.39
211.549	372.15	238.09	204.75	211.483	248.99	190.81	176.78
212.717	368.99	237.23	200.1	212.651	248.33	192.92	197.99
213.885	368.68	236.85	201.73	213.821	451.94	327.14	253.6
215.053	368.26	237.71	199.64	214.989	475.72	368.81	270.53
216.221	370.12	238.15	200.05	216.157	494.8	406.12	285.85
217.389	367.19	233.68	199.3	217.325	580.91	403.8	281.02
218.557	378.04	263.25	219.57	218.493	475.85	345.24	251.35
219.725	648.06	392.51	280.23	219.661	388.53	298.7	228.94
220.893	775.67	459.67	301.05	220.829	342.36	270.93	212.48
222.061	834.27	471.66	314.89	221.997	314.53	254.85	200.17
223.229	861.89	480.38	309.79	223.167	298.22	238.41	192.92
224.397	849.16	490.06	296.94	224.335	286.61	225.95	188.44
225.565	775.78	451.63	276.61	225.503	278.77	216.5	186.2
226.733	666.95	416.28	260.43	226.673	272.38	204.94	184.29
227.901	585.48	389.25	247.8	227.841	269.14	201.43	180.74
229.069	533.87	357.46	237.96	229.009	265.48	196.25	181.08
230.237	489.56	327.66	228.04	230.177	263.29	193.6	179.72
231.405	453.19	299.37	221.26	231.345	262.99	191.44	180.77
232.573	430.79	286.29	209.95	232.515	261.64	192.32	182.73
233.741	413.26	269.75	205.76	233.683	260.82	189.14	181.76
234.909	393.88	258.49	200.92	234.851	260.64	188.03	178.86
236.077	381.85	251.09	202.91	236.021	256.37	186.89	176.98
237.245	371.68	245.1	196.15	237.189	258.87	188.2	179.35
238.413	367.17	240.55	194.3	238.358	259.91	188.89	181.37
239.581	360.47	236.03	194.37	239.526	255.83	188.92	177.99
240.749	355.88	233.83	192.13	240.696	259.22	189.08	179.63
241.917	351.83	238.59	193.48	241.864	259.1	186.83	177.22
243.085	351.74	233.74	191.4	243.032	258.59	189.42	178.92
244.253	353.49	231.13	191.63	244.2	256.72	188.33	176.59
245.427	352.65	229.75	193.98	245.368	256.09	190.41	176.21
246.595	352.1	228.57	191.59	246.536	255.49	190.08	177.81
247.763	350.65	230.67	192.11	247.704	256.48	189.96	178.2
248.931	346.26	229.3	191.38	248.872	255.13	190.29	175.19
250.099	343.77	229.84	192.71	250.04	256.4	190.68	176.64
251.269	345.57	225.63	193.22	251.208	257.53	190.36	178.28
252.437	342.34	217.98	193.37	252.376	258.21	192.11	176.21
253.609	343.84	215.14	192.15	253.544	256.43	190.41	176.64
254.777	343	219.51	191.11	254.712	256.34	191.18	175.5
255.945	343.33	221.64	191.69	255.882	255.86	192	176.02
257.113	346.59	222.39	191.54	257.05	253.68	191.47	176.96
258.283	347.94	226.4	191.12	258.218	253.6	193.09	176.41
259.451	346.44	226.08	192.86	259.386	254.12	189.45	176.02
260.621	344.59	224.98	191.5	260.554	253.92	190.57	177.05
261.791	349.76	223.52	191.13	261.722	255.27	190.54	175.53
262.959	346.58	222.9	191.57	262.89	252.51	191.1	175.52
264.127	348.73	223.31	191.17	264.058	252.53	190.5	177.69
265.296	350.18	223.99	191.7	265.226	255.02	191.26	178.07
266.463	348.05	222.92	193.58	266.396	254.3	190.88	176.94
267.631	345.54	222.11	191.42	267.564	254.6	191.14	176.66
268.8	344.85	221.96	189.54	268.732	254.54	191.44	176.96
269.968	345.63	222.87	192.36	269.9	253.28	192.96	175.8
271.138	344.12	218.39	192.09	271.068	253.29	189.7	176.17
272.306	343.49	223.89	192.44	272.236	252.99	190.72	176.68
273.474	343.24	226.65	193.25	273.404	253.48	189.07	175.11
274.642	344.11	224.25	191.7	274.572	251.77	190.52	176.04
275.812	346.84	224.06	190.61	275.742	252.01	190	177.95
276.98	347.99	224.43	194.45	276.91	250.95	190.14	176.14
278.148	353.64	224.44	195.66	278.078	251.17	192.03	177.41
279.318	350.15	225.05	193.54	279.246	249.54	189.77	174.61
280.486	349.47	224.19	193.56	280.414	249.79	191.1	174.75
281.654	349.33	225.92	192.06	281.582	250.38	193.4	175.87
282.822	346.67	224.9	195.98	282.75	250.02	190.79	176.04
283.99	345.65	225.29	193.62	283.918	248.42	190.24	175.03
285.158	347.98	225.92	194.49	285.086	250.04	192	177.73
286.328	349.67	223.92	195.13	286.256	248.48	190.94	176.74
287.496	348.22	221.52	197.72	287.424	250.45	192.57	181.93
288.664	348.19	220.21	196.94	288.592	253.79	192.94	180.26
289.832	346.28	221.14	198.71	289.76	252.26	192.66	179.48
291	346.86	219.5	196.71	290.928	251.13	195.01	177.68
292.168	347.69	217.94	199.02	292.098	249.26	192.5	178.5
293.336	347.74	216.48	195.14	293.266	251.5	189.86	175.28
294.504	346.09	217.43	192.47	294.436	251.83	192.54	178.14
295.672	346.09	216.01	191.93	295.604	249.02	191.1	176.02
296.84	342.14	213.91	191.47	296.772	250.67	191.58	176.05
298.008	340.29	215.96	193.31	297.94	250.06	189.67	176.78
299.176	341.03	212.25	190.98	299.108	249.13	192.71	176.35
